# Supplementary material
Source: PubMed Central journal article supplement (PMC3494142)
Supplement: supp_M112.019463_mcp.M112.019463-1.pdf [file supp_M112.019463_mcp.M112.019463-1.pdf]

1 **SUPPLEMENTAL FIGURES**

2 **Discovery of O-GlcNAc proteins in published large-scale proteome**  
3 **data**

4

5

6 Hannes Hahne<sup>1</sup>, Amin Moghaddas Gholami<sup>1</sup>, Bernhard Kuster<sup>1, 2,\*</sup>

7

8

9 <sup>1</sup> Chair for Proteomics and Bioanalytics, Center of Life and Food Sciences Weihenstephan,  
10 Technische Universität München, Emil-Erlenmeyer-Forum 5, 85354 Freising, Germany

11 <sup>2</sup> Center for Integrated Protein Science Munich, Emil-Erlenmeyer-Forum 5, 85354 Freising,  
12 Germany

13

14

15

16 \* Corresponding author

17 Bernhard Kuster

18 e-Mail: kuster@tum.de

19 Tel. +49 8161 715696

20 Fax: +49 8161 715931

21

22 **Running Title:** O-GlcNAc protein identification

# 1 Supplemental Figures

**A Edit Modification :HexNAc (CID and O-linked)** Hannes Hahne Logout

**Name**

Title HexNAc (CID and O-linked)

Fullname N-acetylglucosamine by CID

Delta Specificity Ignore Masses Misc References

**Delta**

Monoisotopic **203.079373**

Average **203.1925**

Composition HexNAc

Symbols 13C 1 Add

**B**

Delta **Specificity** Ignore Masses Misc References

Specificity Site S Position Anywhere Copy Delete Hide Details

Classification Other glycosylation Hidden Group 0

Notes

Neutral loss  Scoring  Satellite  Peptide  Required Peptide Delete

Composition Symbols 13C 1 Add

Neutral loss  Scoring  Satellite  Peptide  Required Peptide Delete

Monoisotopic: **203.079373** Average: **203.1925**

Composition HexNAc Symbols 13C 1 Add

Neutral loss  Scoring  Satellite  Peptide  Required Peptide Delete

Monoisotopic: **221.089937** Average: **221.2078**

Composition HexNAc Water Symbols 13C 1 Add

Neutral loss  Scoring  Satellite  Peptide  Required Peptide Delete

Monoisotopic: **203.079373** Average: **203.1925**

Composition HexNAc Symbols 13C 1 Add

Neutral loss  Scoring  Satellite  Peptide  Required Peptide Delete

Monoisotopic: **221.089937** Average: **221.2078**

Composition HexNAc Water Symbols 13C 1 Add

New Neutral Loss

**C**

Delta Specificity **Ignore Masses** Misc References

**Ignore Masses**

Ignore Mass 1 Monoisotopic **204.086649** Average **204.1999** Delete

Composition H HexNAc e(-1)

Symbols 13C 1 Add

Ignore Mass 2 Monoisotopic **186.076084** Average **186.1846** Delete

Composition H HexNAc Water(-1) e(-1)

Symbols 13C 1 Add

Ignore Mass 3 Monoisotopic **168.065519** Average **168.1694** Delete

Composition H HexNAc Water(-2) e(-1)

Symbols 13C 1 Add

Ignore Mass 4 Monoisotopic **144.065519** Average **144.1480** Delete

Composition C(6) H(10) N O(3) e(-1)

Symbols 13C 1 Add

Ignore Mass 5 Monoisotopic **138.054955** Average **138.1434** Delete

Composition C(7) H(8) N O(2) e(-1)

Symbols 13C 1 Add

Ignore Mass 6 Monoisotopic **126.054955** Average **126.1327** Delete

Composition C(6) H(8) N O(2) e(-1)

Symbols 13C 1 Add

New Ignore Mass

2

3 **Figure S1.** HexNAc modification definition for Mascot. In the standard setting, Mascot provides  
4 the proper composition and exact mass for HexNAc. However, the standard modification  
5 definition should be extended as depicted in the “Specificity” (B) and in the “Ignore Masses” tab  
6 (C). To achieve proper matching of sequence-specific peptide fragments, it is important to set the

1 HexNAc fragment neutral loss as “scoring” as depicted in panel B. These fragment neutral loss  
2 peaks are then considered for scoring and significantly improve the matching of sequence-  
3 specific ions and the Mascot score. Otherwise, these fragment neutral loss peaks would be  
4 treated as noise and reduce the Mascot ion score. The “peptide” neutral loss setting matches the  
5 neutral loss from the intact peptide, which is then not treated as noise peak for scoring. As  
6 depicted in panel C, the HexNAc oxonium ion as well as its fragments should be included in the  
7 “Ignore Masses” list. A detailed explanation of the modification definitions can also be found at  
8 the Mascot website ([www.matrixscience.com/help/pt\\_mods\\_help.html](http://www.matrixscience.com/help/pt_mods_help.html)).

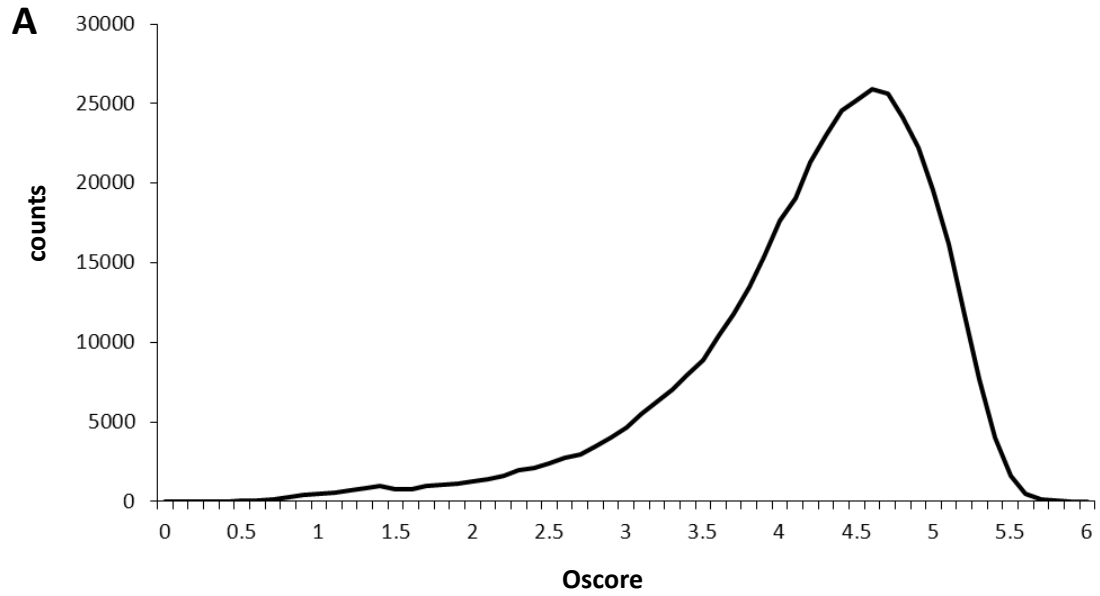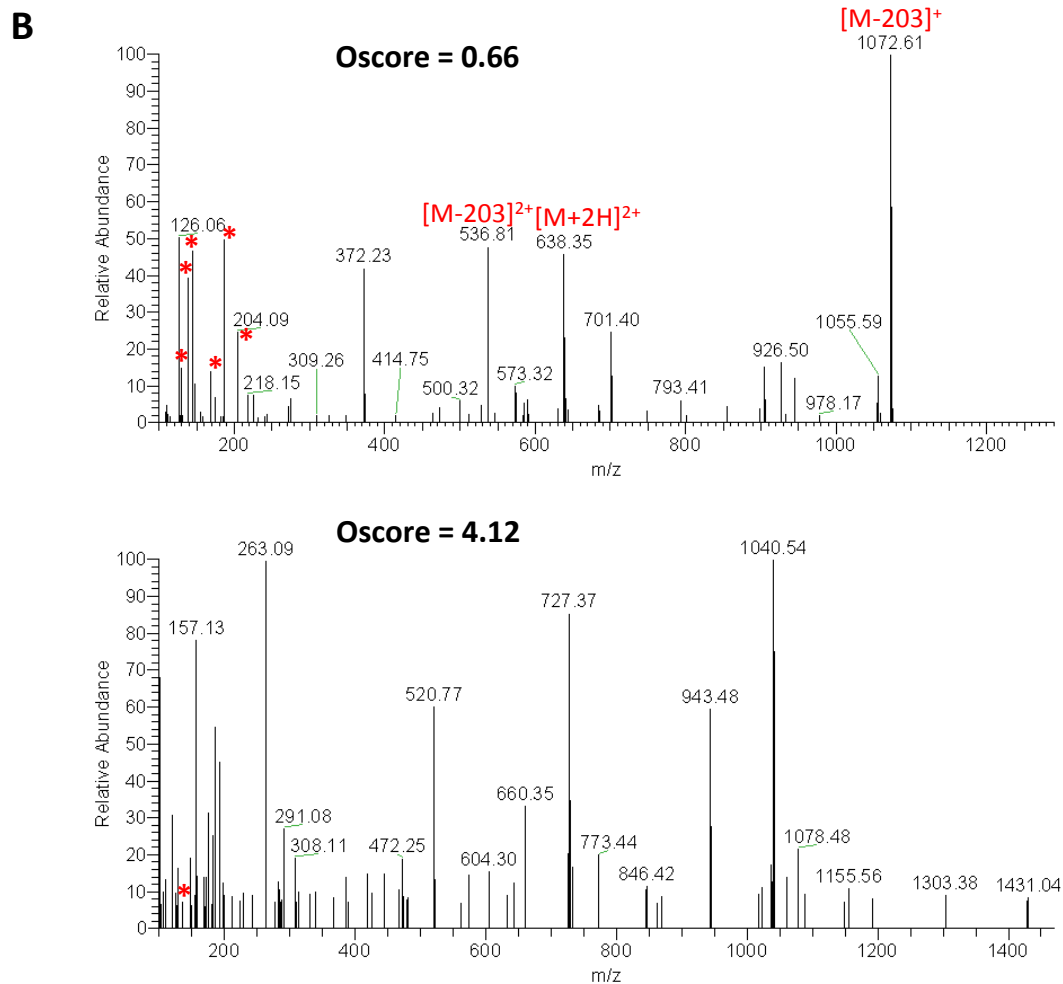

1

2 **Figure S2.** Typical Oscore distribution and representative spectra for low and high Oscores. **(A)**  
 3 The Oscore distribution is based on 414,599 spectra (complete Geiger *et al.* data set), for which  
 4 an Oscore could be calculated. **(B)** The upper spectrum represents a typical O-GlcNAc case with

1 a low Oscore, where most of the abundant fragment ions point to the O-GlcNAc modification  
2 (indicated in red). The spectrum below represents a typical “high Oscore” case and only contains  
3 one weak fragment ion ( $m/z$  126.05) diagnostic for O-GlcNAc.

4

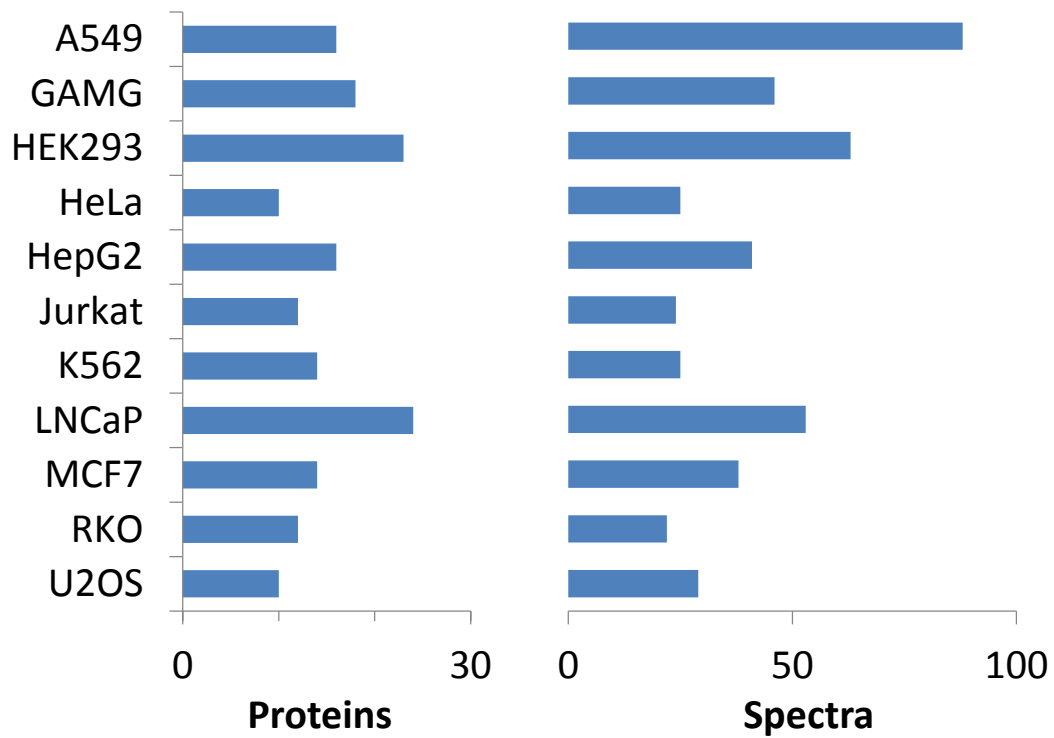

1

2 **Figure S3.** O-GlcNAc protein identifications and O-GlcNAc spectra across all eleven cell lines  
 3 analyzed by Geiger *et al.* (Geiger, T., Wehner, A., Schaab, C., Cox, J., and Mann, M.  
 4 Comparative proteomic analysis of eleven common cell lines reveals ubiquitous but varying  
 5 expression of most proteins. *Mol. Cell. Proteomics* 11, M111 014050).
