# Supplementary material
Source: PubMed Central journal article supplement (PMC3494142)
Supplement: supp_M112.019463_mcp.M112.019463-2.pdf [file supp_M112.019463_mcp.M112.019463-2.pdf]

## Supplemental spectra

### Discovery of O-GlcNAc-modified proteins in published large-scale proteome data

Hannes Hahne<sup>1</sup>, Amin Moghaddas Gholami<sup>1</sup>, Bernhard Kuster<sup>1, 2, \*</sup>

<sup>1</sup> Chair for Proteomics and Bioanalytics, Center of Life and Food Sciences Weihenstephan, Technische Universität München, Emil-Erlenmeyer-Forum 5, 85354 Freising, Germany

<sup>2</sup> Center for Integrated Protein Science Munich, Emil-Erlenmeyer-Forum 5, 85354 Freising, Germany

\* Corresponding author

Bernhard Kuster

e-Mail: [kuster@tum.de](mailto:kuster@tum.de)

Tel. +49 8161 715696

Fax: +49 8161 715931

## Legend

This Supplemental File contains the manually validated tandem mass spectra of O-GlcNAc peptides described in the main manuscript. The spectrum number corresponds to the spectrum number given in Supplemental Table S4 and S7. Owing to the high lability of the O-glycosidic bond, usually fragments do not retain the modification during HCD fragmentation. Consequently, it is often impossible to localize the O-GlcNAc site and to identify the fragments which have undergone a neutral HexNAc loss. Therefore, we modified the standard nomenclature and annotated modified fragments with the delta mass to the unmodified fragment. For example, fragments which retain the GlcNAc group would be denoted e.g. as “y<sub>5</sub>+203”, whereas the fragment with a GlcNAc neutral loss (which leaves the fragment unmodified) would be simply “y<sub>5</sub>”. Accordingly, the neutral loss of phosphoric acid (H<sub>3</sub>PO<sub>4</sub>) from an y<sub>5</sub> ion is according to common nomenclature denoted as “y<sub>5</sub>-98”, but according to our nomenclature as “y<sub>5</sub>-18” in the annotated spectra.



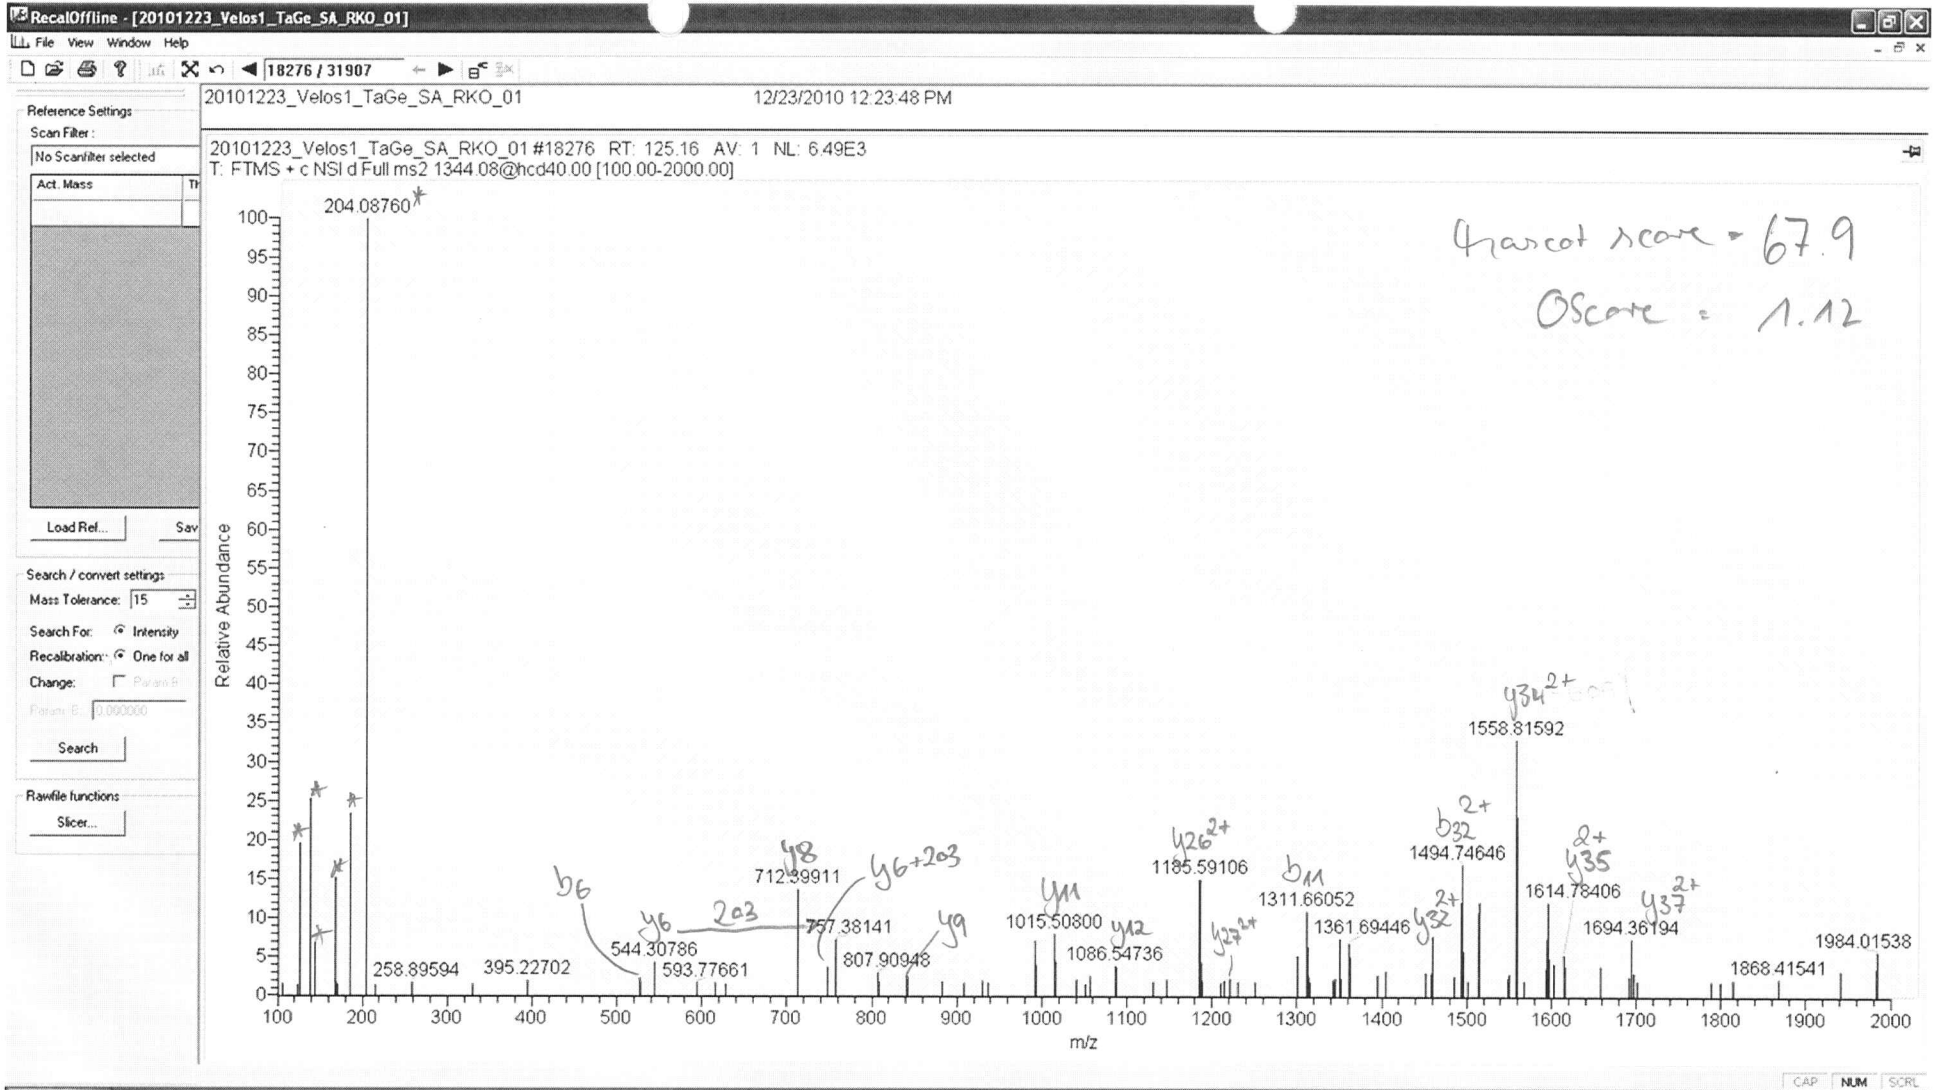

AVSTP**b6**PATTQQSAPASTTAVTSSTTTTVAQA**b32**PTVPALAPTSTPASITPASATAssEPAPAsAAK

*S63;*  
*2 sites unknown*

*y37* *b34* *b32* *y30* *y6*

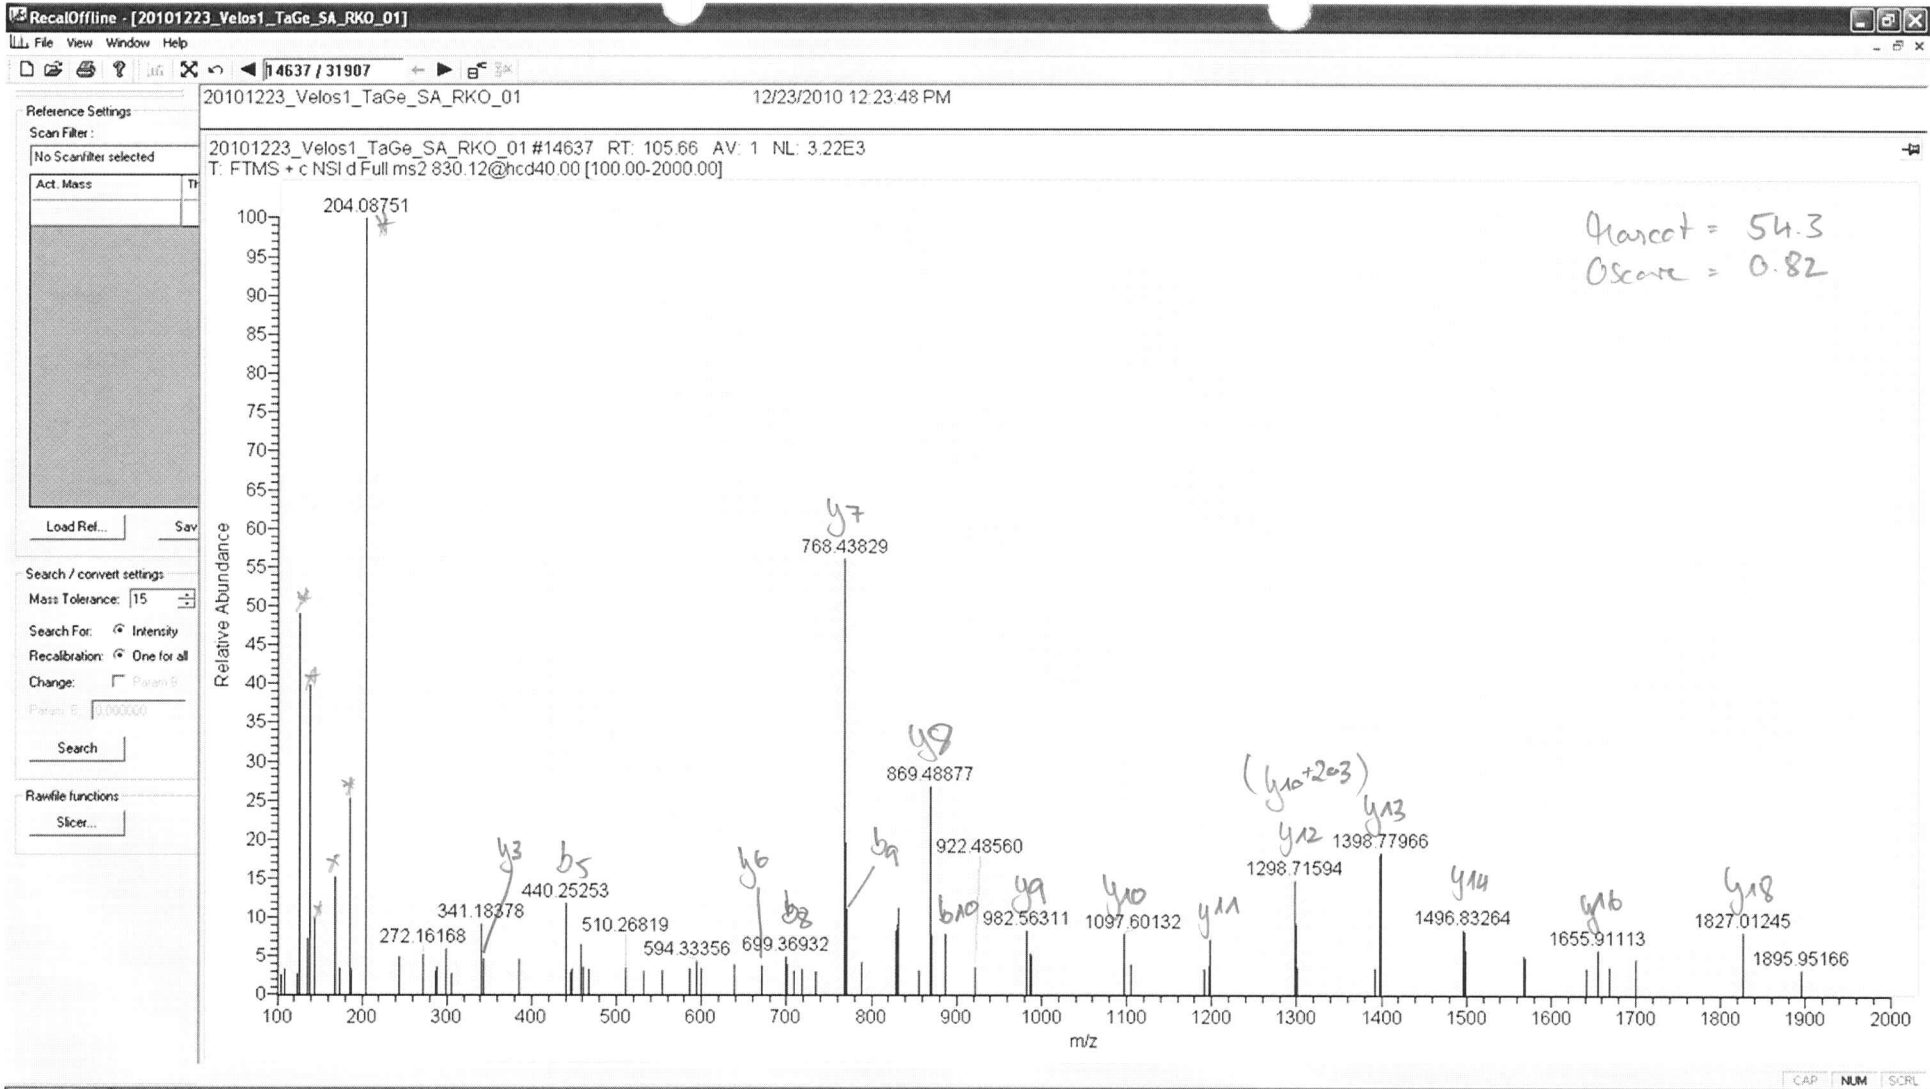

$y_{18}$   $y_{16}$   $y_{14}$   $y_{13}$   $y_{12}$   $y_{11}$   $y_{10}$   $y_7$   $y_6$   $y_3$   
 AVT**S**V**T**ASAV**V**TTNLTPV**Q**TPAR  
 $b_{10}$

no hit evidence

Reference Settings

Scan Filter:

No Scanfilter selected

Act. Mass

Load Ref... Sav

Search / convert settings:

Mass Tolerance: 15

Search For: Intensity

Recalibration: One for all

Change: Param 6

Param. 6: 0.000000

Search

Rawfile functions:

Skcer...

20101223\_Velos1\_TaGe\_SA\_RKO\_01 #13565 RT: 99.93 AV: 1 NL: 8.33E2  
T: FTMS + c NSI d Full ms2 773.42@hcd40.00 [100.00-2000.00]

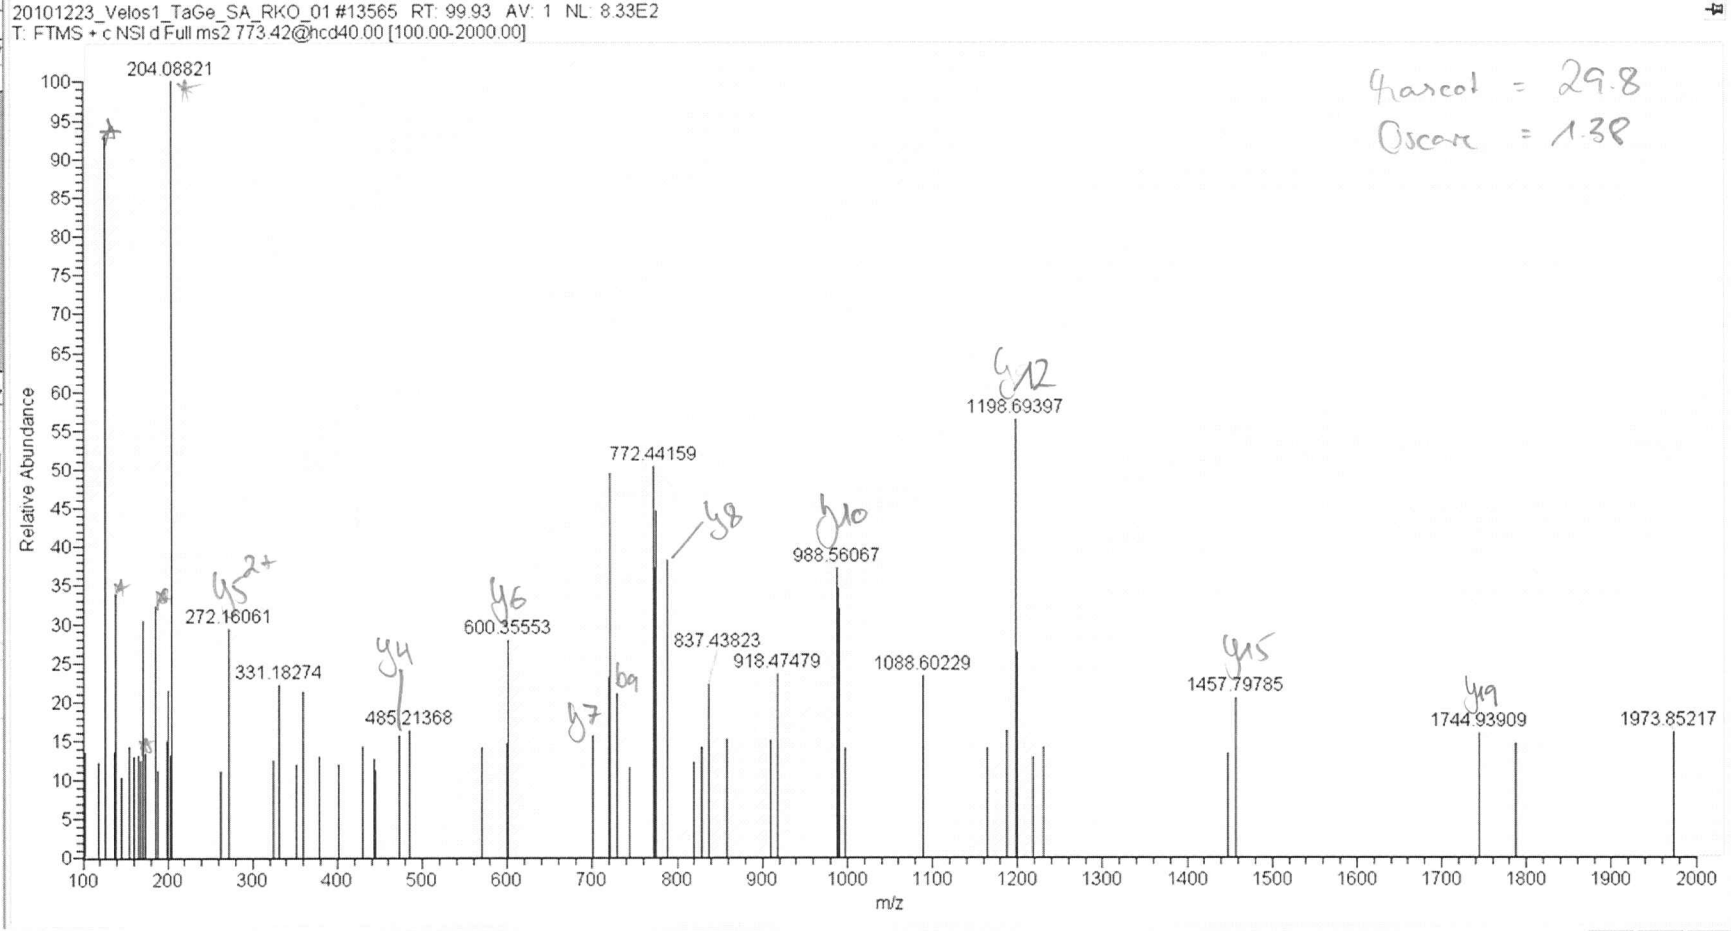

Gascol = 29.8  
Oscare = 1.38

TVAVASGAASTPISISTGAPtVR

no site evidence

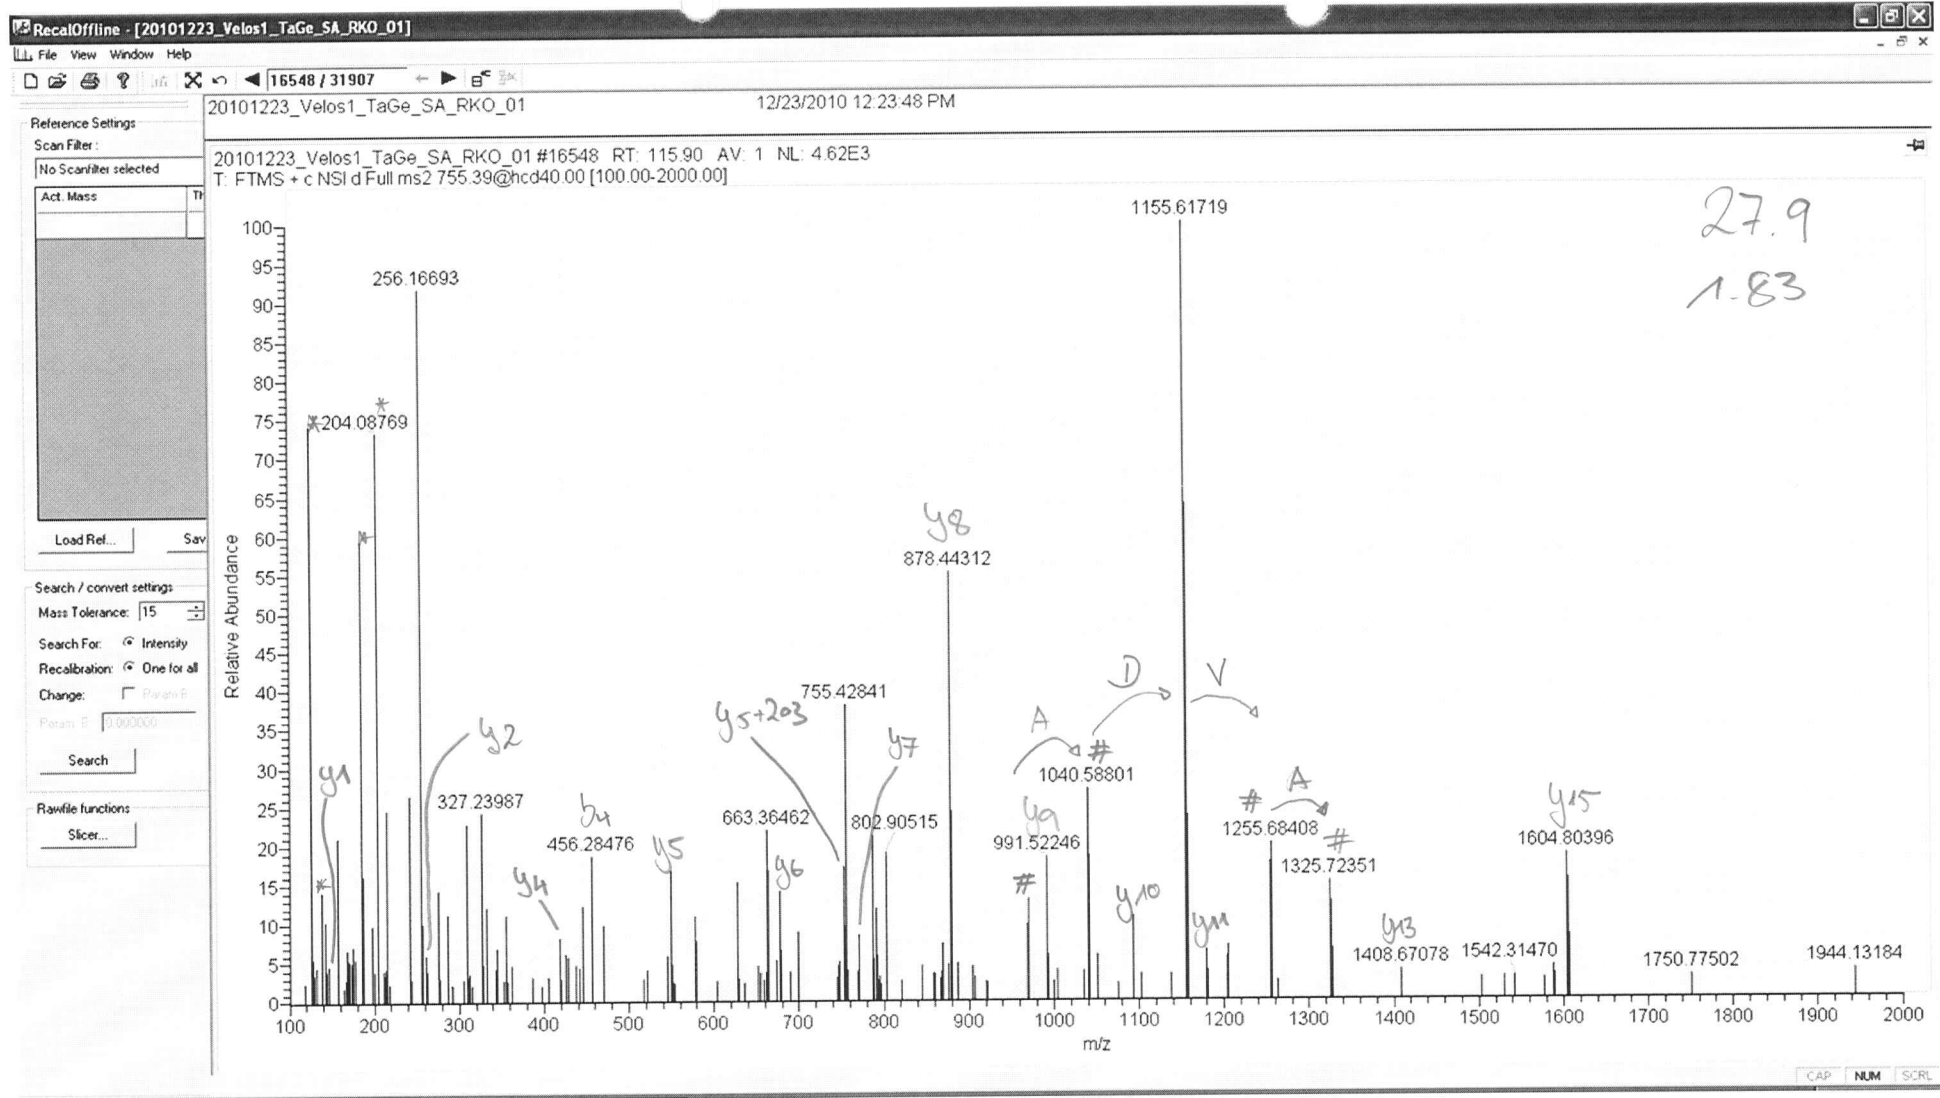

LTLQPV<sup>y13</sup>DNSTISLQMG<sup>y5</sup>TnK

T17

# Chimeric spectrum;  
series from 2nd  
precursor

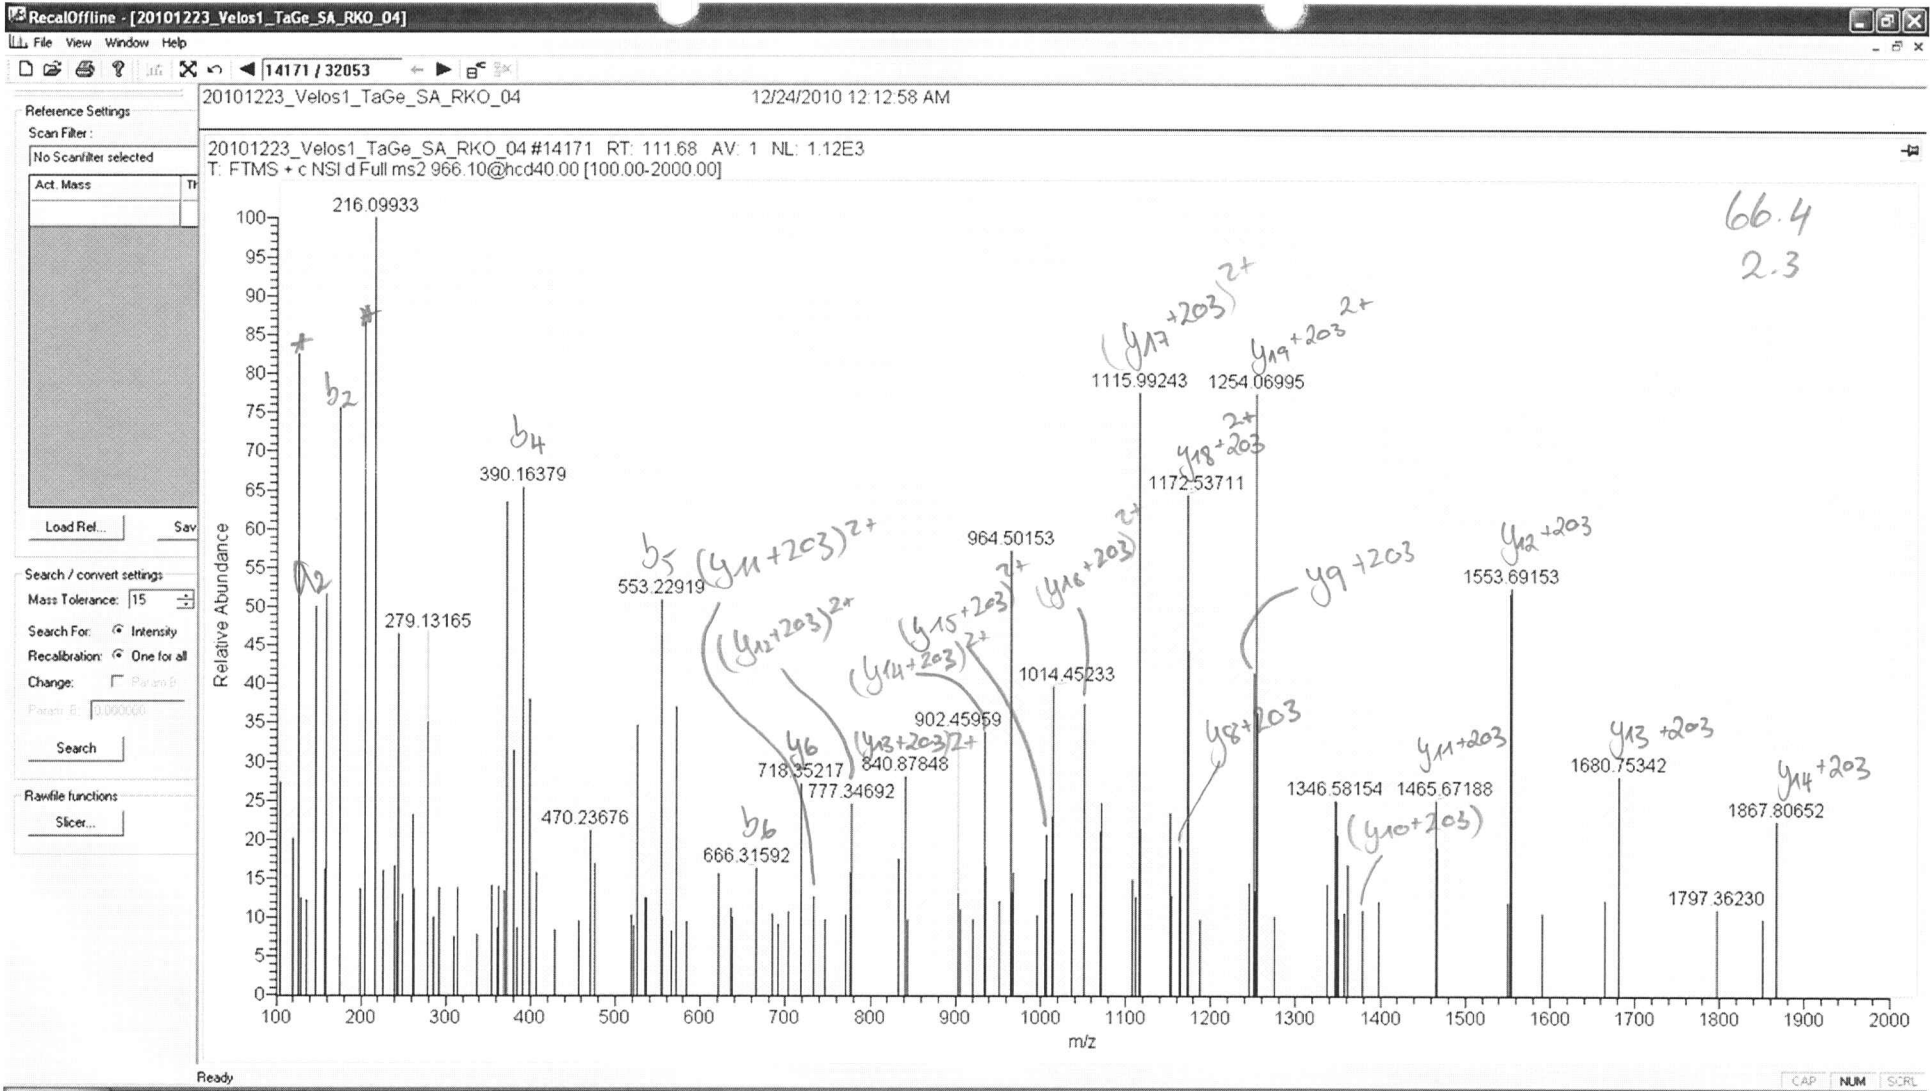

SSSQYIESFWQSSQSQ<sub>n</sub>FTAHDK

N17

20101210\_Velos1\_AnWe\_SA\_U2OS\_1 #2110 RT: 11.13 AV: 1 NL: 3.26E4  
T: FTMS + c NSI d Full ms2 657.36@hcd40.00 [100.00-1325.00]

Reference Settings

Scan Filter:  
No Scanfilter selected

Act. Mass

Load Ref... Sav

Search / convert settings:  
Mass Tolerance: 15  
Search For: Intensity  
Recalibration: One for all  
Change: Param B  
Param B: 0.000000  
Search

Rawfile functions  
Slicer...

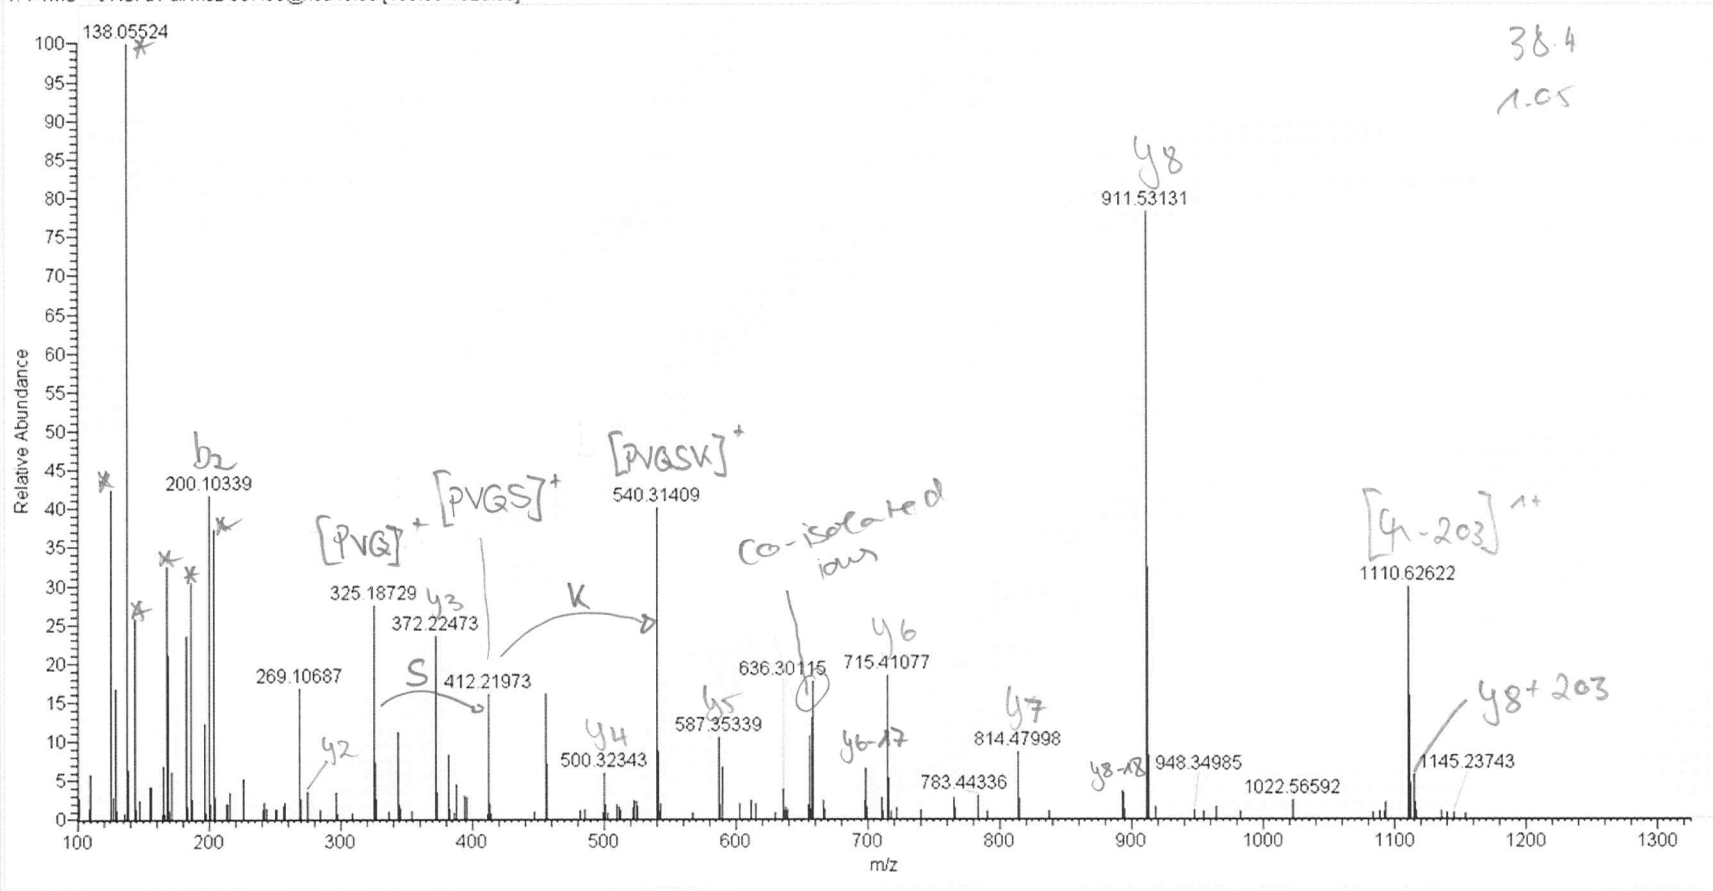

AQPVQ<sub>s</sub>KPQK

S6



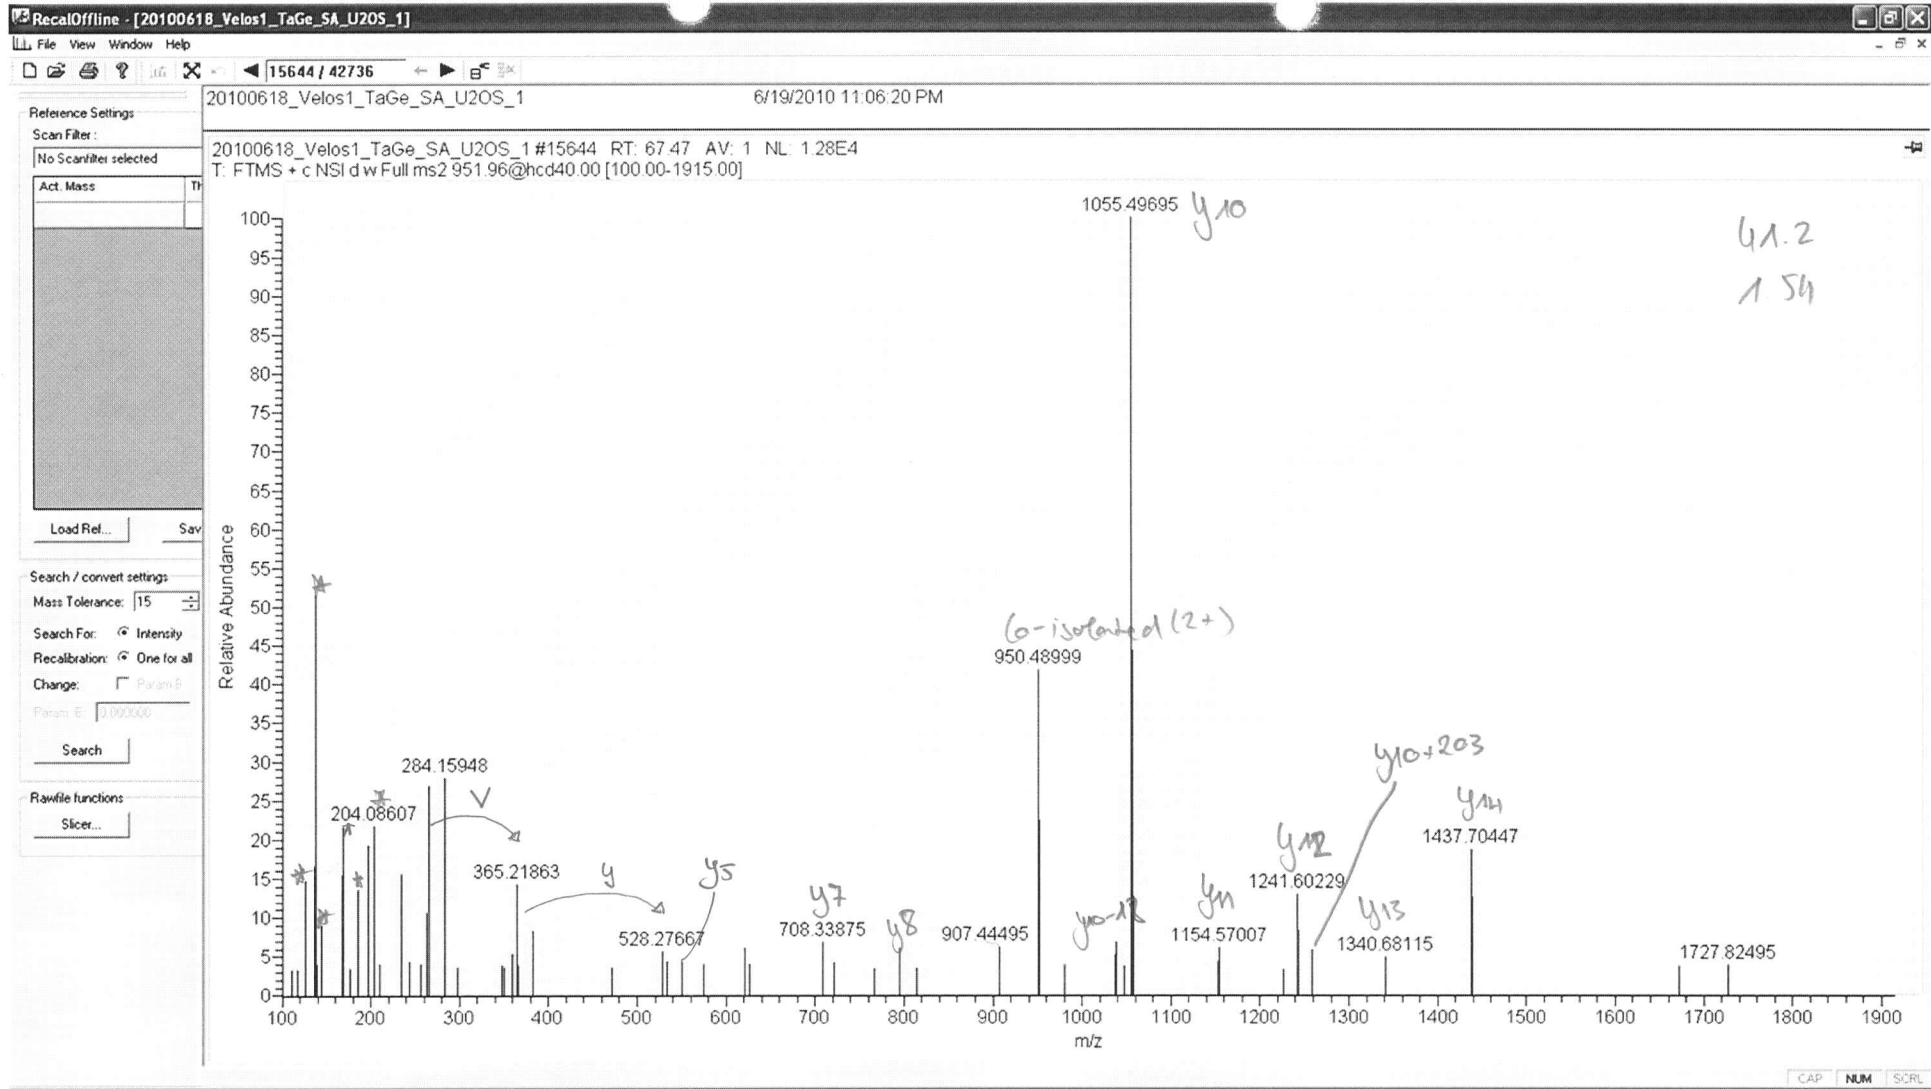

*y10*  
VYPVSPYSSAQSTsK

not S5;  
S9, S10, S13, T14 or  
S15

M



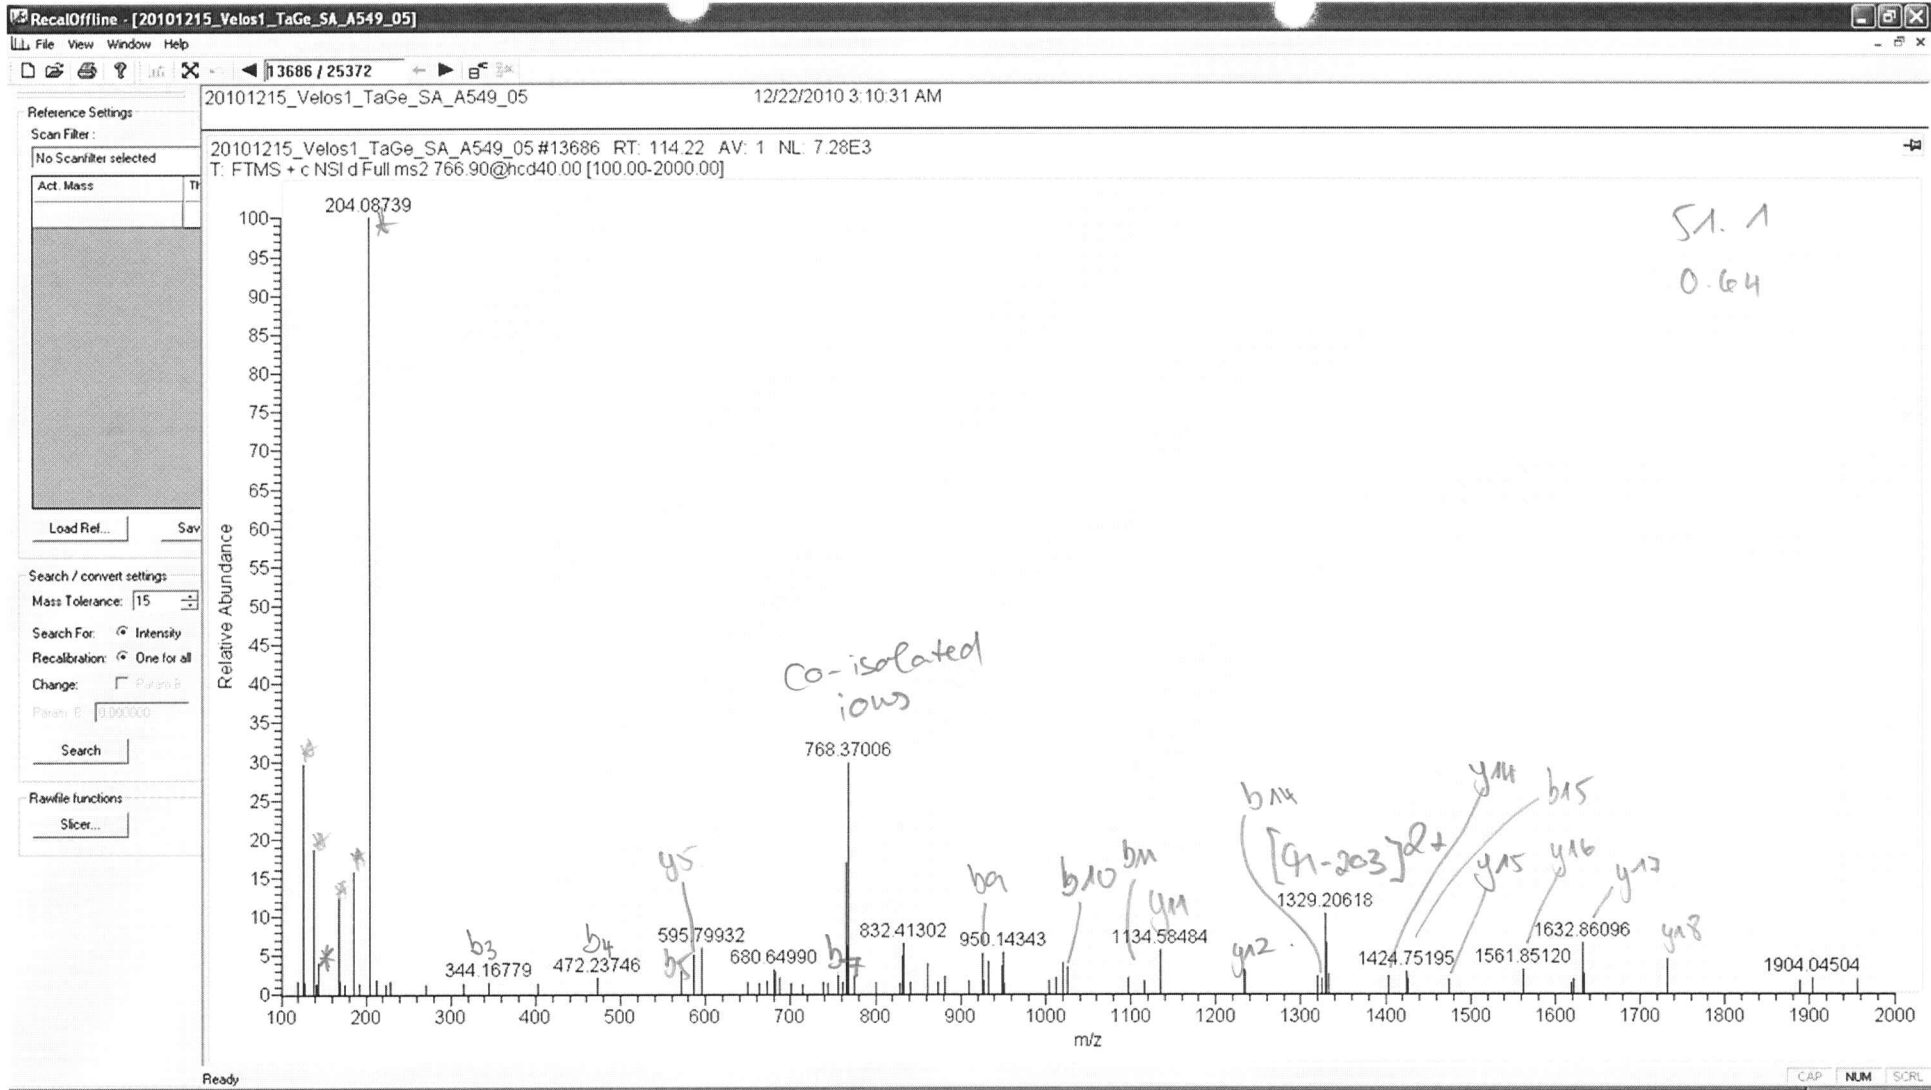

TLEQVGQGIVASAAVVTTASSTP<sup>y5</sup>ntVR

no site  
evidence

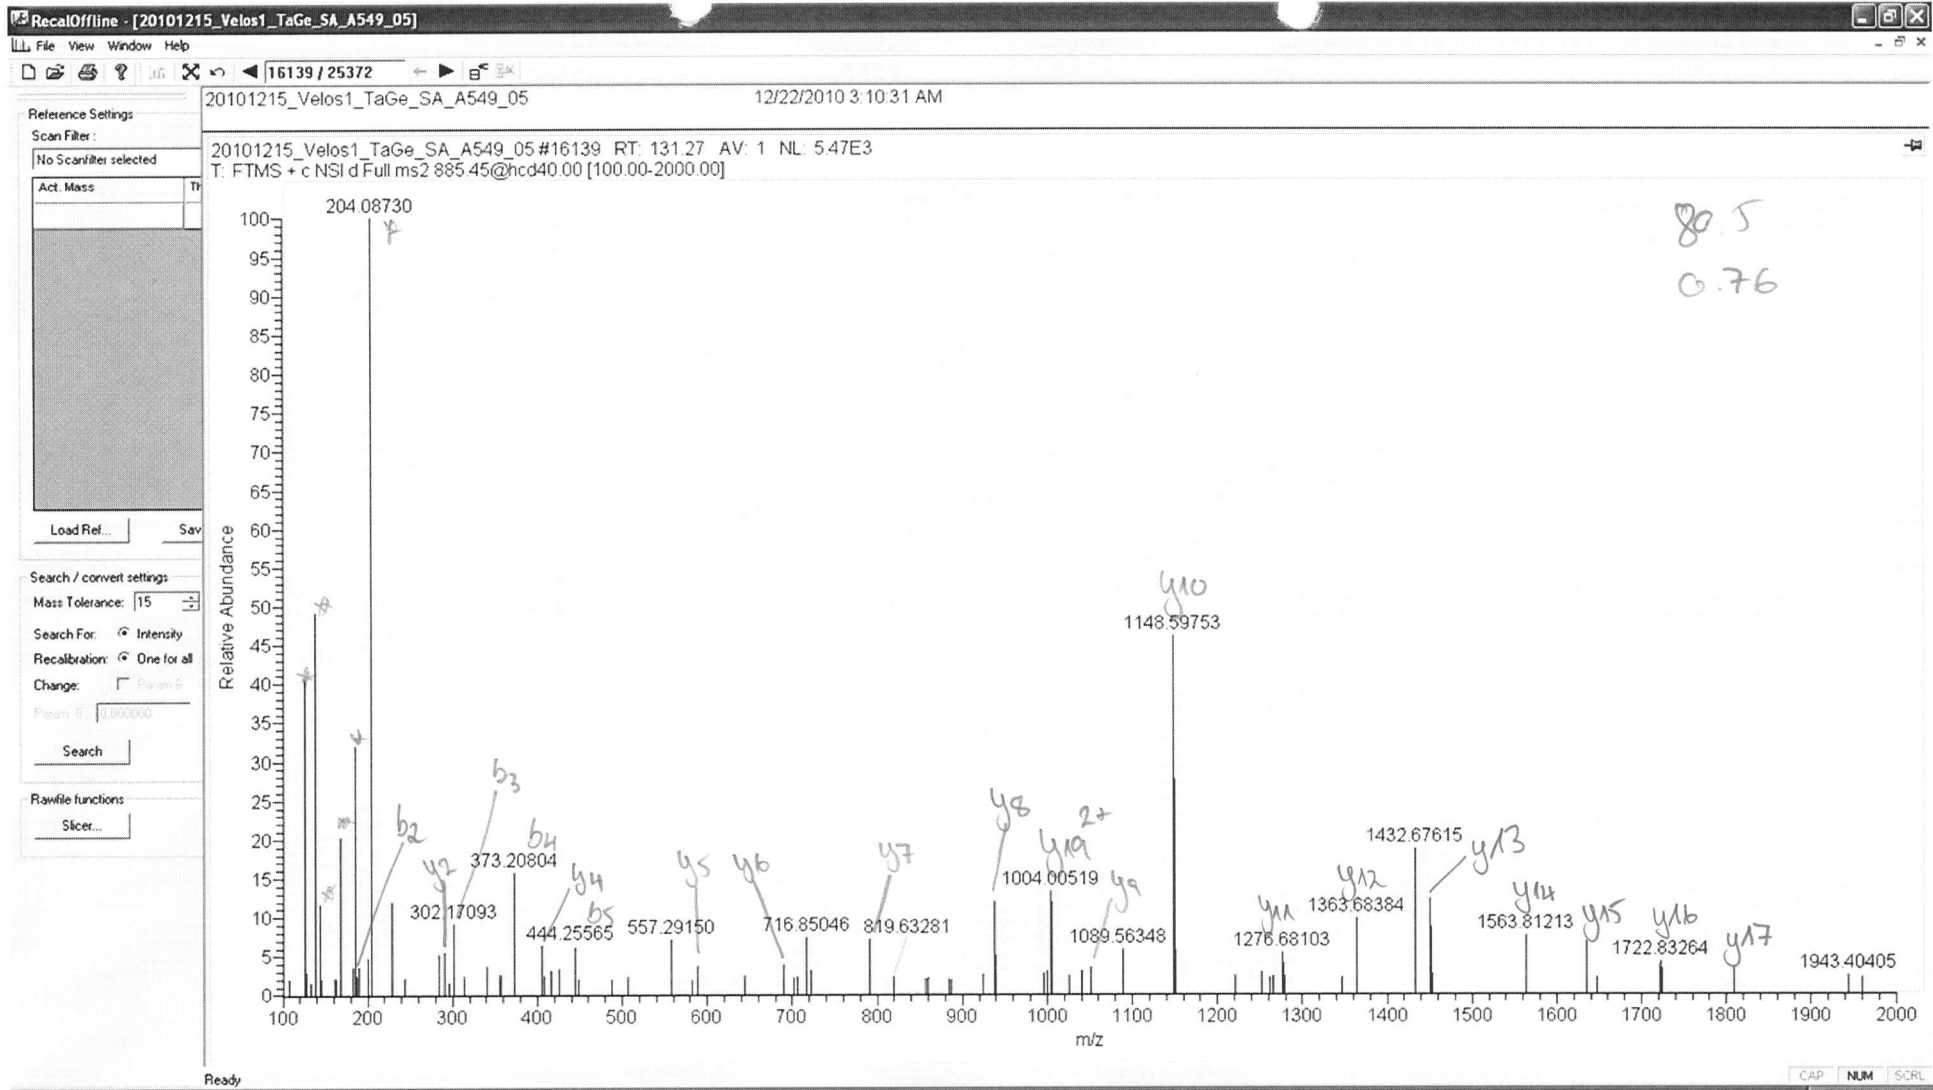

STIAAPTSSALSSQPIFT<sup>y10</sup>tAIDDR

no site  
evidence

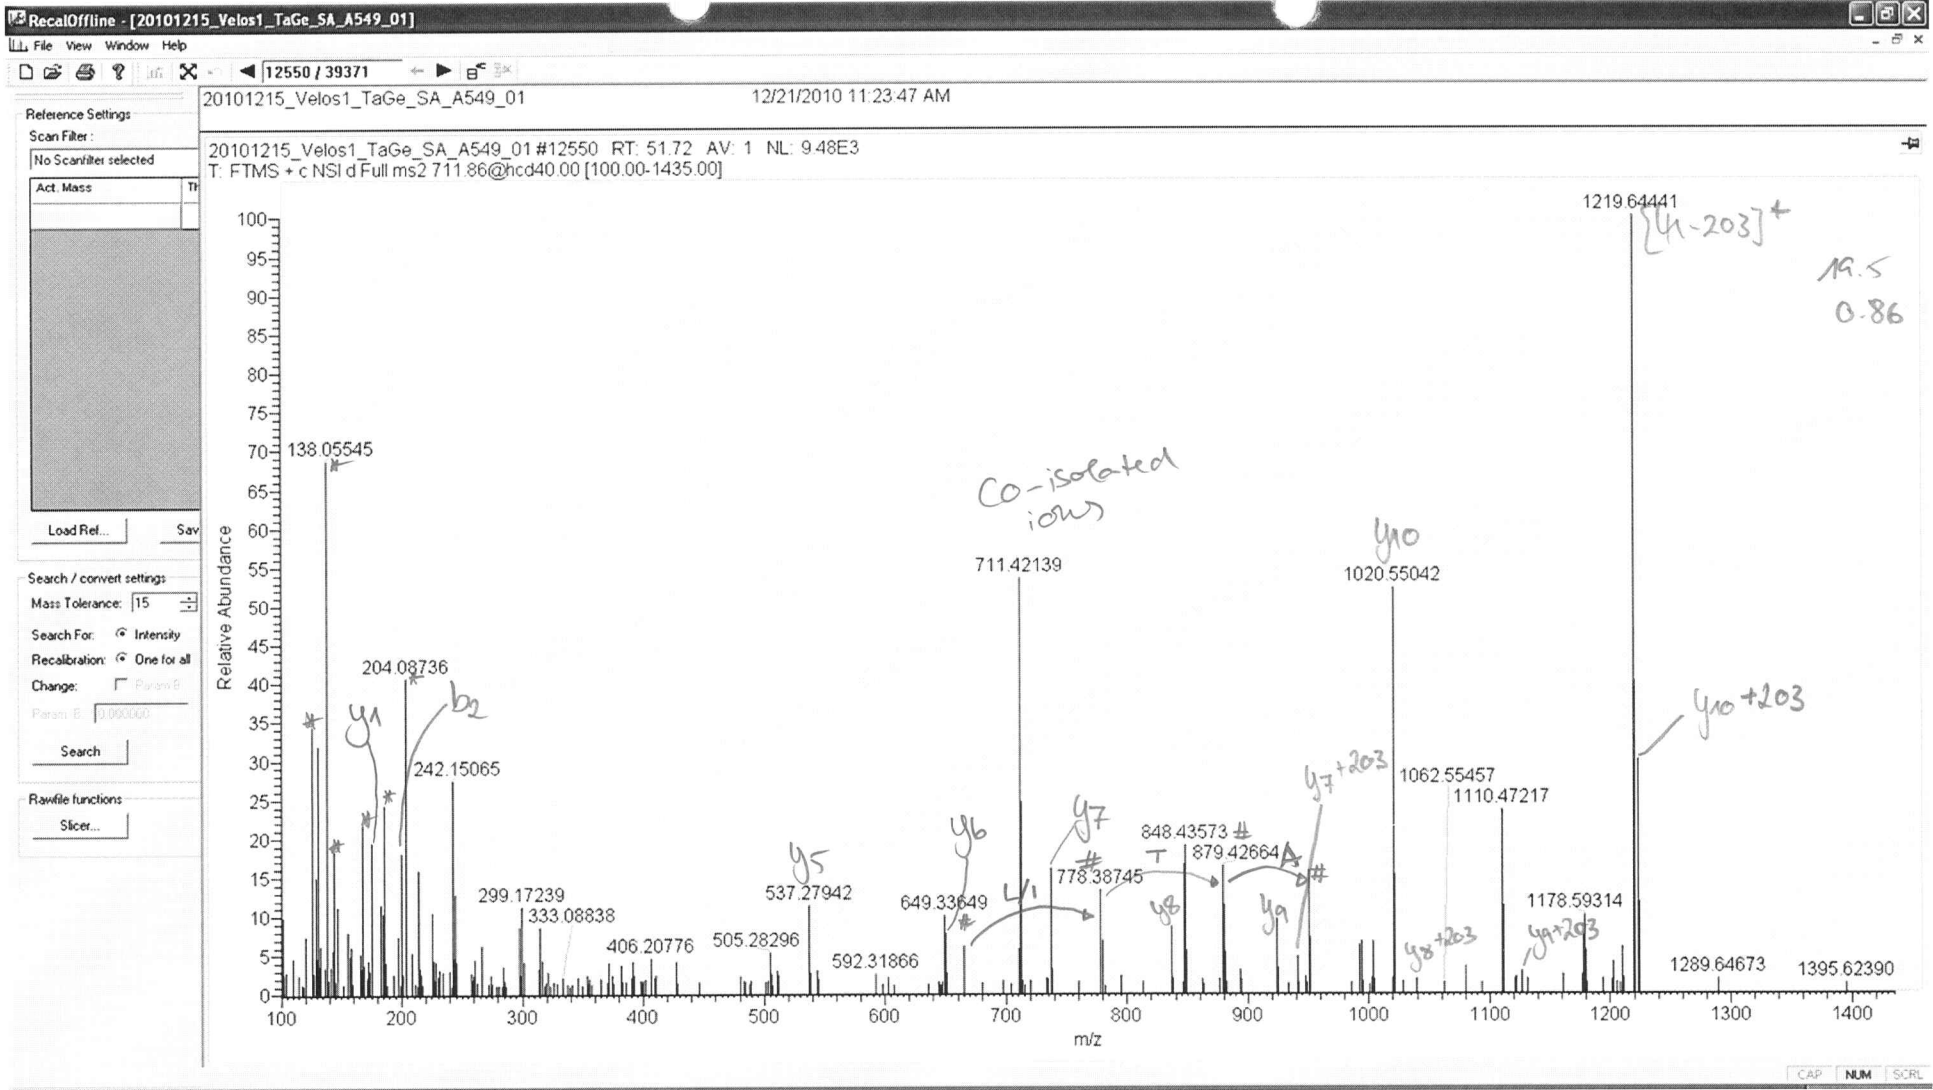

AQPSVSLGAAAYR

S6

# chimeric spectrum;  
series from second precursor

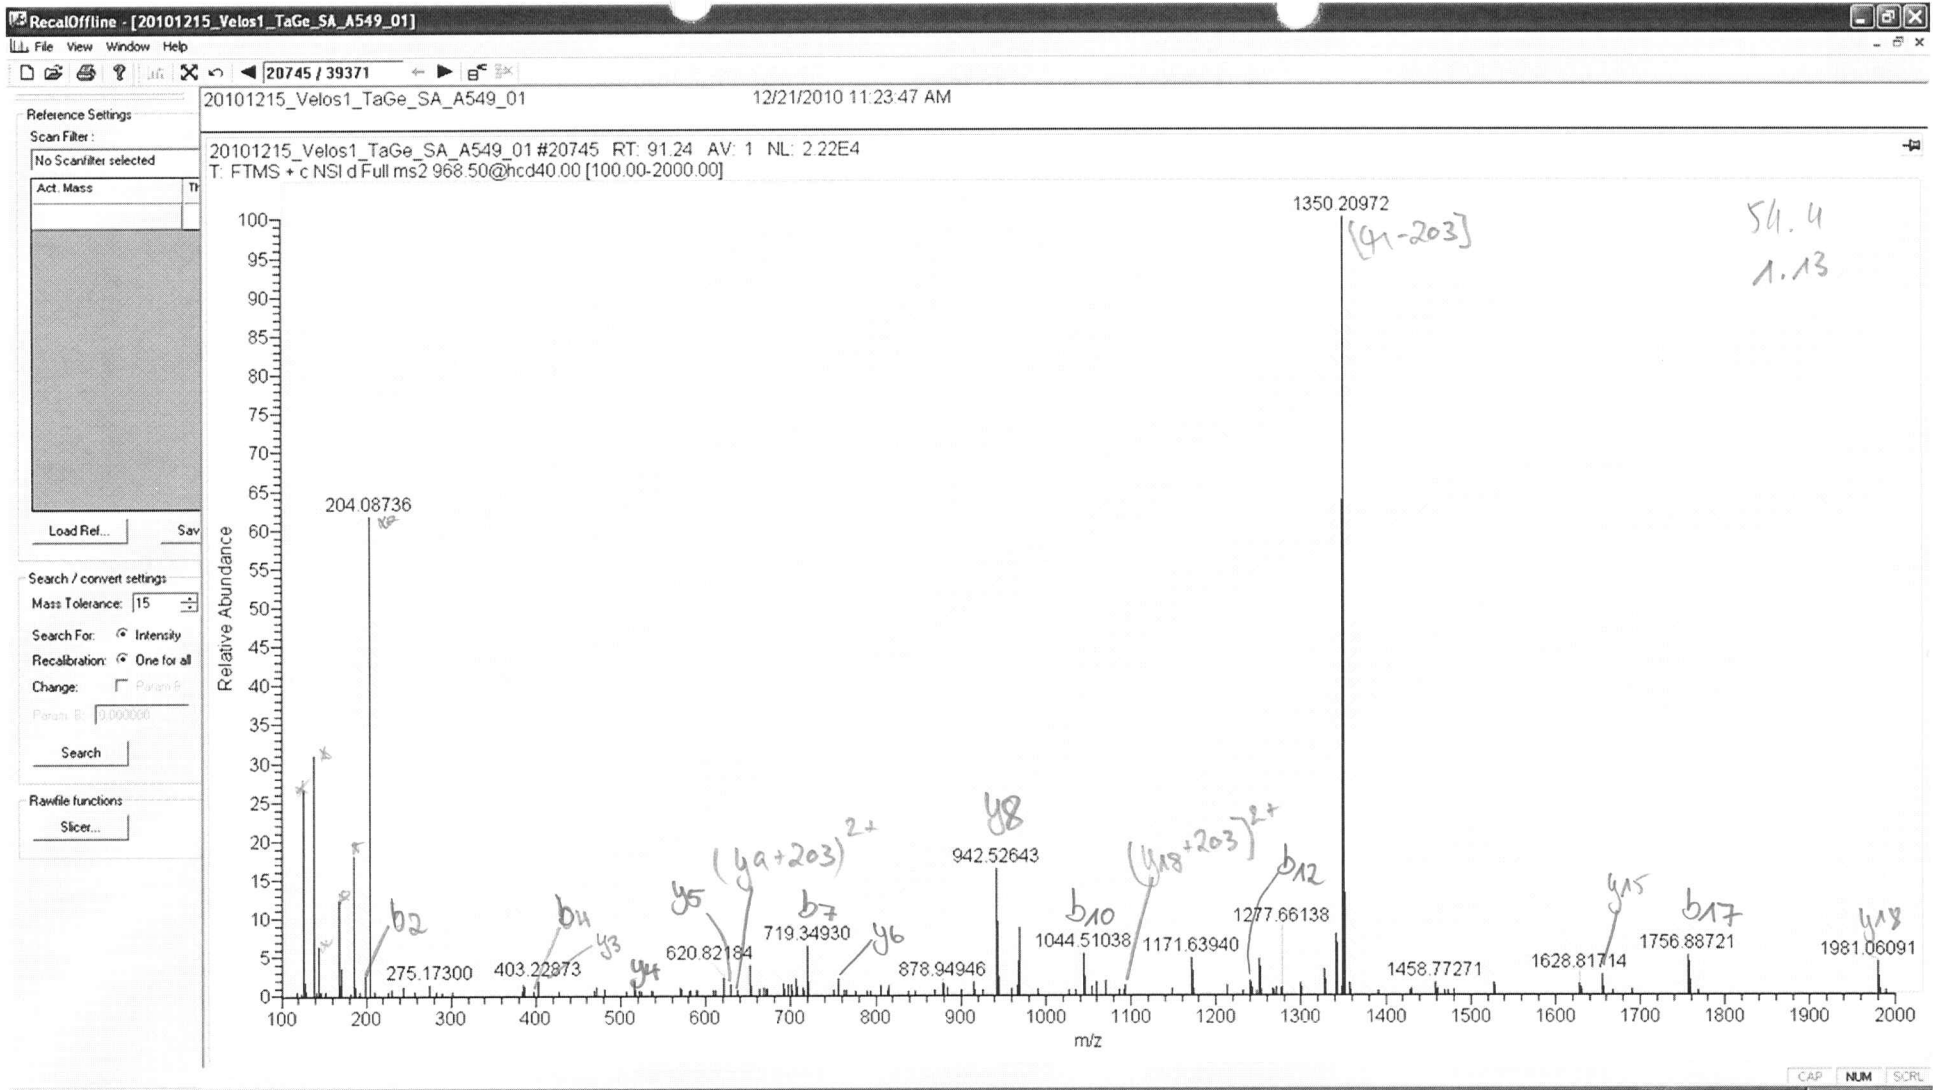

S19

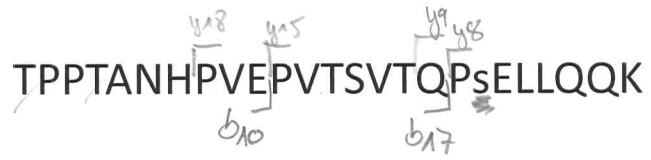



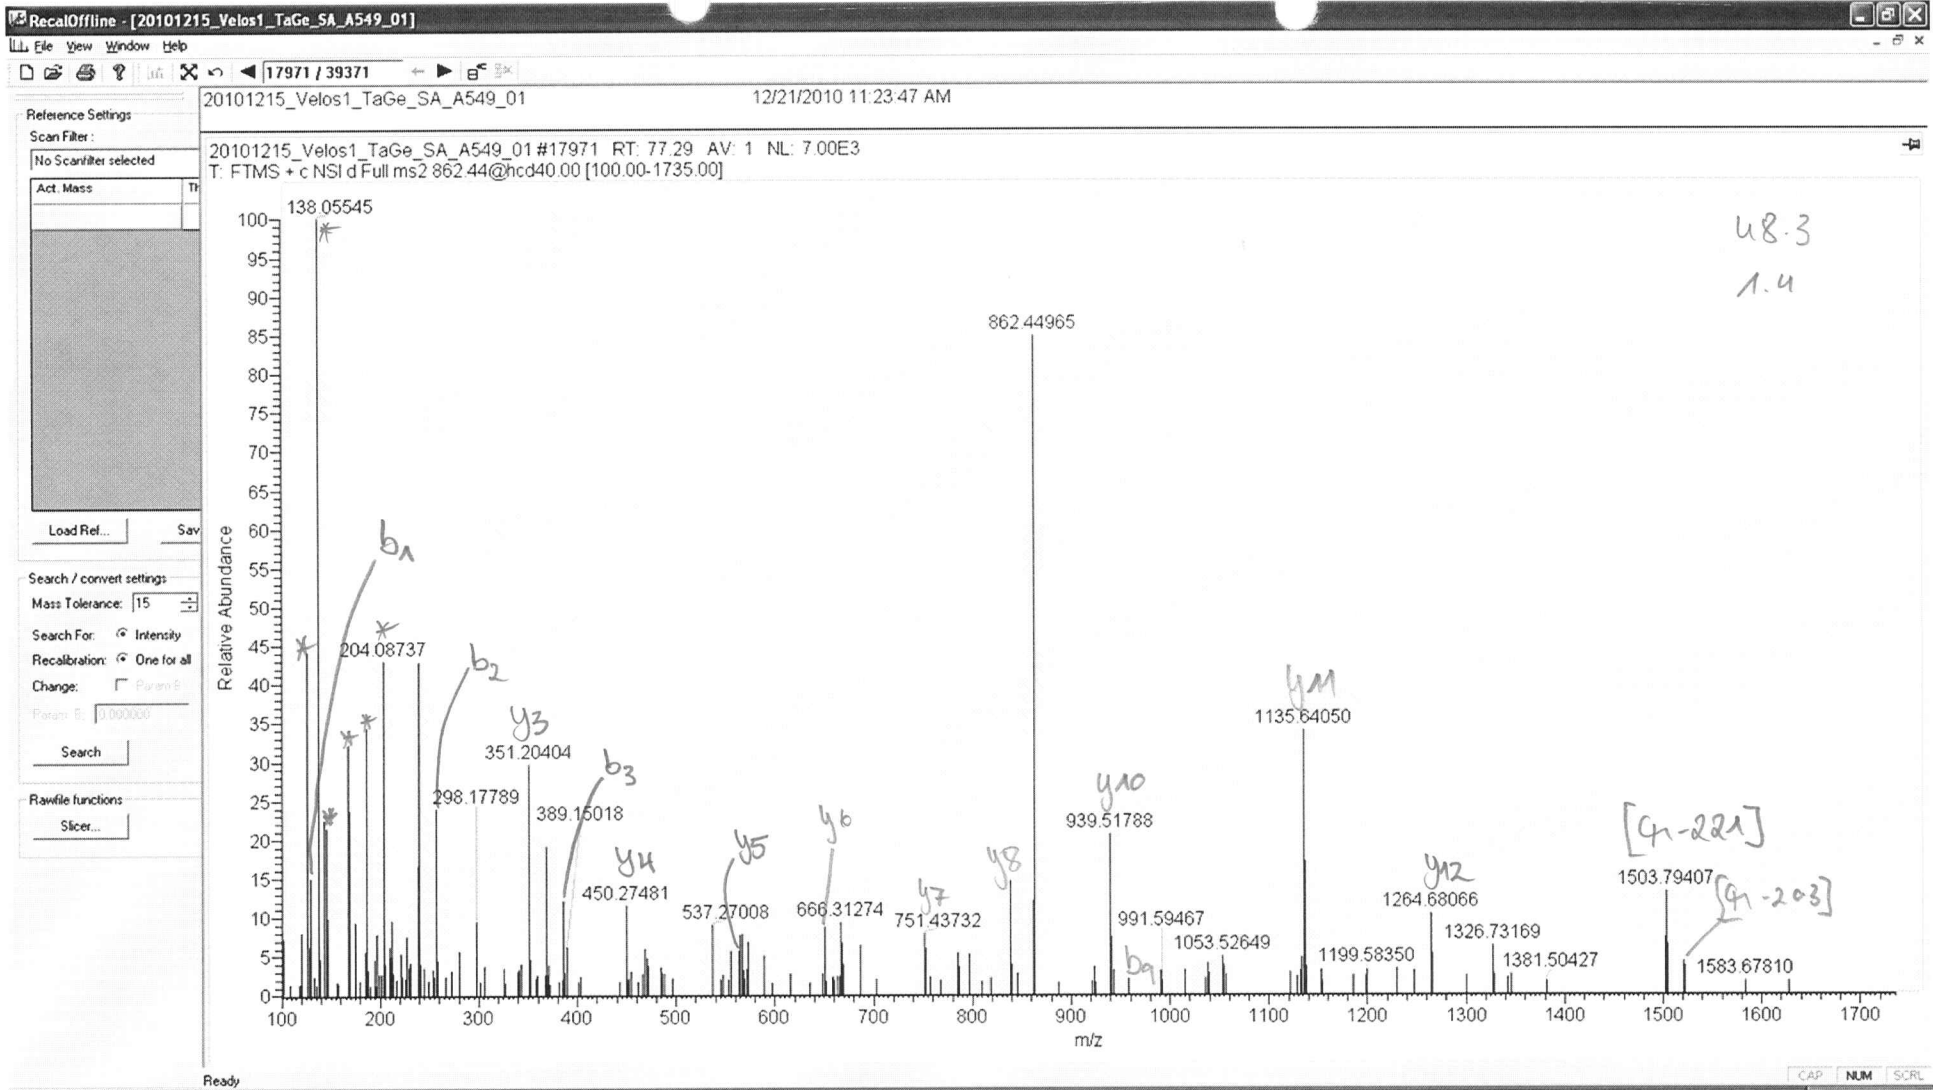

QQEPVTSTsLVFGK

No site evidence

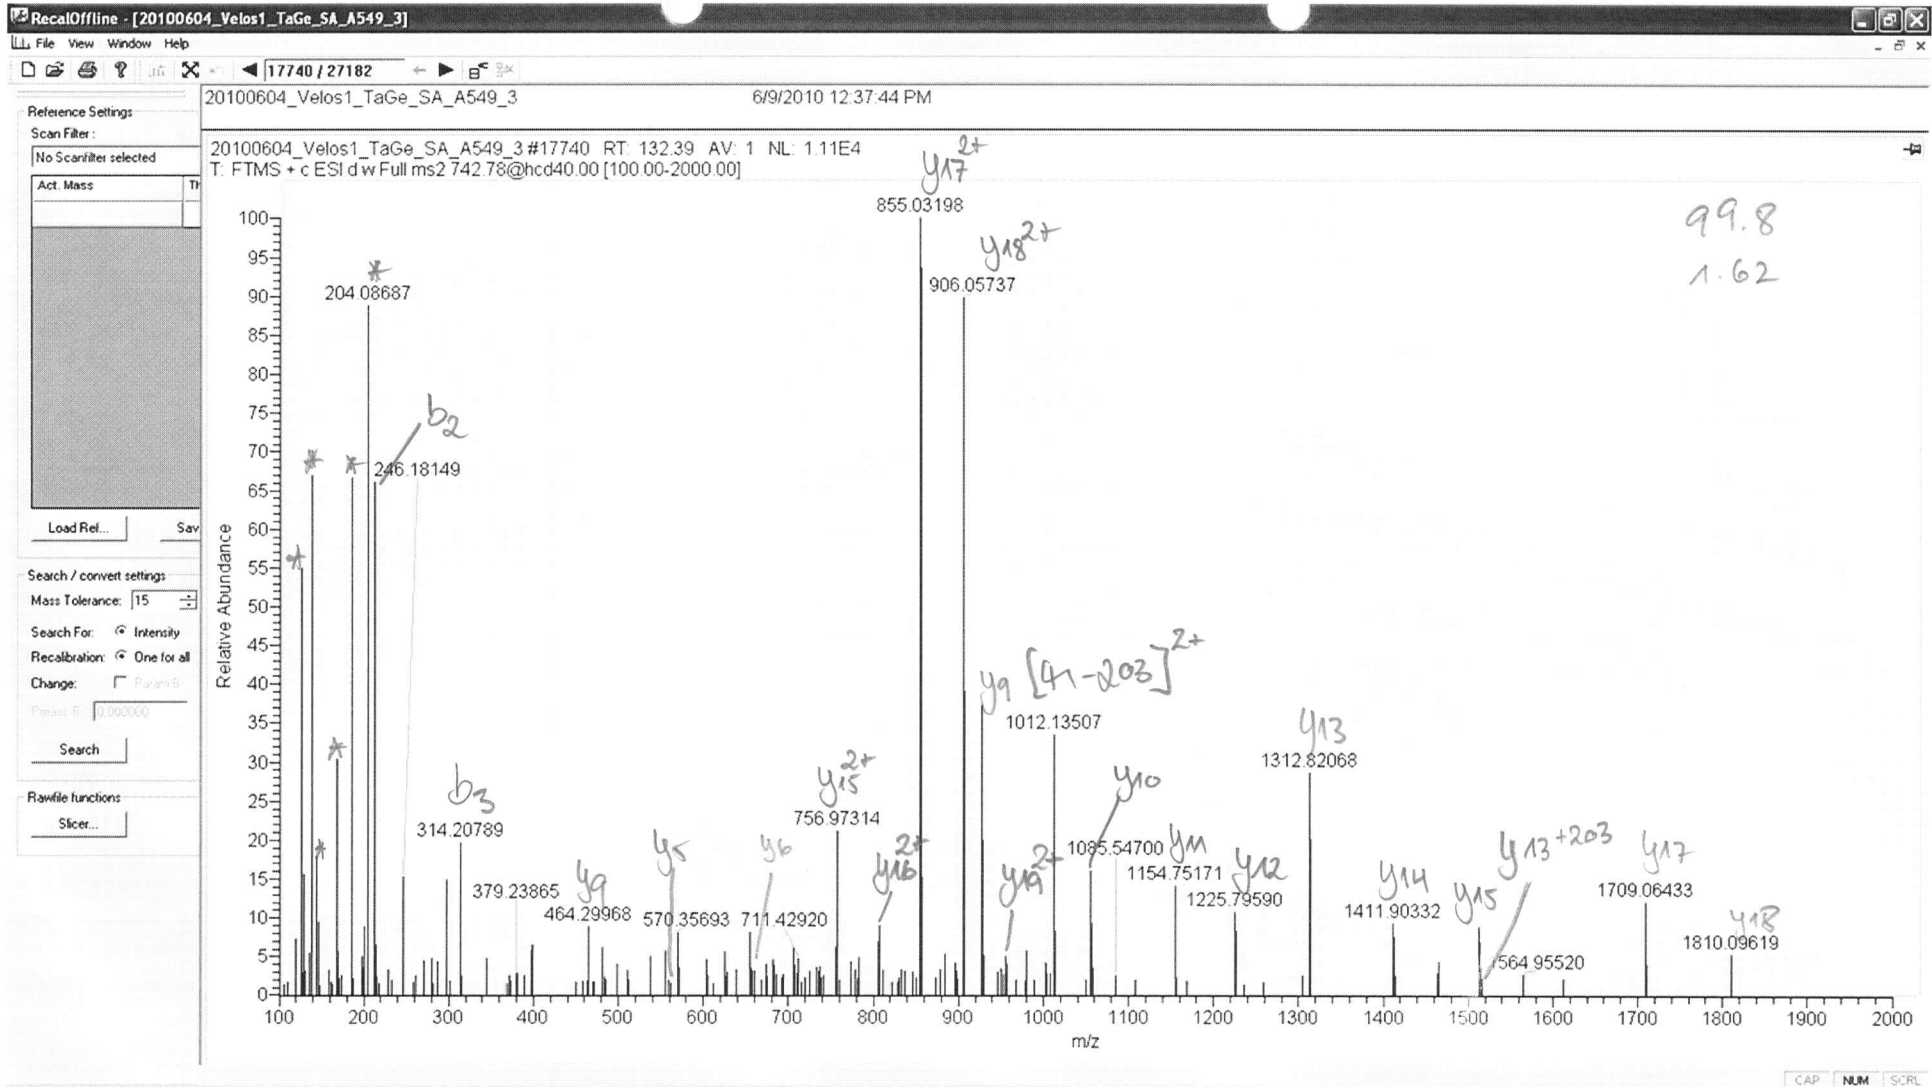

<sup>y13</sup> <sup>y9</sup>  
LVTPVTVSAVKPAVTtLVVK

S8, T15 or T16

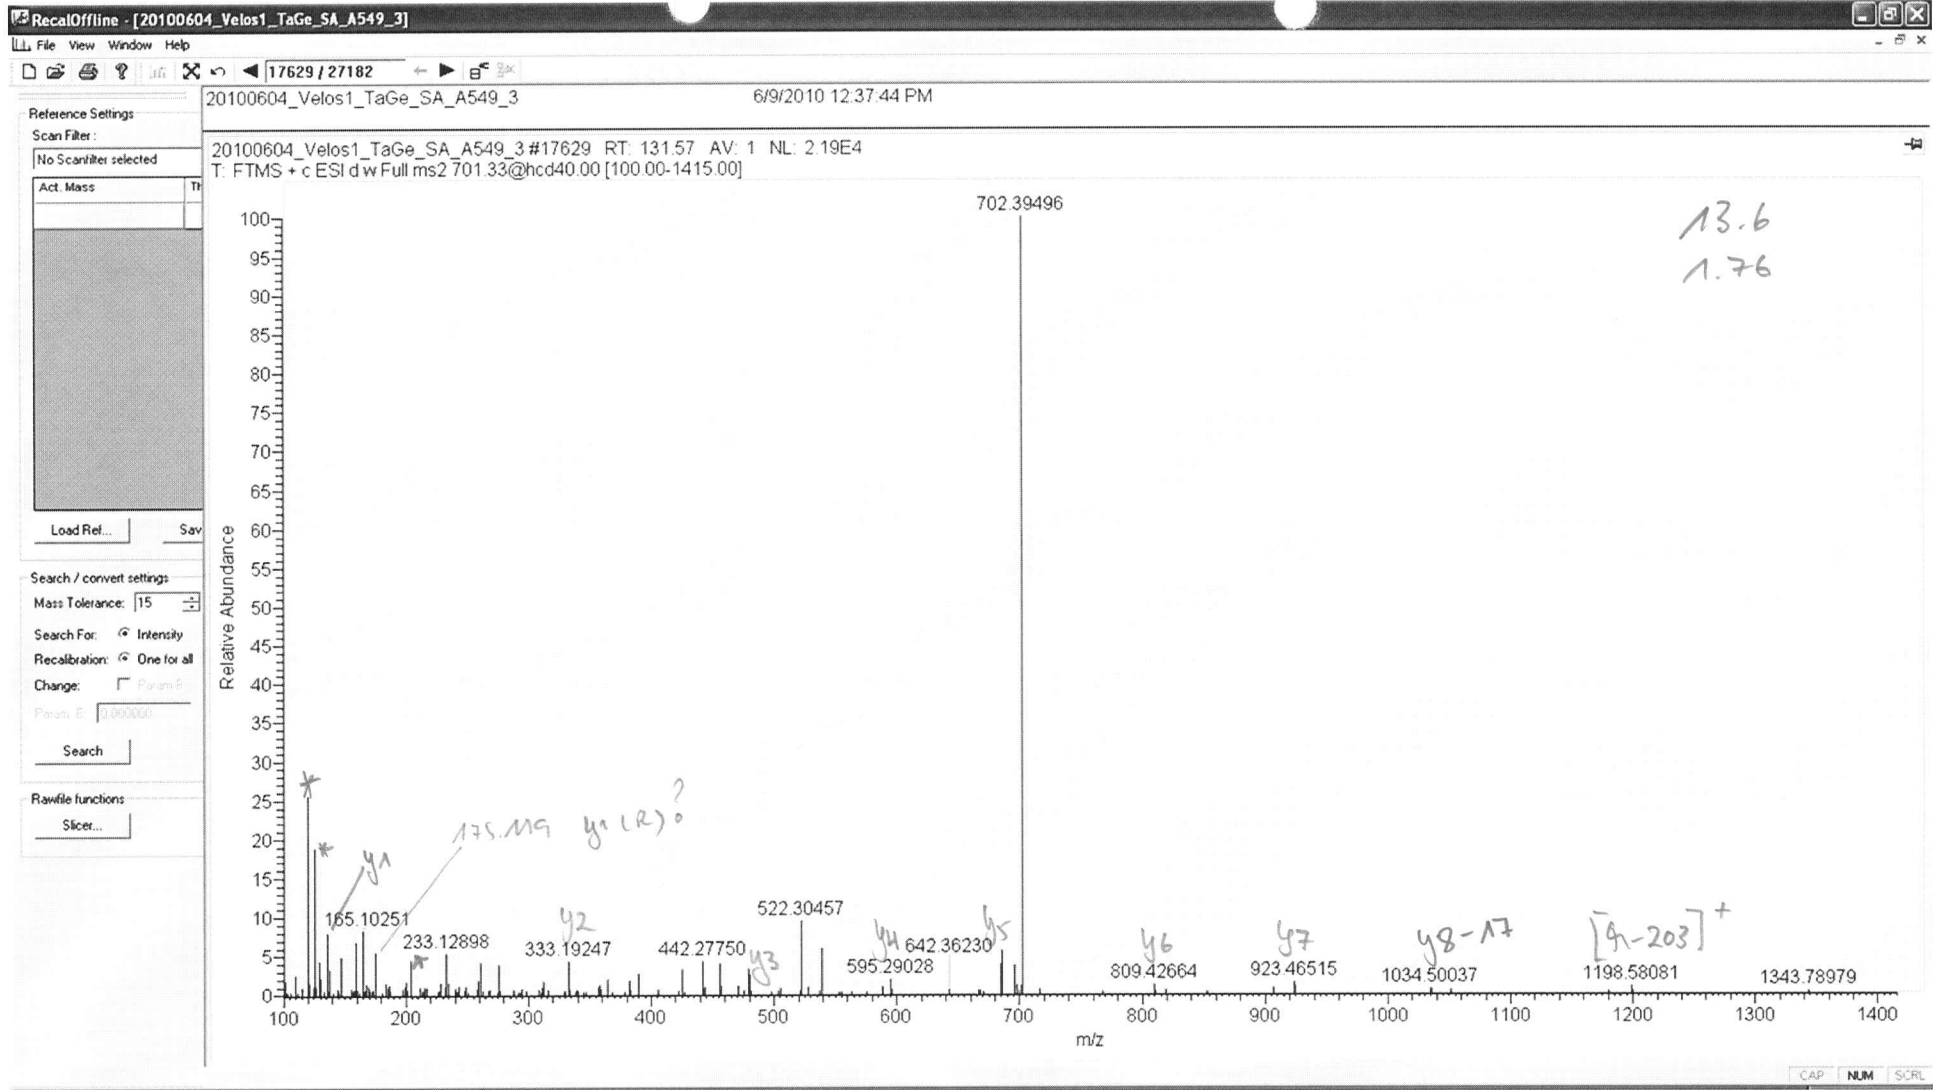

FQNI<sup>+</sup>DFWK

no site evidence;  
spectrum weak, but only one  
seq tag hit in Grasscut.



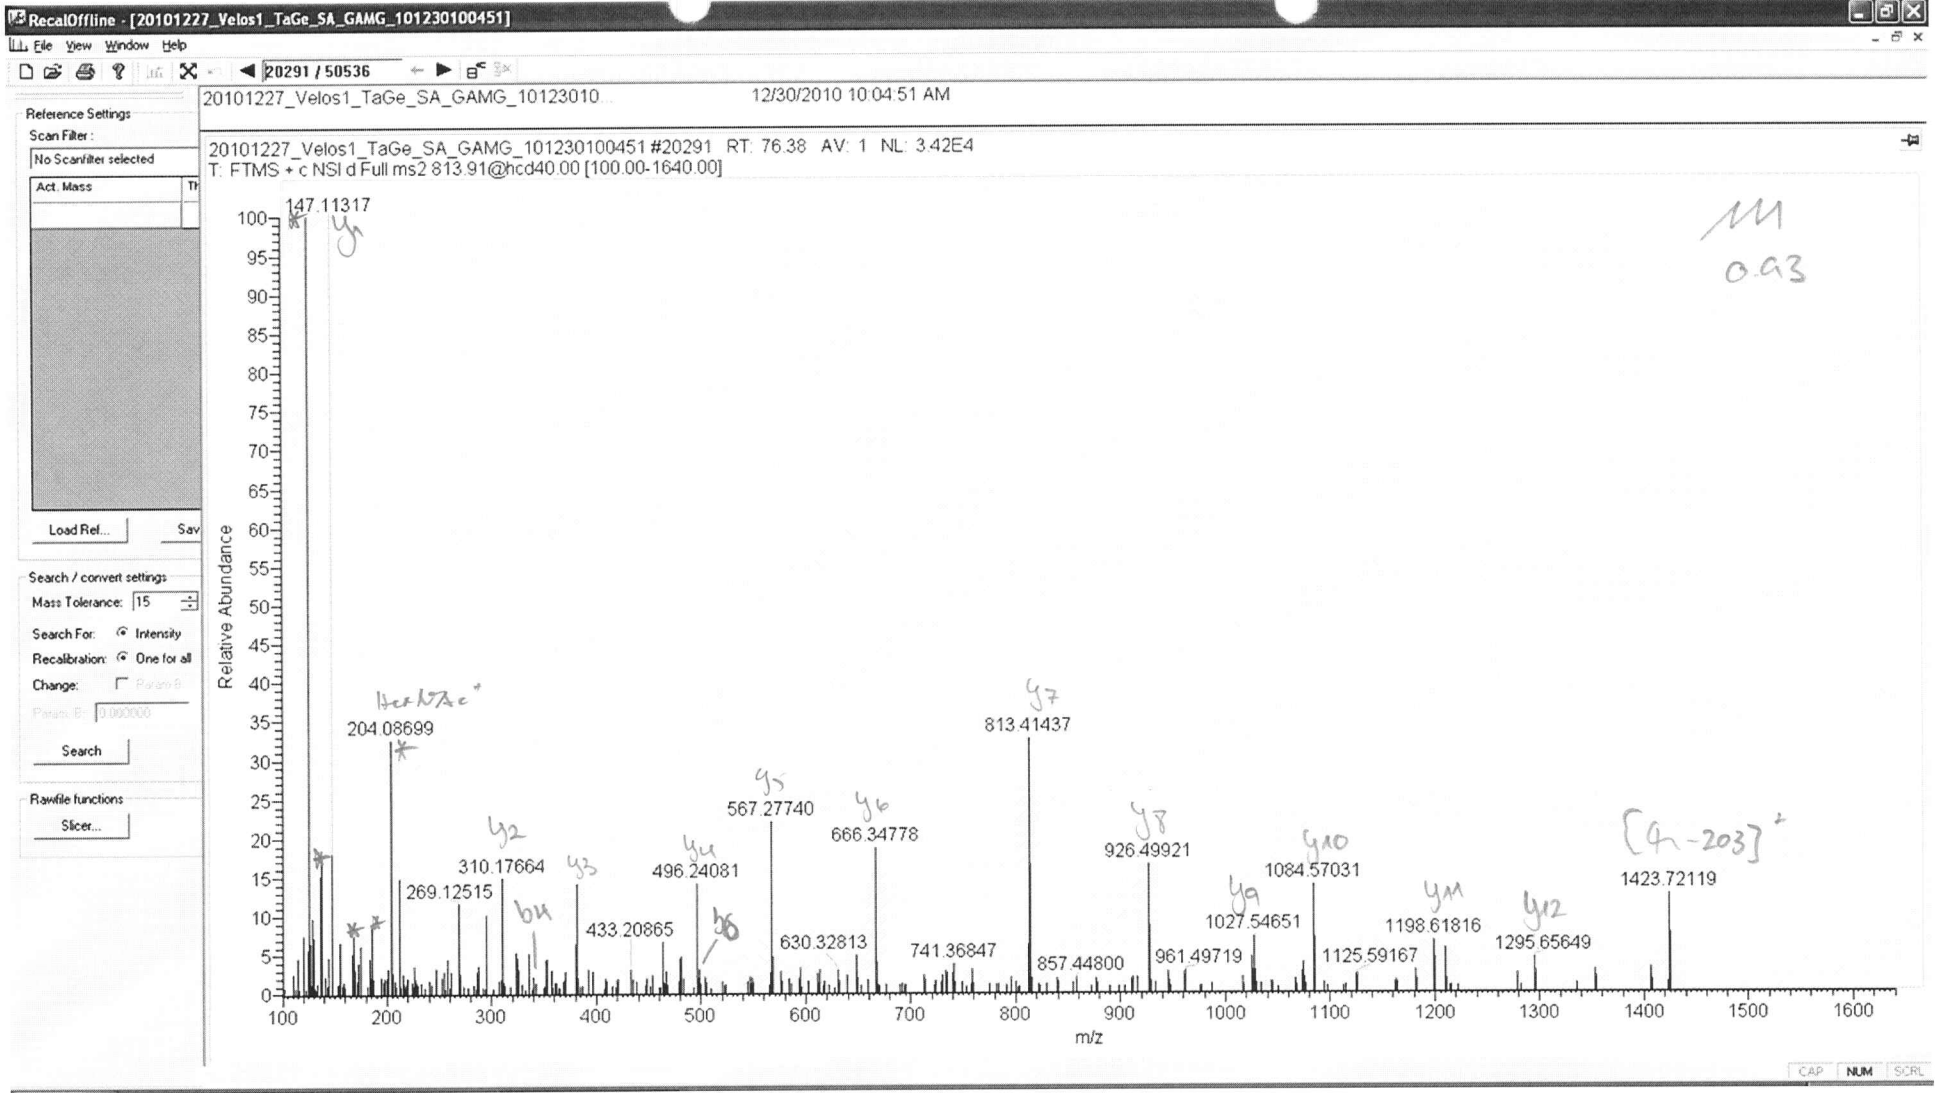

AGPNGtLFVADAYK

no site evidence

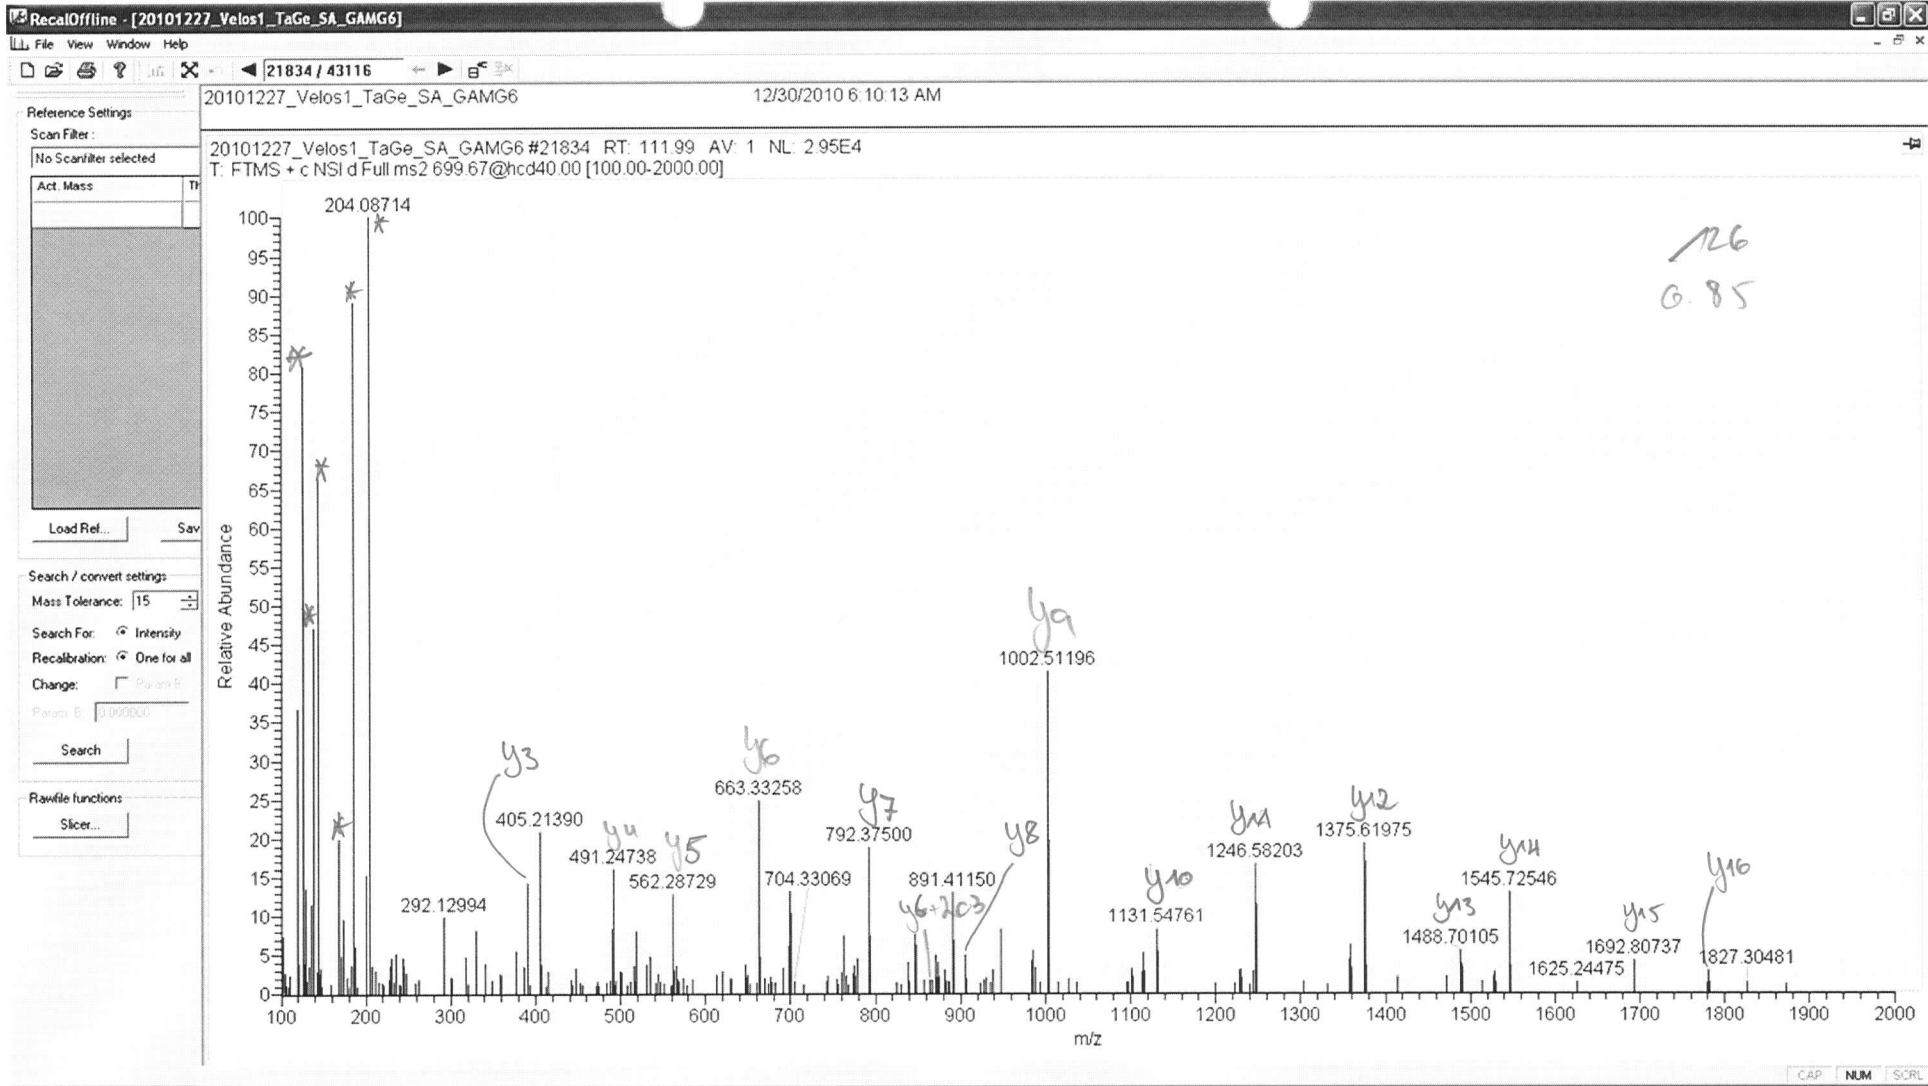

LSFGLEDEPLETATKEn

T12

Reference Settings

Scan Filter:

No Scanfilter selected

Act. Mass

Load Ref...

Sav

Search / convert settings

Mass Tolerance: 15

Search For: Intensity

Recalibration: One for all

Change: Percent

Param E: 0.000000

Search

Rawfile functions

Slicer...

20100723\_Velos1\_TaGe\_SA\_Gamg\_1 #4979 RT: 37.10 AV: 1 NL: 9.80E5  
T: FTMS + c NSI d w Full ms2 477.25@hcd40.00 [100.00-1445.00]

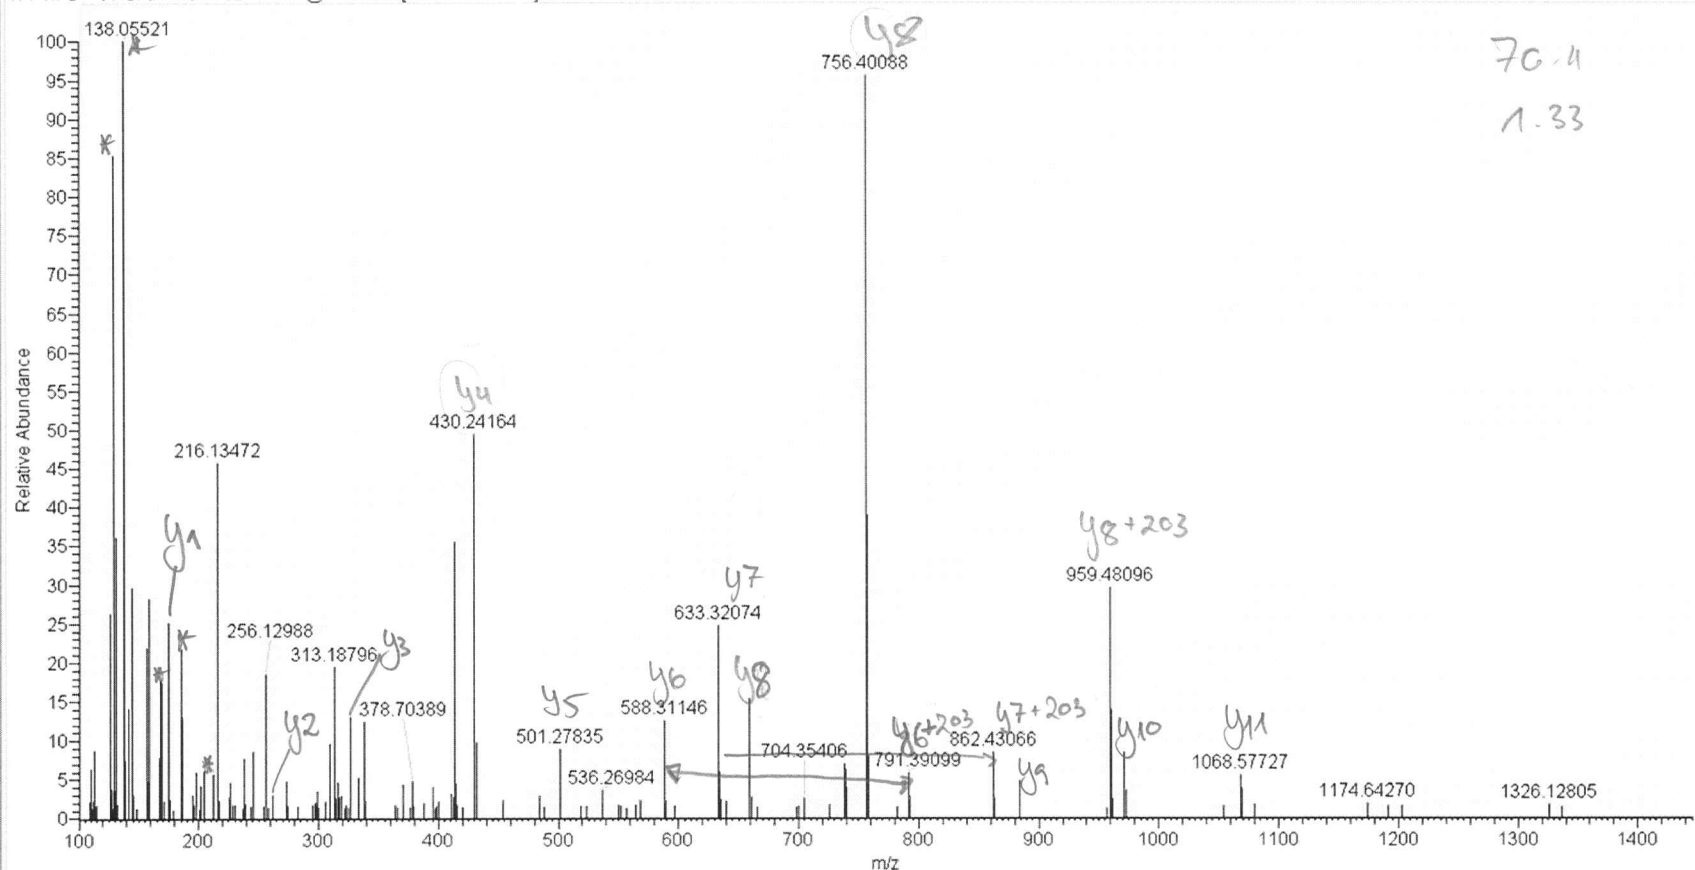

70.4  
1.33

ASPSKPASAPAsR

S8



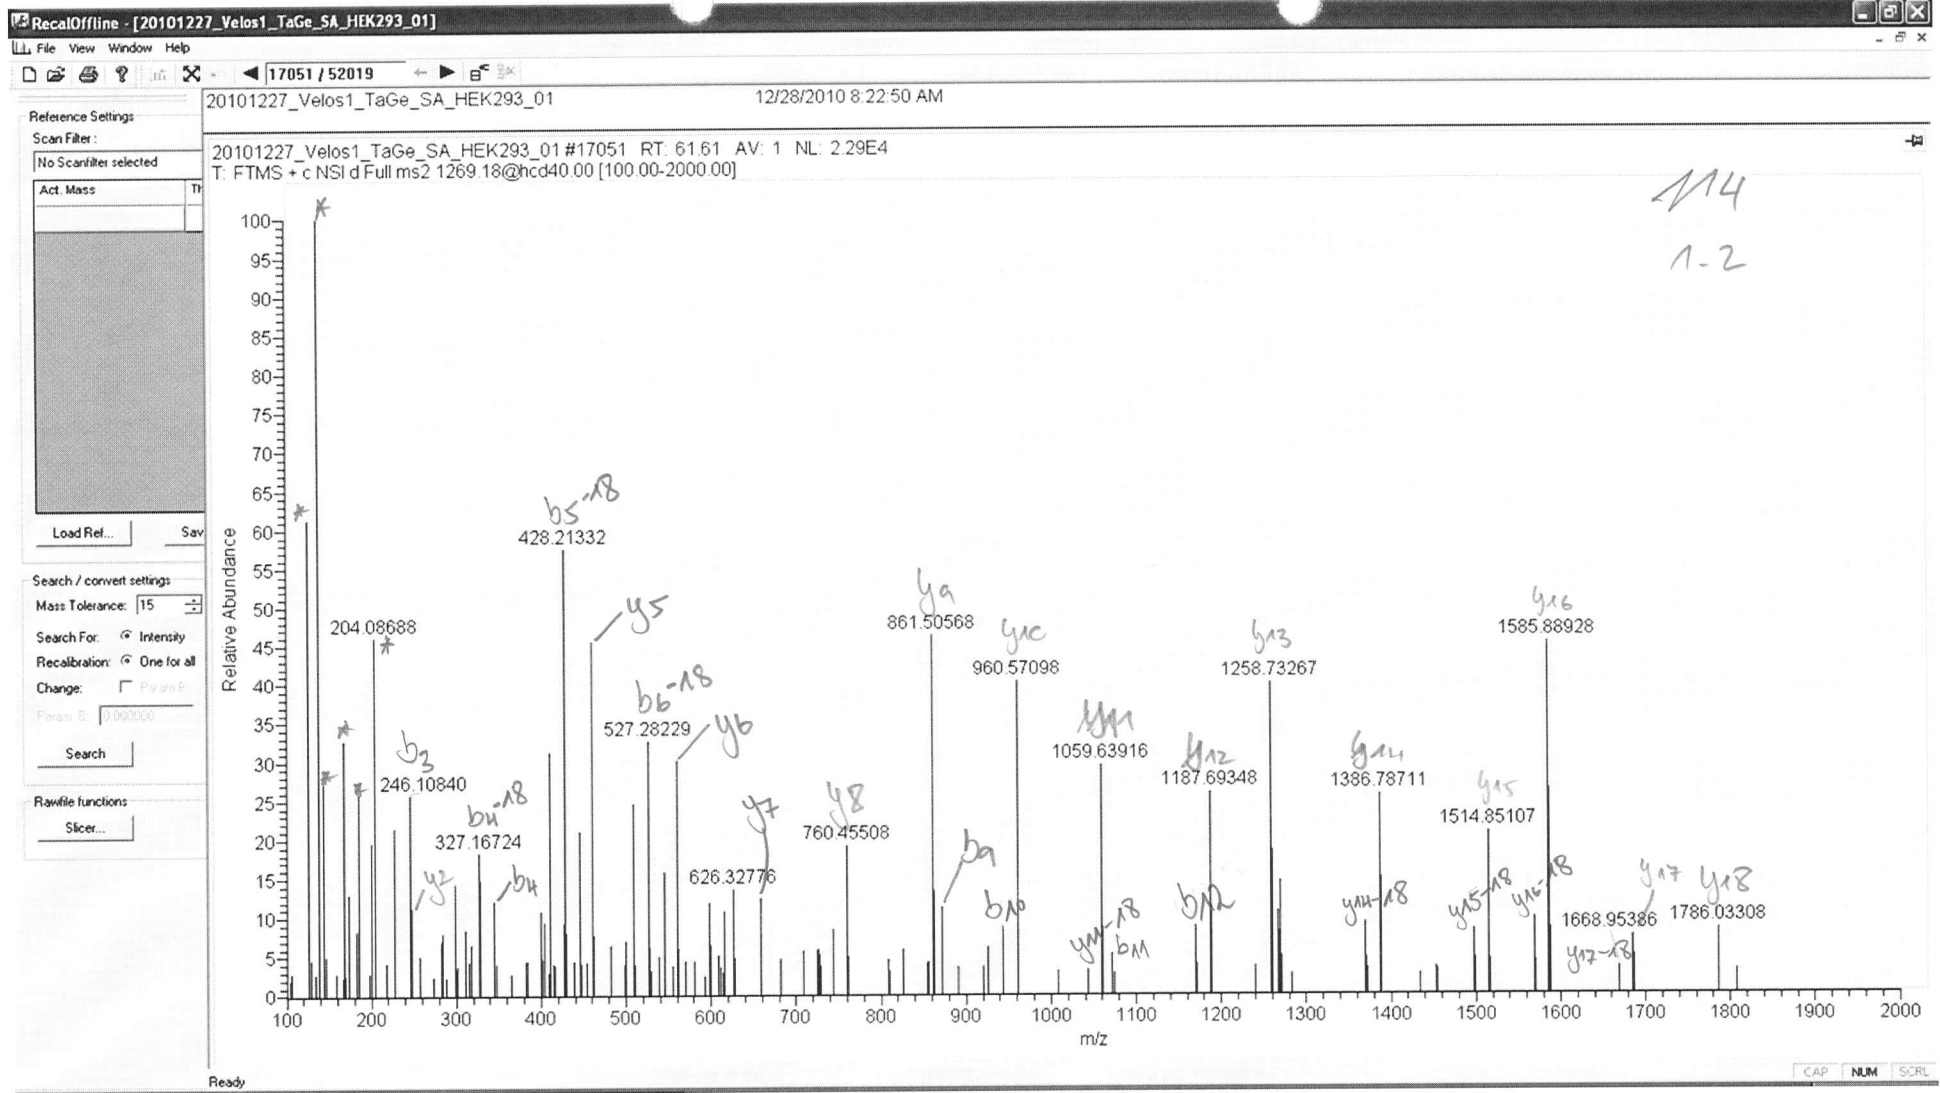

114  
1-2

SGTVTVAQQAQVVTtVVGGVtK

no site  
evidence

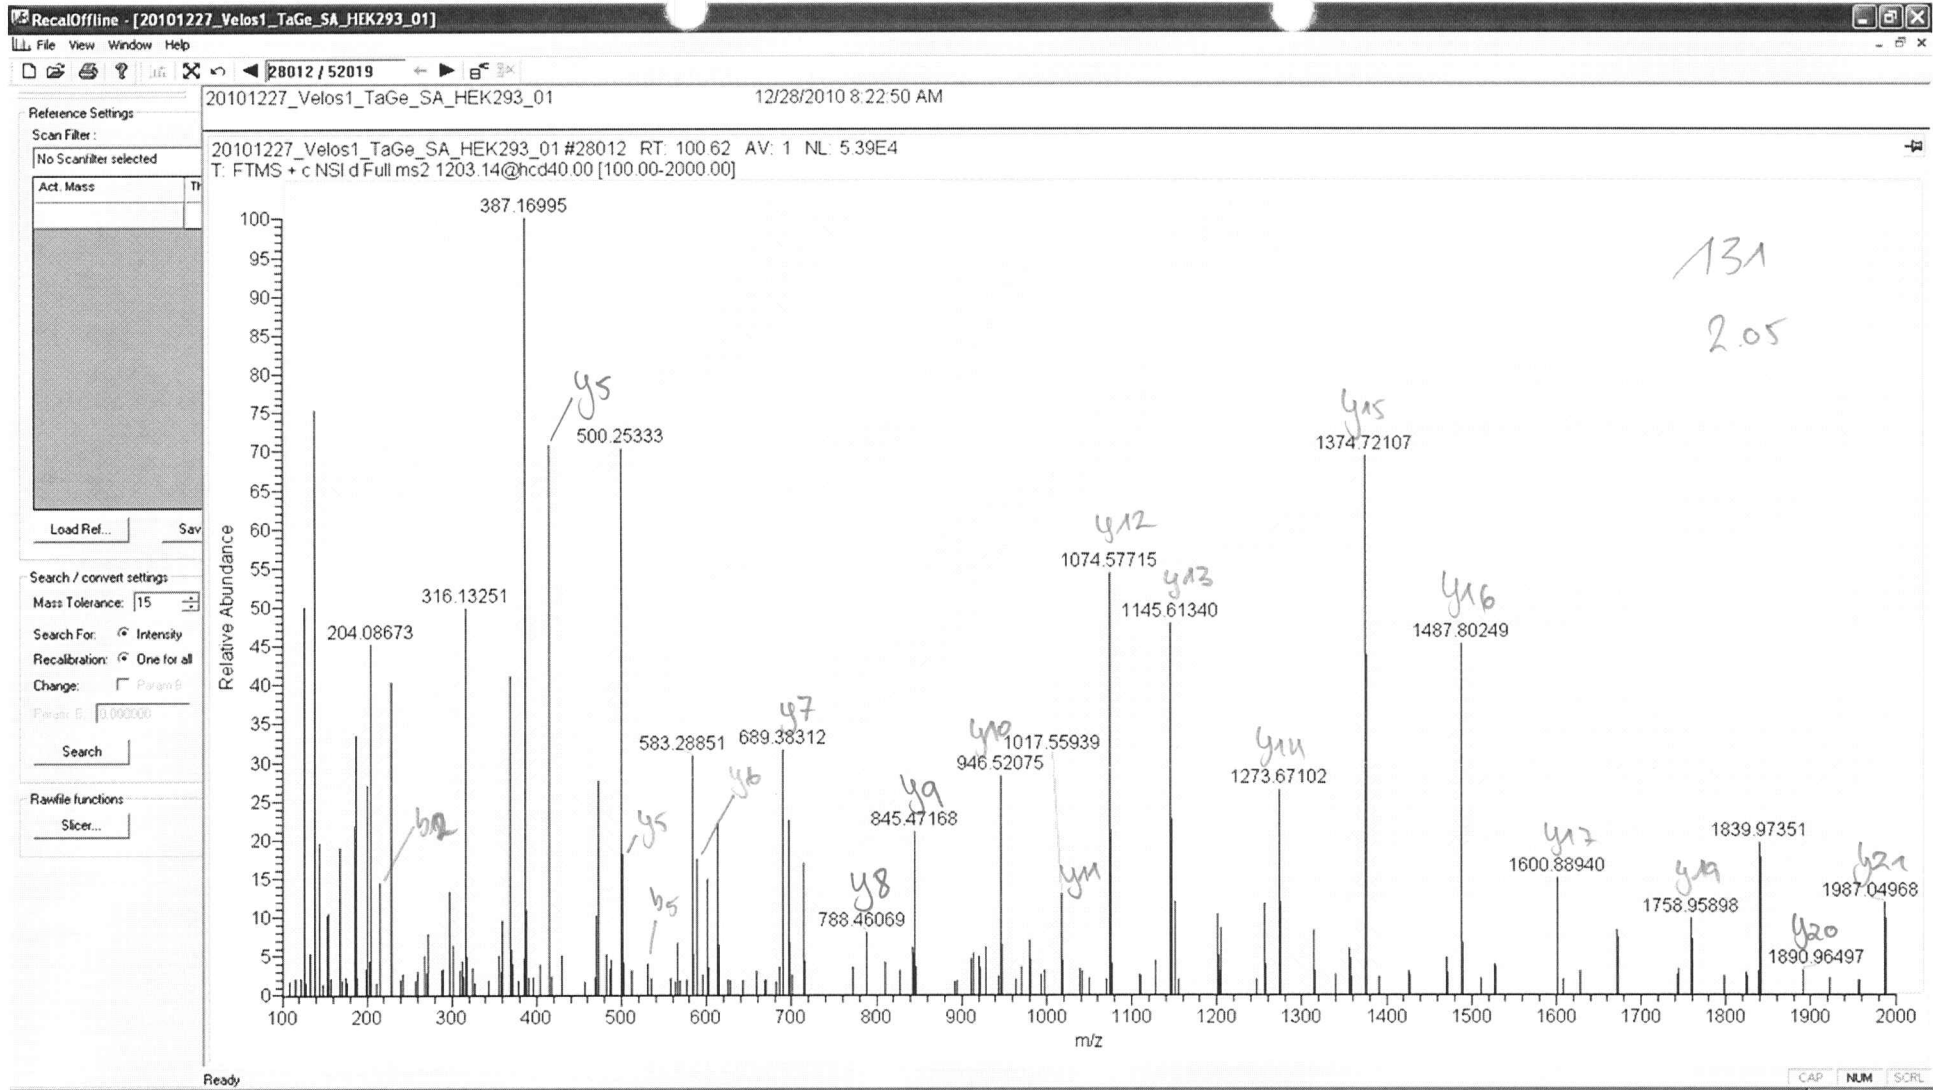

TIPMSAITQAGATGVTSsPGIK

no site  
evidence

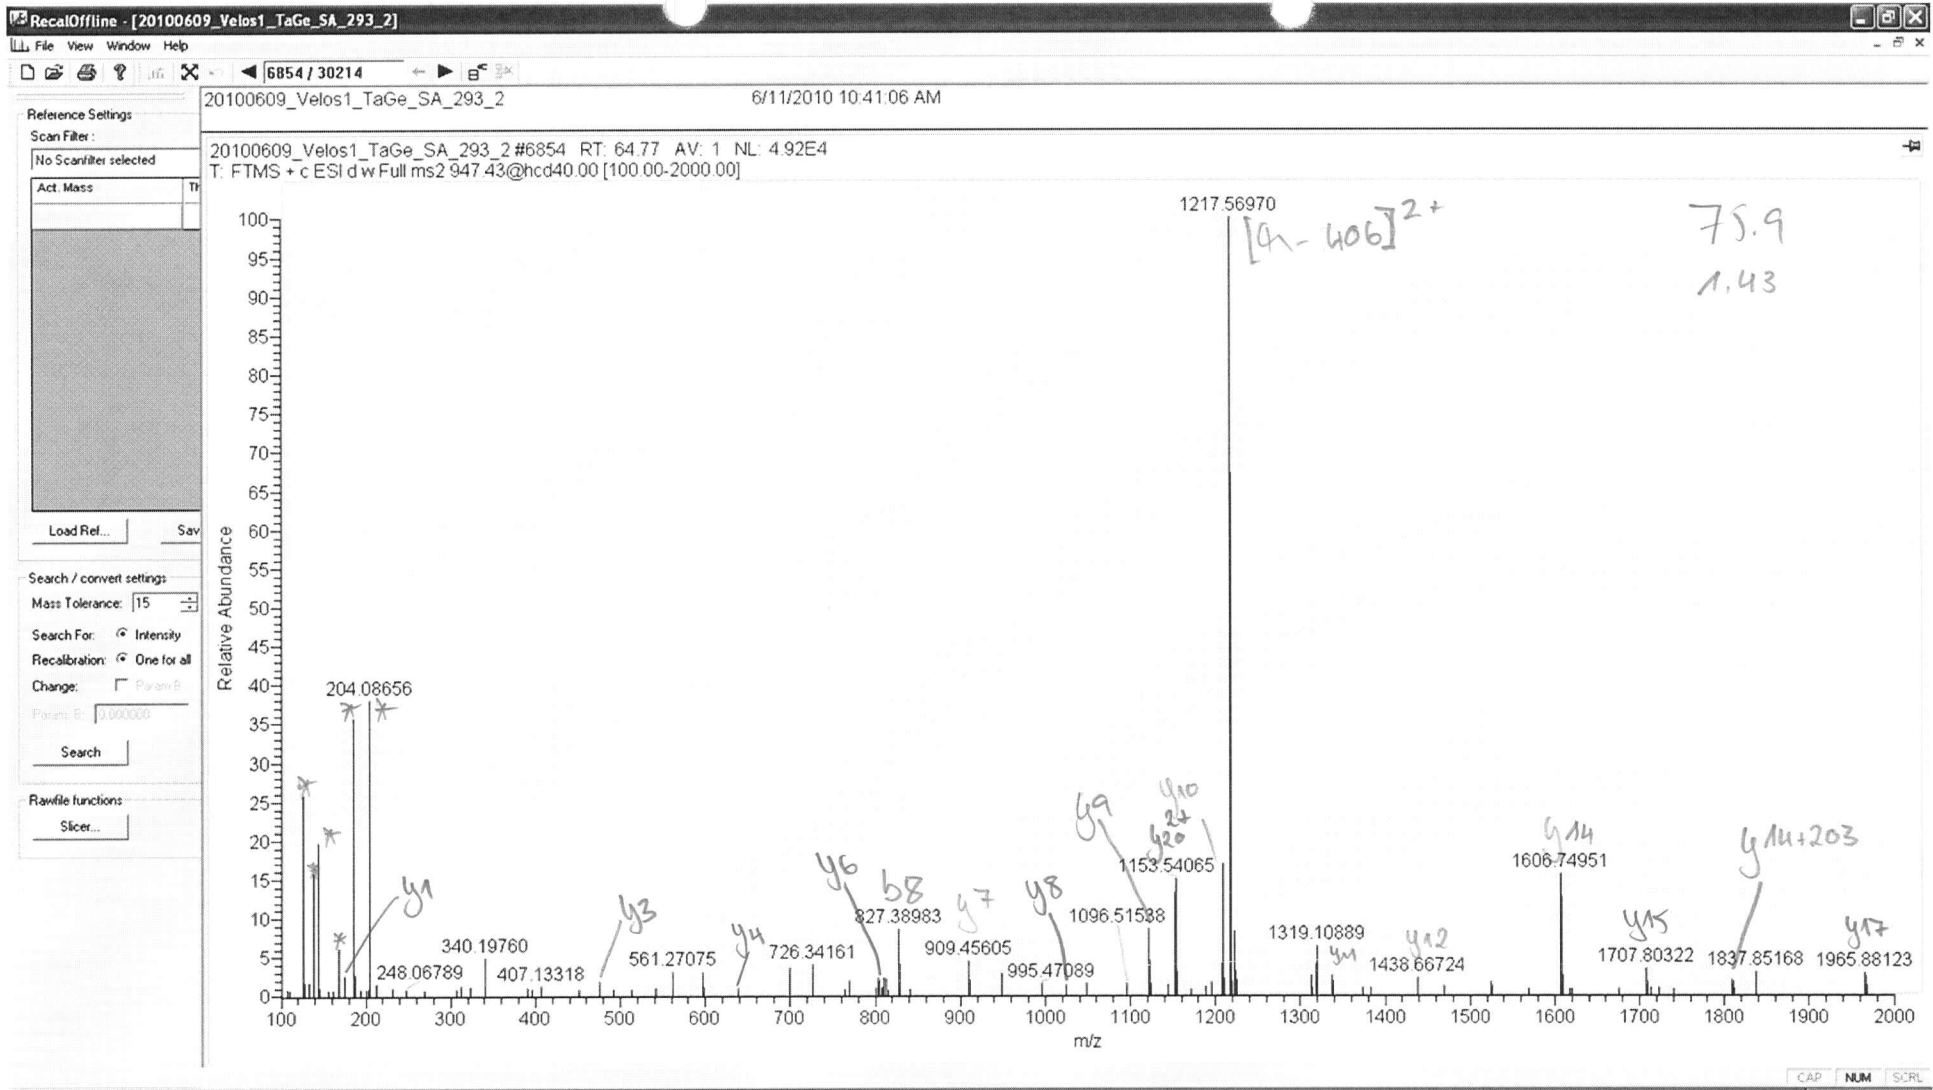

GAPNKEET**P**AT**E**s**P**D**t**GLY**Y**HR

b8 y14 y10

no site evidence





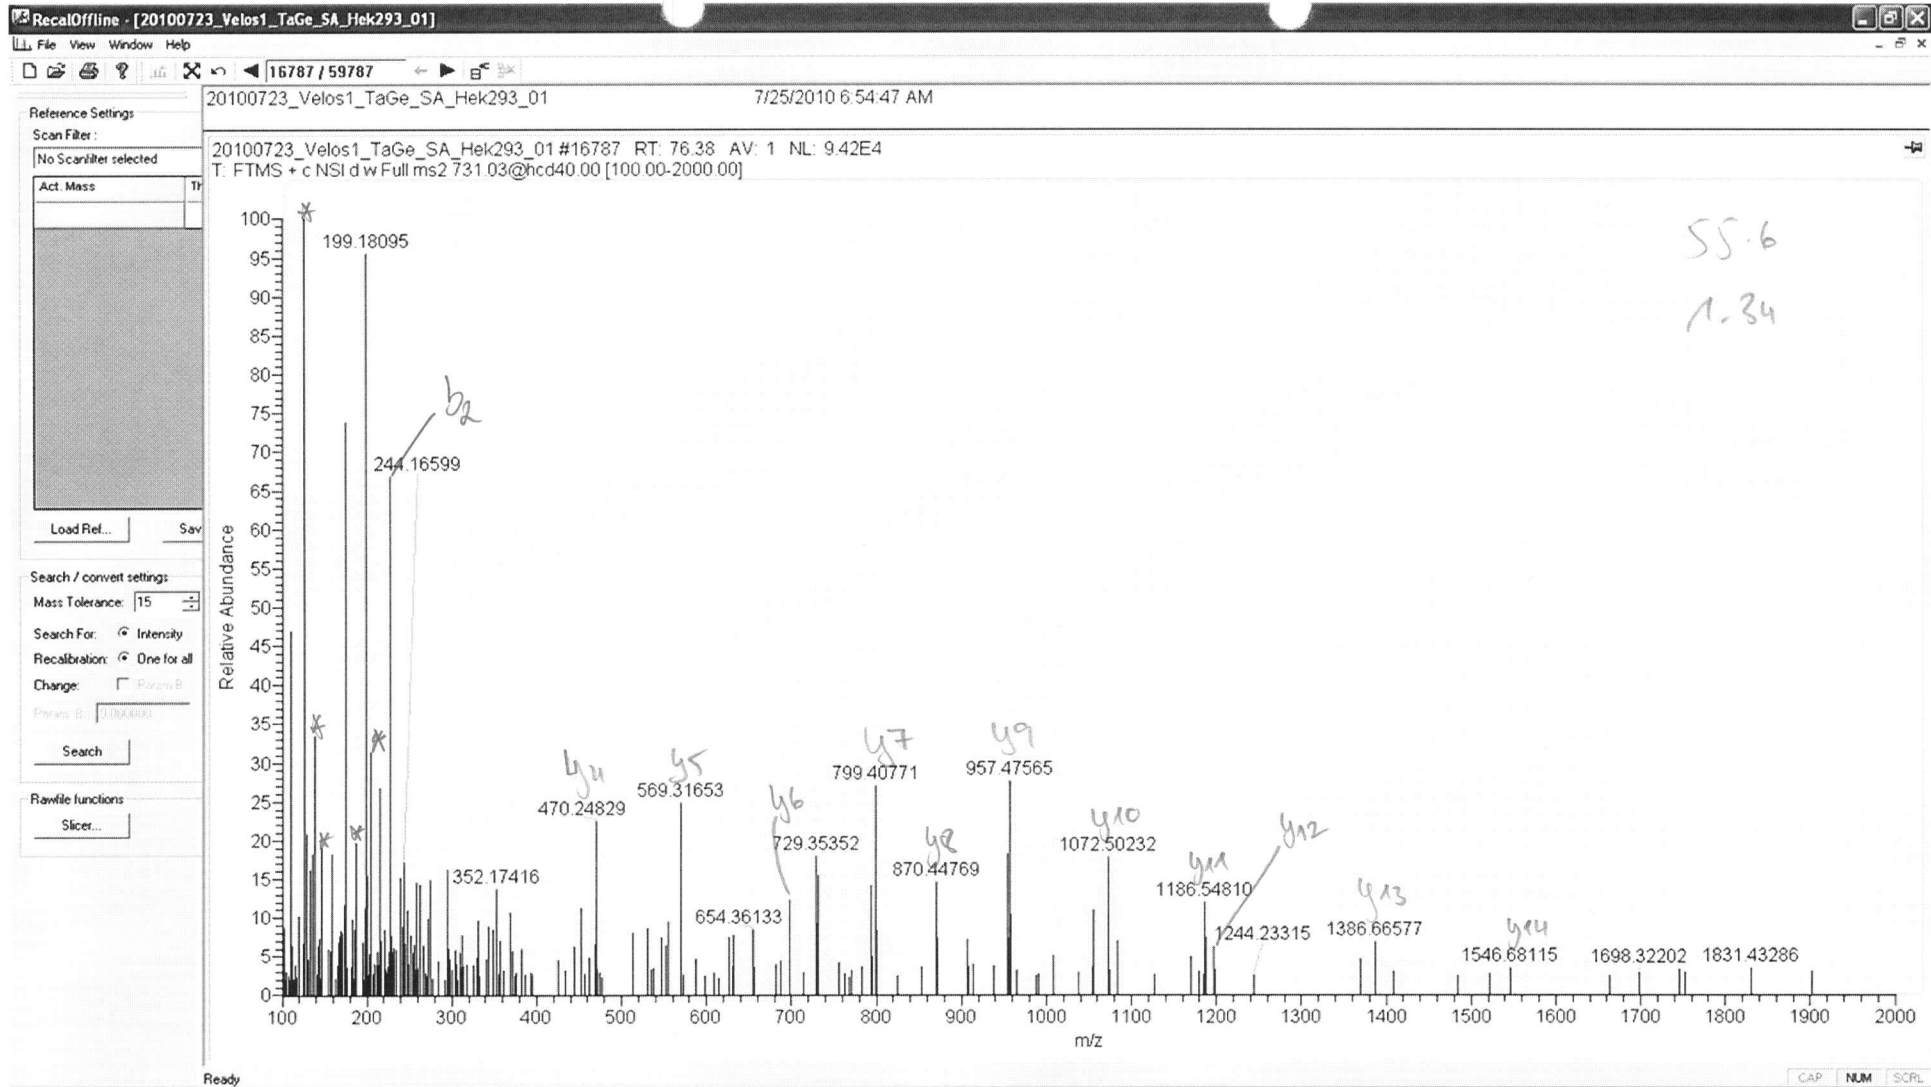

ILLTcSLNDSATEVtGHR

no site evidence

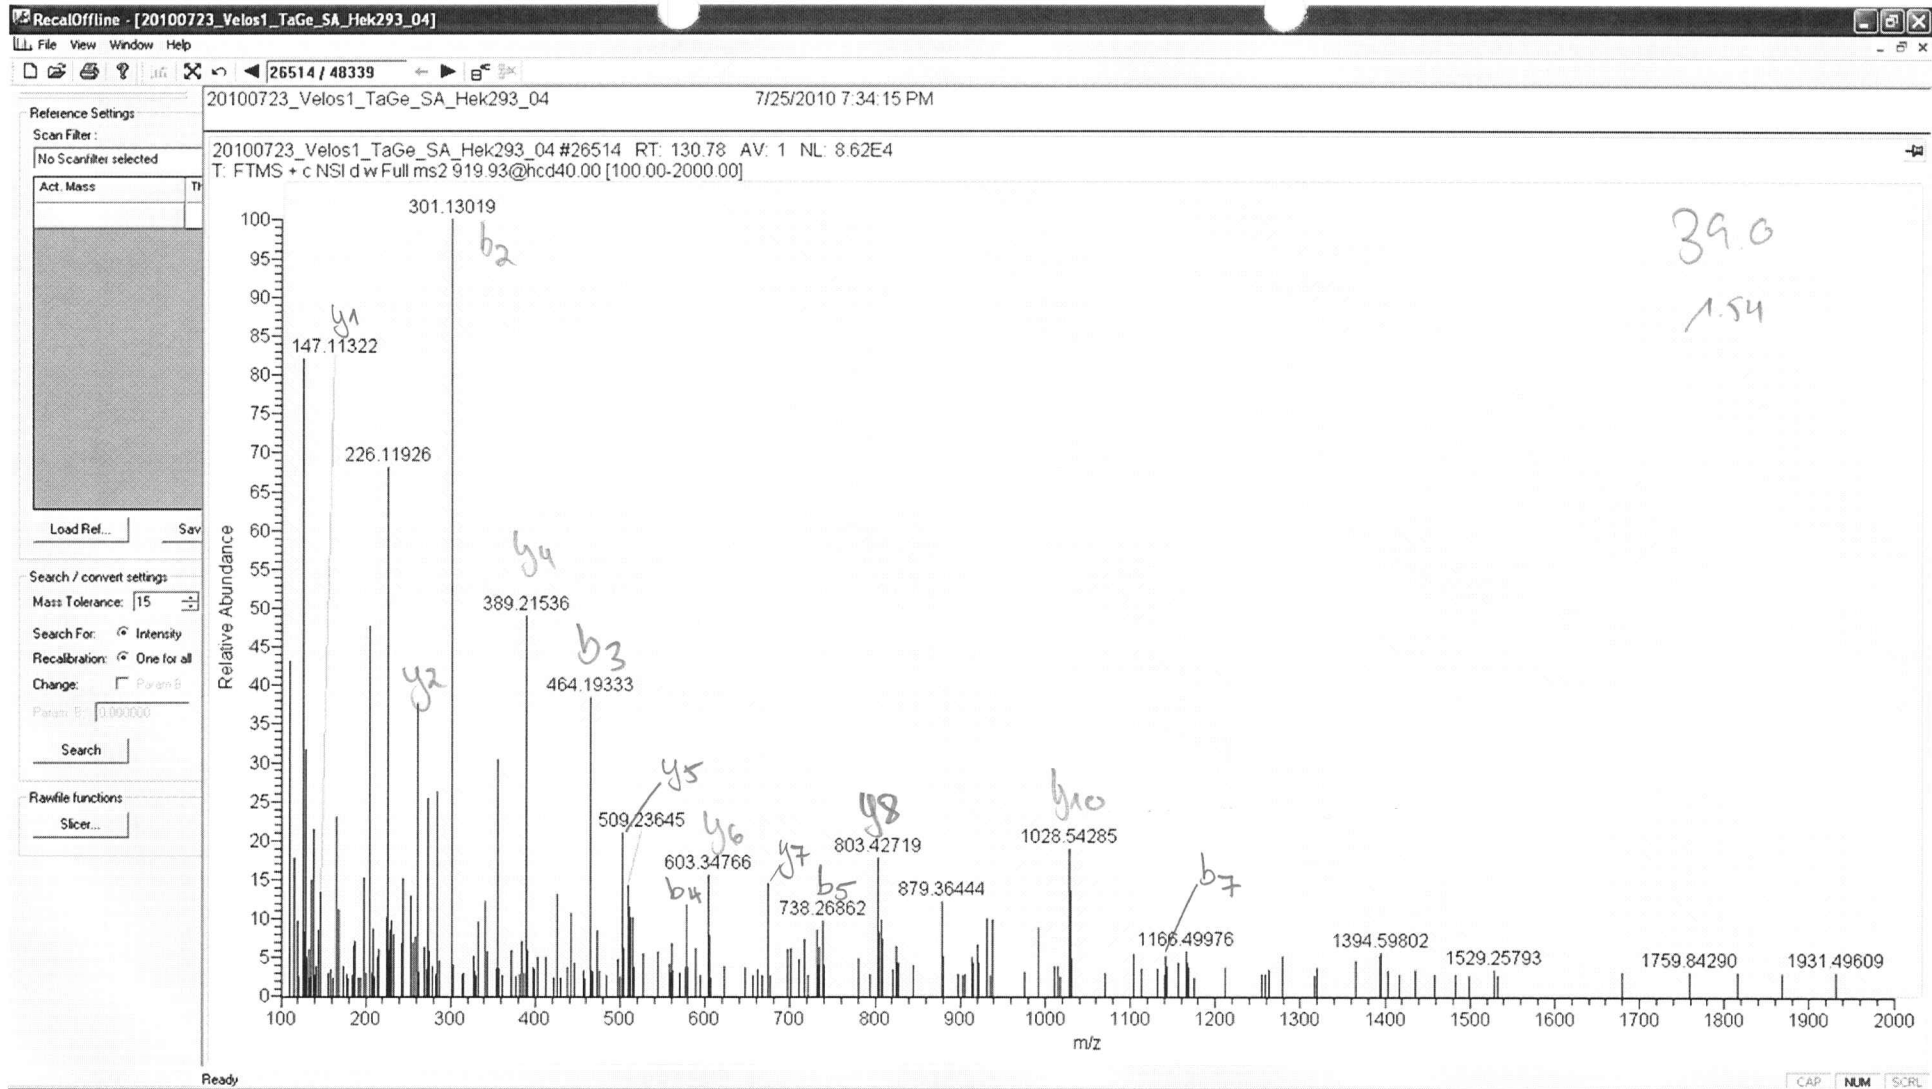

YHYNcsLLDGTQLFTSHDYGAPQEATLGANK

no site evidence



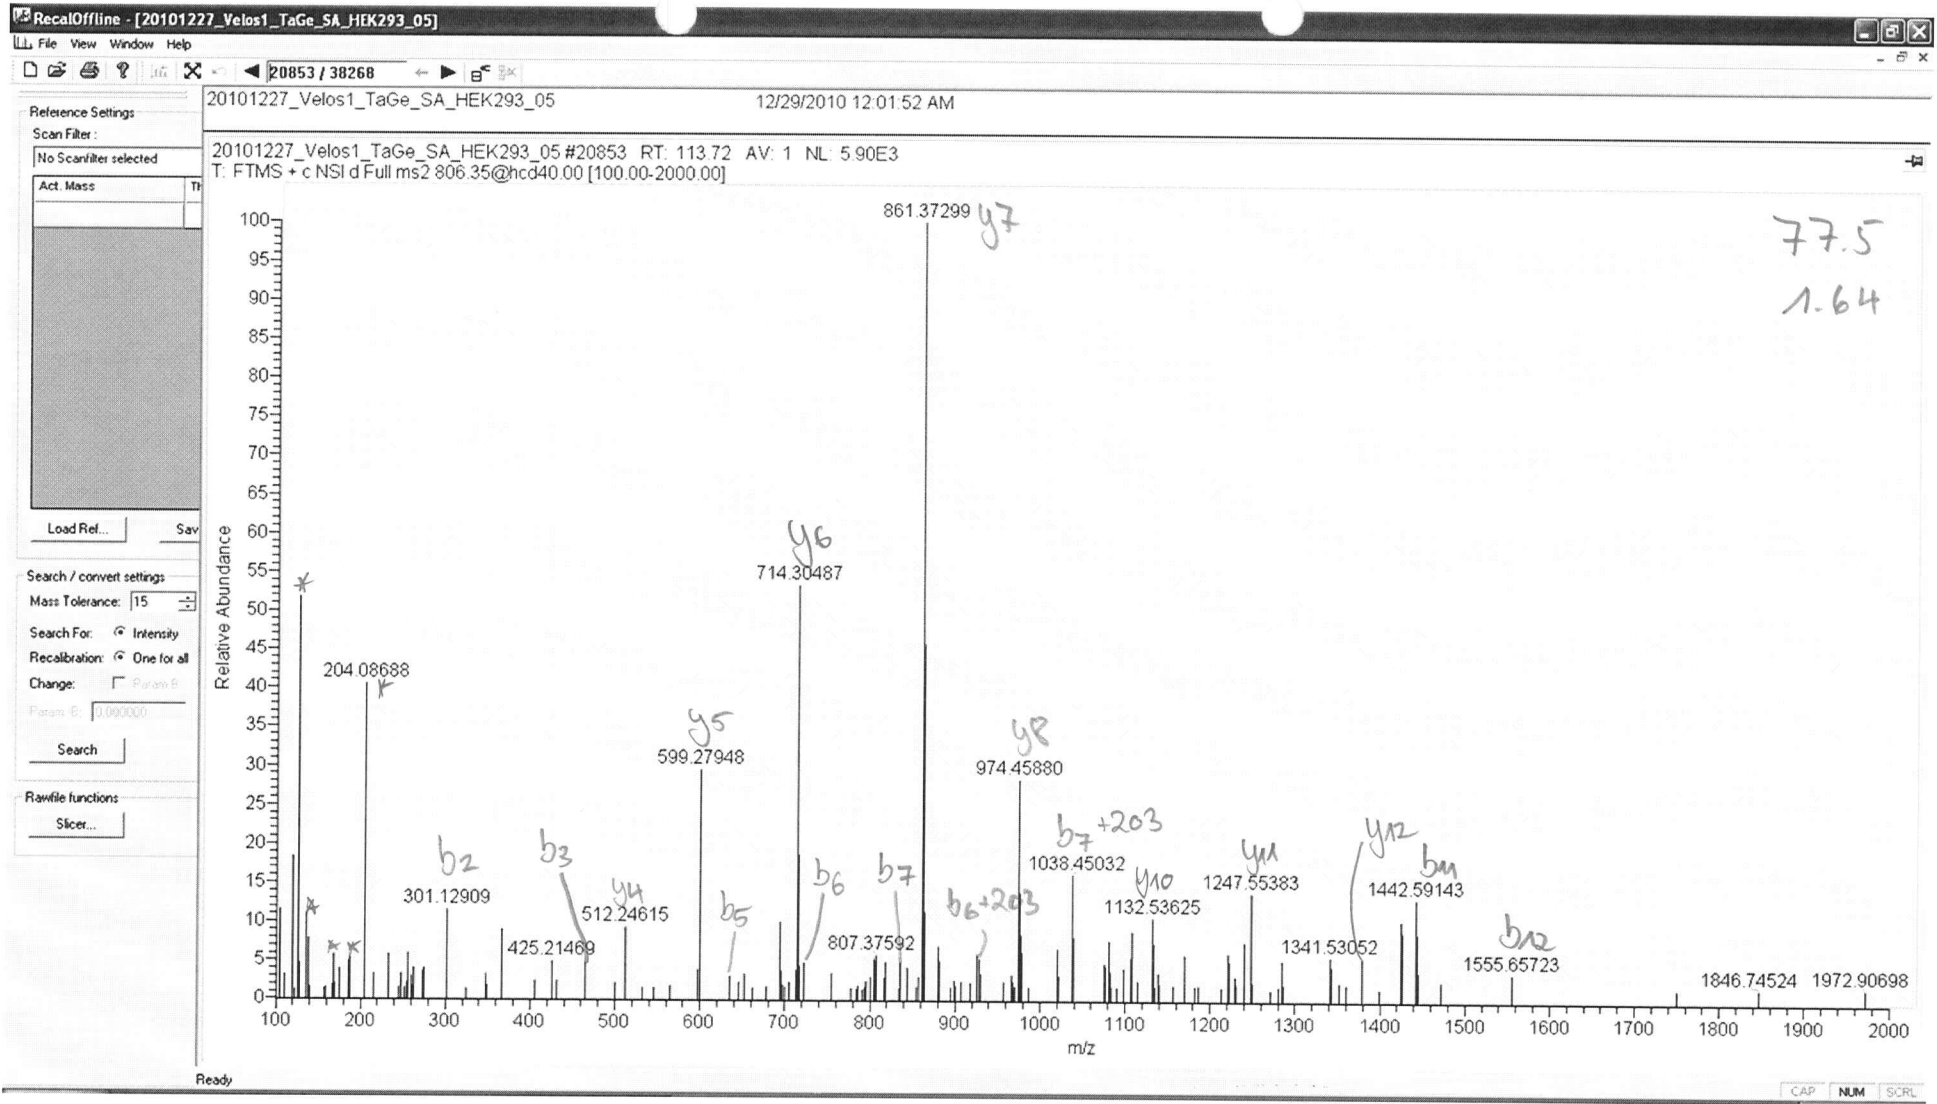

YHYNGsLMDGTLFDSSYSR

b2 b6 b7

N4 or S6

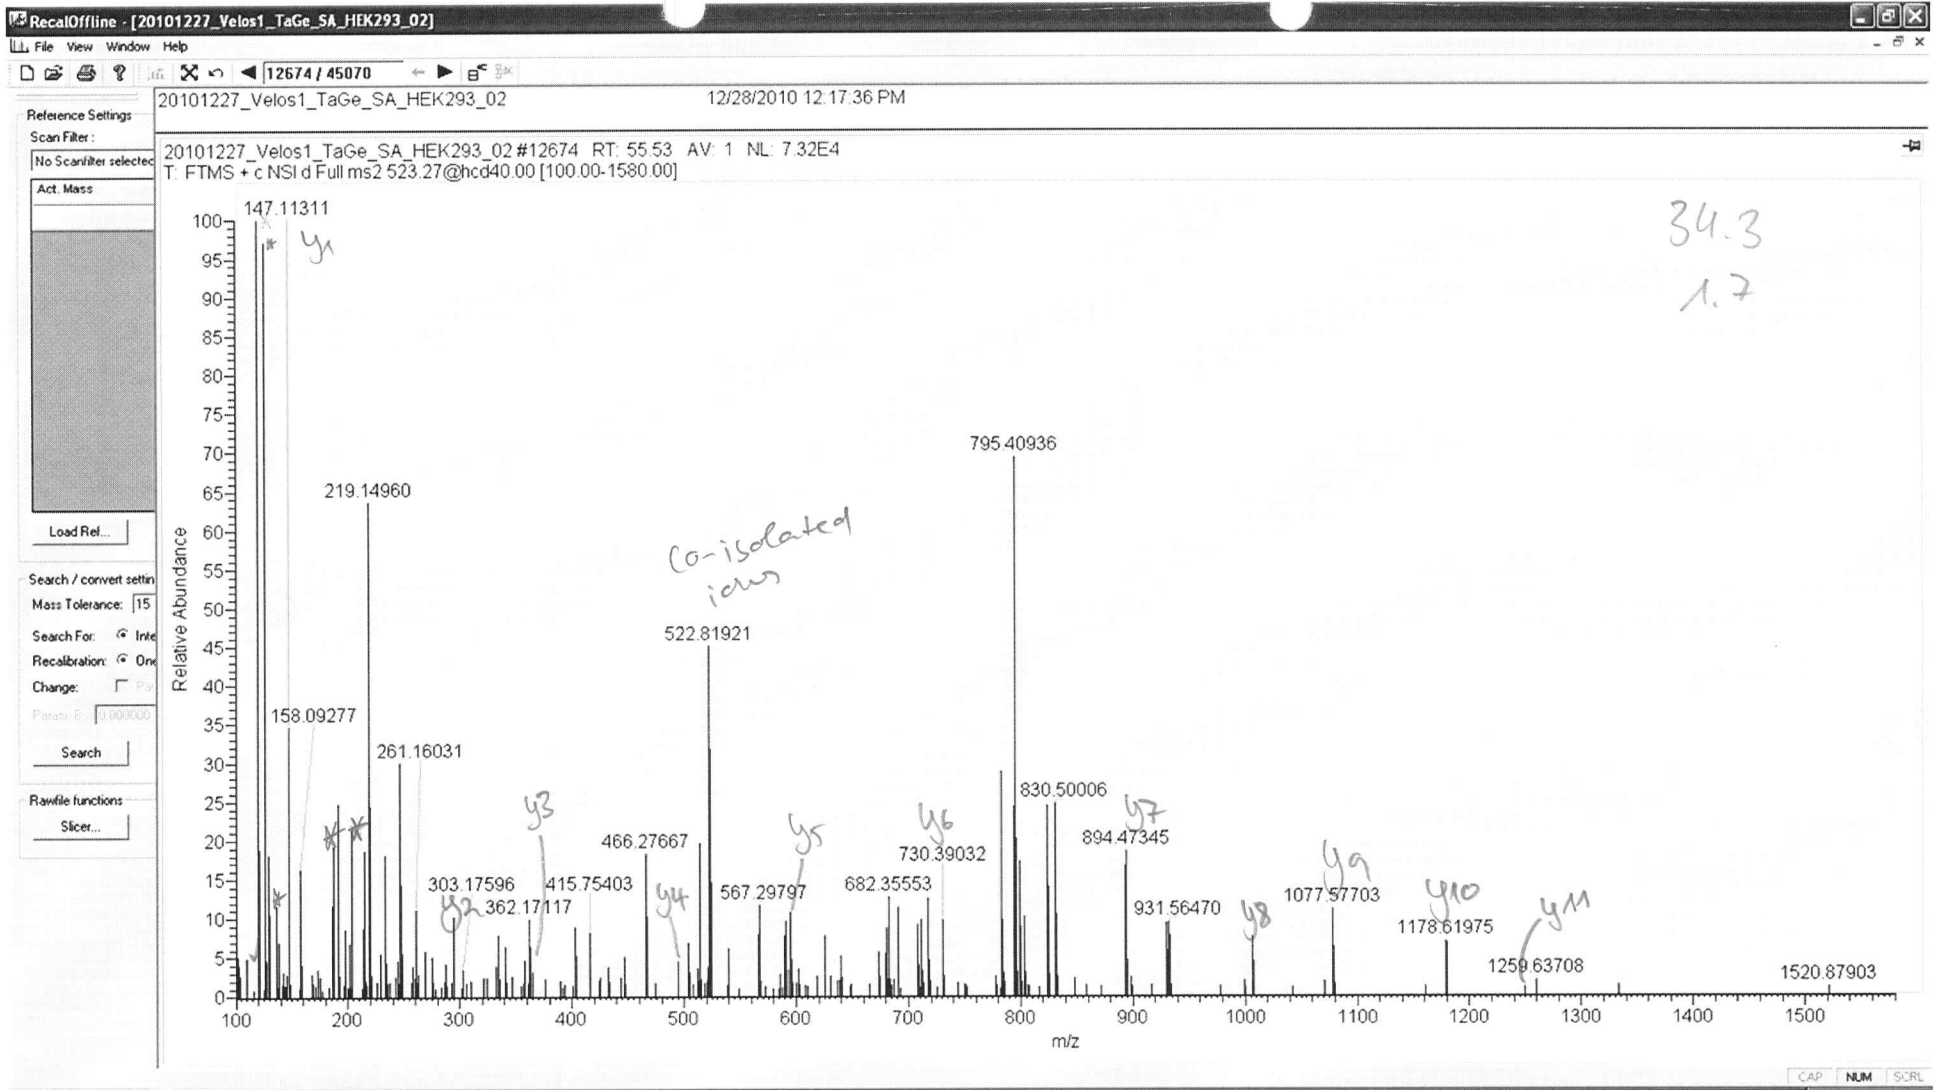

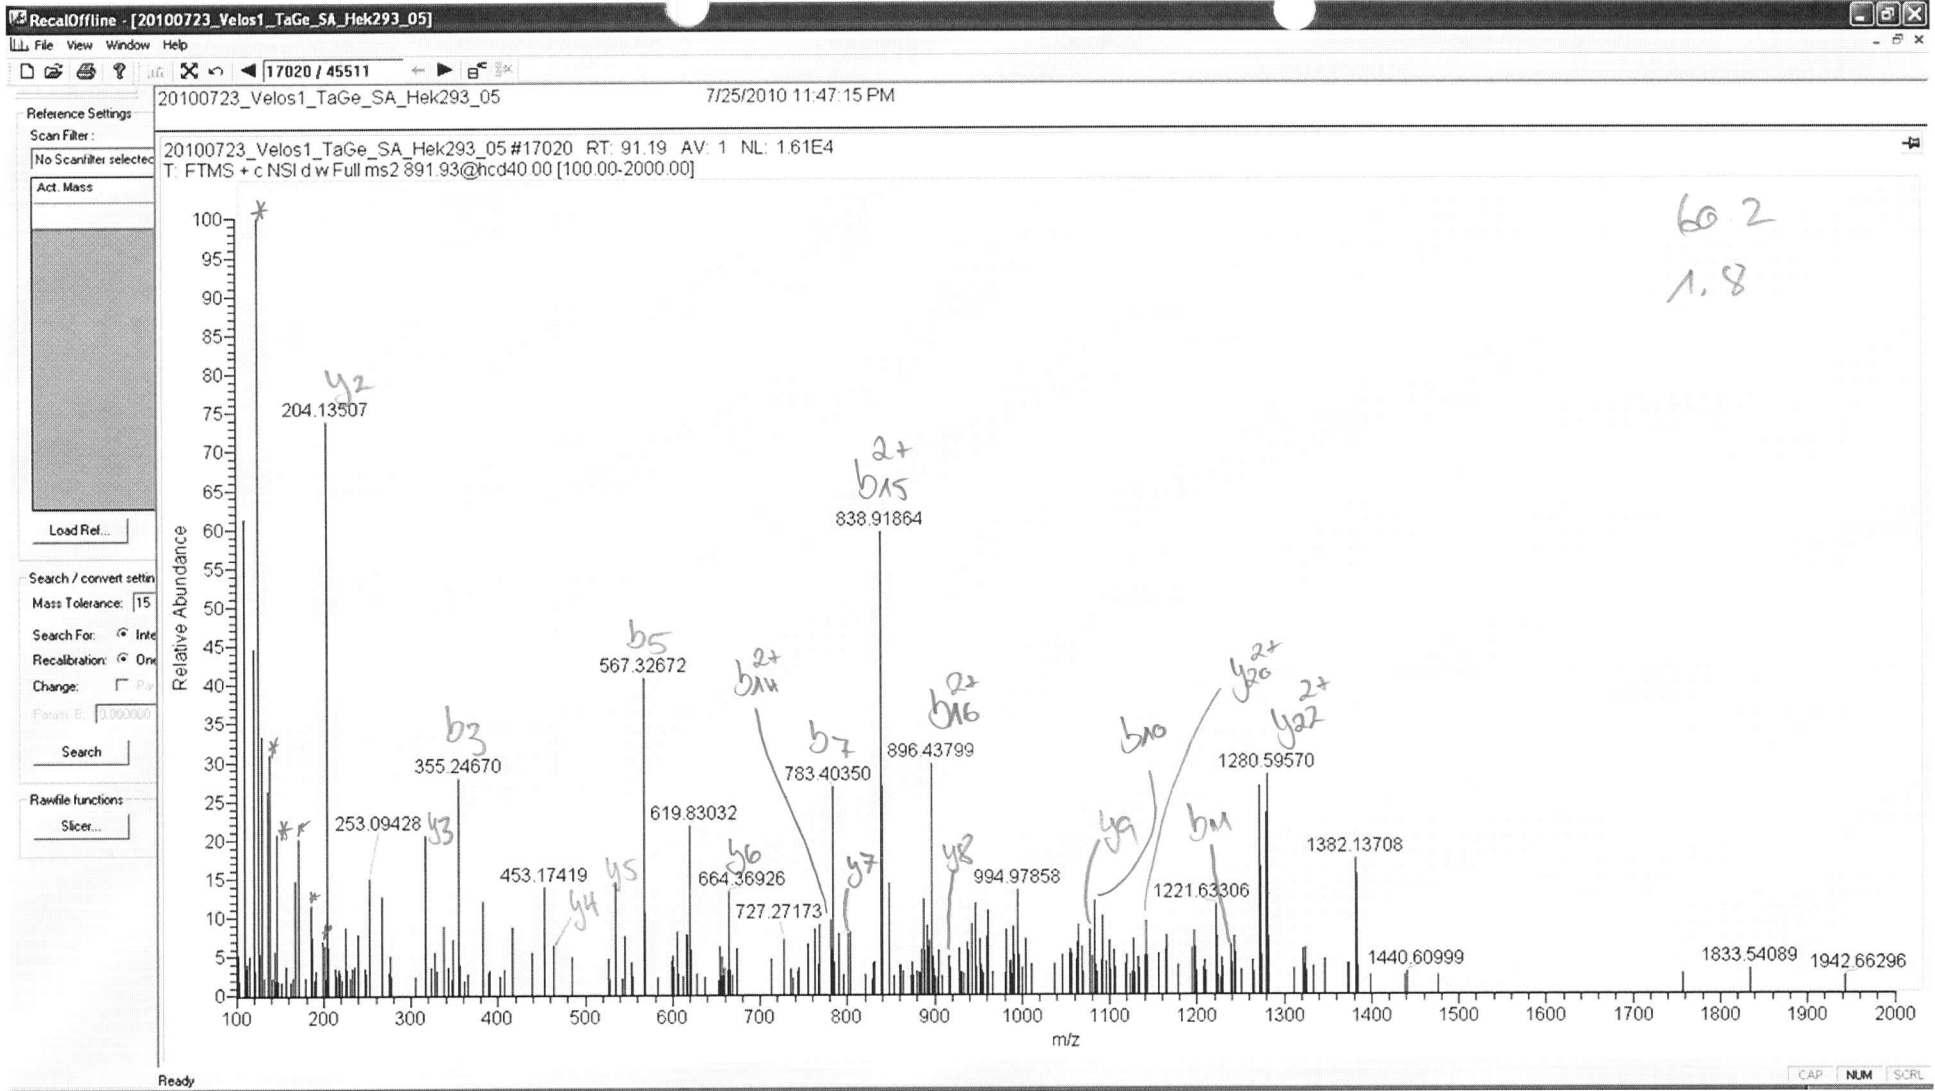

VVRPDSELGERPPEDNQsFQYDHEAFLGK

b3 b5 b7

no site  
evidence

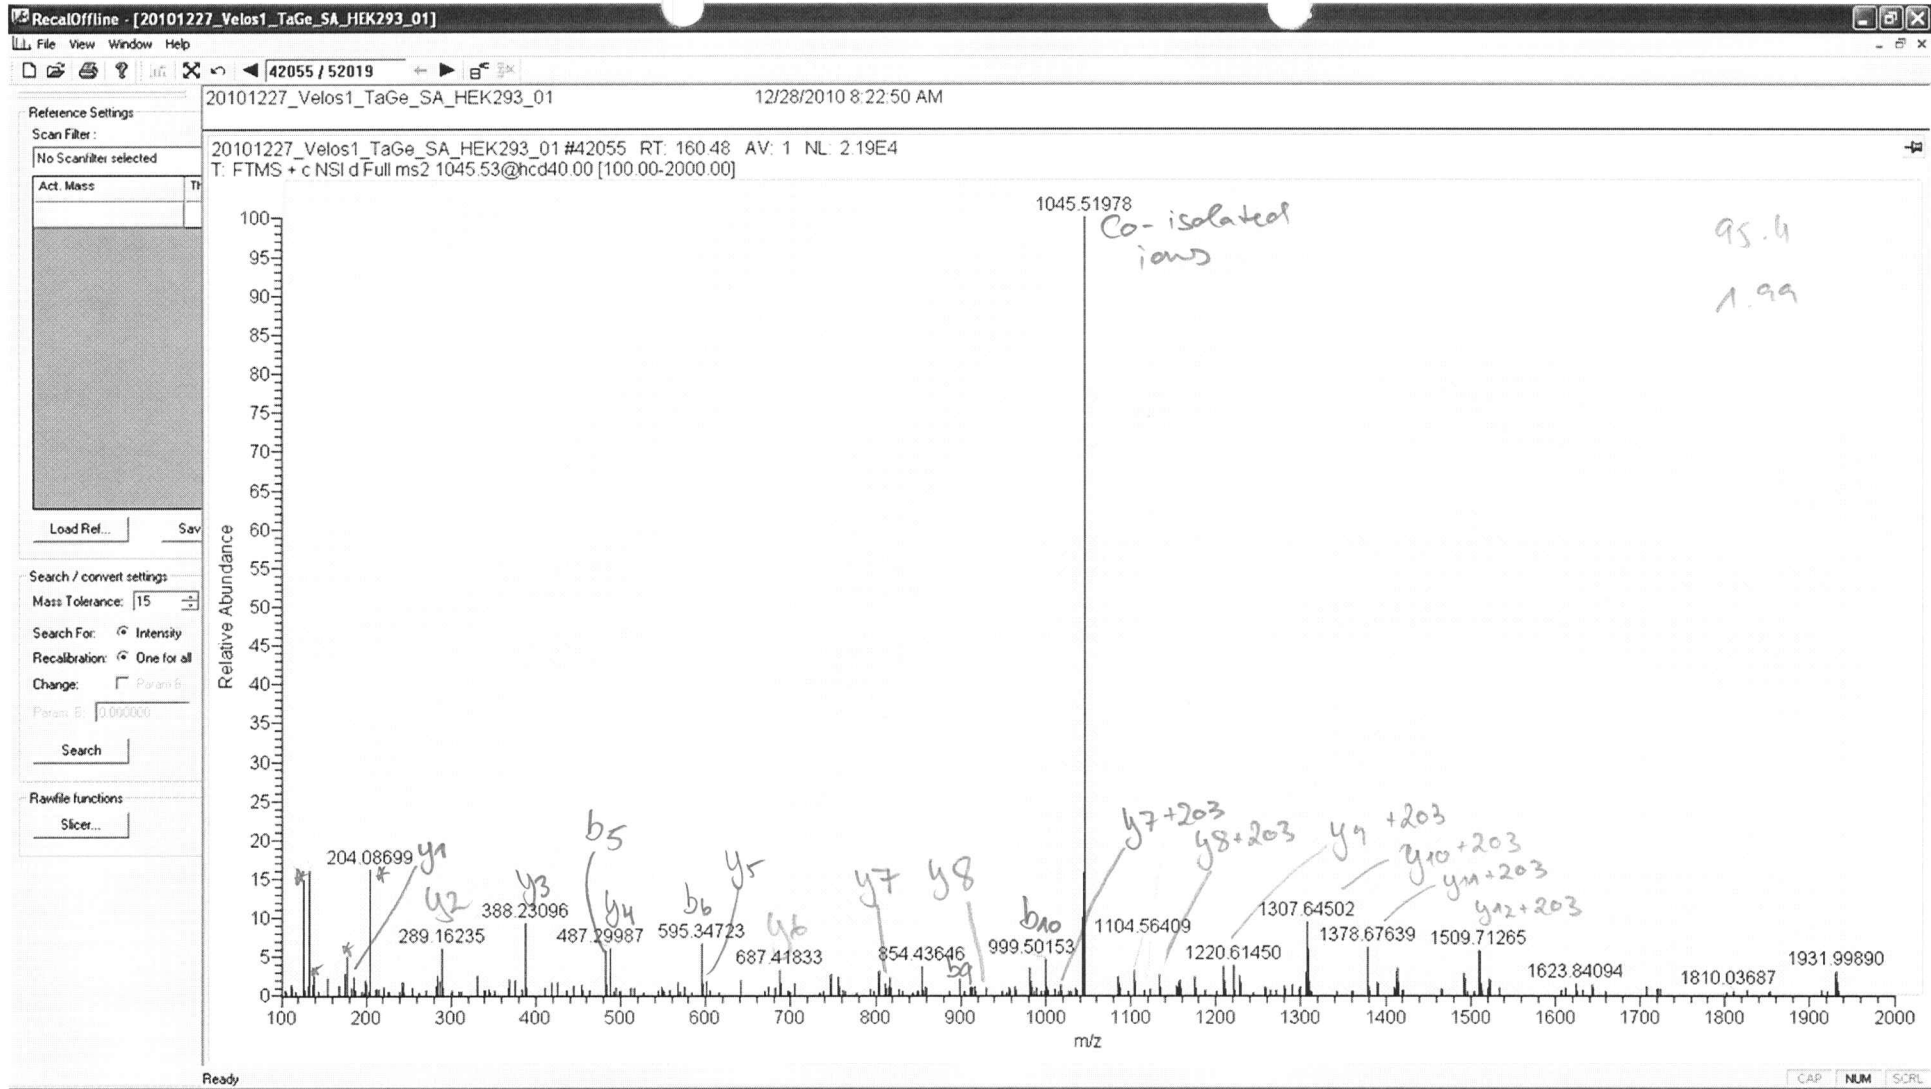

IDGPVISESTPIAETIMASS<sub>n</sub>ESLVVNR

S23

y6  
m

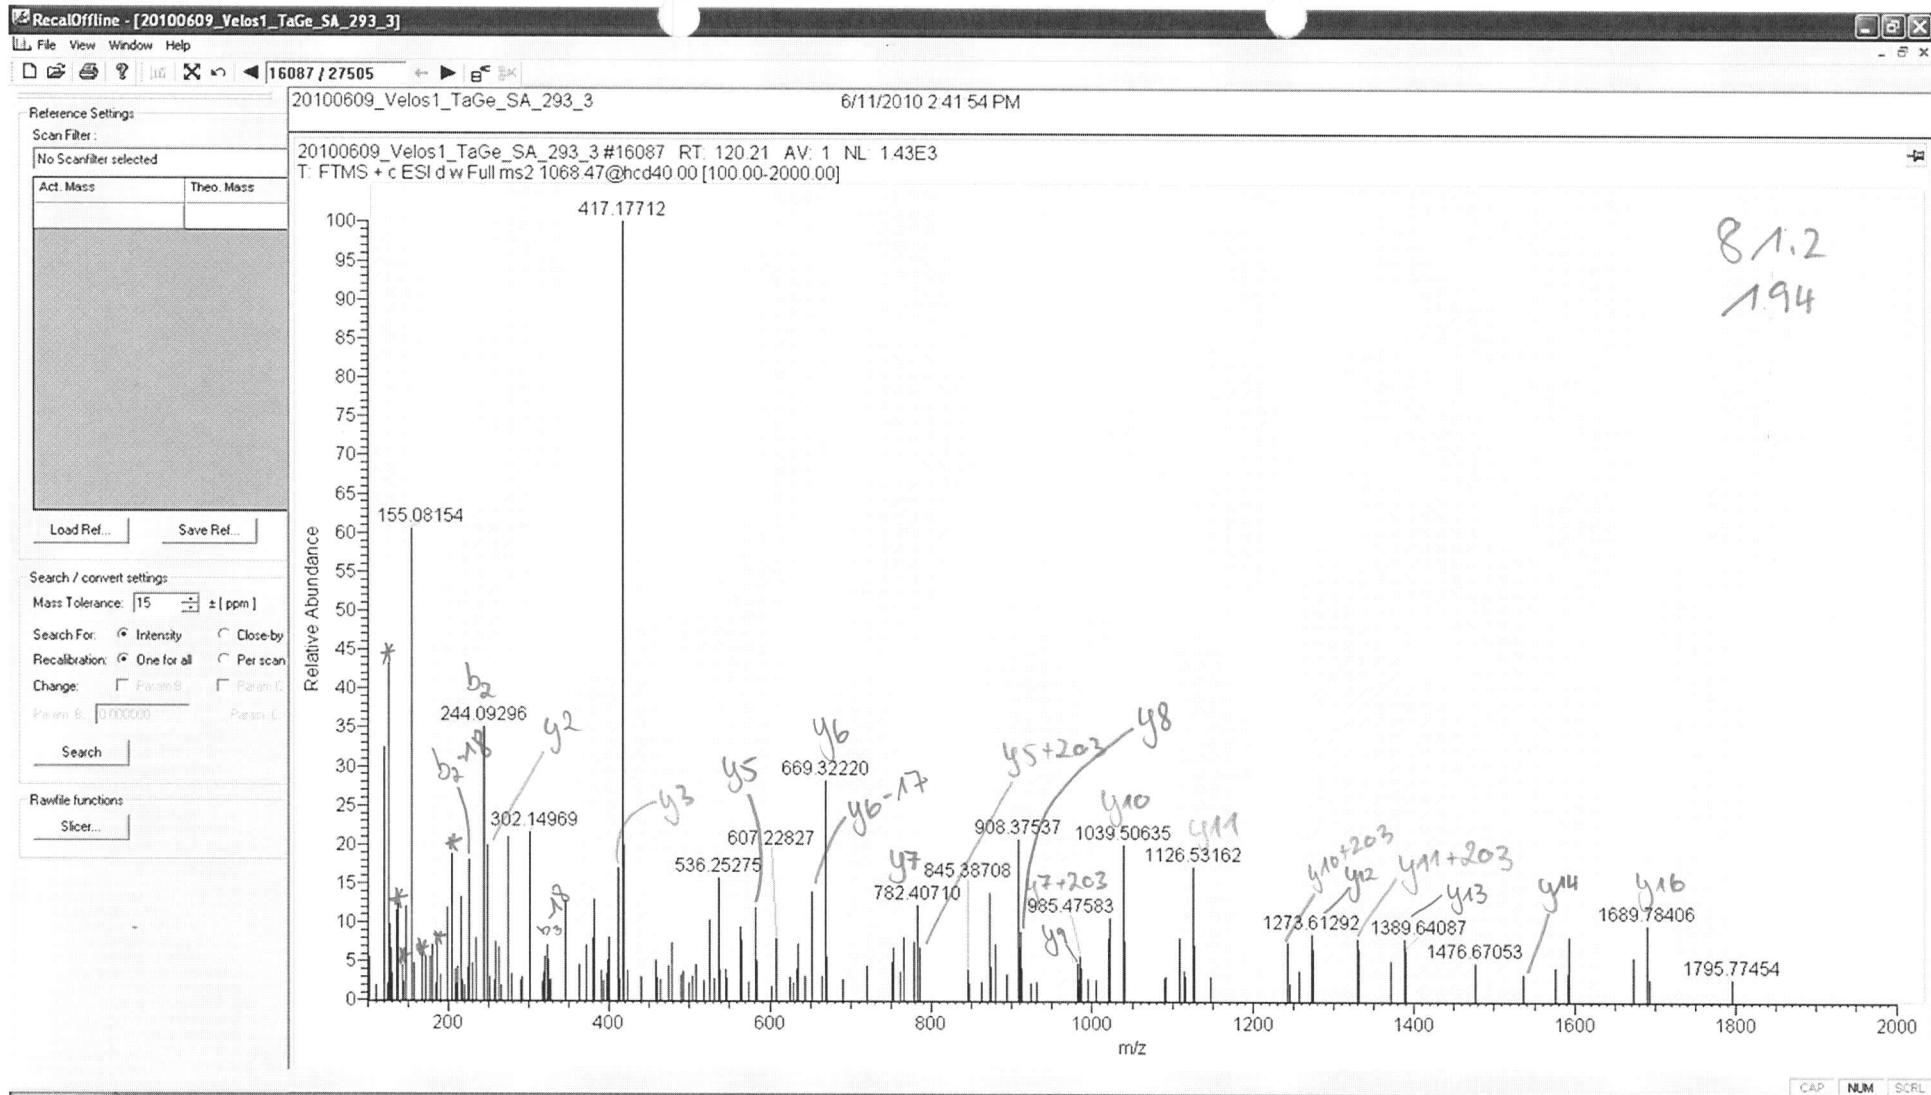

ENPGDFSGAEISGNYtK

N15 or T17



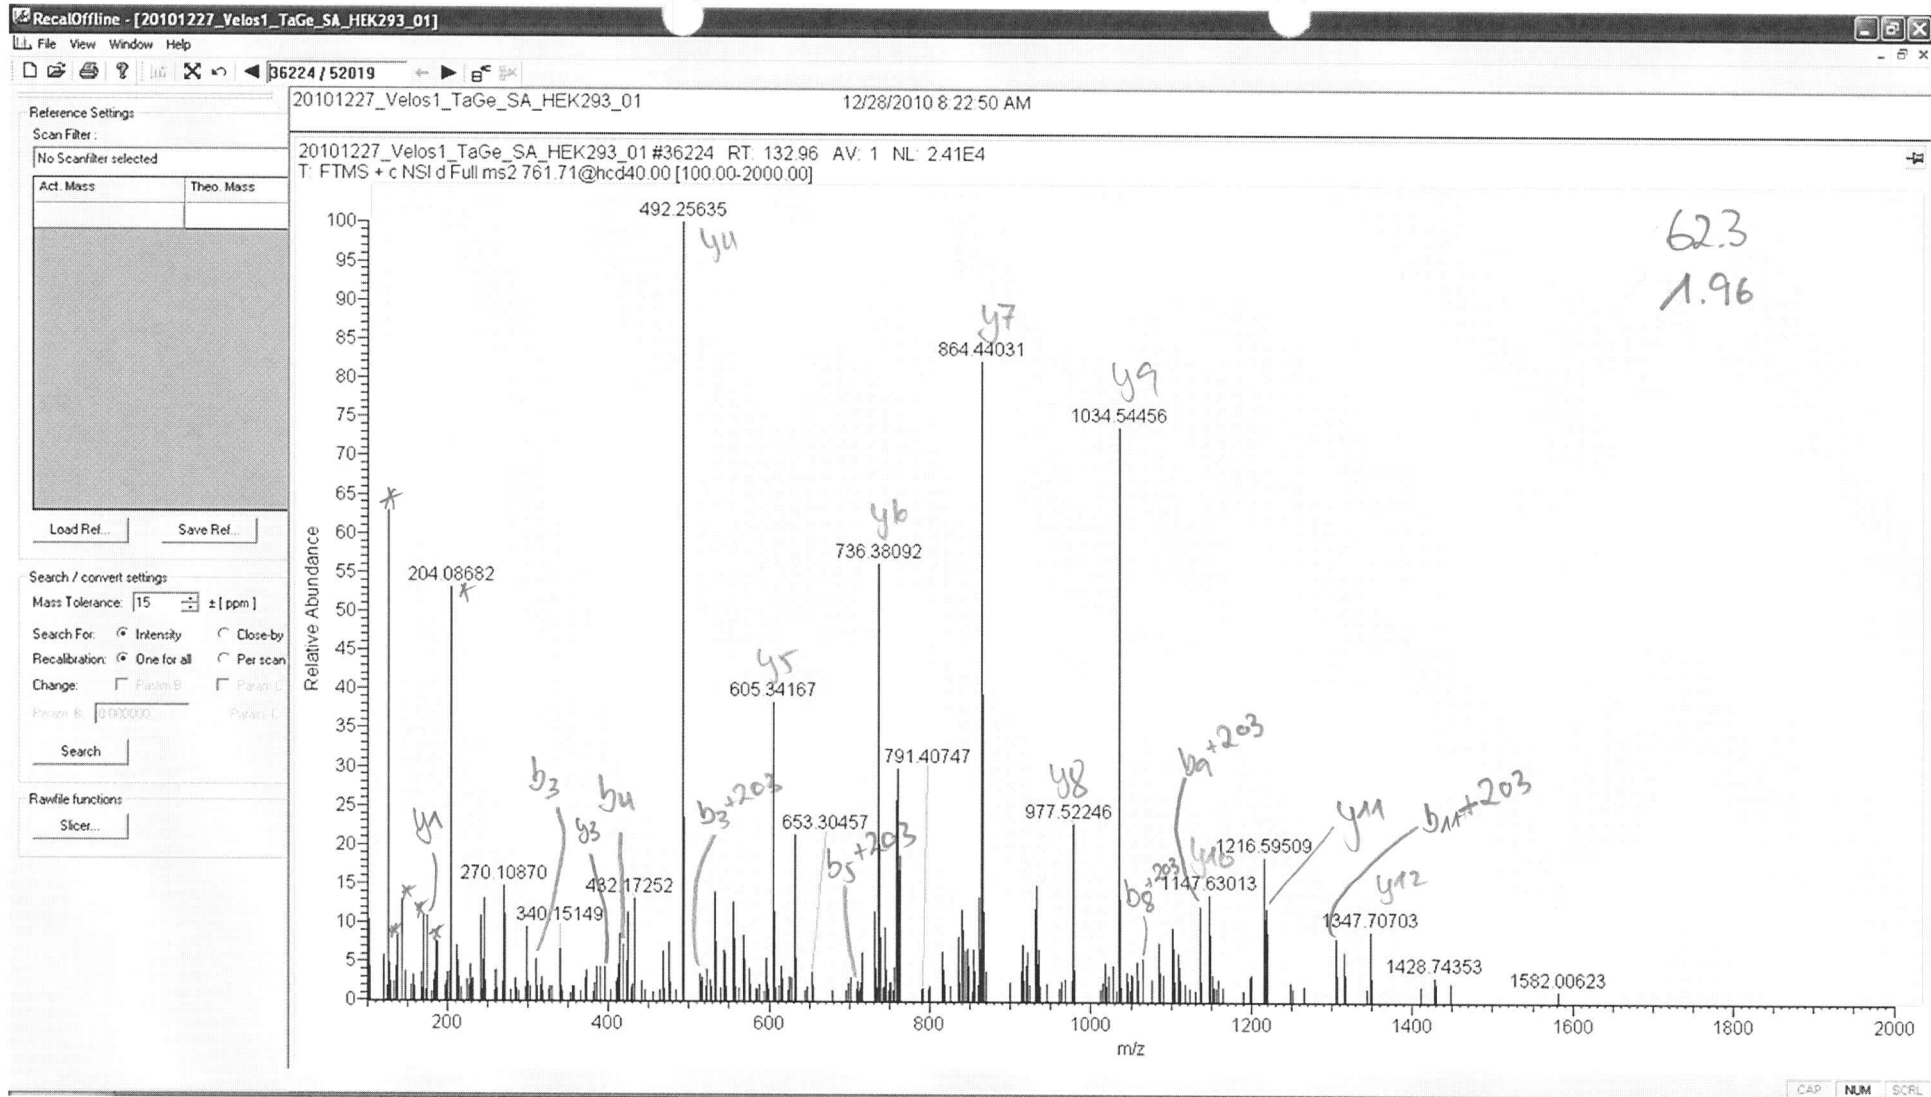

AMNTSQVEALGIQMLPGYR

b3 b5

N30

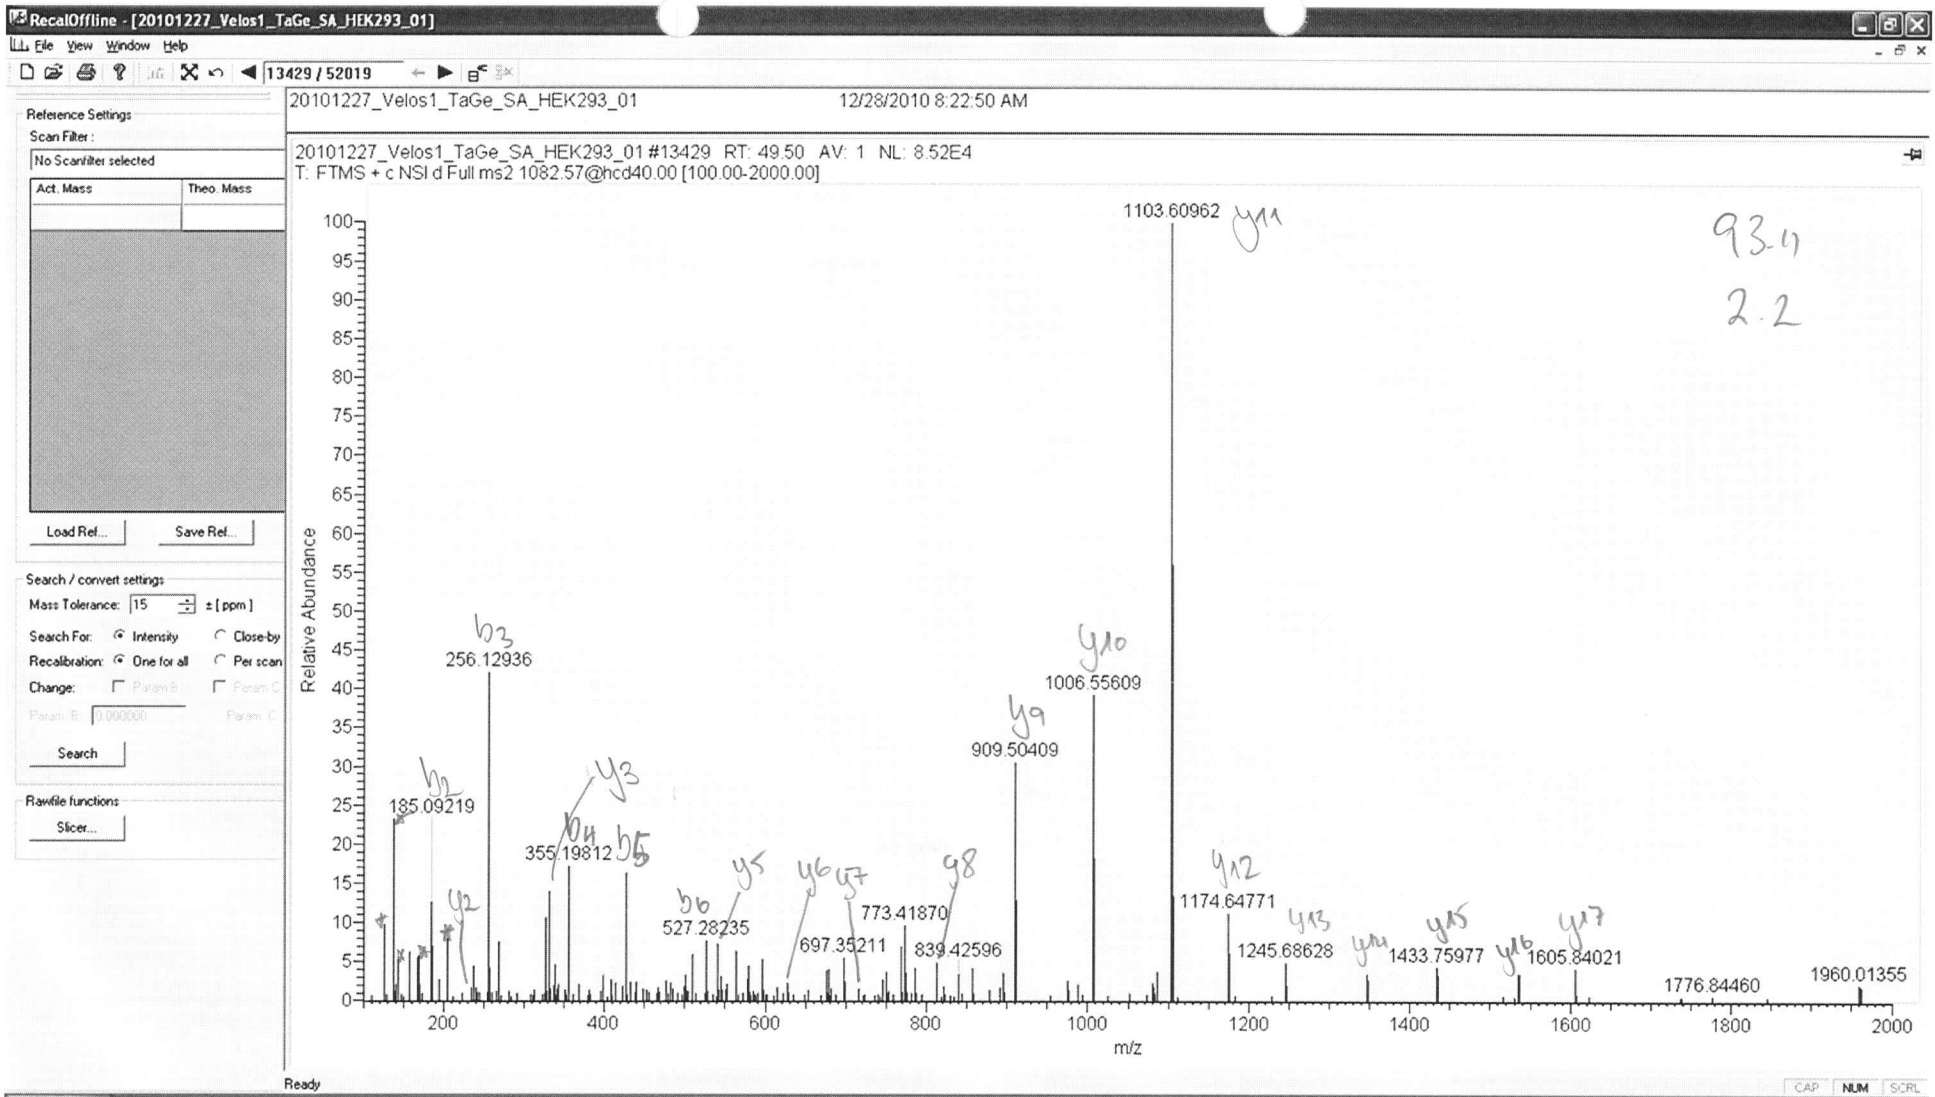

*y11*  
SPAVATSTAAPPPSSPLP*s*K

no site evidence

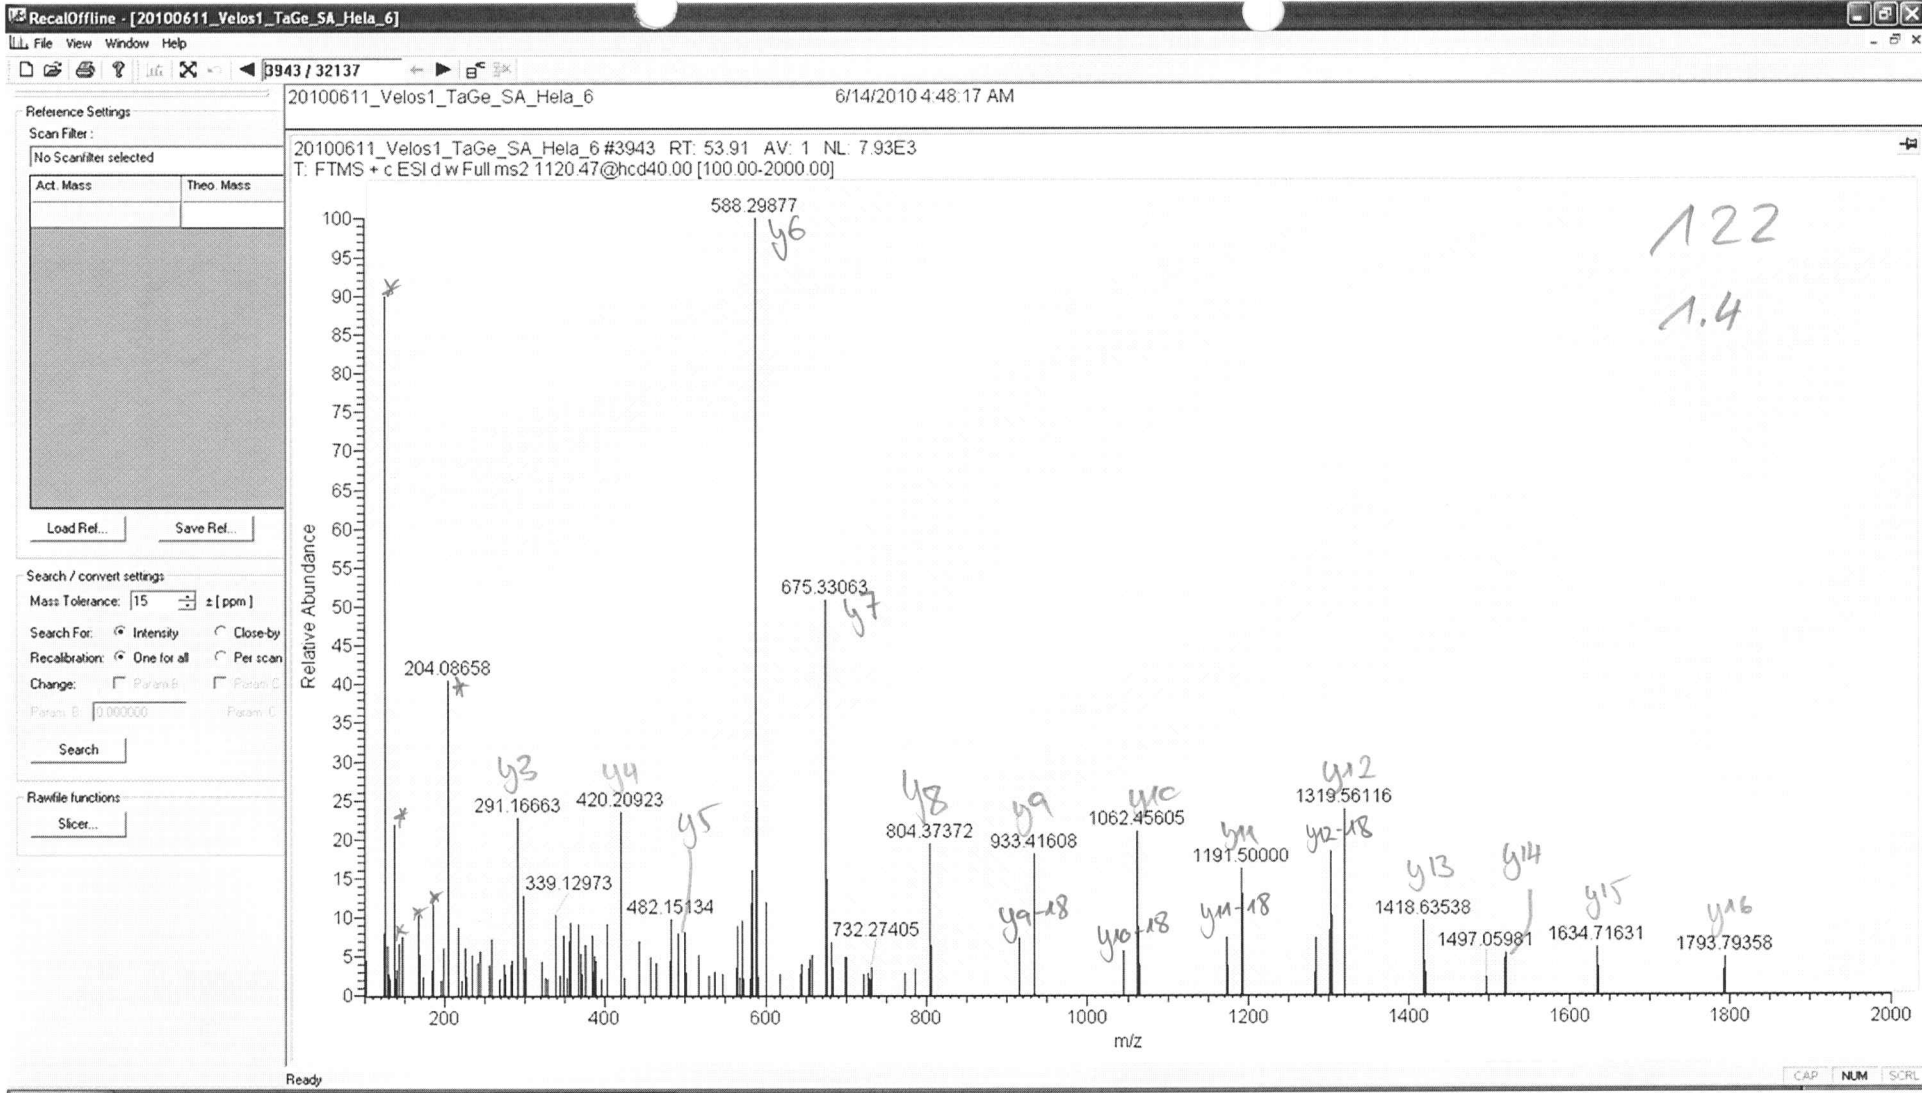

ENGDTVQEEEE<sup>y7</sup>SPAEGSk

No site evidence

GM

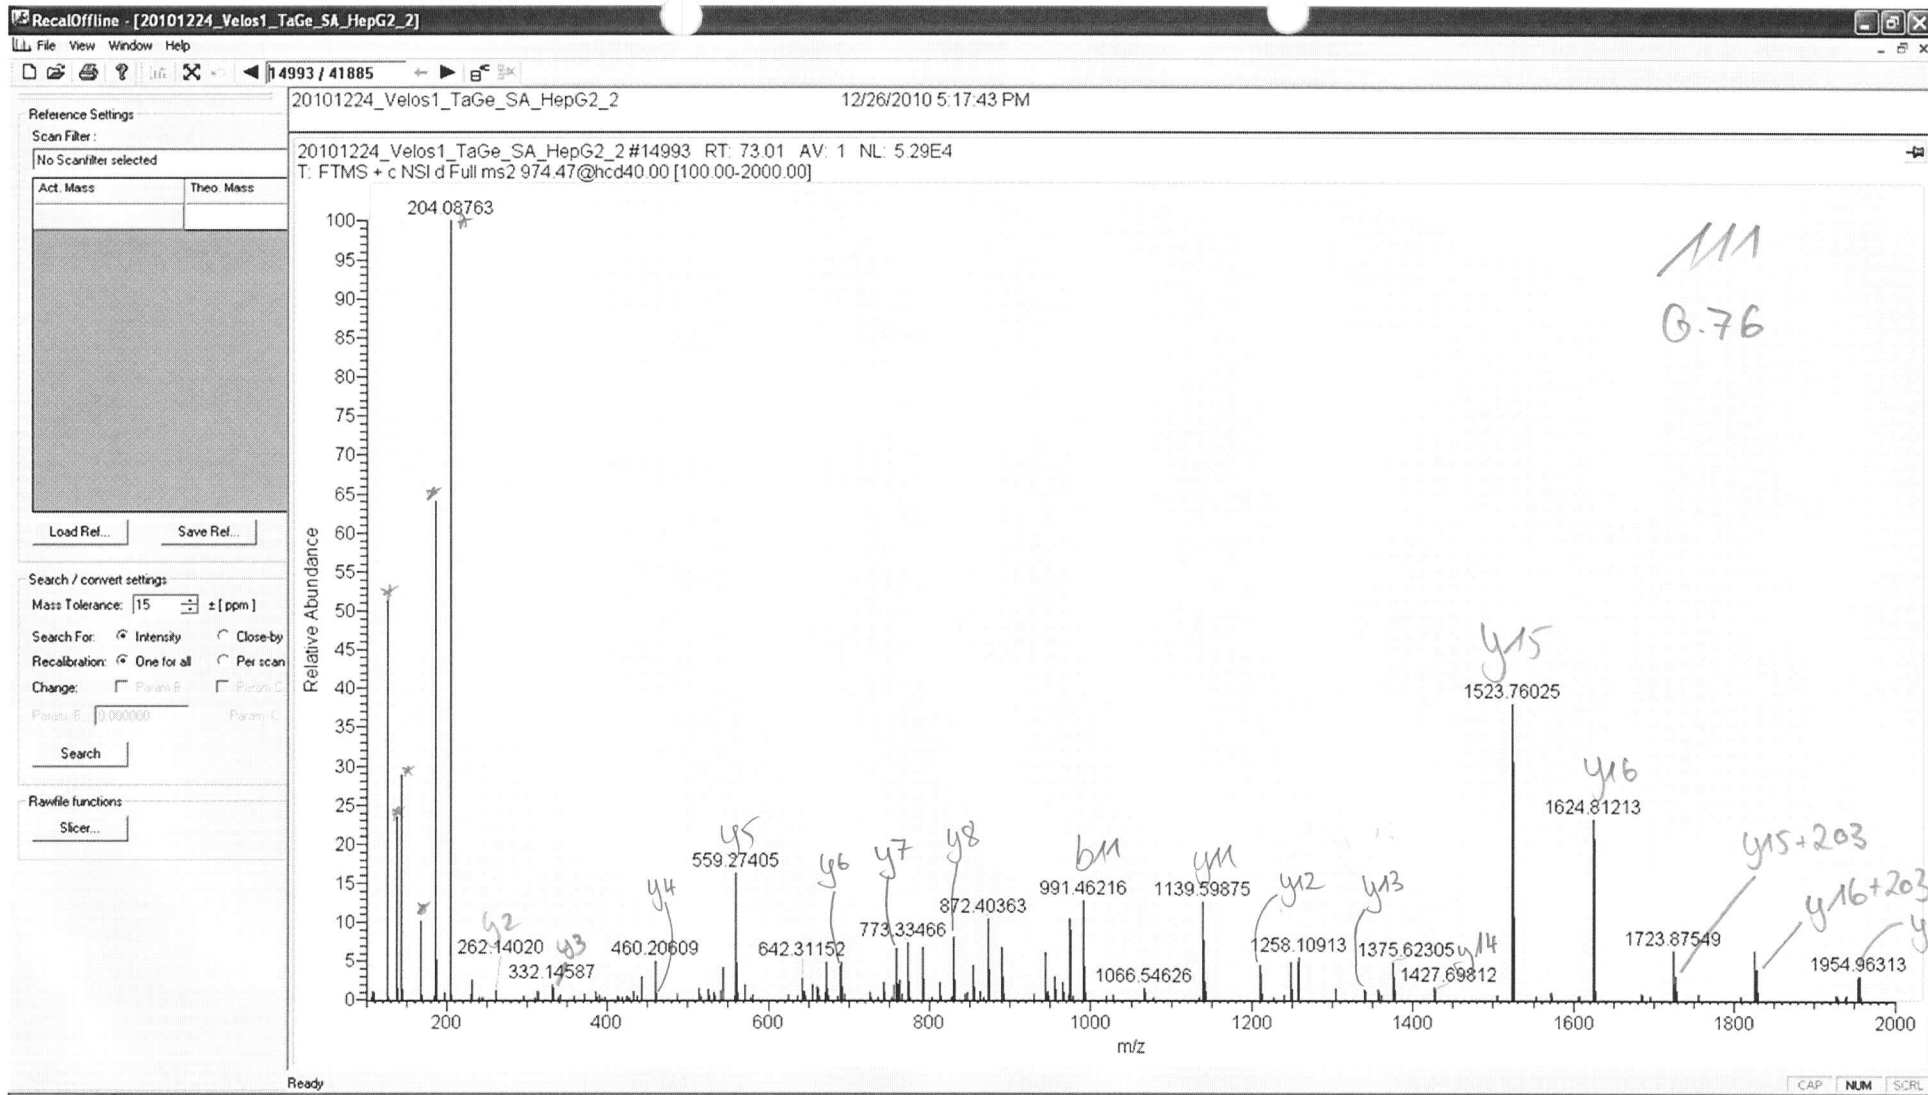

TETGATETV**P**SEAPVLA**A**EPEADK

b11 y15

S12 and  
2nd site ambiguous

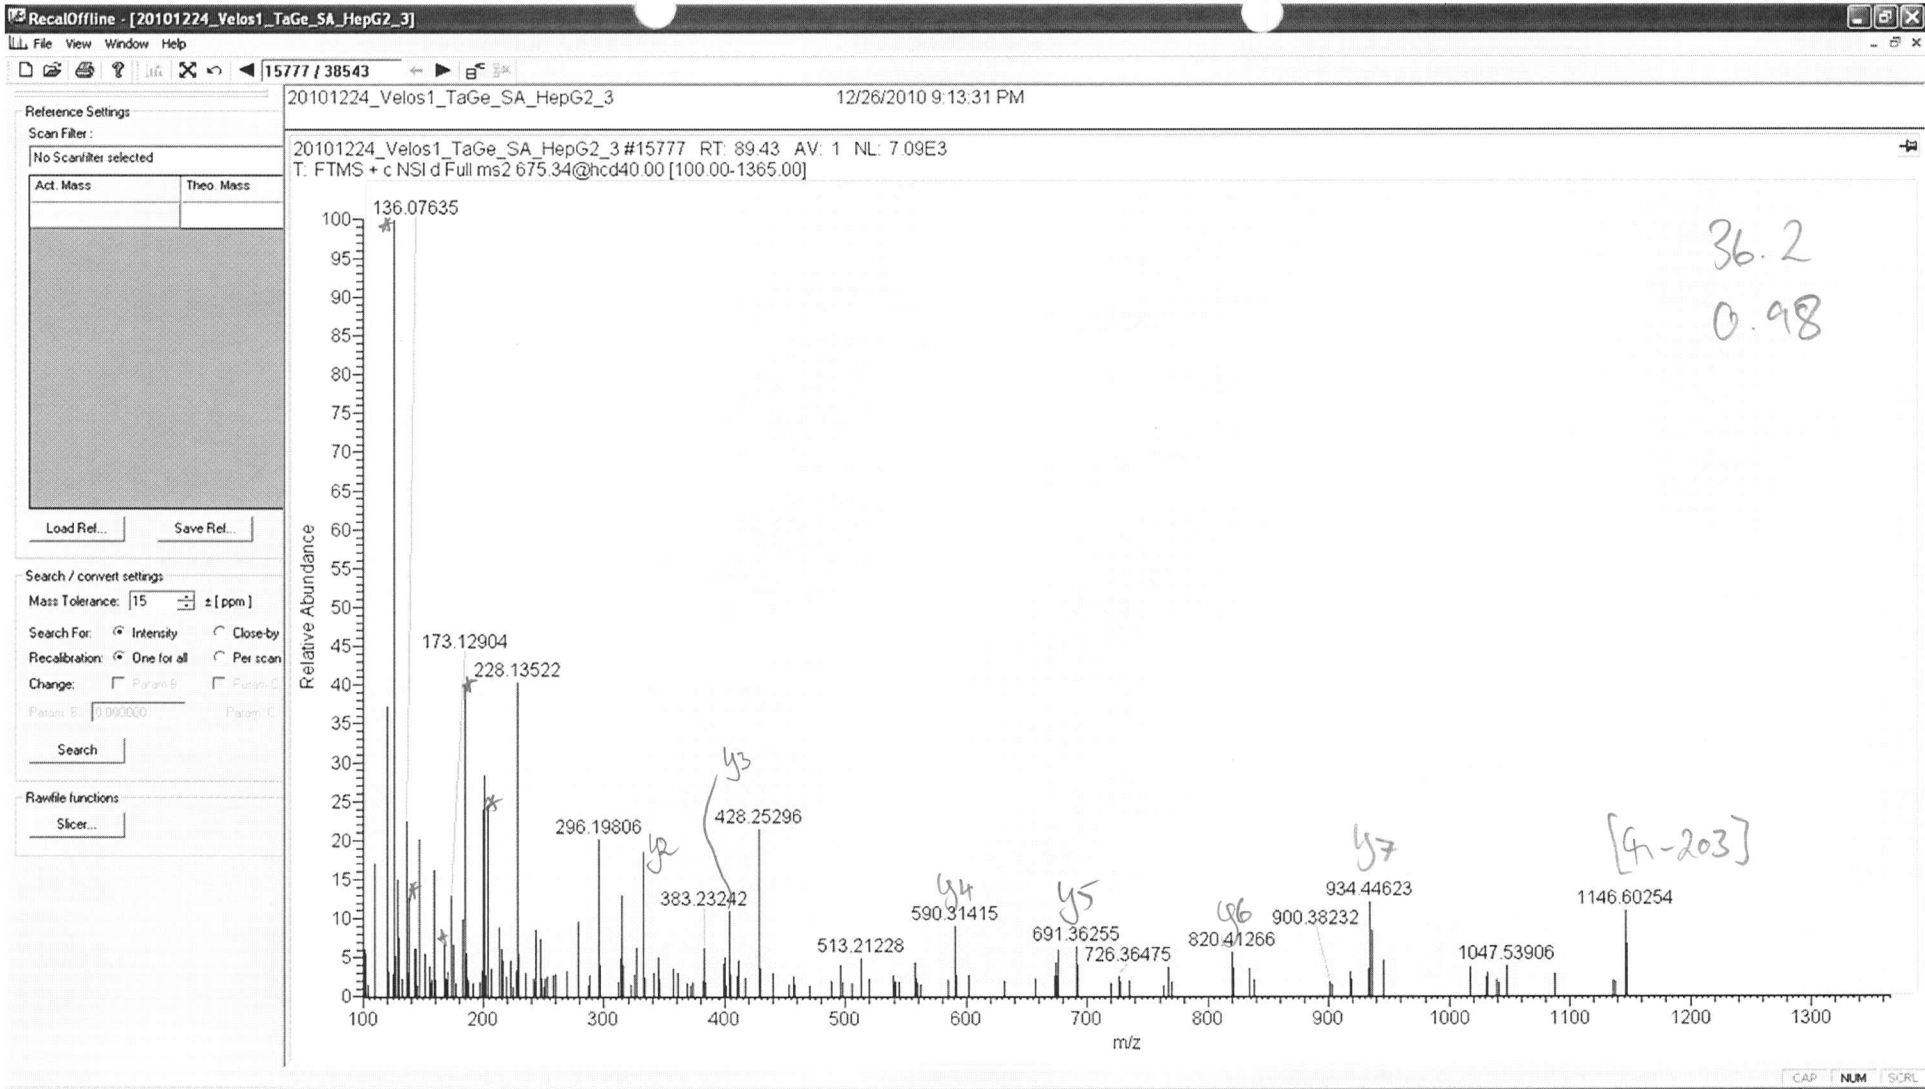

VINETWAWK

no site  
evidence



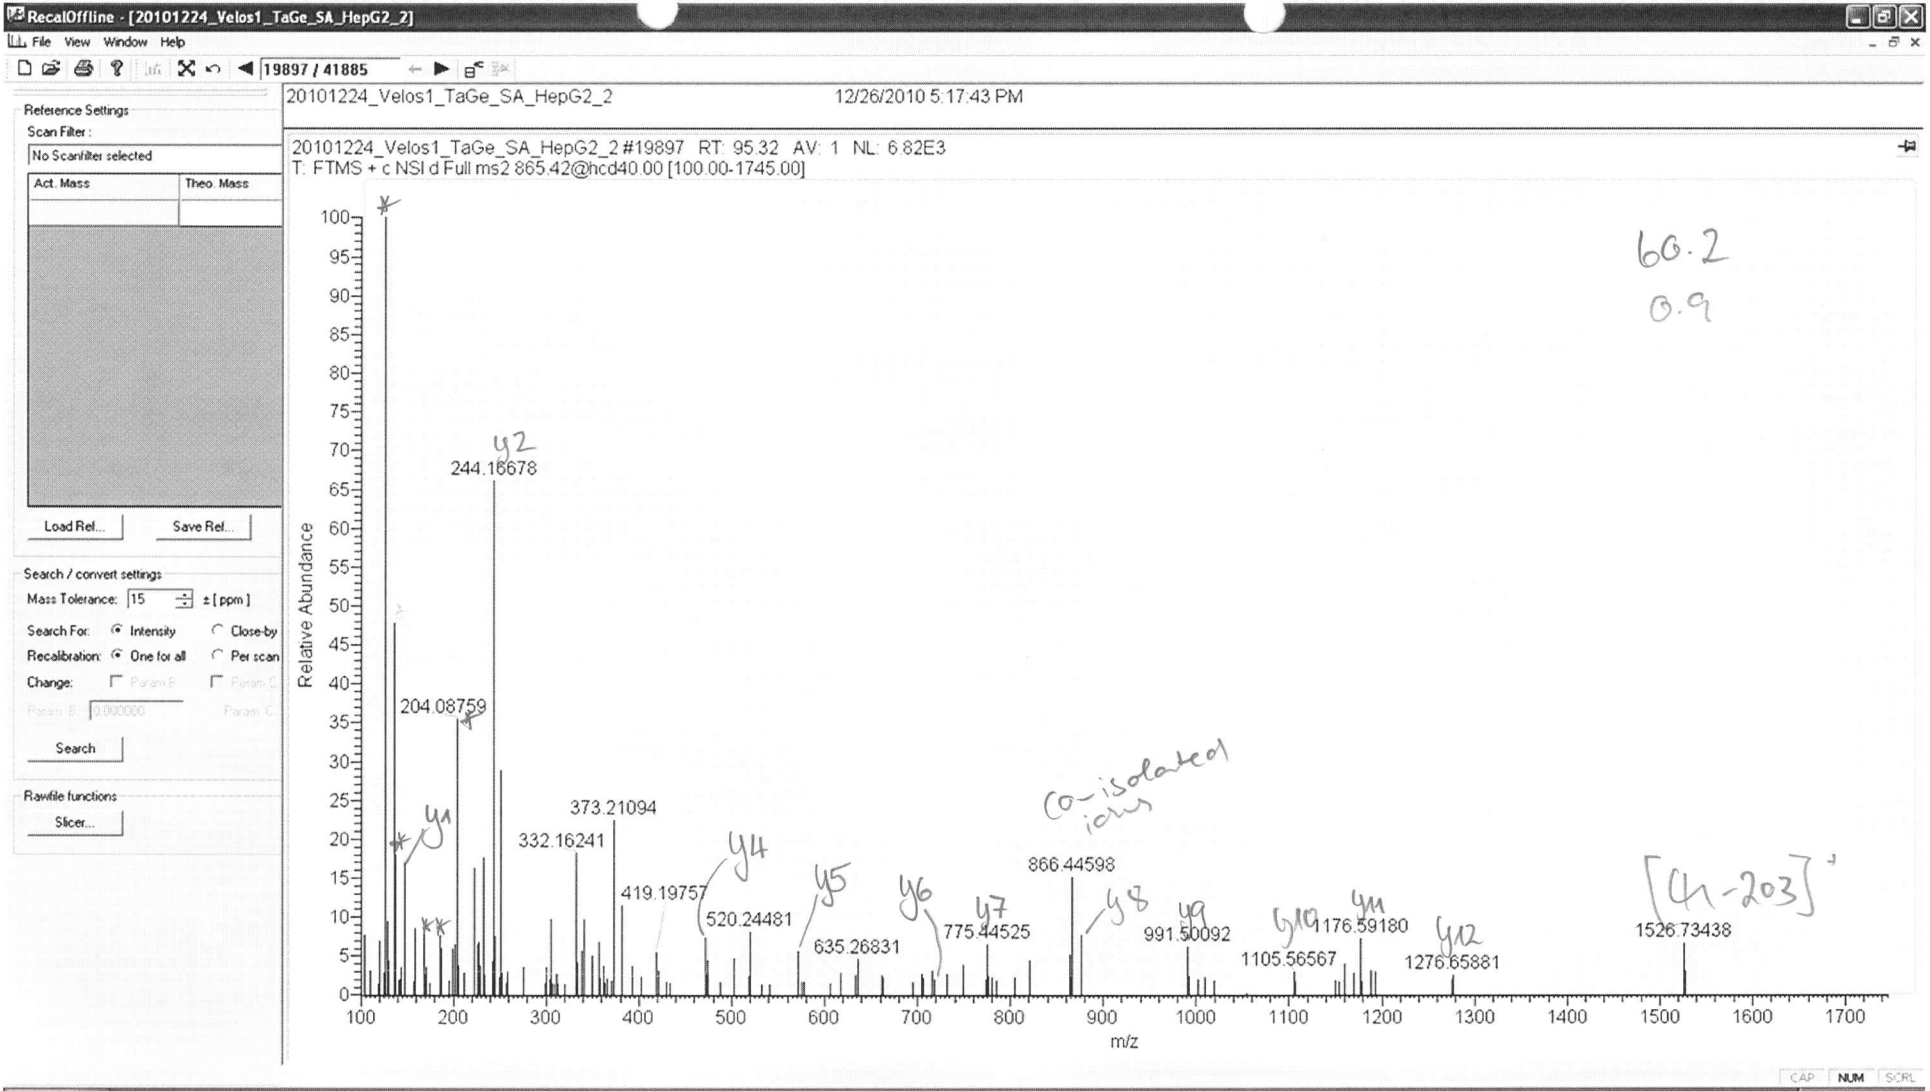

y10 y8  
YSVANDtGFVDIPK

No site  
evidence



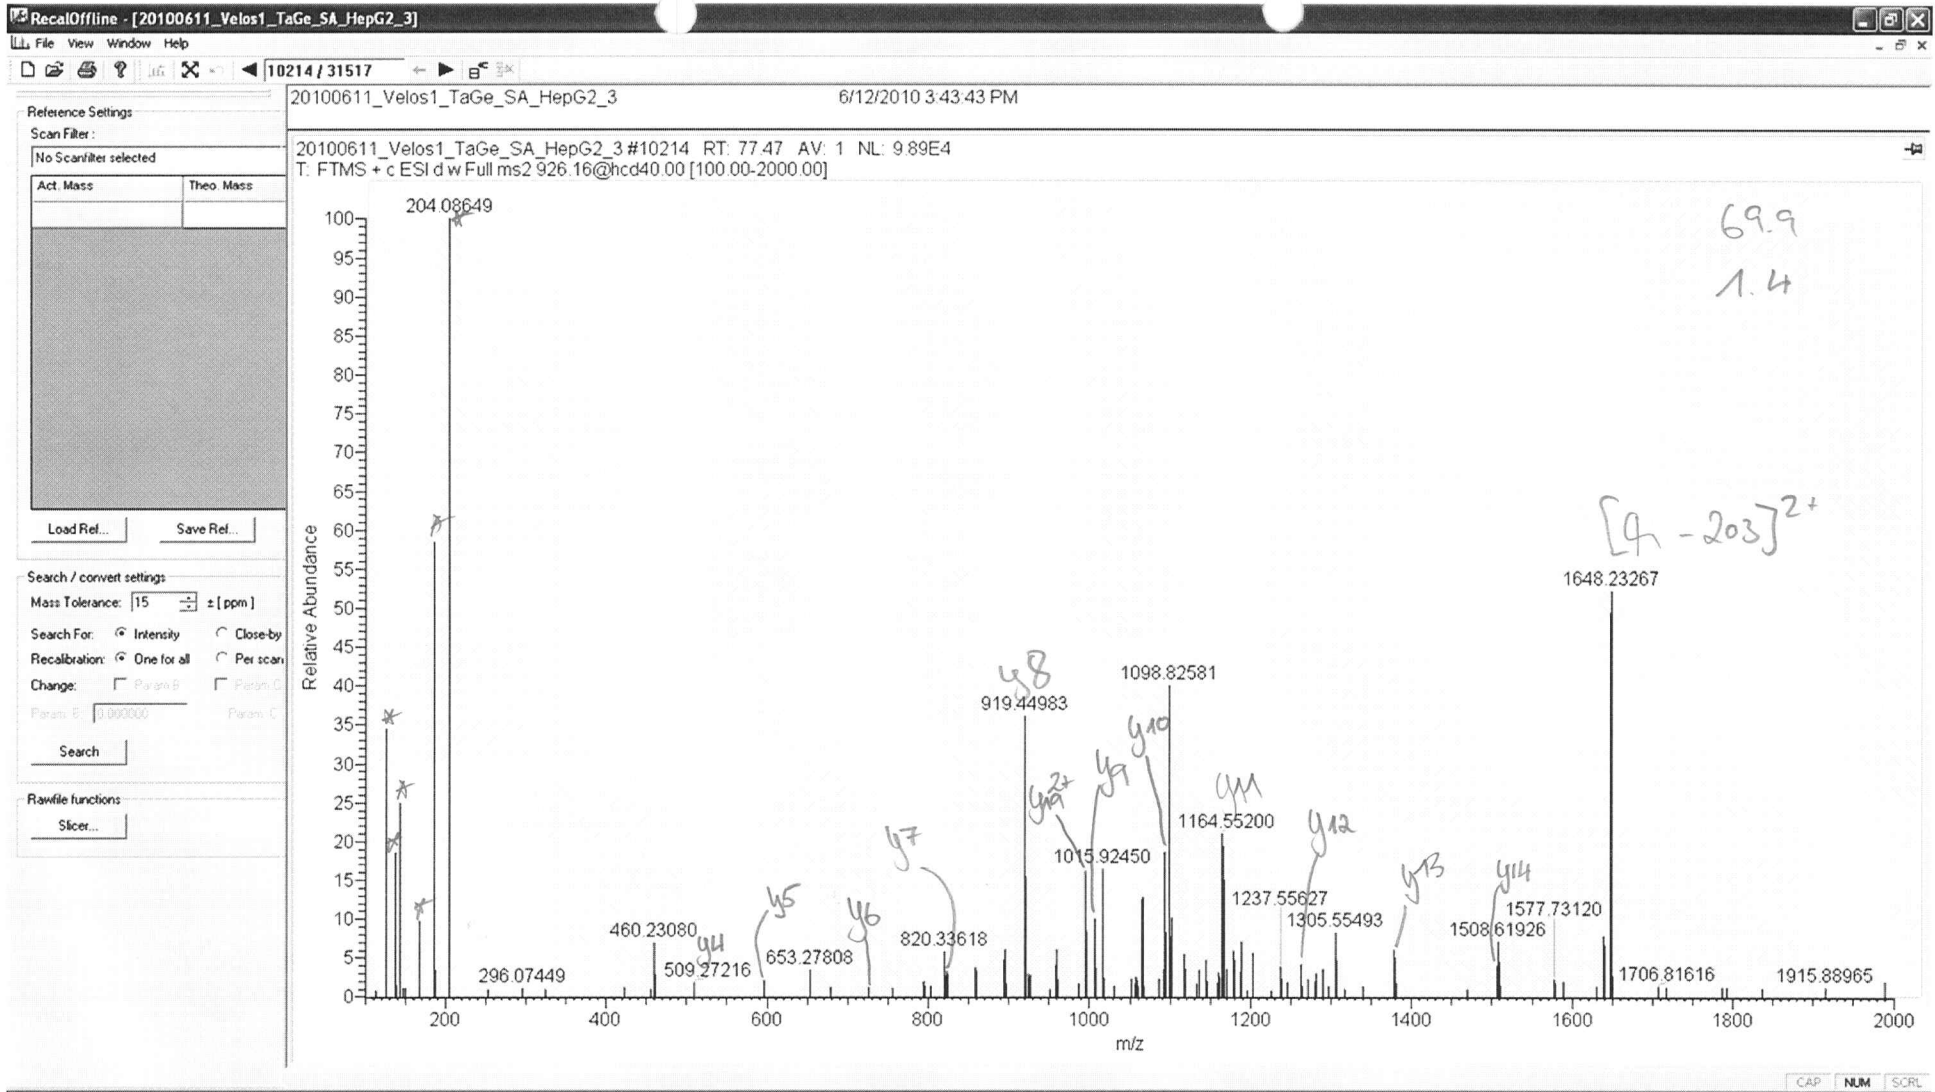

EFHHGPDPTDTAPGEQAQDVASSPPESsFQK

no site evidence



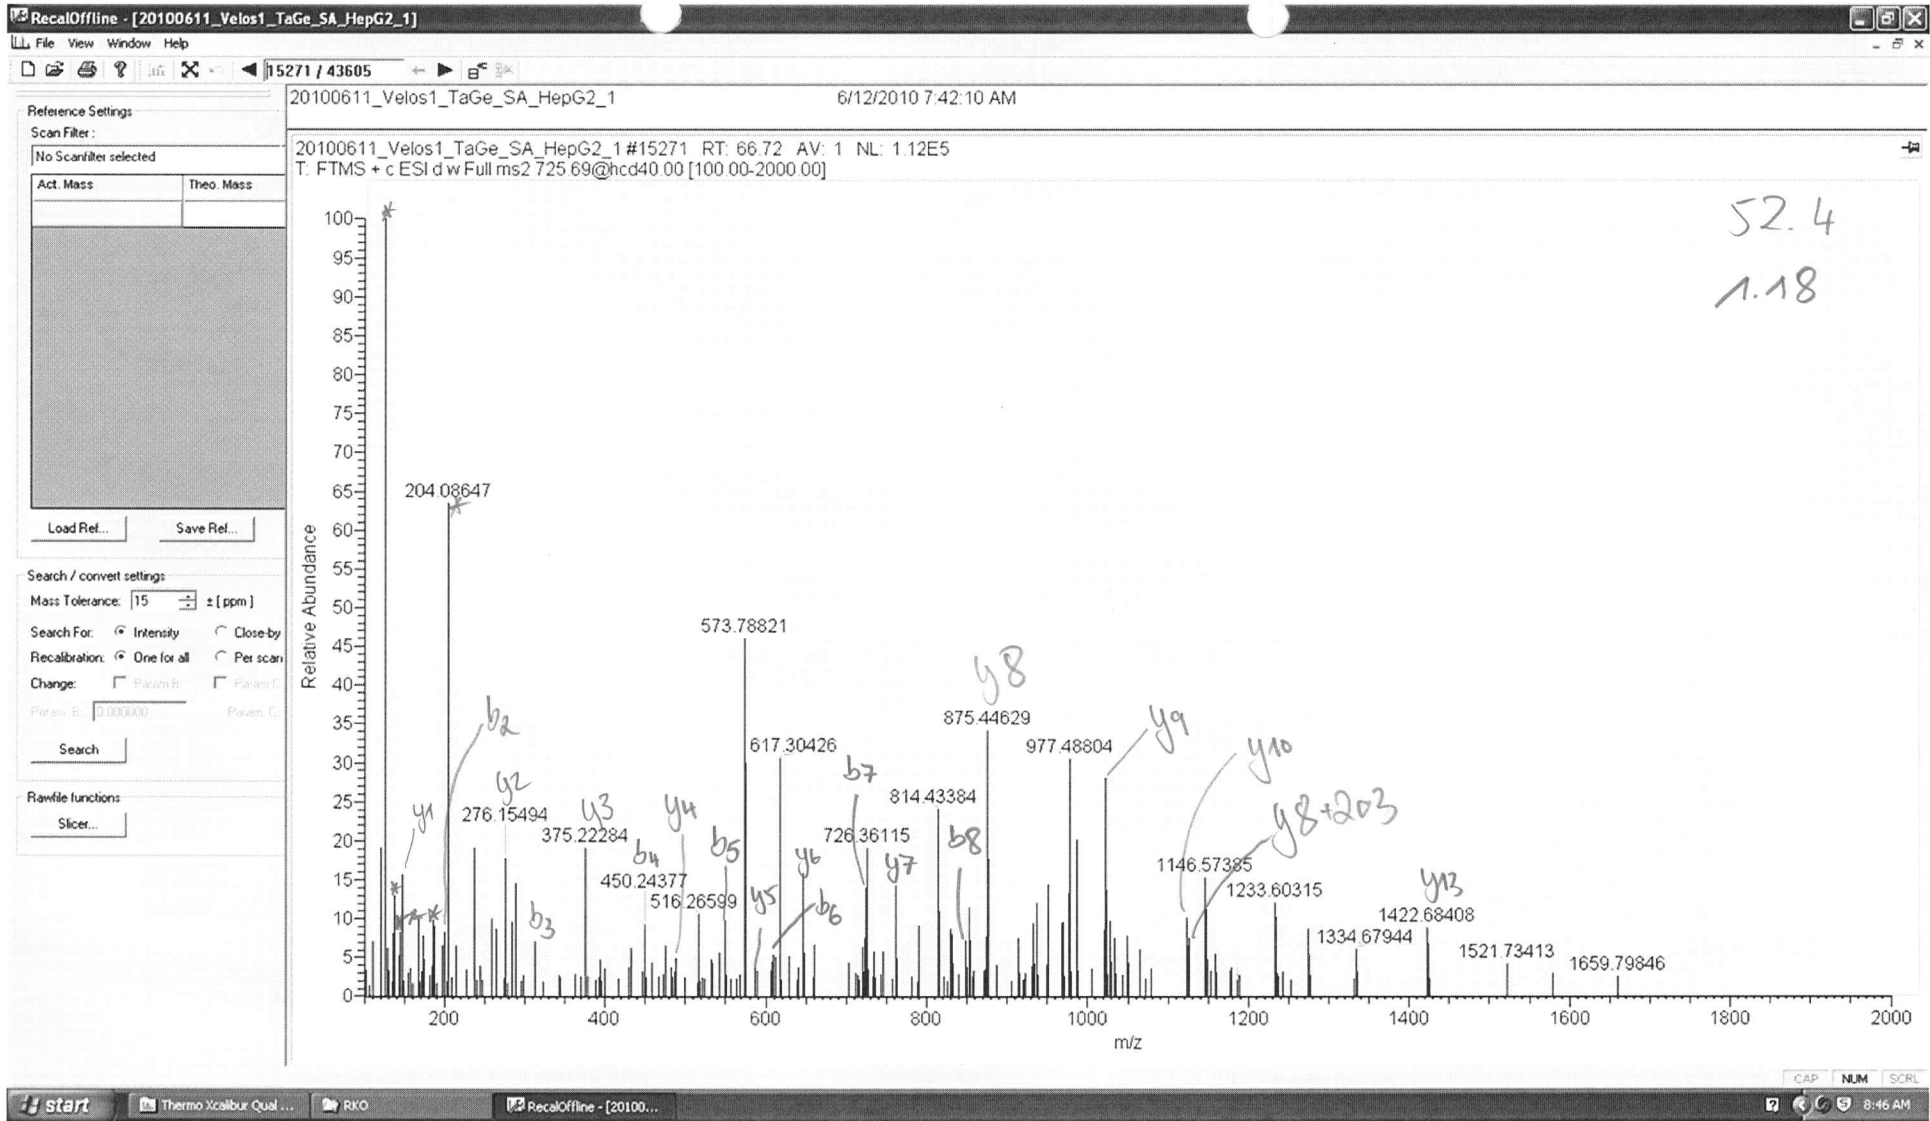

<sup>y8</sup>  
QAIHVG<sup>y8</sup>NQTFNDGtIVEK

N11 ≈ T14

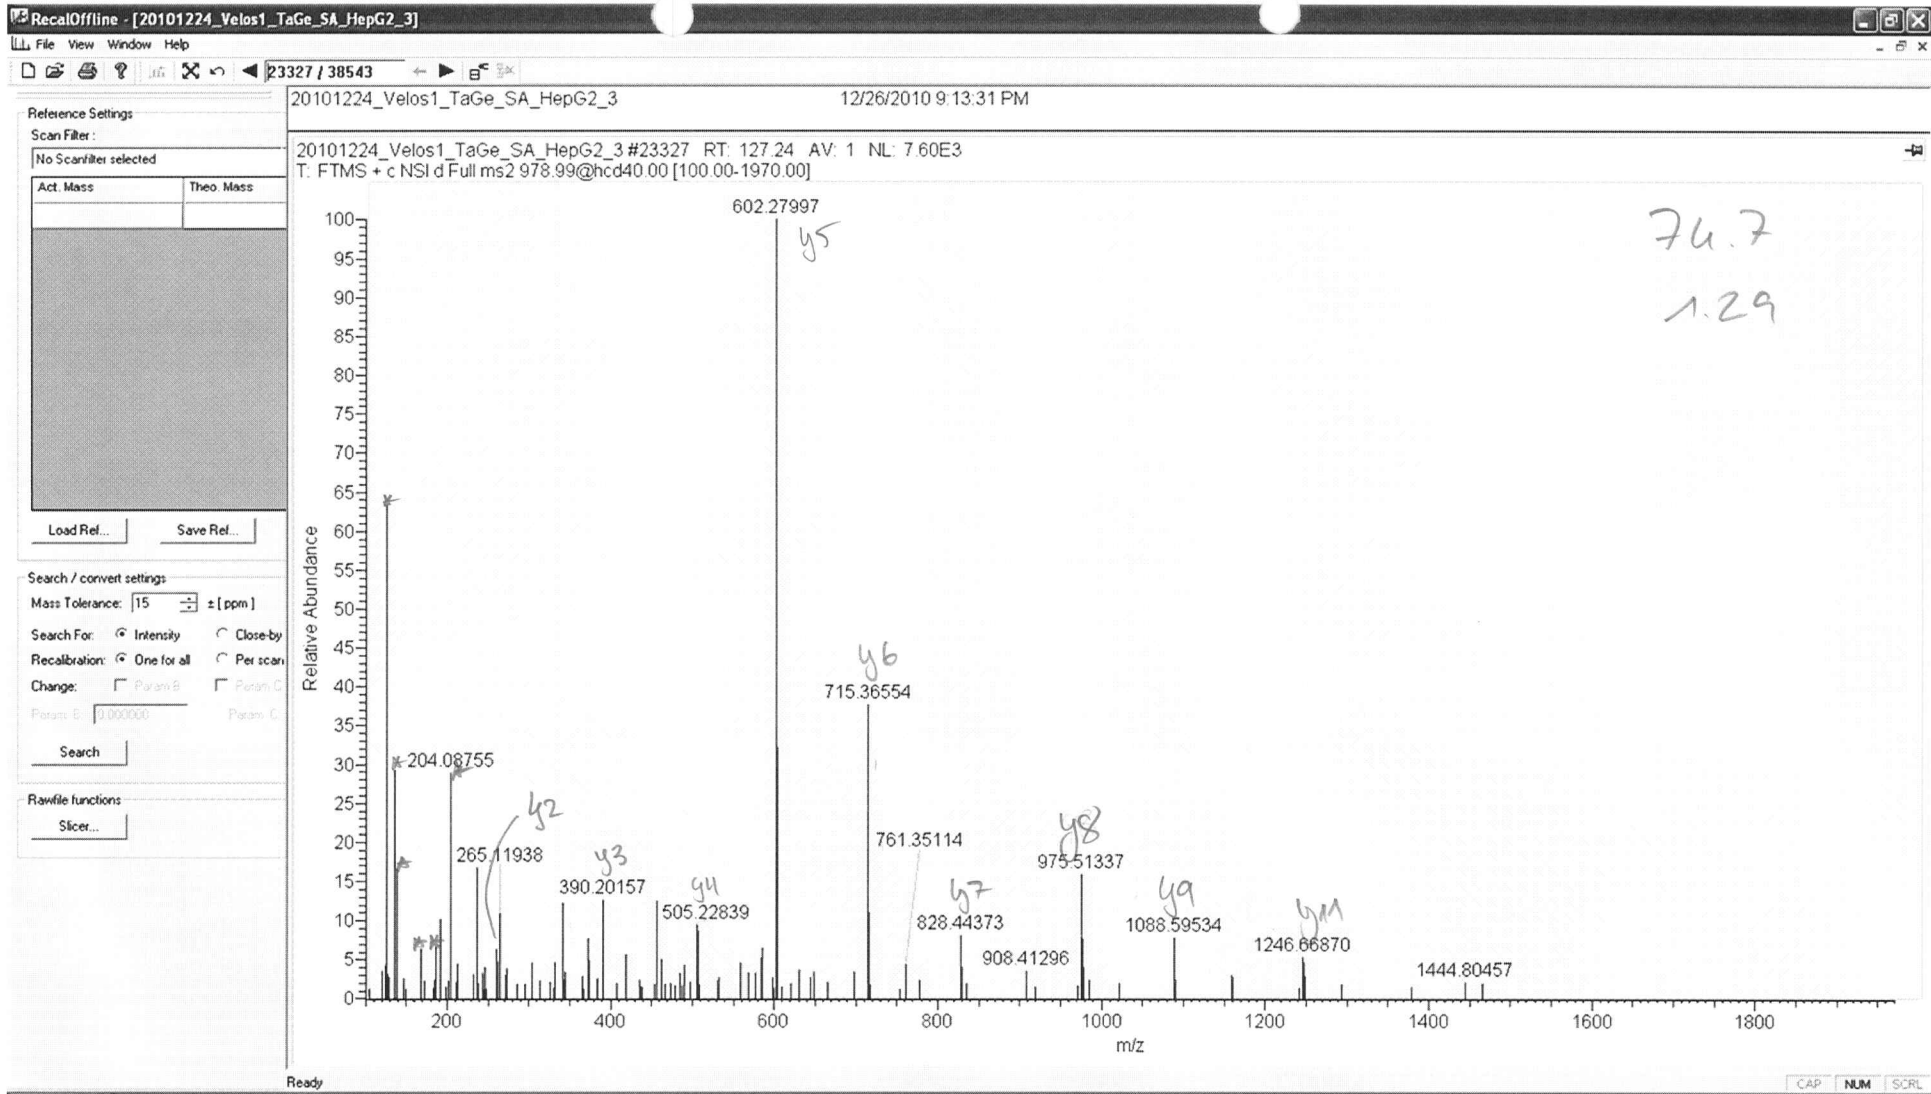

YTGNA<sup>y11</sup>sALFILPDQDK<sup>y5</sup>

no site evidence

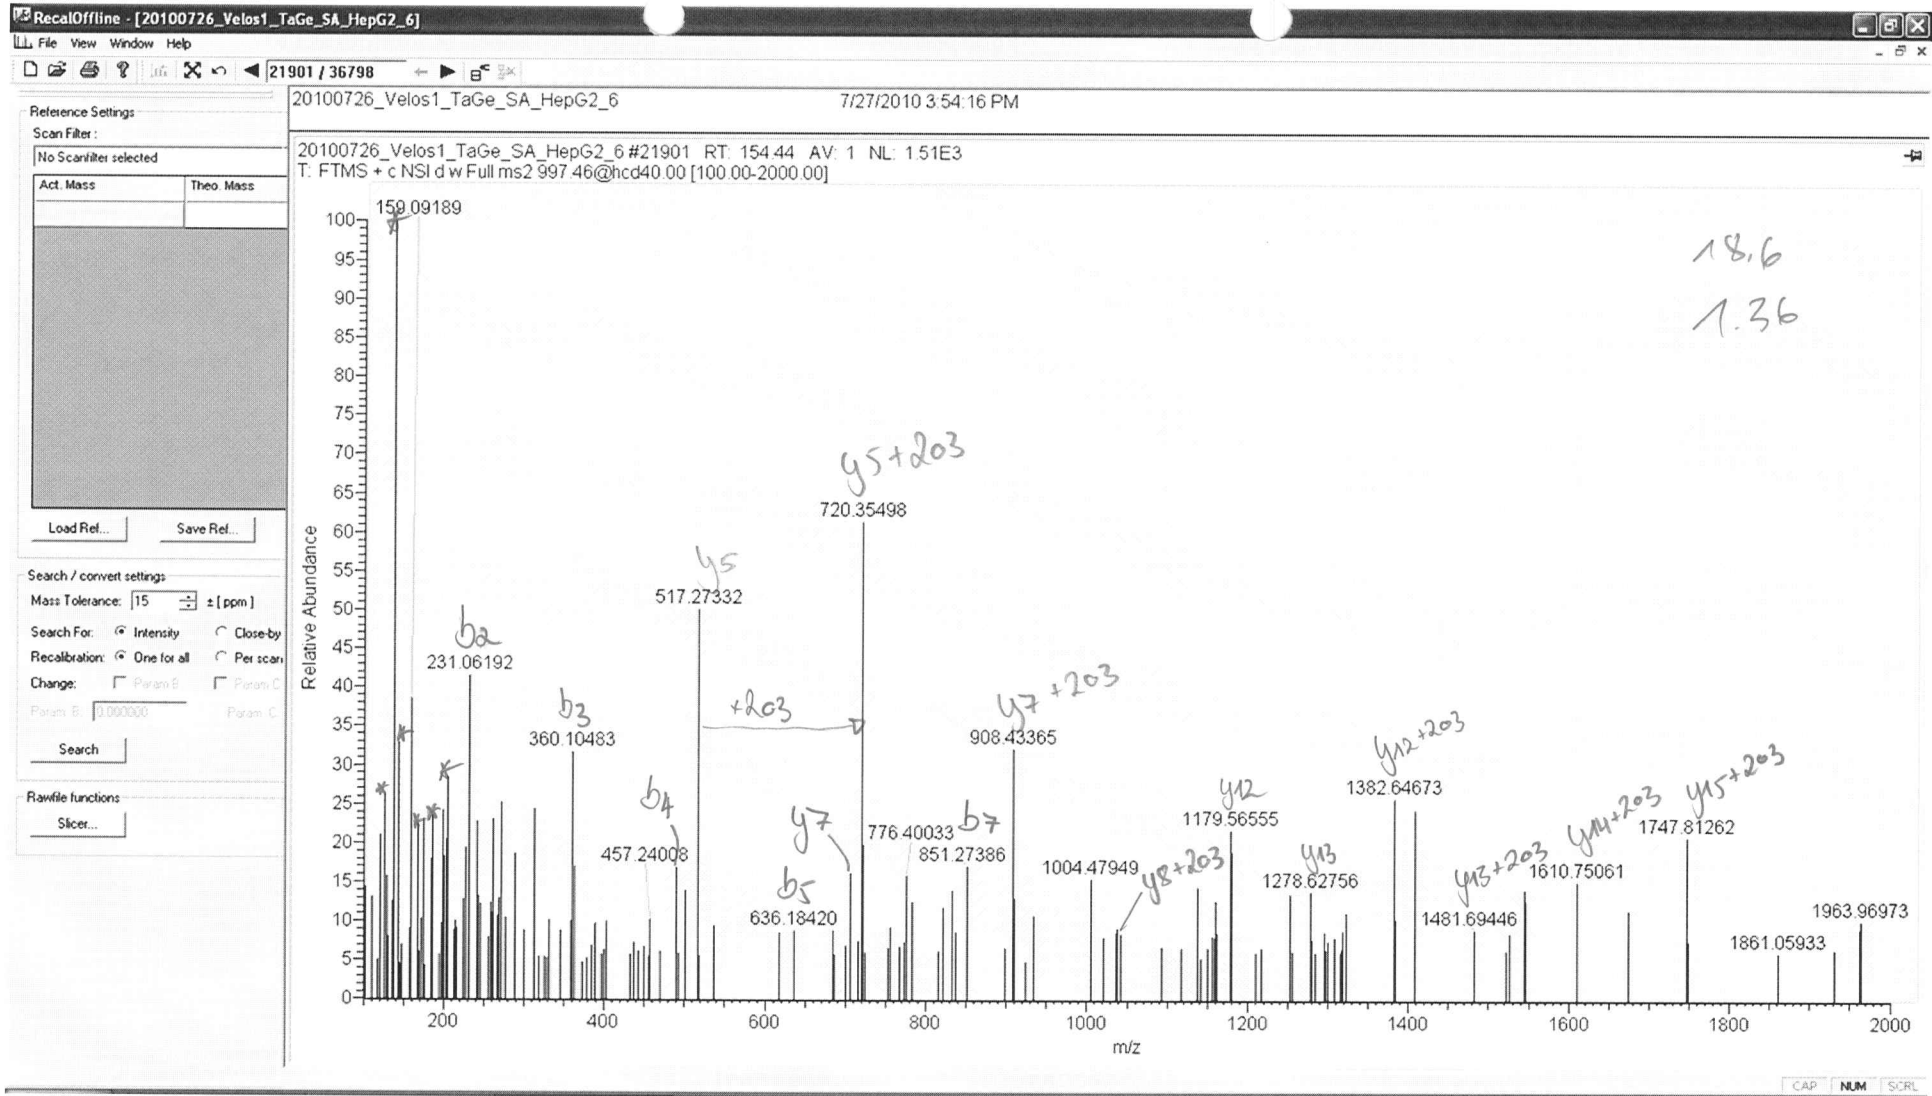

DDEEmNTWIQAISSAISSDKHEVSASTQStPASSR

S33 or 34

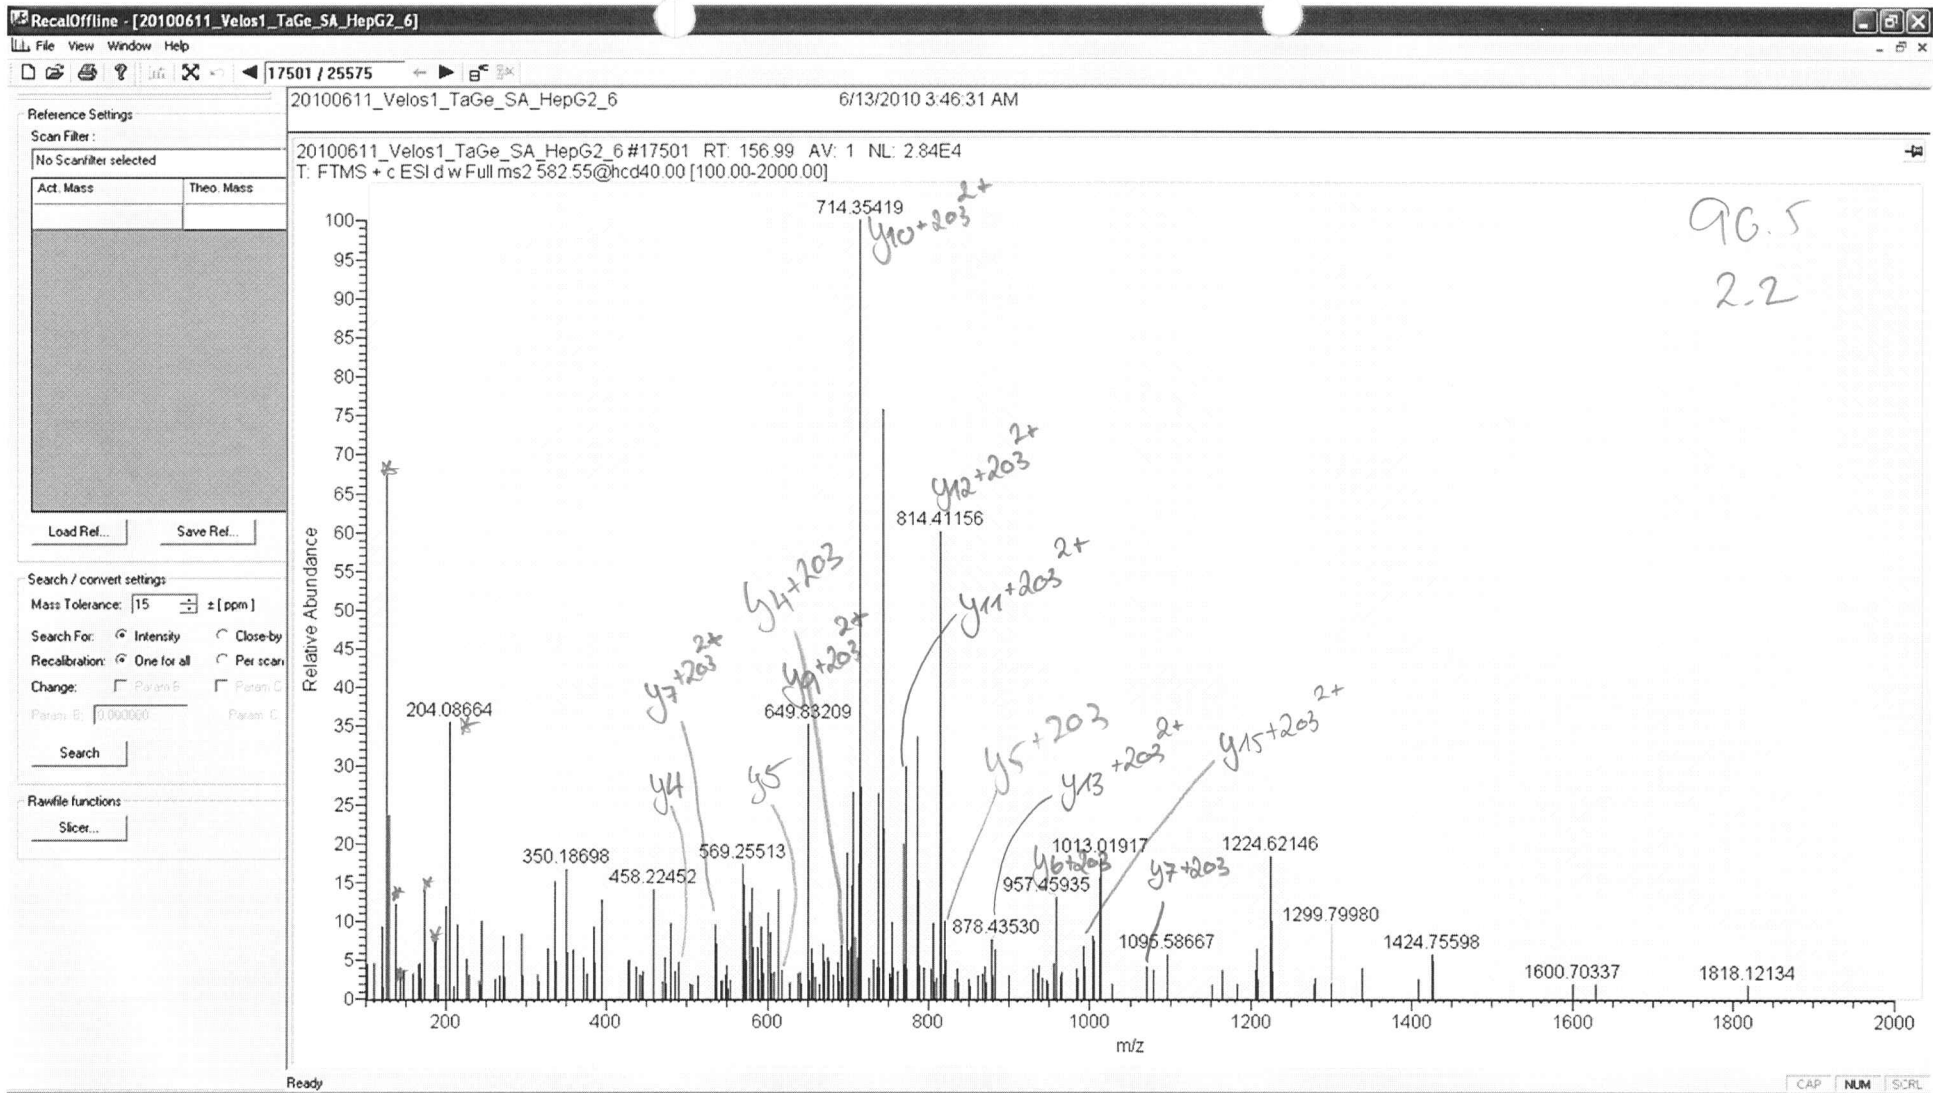

VDKDLQSLIEDILHQVENK

N17

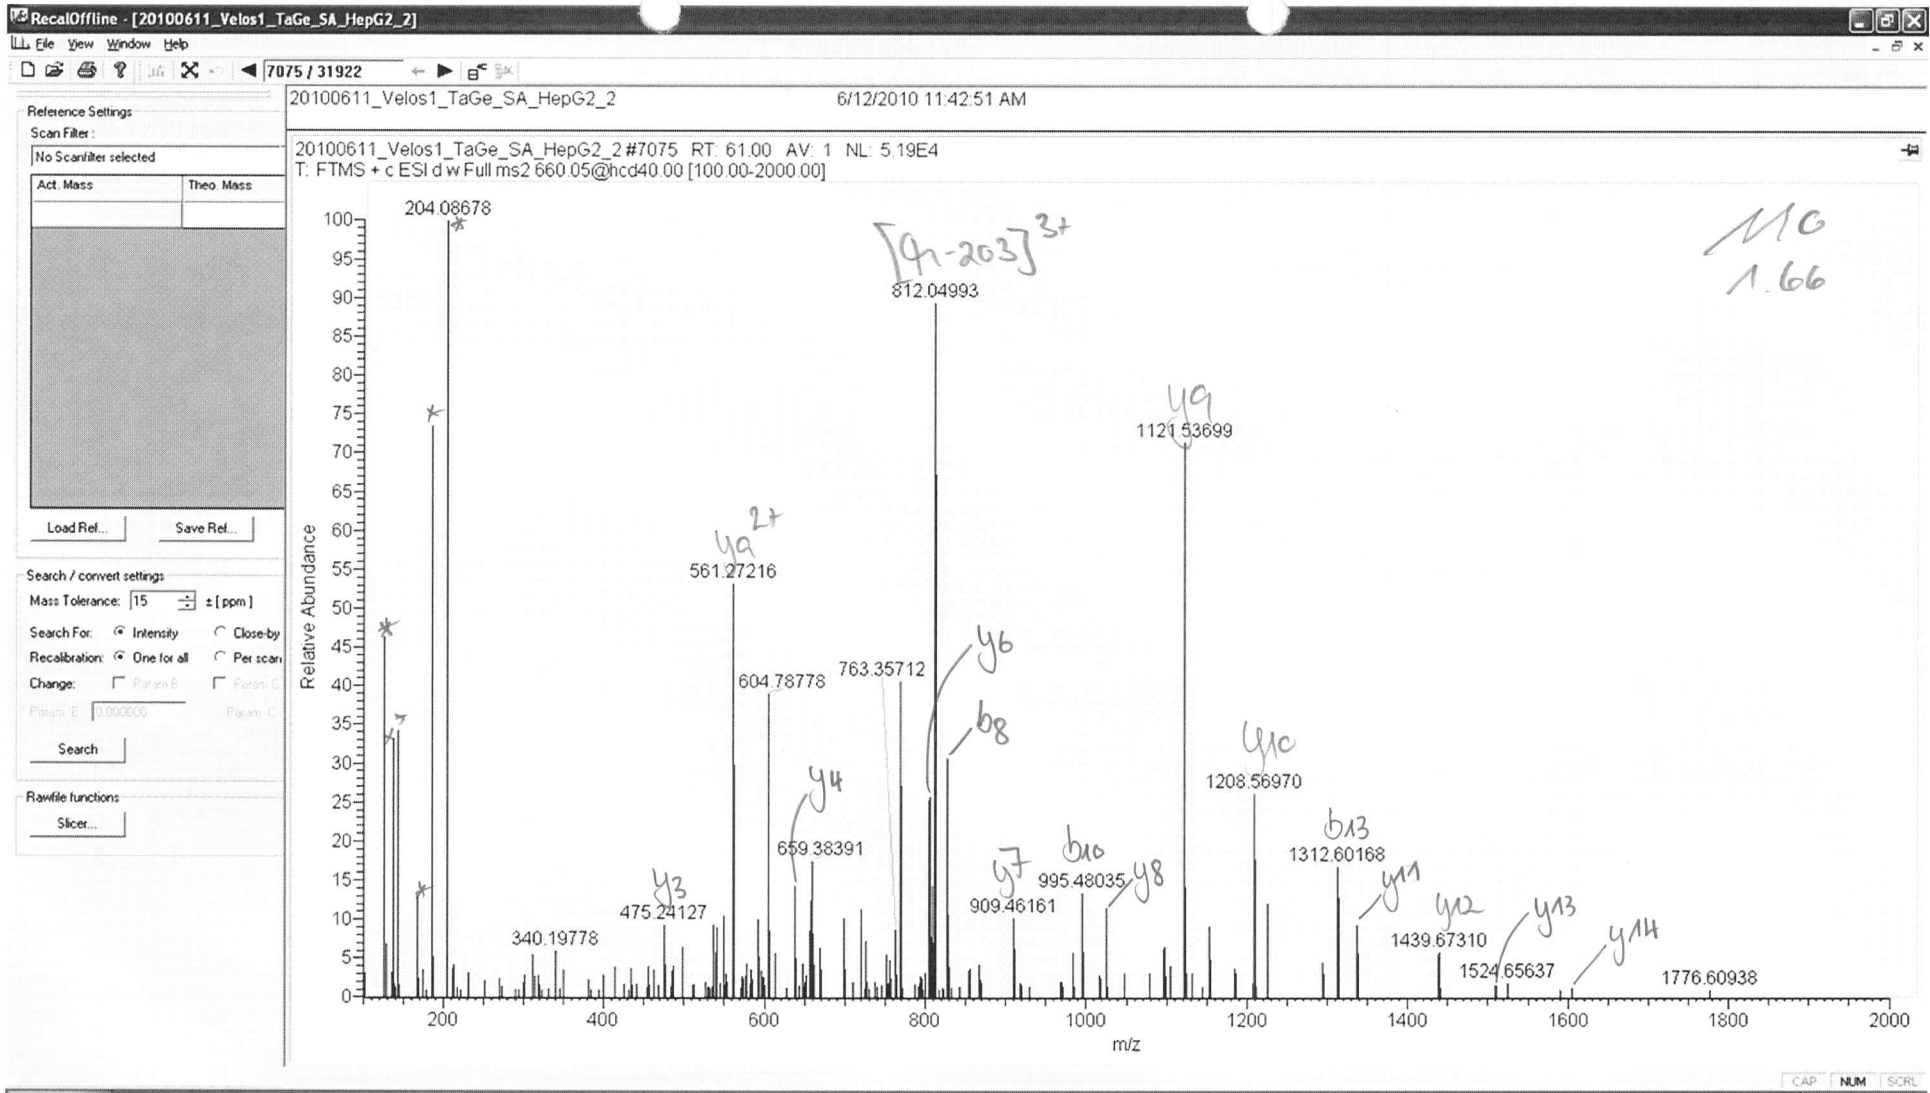

y4 y9 y10 y7  
GAPNKEETPATESPDtGLYYHR

no site evidence

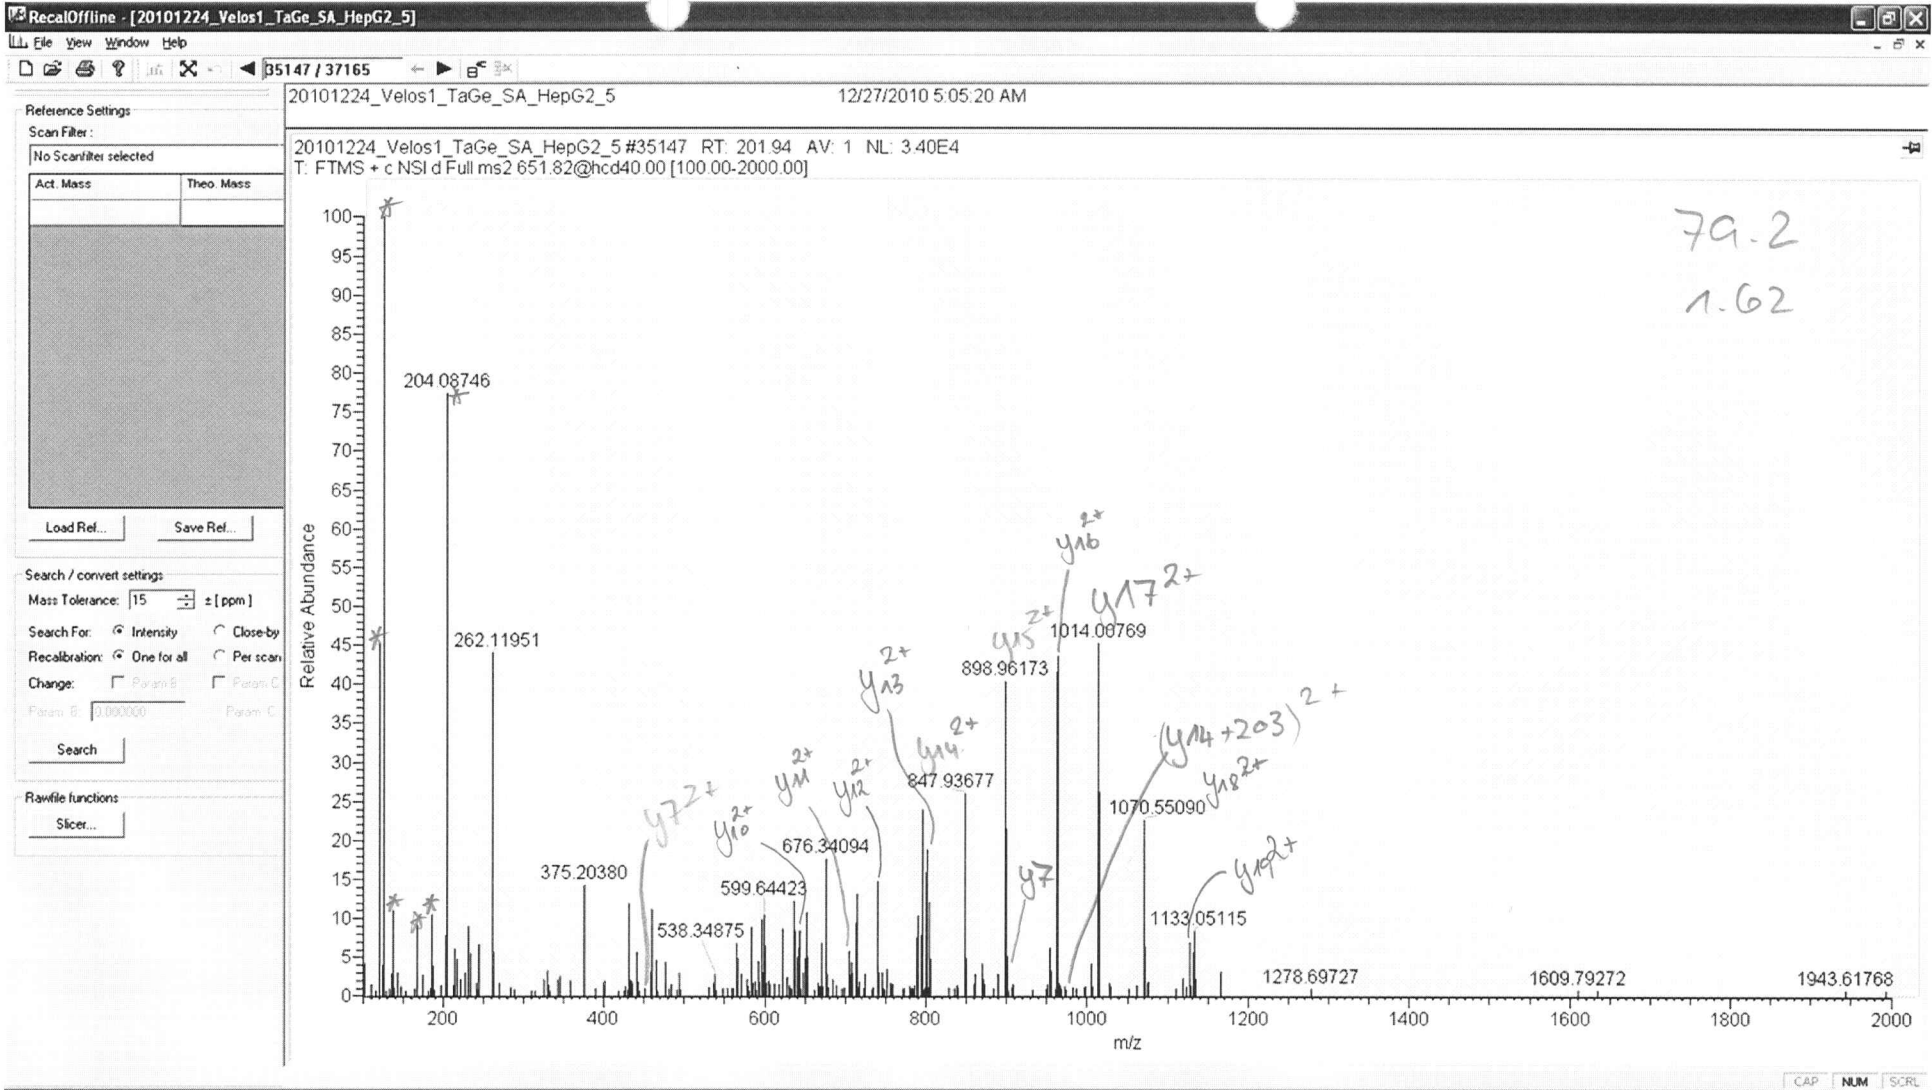

<sup>y14</sup>  
<sup>y7</sup>  
FNLTETSEAEIHQSFQHLLR

S7 or S14

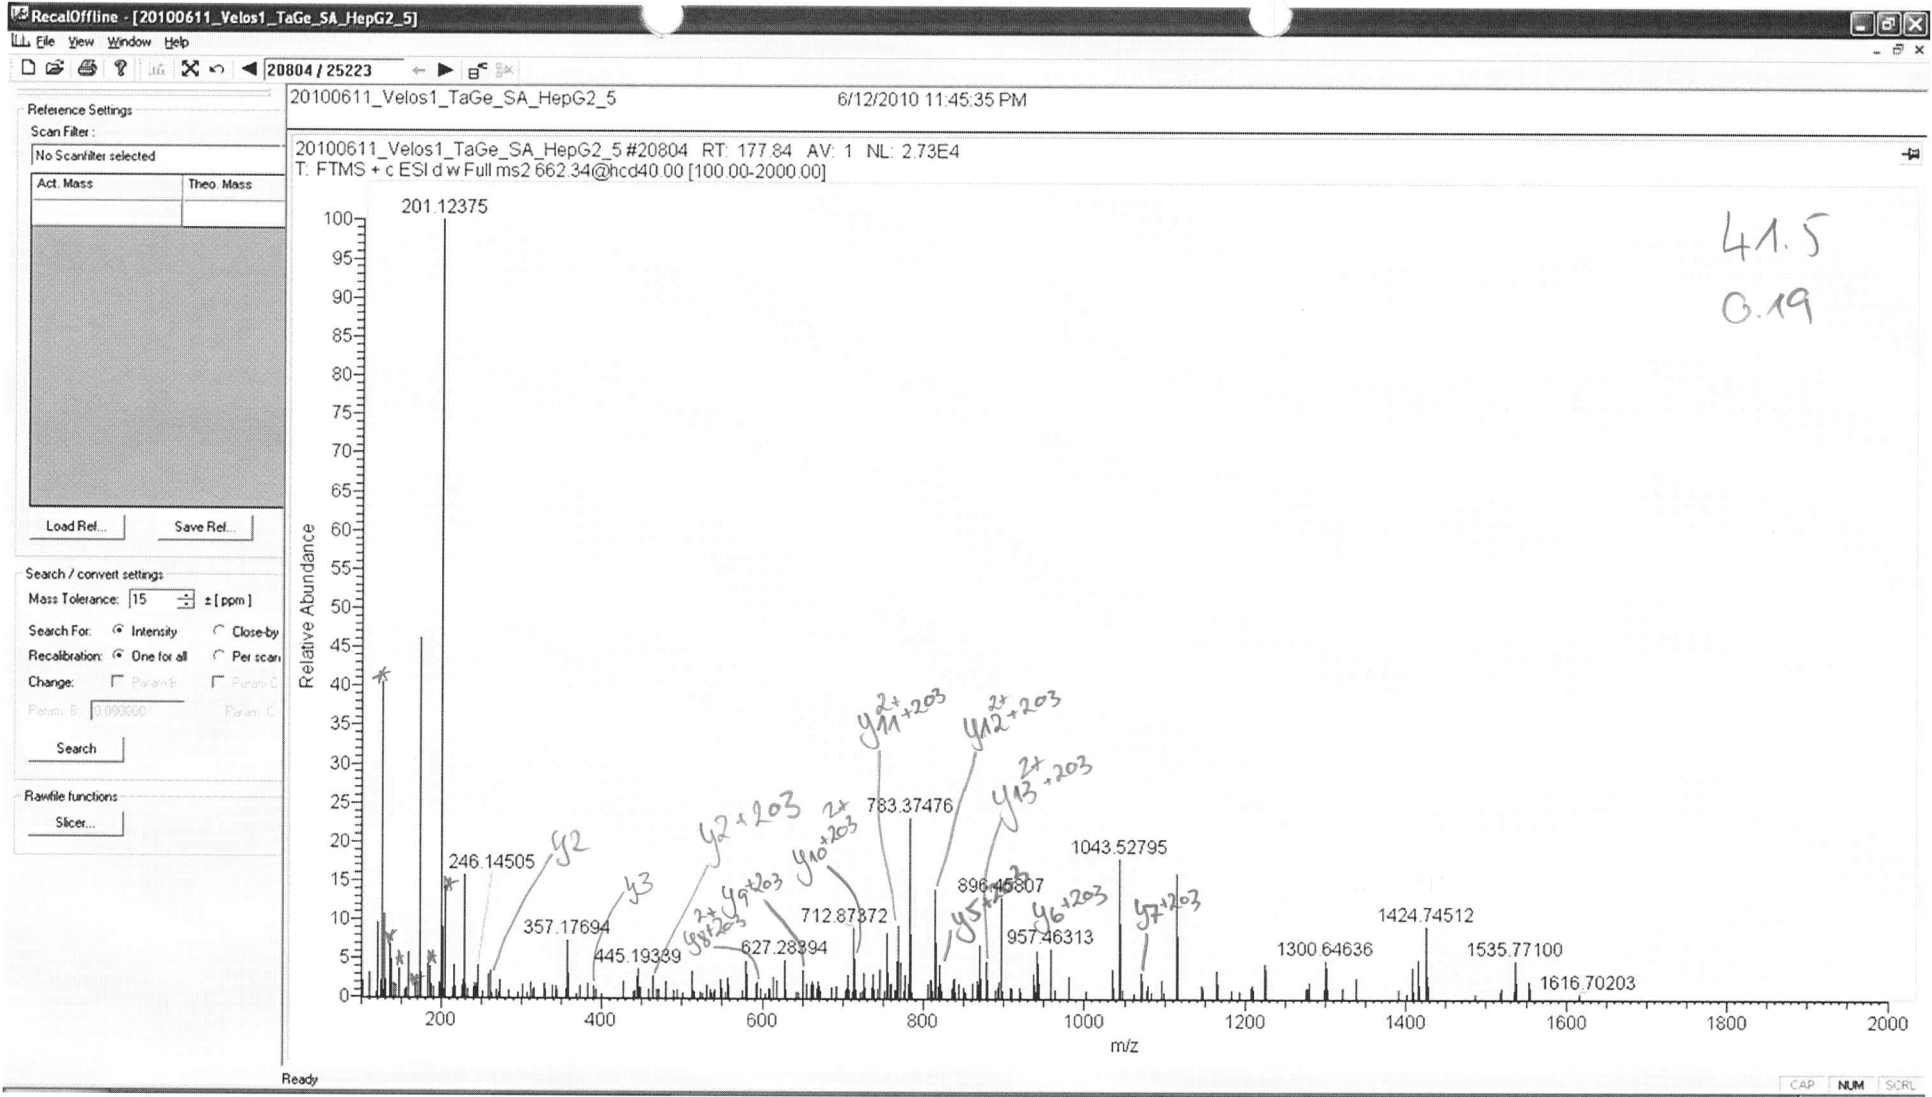

DLQSLEDILHQVENK

y2+207

N14



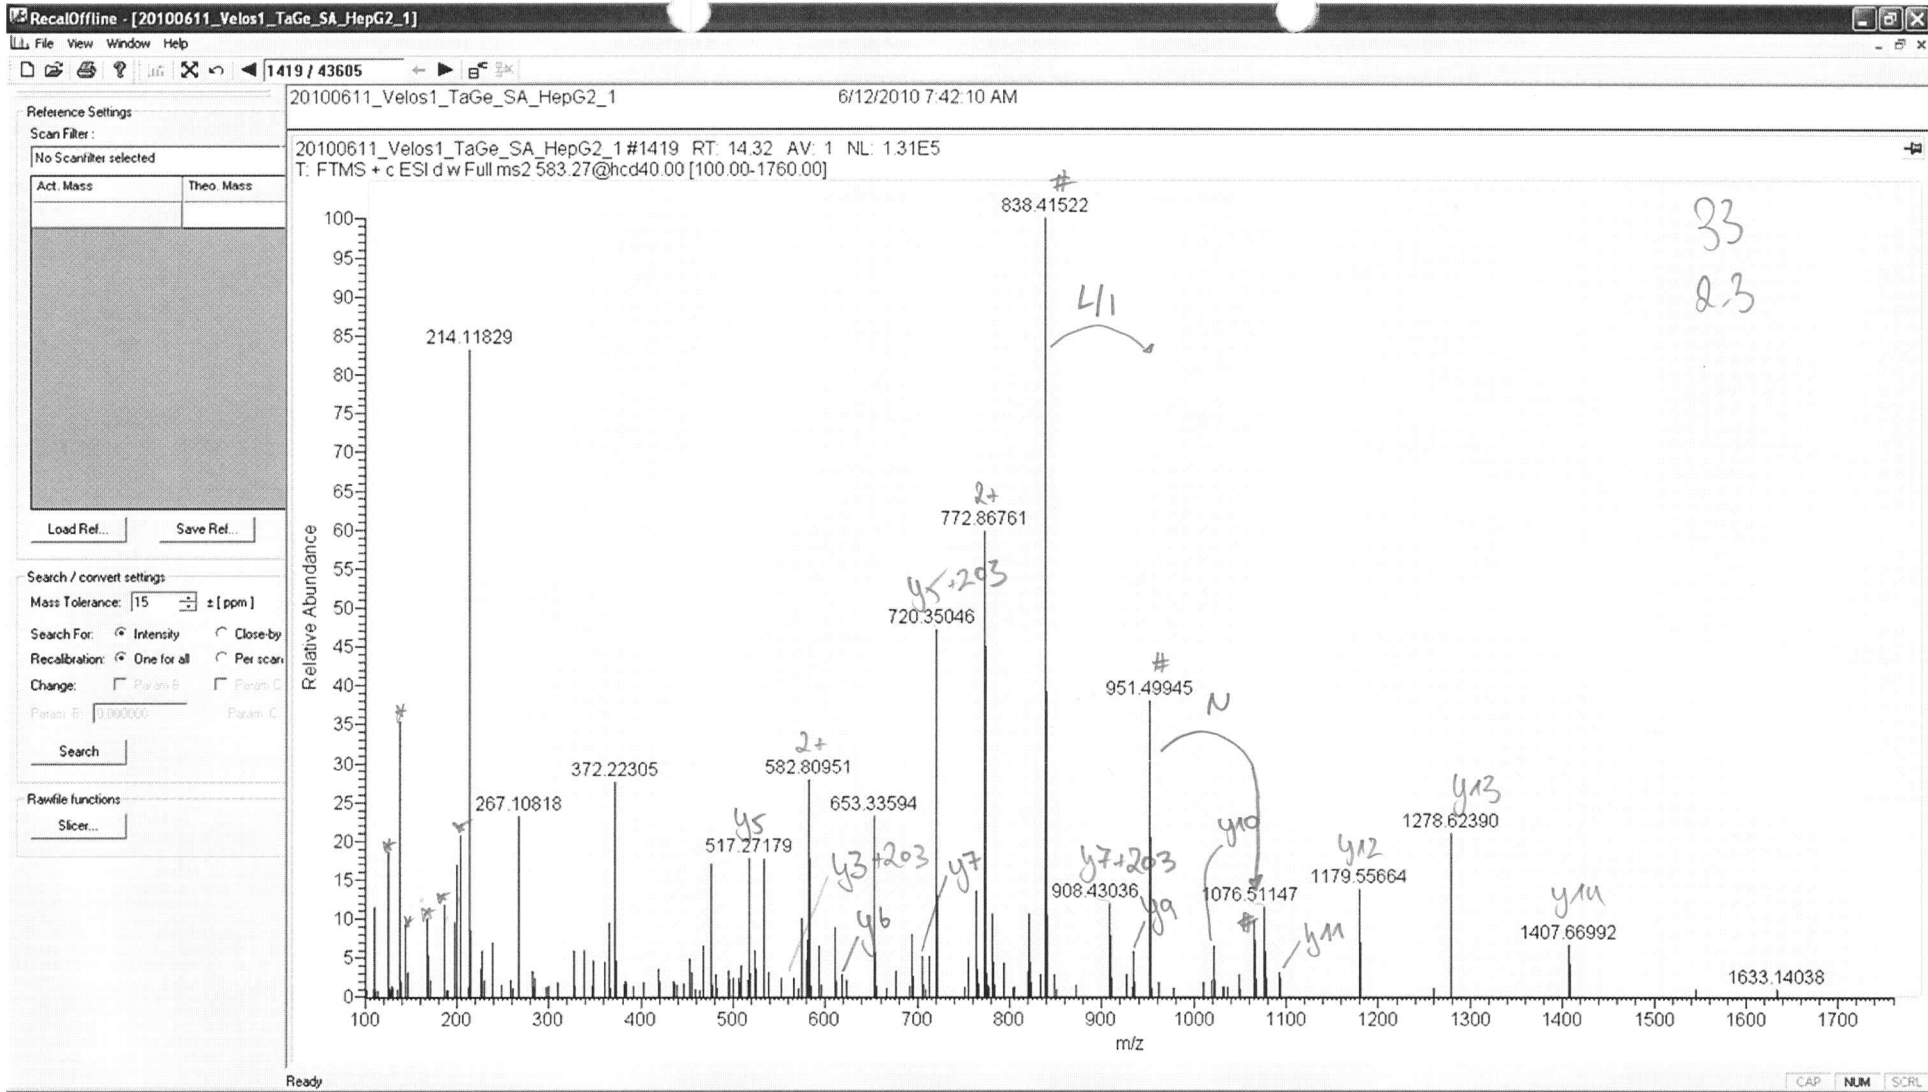

HEVSASTQSTPASSR

Site: 313 or 314

# chimeric spectrum;  
2nd ion series



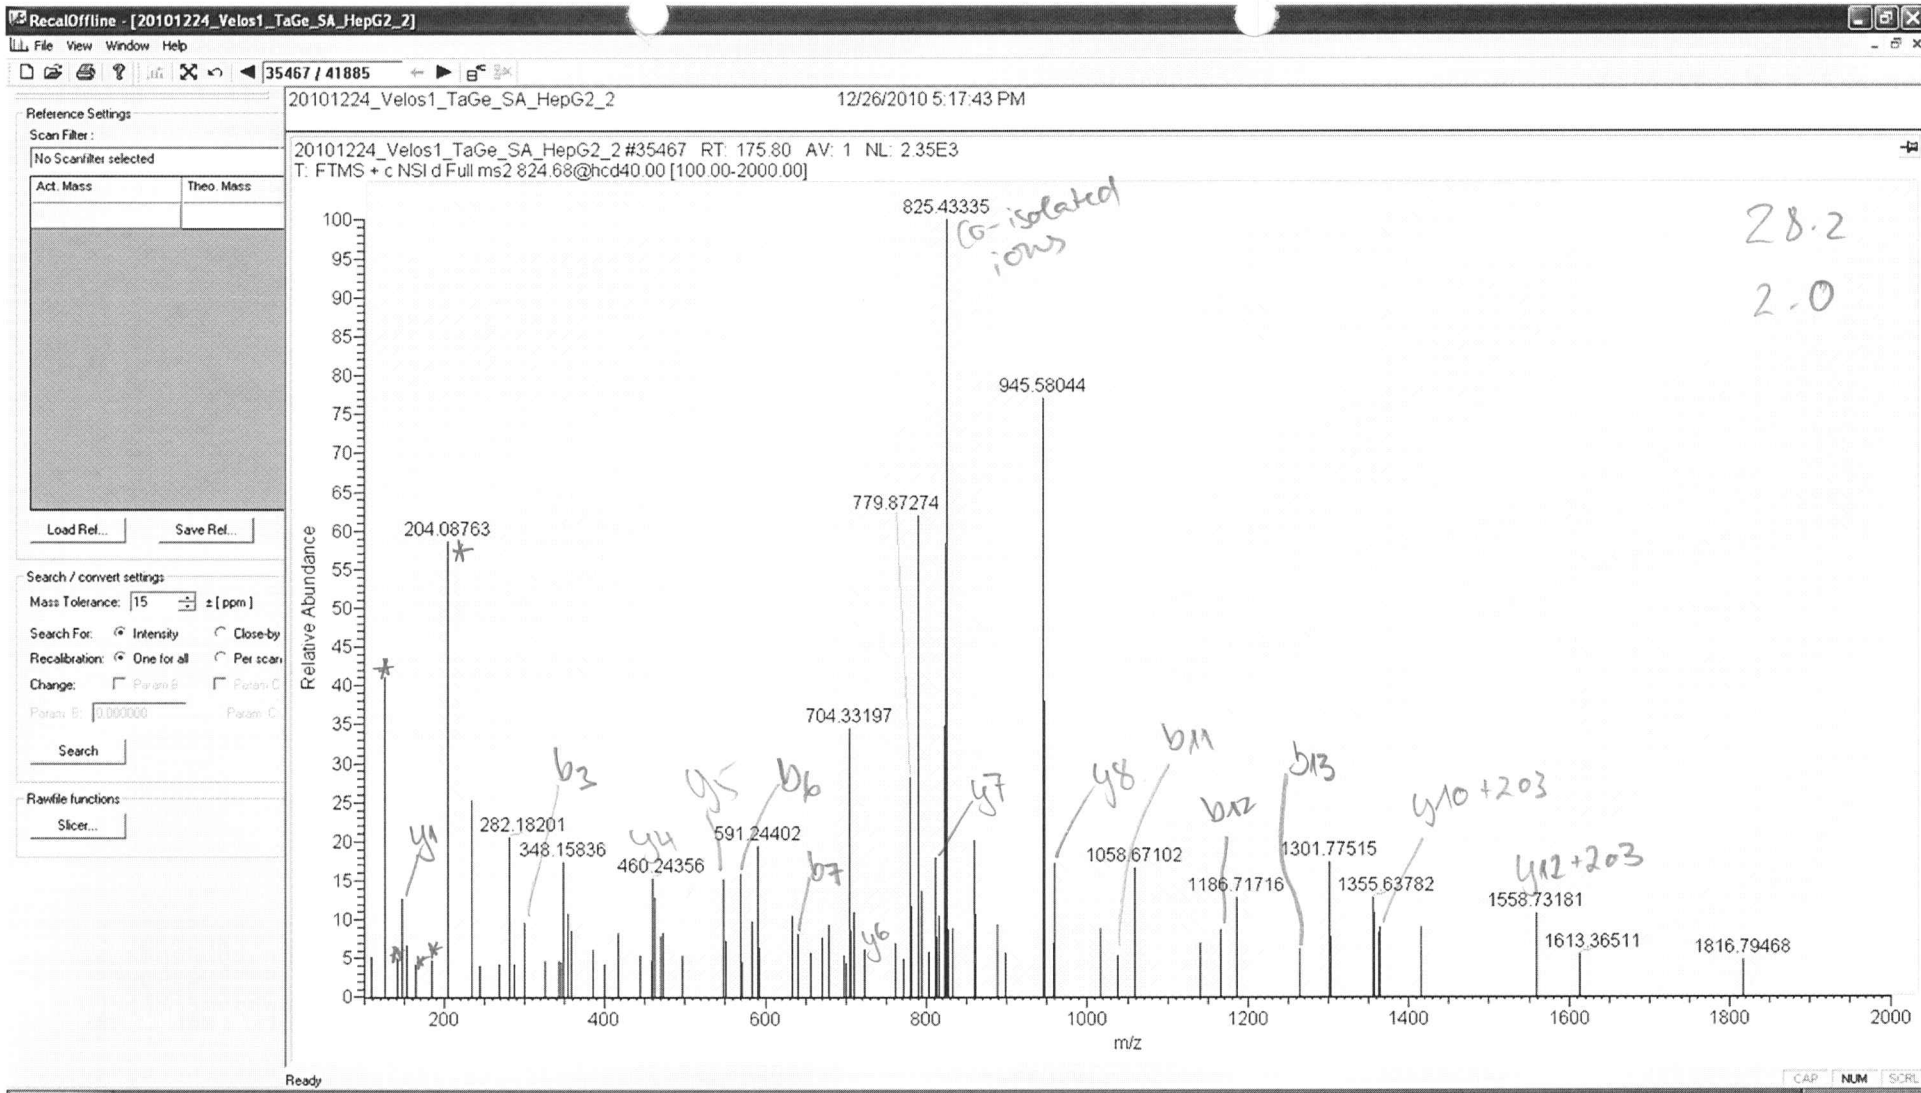

VTVLGVATAPQQVLSNGVPVSnFTYSPDTK

S21 or N22

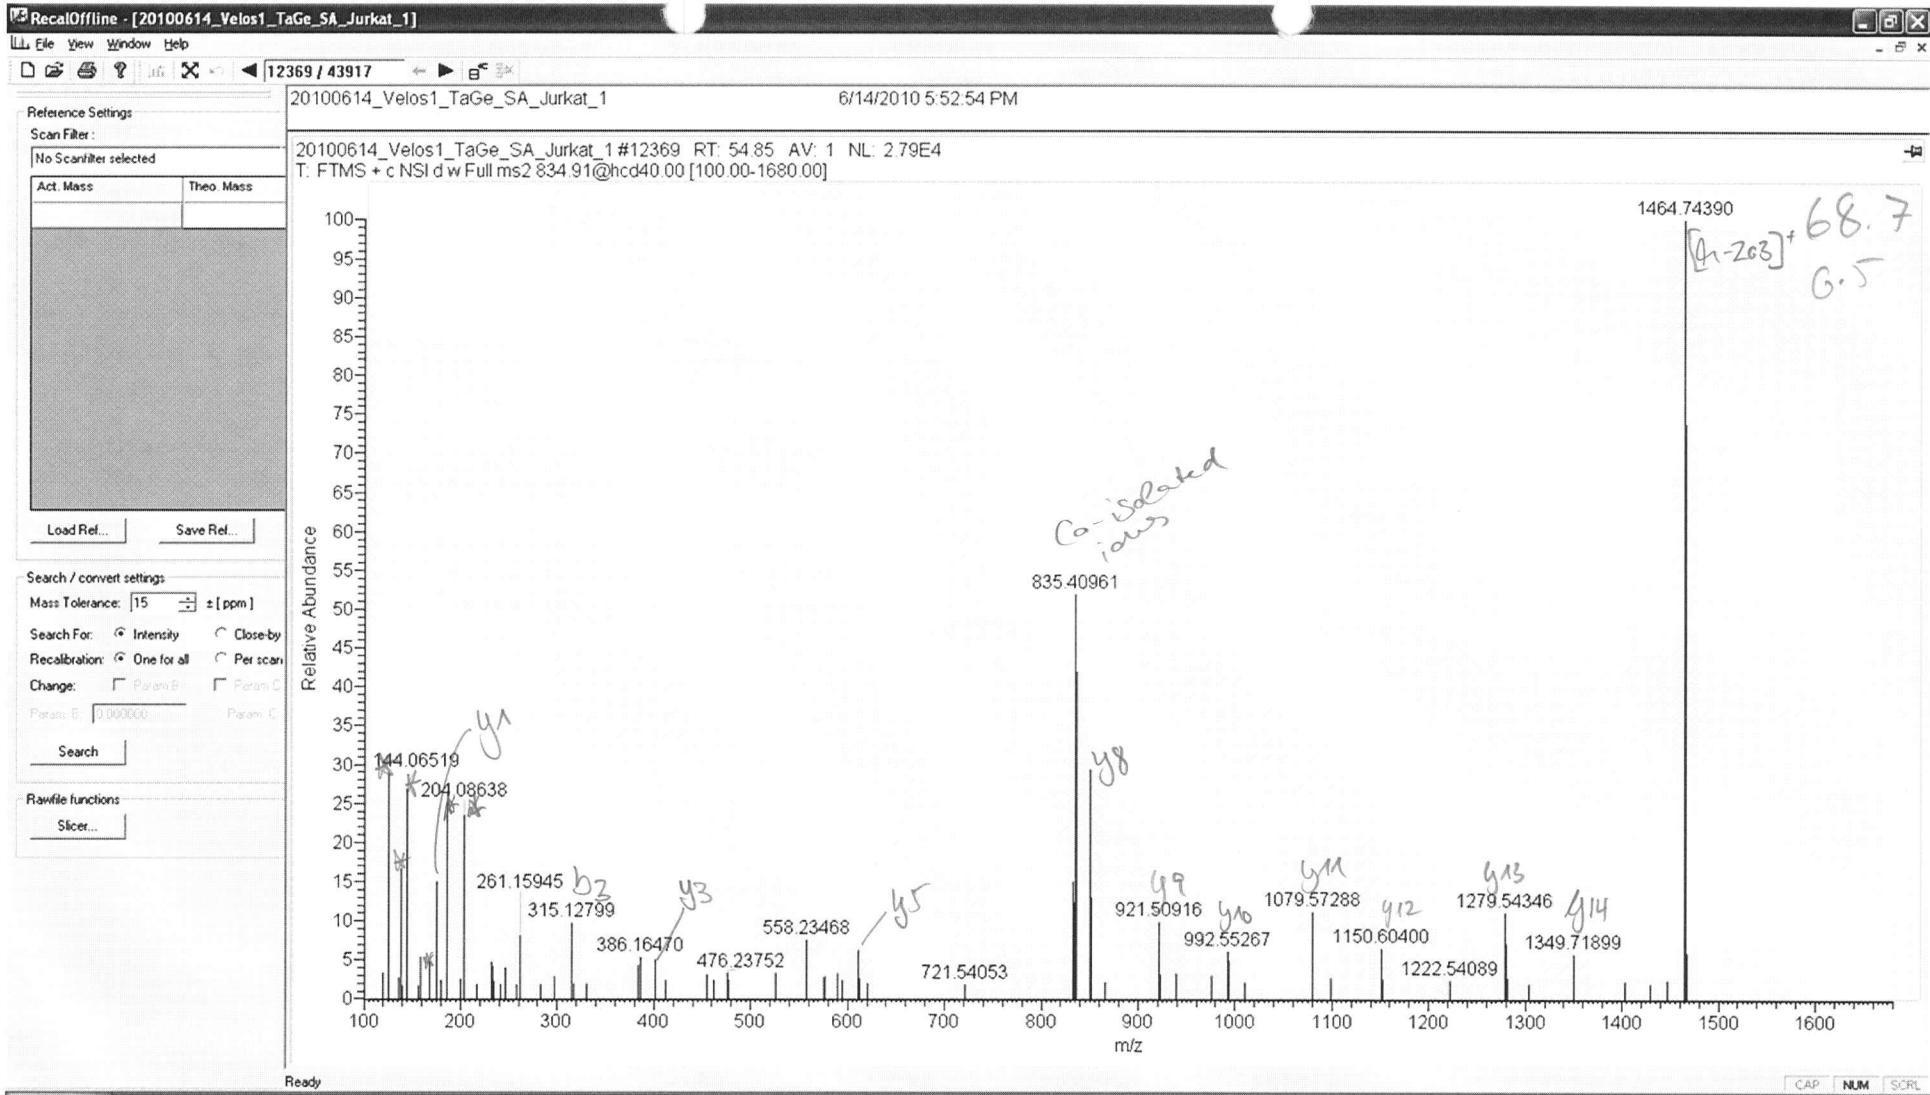

DAQAsAAPAAPLPER

← y8 y5

S5

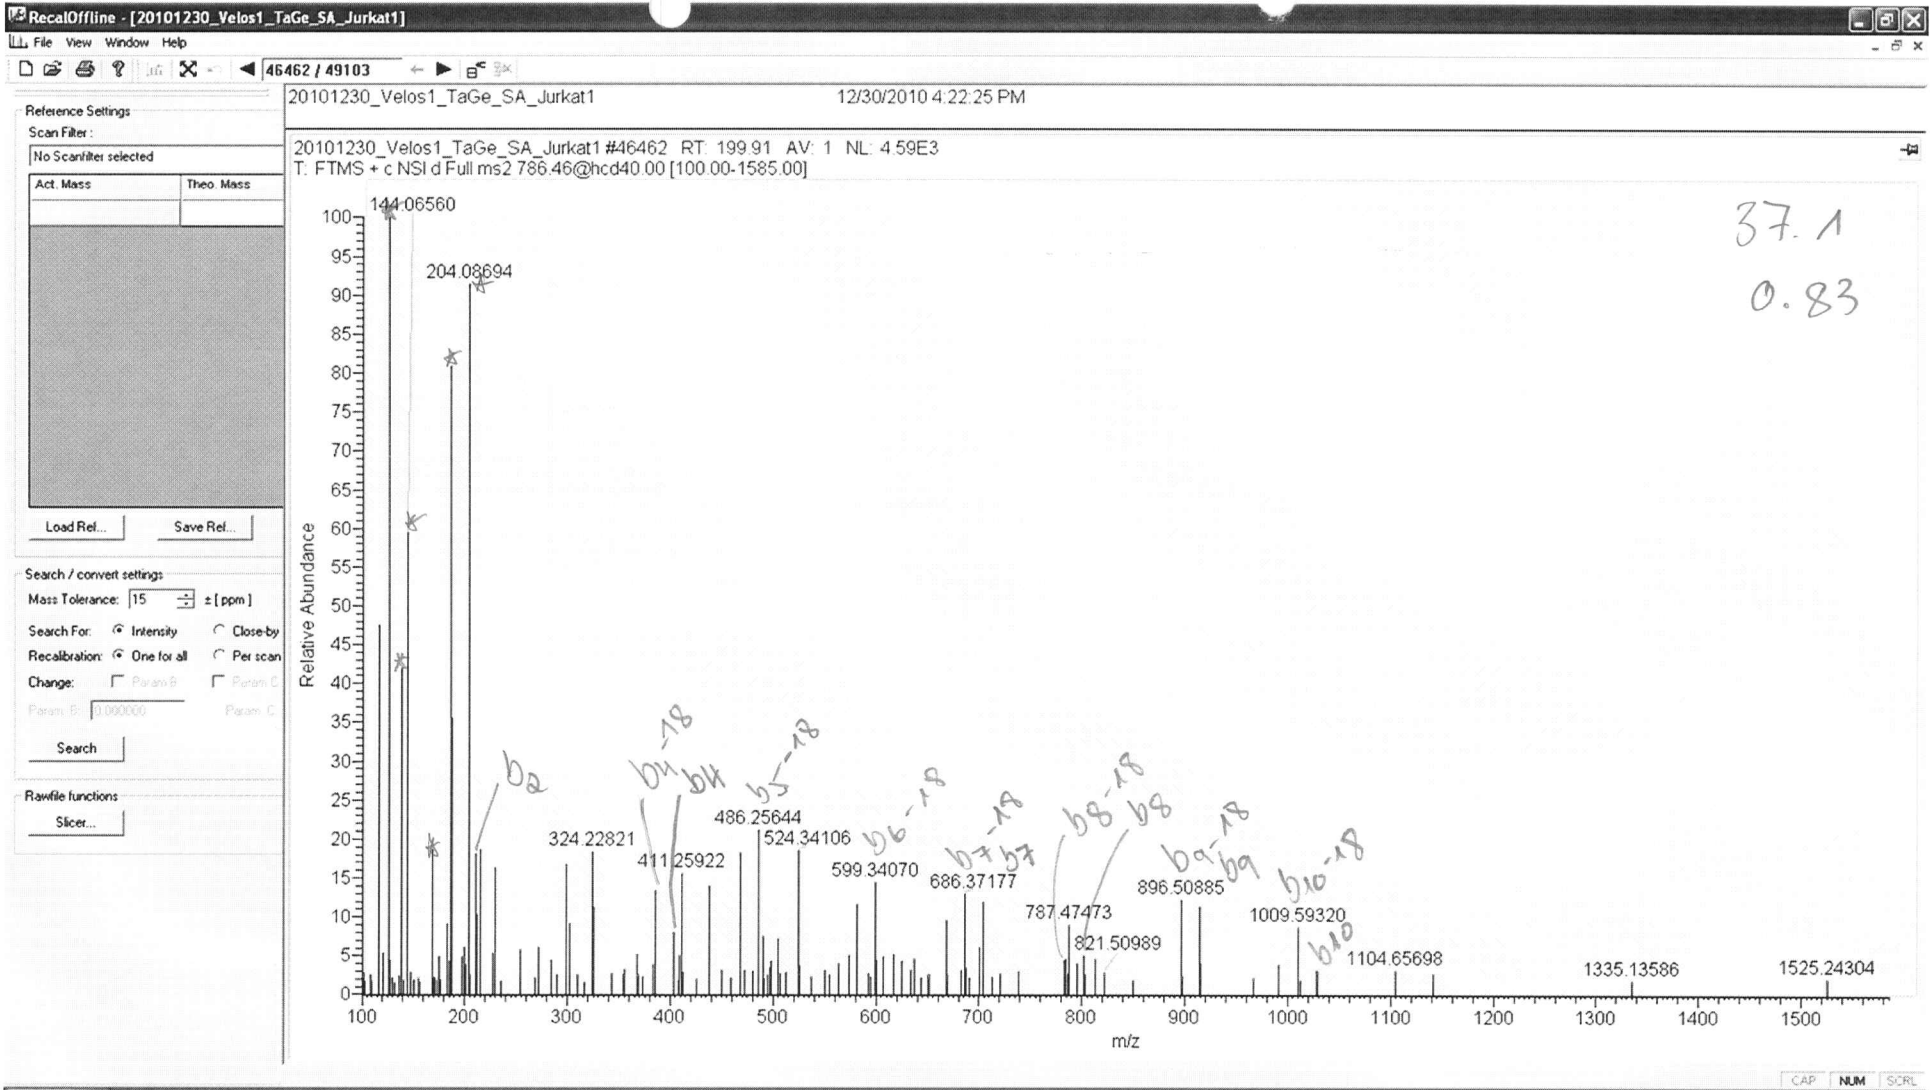

TIS<sup>t</sup>TISPLLLIP

No site  
evidence

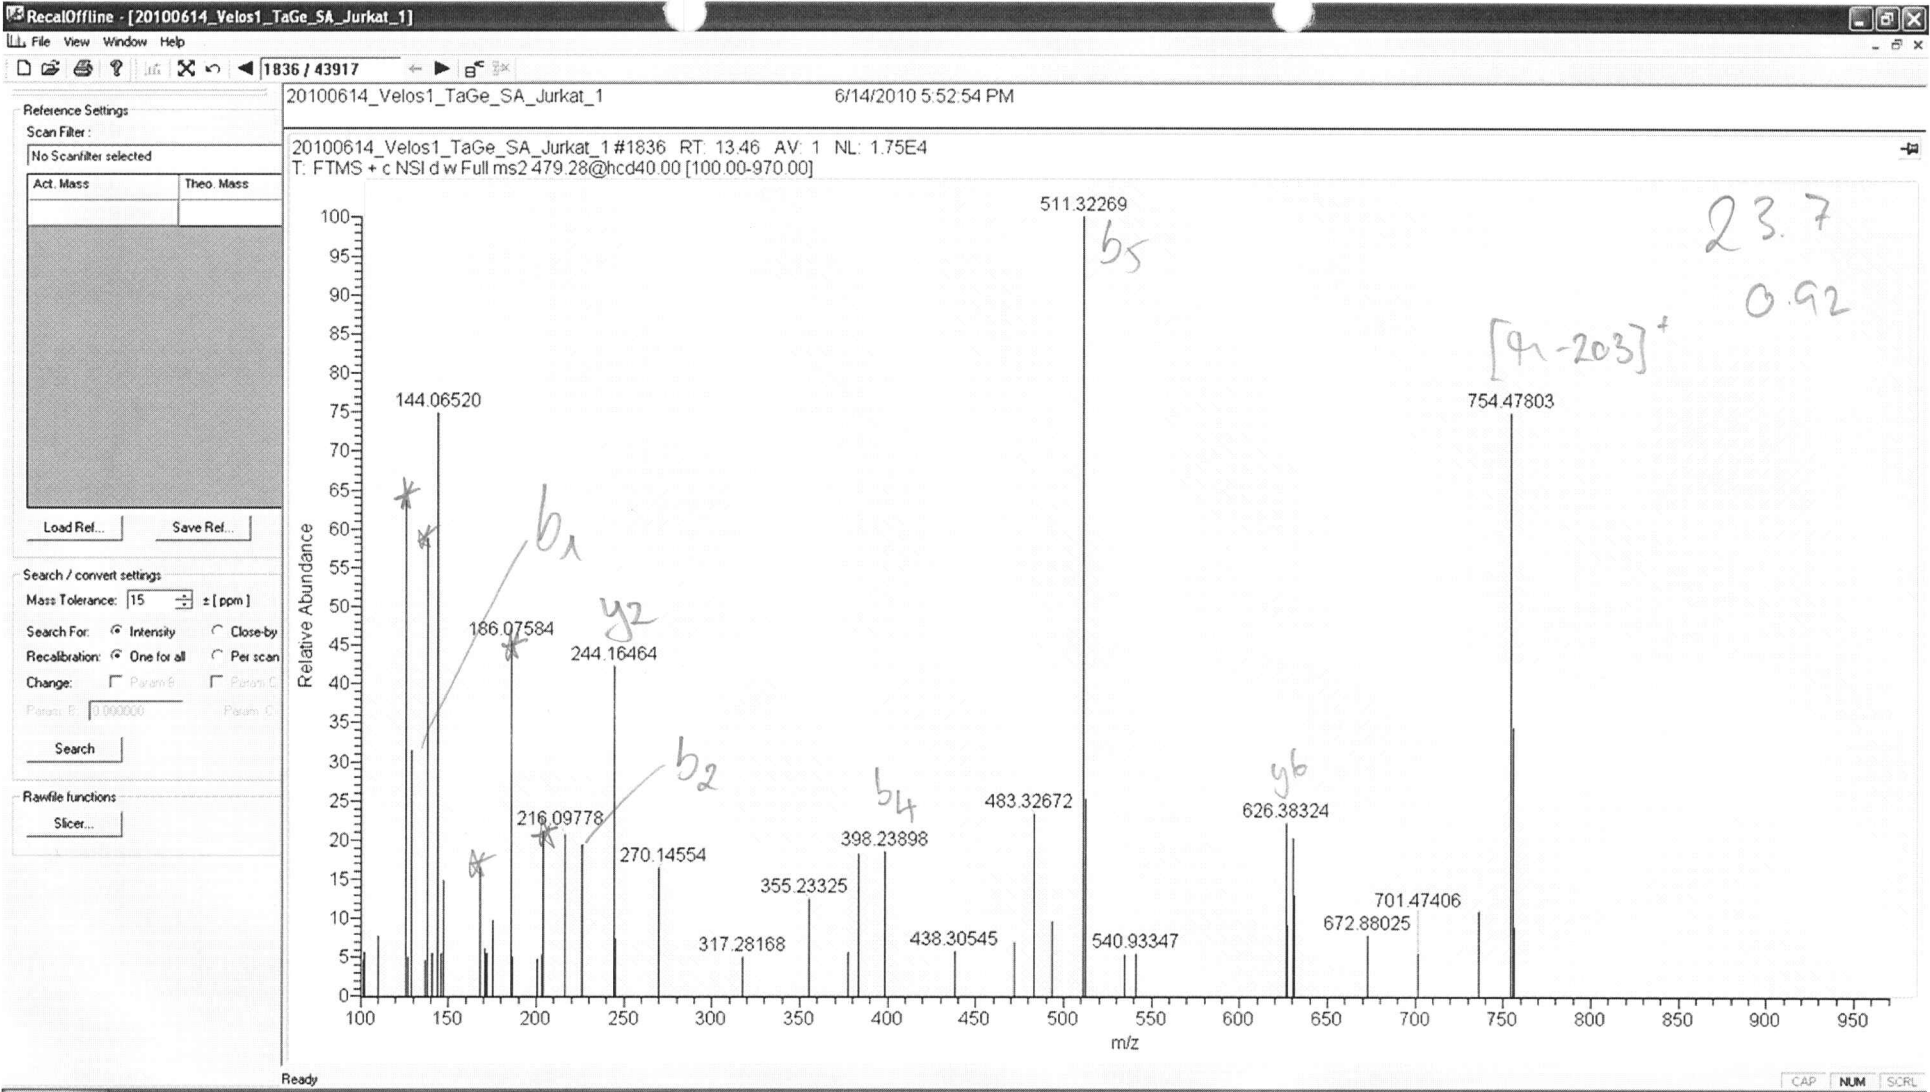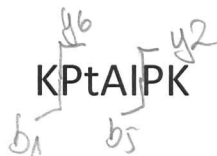

T3

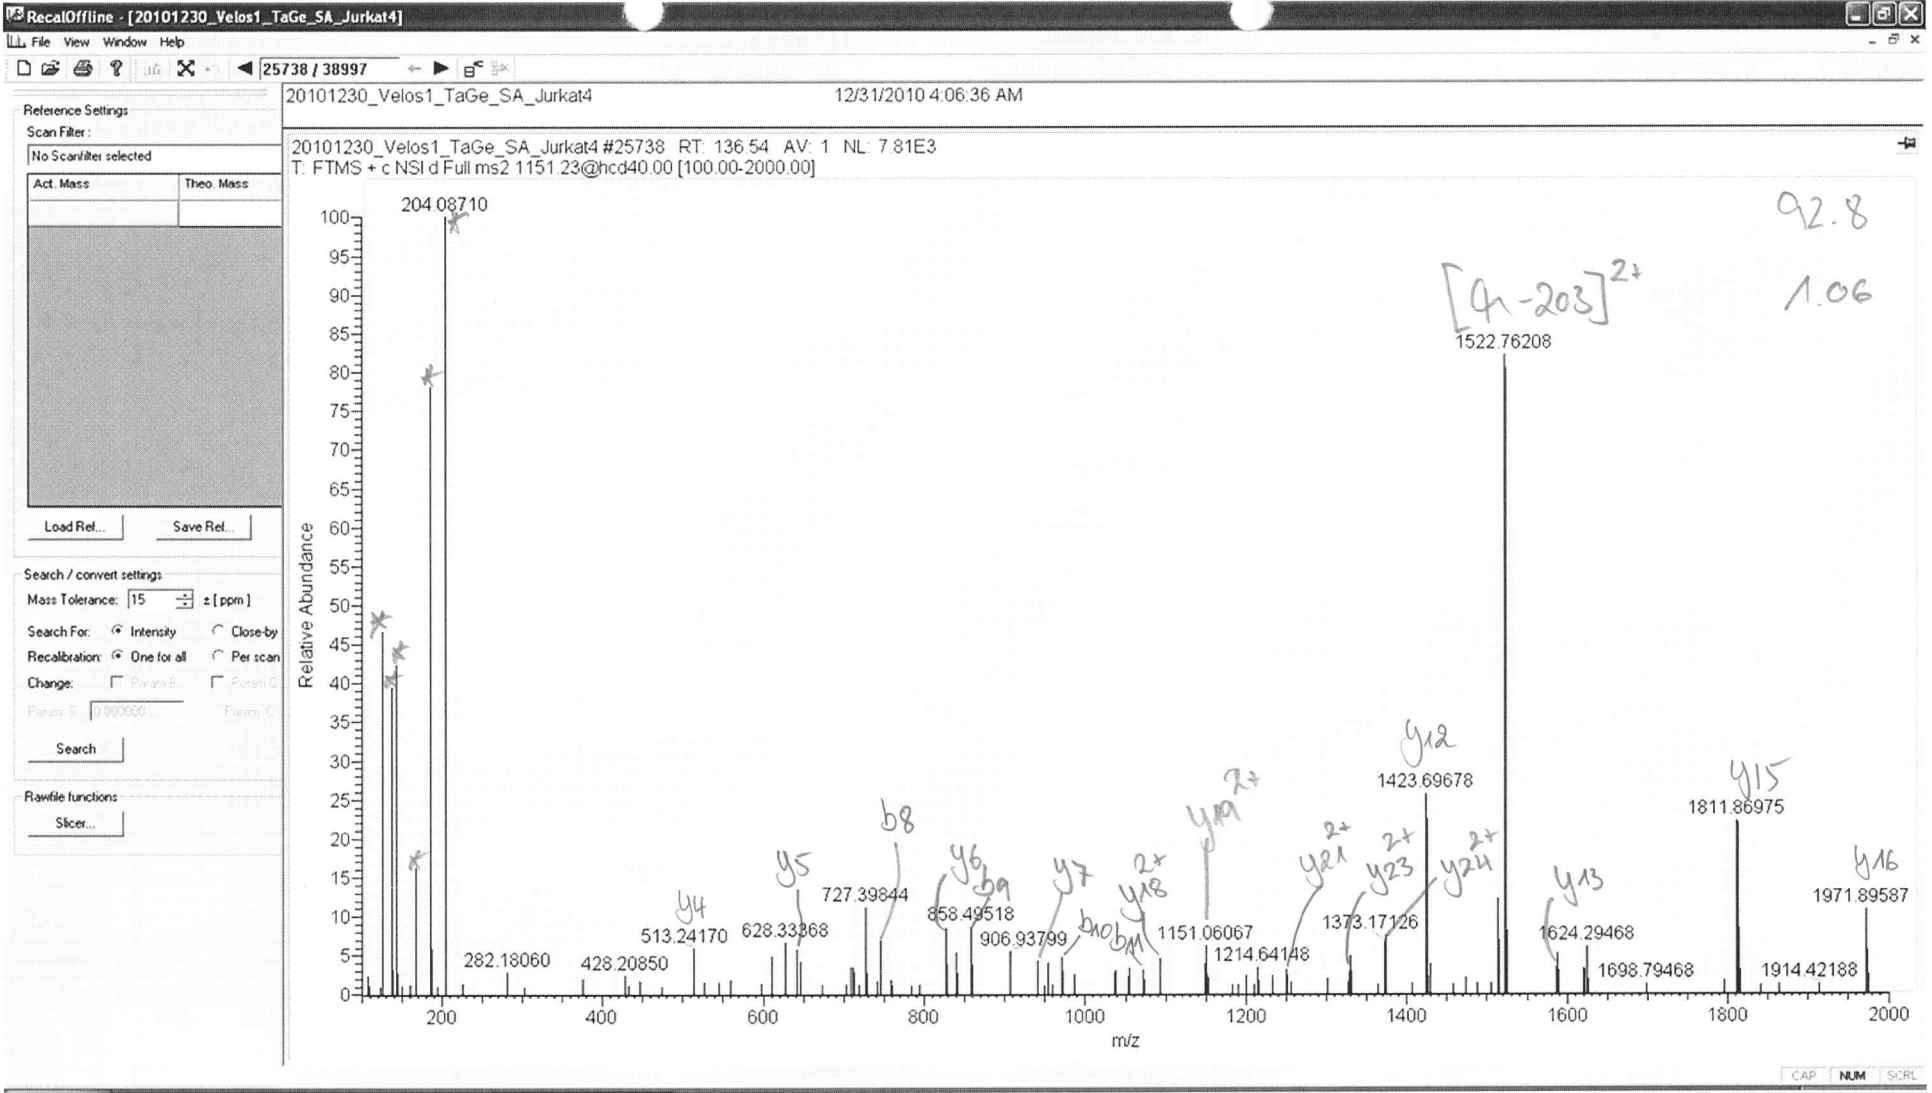

VSISGTTVILTcPQYPGsEILWQHnDK

no site evidence

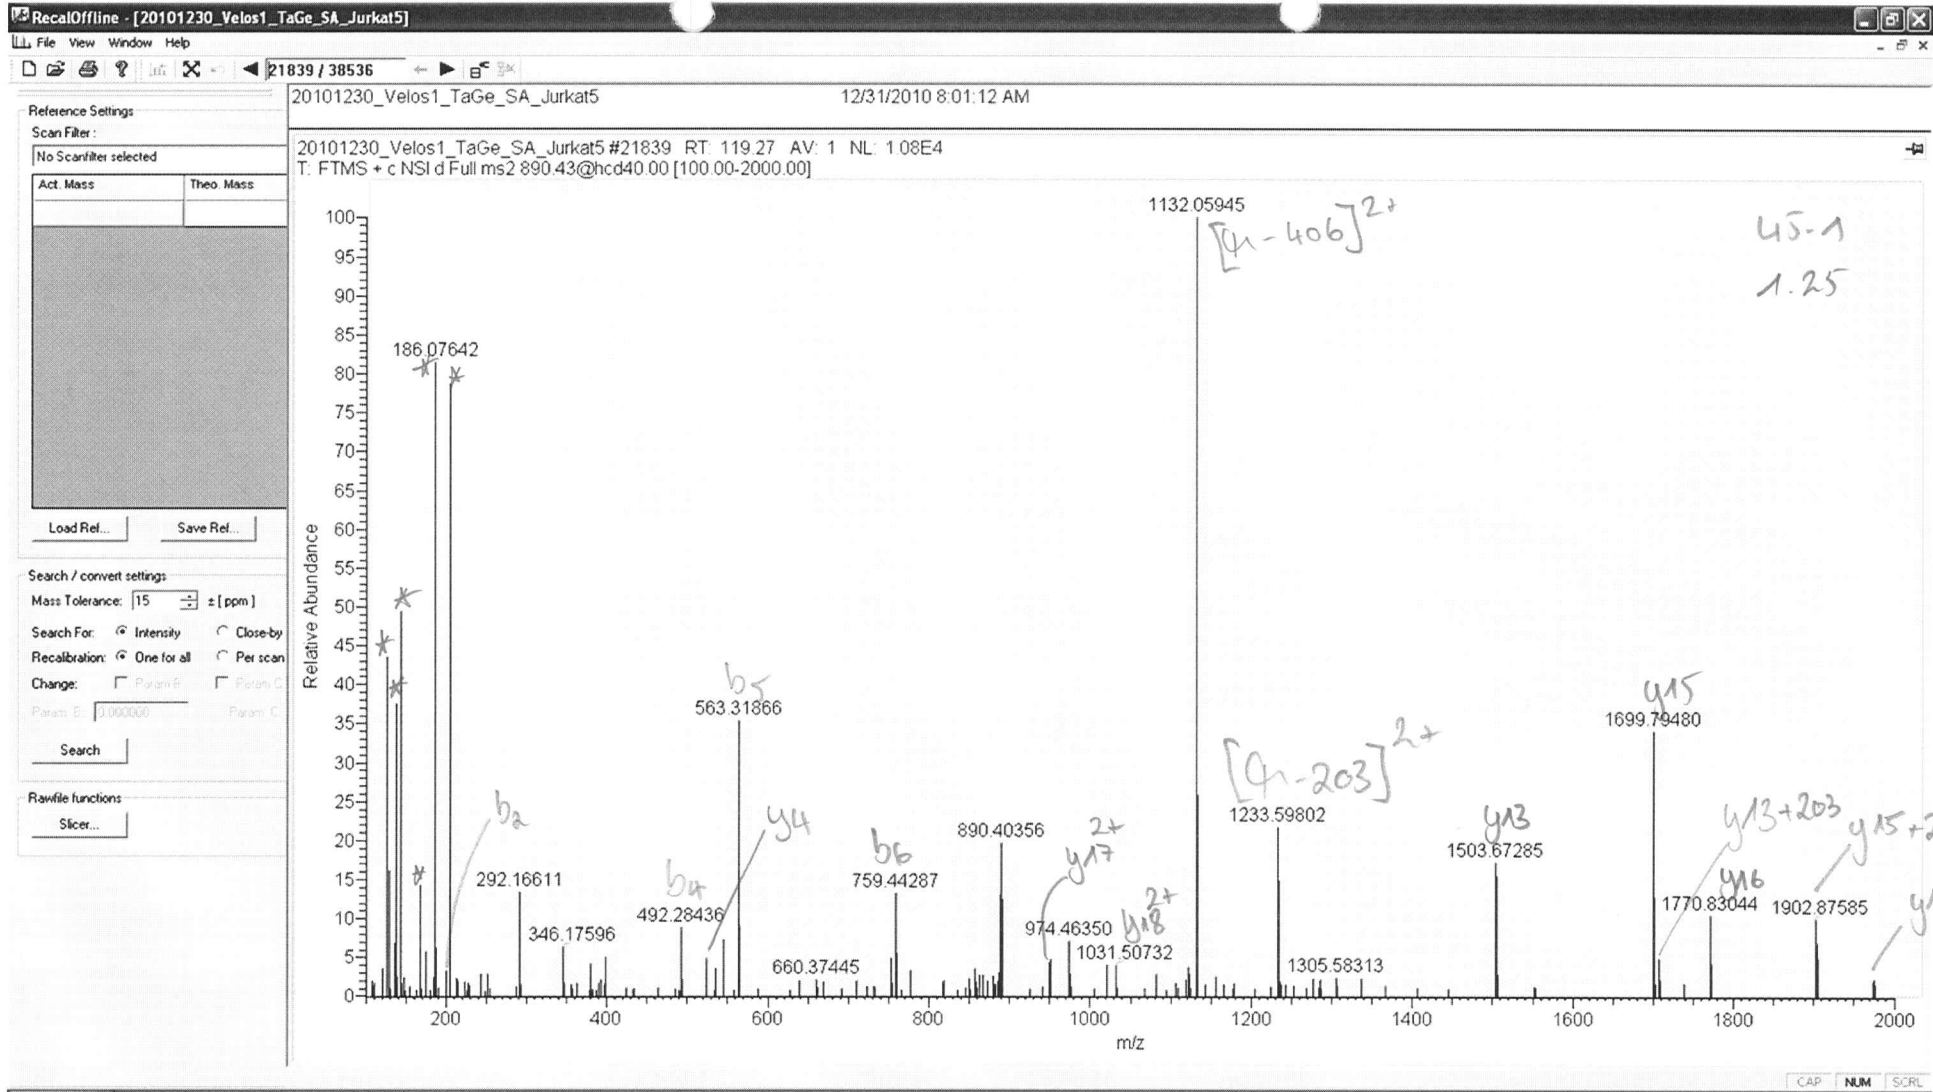

$\begin{matrix} & & y_{15} & & \\ & & / & & \\ & & y_{13} & & \\ & & / & & \\ b_5 & & & & \end{matrix}$   
 VTYKAPVPtGEVYFADsFDR

T9 and S17

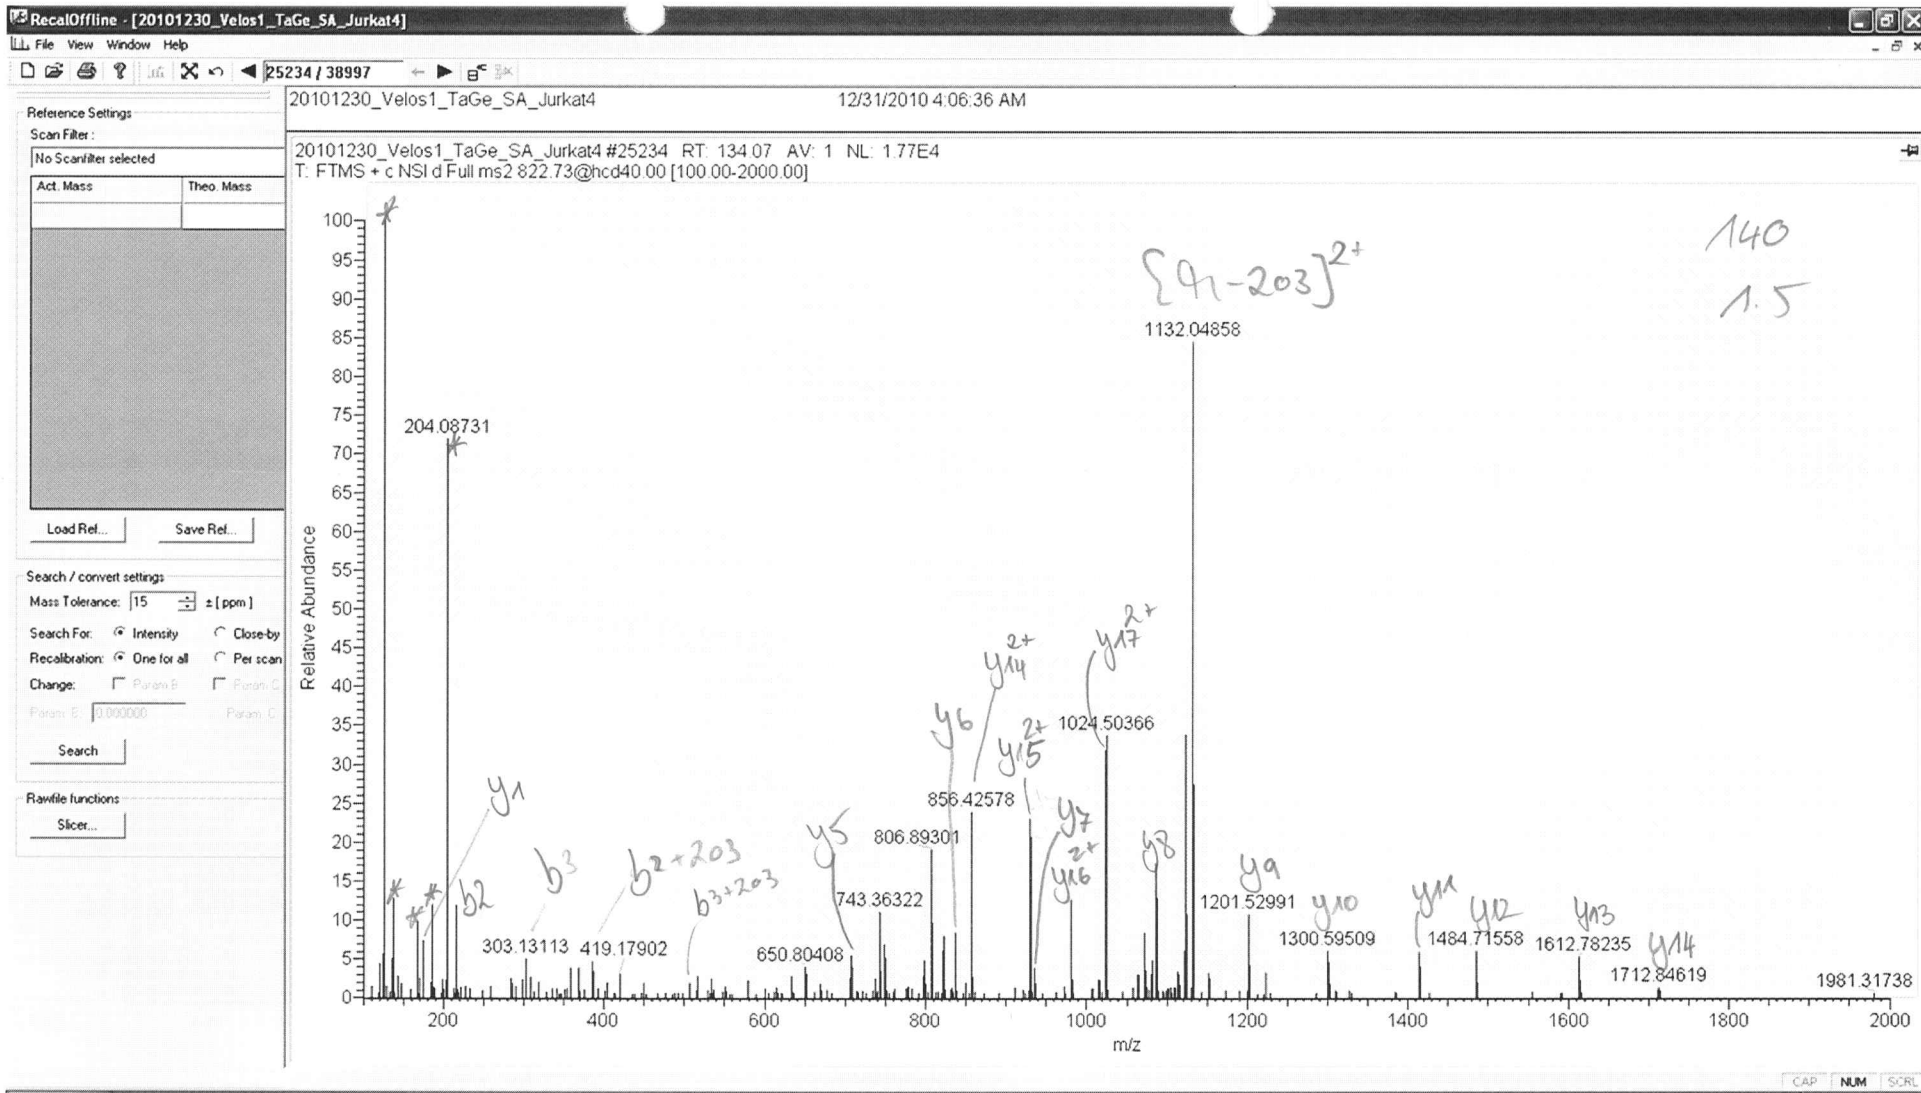

TNStFVQALVEHVKEEcDR

b2 b3

N2

61







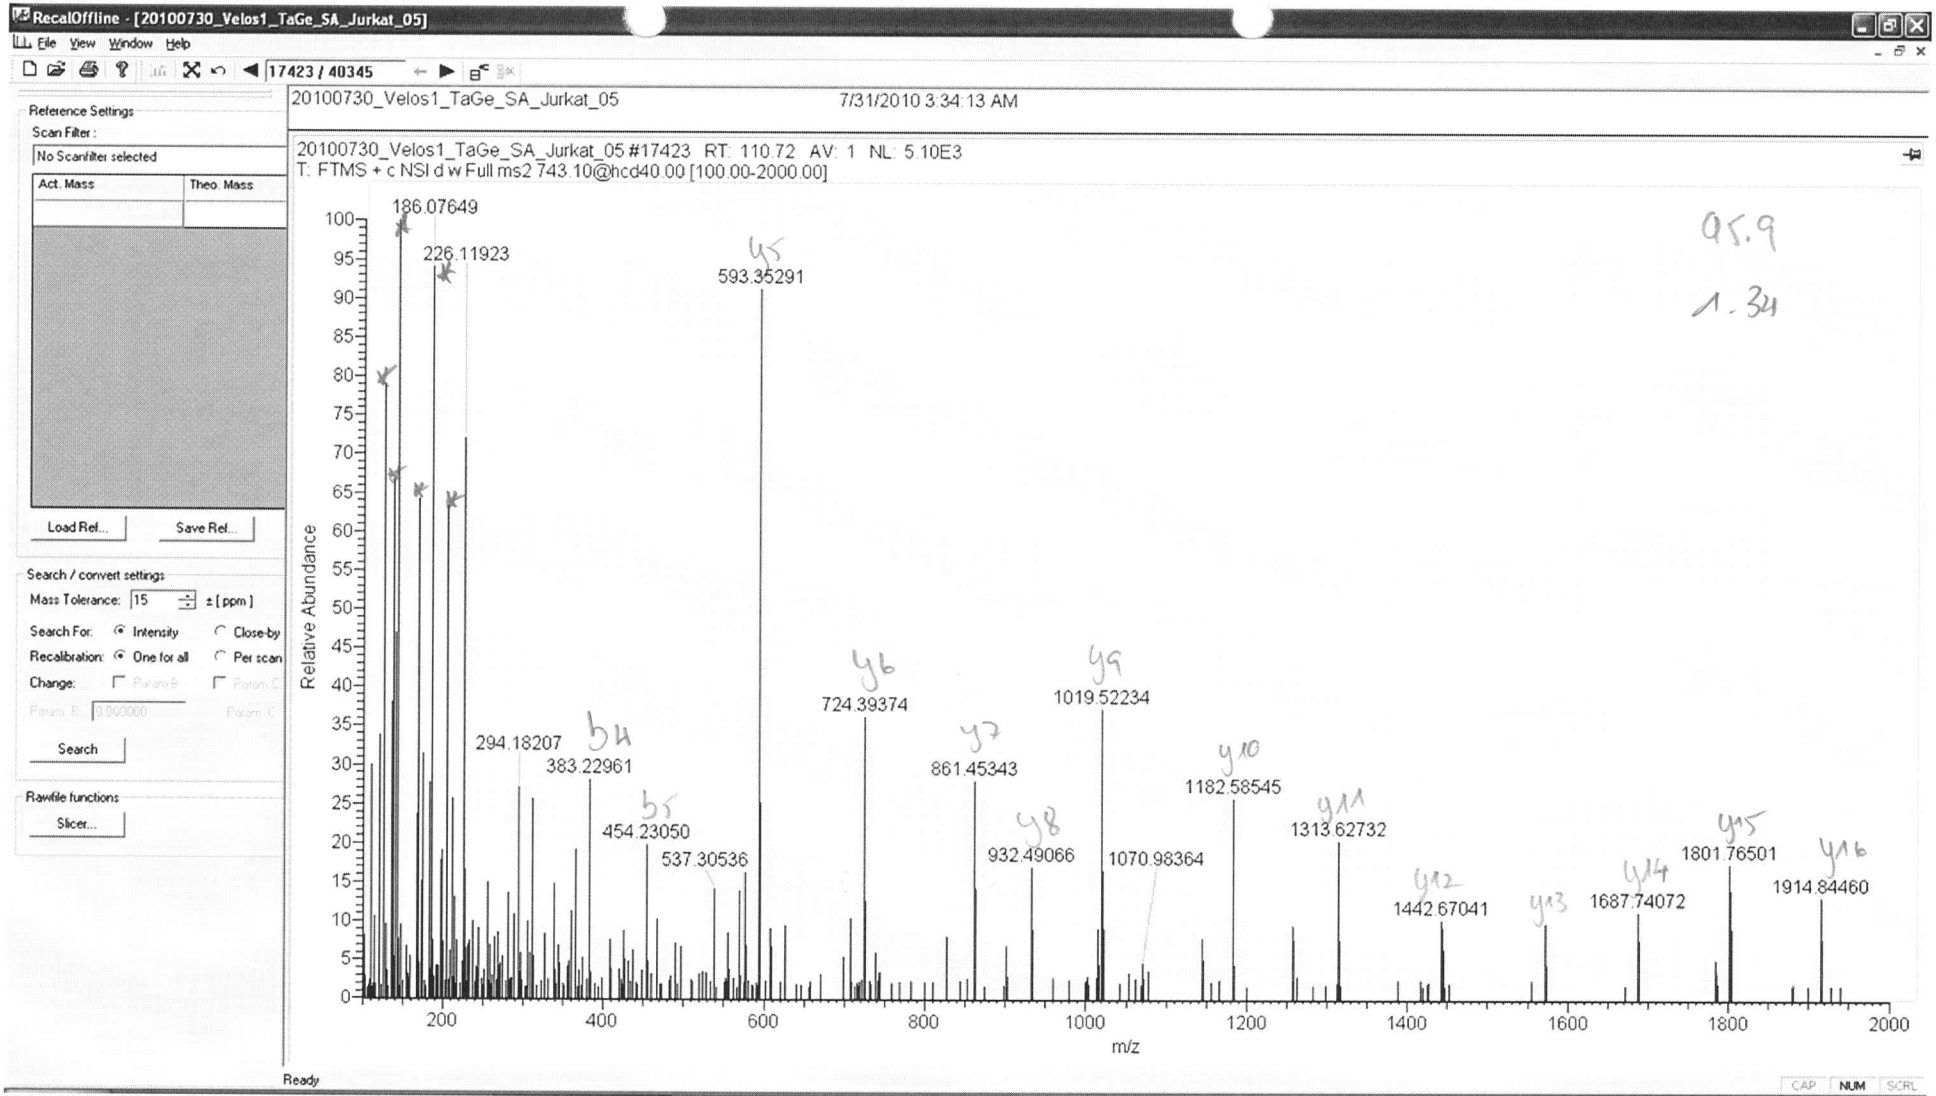

APLTATAPQLDDEEMYsAHMPAHLR

no site evidence

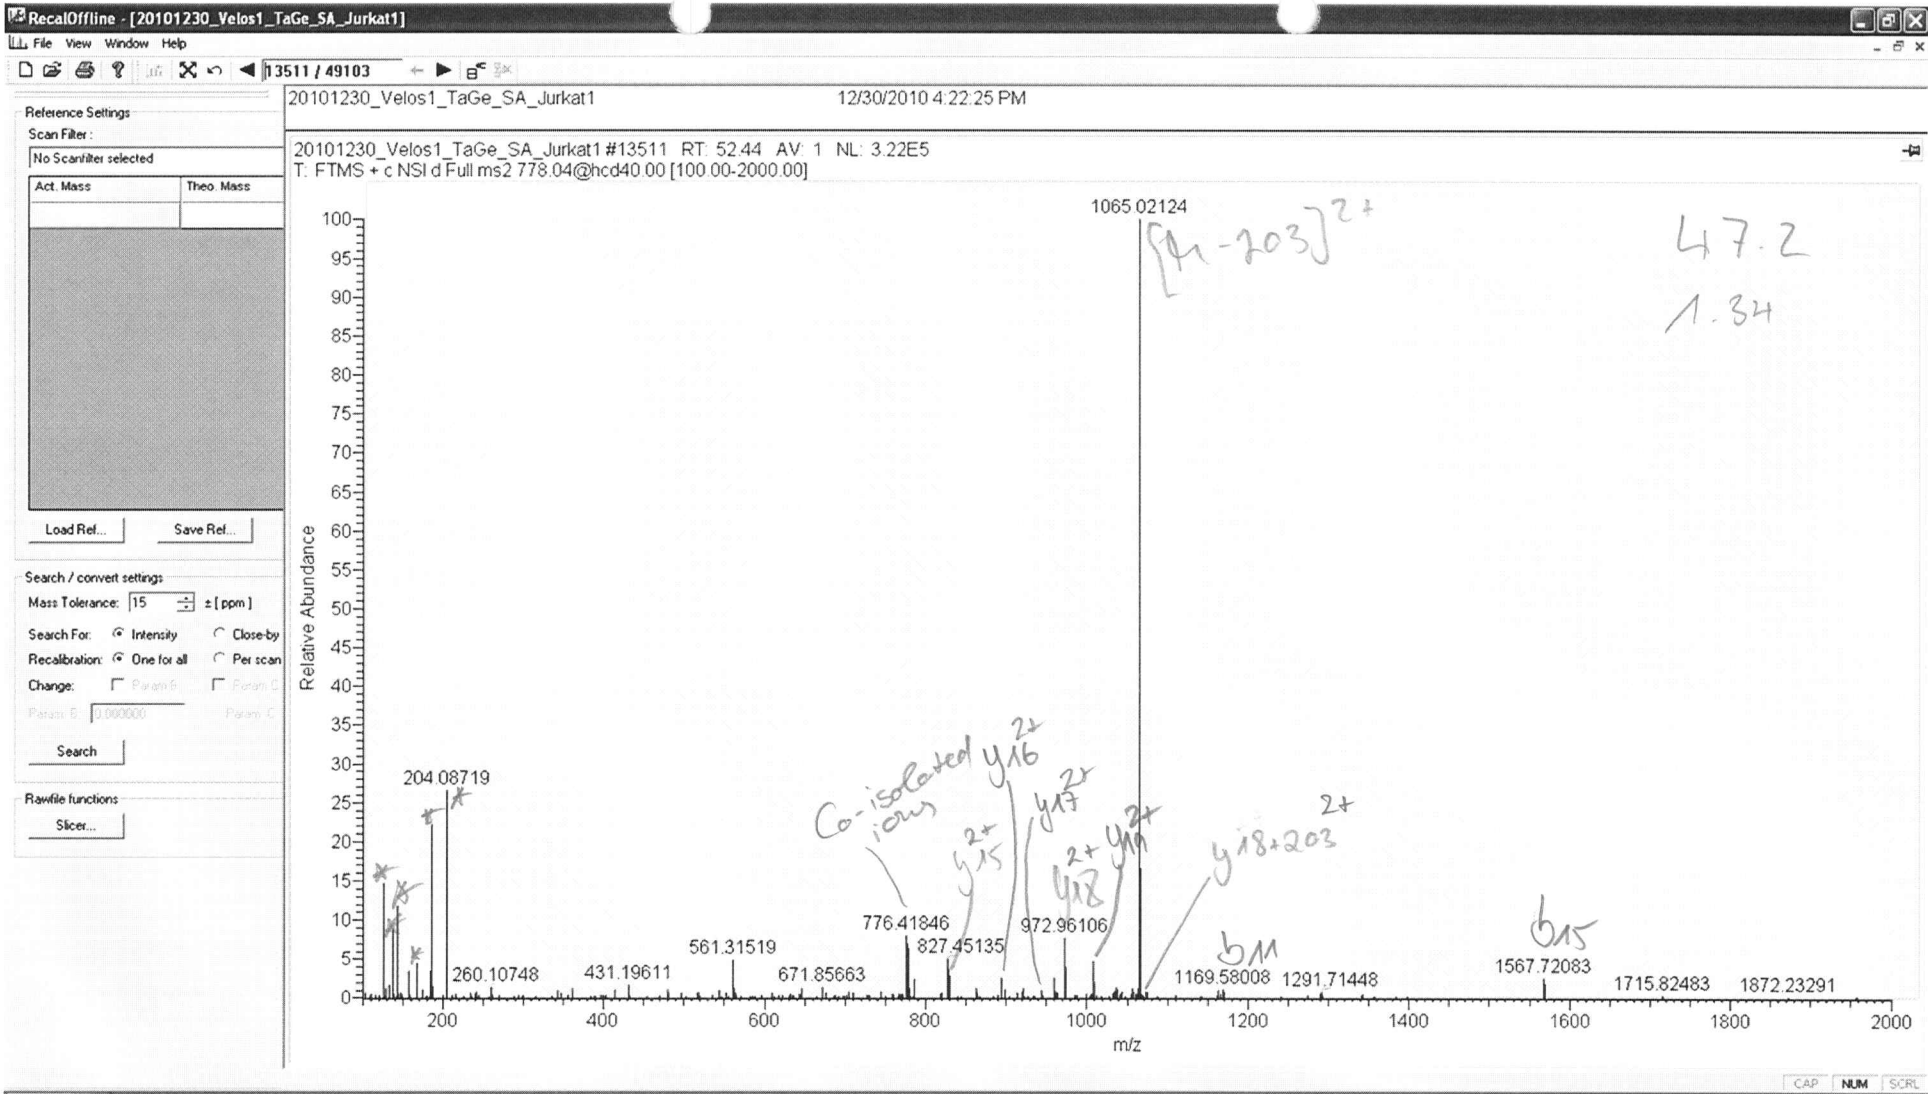

y<sub>17</sub>  
y<sub>15</sub>  
LAGTEsPVREEPGEDFPAAR

No site evidence

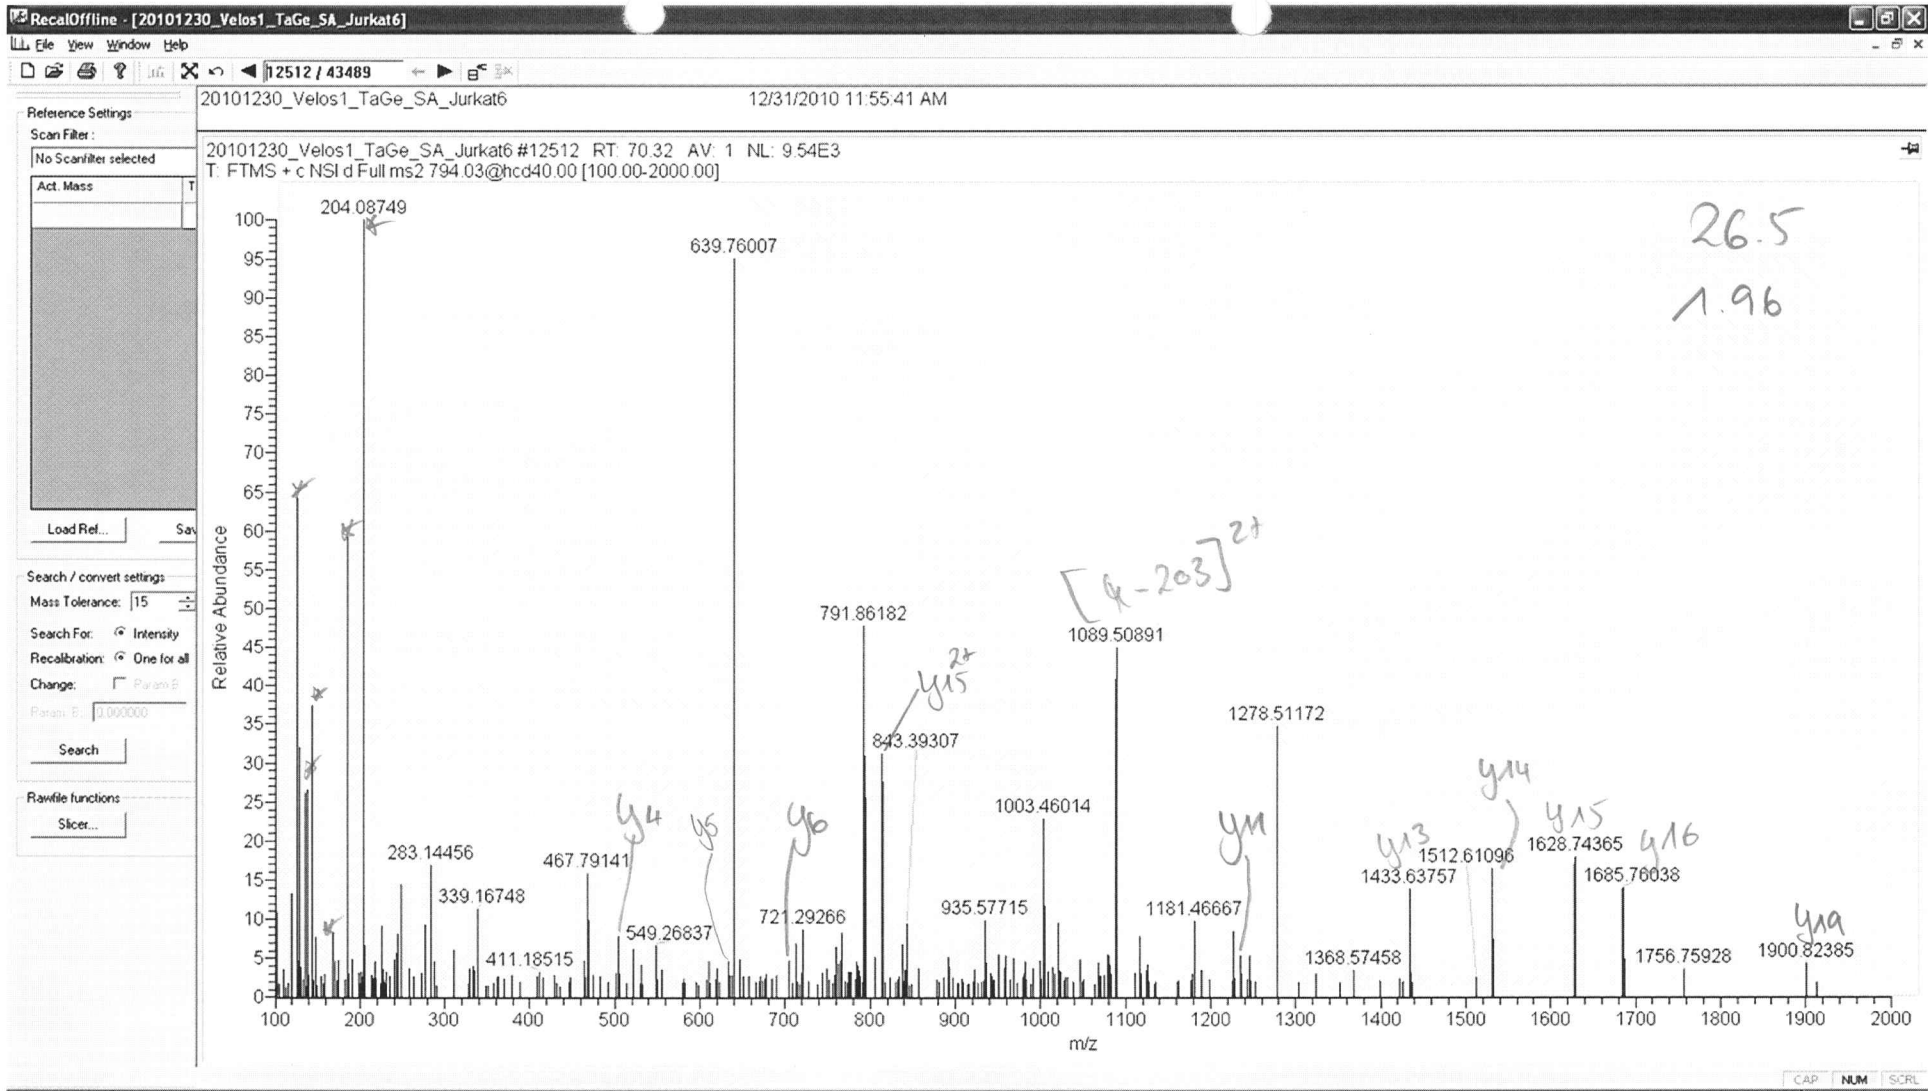

LYGsAGPPPTGEEDTAEKDEL

no site evidence

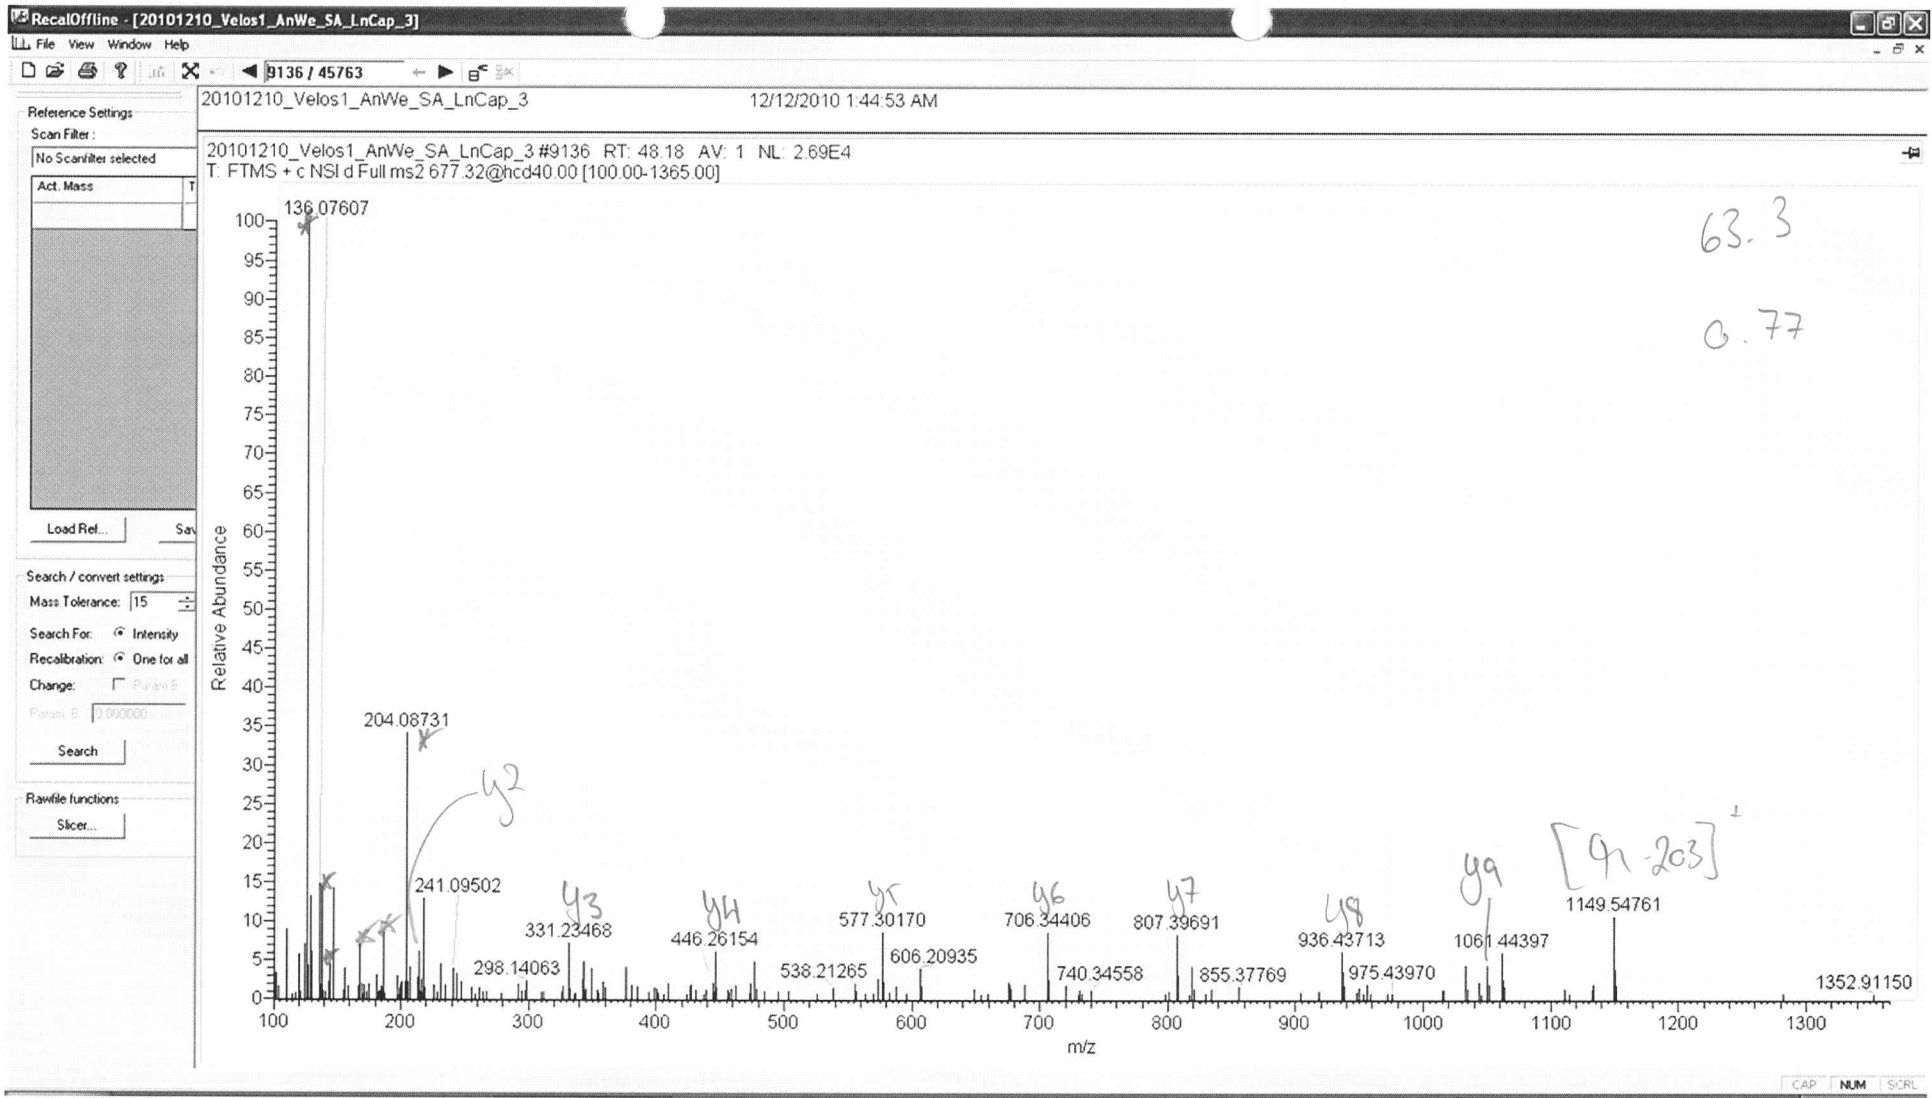

VNEtEMDIAK

no site  
evidence

67

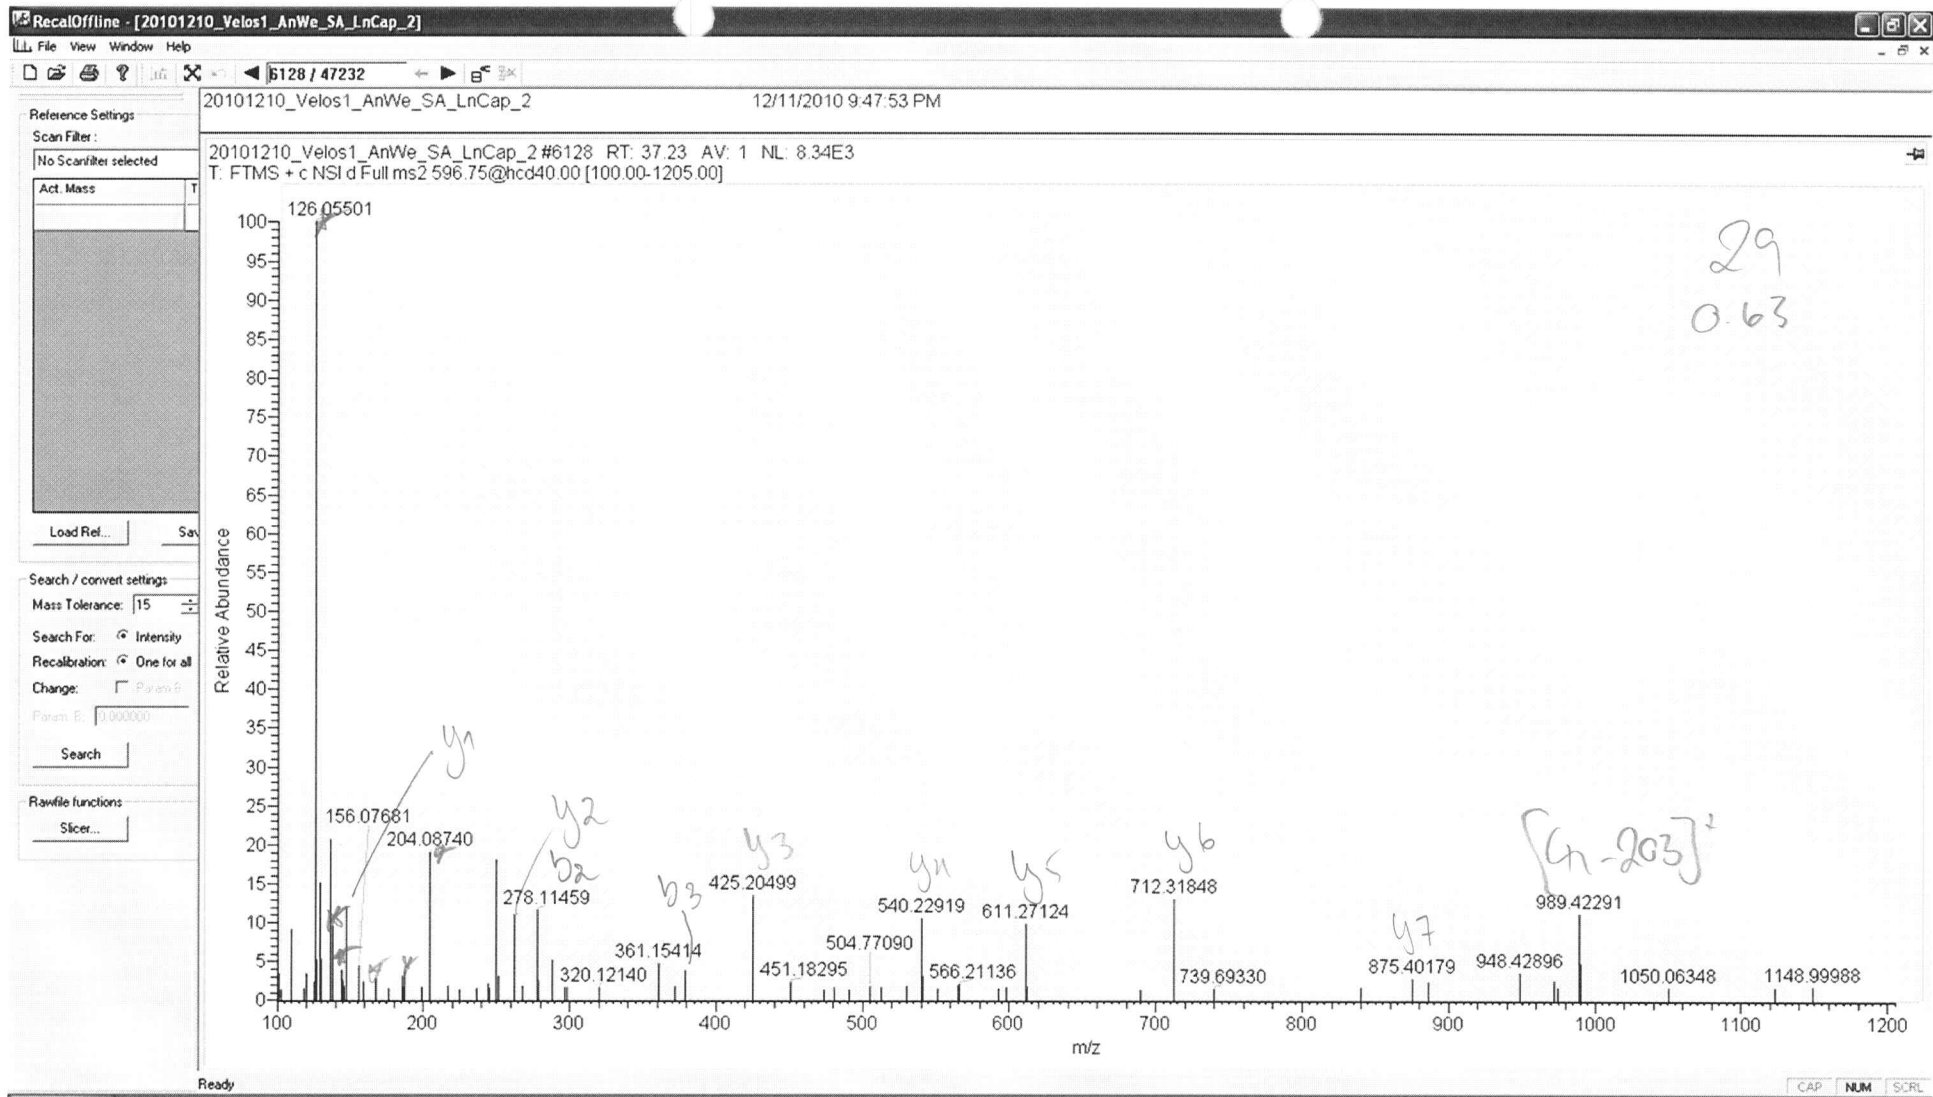

NYtADYDK

no site evidence

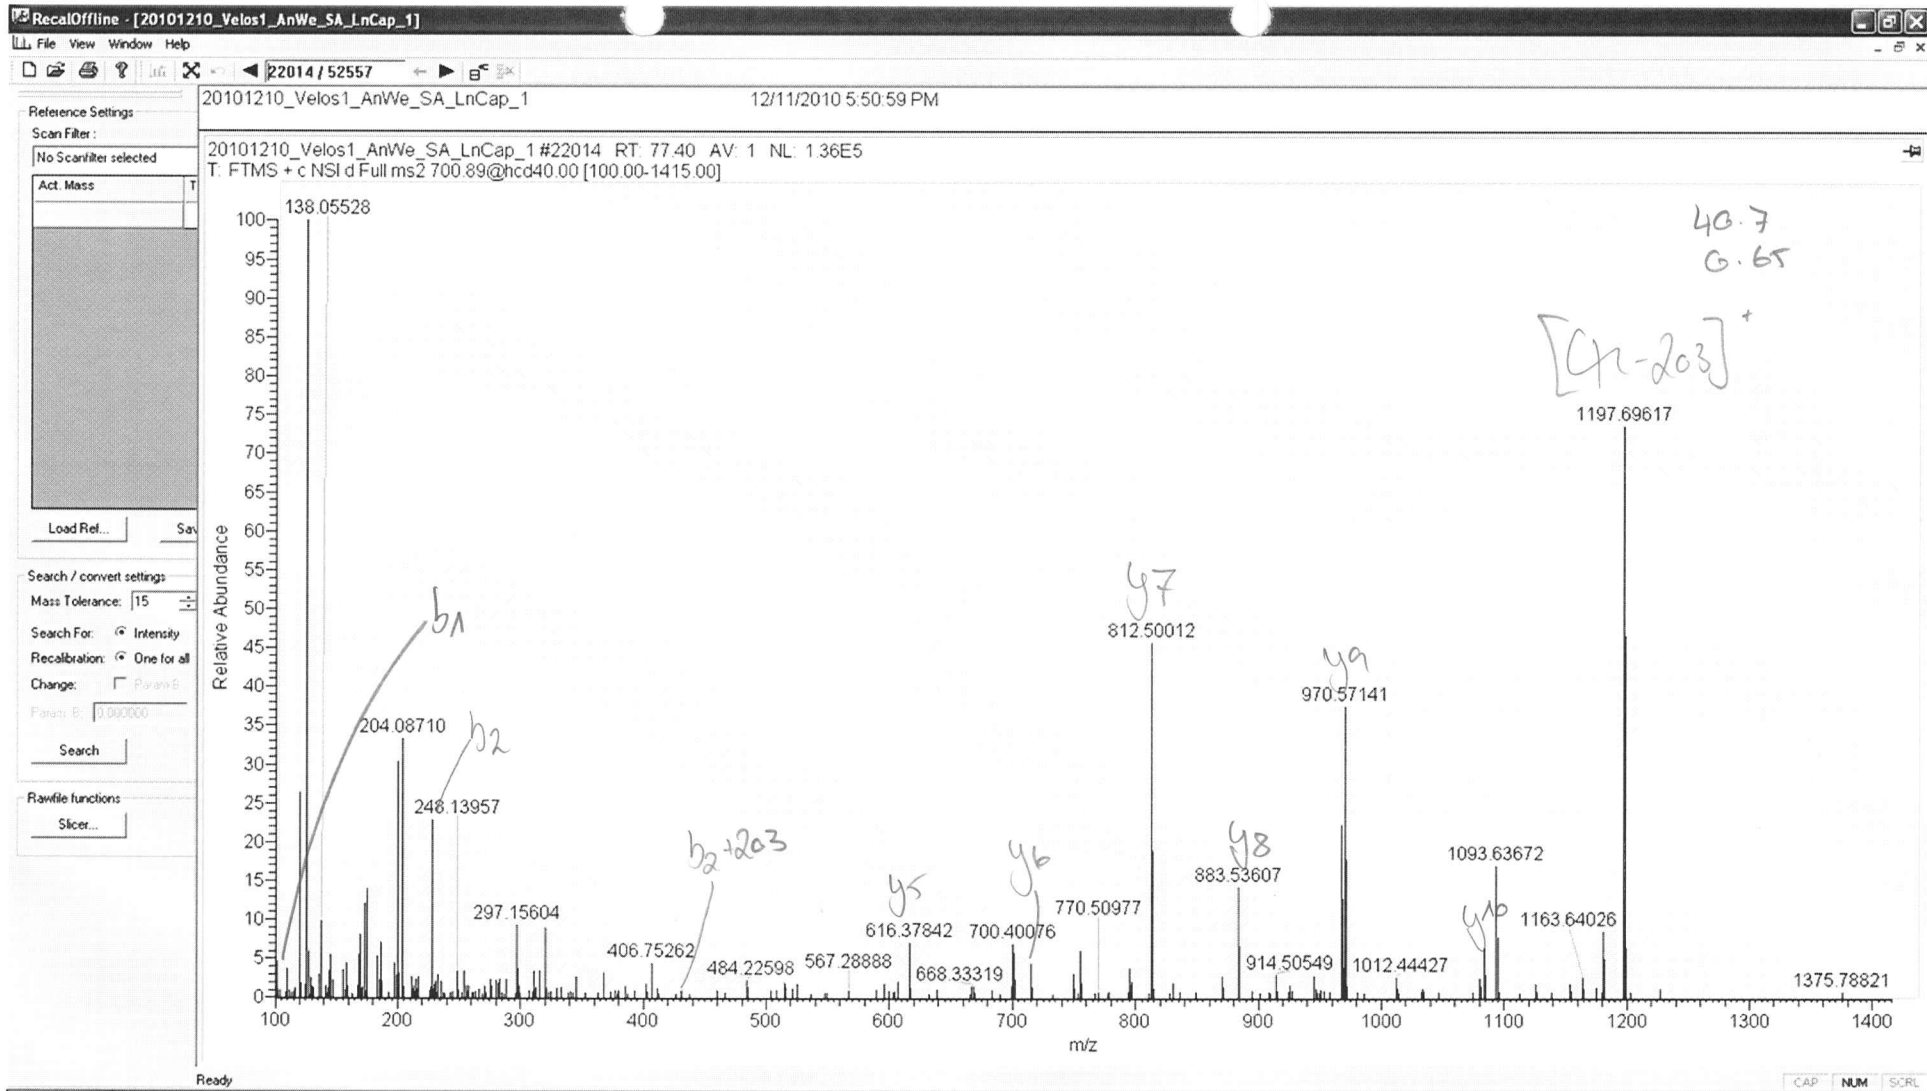

NLSAPVTLnLR

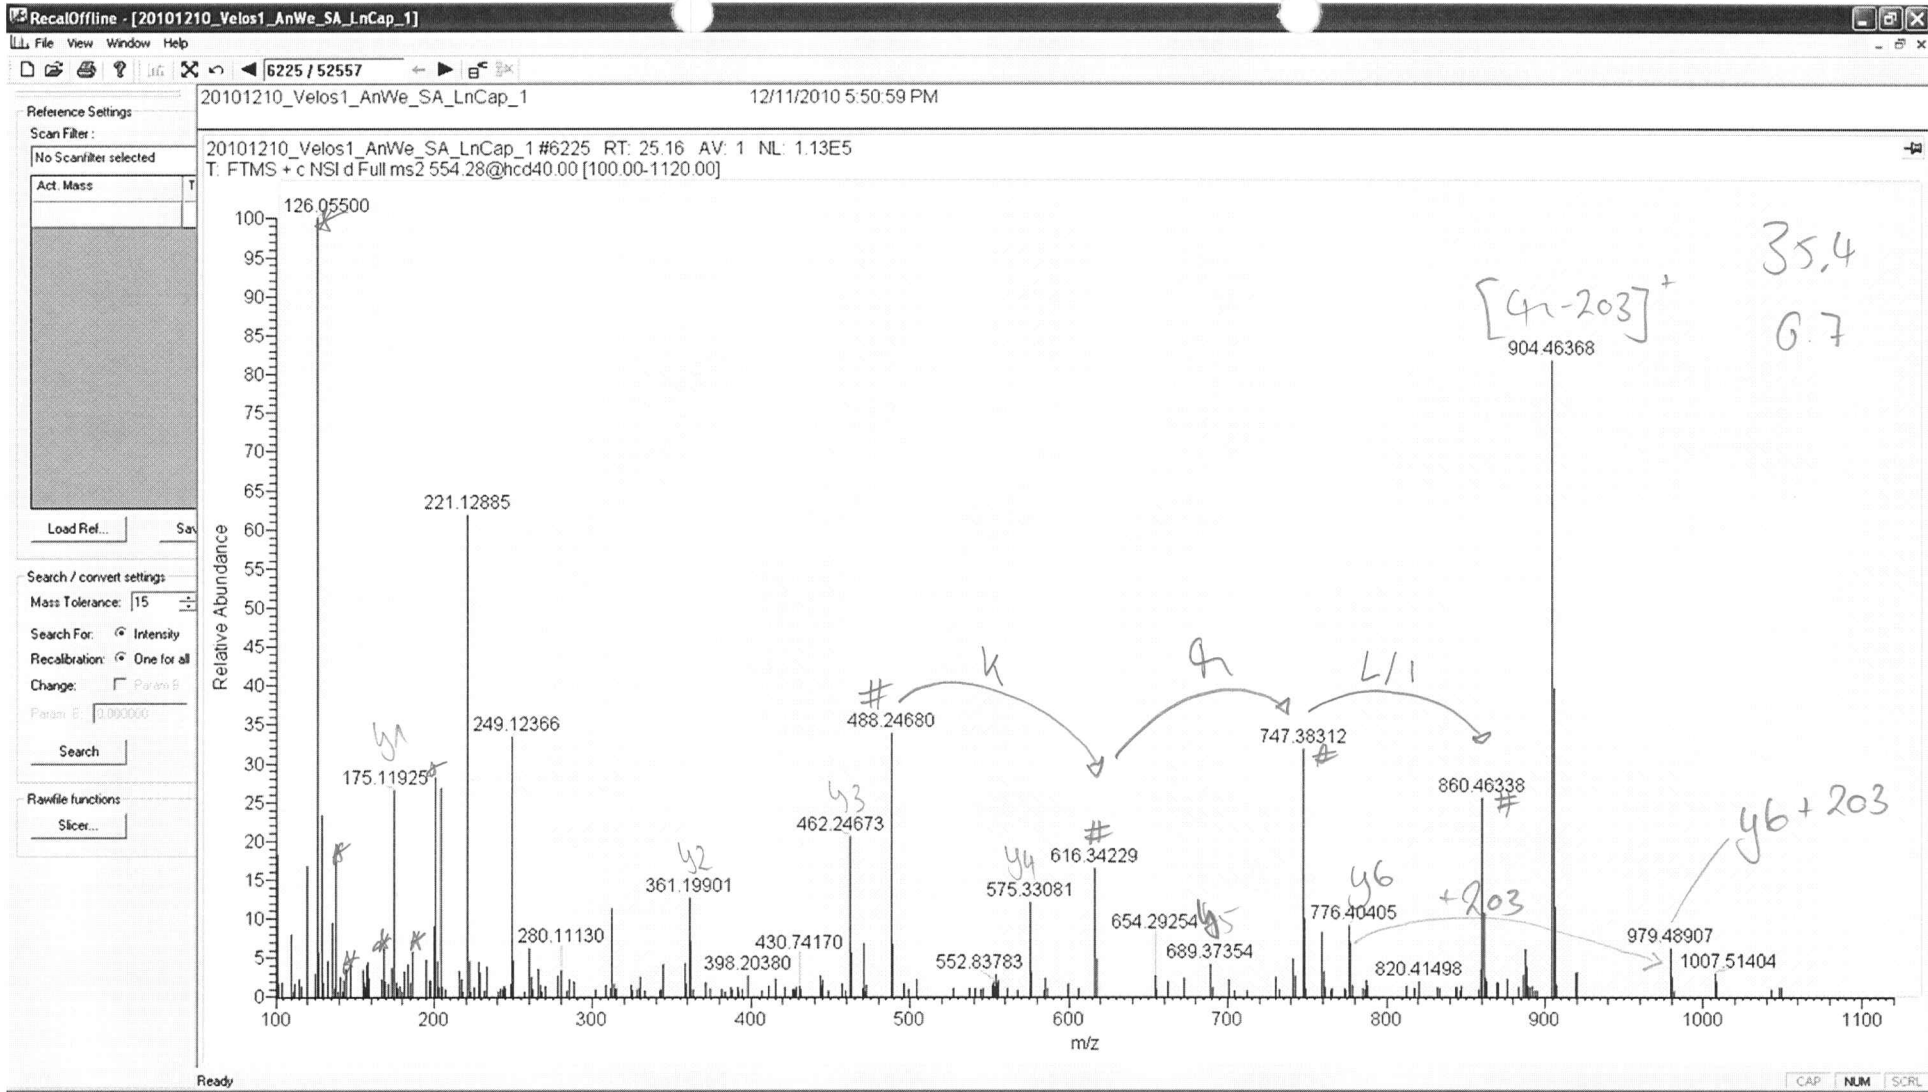

GASNLtWR

S3

# chimeric spectrum;  
ion series from co-isolated  
precursor

70

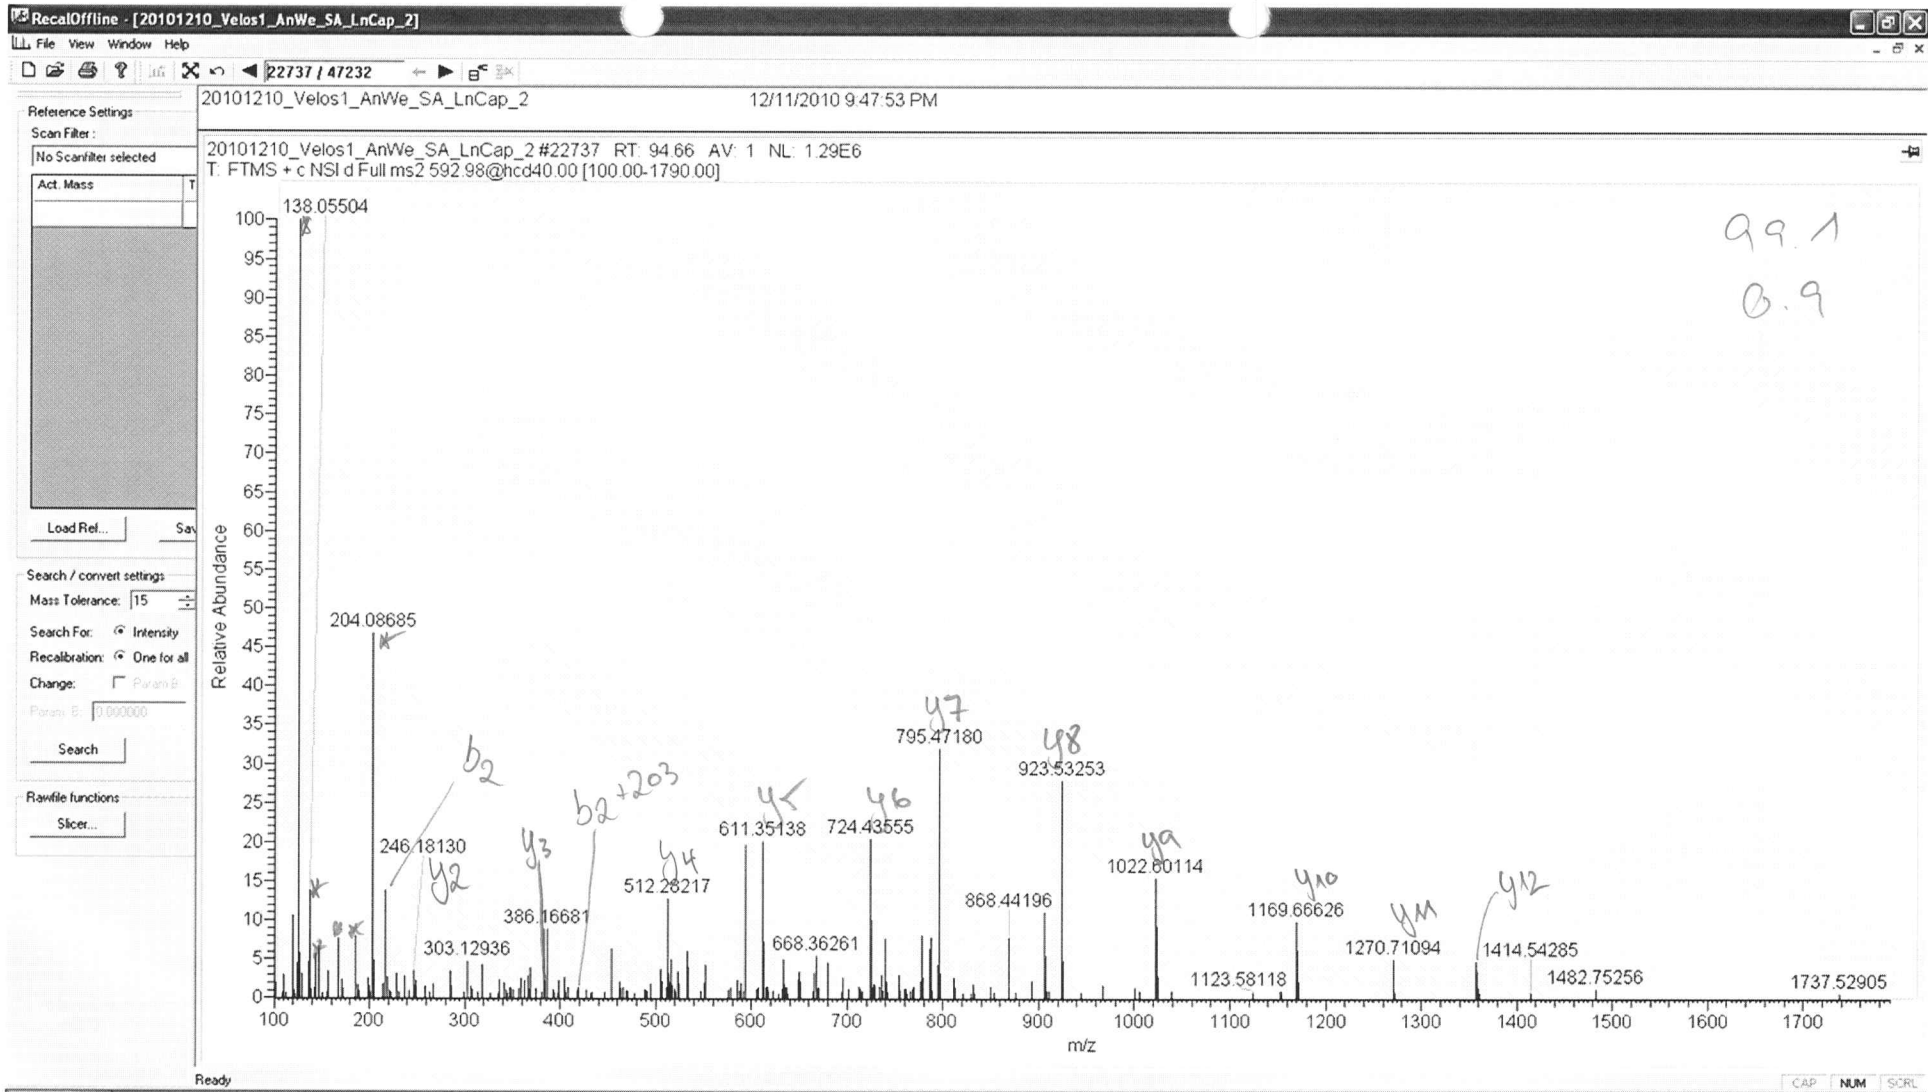

TNStFVQALVEHVK

N2

b2

F1



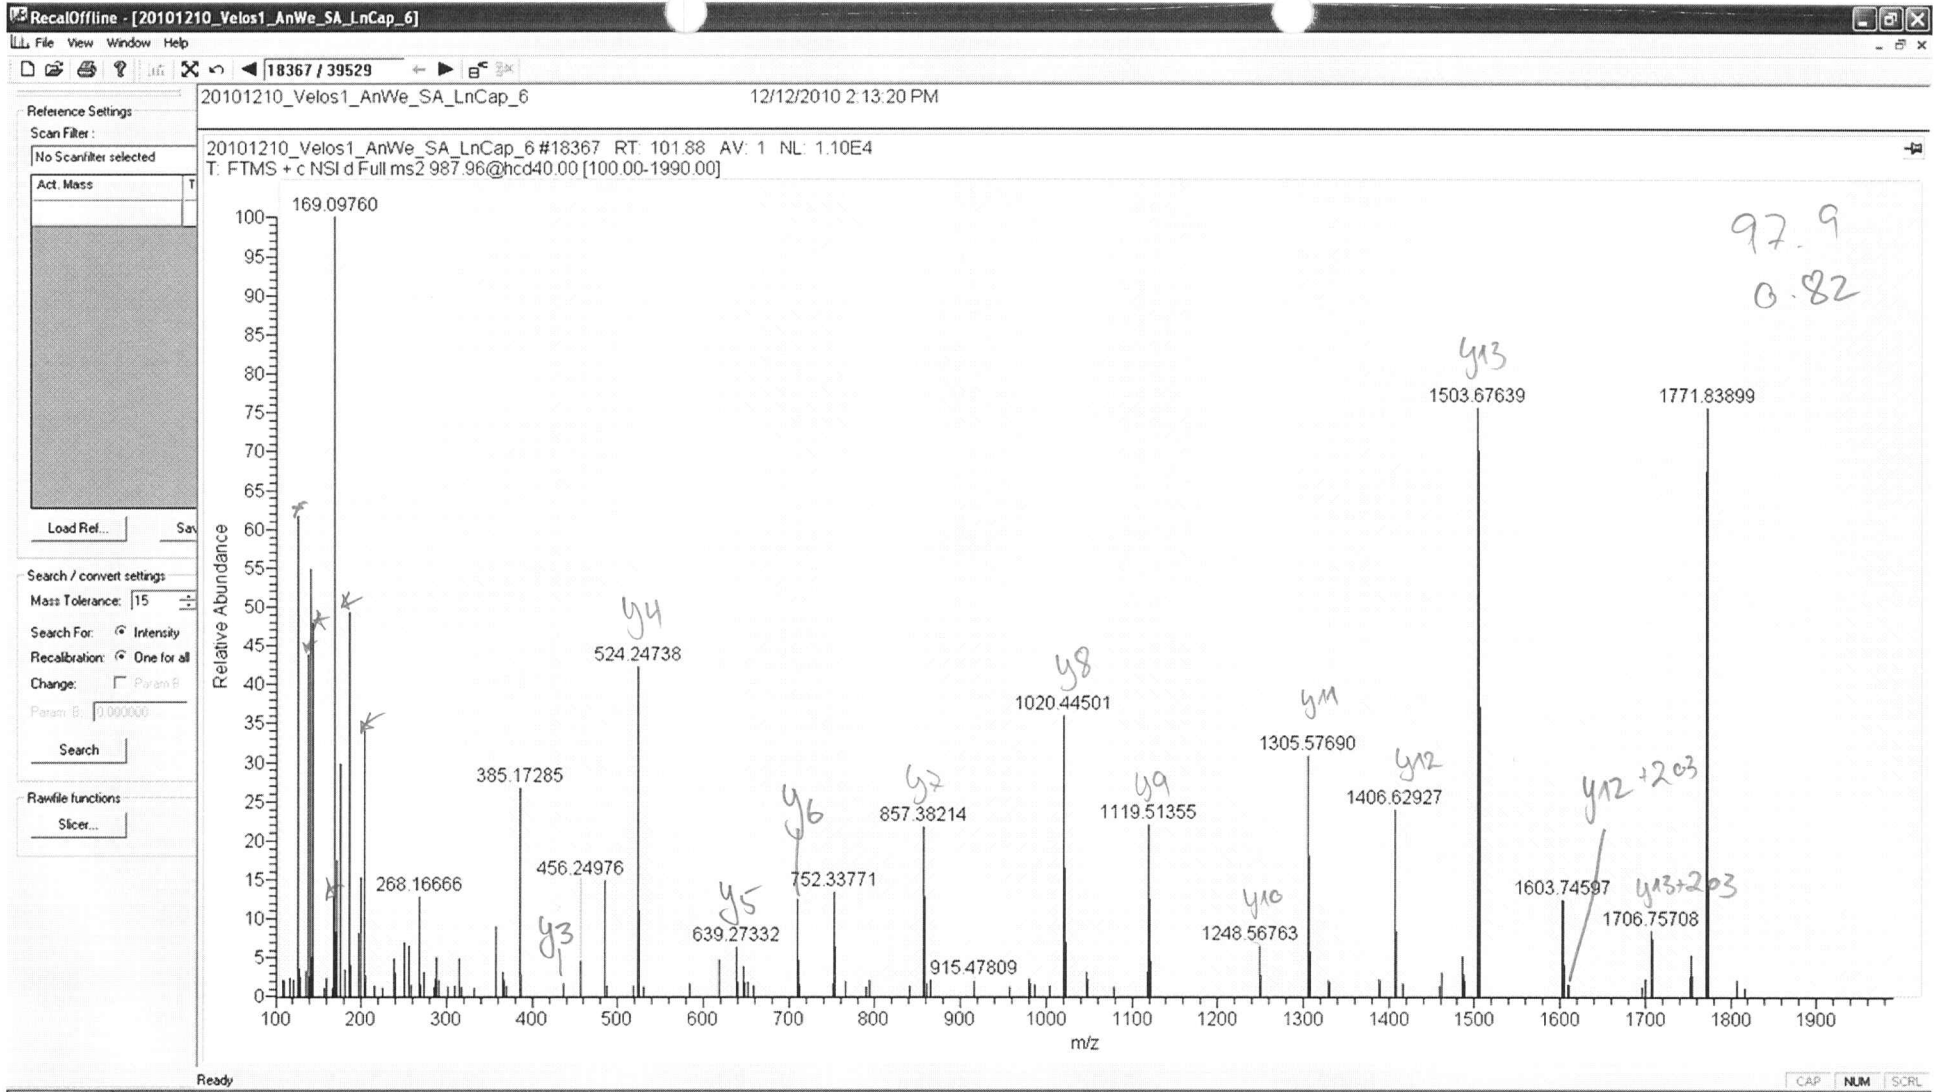

APVPTGEVYFADsFDR

y13 y12

T5

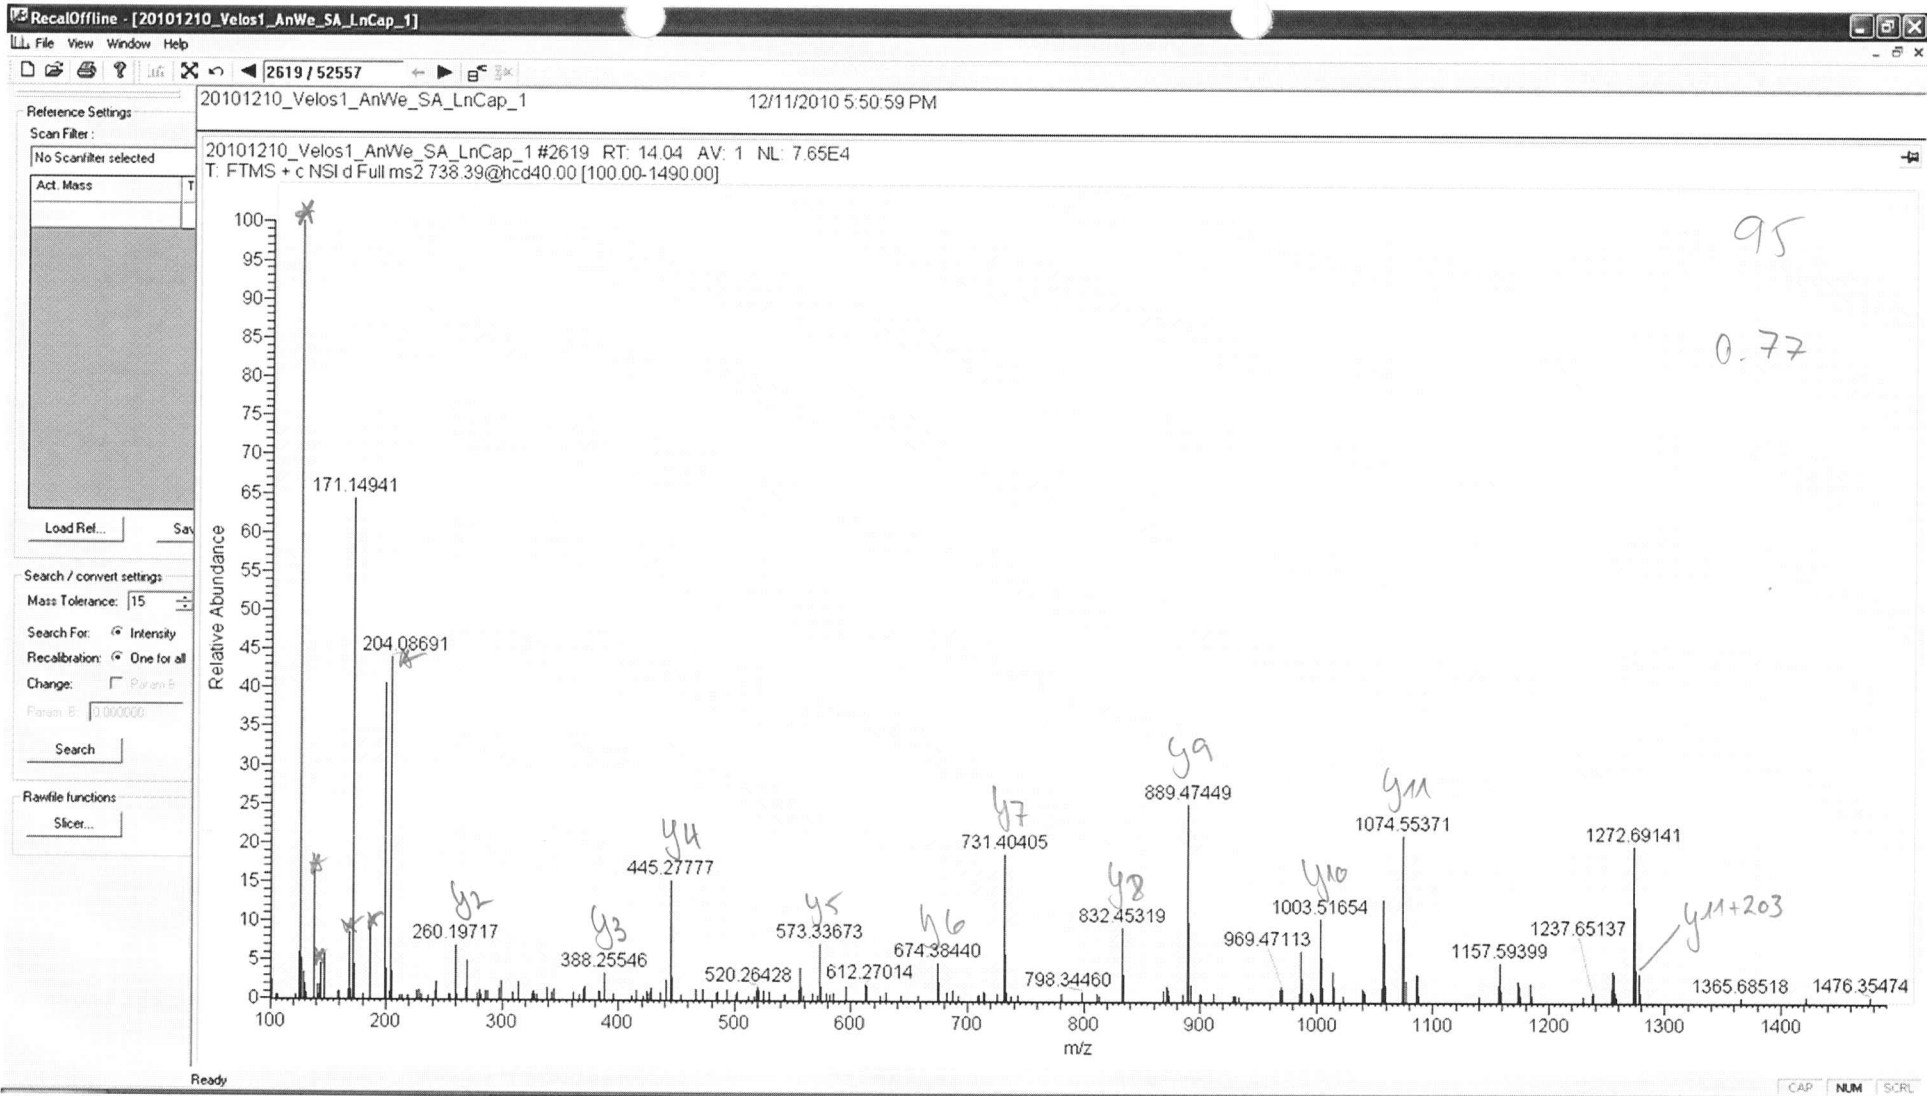

VVANGTGTQGQLK

no site evidence

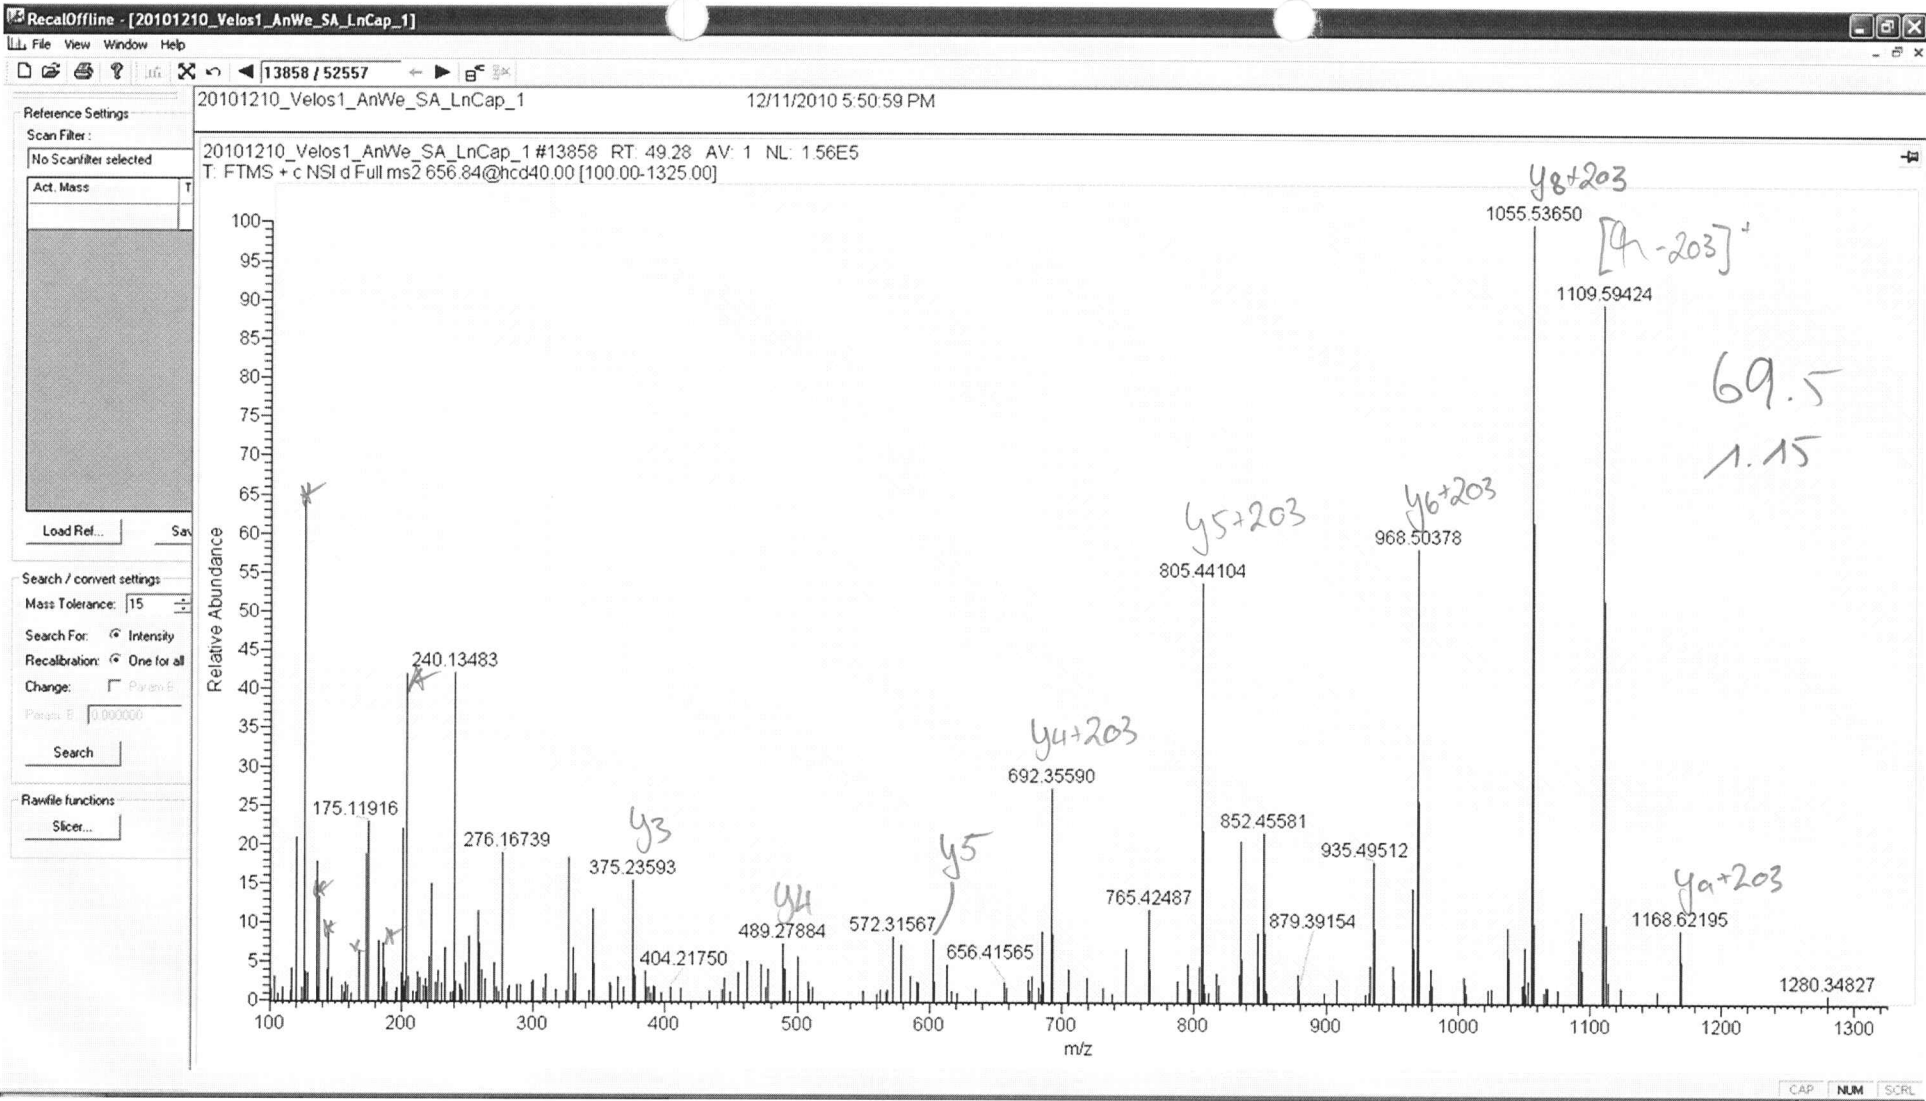

$y_5$   
 $y_4$   $y_3$   
GSLSYLnVTR

N7

74

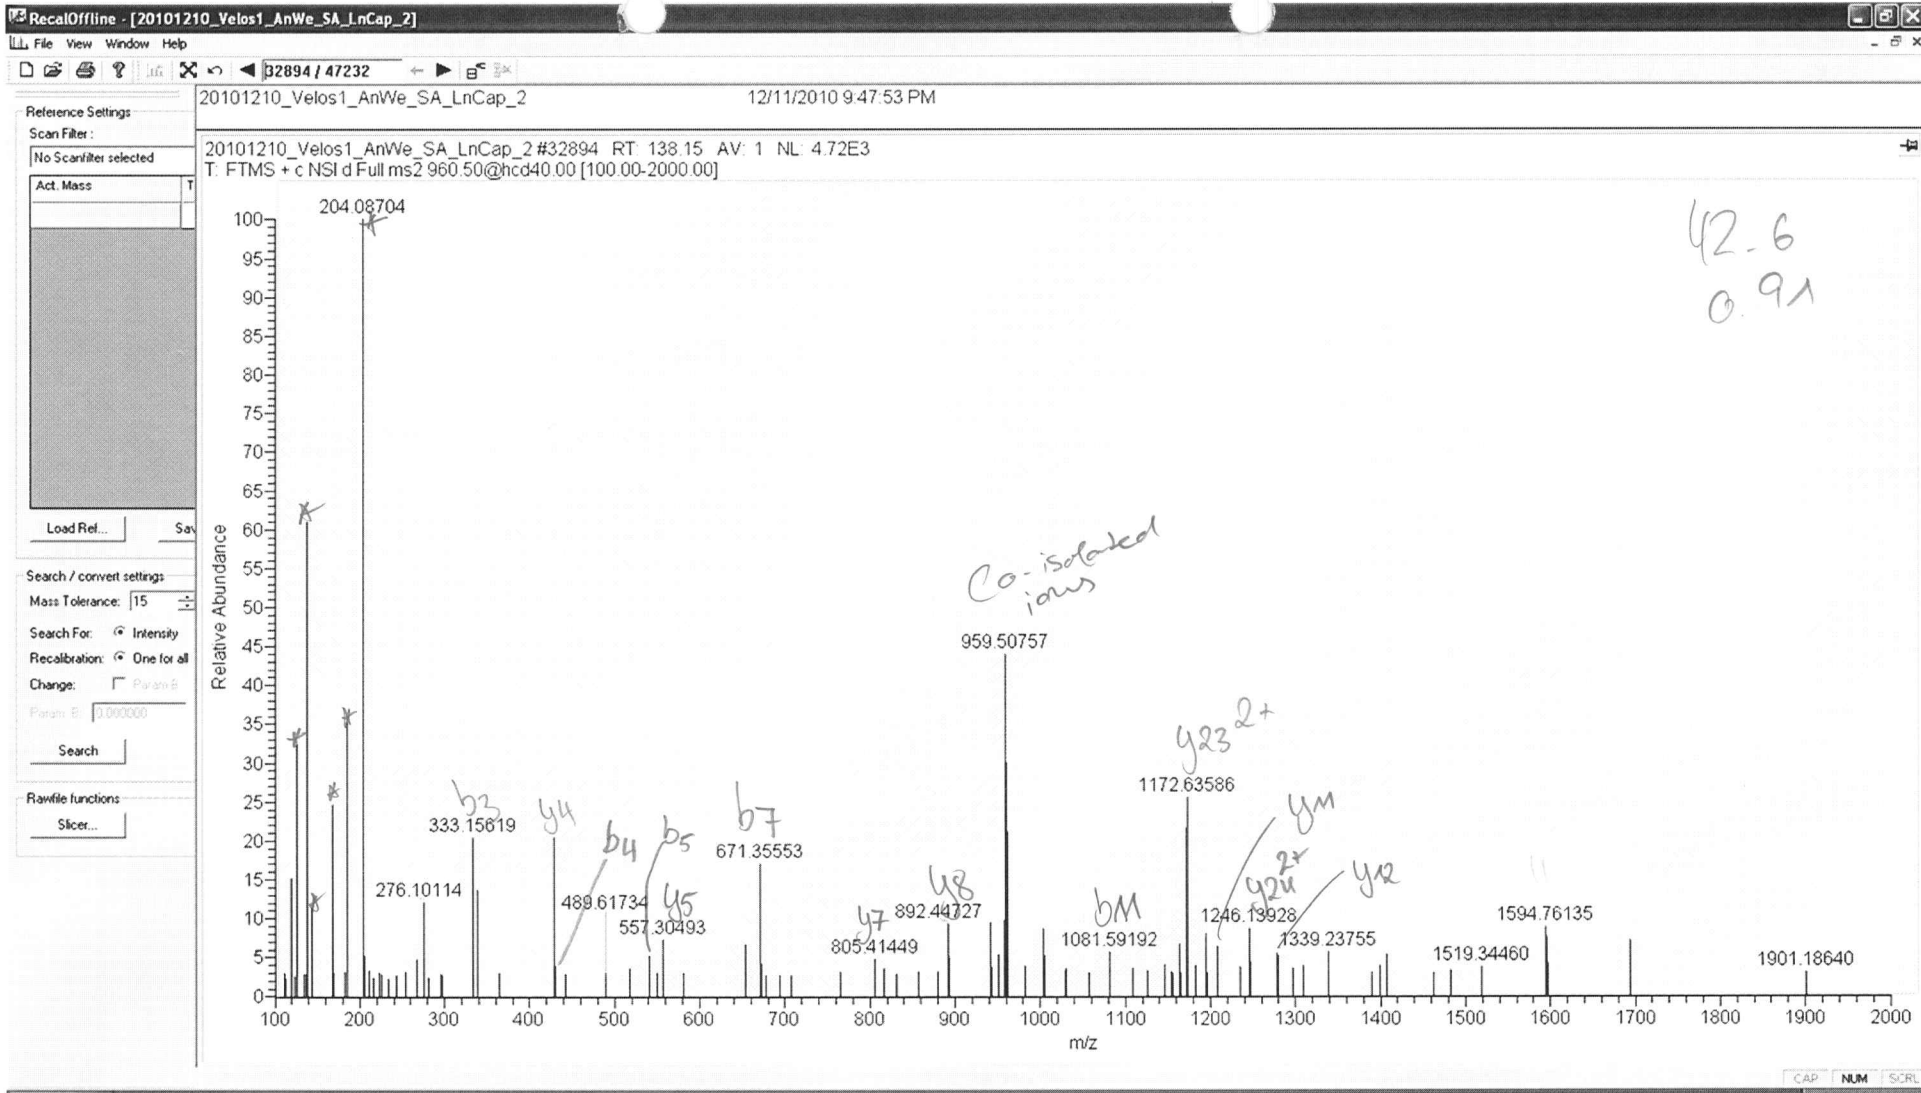

<sup>y23</sup>  
NAFPLGAPTLVTSQATTLSTFQPANK

no site evidence

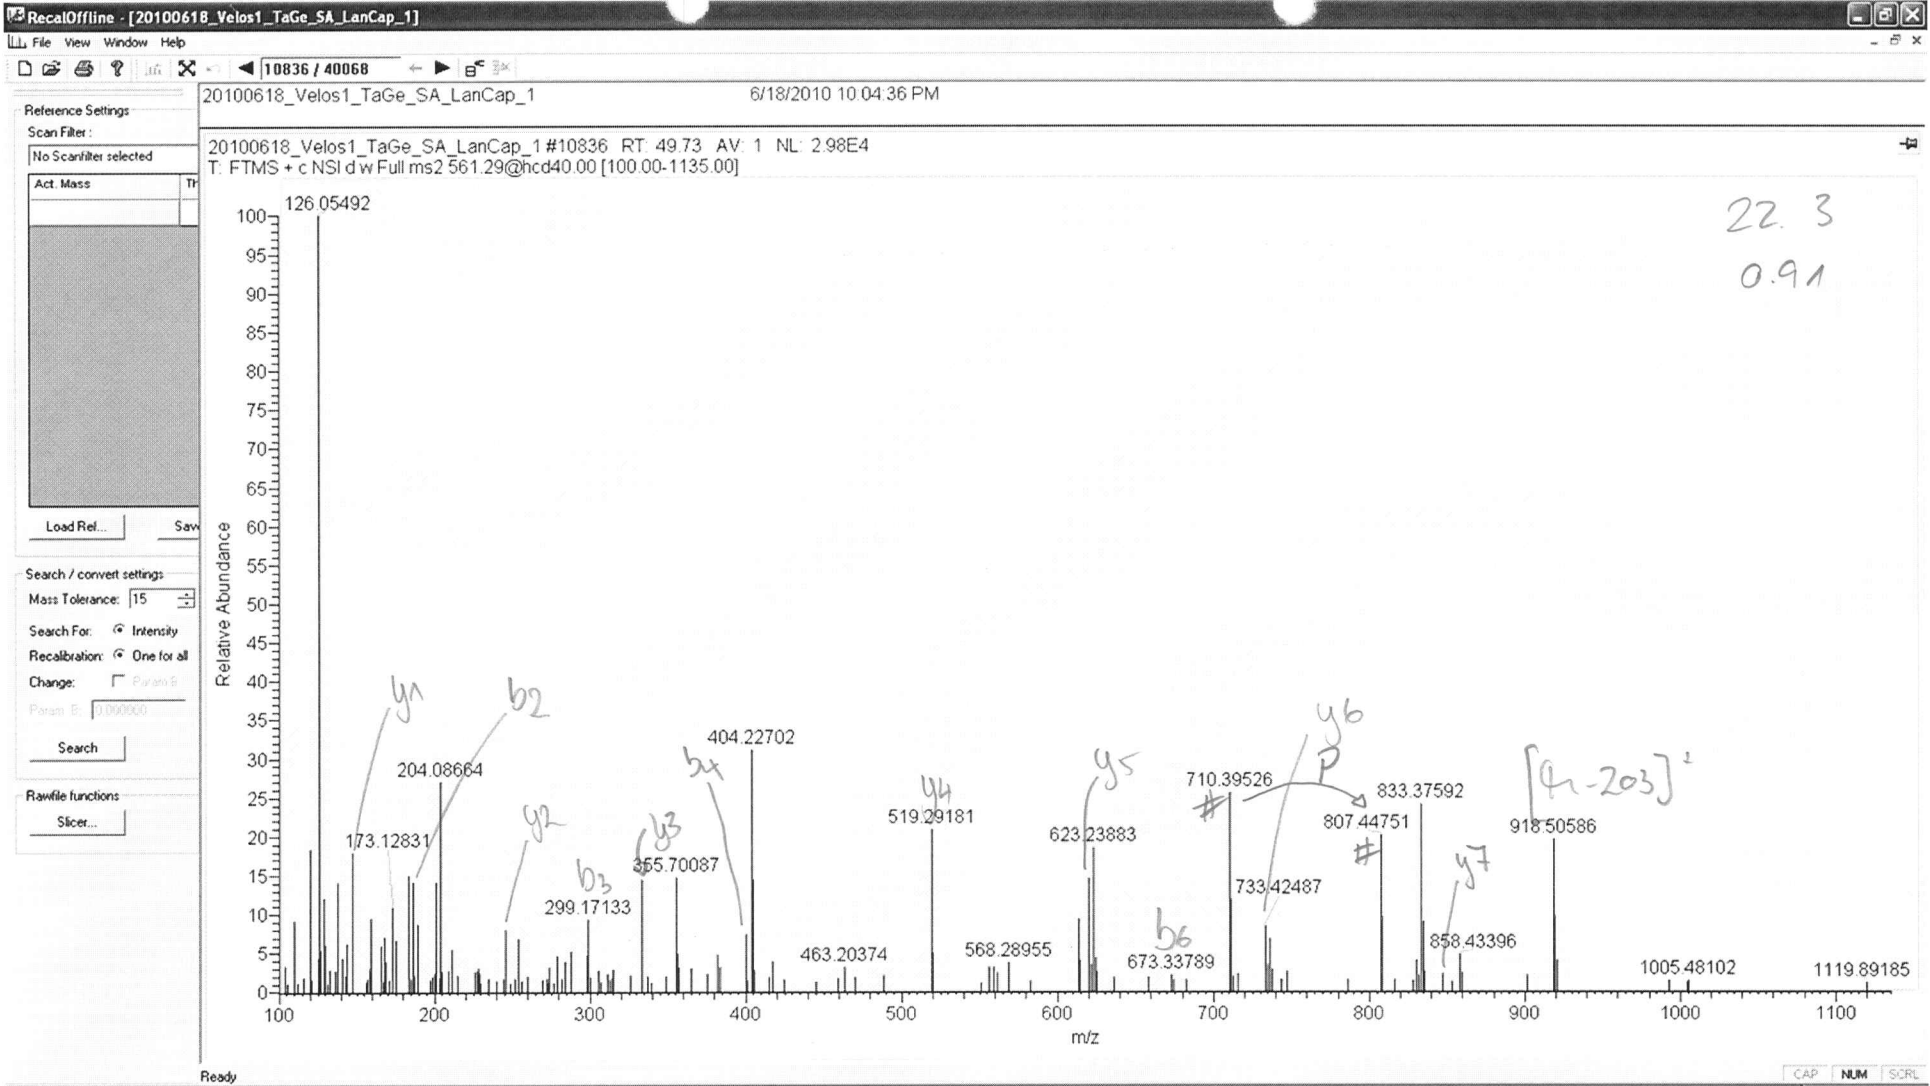

ANLTW<sup>y4</sup>sVK

no site evidence

# chromatic spectrum;  
peaks from 2nd ion  
series

76

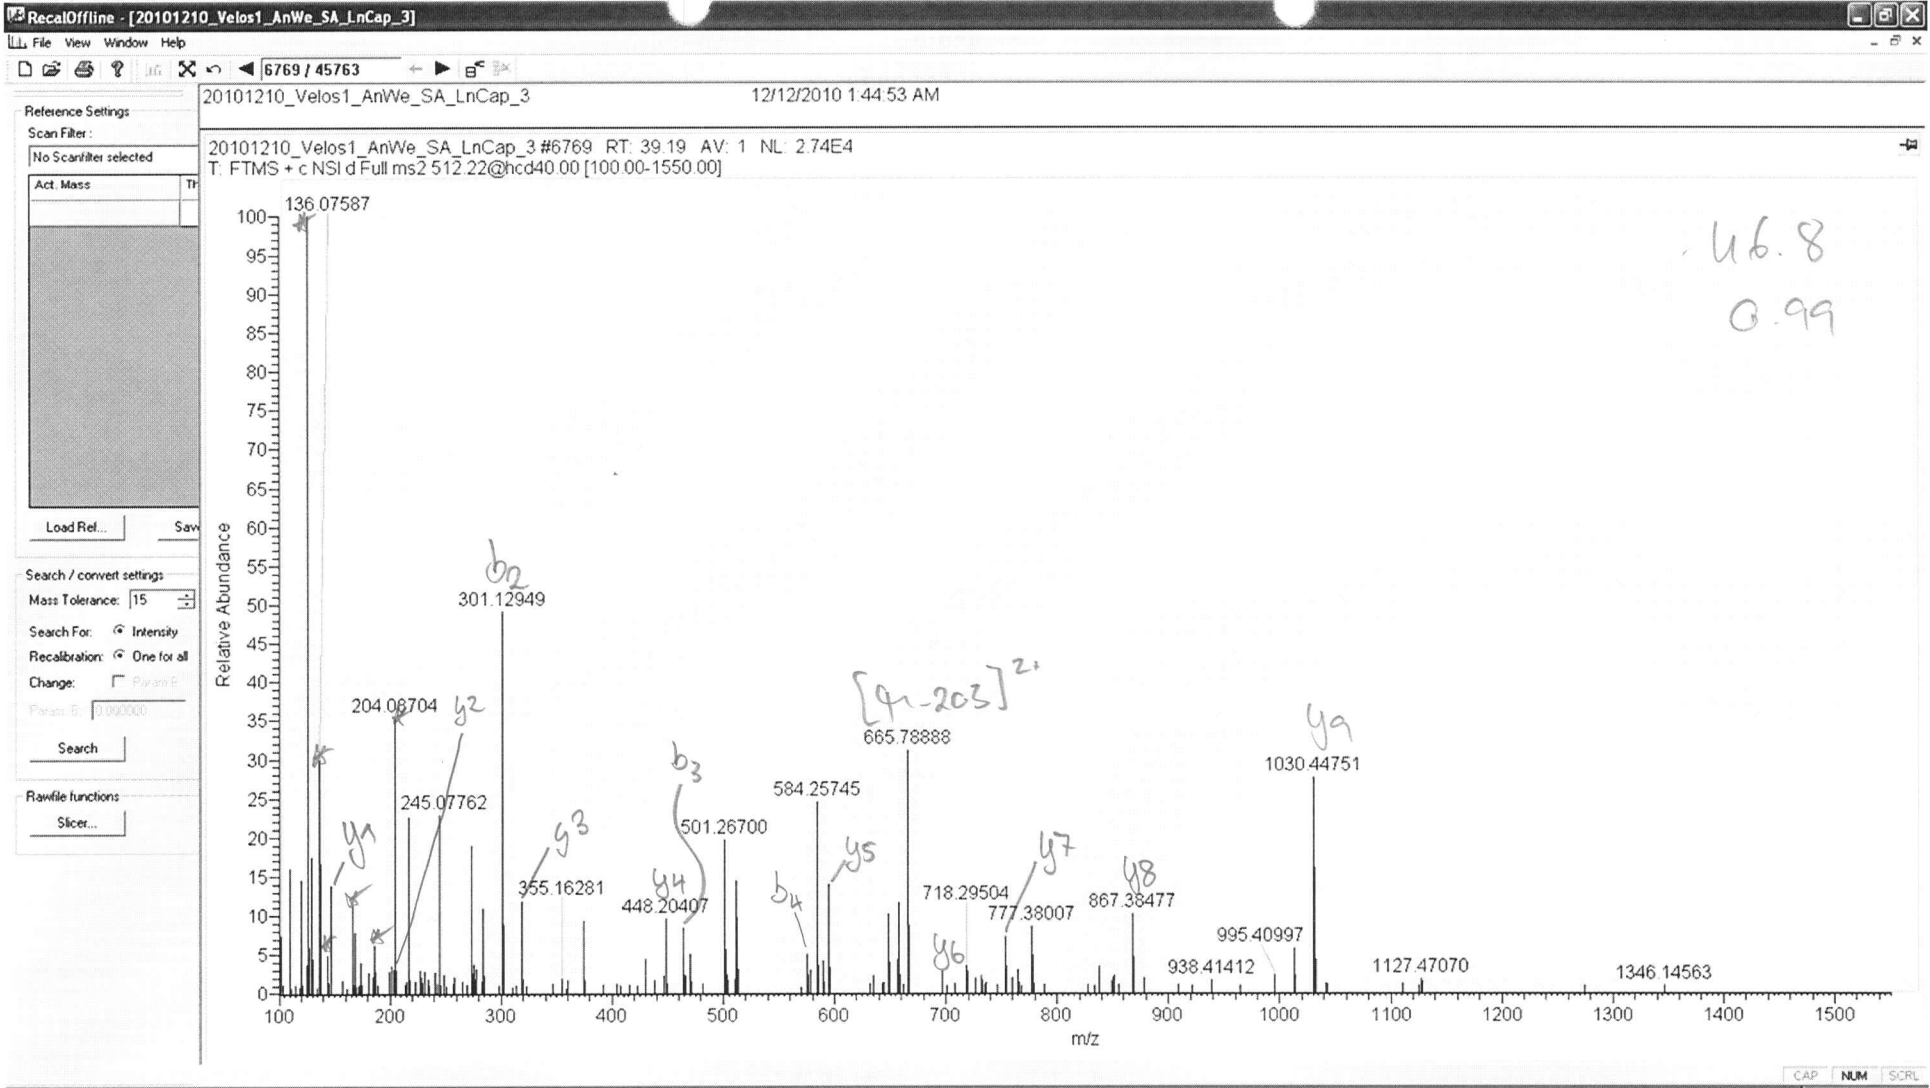

YHNGtFEDGK

no site evidence

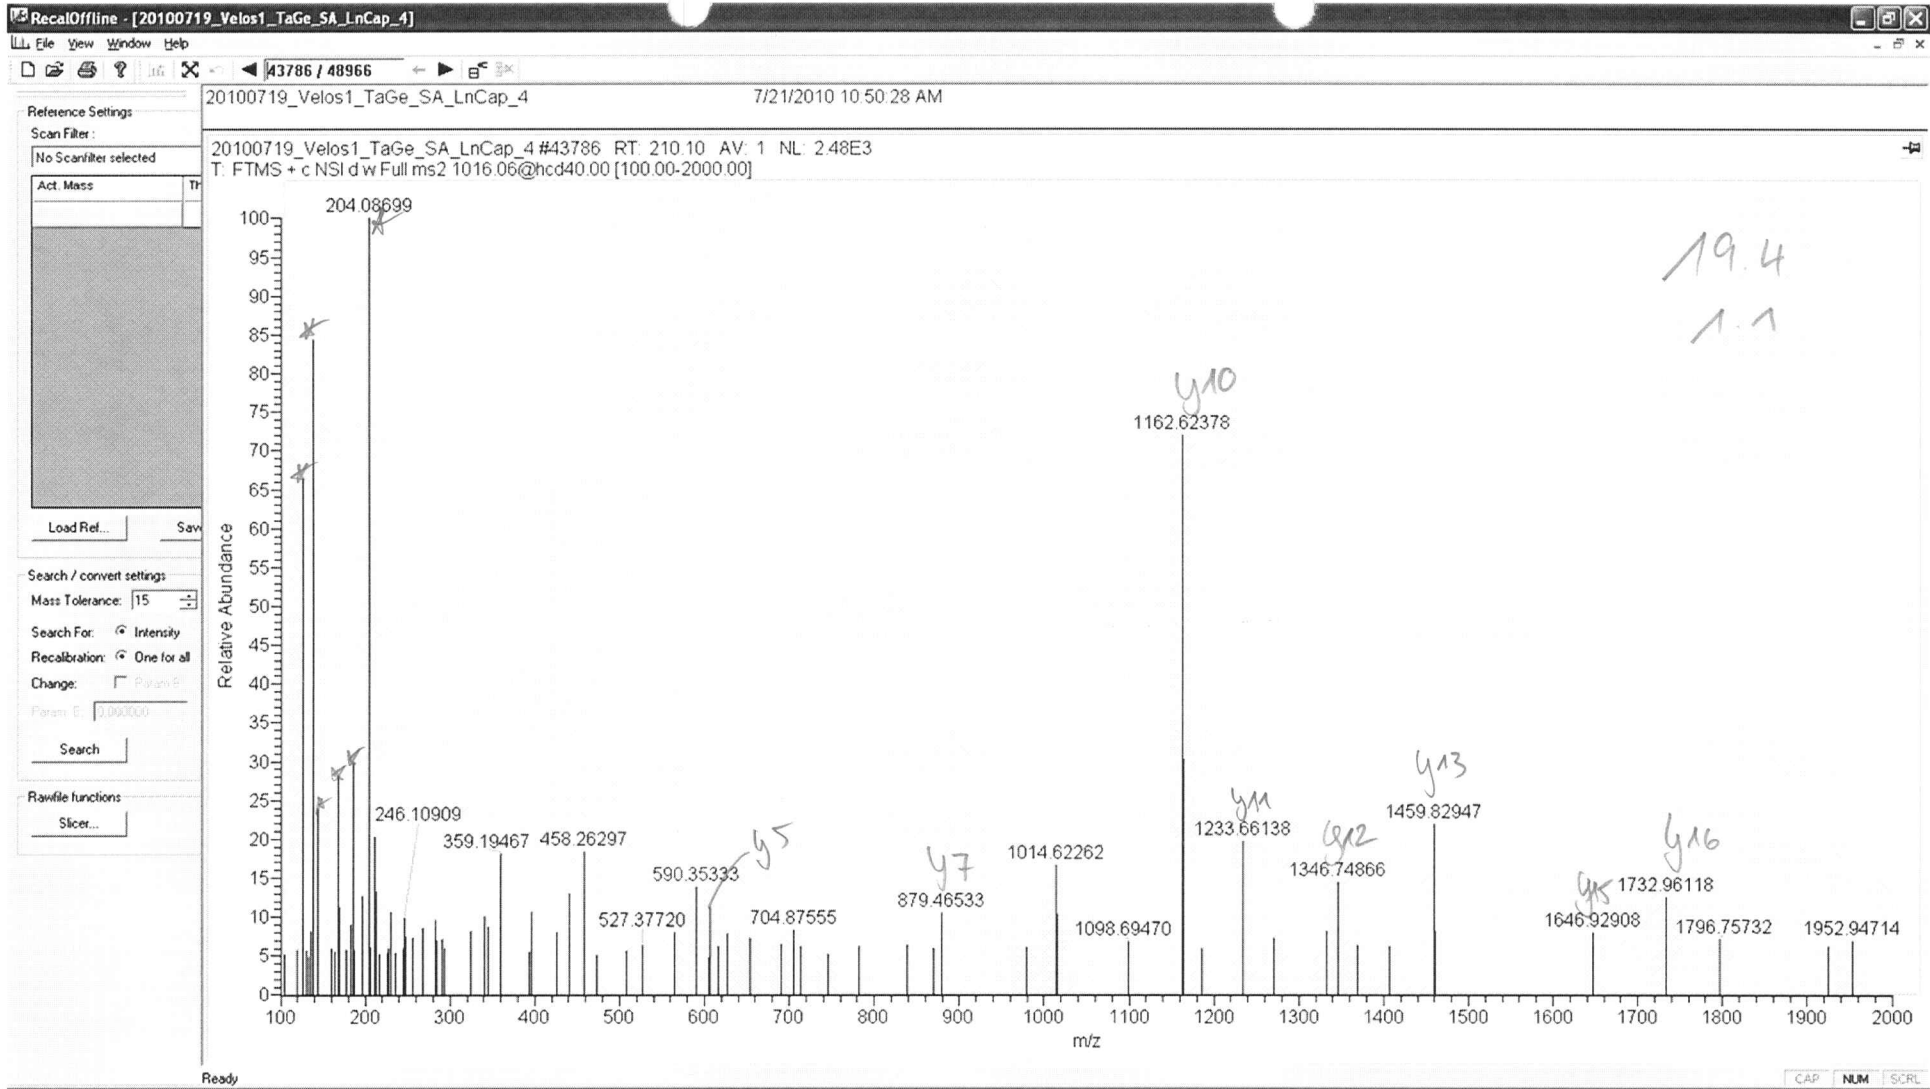

VLSSAIPVAGAPLVTATTTAVSSVLLAPSVFQQtVtR

<sup>y13</sup>  
<sup>y10</sup>  
<sup>y7</sup> <sup>y5</sup>

no site evidence

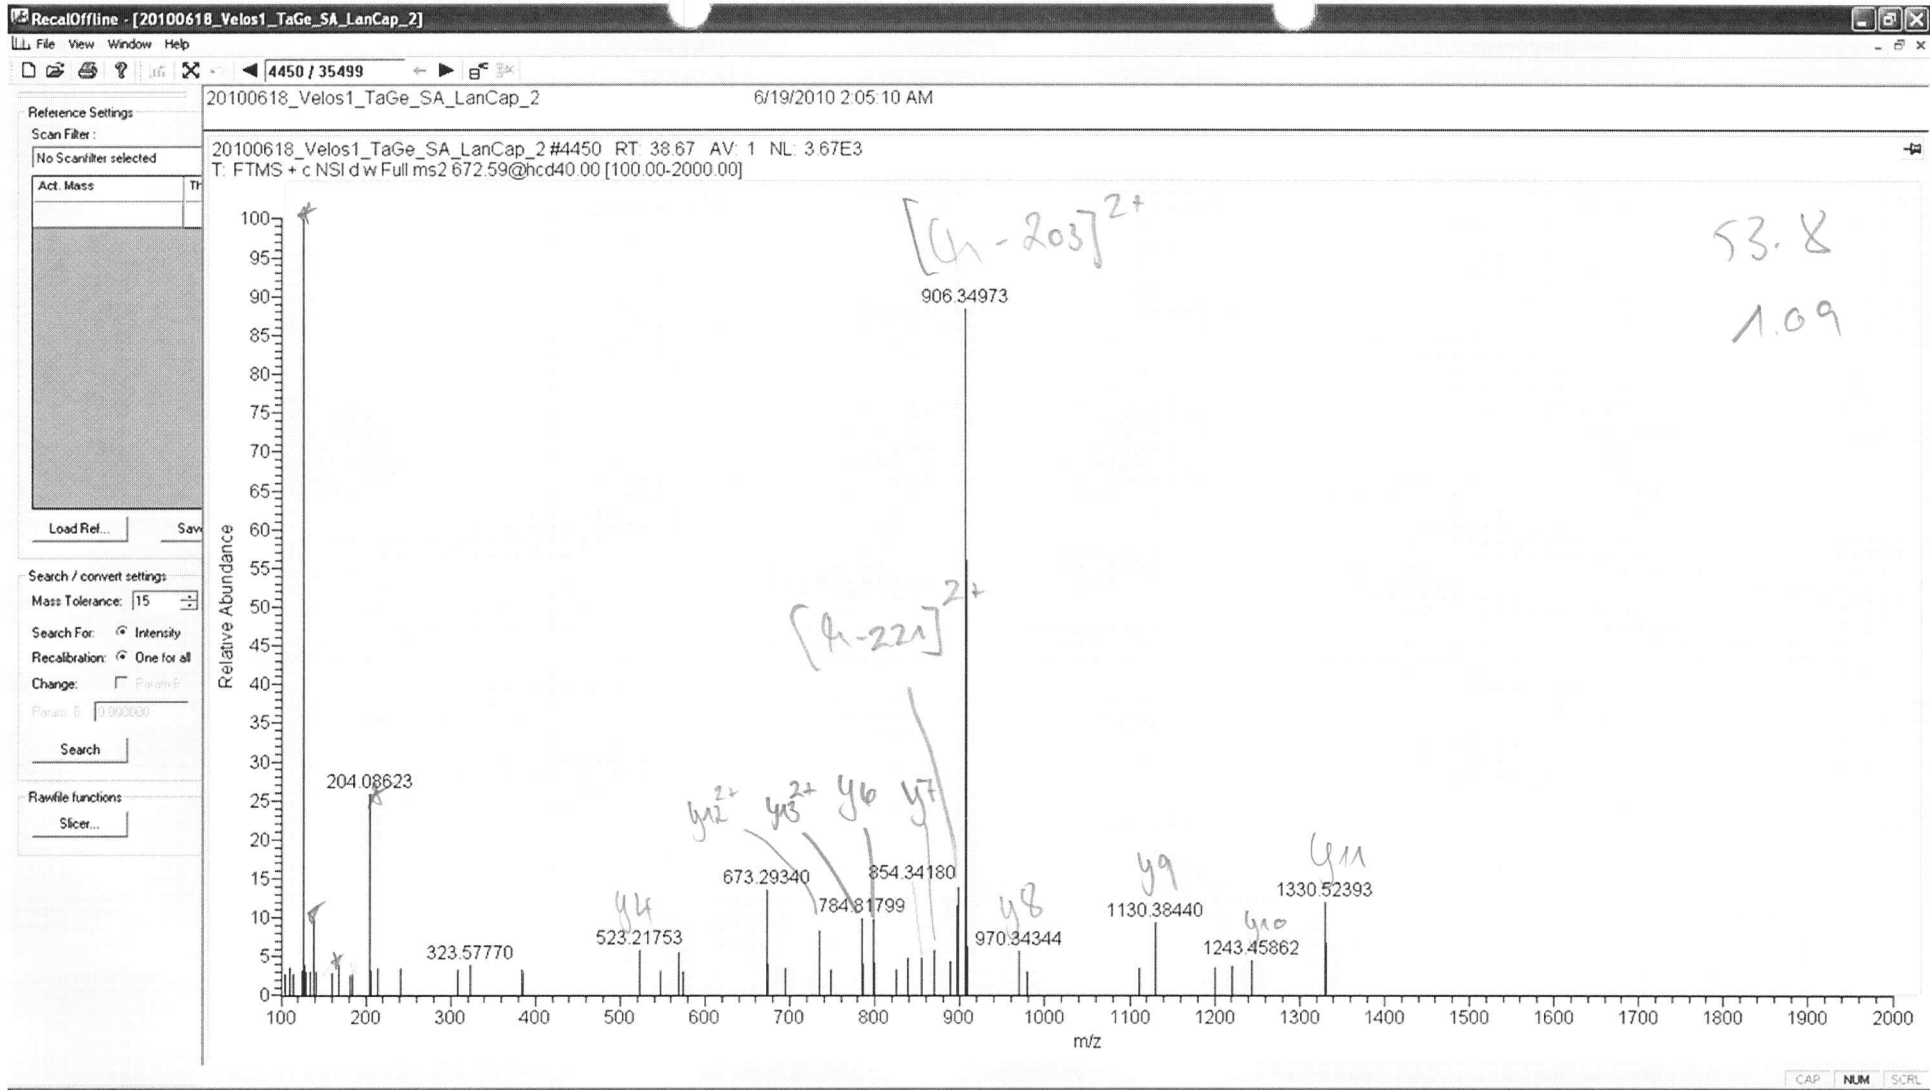

no site evidence

NETHSIcTAcDEsck



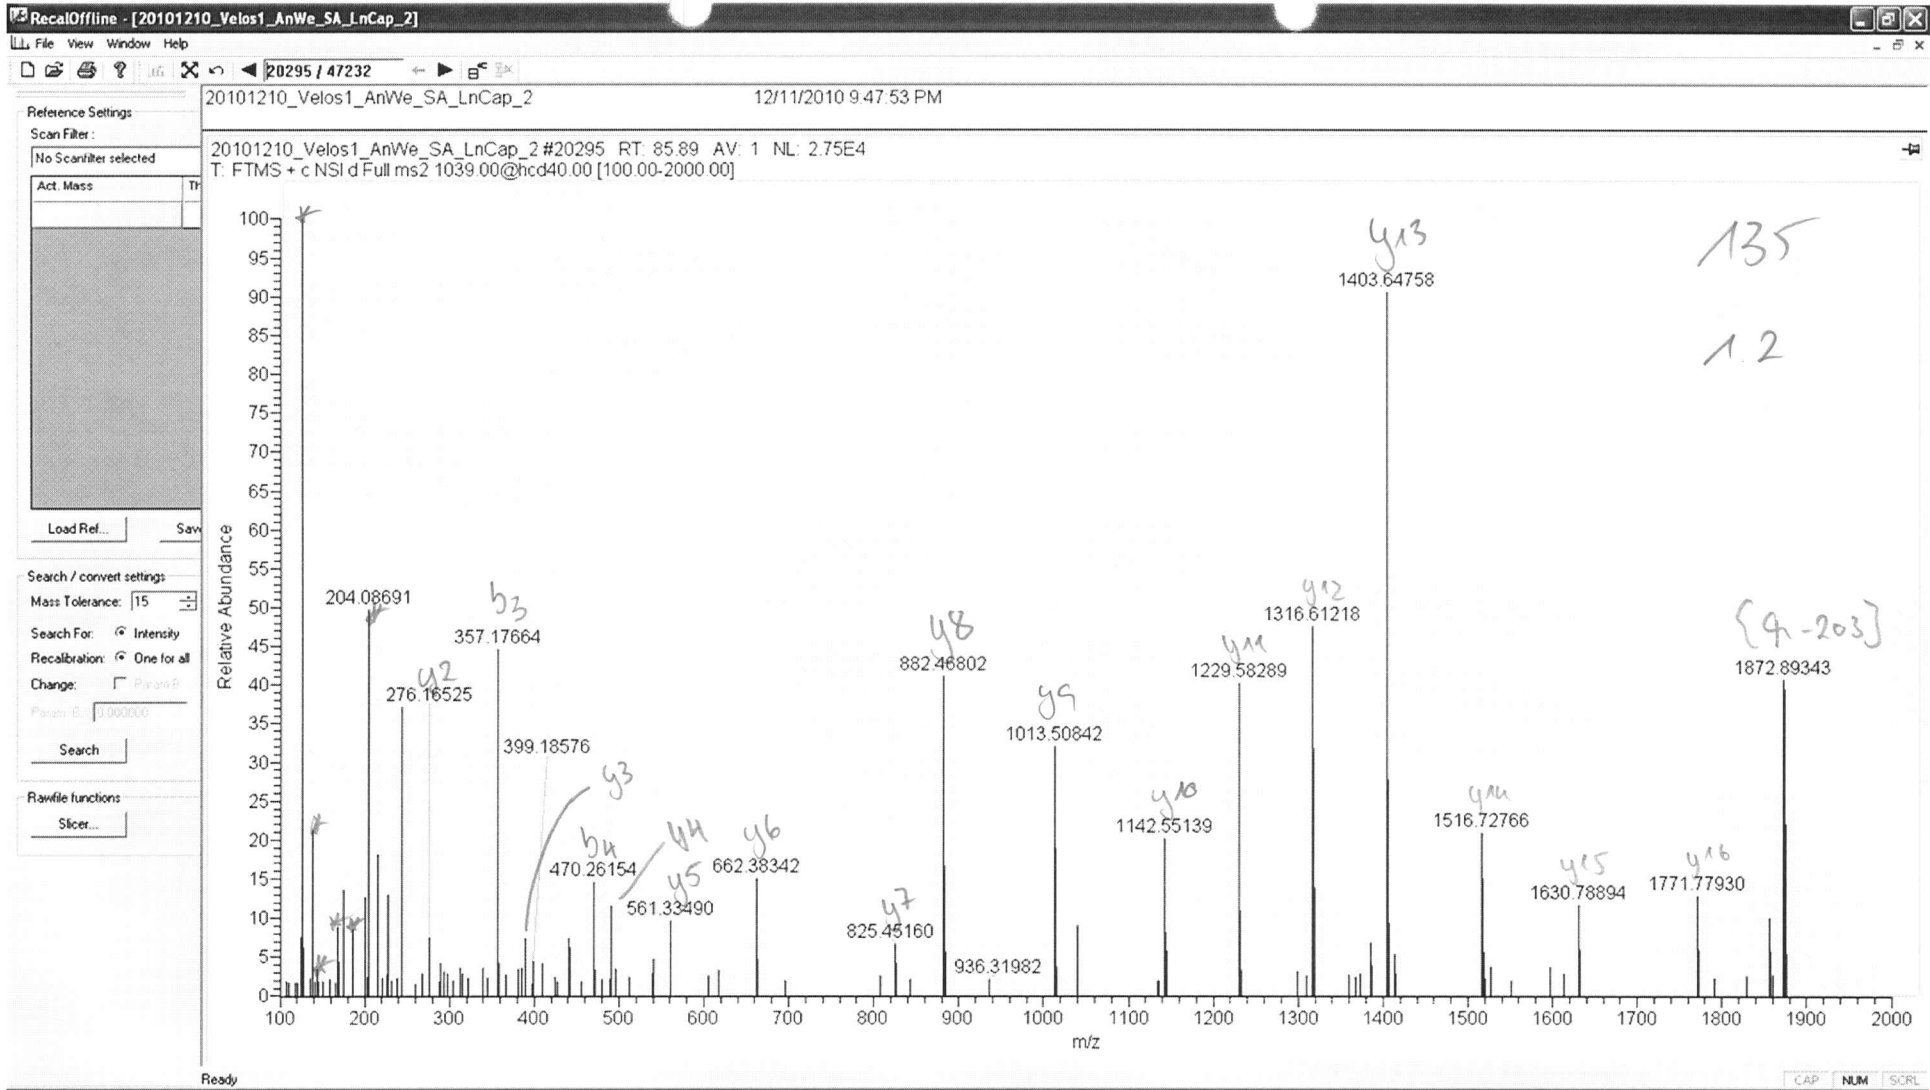

LENLSSEMGYTATLr

no site evidence

80

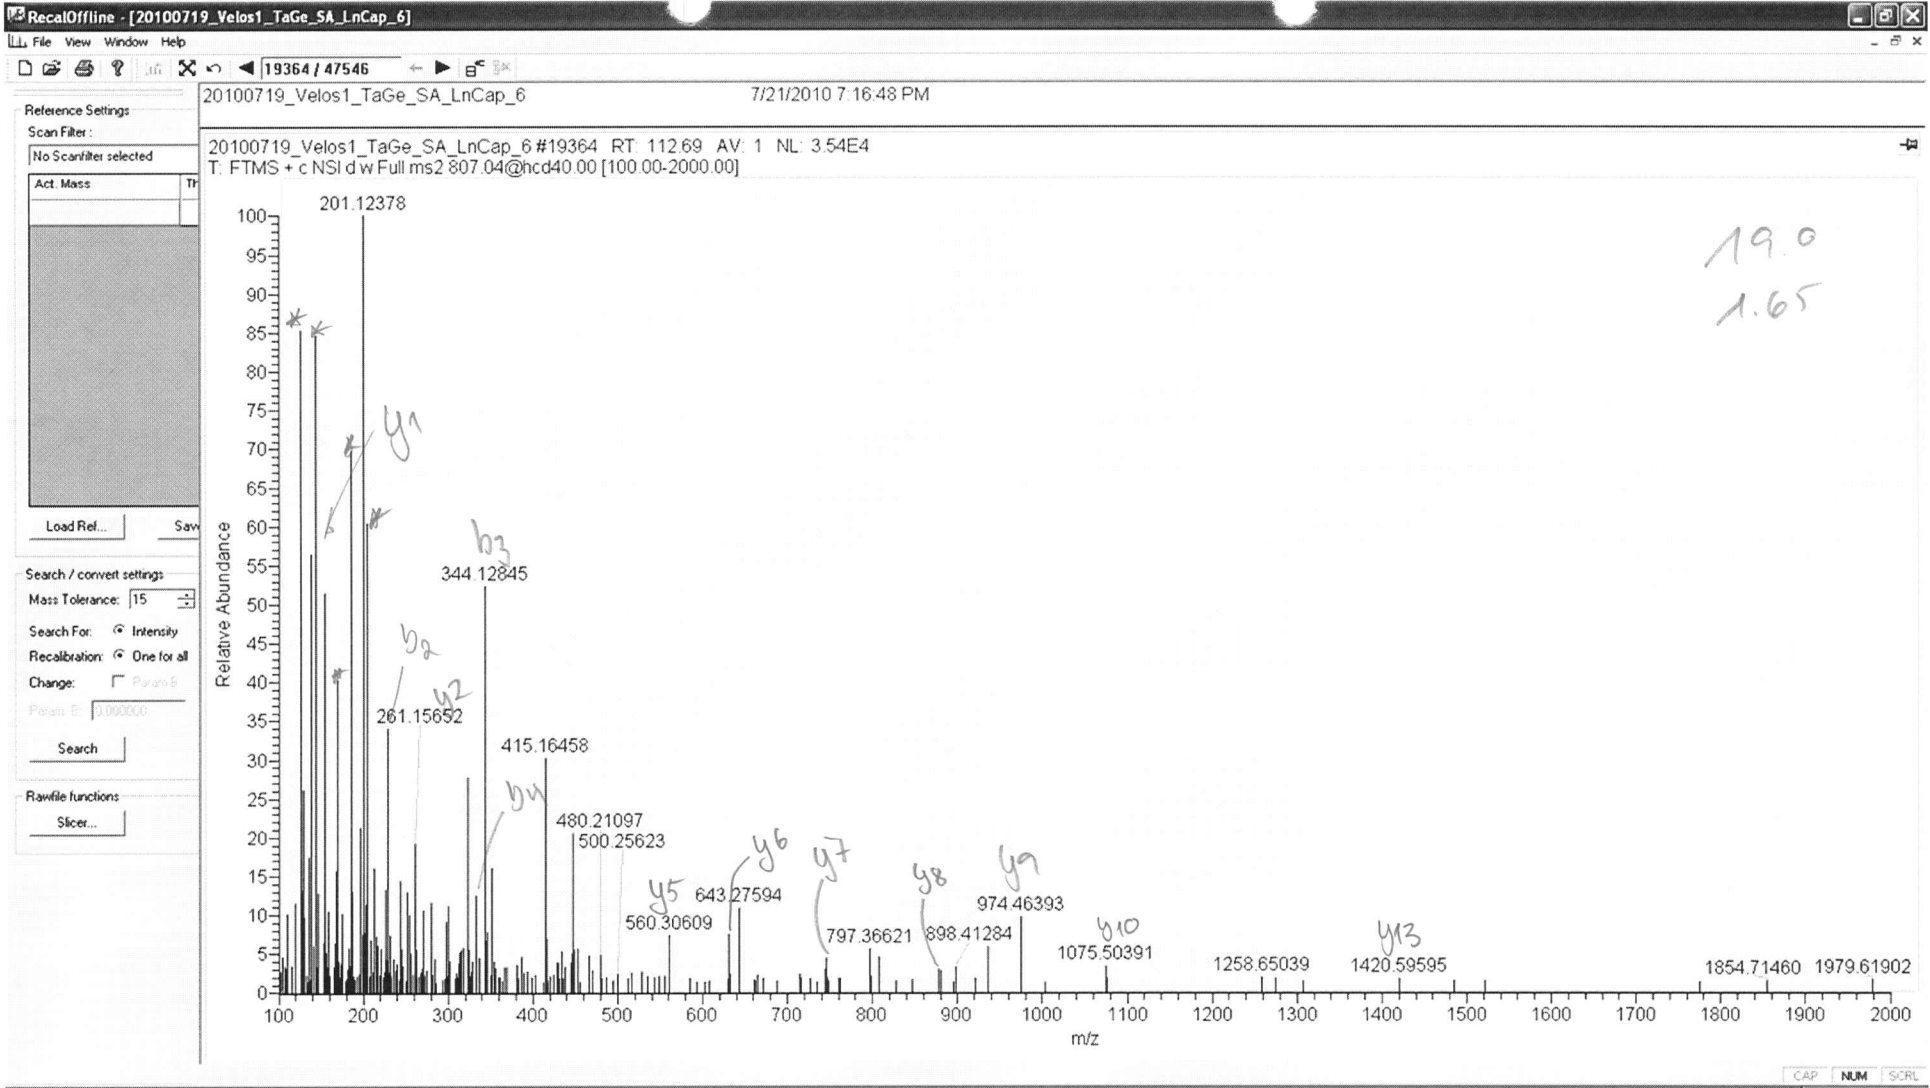

DLDPGPVTTEDTPMDAIDAnK

b3

y9

No site evidence

81

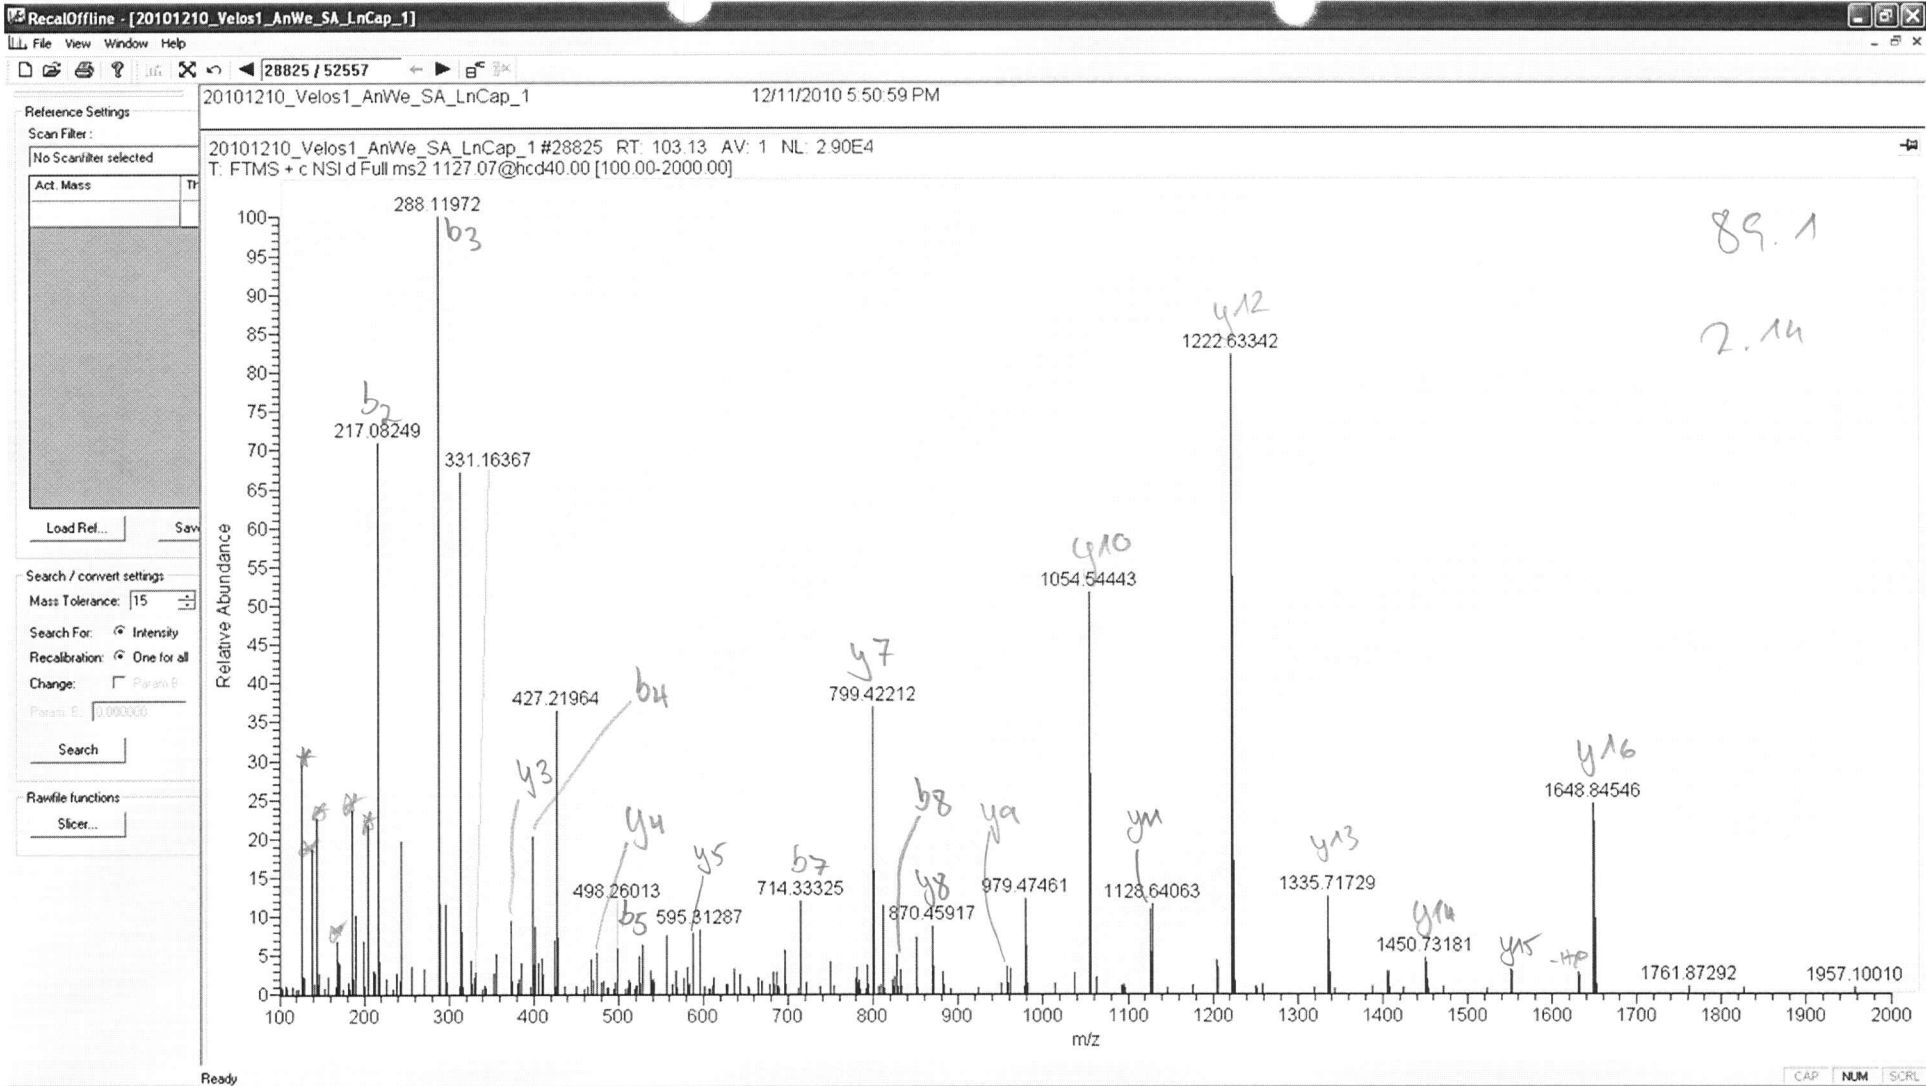

no 8th evidence

SEALPTDLPAPSAPDLtEPK

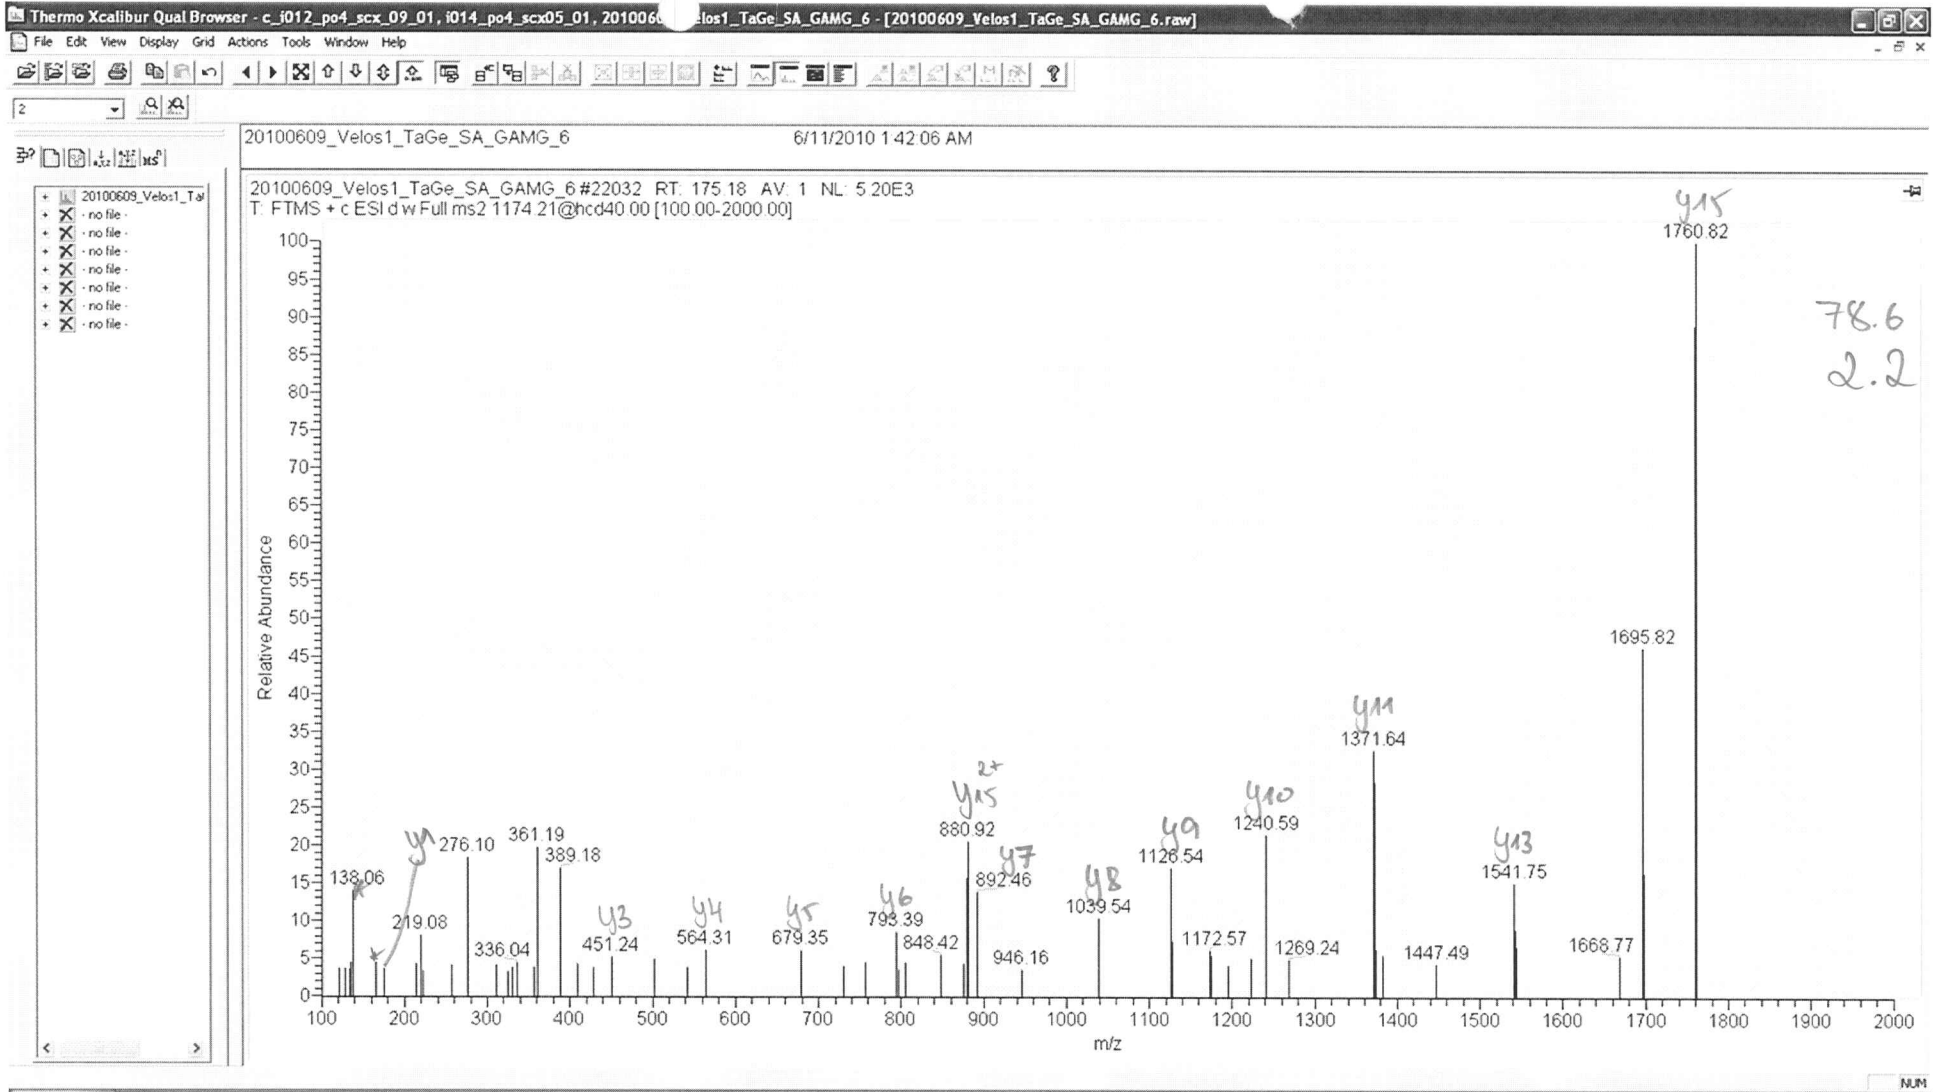

No site evidence

QVHPDtGIssKAMGI mNSFVNDIFER

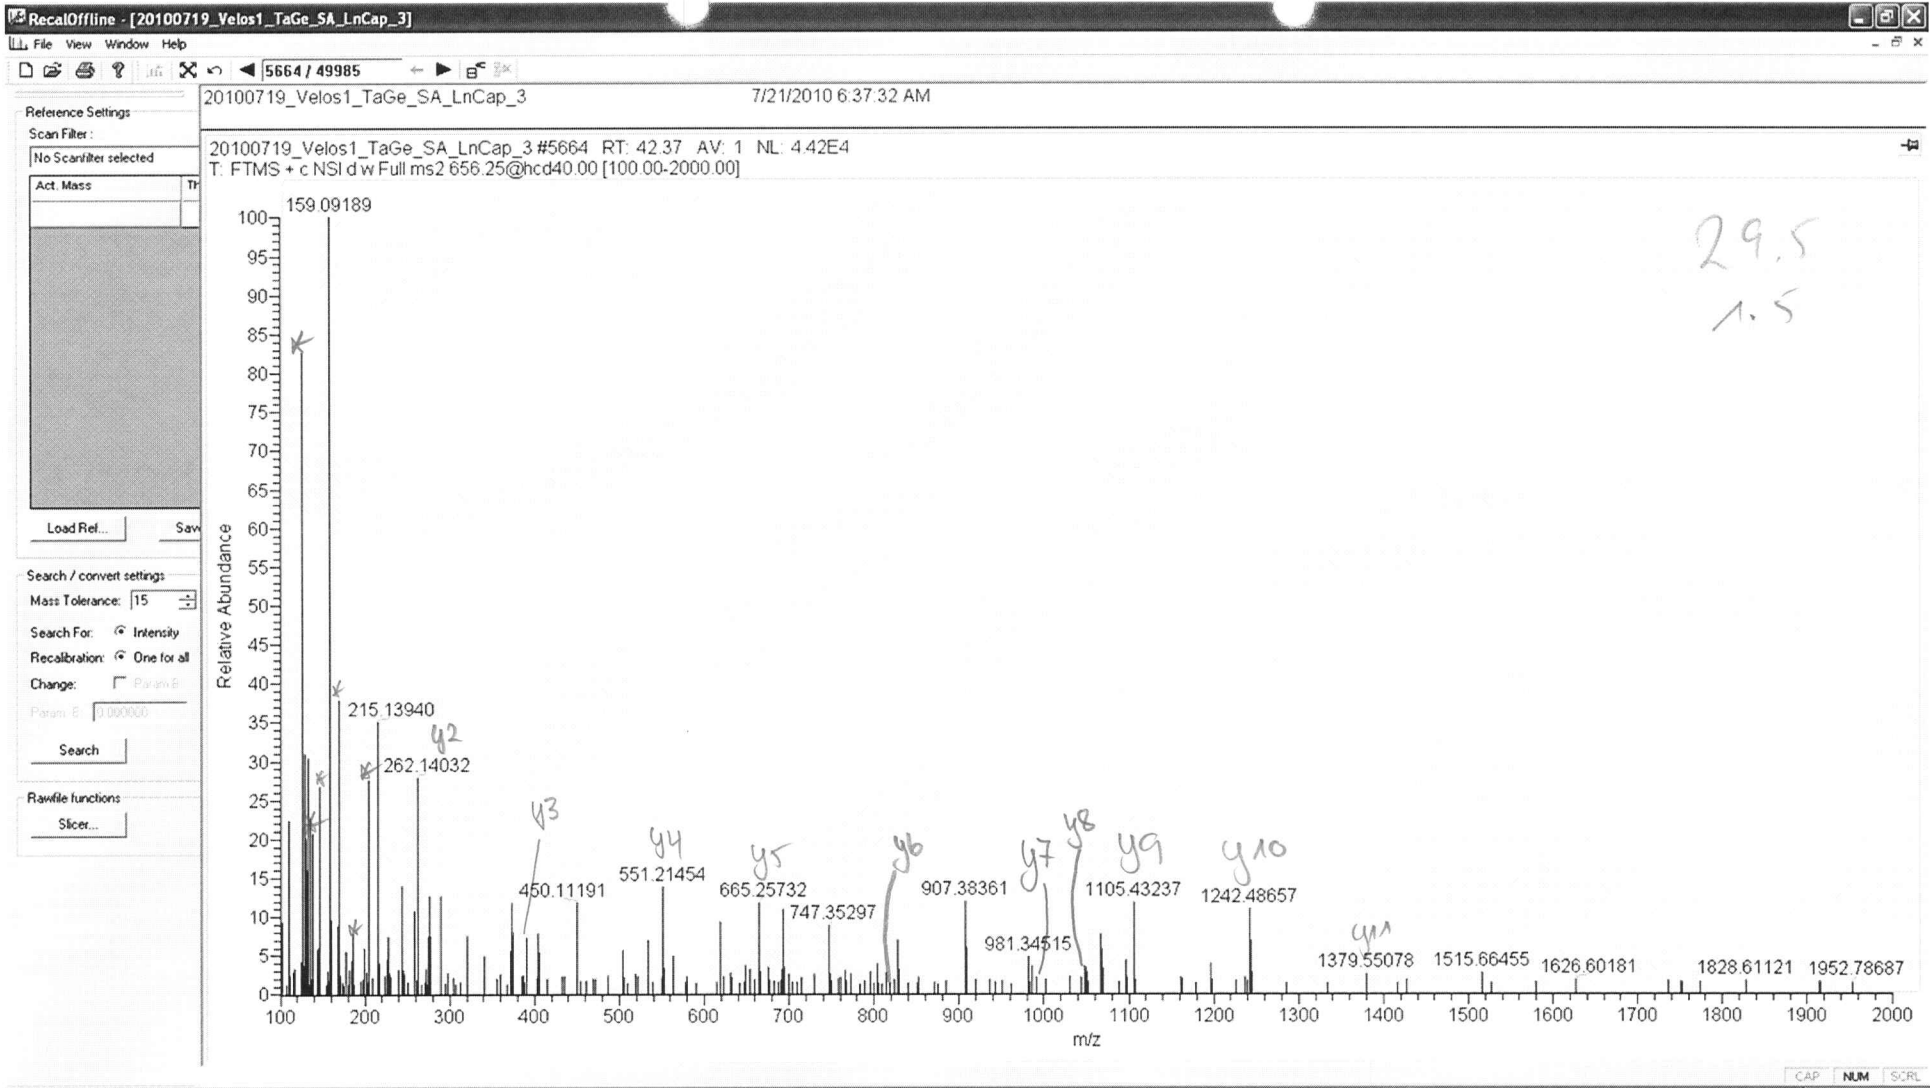

WGQNCscHHGGYYncEDK

No site evidence

84

Reference Settings

Scan Filter:  
No Scanfilter selected

Act. Mass

Load Ref... Save

Search / convert settings

Mass Tolerance: 15

Search For: Intensity

Recalibration: One for all

Change: Param B

Param E: 0.000000

Search

Rawfile functions

Slicer...

20101210\_Velos1\_AnWe\_SA\_MCF7\_1#1882 RT: 12.15 AV: 1 NL: 3.62E4  
T: FTMS + c NSI d Full ms2 519.76@hcd40.00 [100.00-1050.00]

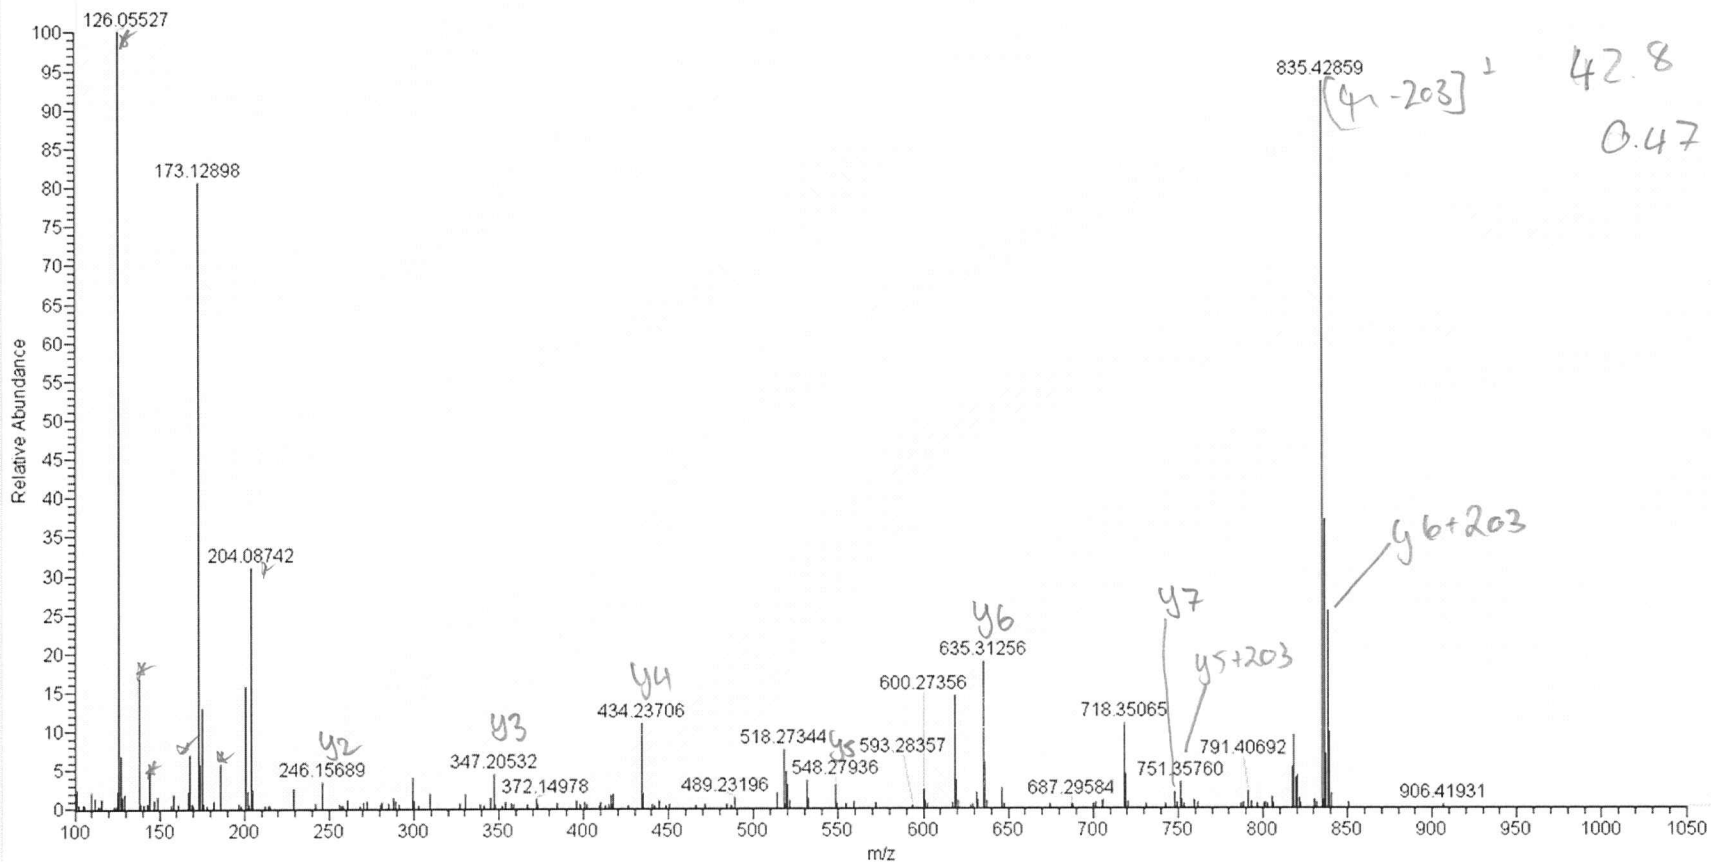

y5 y4  
SLSnSTAR

104

87

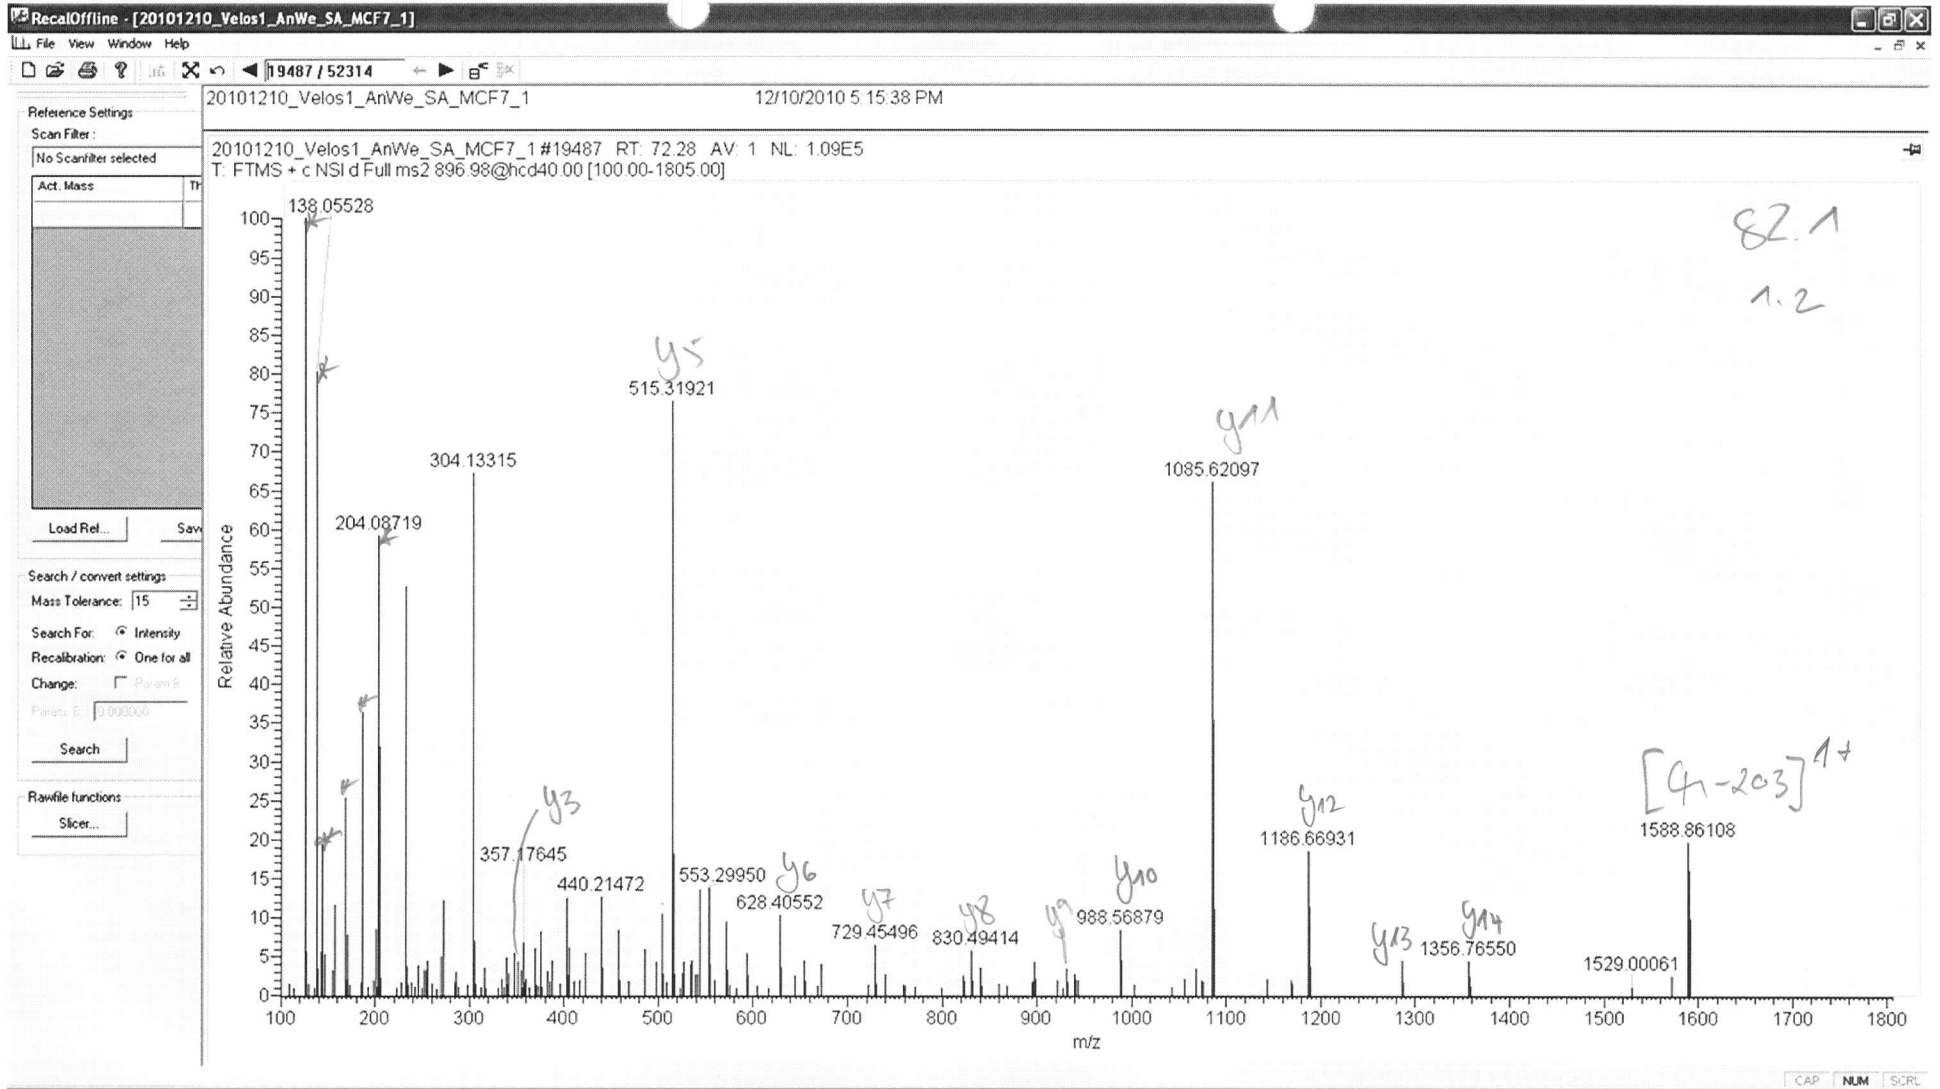

No site evidence

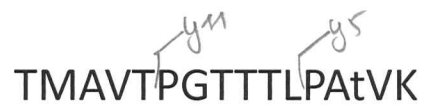

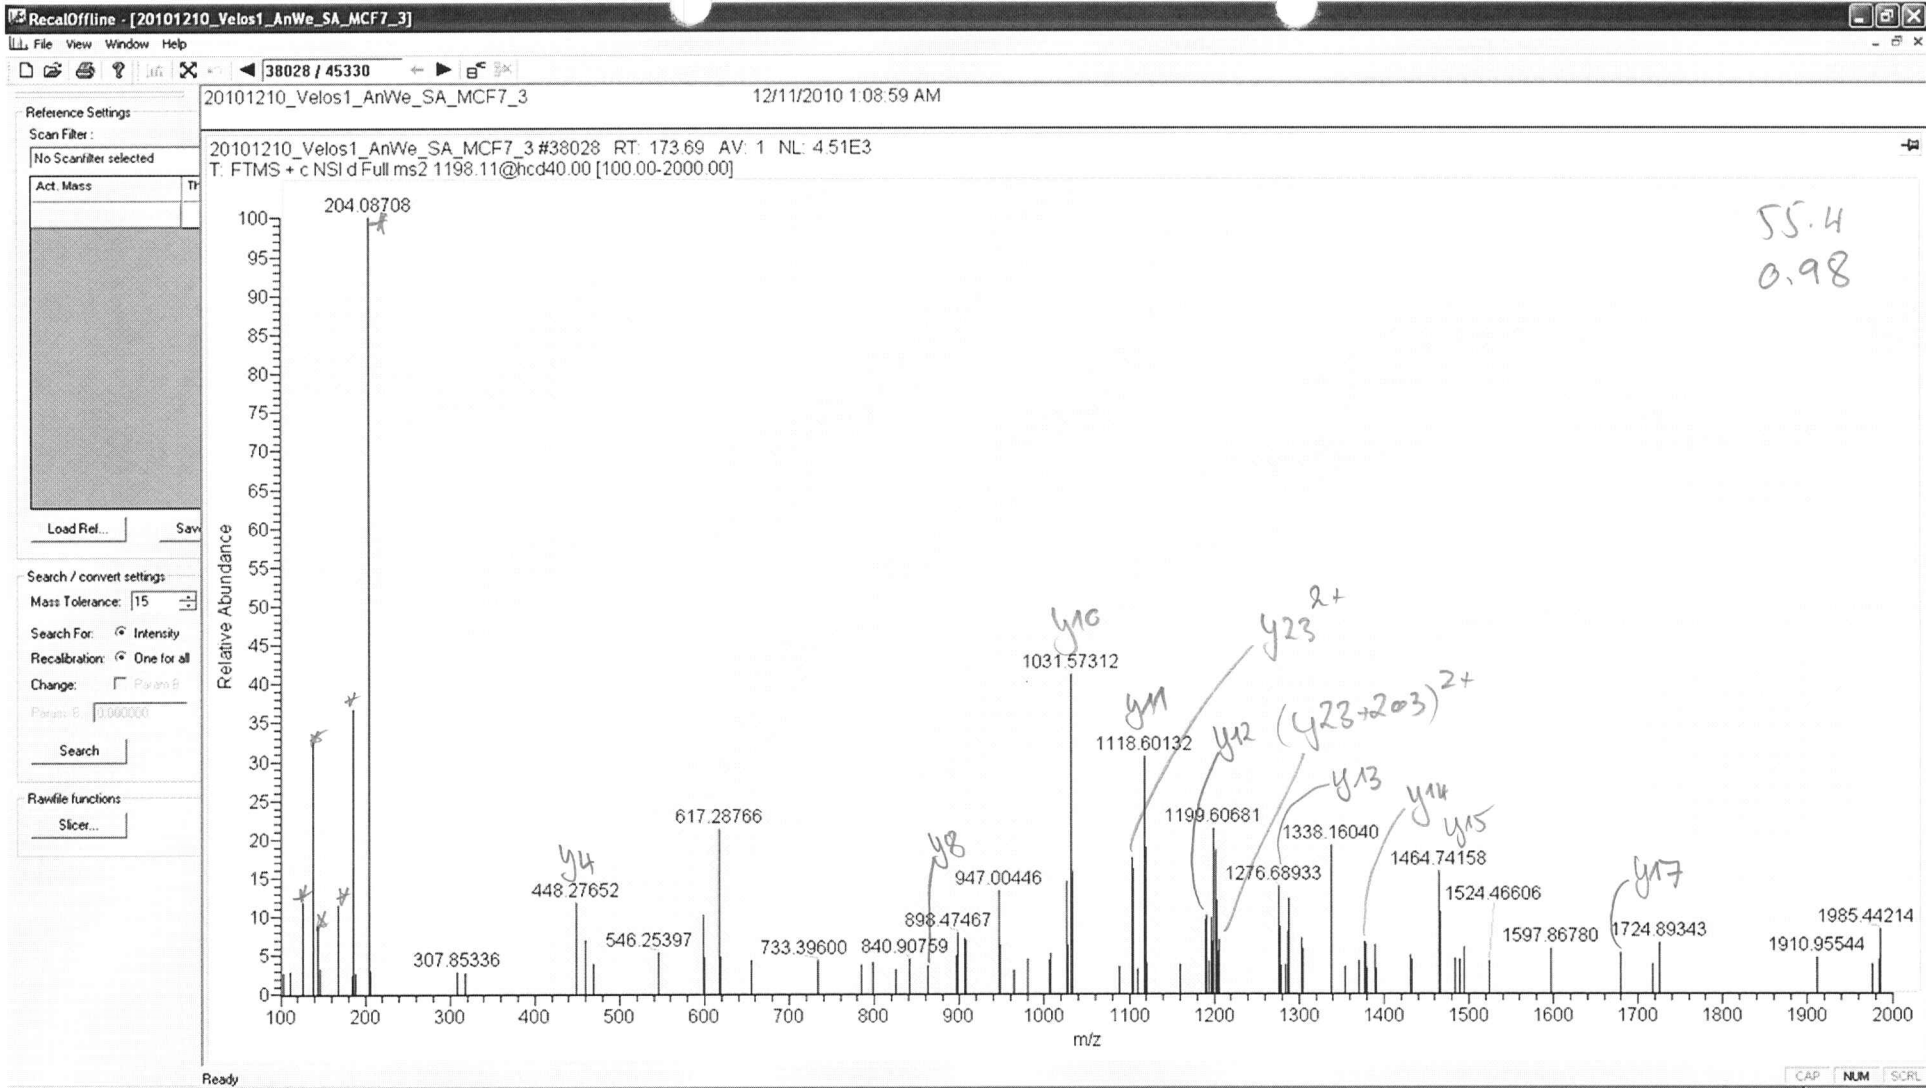

TQTQSAPALQGLSSLLQsVTGNPVPASEAASQSTSA  
 SPANTTVSTIK

Site @  
 S27, 31, 33  
 T34, S35 or 37



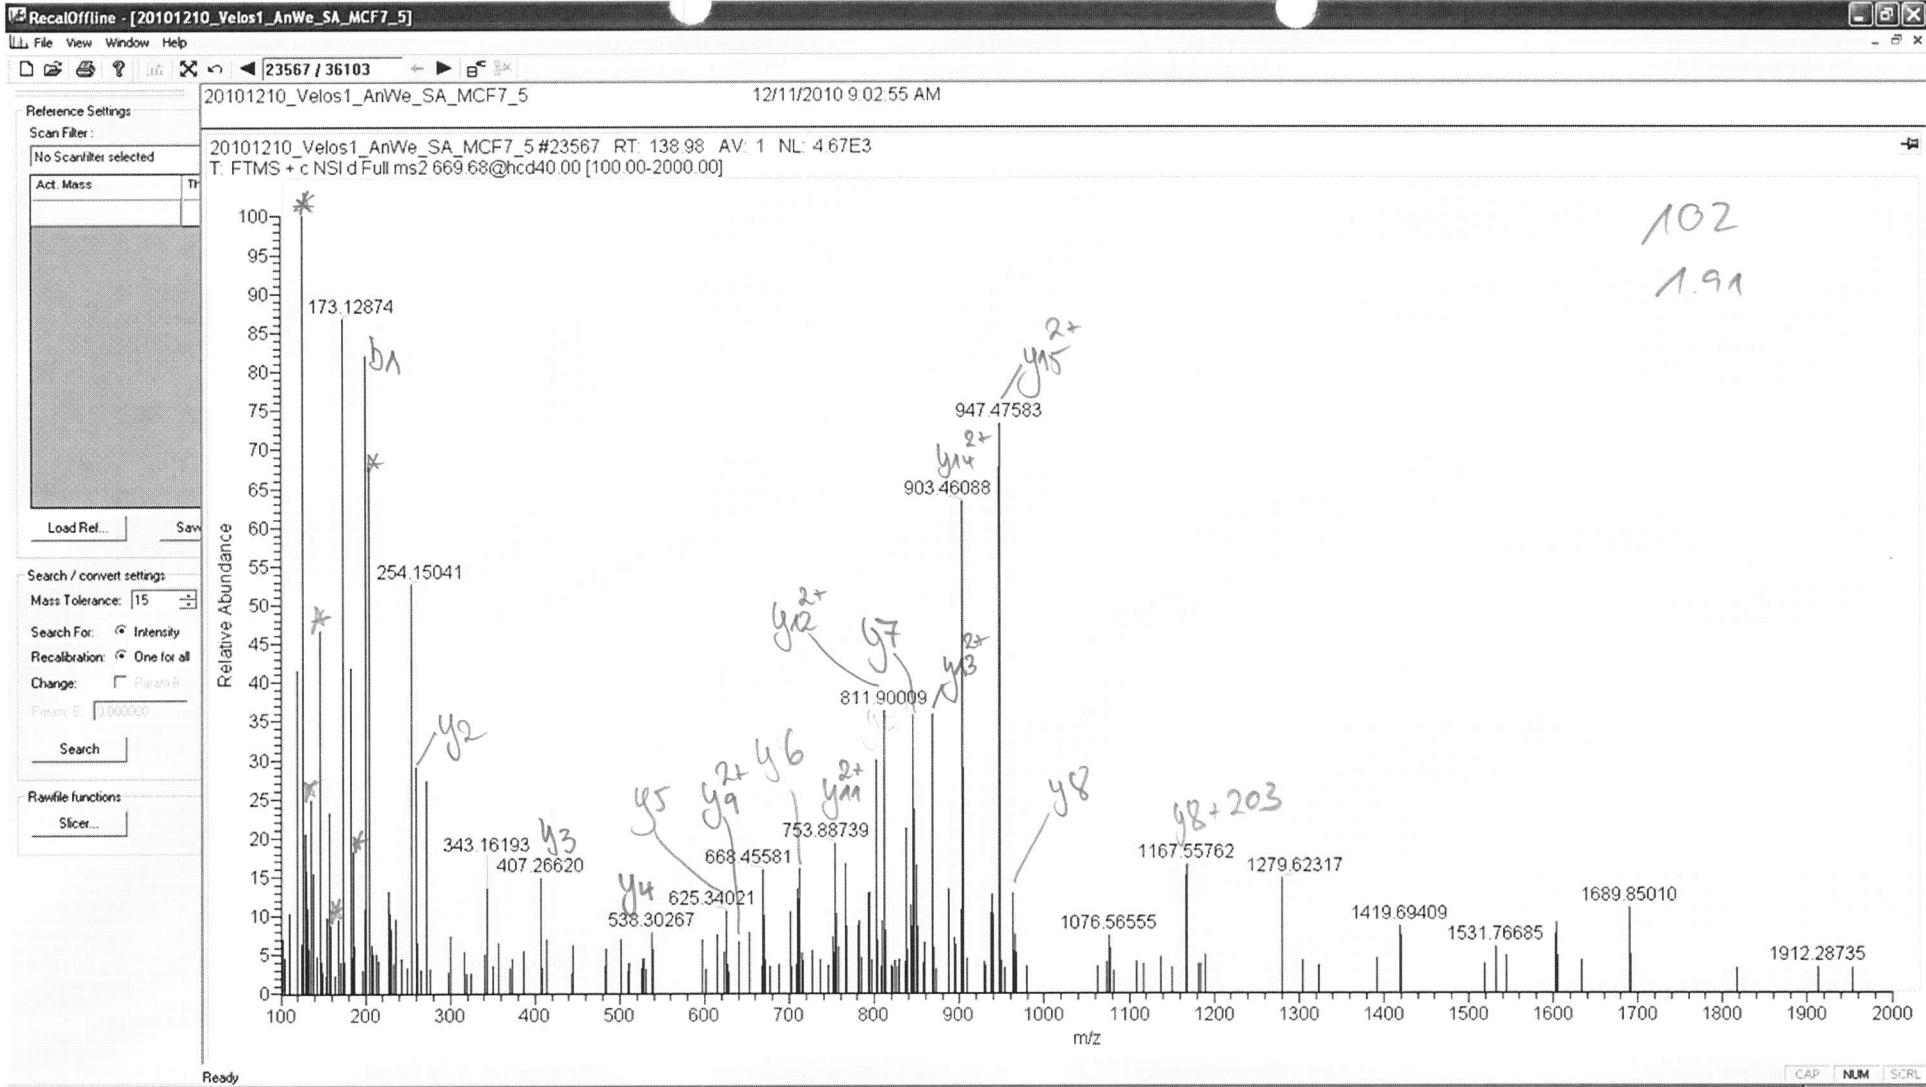

LSALDnLLNHSSMFLK

90

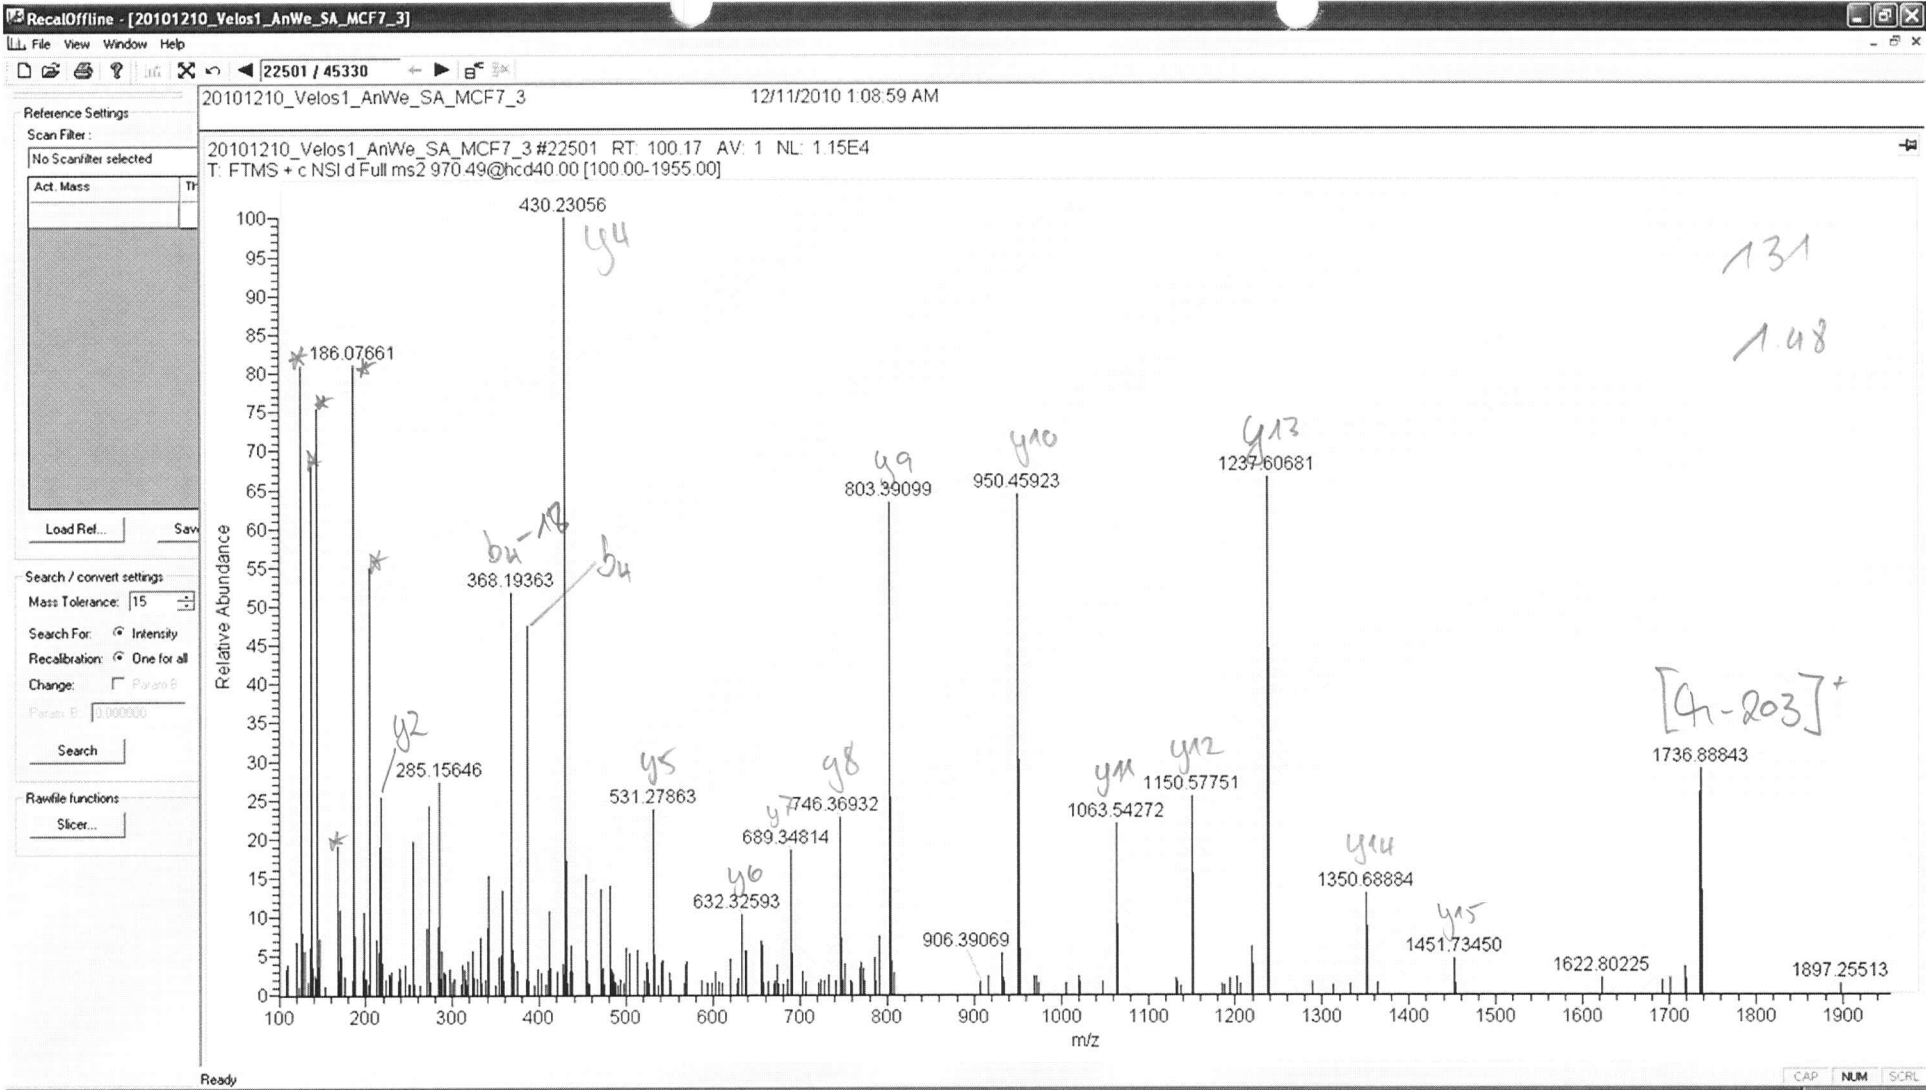

No site evidence

LGNTISSLFGGGTtPDAK

20100719\_Velos1\_TaGe\_SA\_MCF7\_01 #37673 RT: 154.38 AV: 1 NL: 2.52E4  
T: FTMS + c NSI d w Full ms2 1141.08@hcd40.00 [100.00-2000.00]

Reference Settings

Scan Filter:

No Scanfilter selected

| Act. Mass | Theo. Mass | Use |
|-----------|------------|-----|
|           |            |     |

Load Ref...

Save Ref...

Save Ref As...

Search / convert settings

Mass Tolerance: 15 ± [ppm]

Search For: Intensity Close-by

Recalibration: One for all Per scan

Change: Param B Param C Manual

Param B: 0.000000

Param C: 1984s1189.917

Search

Convert...

Rawfile functions

Slicer...

QualBrowser

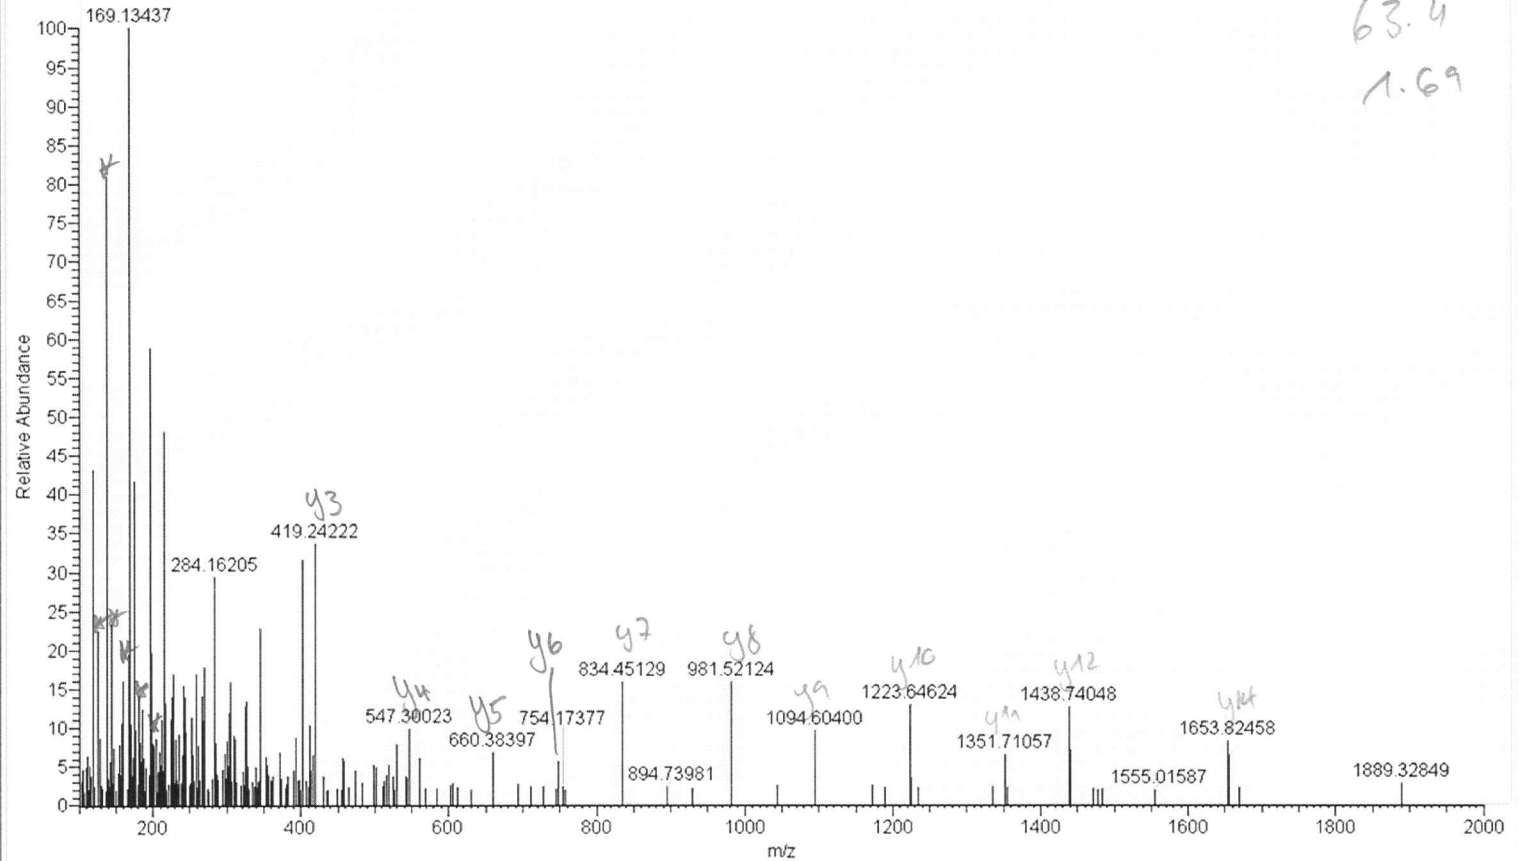

Ready

CAP NUM SCRL

*No definite evidence*

GGLPVSQSQEIFSsLQPFR

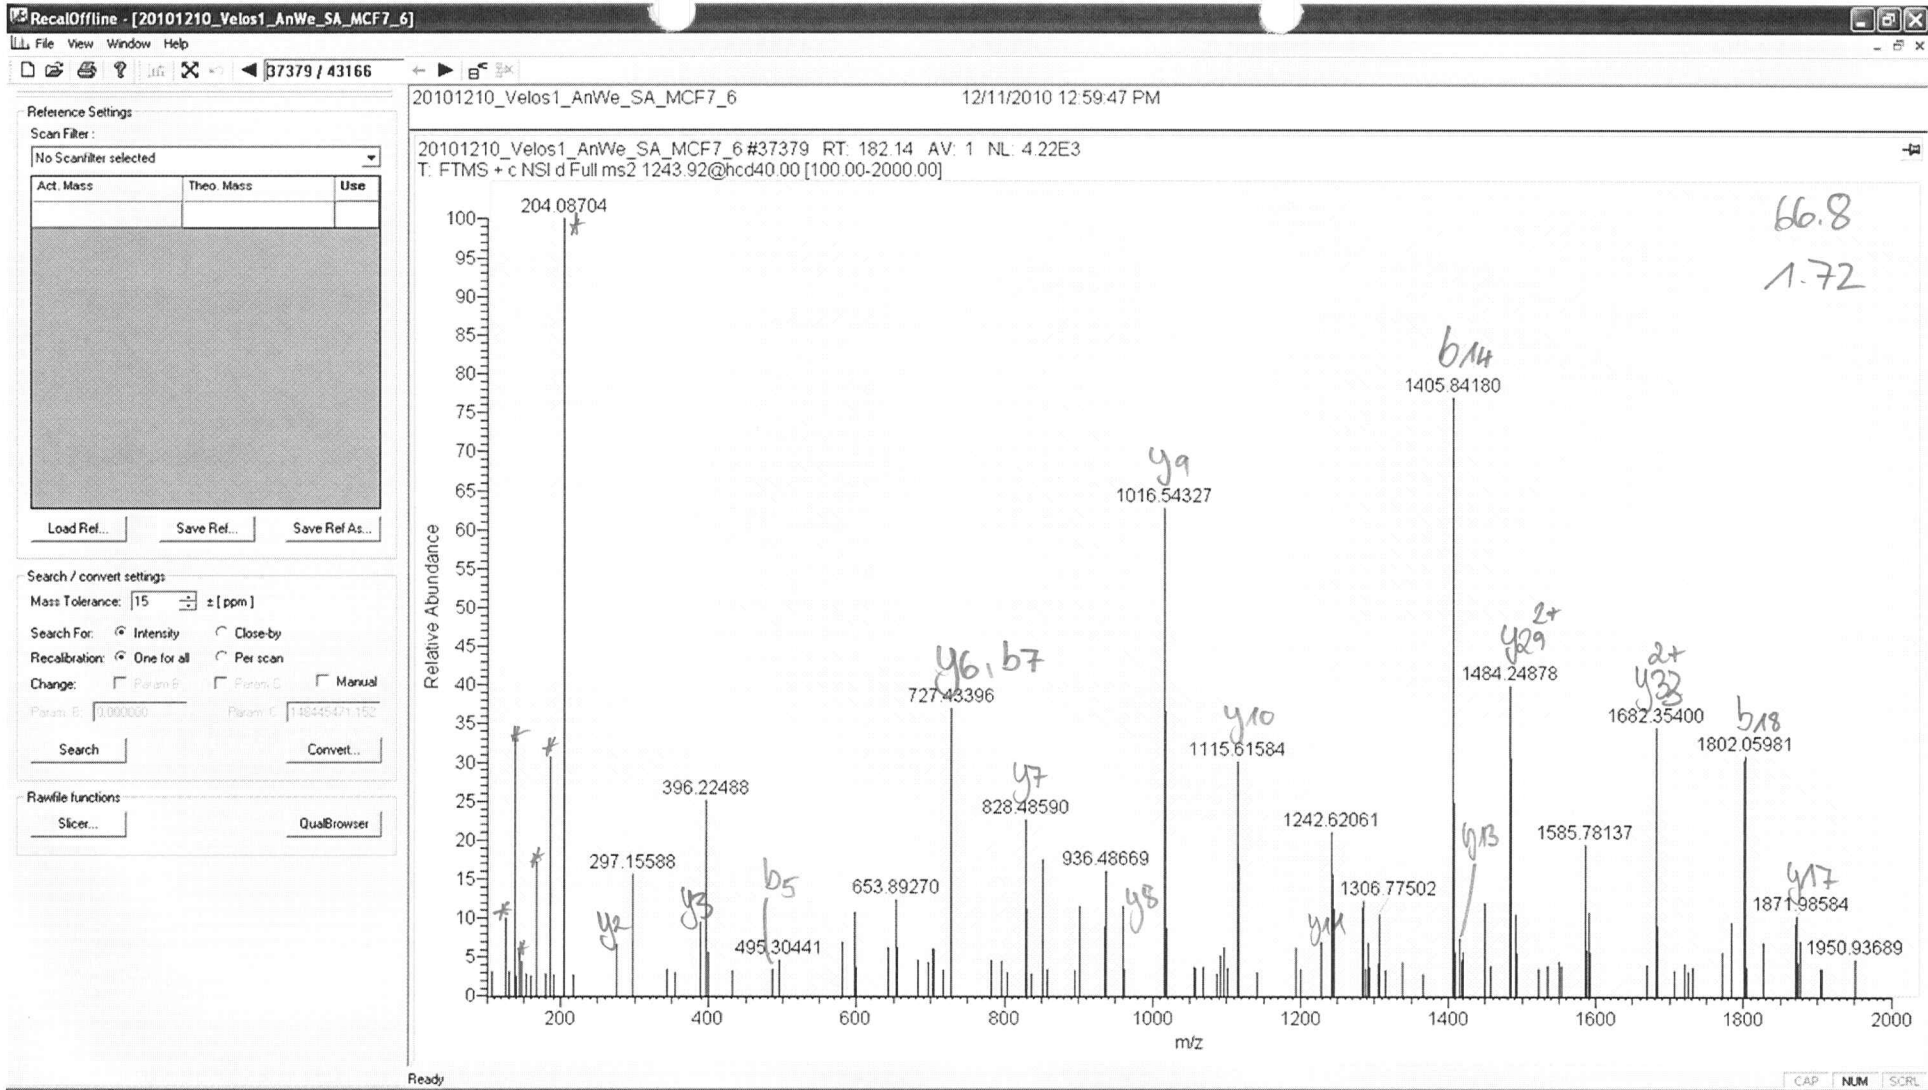

EALATLKPQAGLIVPQAVPSSQPSVVGAGEPMDLGEVGMtPEIIQK

b14

y6

no site evidence

20100719\_Velos1\_TaGe\_SA\_MCF7\_01 #49868 RT: 211.49 AV: 1 NL: 2.19E3  
T: FTMS + c NSI d w Full ms2 1032.53@hcd40.00 [100.00-2000.00]

Reference Settings

Scan Filter:  
No Scanfilter selected

| Act. Mass | Theo. Mass | Use |
|-----------|------------|-----|
|           |            |     |

Load Ref... Save Ref... Save Ref As...

Search / convert settings:

Mass Tolerance: 15 ± [ppm]

Search For:  Intensity  Close-by

Recalibration:  One for all  Per scan

Change:  Param B  Param C  Manual

Param B: 0.000000 Param C: 1.884s11.69 917

Search Convert...

Rawfile functions:

Slicer... QualBrowser

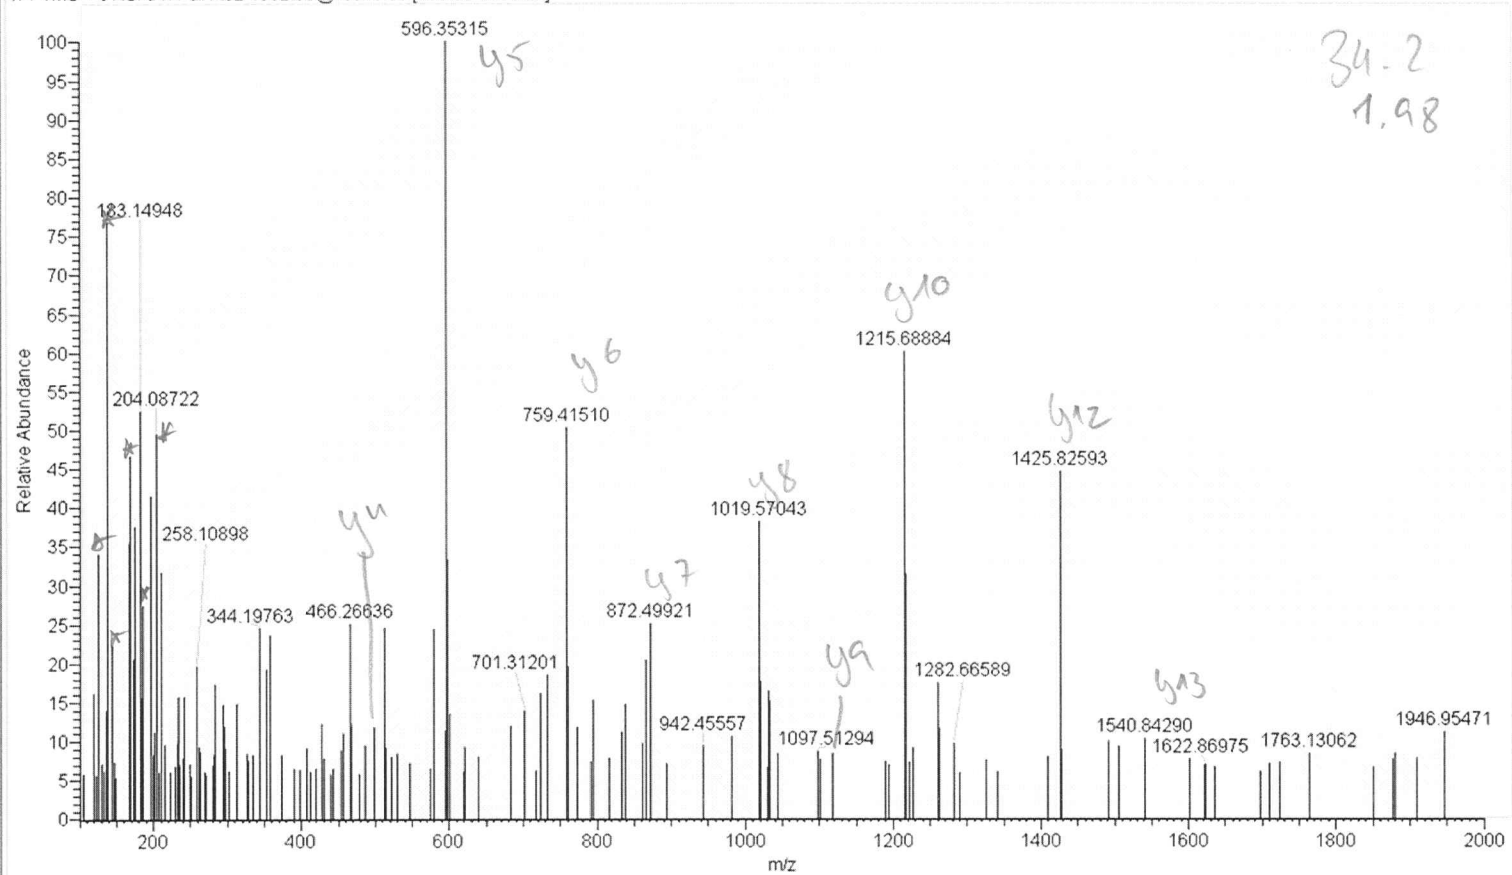

34.2  
1.98

Ready

CAP NUM SCRL

TVPVsSNDTPPSALQEAAPLTSSMDPLPVFLYPPVQR

~~R~~

no site evidence

95

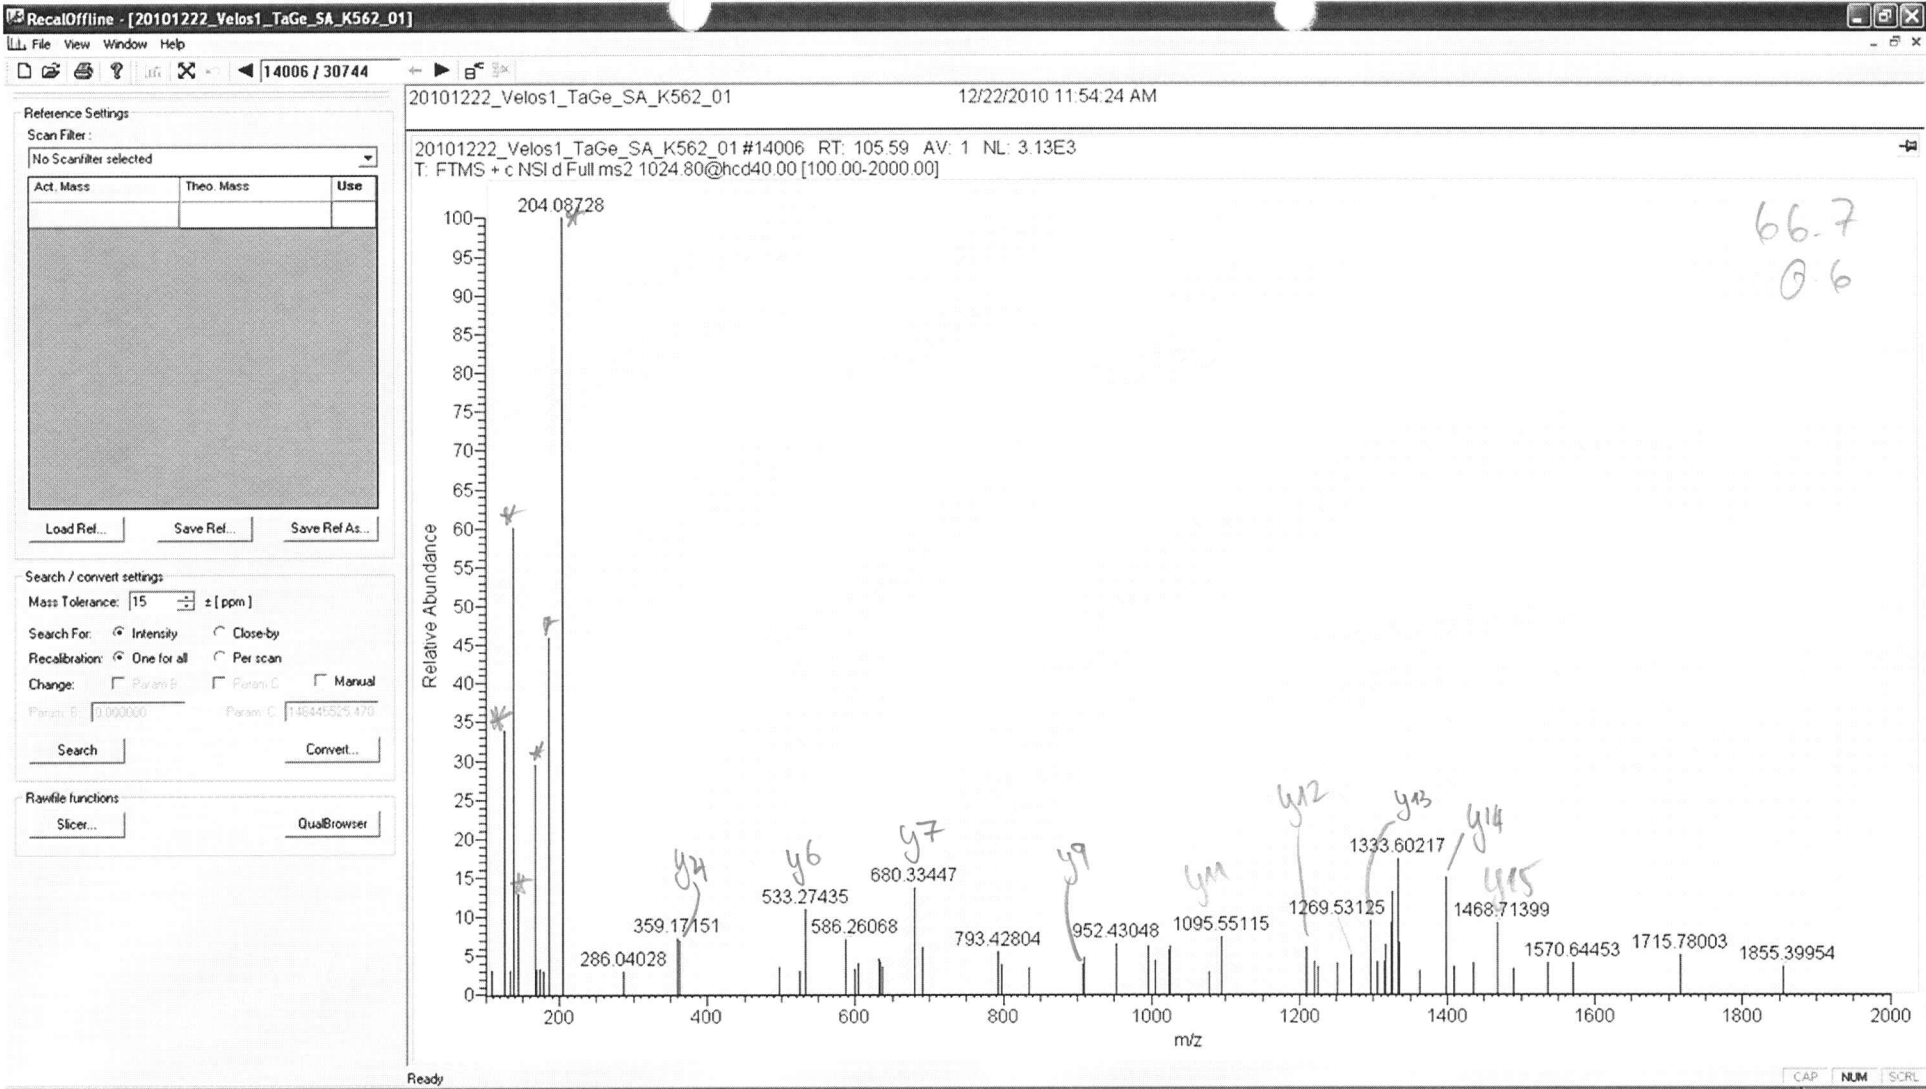

<sup>y6</sup>  
NPFSSASGGFGSTATSNTSNLFGnsGAK

No site  
evidence

20101222\_Velos1\_TaGe\_SA\_K562\_01#13455 RT: 102.69 AV: 1 NL: 1.84E4  
T: FTMS + c NSI d Full ms2 778.76@hcd40.00 [100.00-2000.00]

Reference Settings

Scan Filter:

No Scanfilter selected

| Act. Mass | Theo. Mass | Use |
|-----------|------------|-----|
|           |            |     |

Load Ref...

Save Ref...

Save Ref As...

Search / convert settings

Mass Tolerance: 15 ± [ppm]

Search For:  Intensity  Close-by

Recalibration:  One for all  Per scan

Change:  Param.B  Param.C  Manual

Param. B: 0.000000

Param. C: 148445525.470

Search

Convert...

Rawfile functions

Slicer...

QuasiBrowser

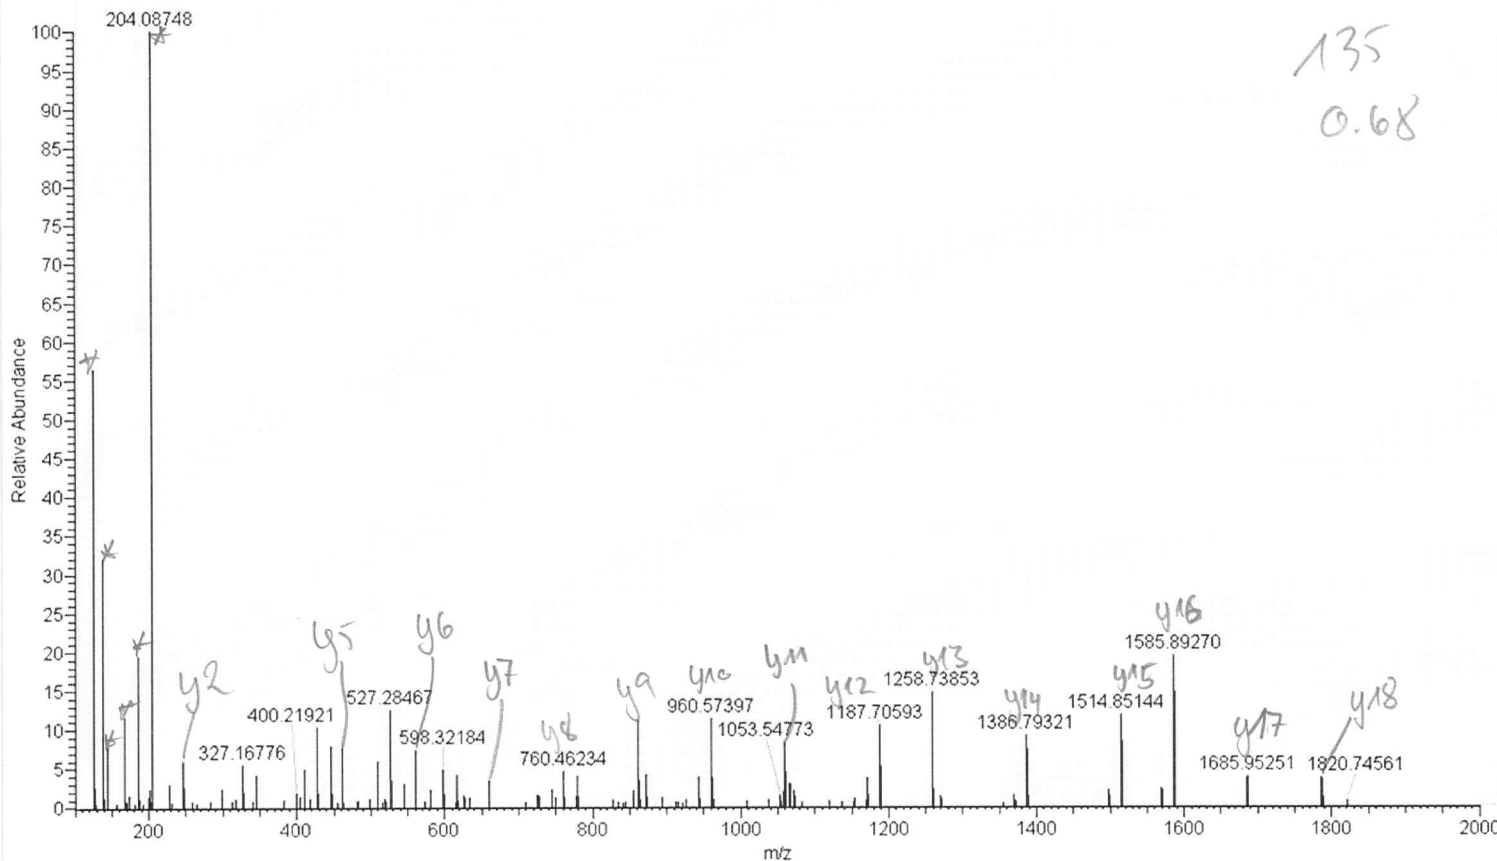

135  
0.68

Ready

CAP NUM SCRL

no date evidence

y9  
y8

SGTVtVAQQAQVTTTVGGVTK

97



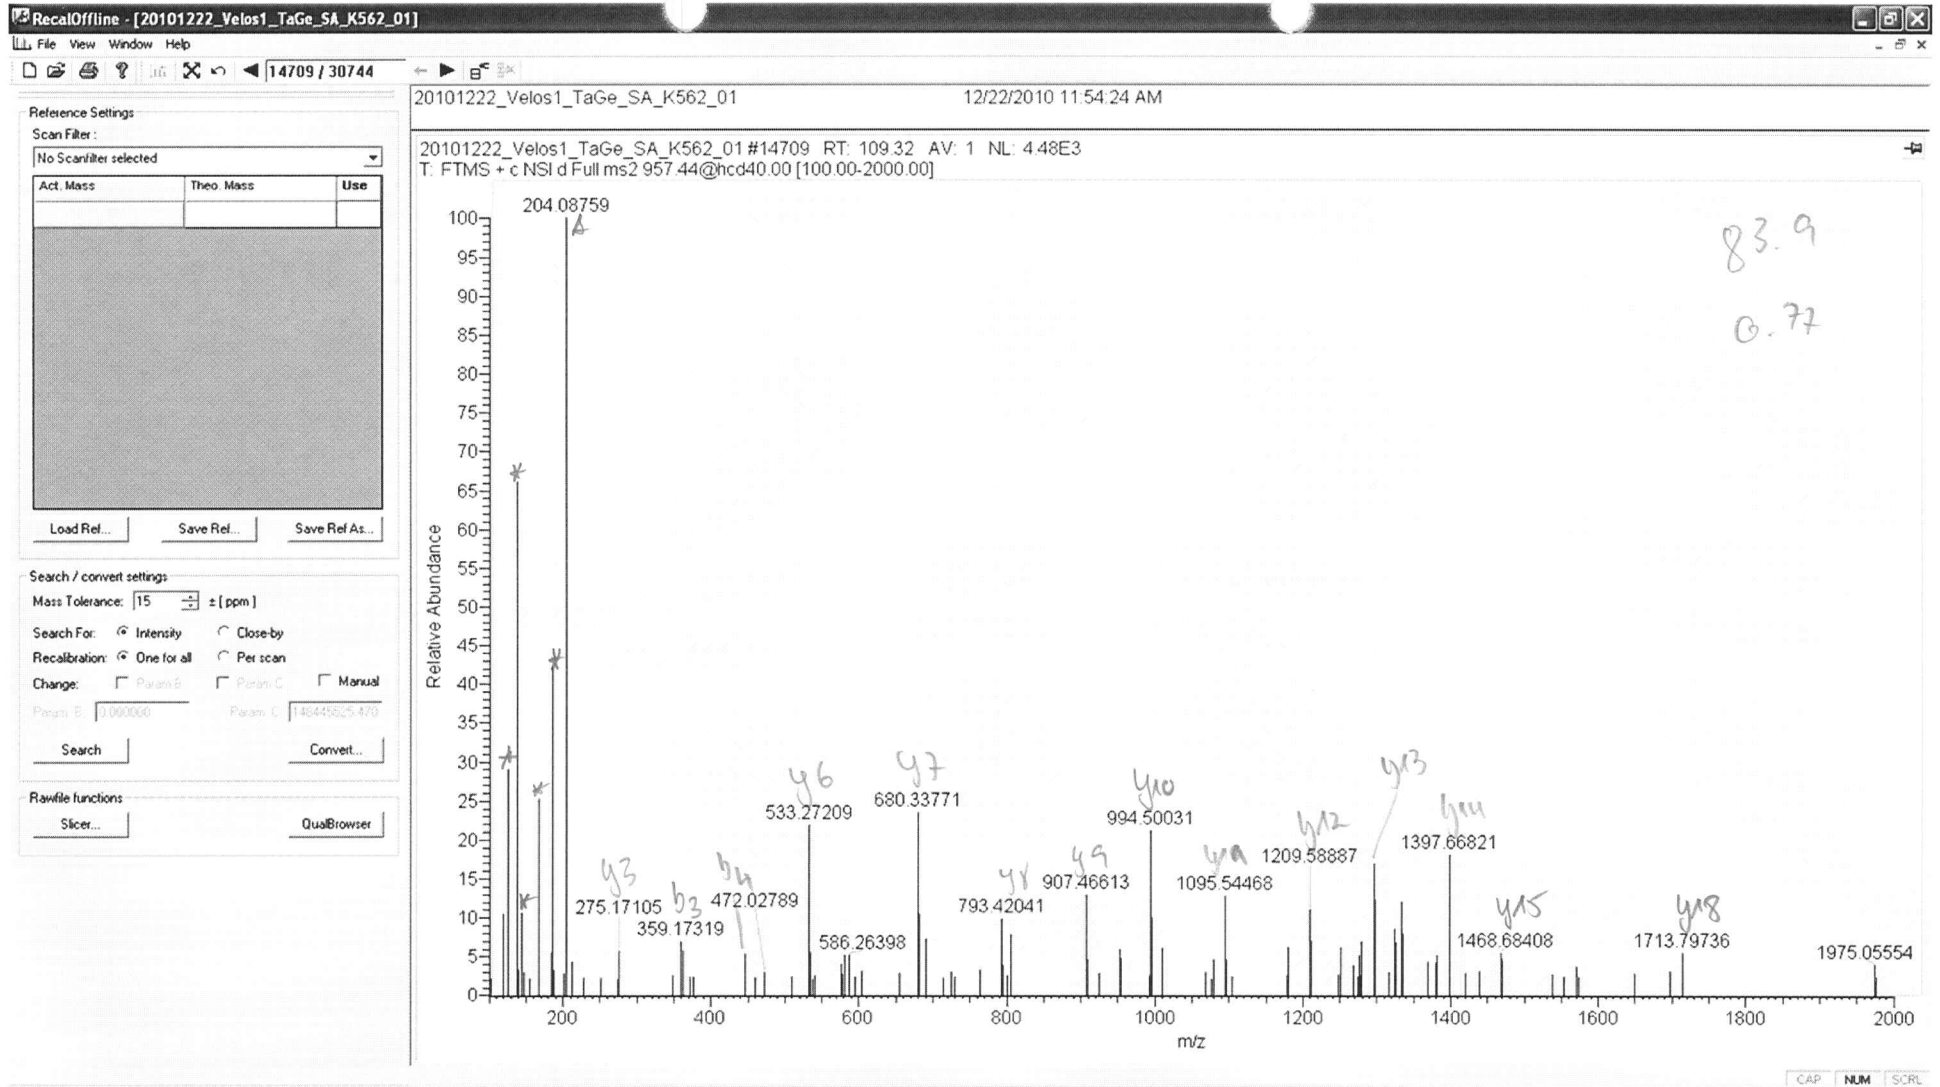

NPFSASGGFGStATSNTSNLFGNSGAK

no site evidence



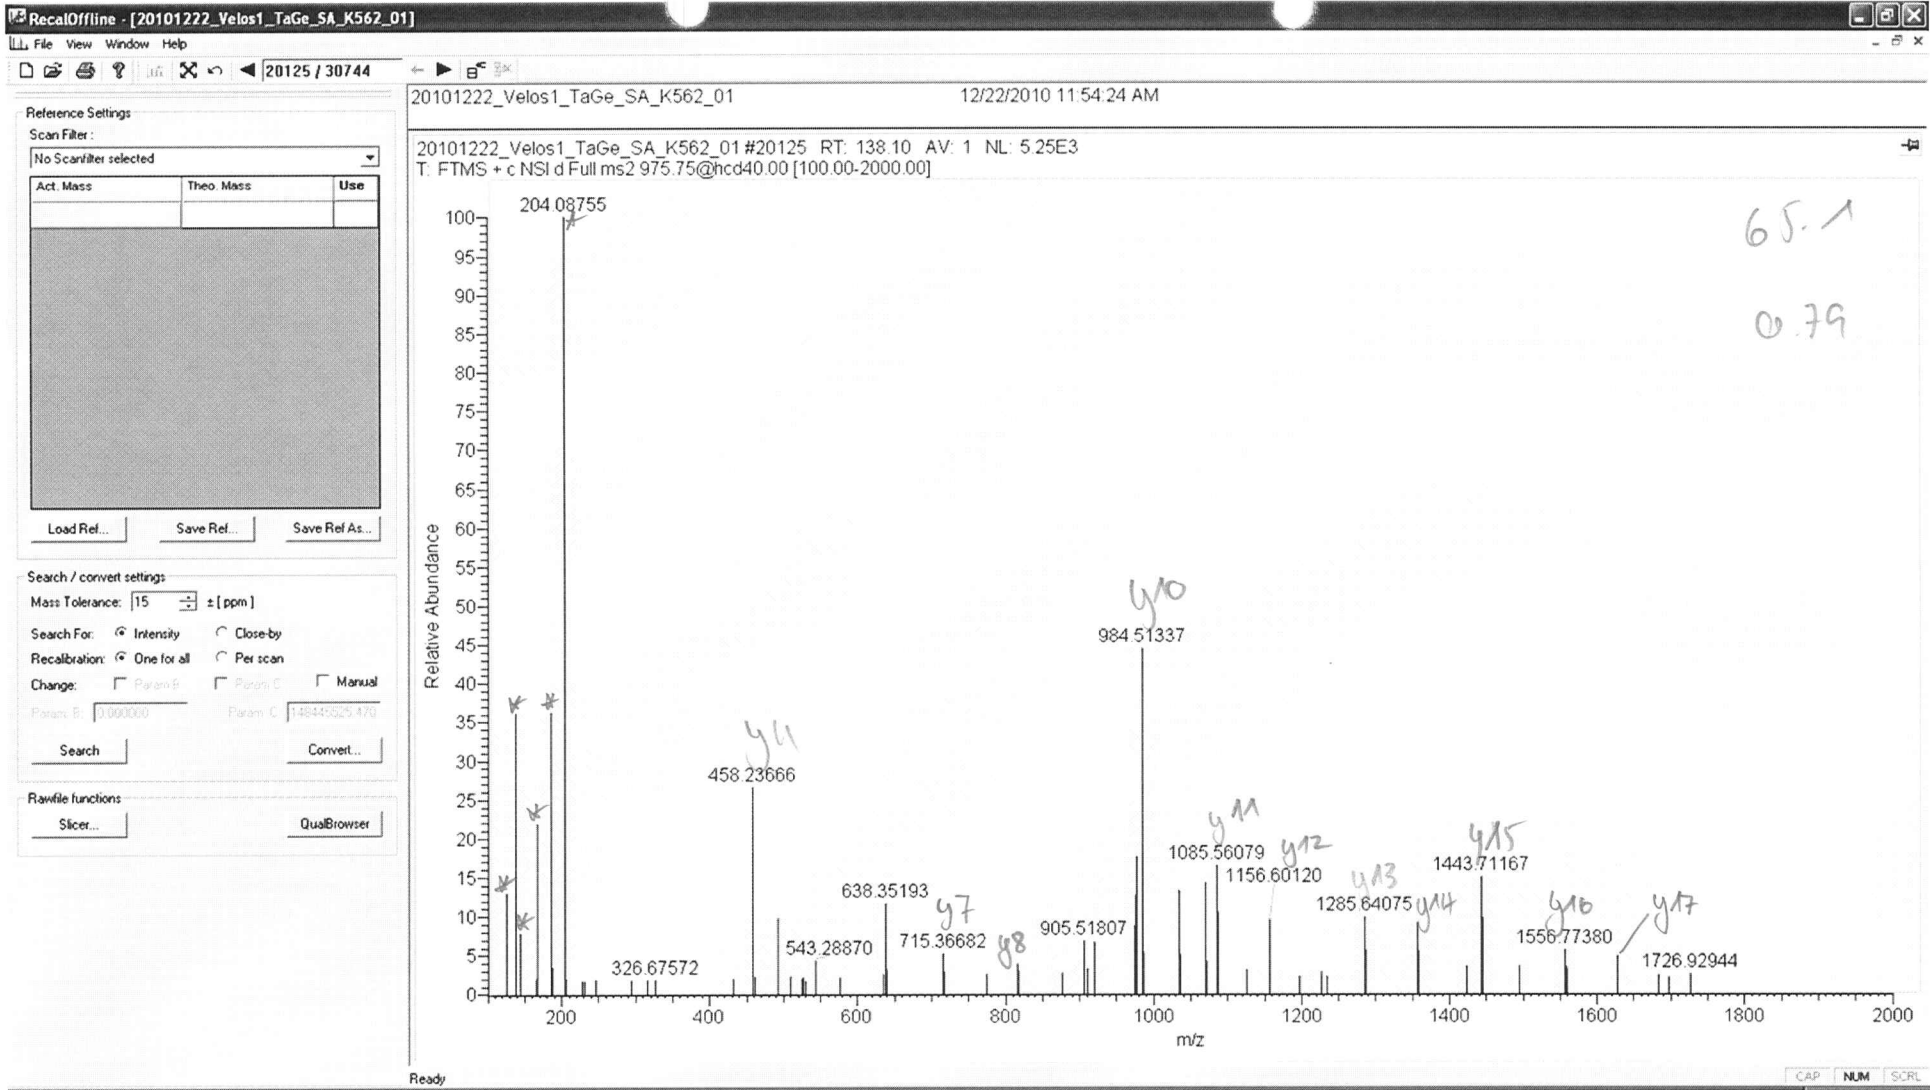

EPVLAQPAVSNSGTAASSTSLVALSAEATPATtGVPDAR

no site evidence

99

20101222\_Velos1\_TaGe\_SA\_K562\_01#11841 RT: 94.13 AV: 1 NL: 4.86E3  
T: FTMS + c NSI d Full ms2 997.52@hcd40.00 [100.00-2000.00]

Reference Settings

Scan Filter:  
No Scanfilter selected

| Act. Mass | Theo. Mass | Use |
|-----------|------------|-----|
|           |            |     |

Load Ref... Save Ref... Save Ref As...

Search / convert settings

Mass Tolerance: 15 ± [ppm]

Search For:  Intensity  Close-by

Recalibration:  One for all  Per scan

Change:  Param. B  Param. C  Manual

Param. B: 1.000000 Param. C: 148445825.470

Search Convert...

Rawfile functions

Slicer... QualBrowser

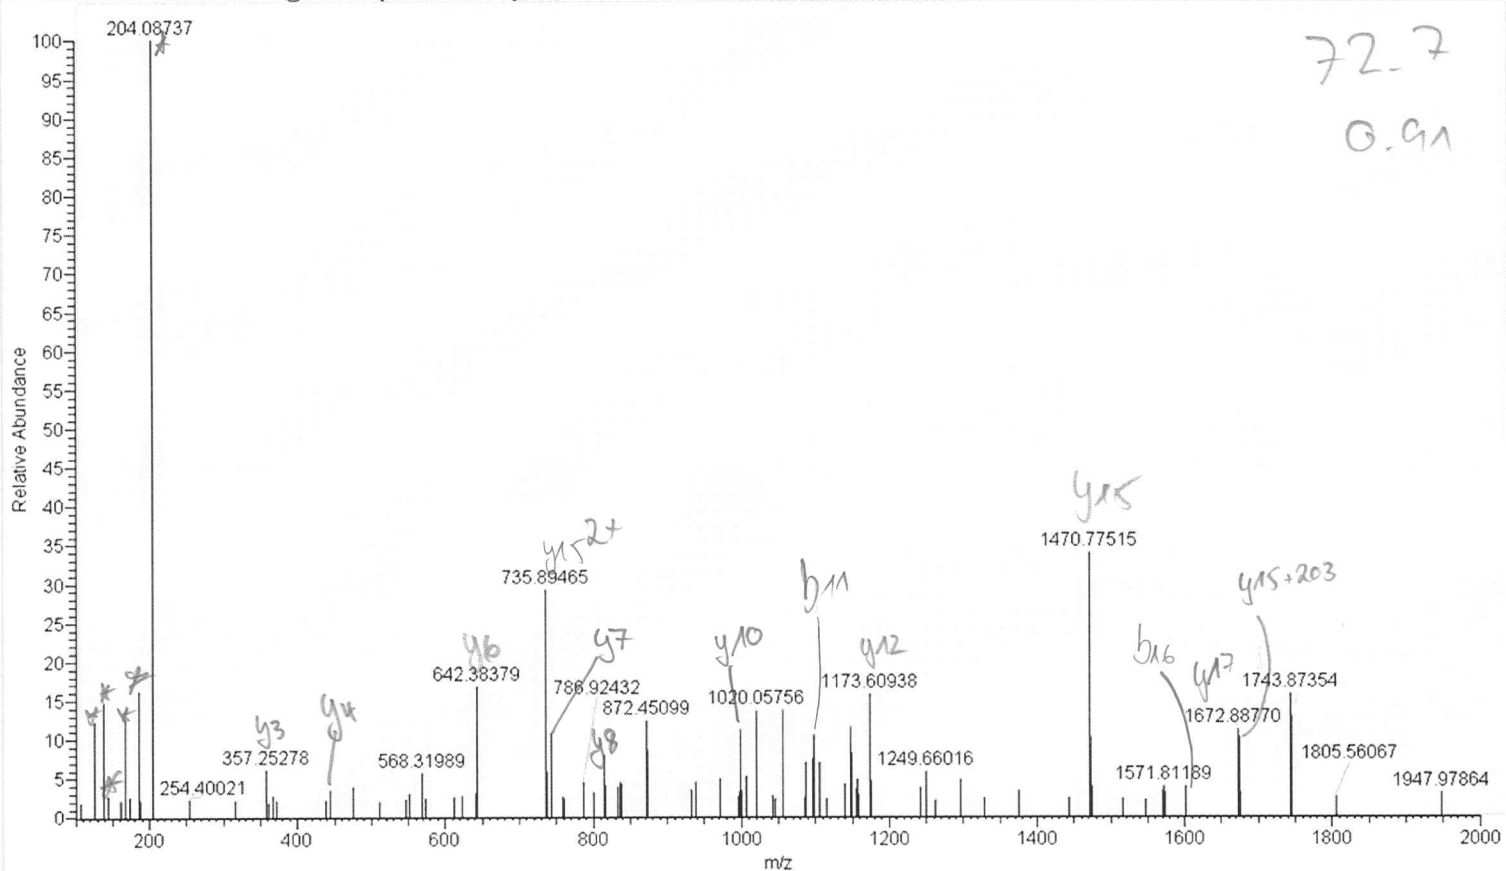

72.7  
0.91

Ready

CAP NUM SCRL

TKPLASVTNANTSSTQAAPVAVTTPTVSSGQATPTsPIK

b11 b12

y15

no site evidence

100

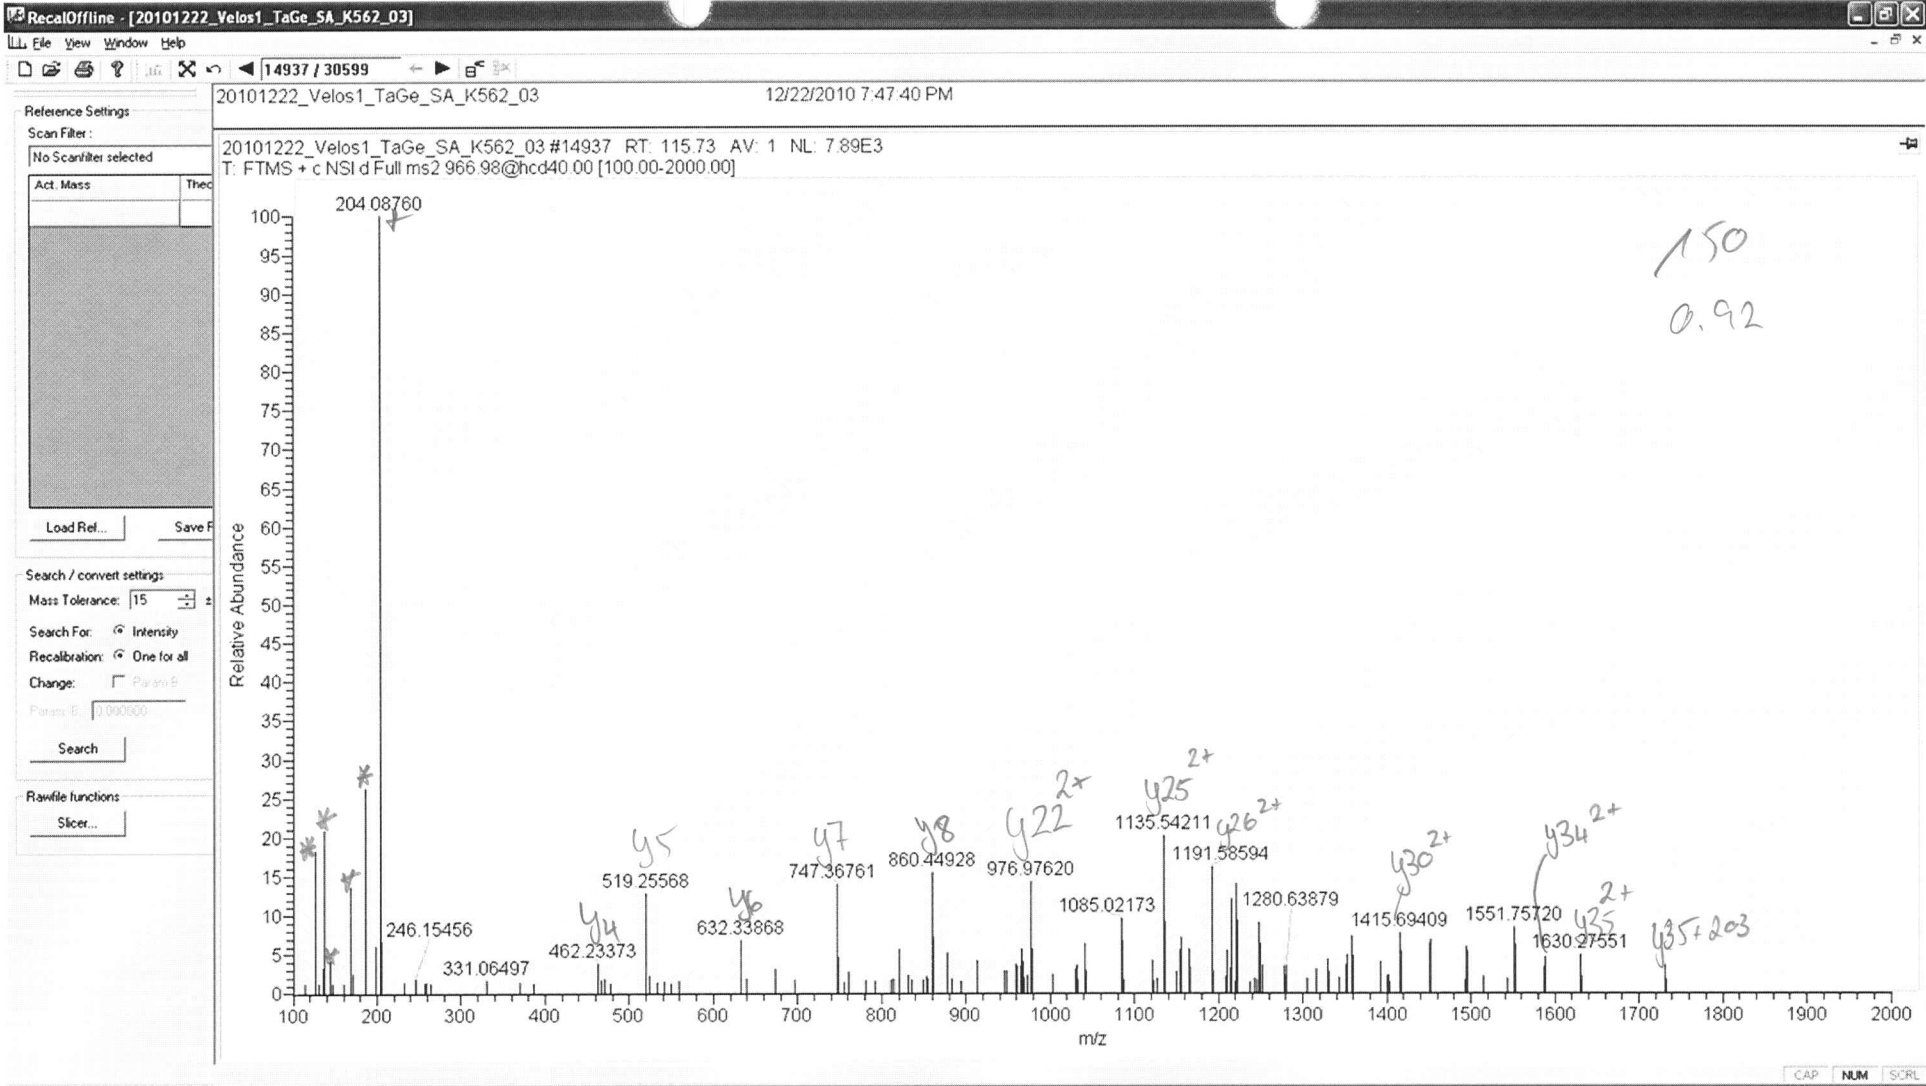

y35 y34

VVTTTANSANGYILTSQGAAGGSHDAAGAAVLDLGS<sub>S</sub>EAR

S5

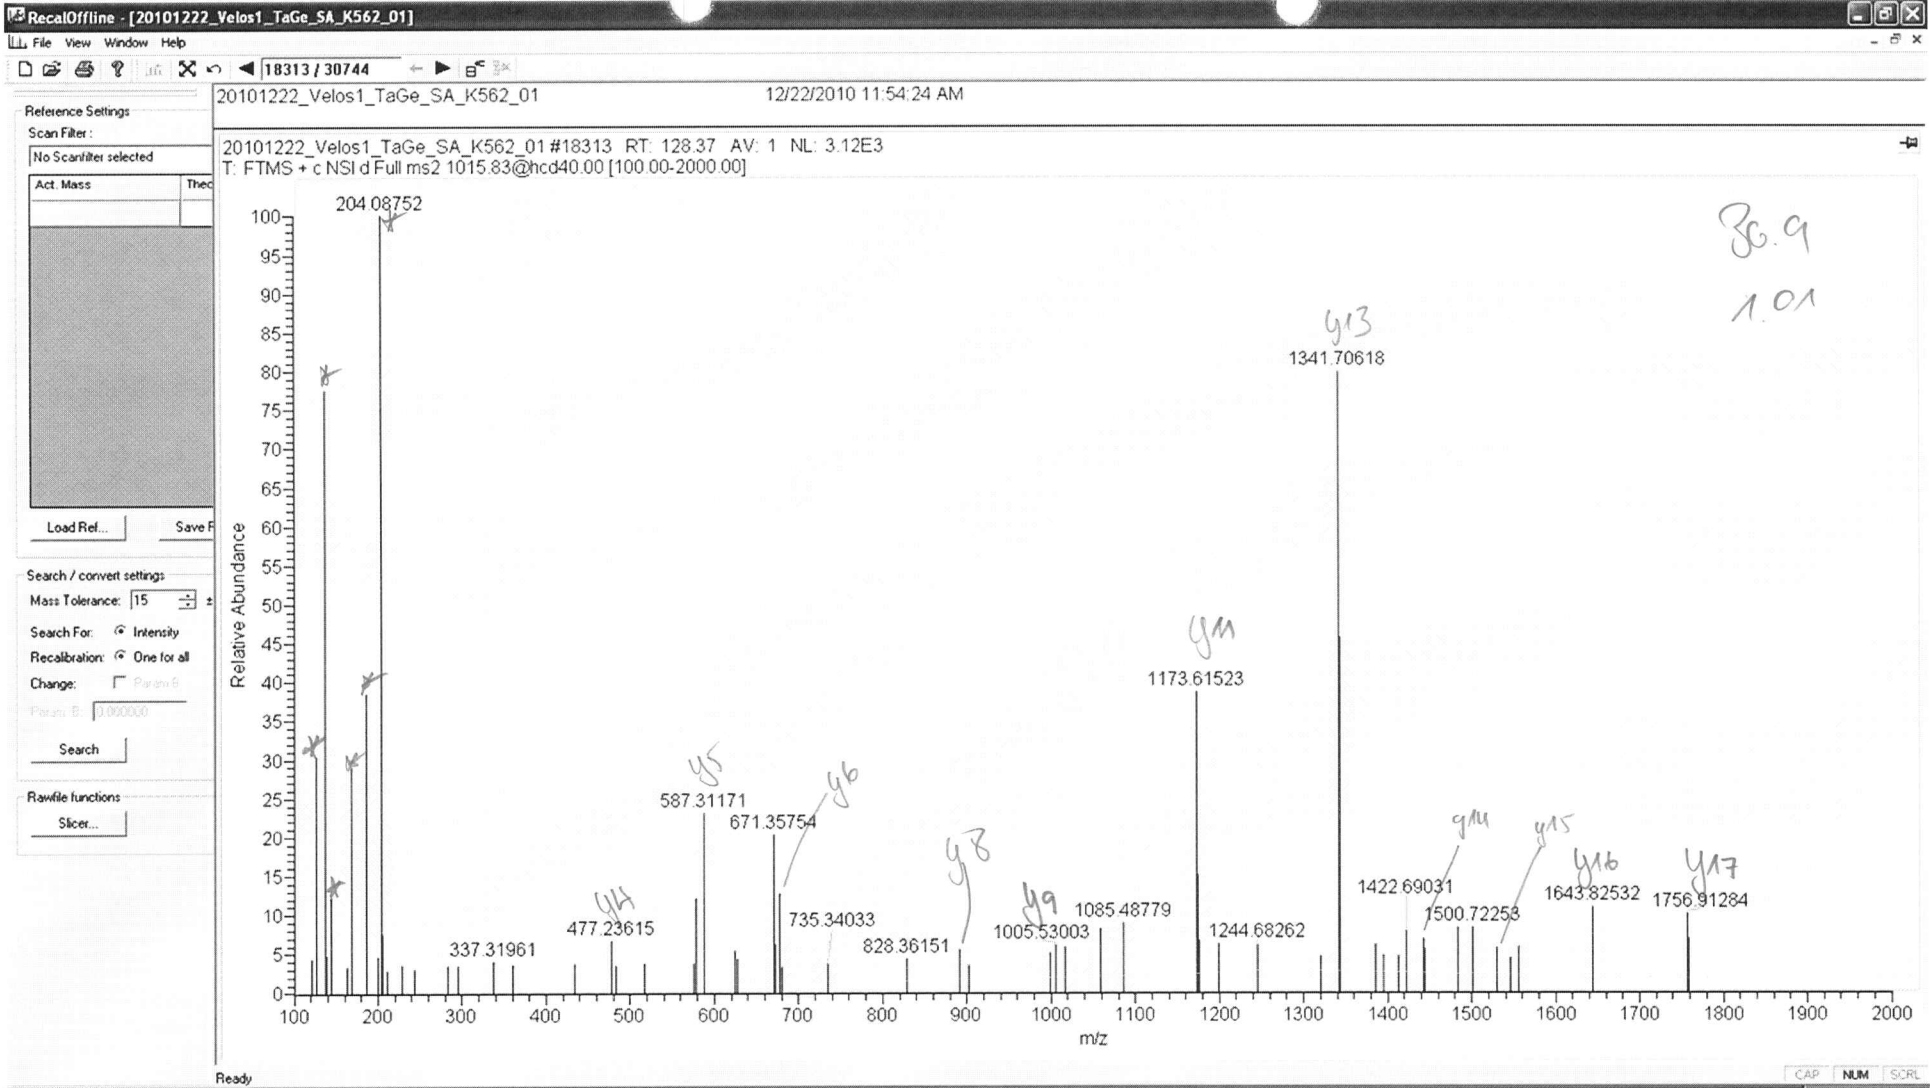

SSSAGFSFGTGVINSTPAPANTIVTSEnK

no site evidence



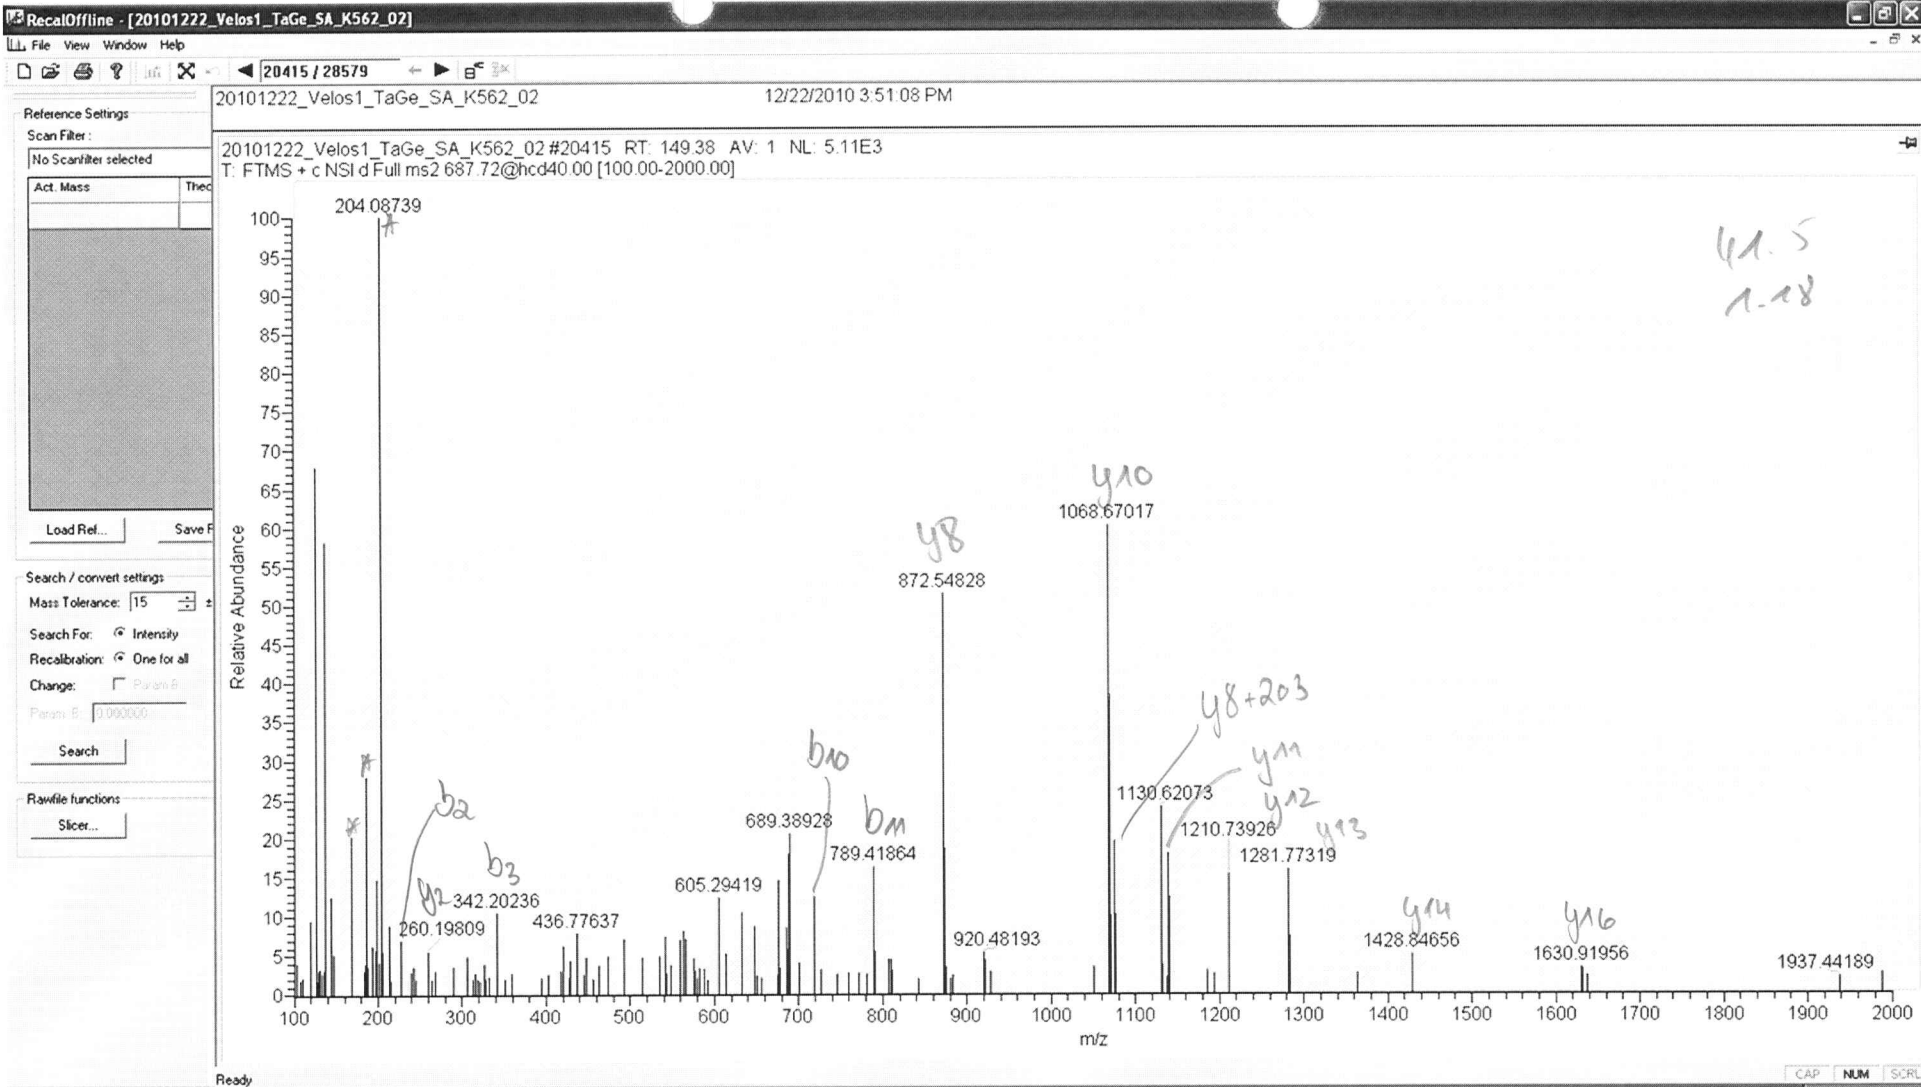

ILDSFAAAPVPTTtLVLK

y8

T12, 13 or 14







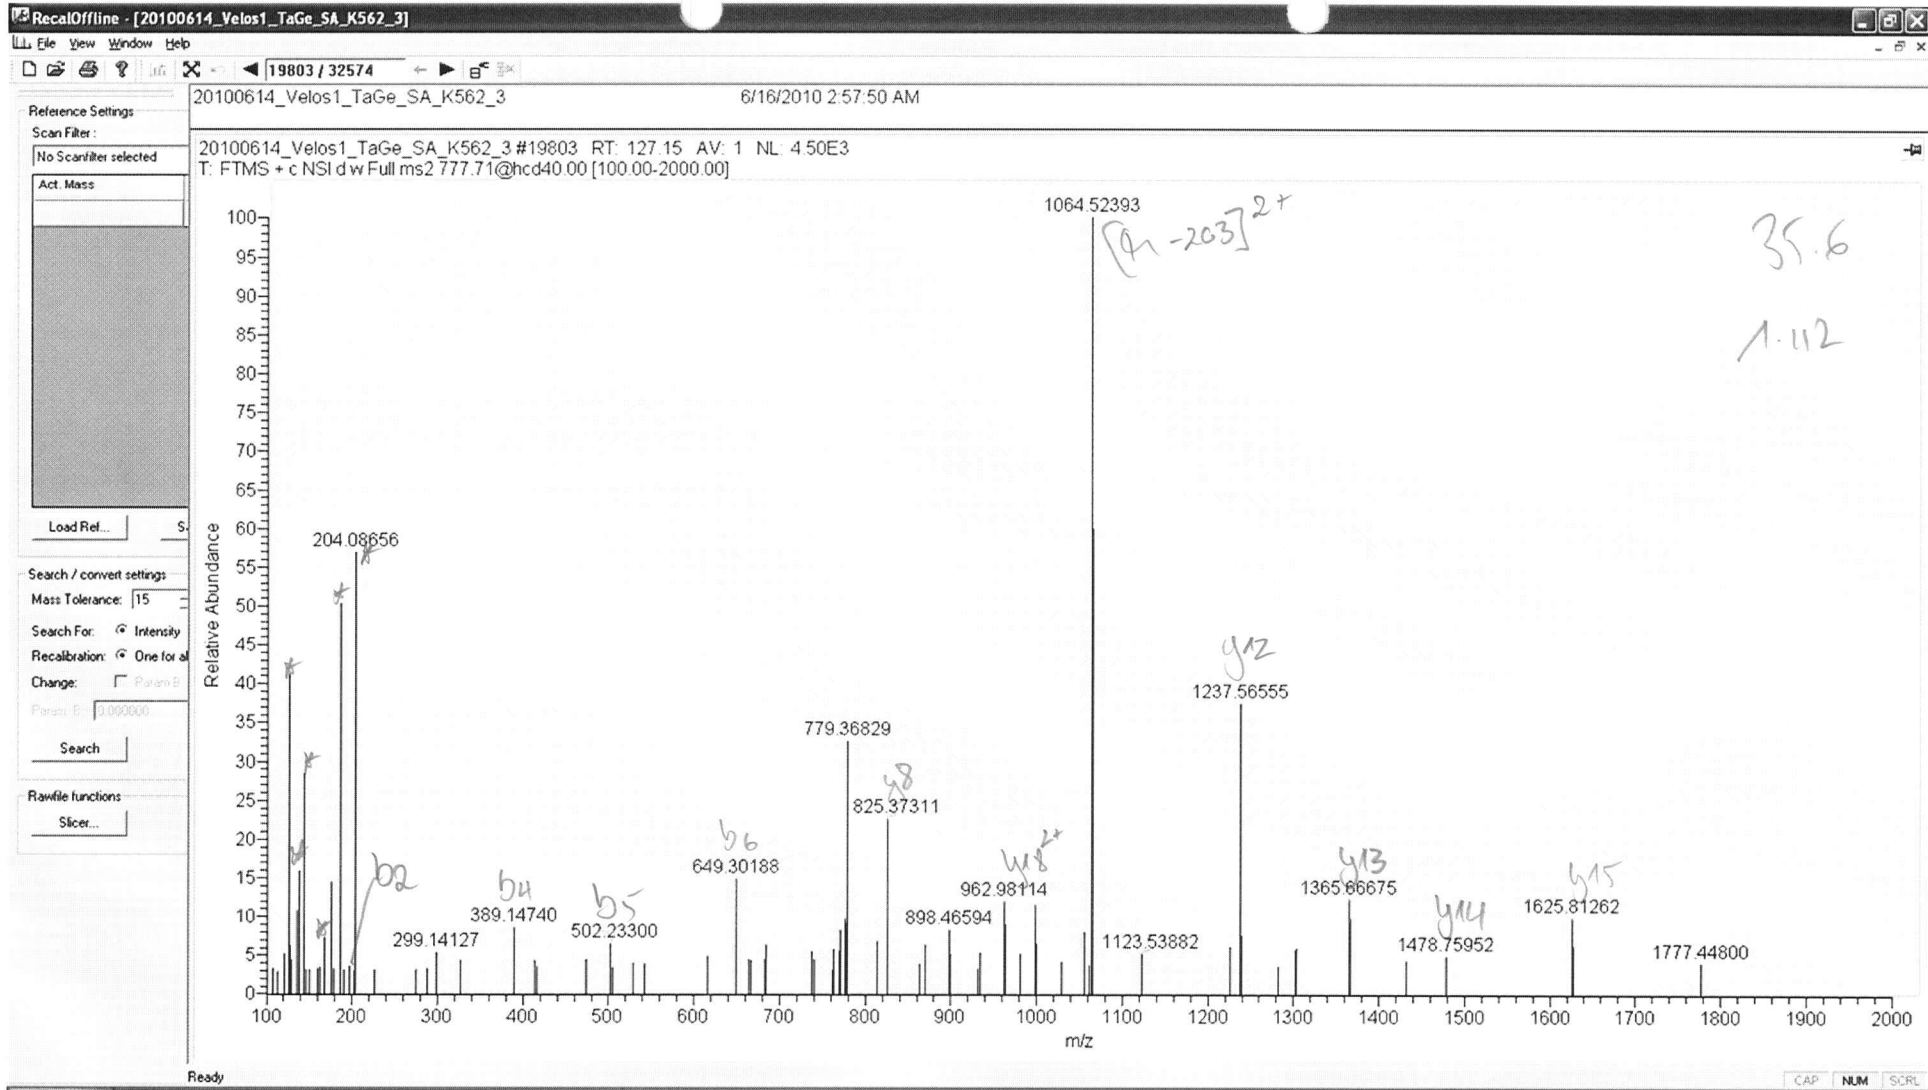

AMEGIFIKPSVEPsAGHDEL

no bite evidence

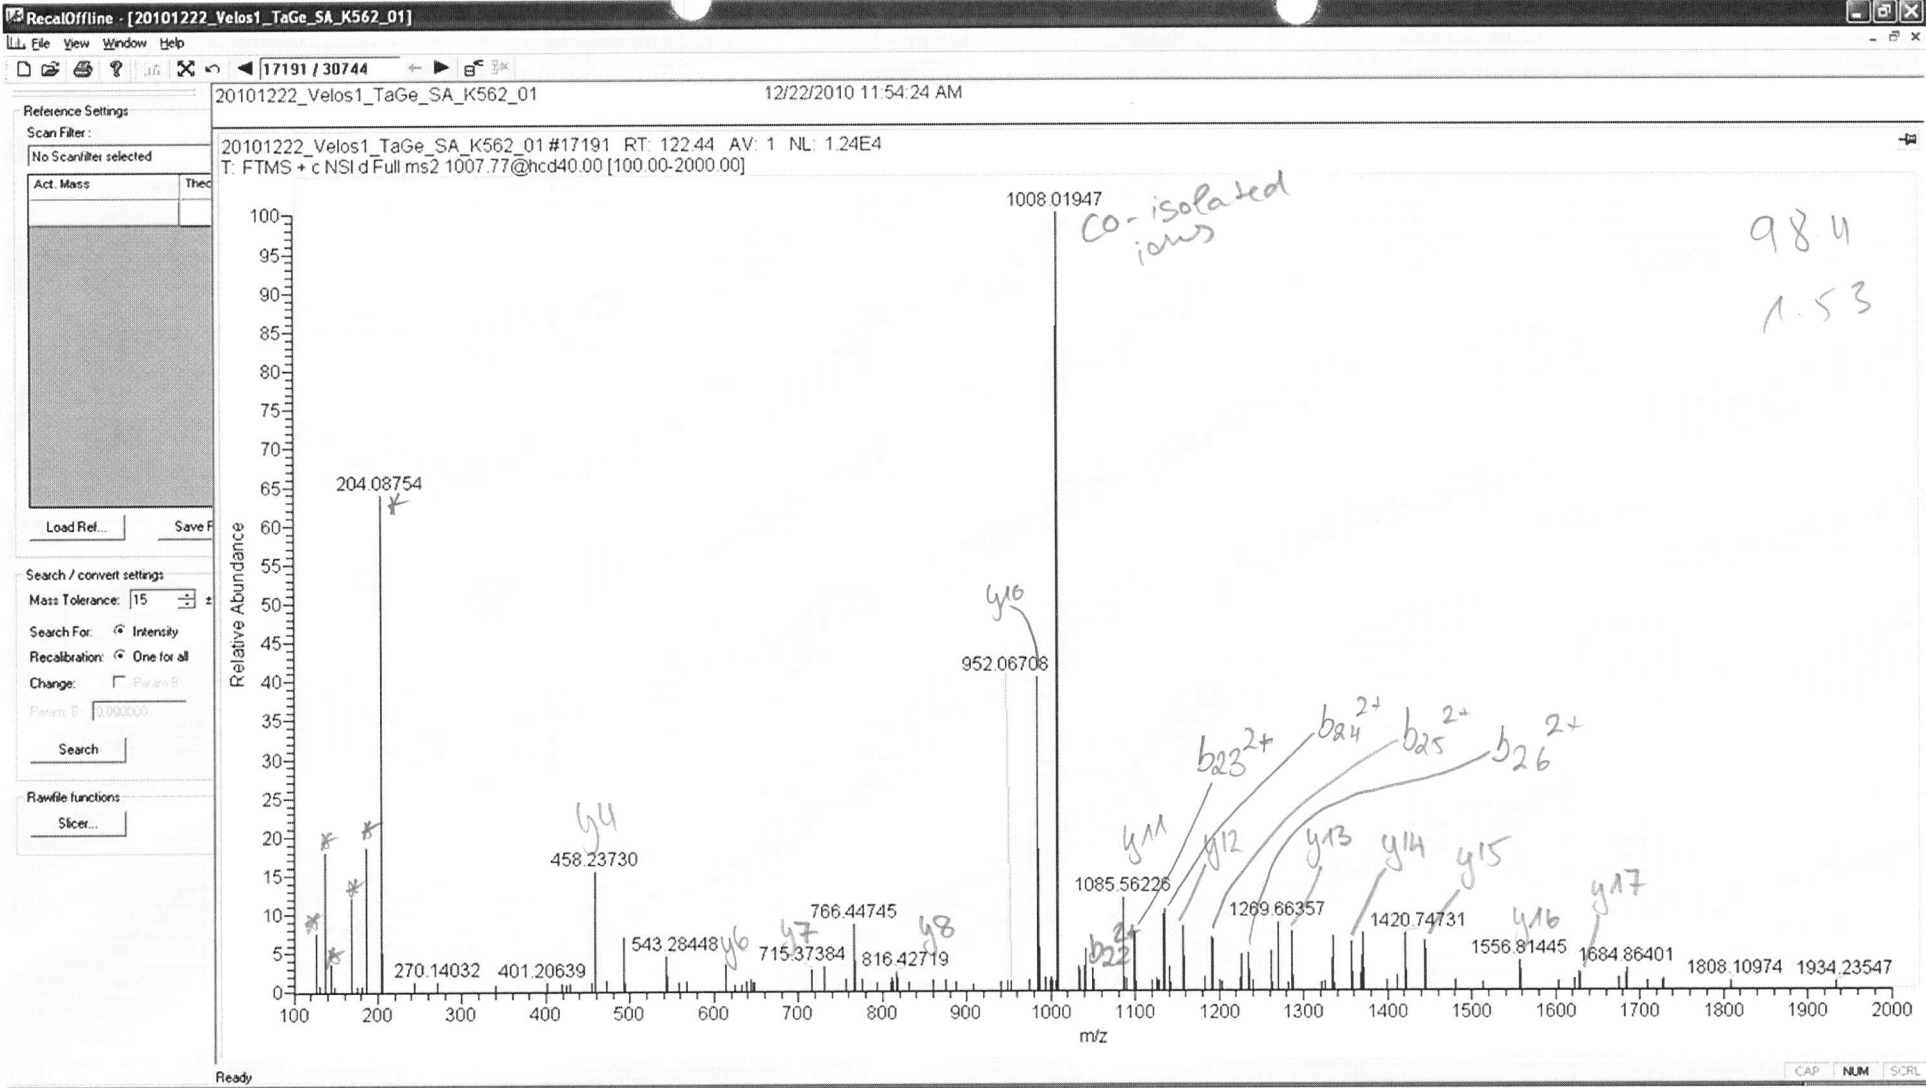

KEPVLAQPAVNSGTAASSTSLVALSAEATPATt<sup>y4</sup>GVPDAR

no site evidence

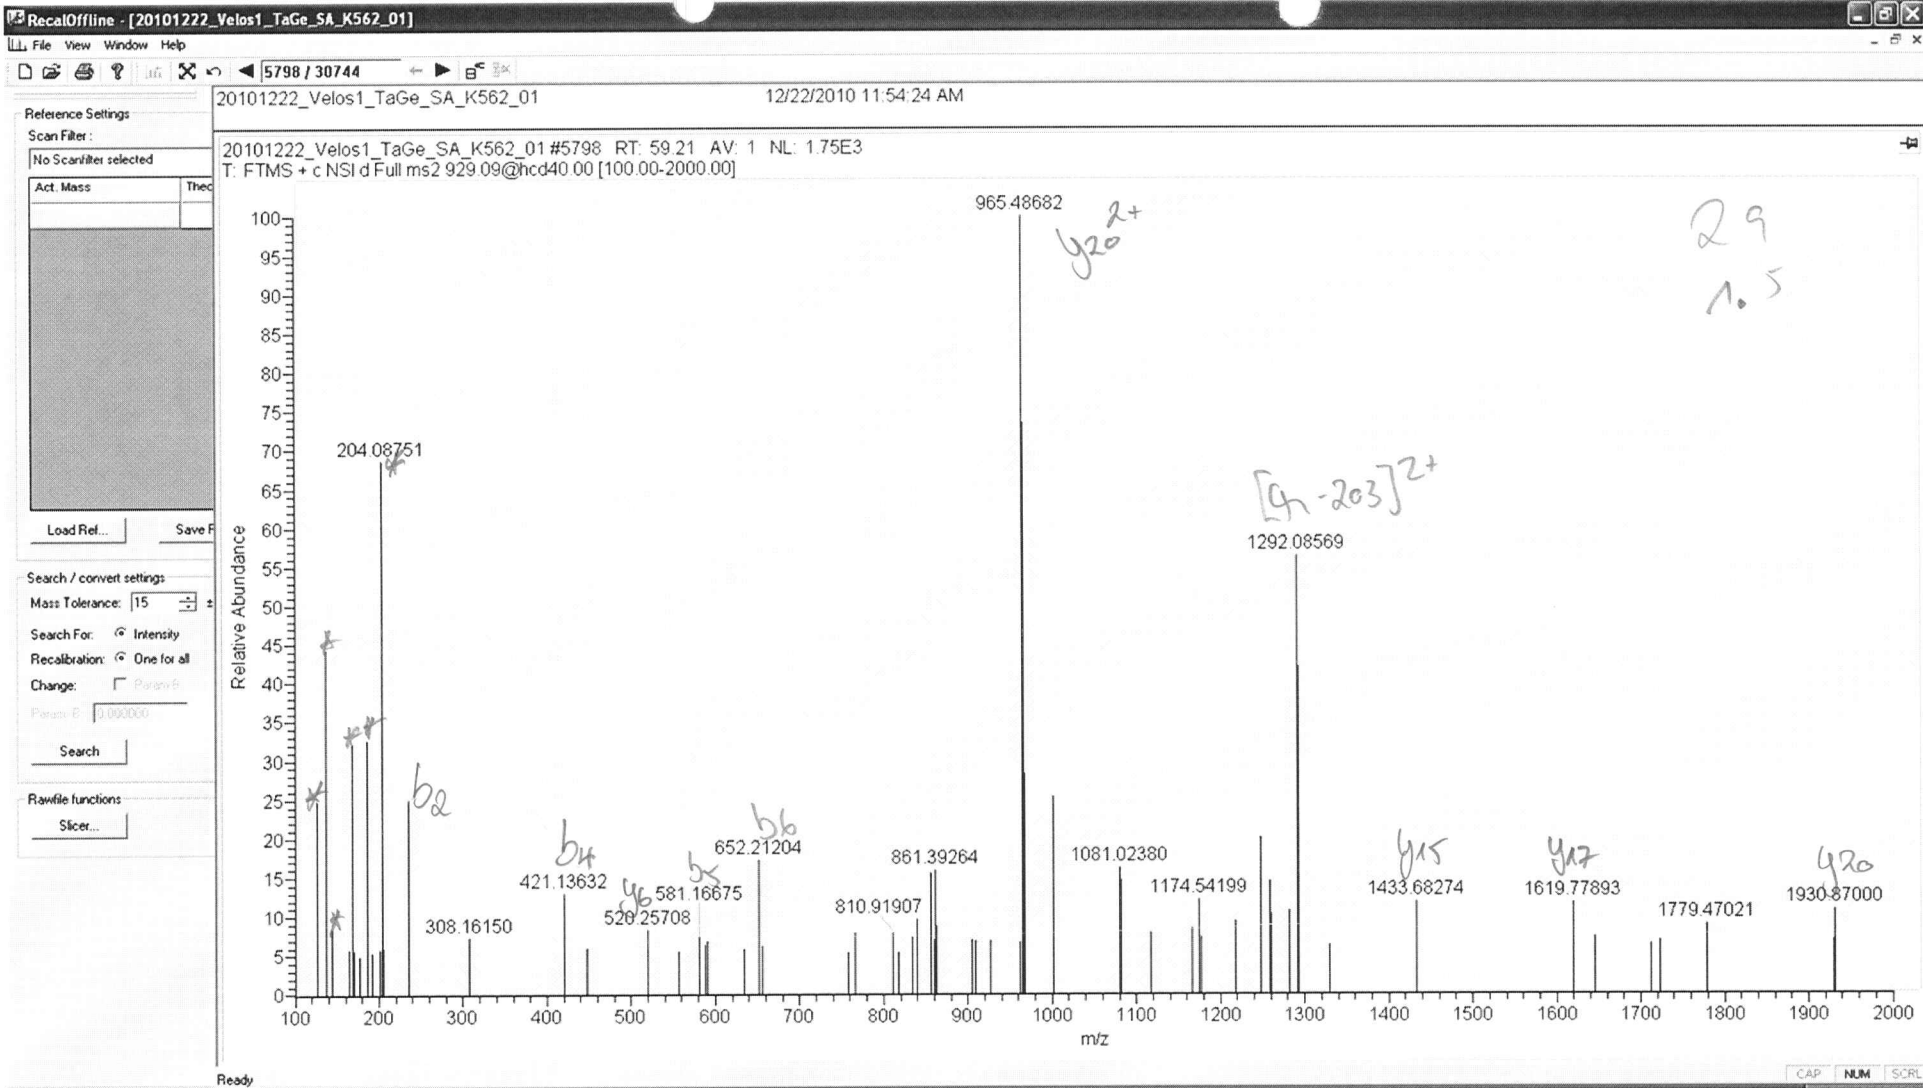

no site  
evidence

mSGEcAPNVSVSVSTSHTTISGGGsr

20091217\_Velos1\_NaNa\_SA\_10k\_run2\_Hela\_GluC\_SecA\_ph11 #23374 RT: 98.25 AV: 1 NL: 2.16E5  
T: FTMS + p ESI d Full ms2 853.42@hcd40.00 [100.00-1720.00]

Reference Settings

Scan Filter:  
No Scanfilter selected

| Act. Mass | Thec |
|-----------|------|
|           |      |

Load Ref... Save F...

Search / convert settings

Mass Tolerance: 15

Search For:  Intensity

Recalibration:  One for all

Change:  Param 9

Param 9: 0.000000

Search

Rawfile functions

Slicer...

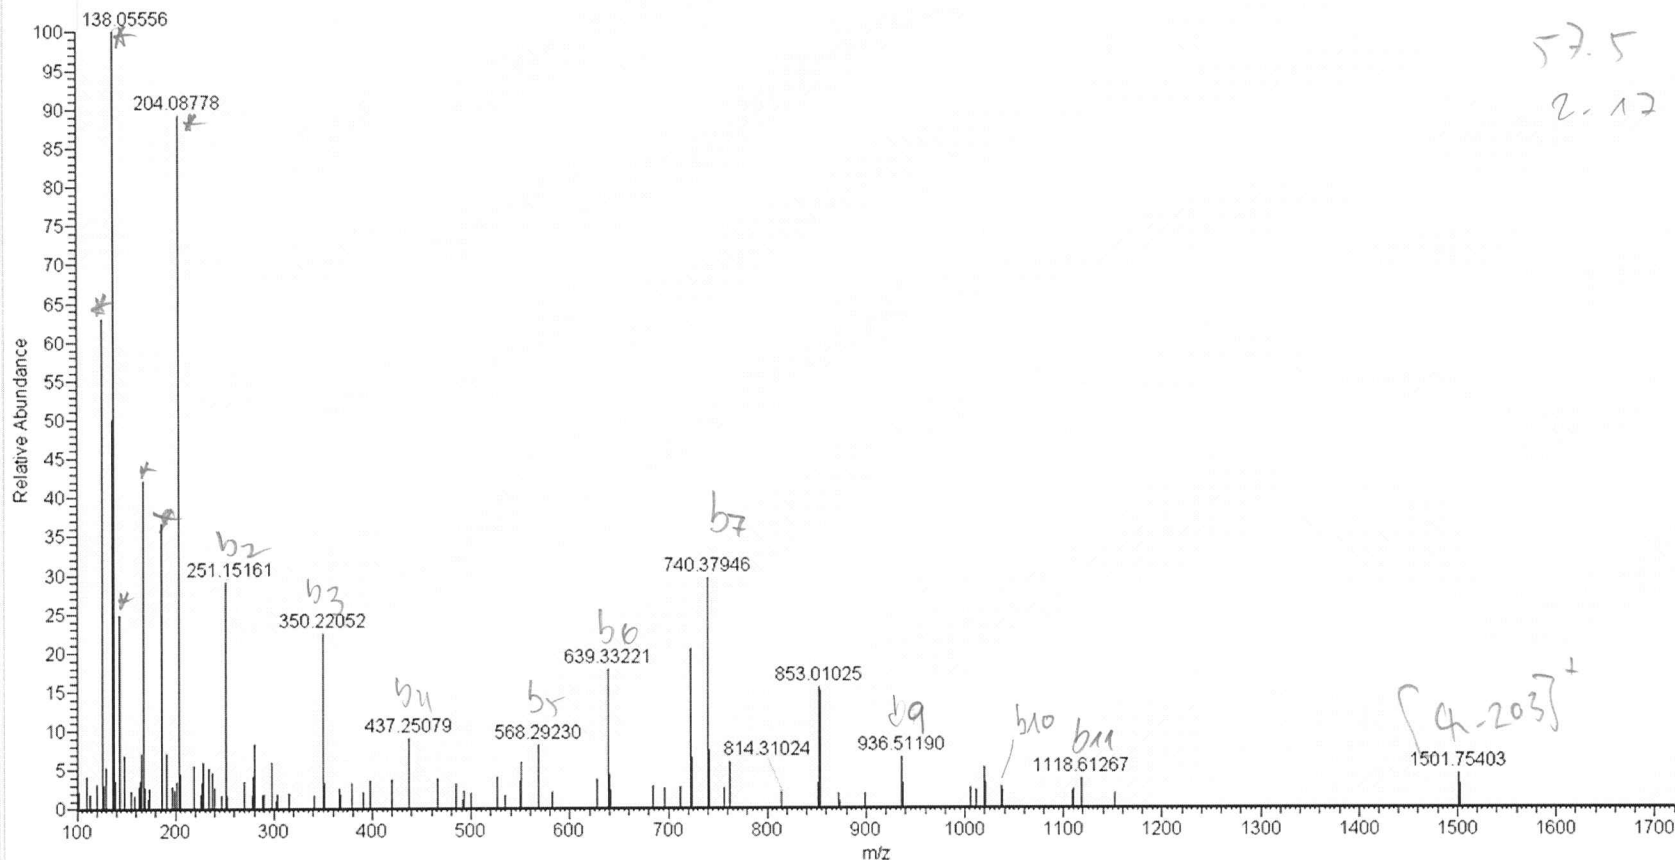

no fork evidence

IHVSMATPVtVSME

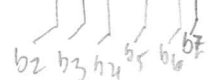

no

Reference Settings

Scan Filter:  
No Scanfilter selected

| Act. Mass | Theo |
|-----------|------|
|           |      |

Load Ref... Save F...

20091225\_Velos1\_NaNa\_SA\_10k\_run2\_Hela\_GluC\_SecC\_pH11 #14166 RT: 58.67 AV: 1 NL: 230E5  
T: FTMS + p ESI d Full ms2 608.35@hcd40.00 [100.00-1230.00]

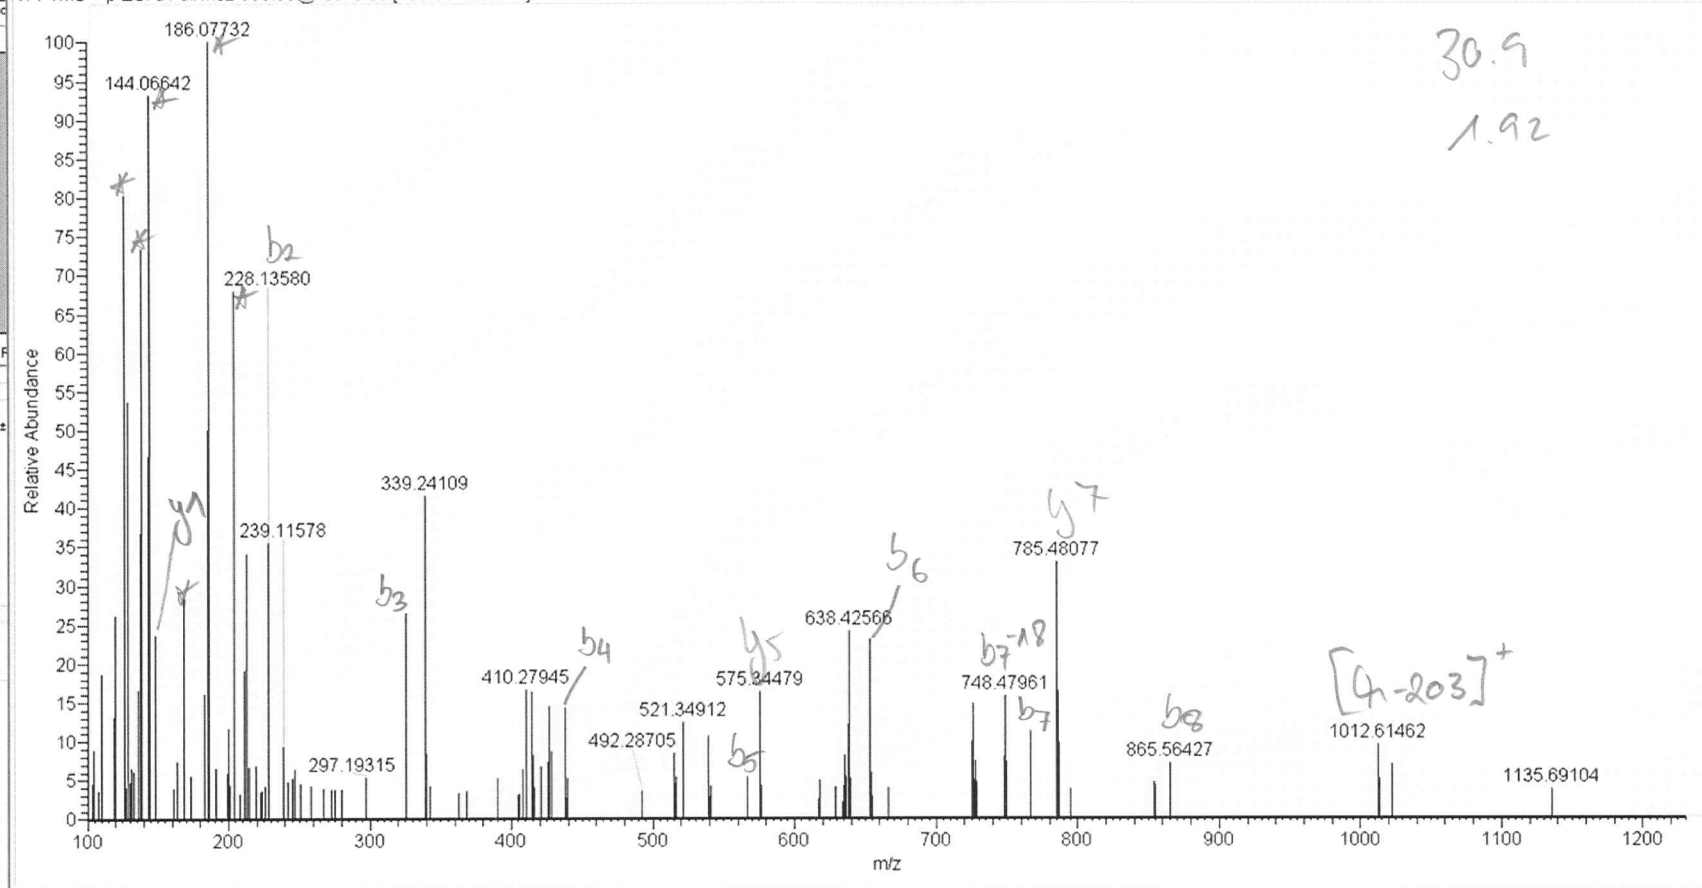

Search / convert settings

Mass Tolerance: 15 ±

Search For:  Intensity

Recalibration:  One for all

Change:  Param 9

Param 9: 0.000000

Search

Rawfile functions

Slicer...

y7 y5  
LNPLKsIVE

No site evidence

M

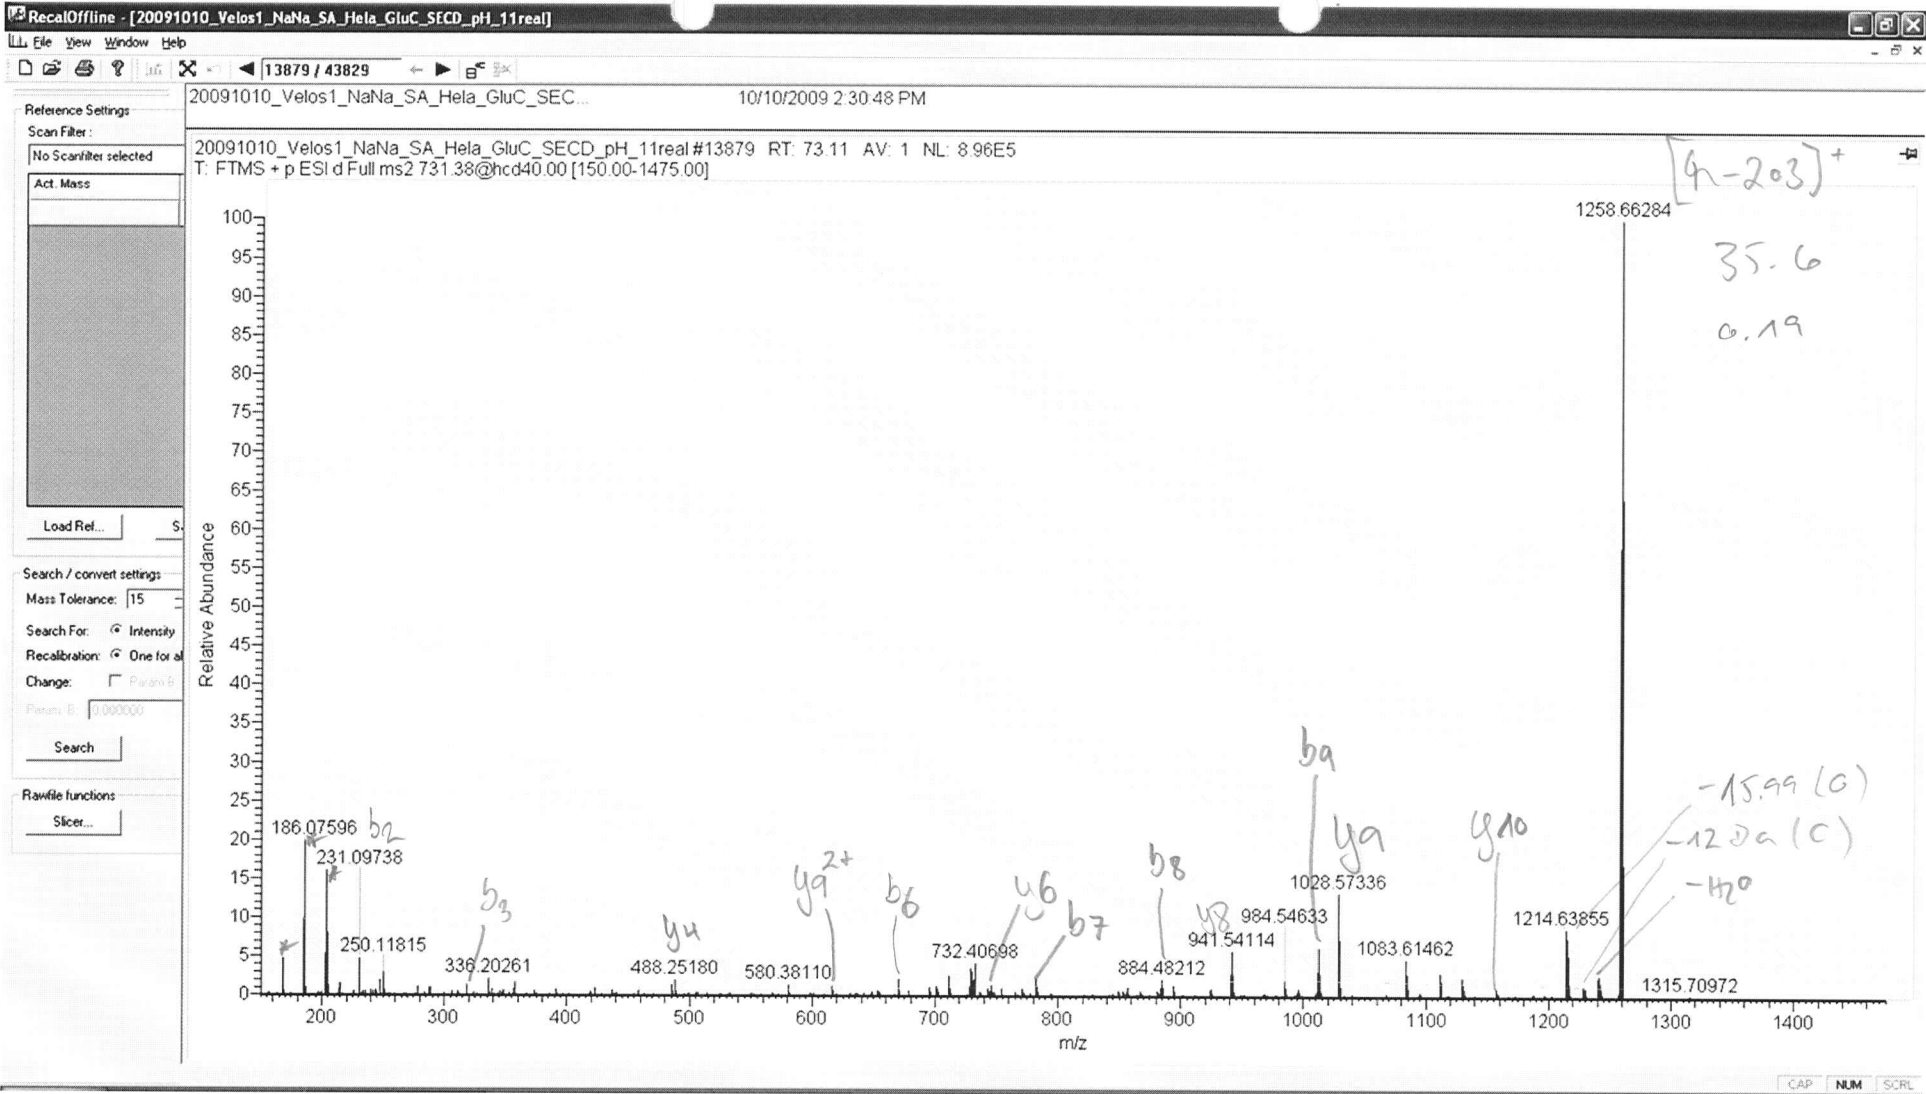

no site evidence

TESPVRtLQVE

M3

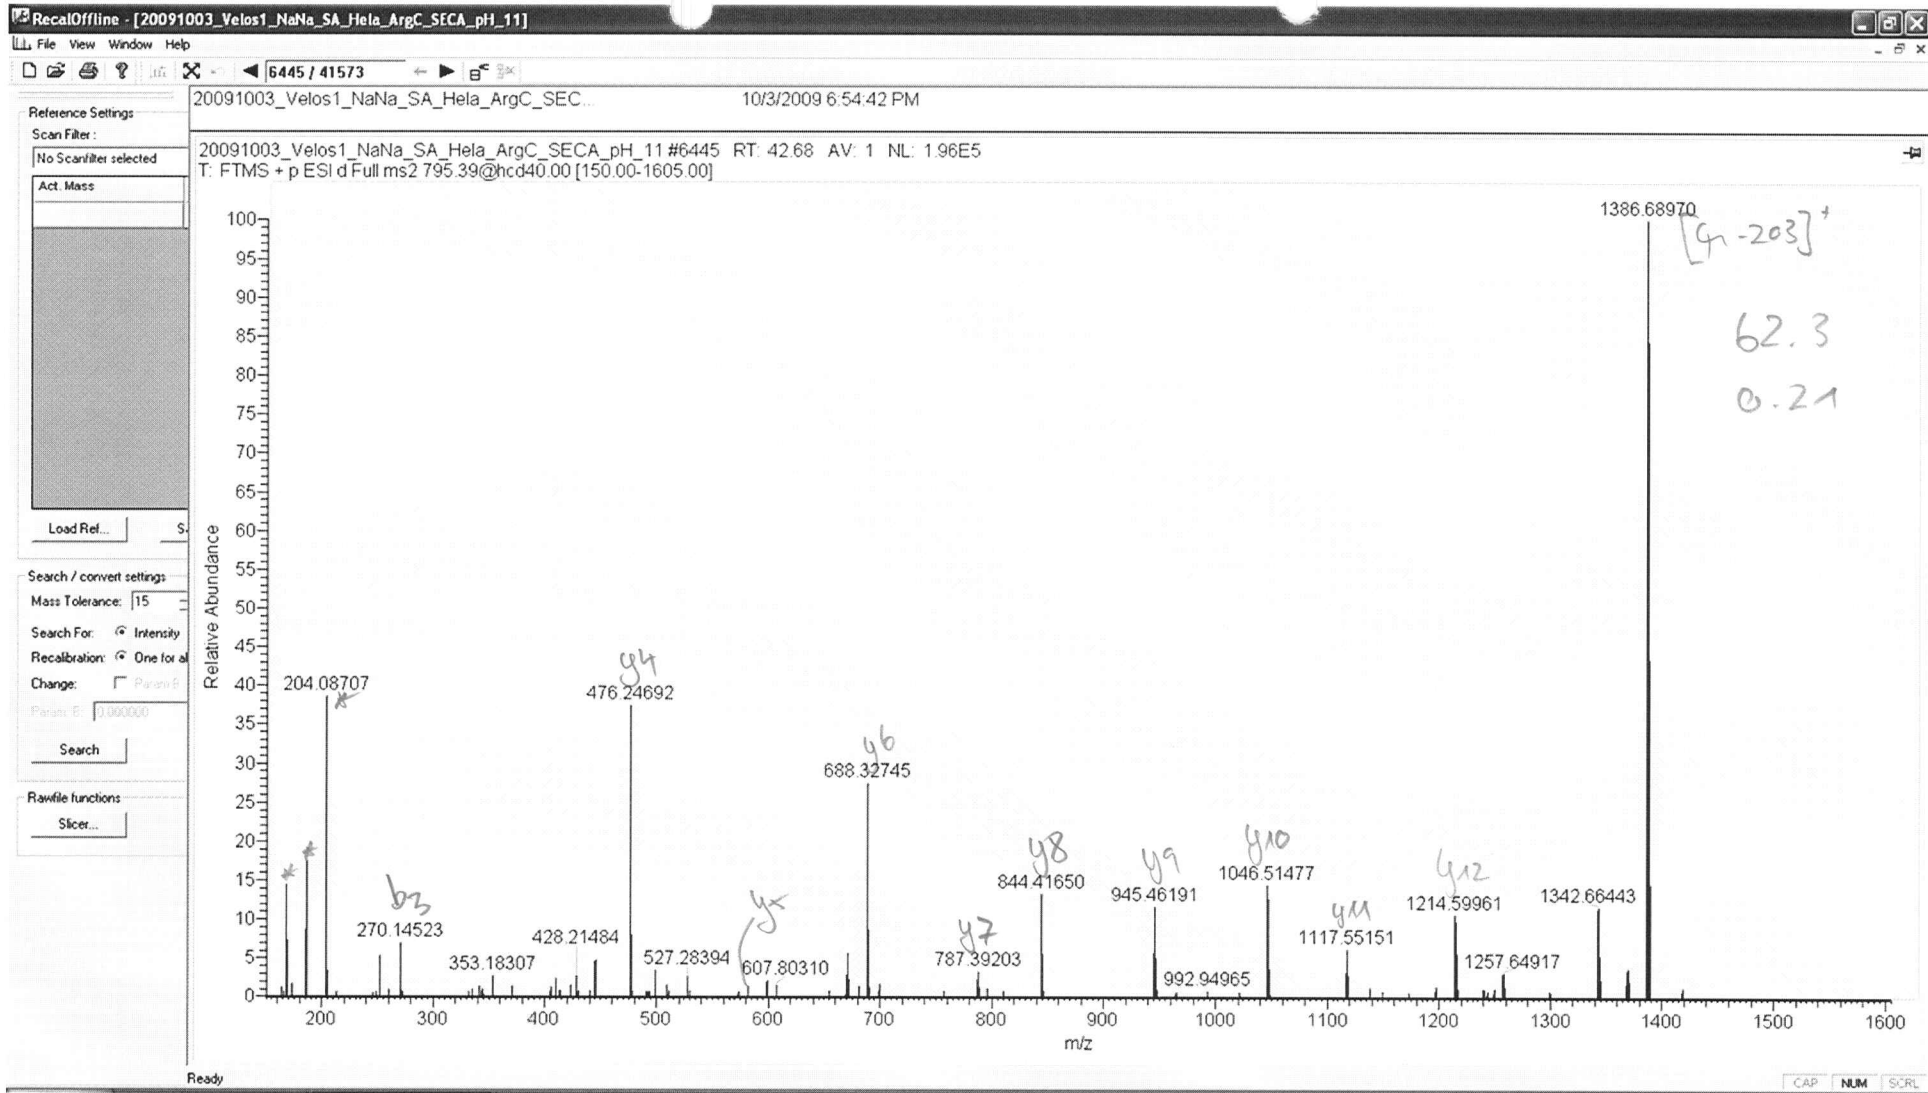

ATPATTGVDPARtE

no nit evidence

AMU





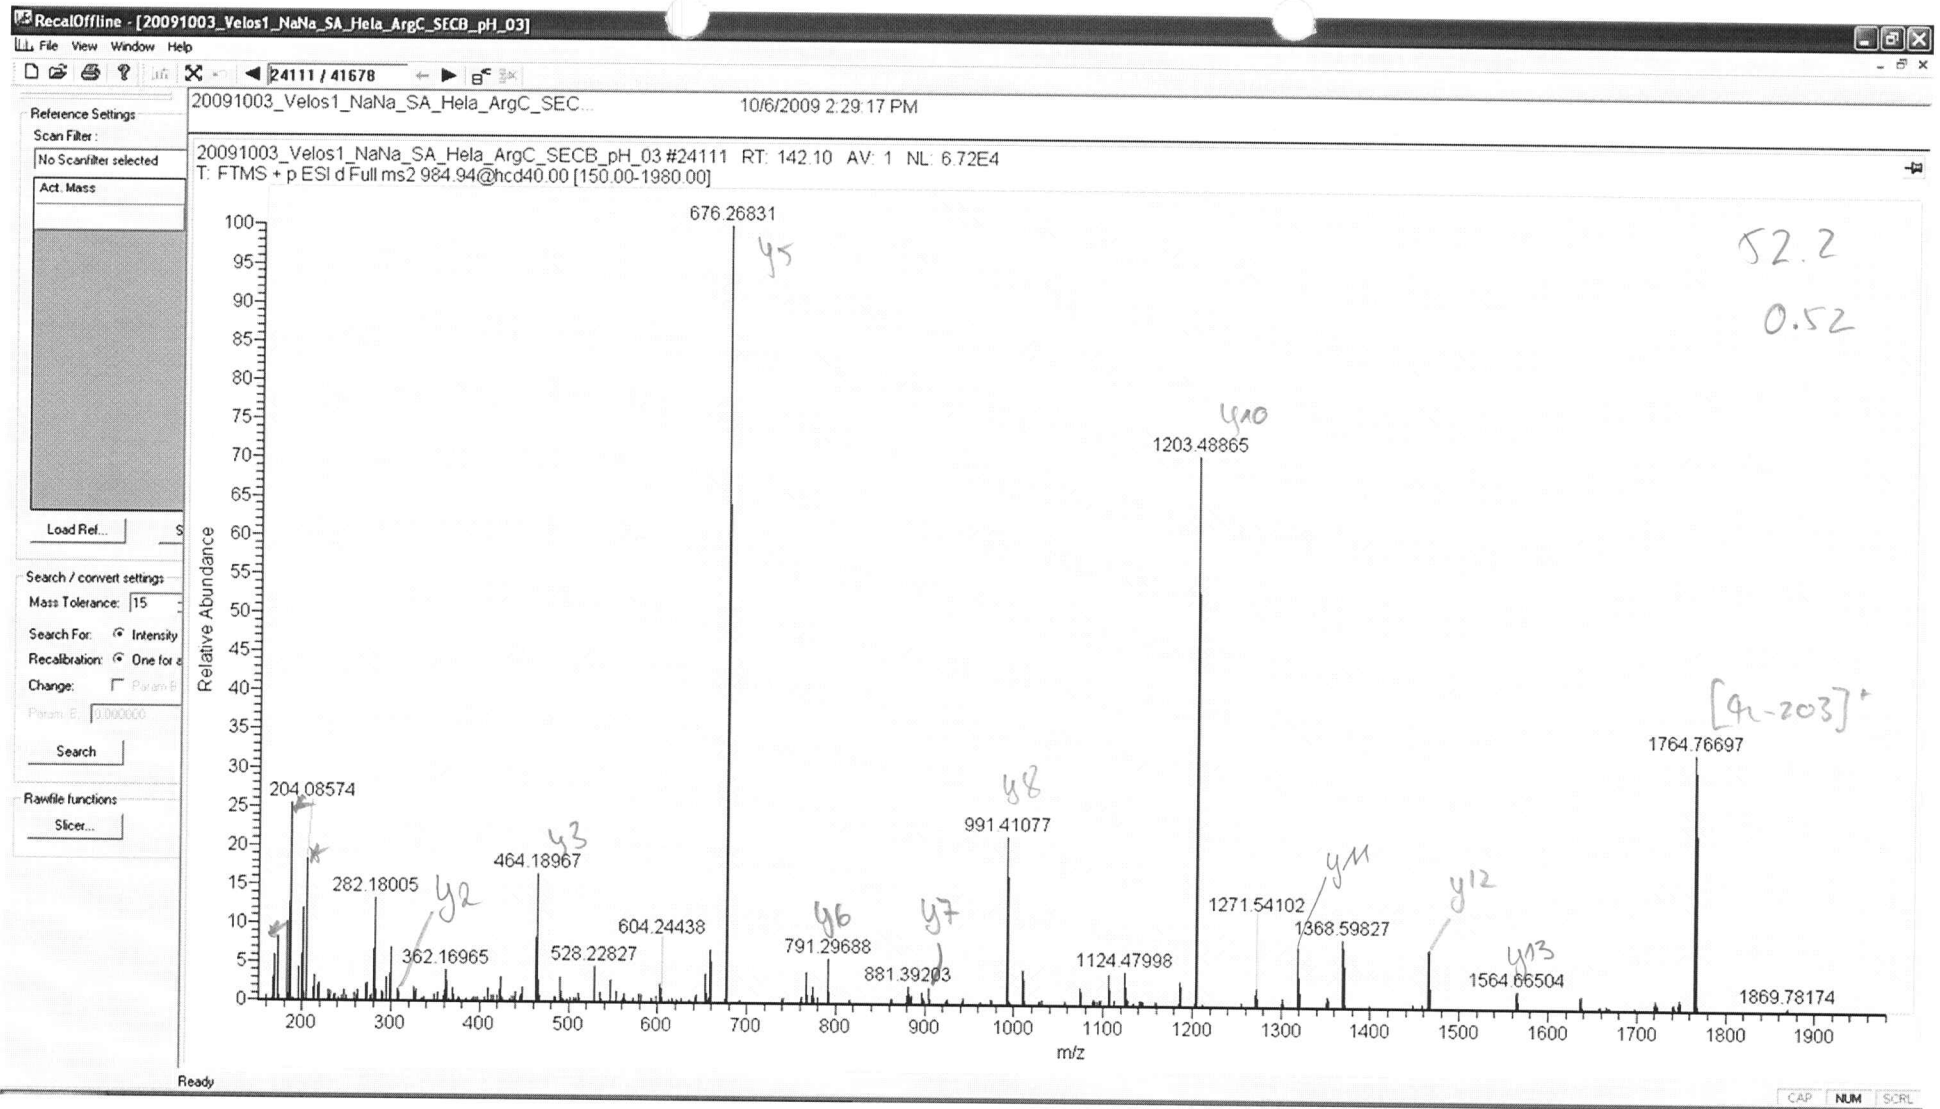

no site evidence

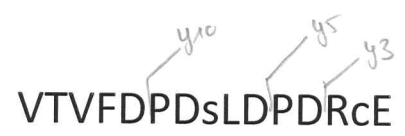

116

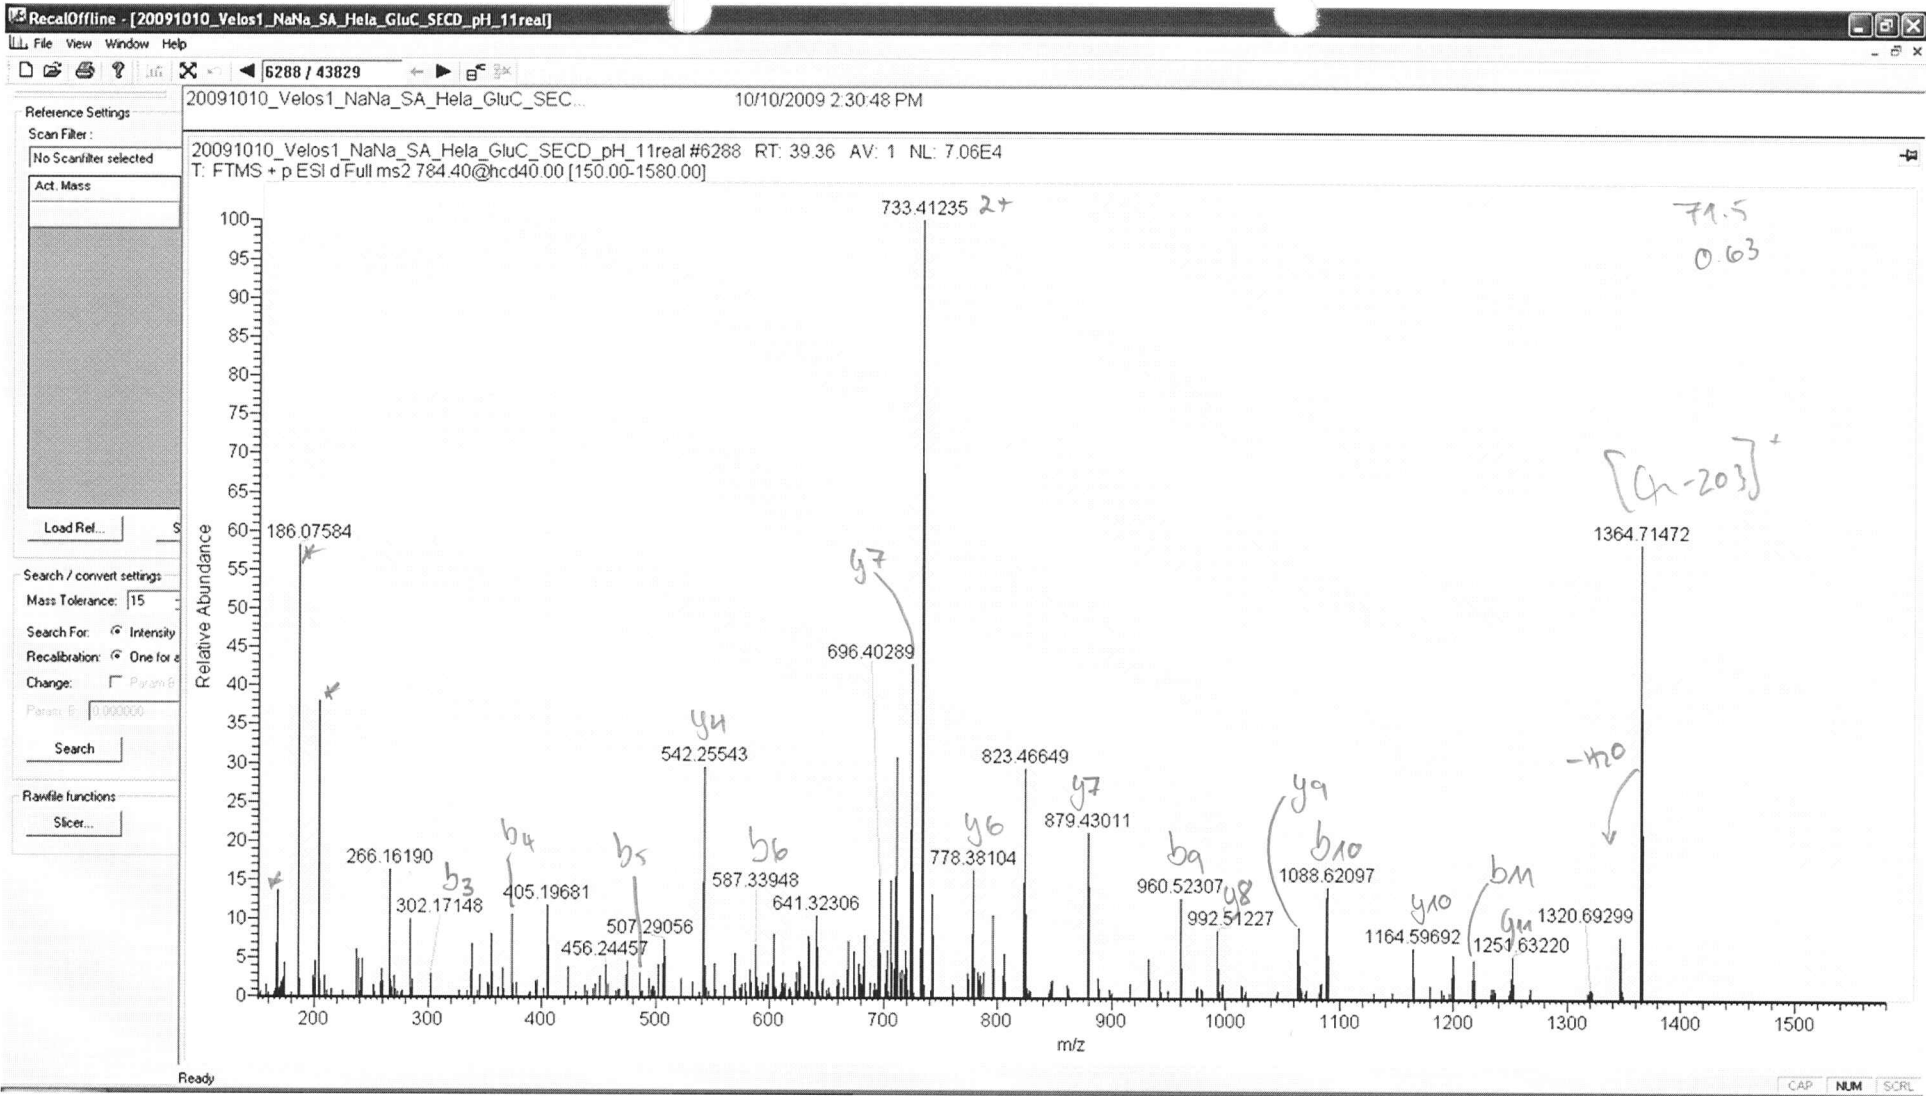

no site evidence

LSTAIHVHKEE

b<sub>9</sub>

117

Reference Settings

Scan Filter:  
No Scanfilter selected

Act. Mass

Load Ref...

Search / convert settings

Mass Tolerance: 15

Search For: Intensity

Recalibration: One for e

Change:  Pairwise

Param. E: 0.000000

Search

Rawfile functions

Slicer...

20091006\_Velos1\_NaNa\_SA\_Hela\_GluC\_SECD\_pH\_11real#7911 RT: 61.61 AV: 1 NL: 4.63E3  
T: FTMS + p ESI d Full ms2 781.41@hcd40.00 [150.00-1575.00]

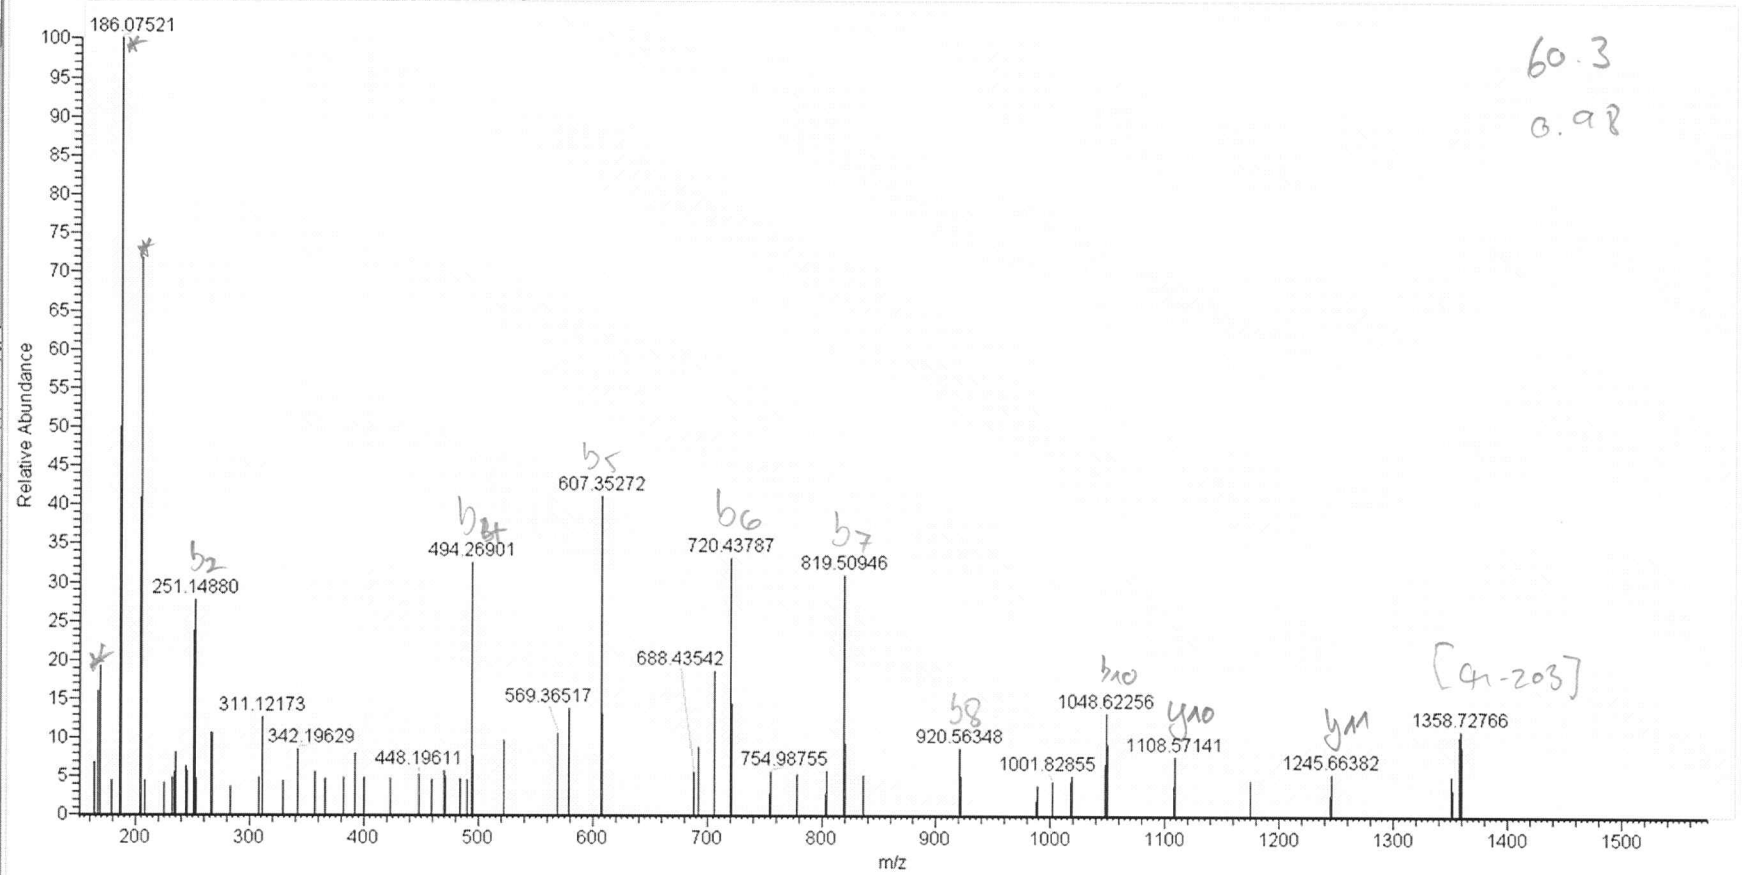

Ready

CAP NUM SCRL

IHKDLLVtGAYE  
 y11  
 b10

T8

119

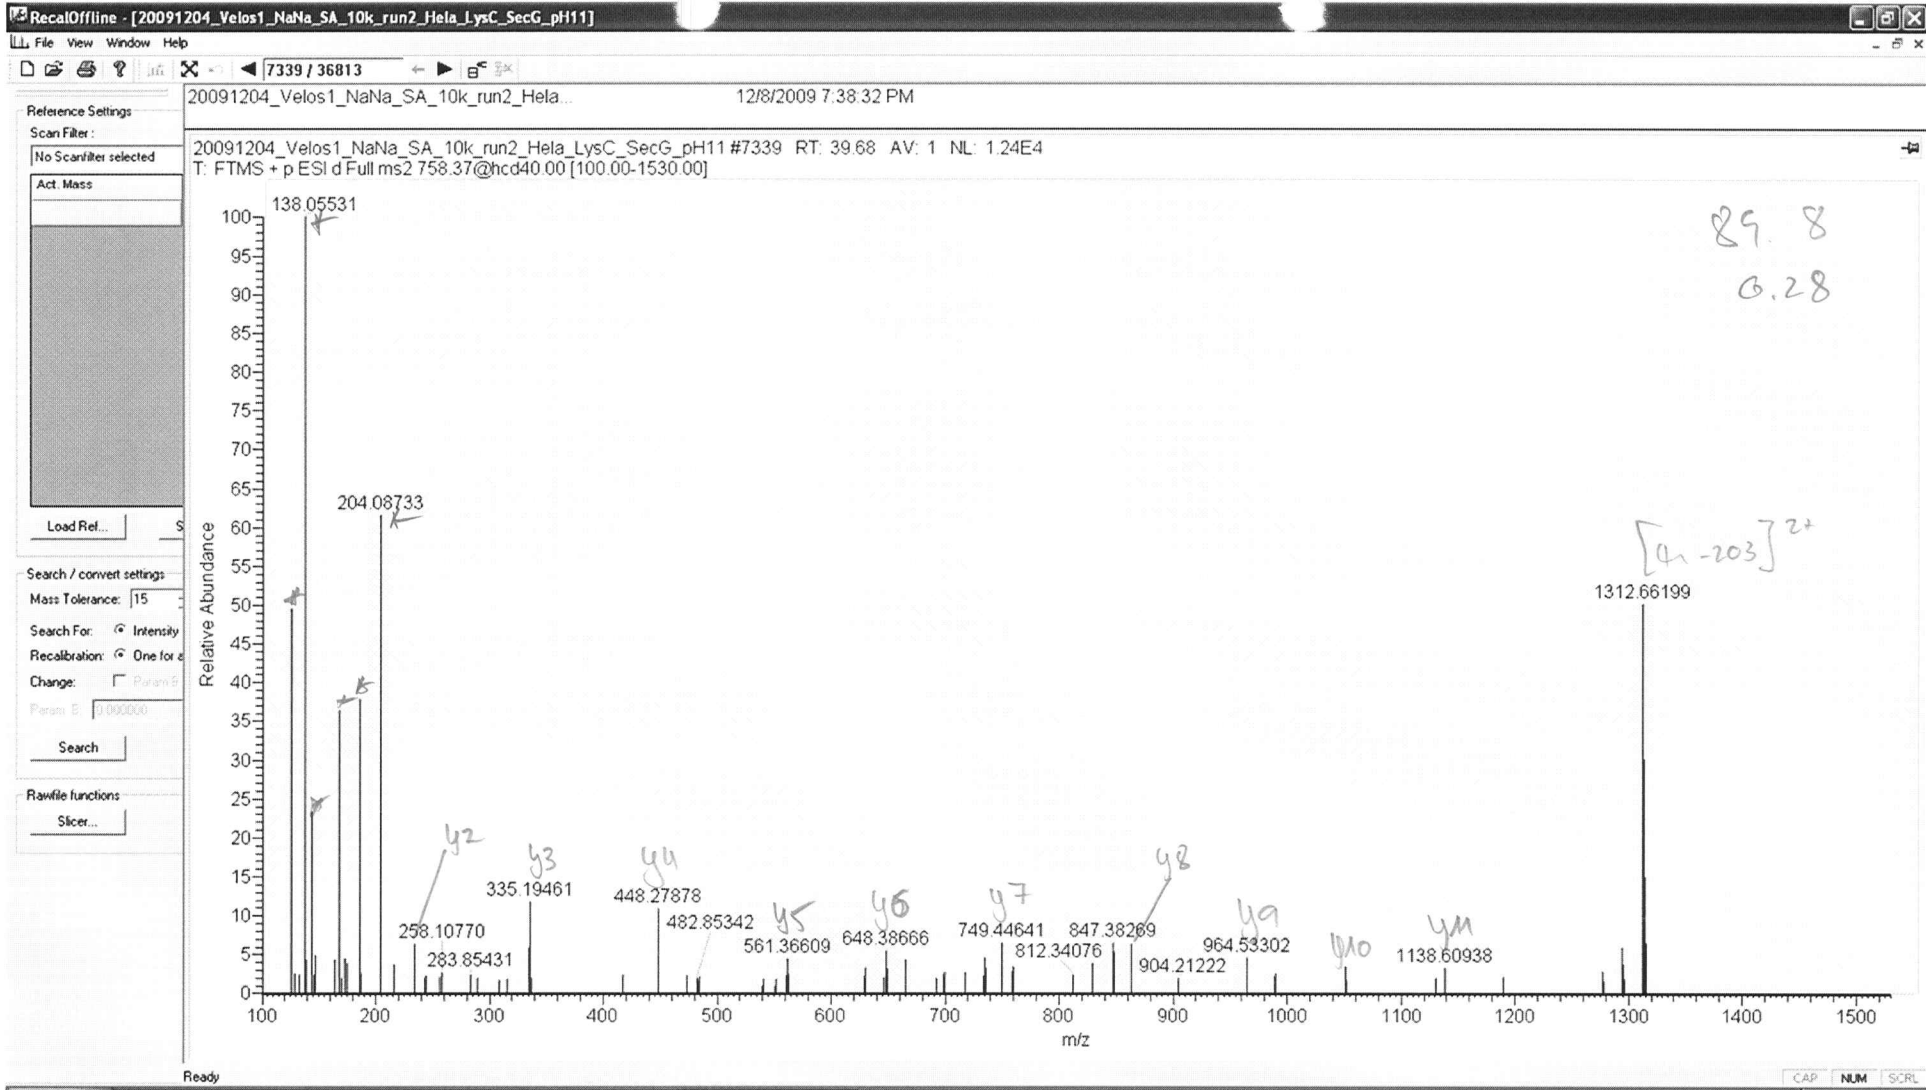

no site evidence

SSSSTNTSLLT<sup>4A</sup>sK

120

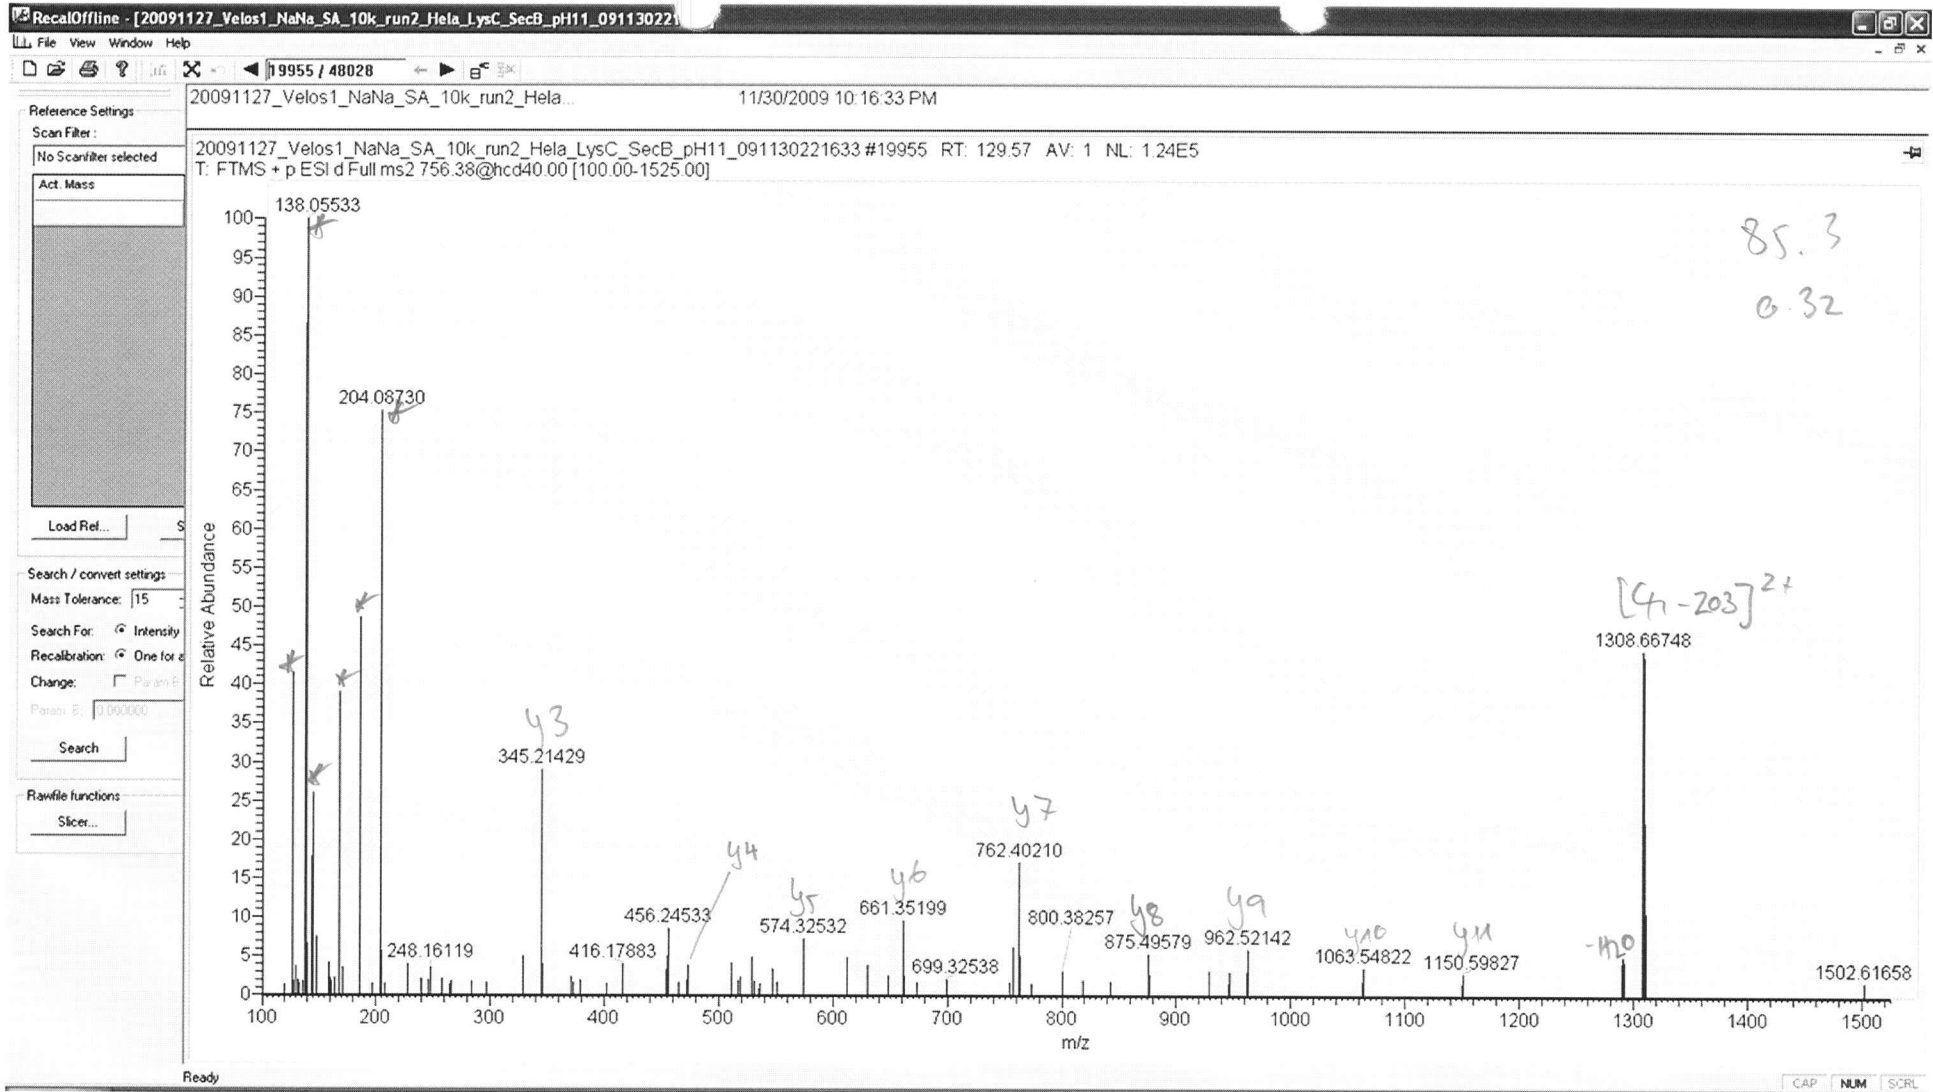

no site evidence

AsSTSLTSTQPTK

21

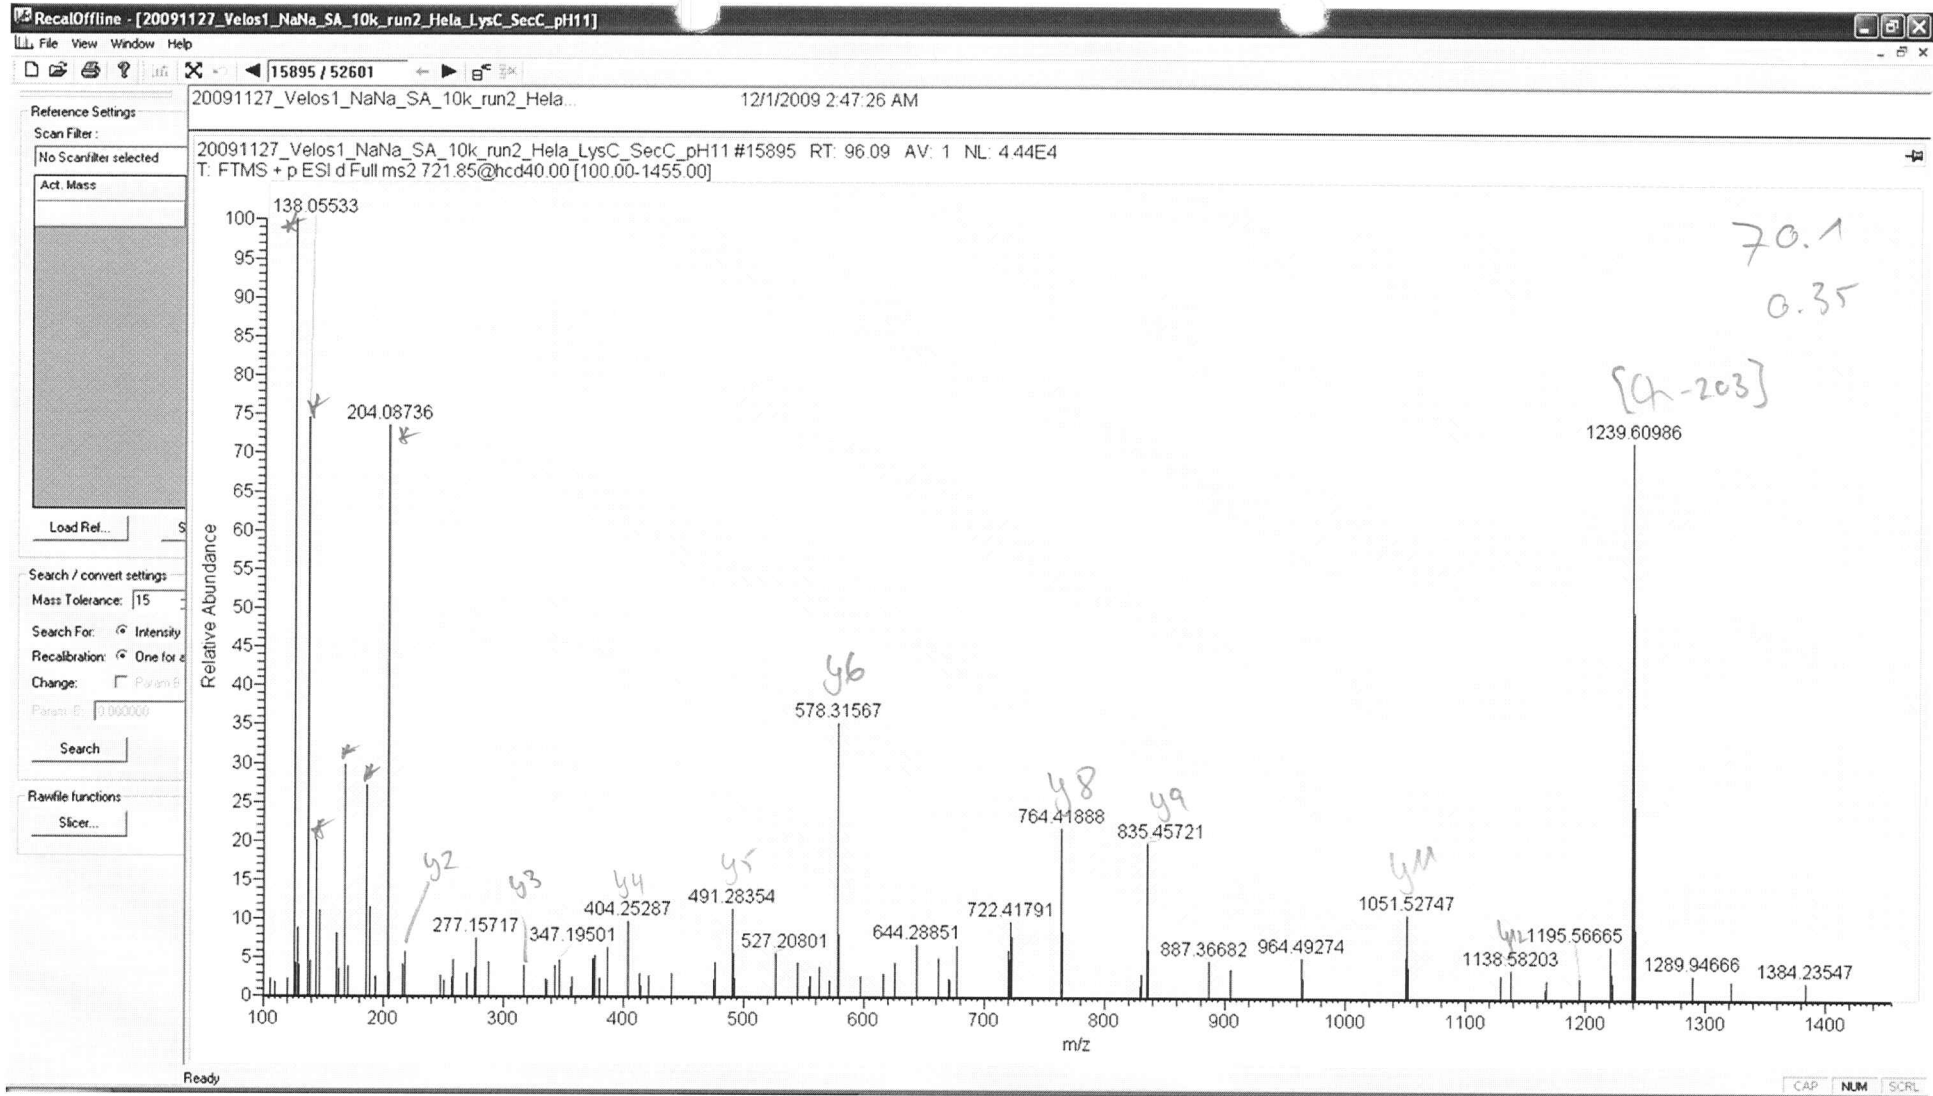

TSSEASVSSsVAK

y6

no 10<sup>6</sup> evidence

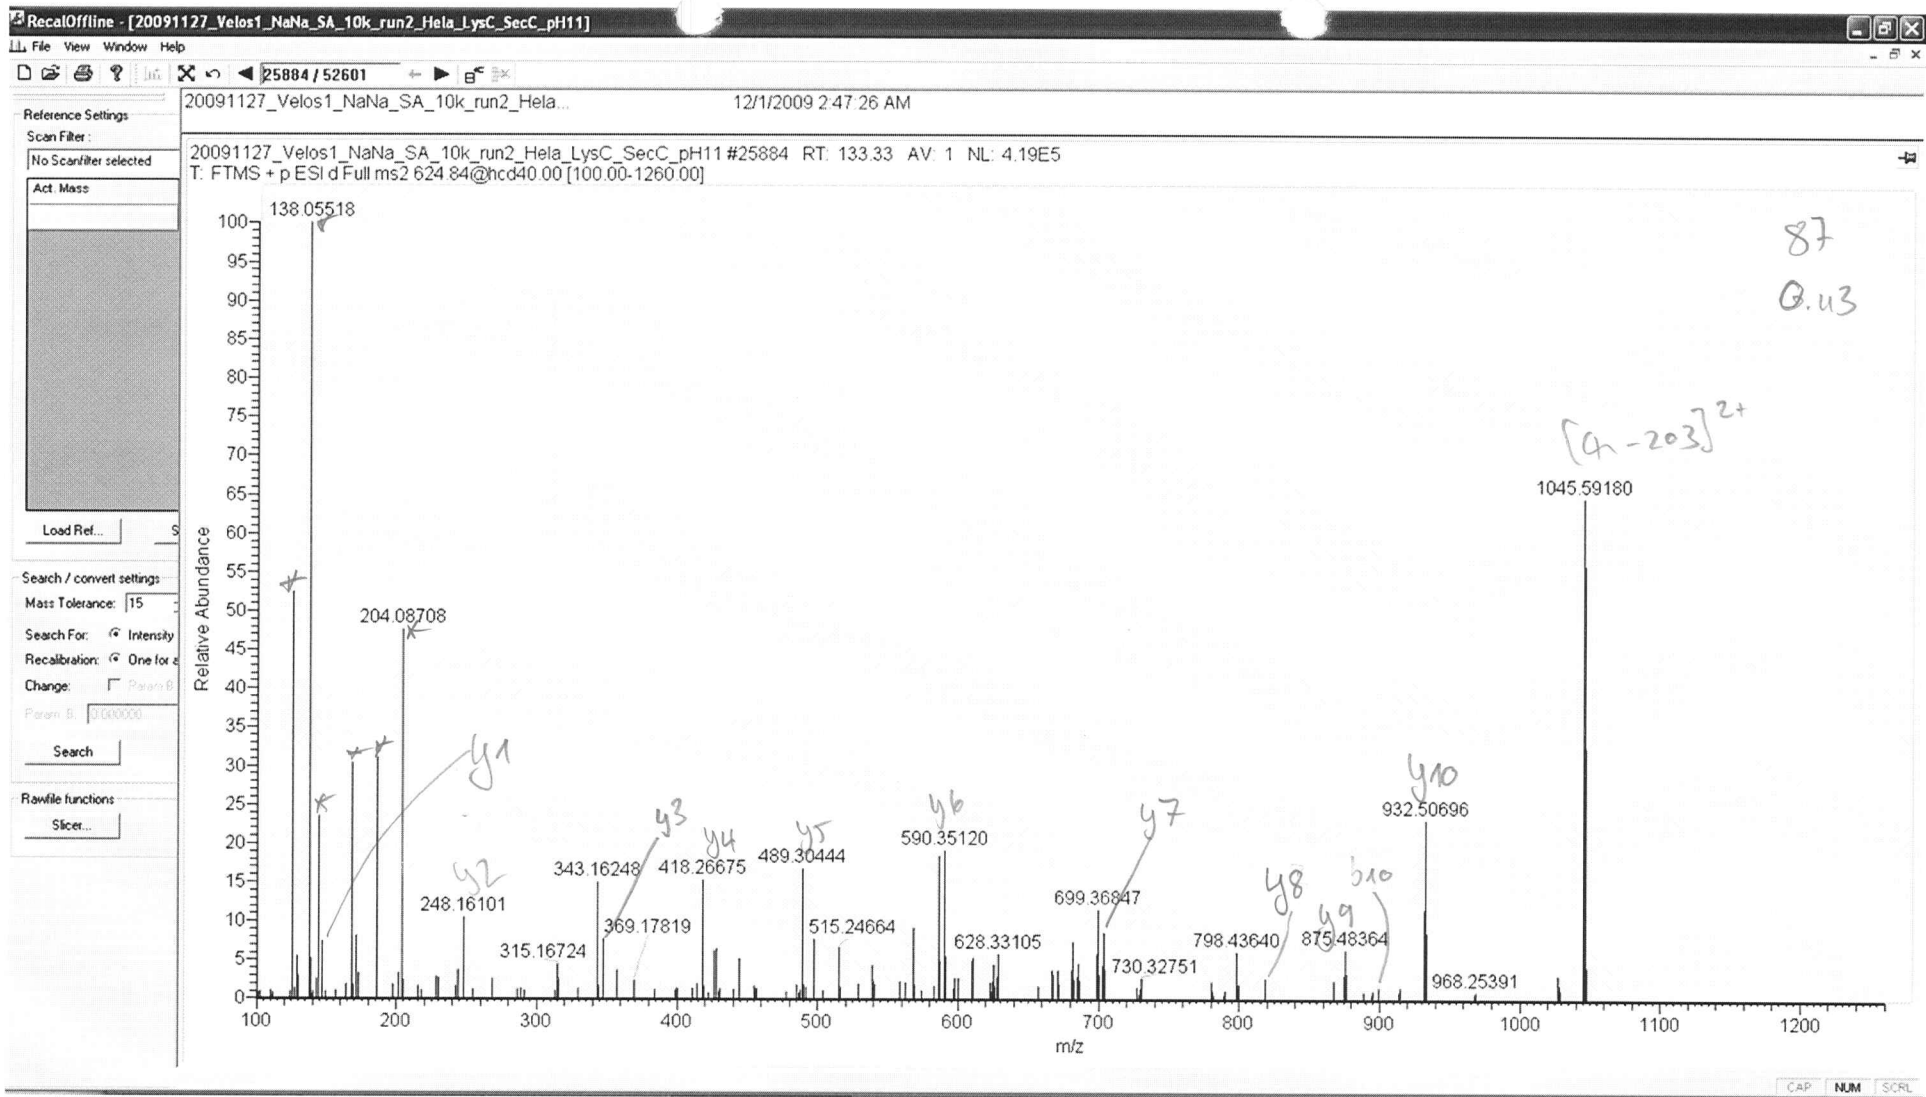

no fish evidence

IGGDLTAAVtK

123

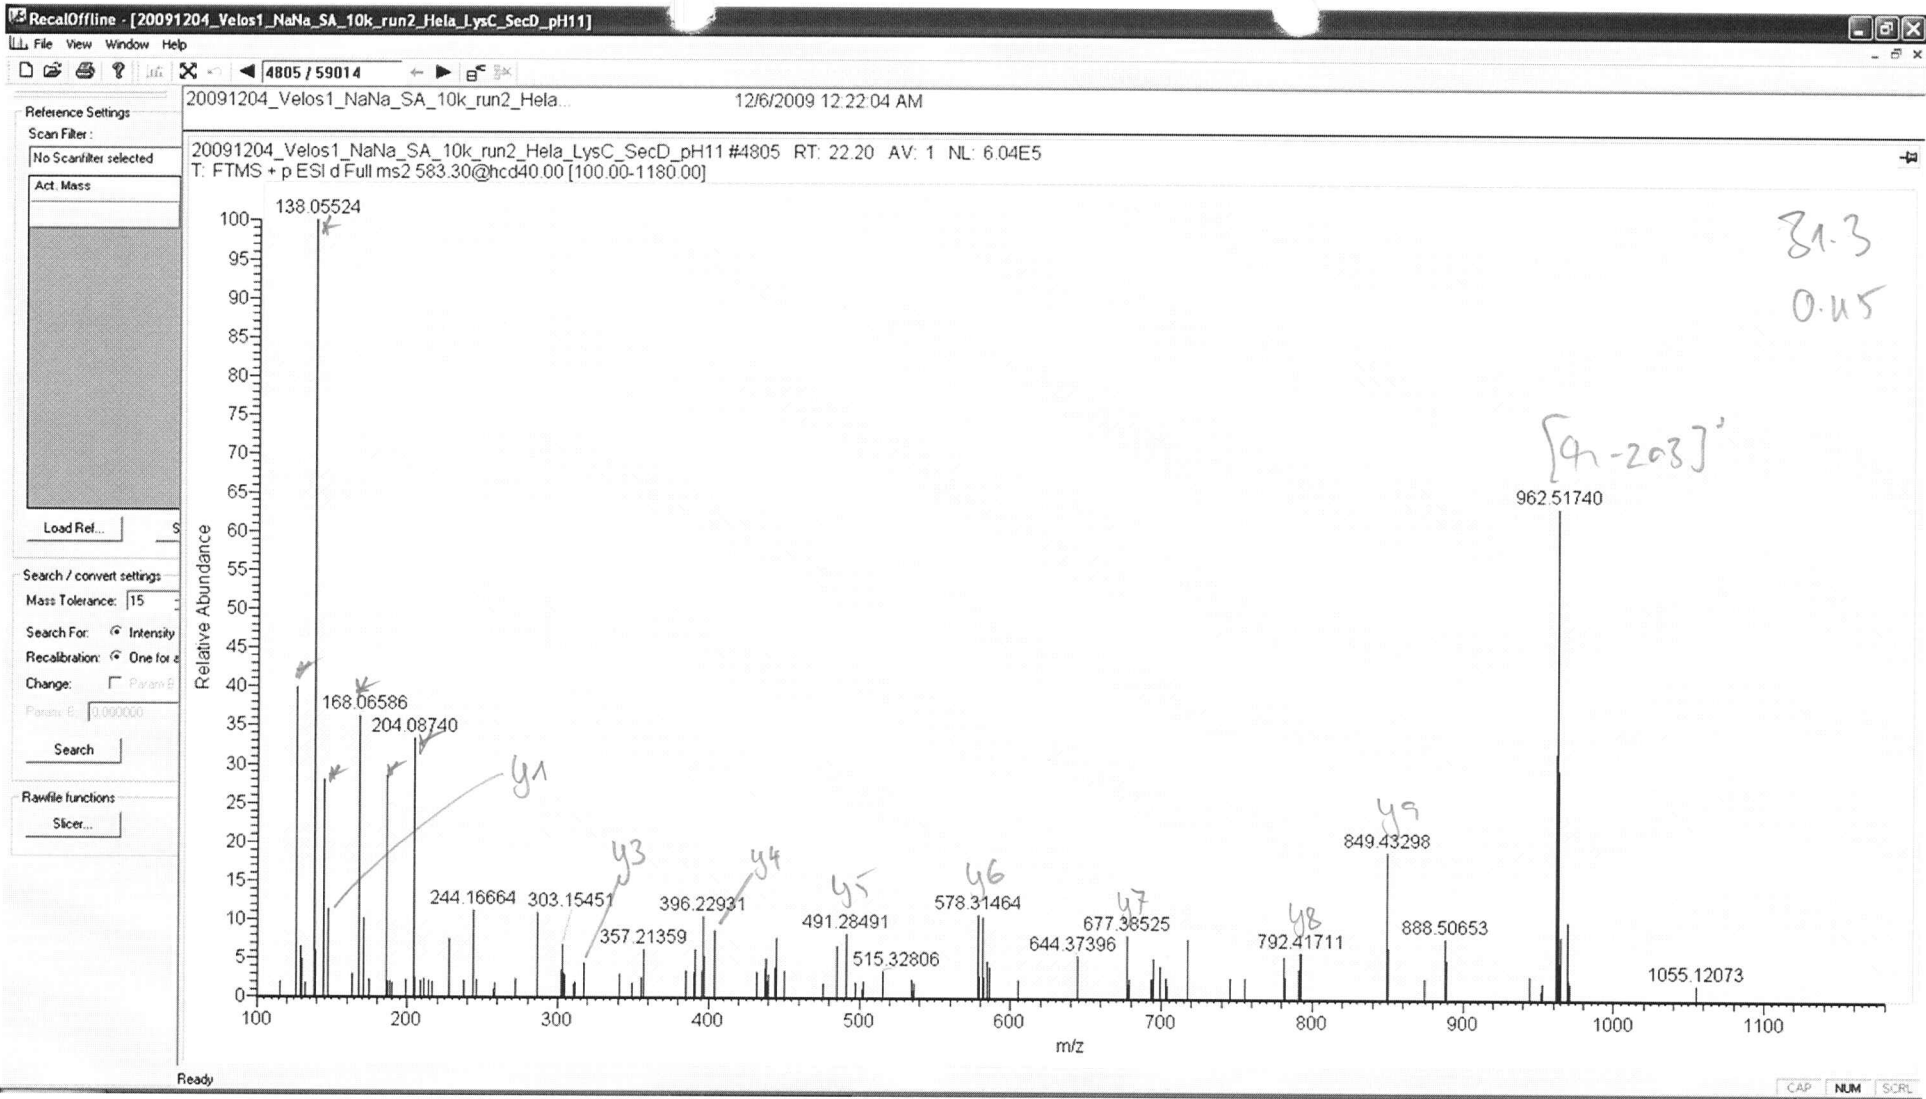

no hit  
evidence

IGDVSSsAVK

A24



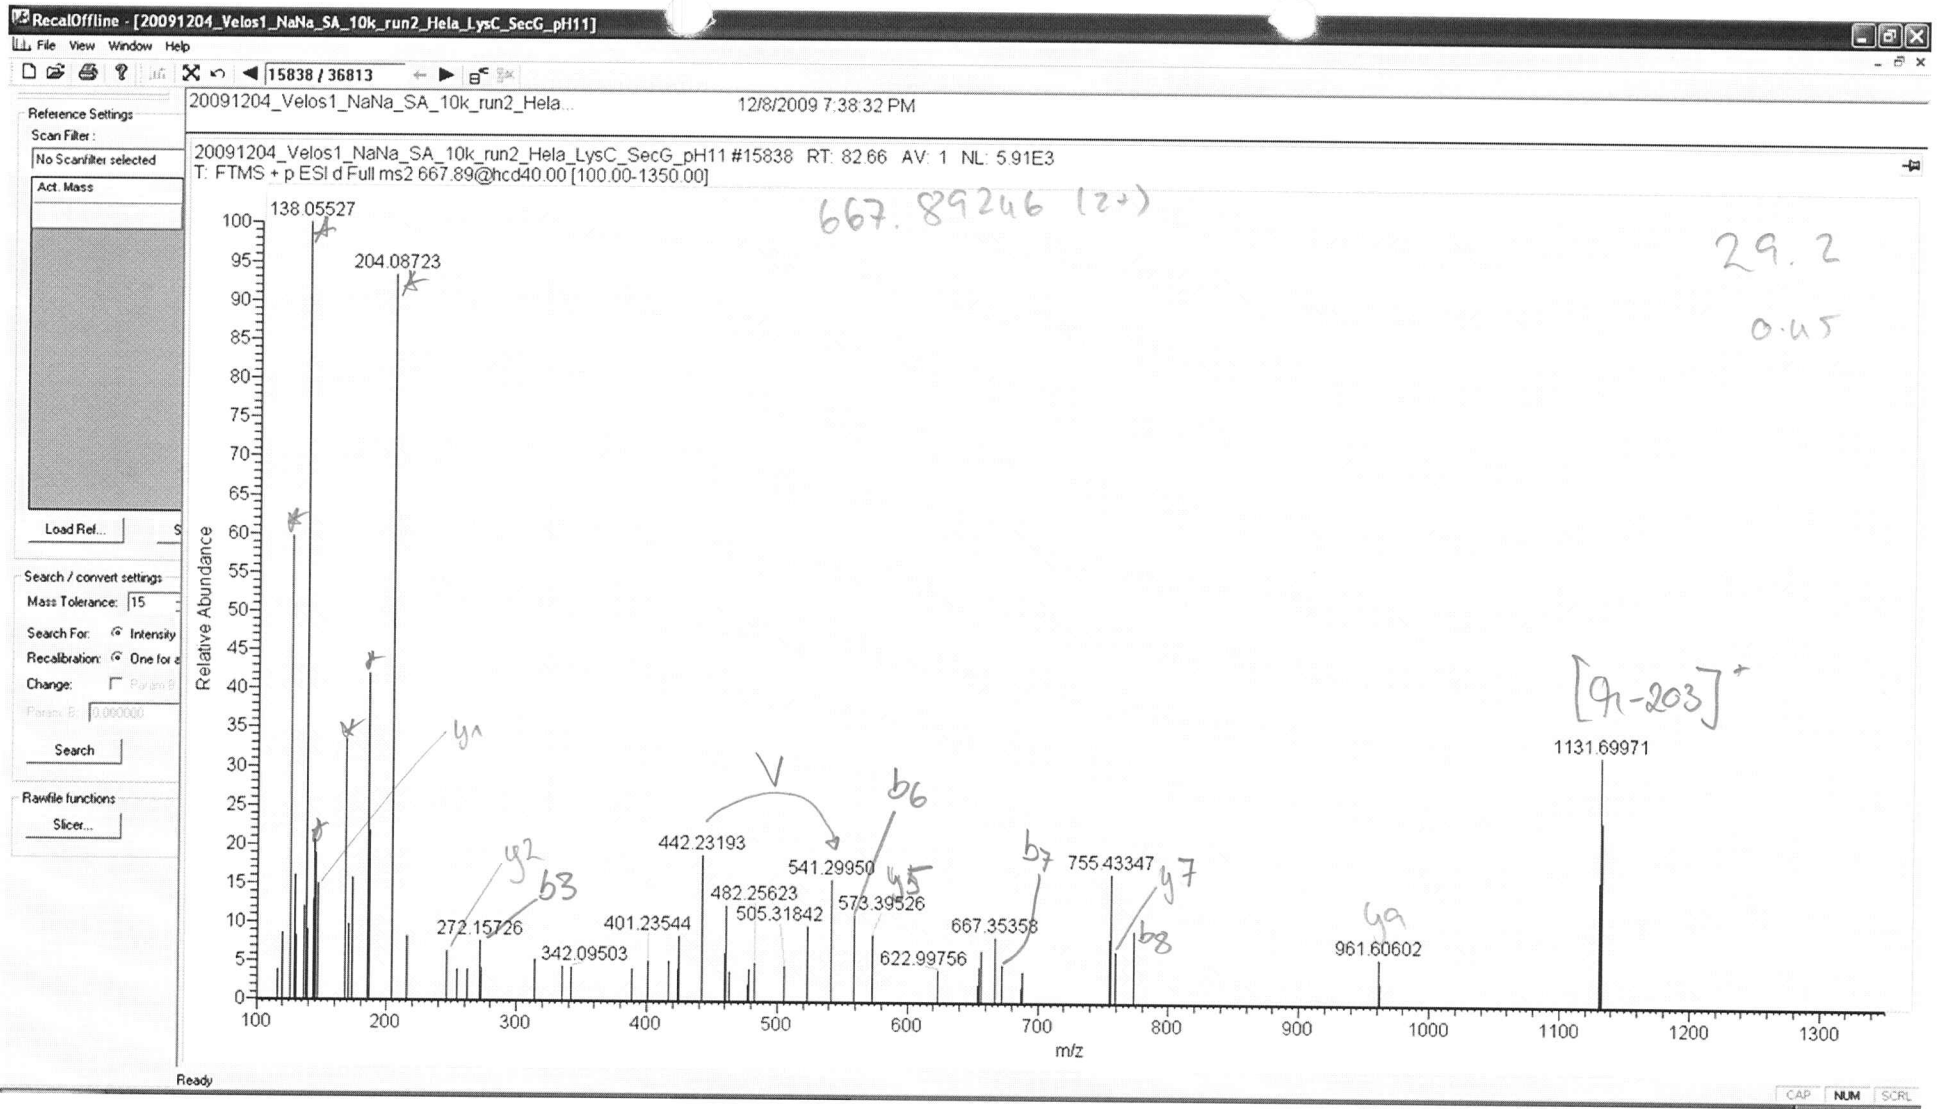

VATTSVItIVK

No site evidence

125

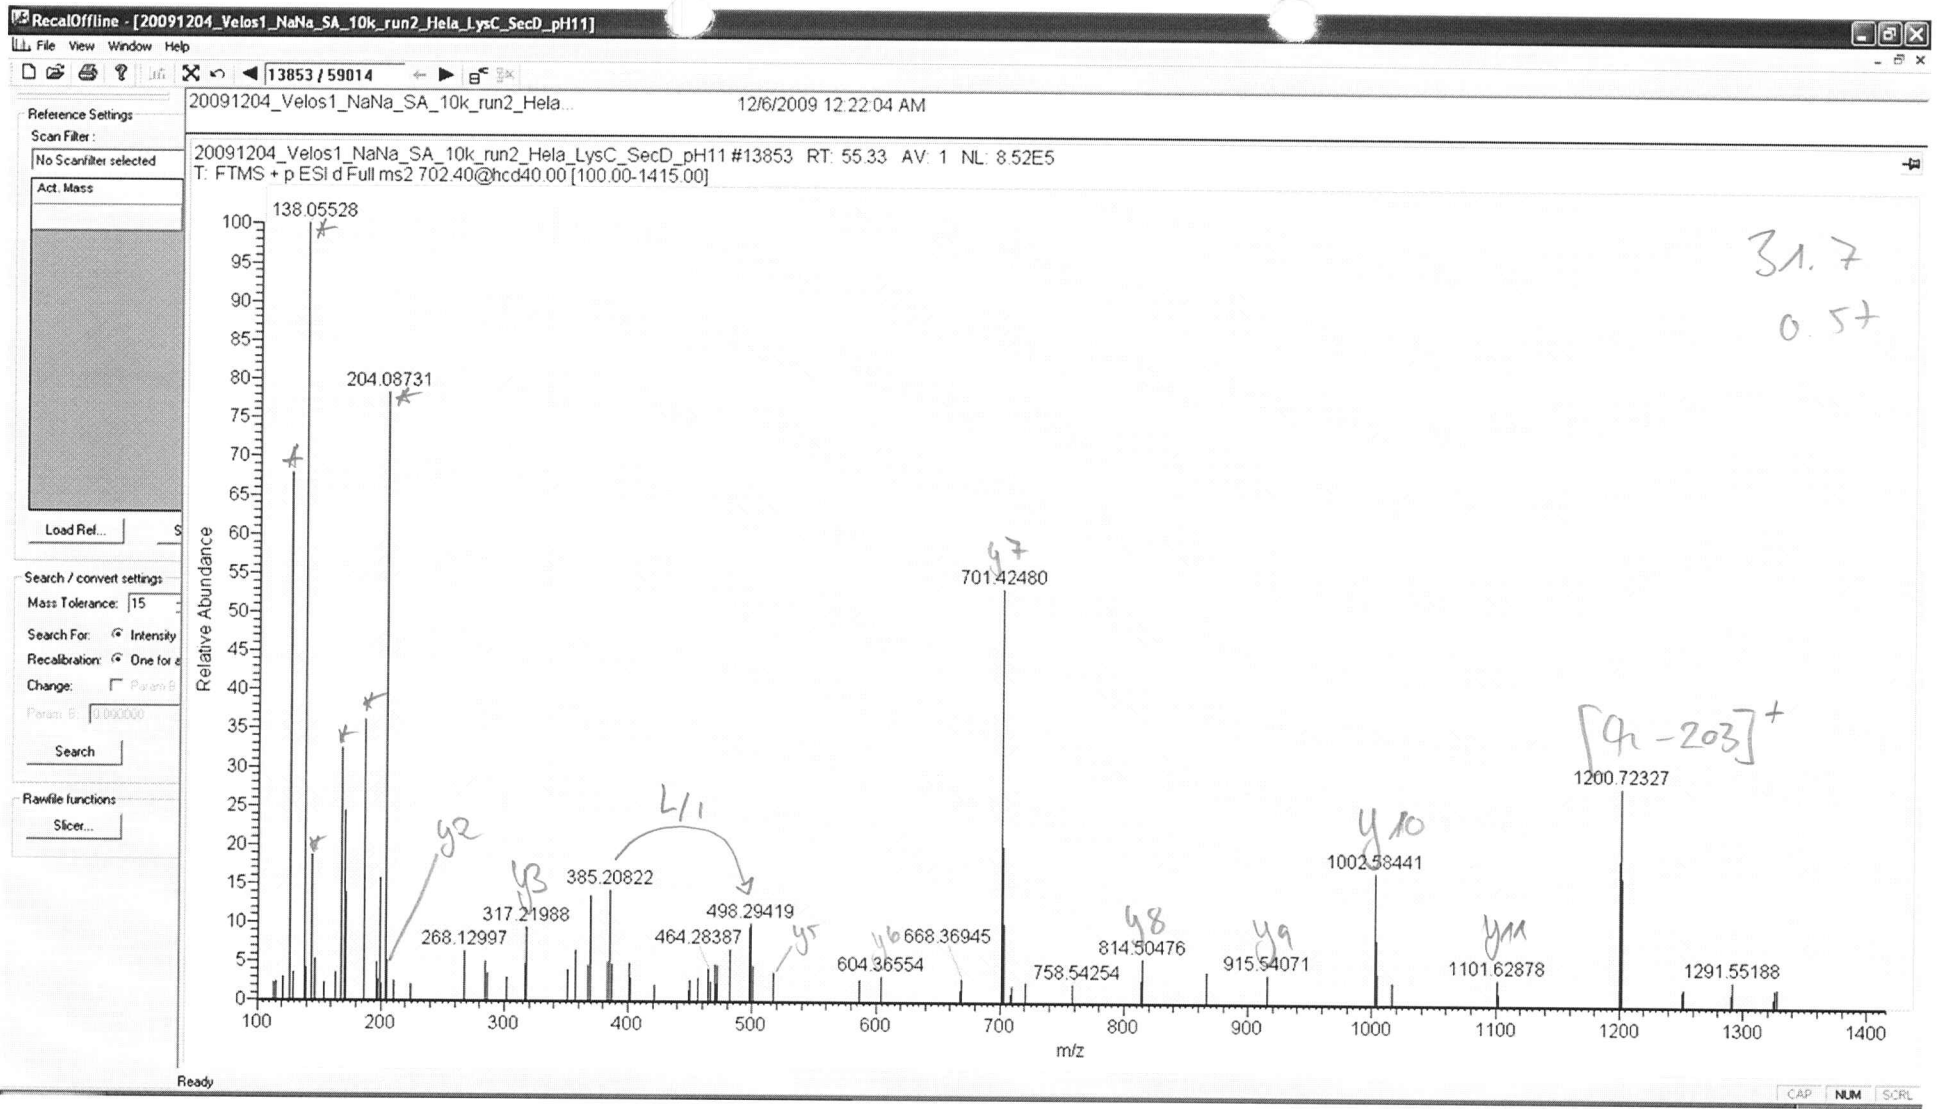

no bite evidence

VVSTLPstVLGK

126

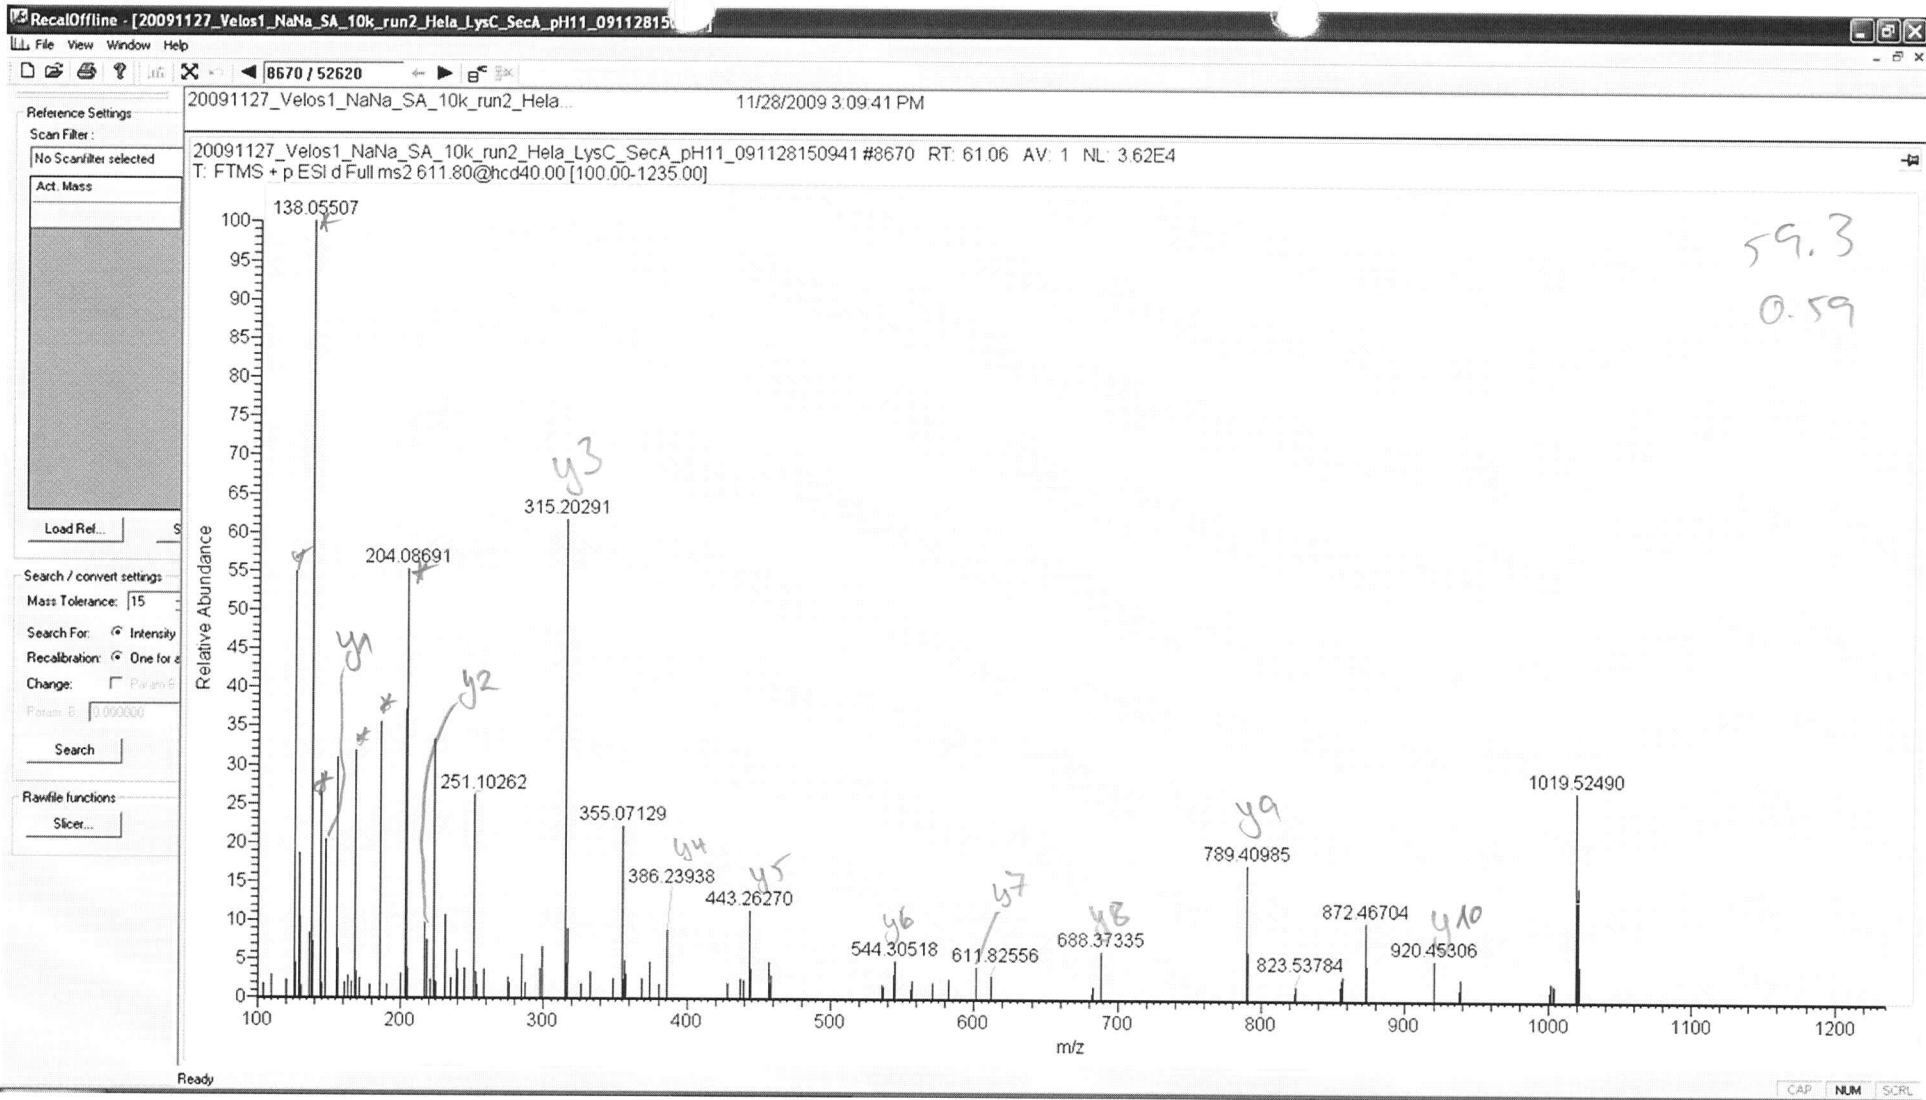

no 10k evidence

VMTSGtGAPAK

127

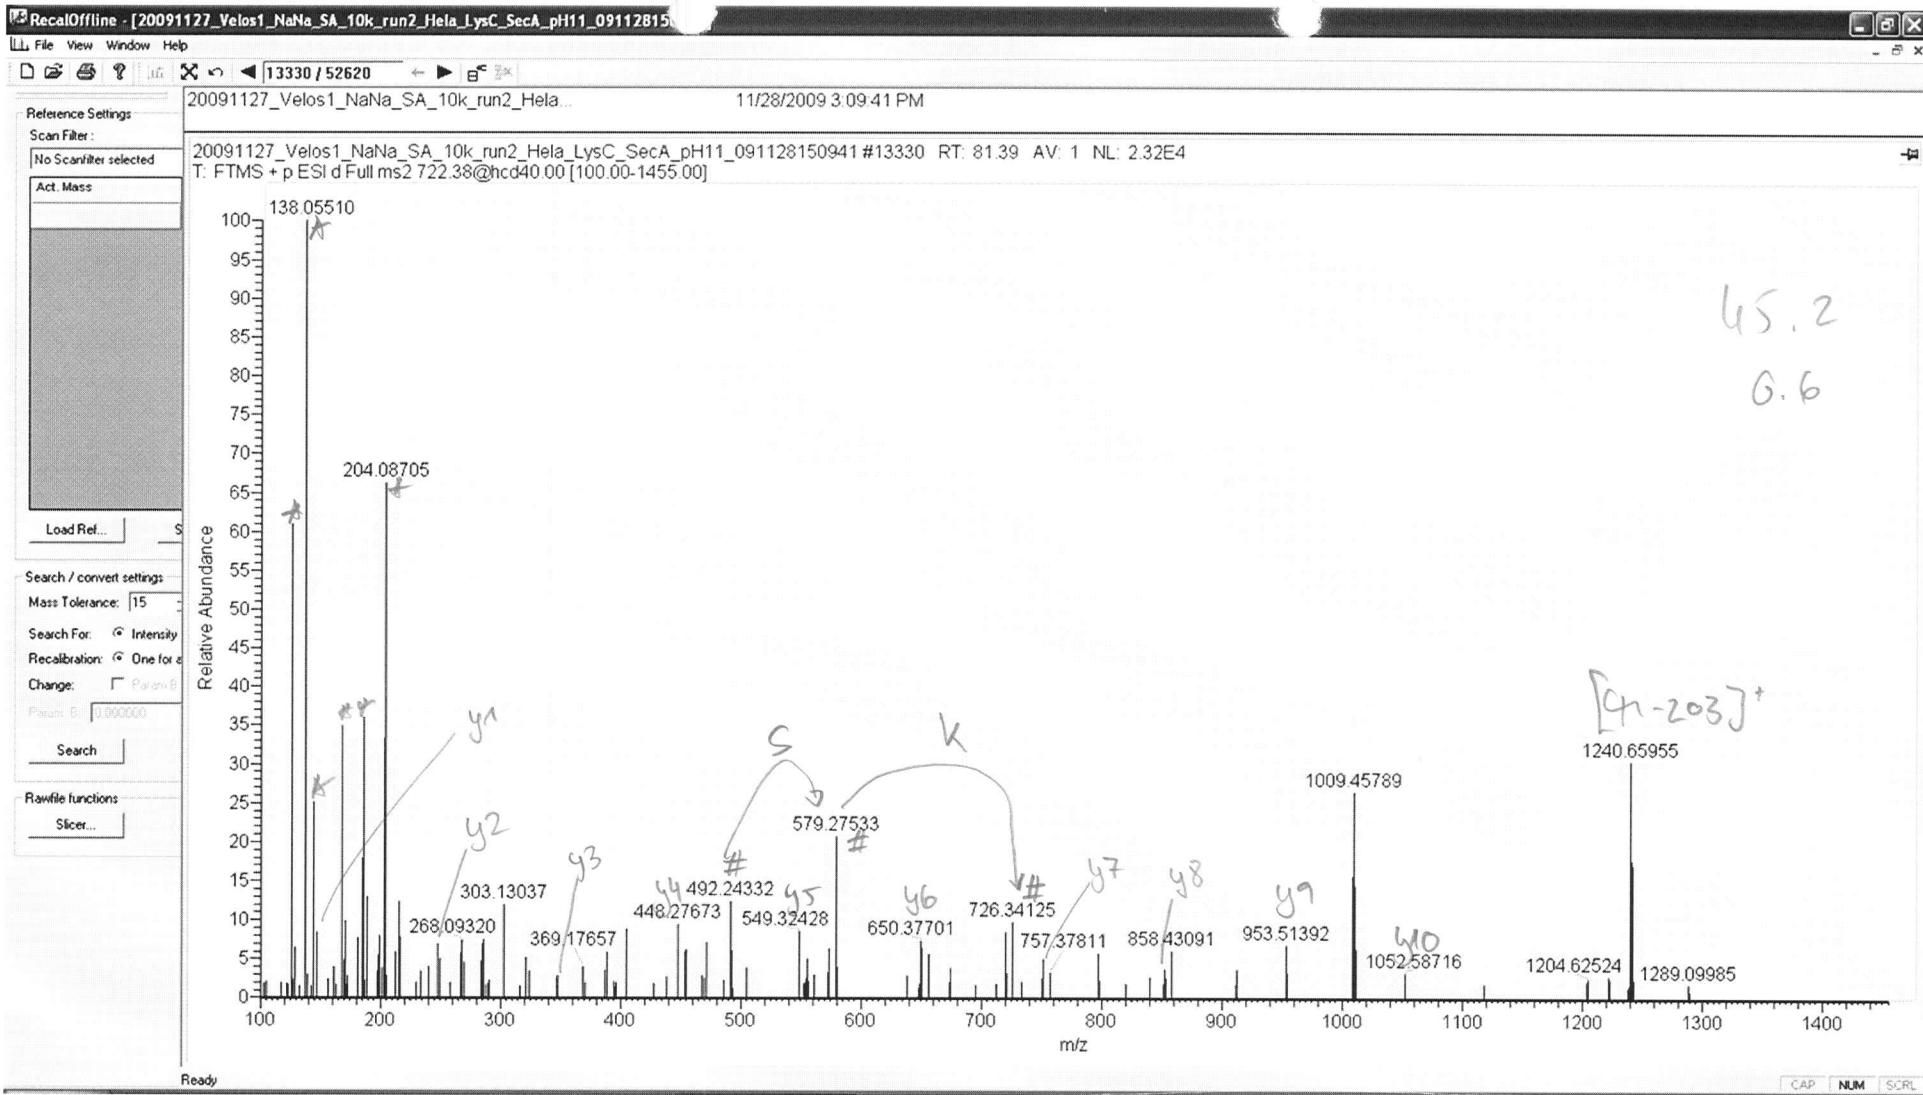

STVTTTTTTVtK

no site evidence

# chimeric spectrum:  
 second ion series of  
 co-isolated  
 precursor 128

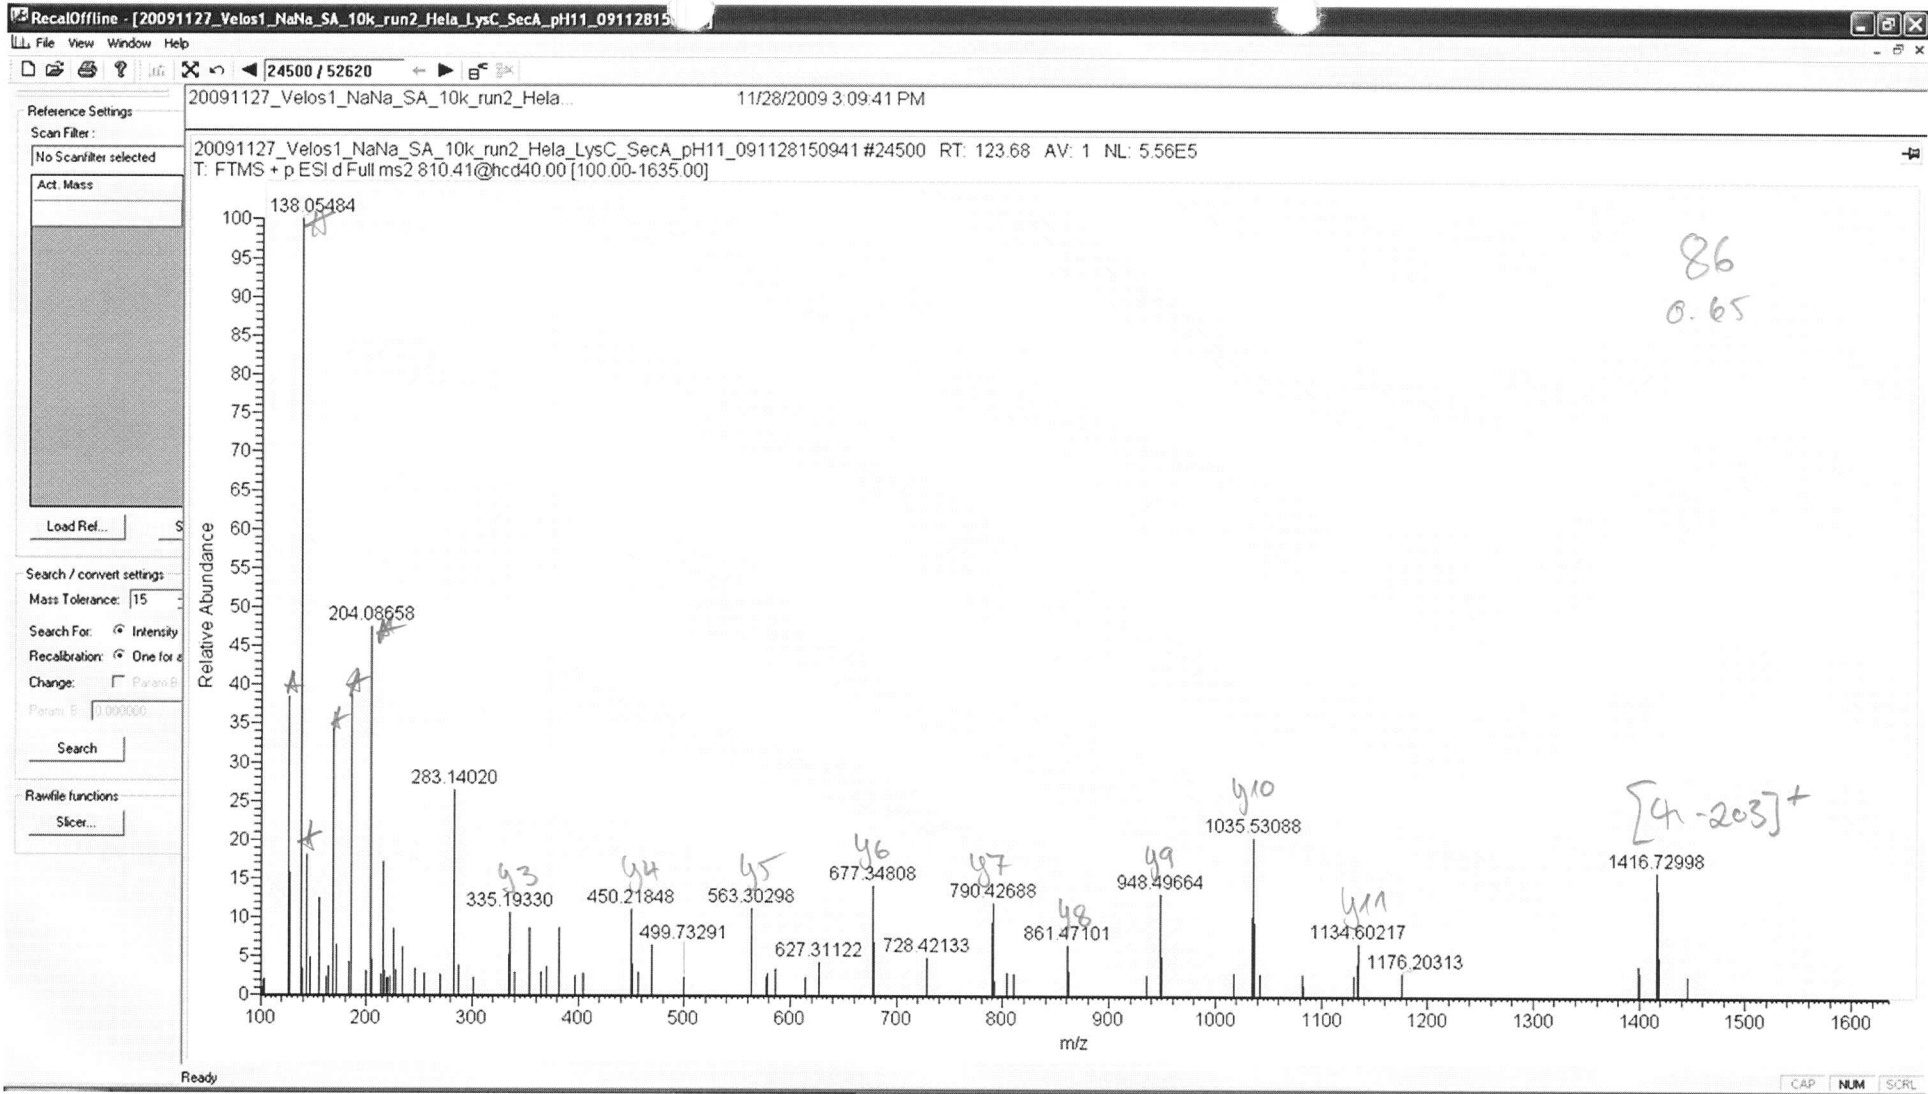

no site evidence

GPQVSSALNLDTSK

129

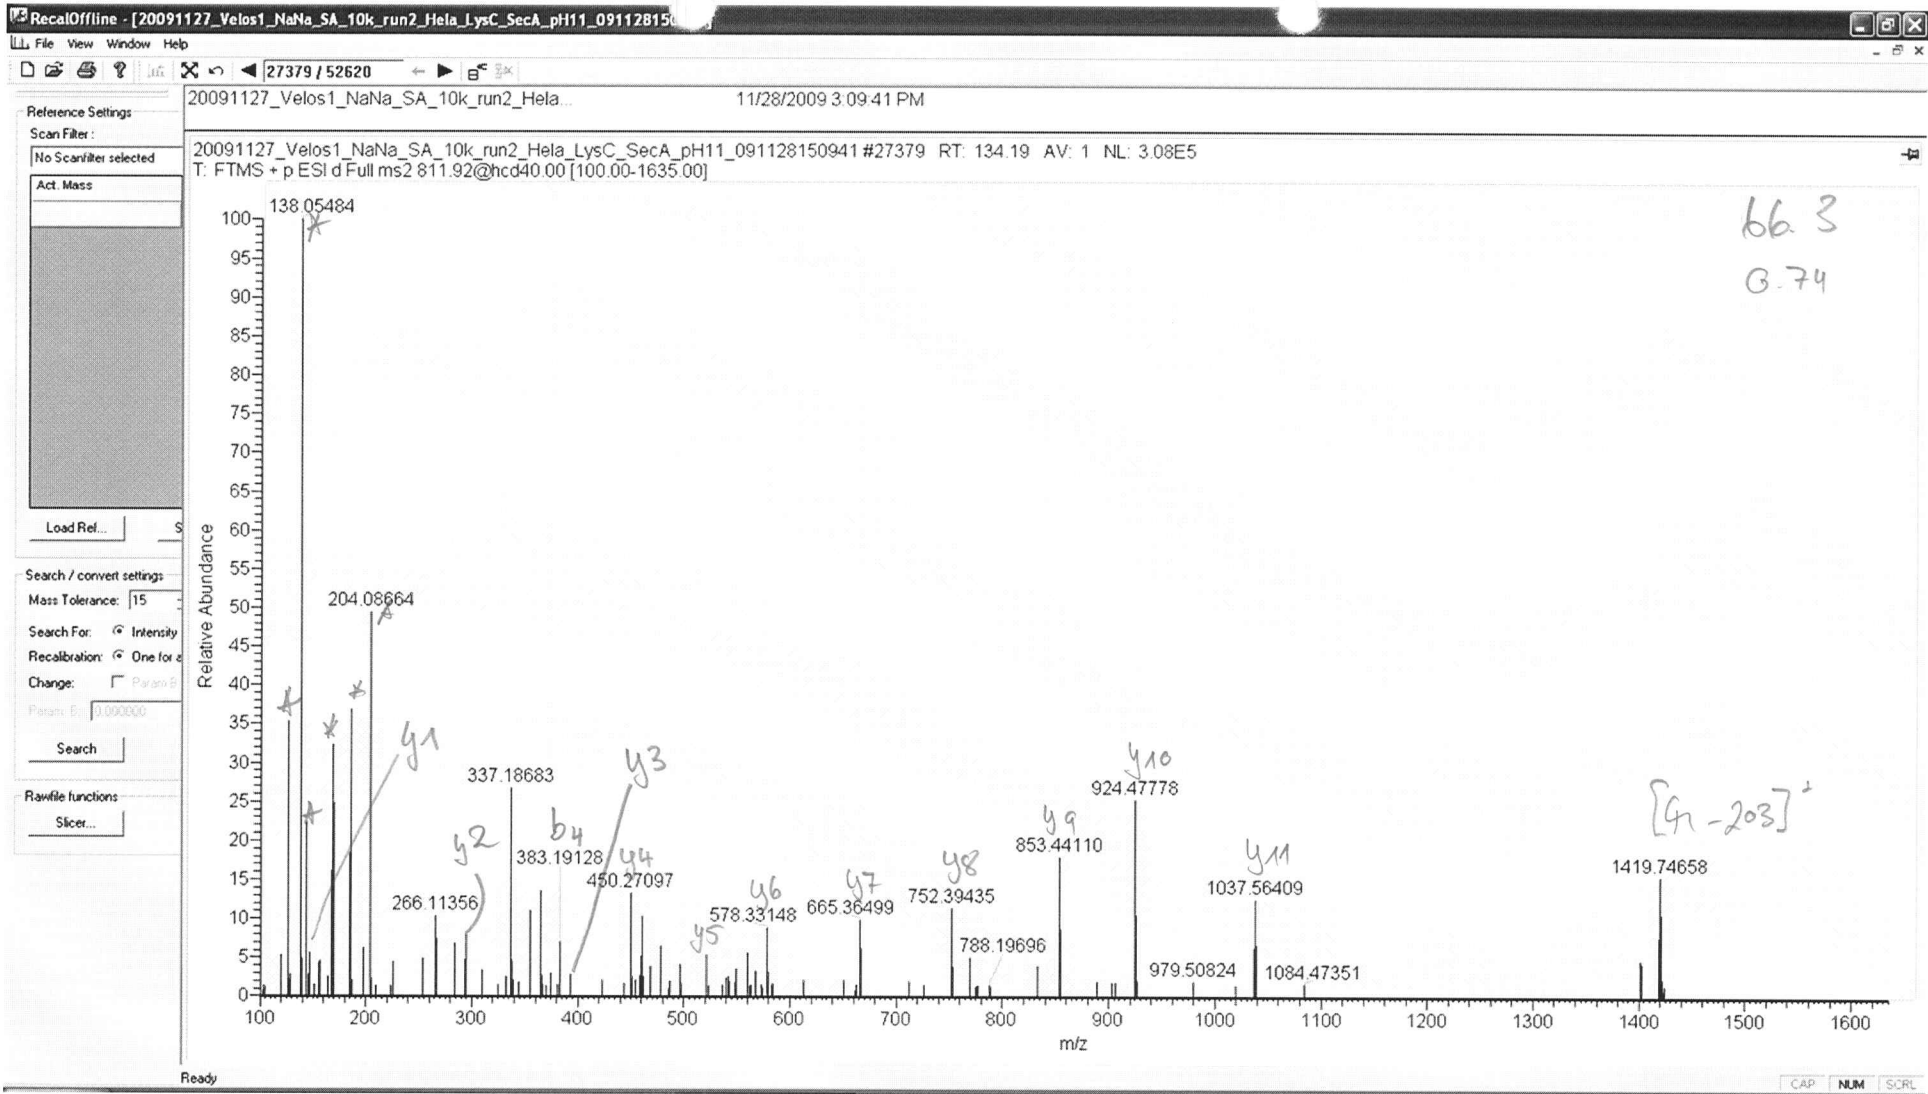

no hit  
evidence

EGPVLATSSGAGVFK

130

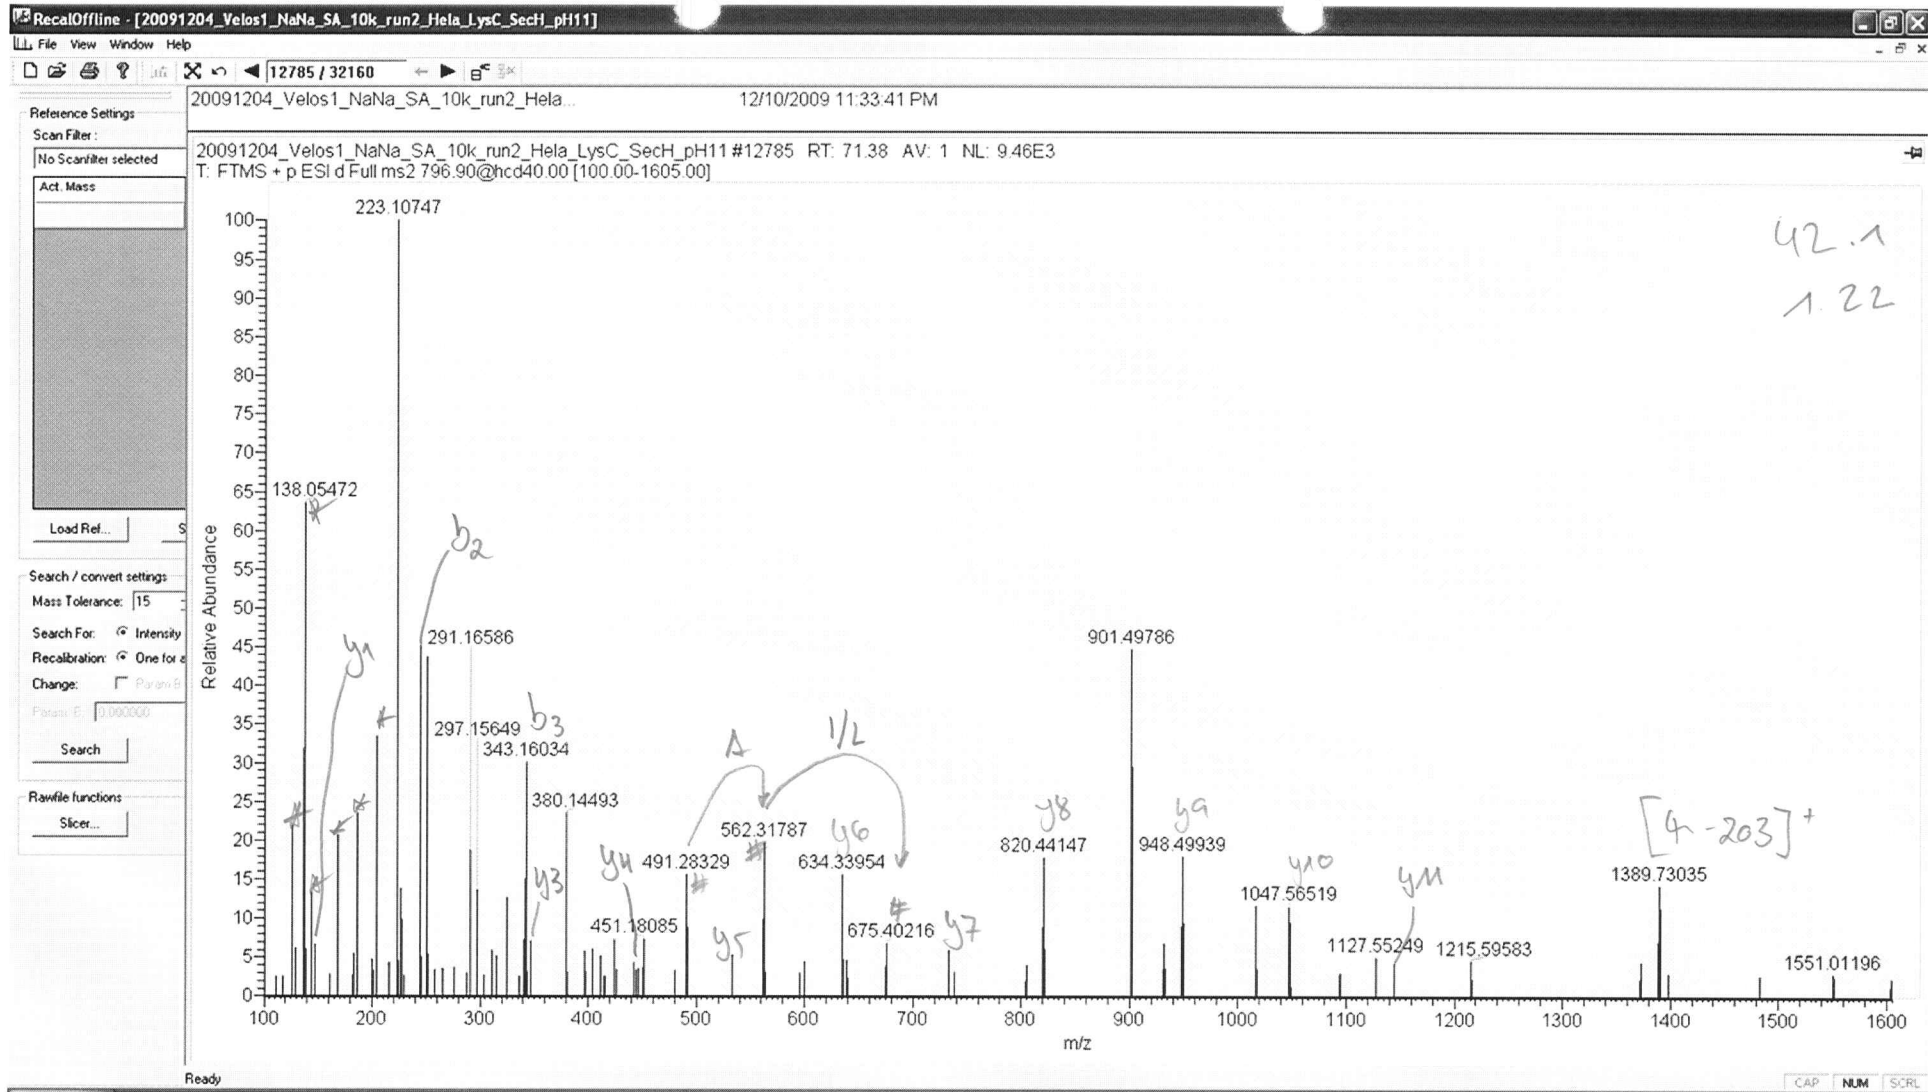

ENVVQSVTsVAEK

# chimeric spectrum:  
2nd ion series from  
correlated precursor

No site evidence

131





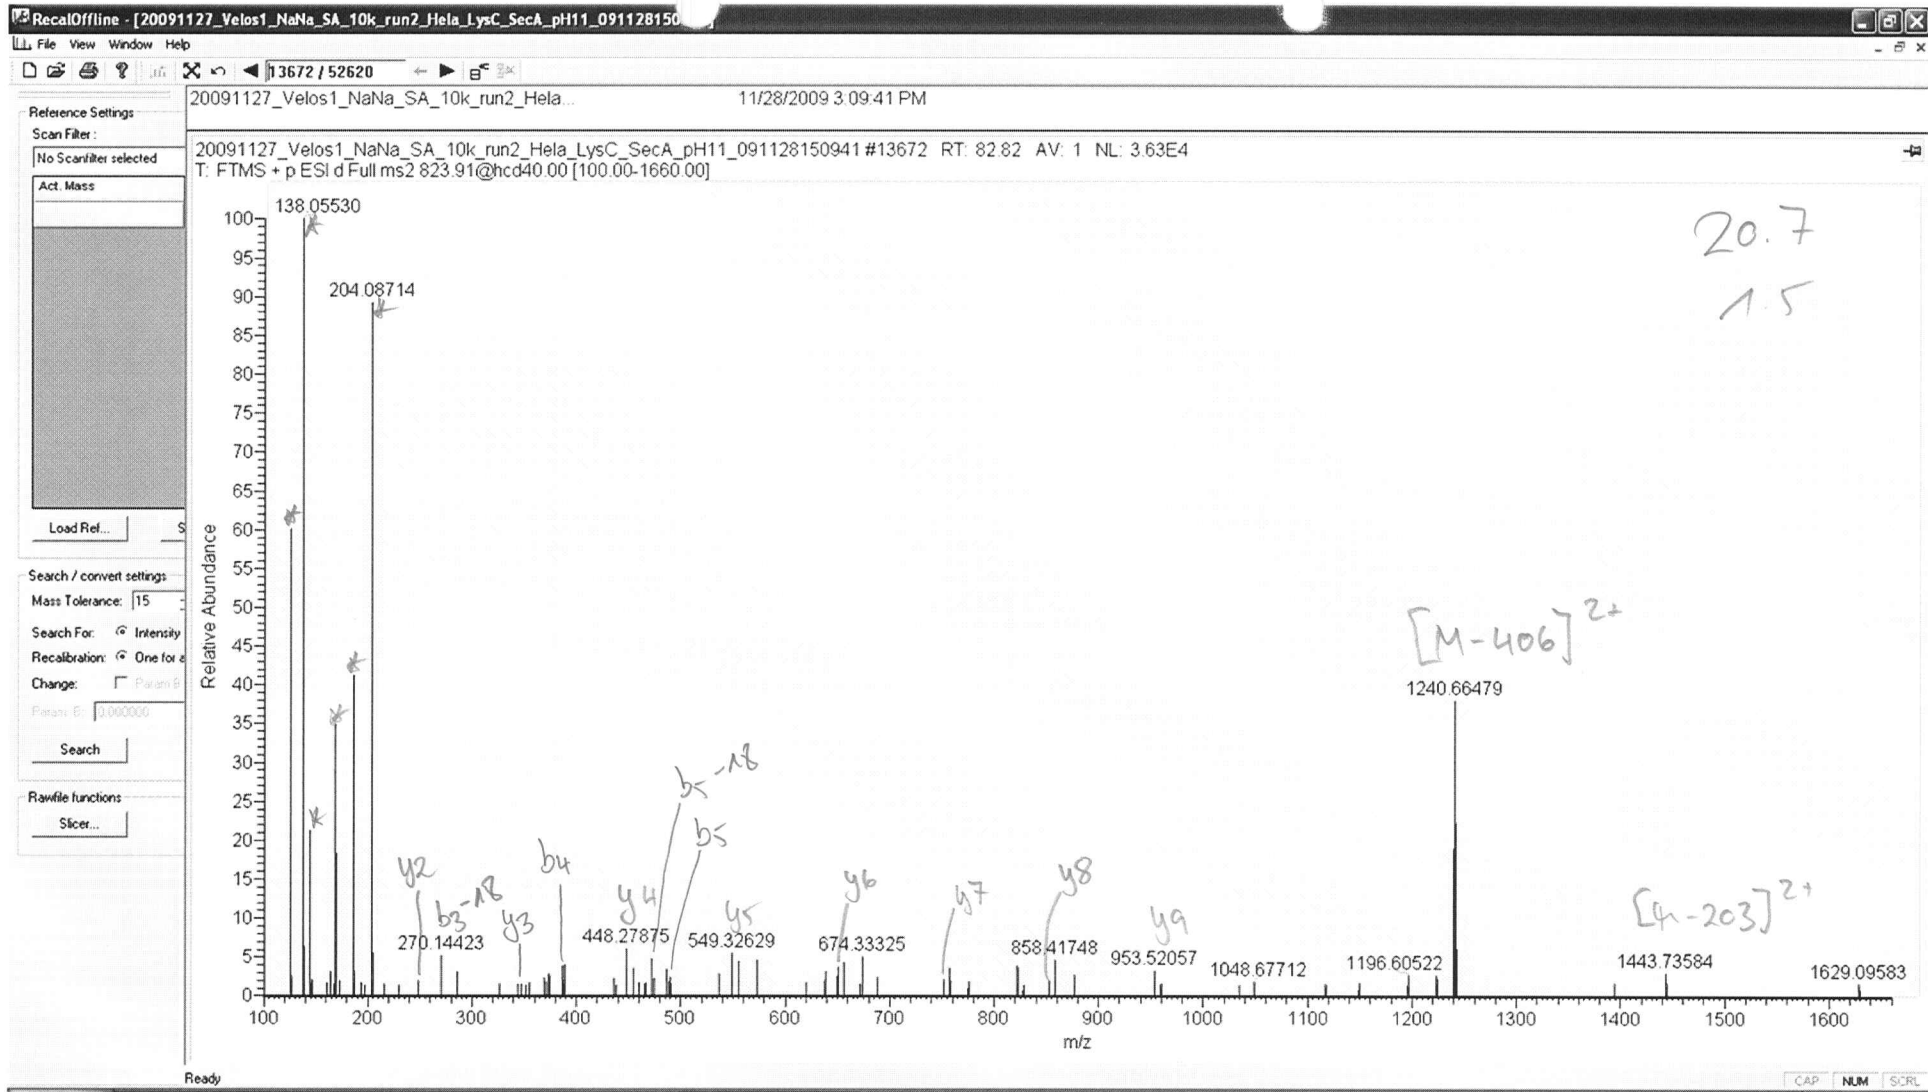

no site evidence

STVTTTTTtVtK

133

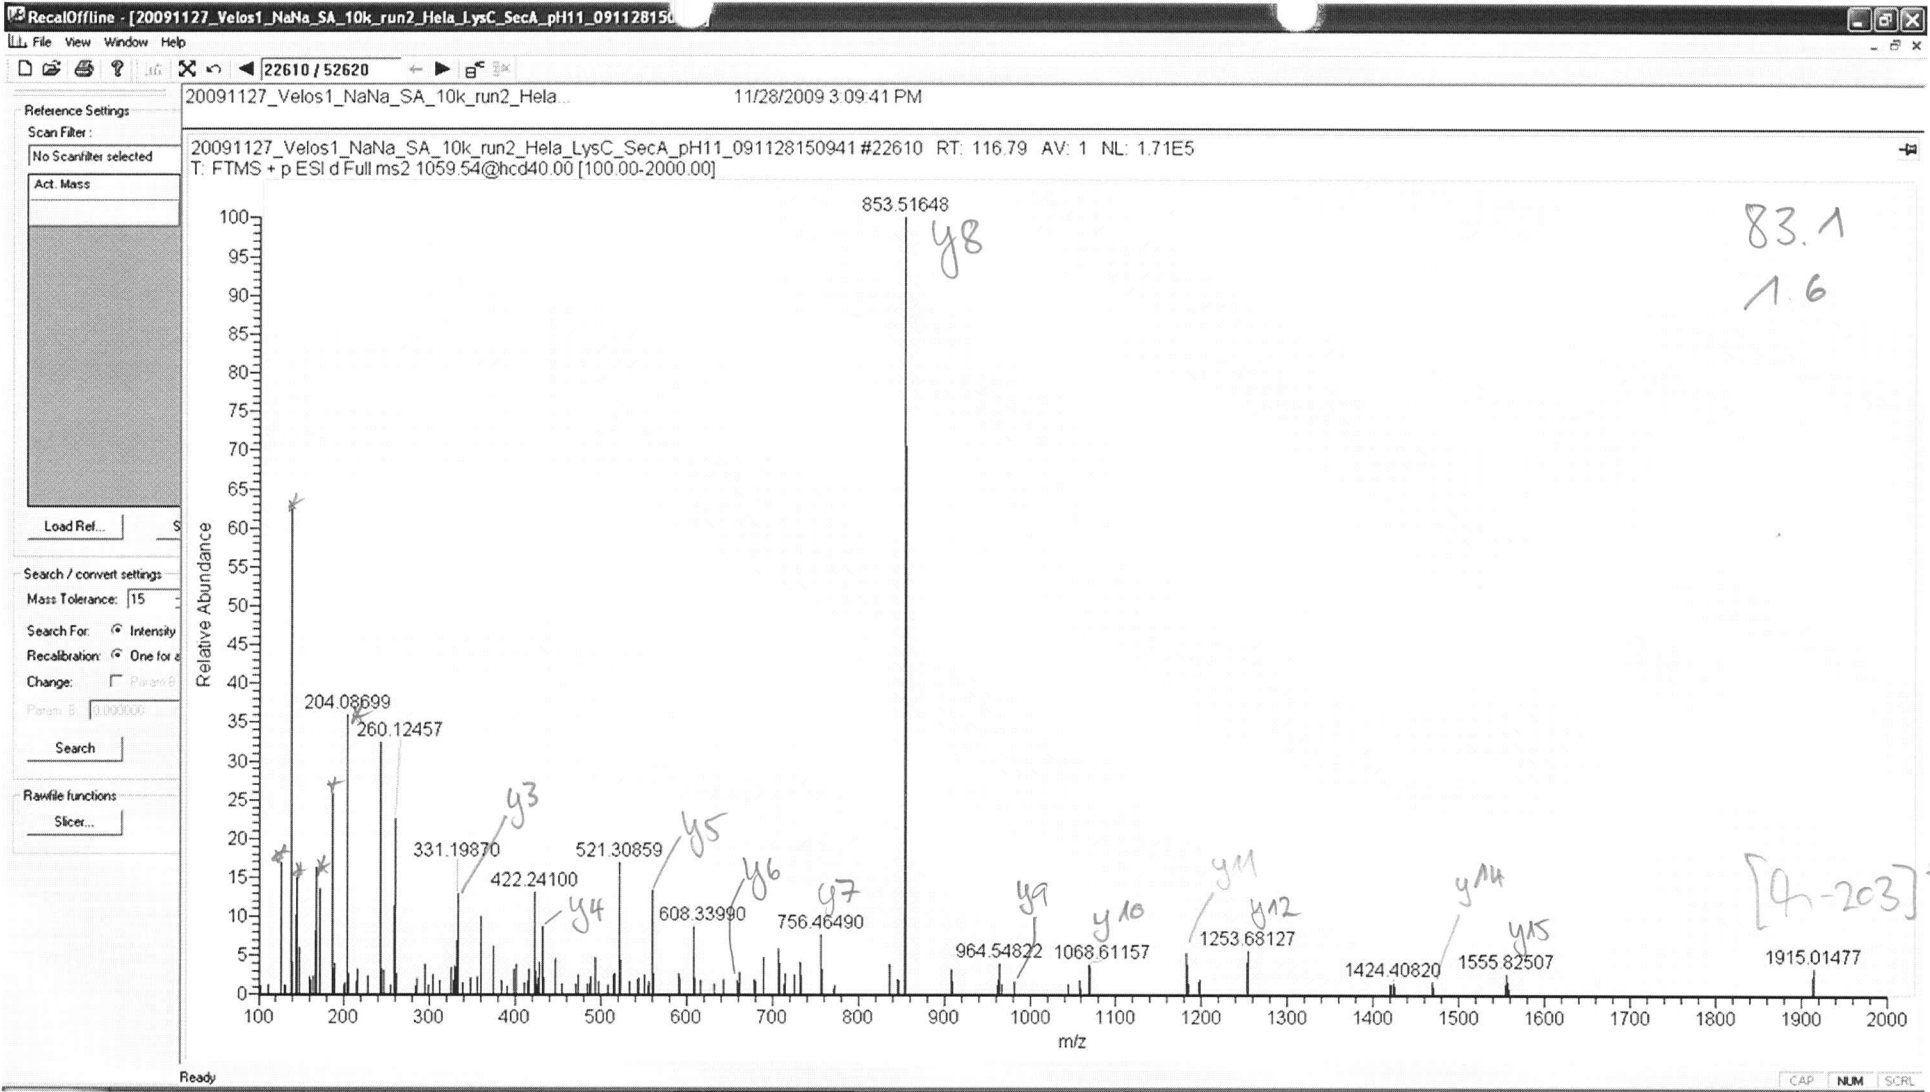

no site evidence

TSAVSSQANSQPPVQV<sup>y8</sup>sVK

134

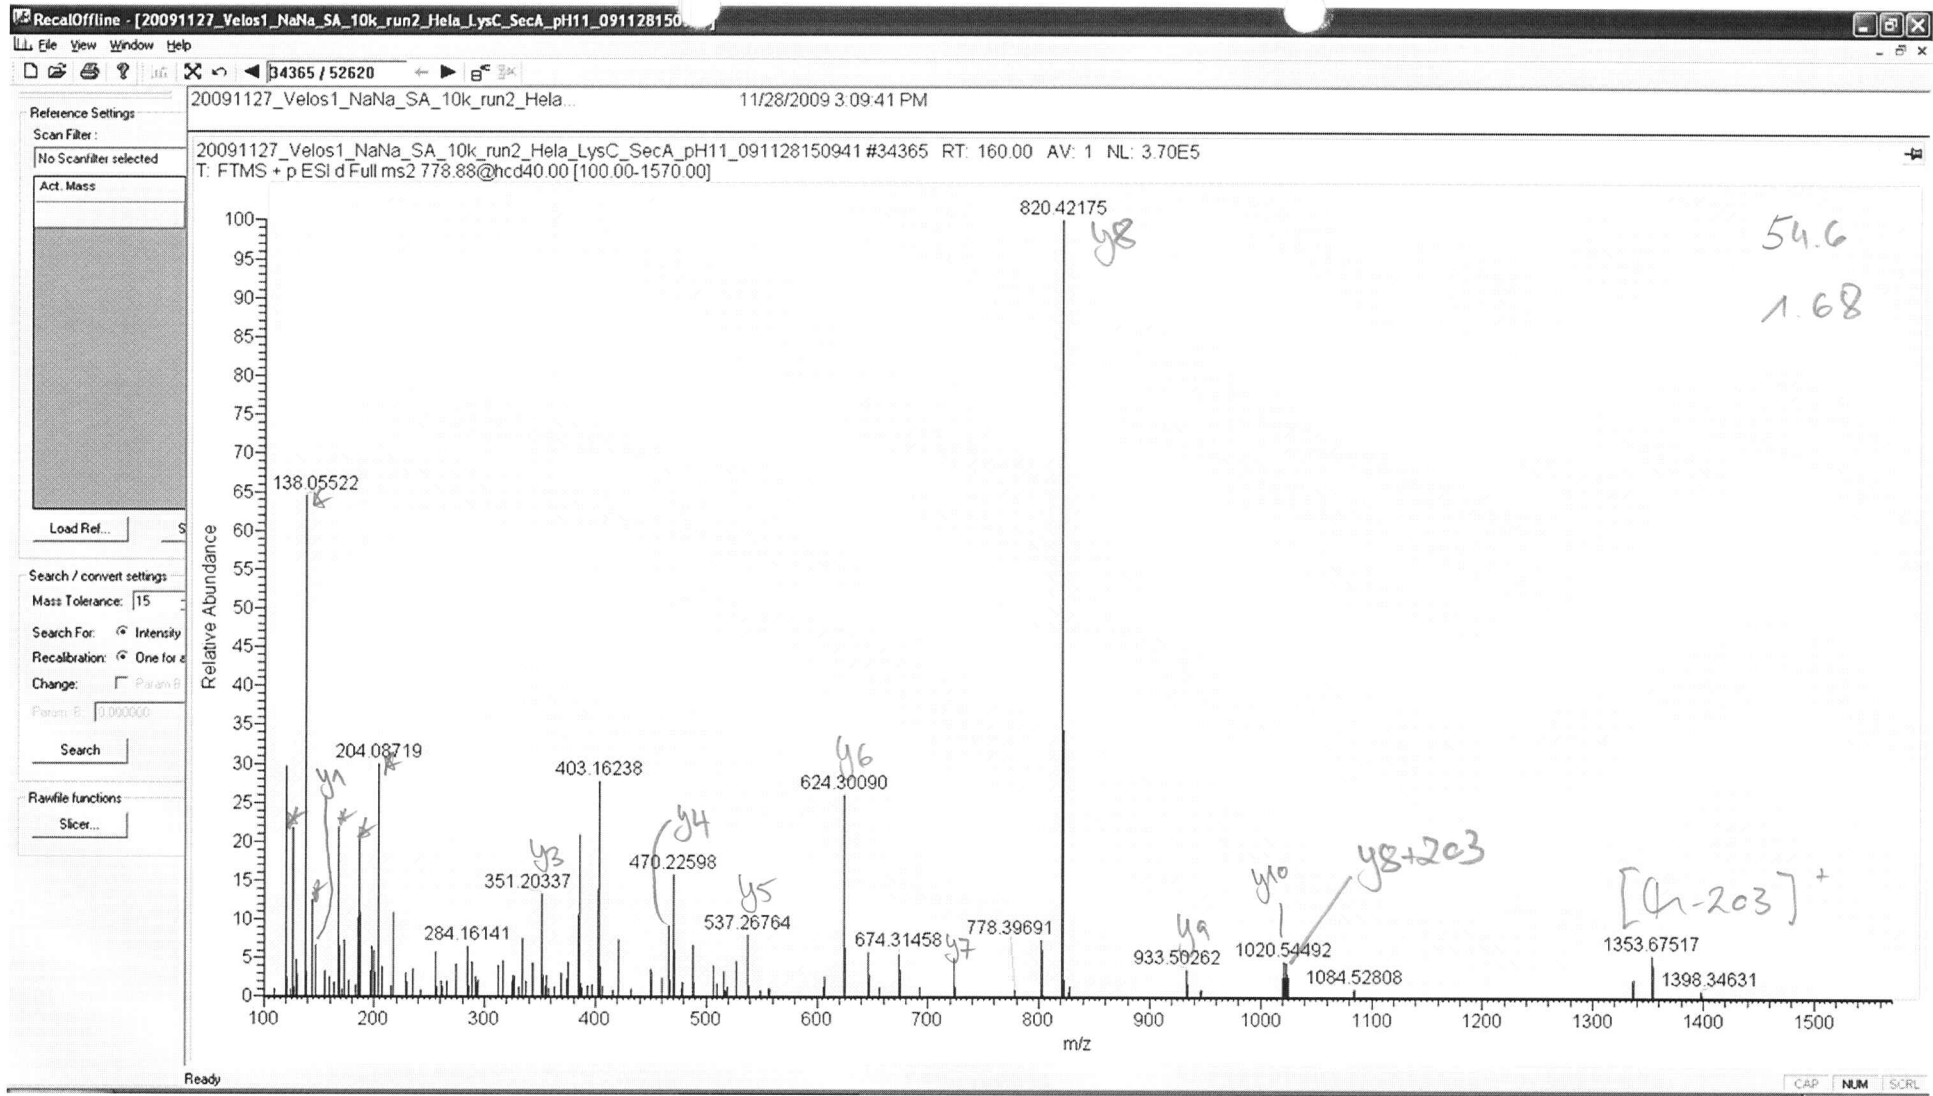

y8  
EGFSIPVsADGFK

S8

135

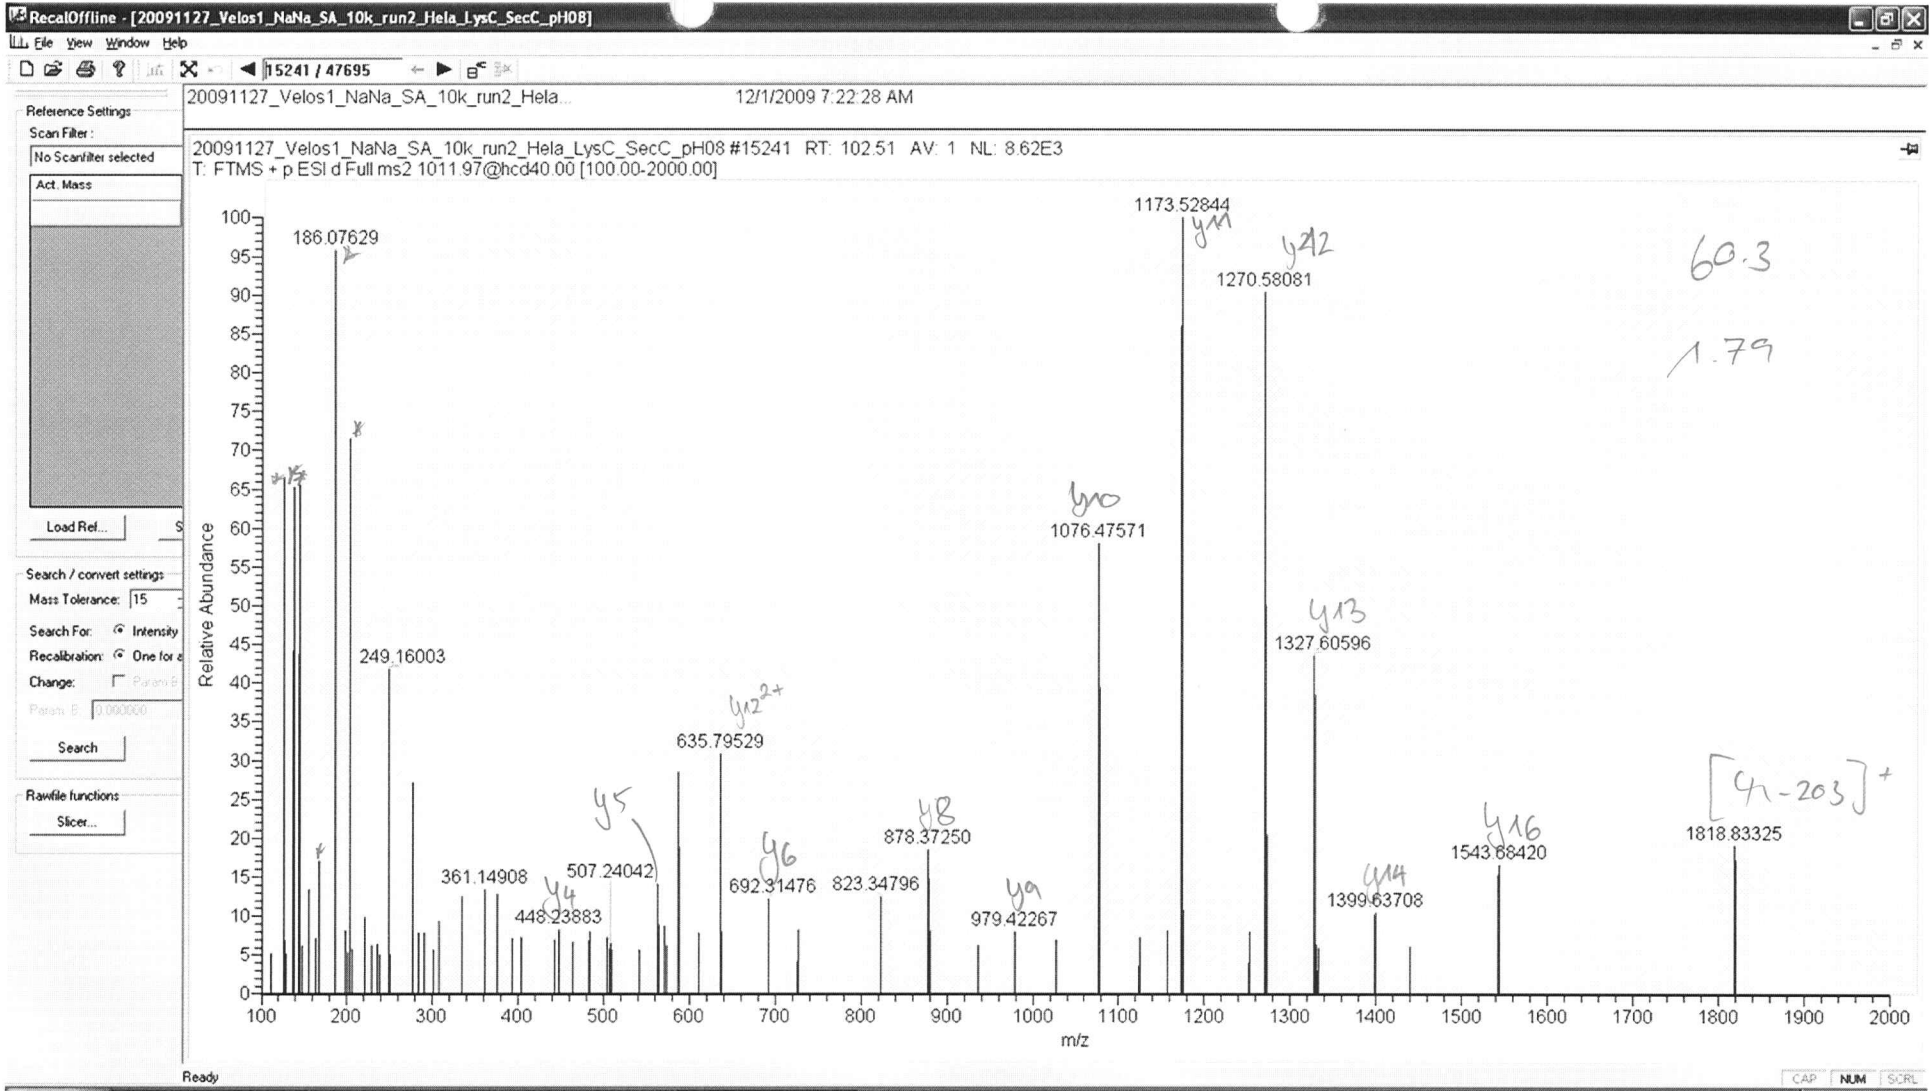

no site evidence

LYGsAGPPPTGEEDTAEK

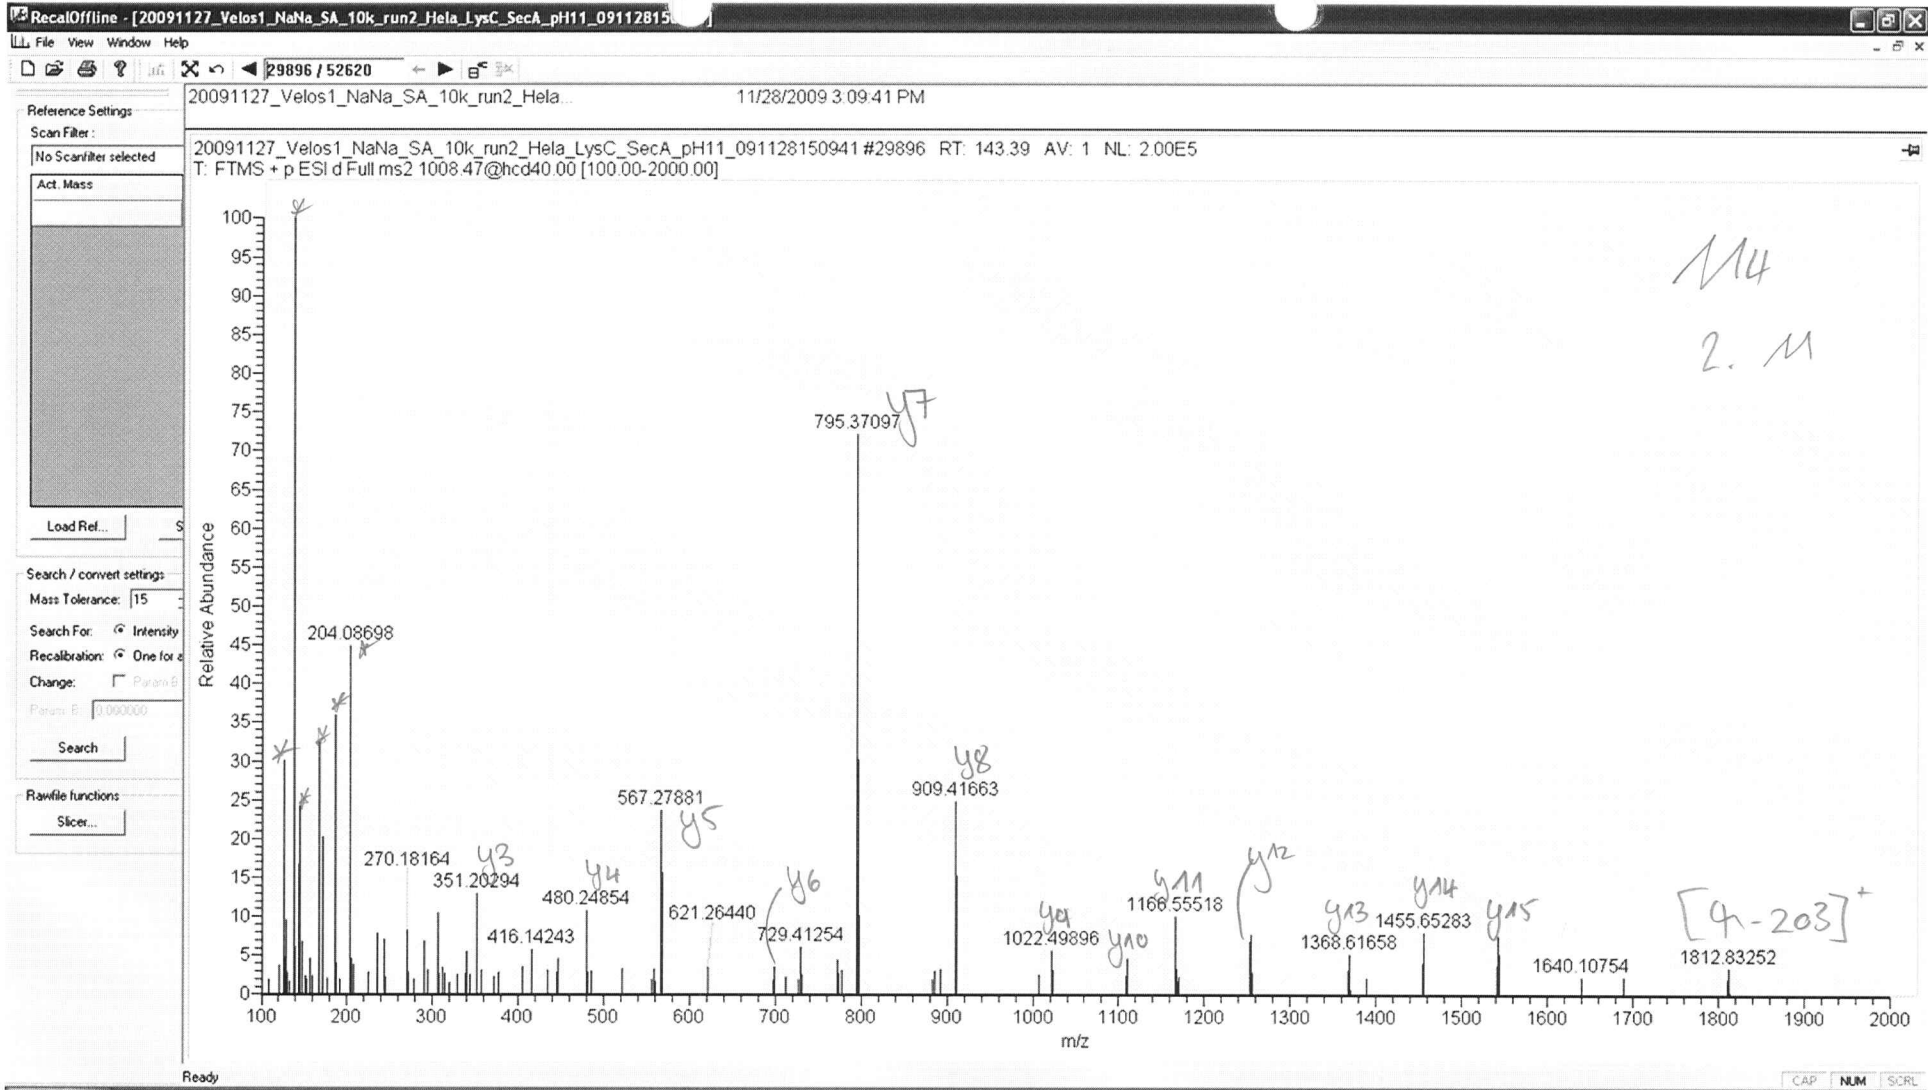

IGVSSDSGSINPMsEGFK

y12 y7

no site evidence

137

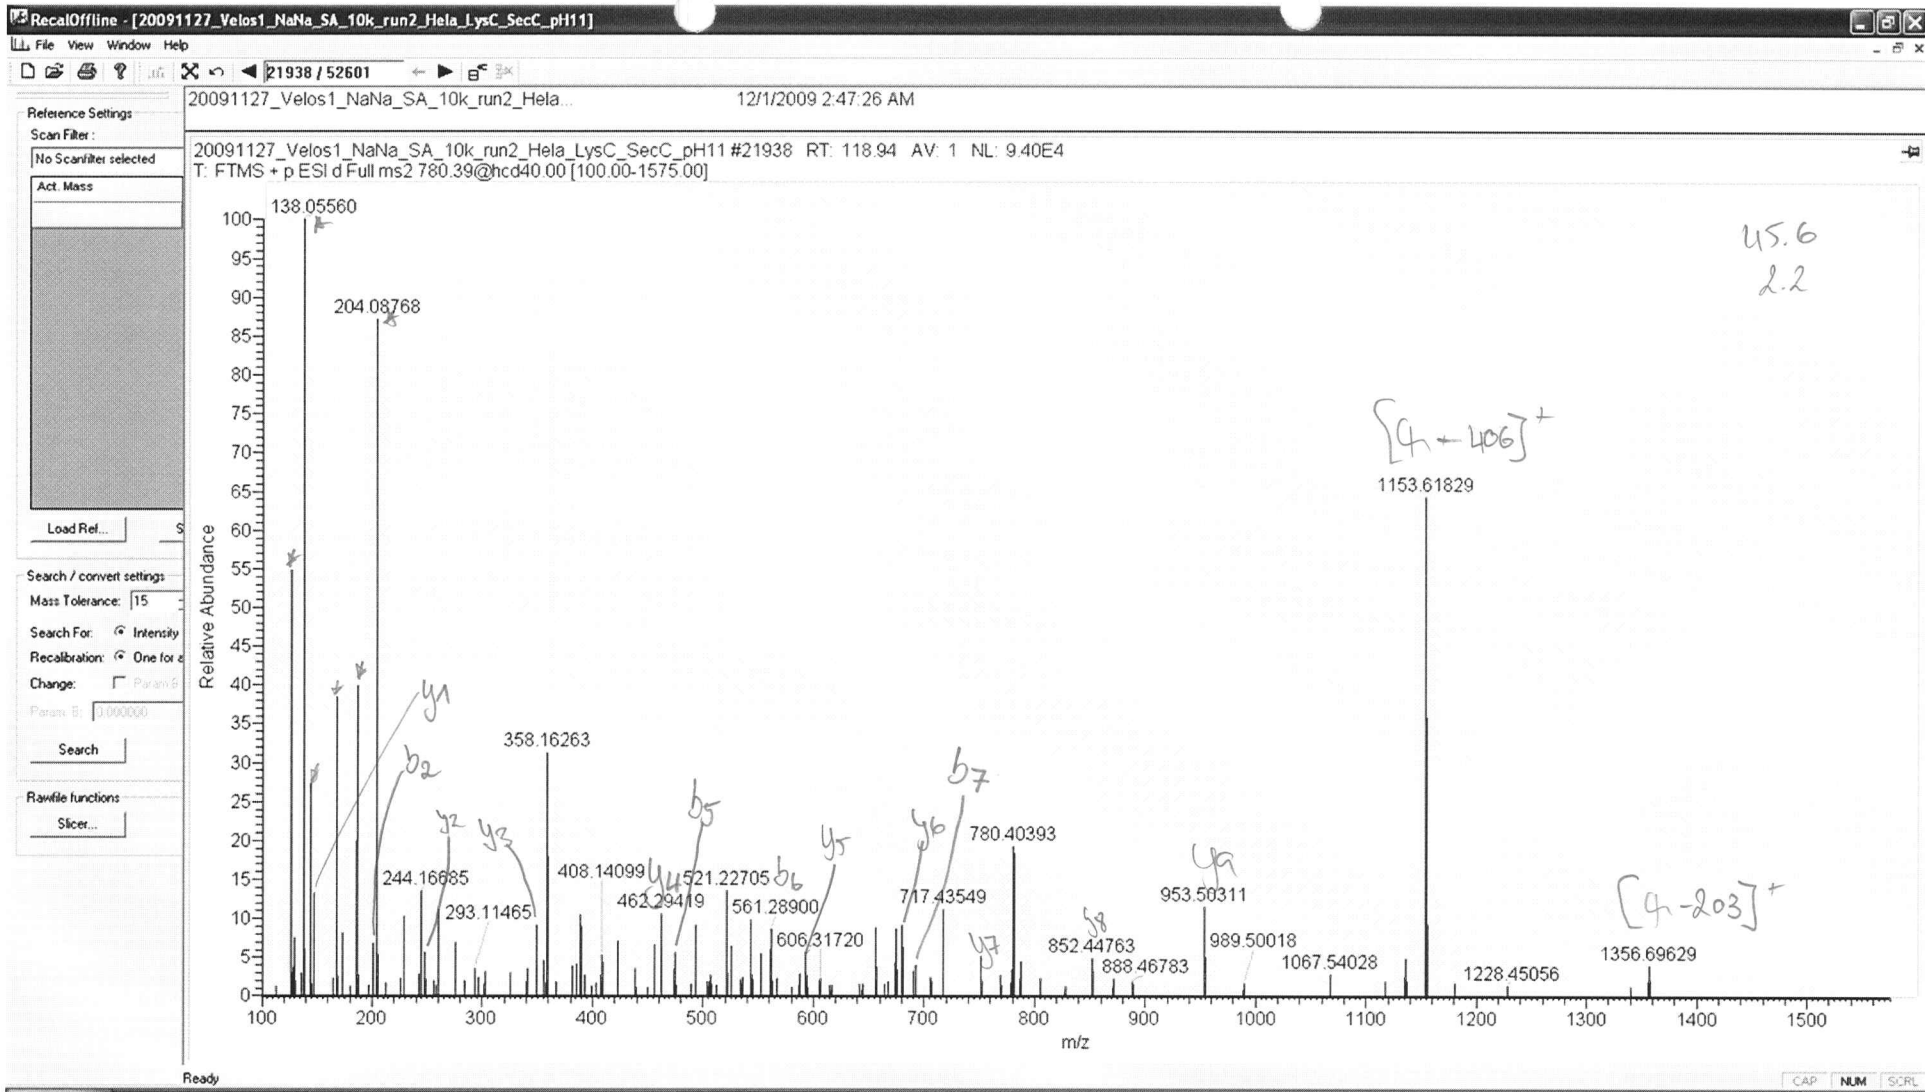

no site evidence

TVTTASMIttK

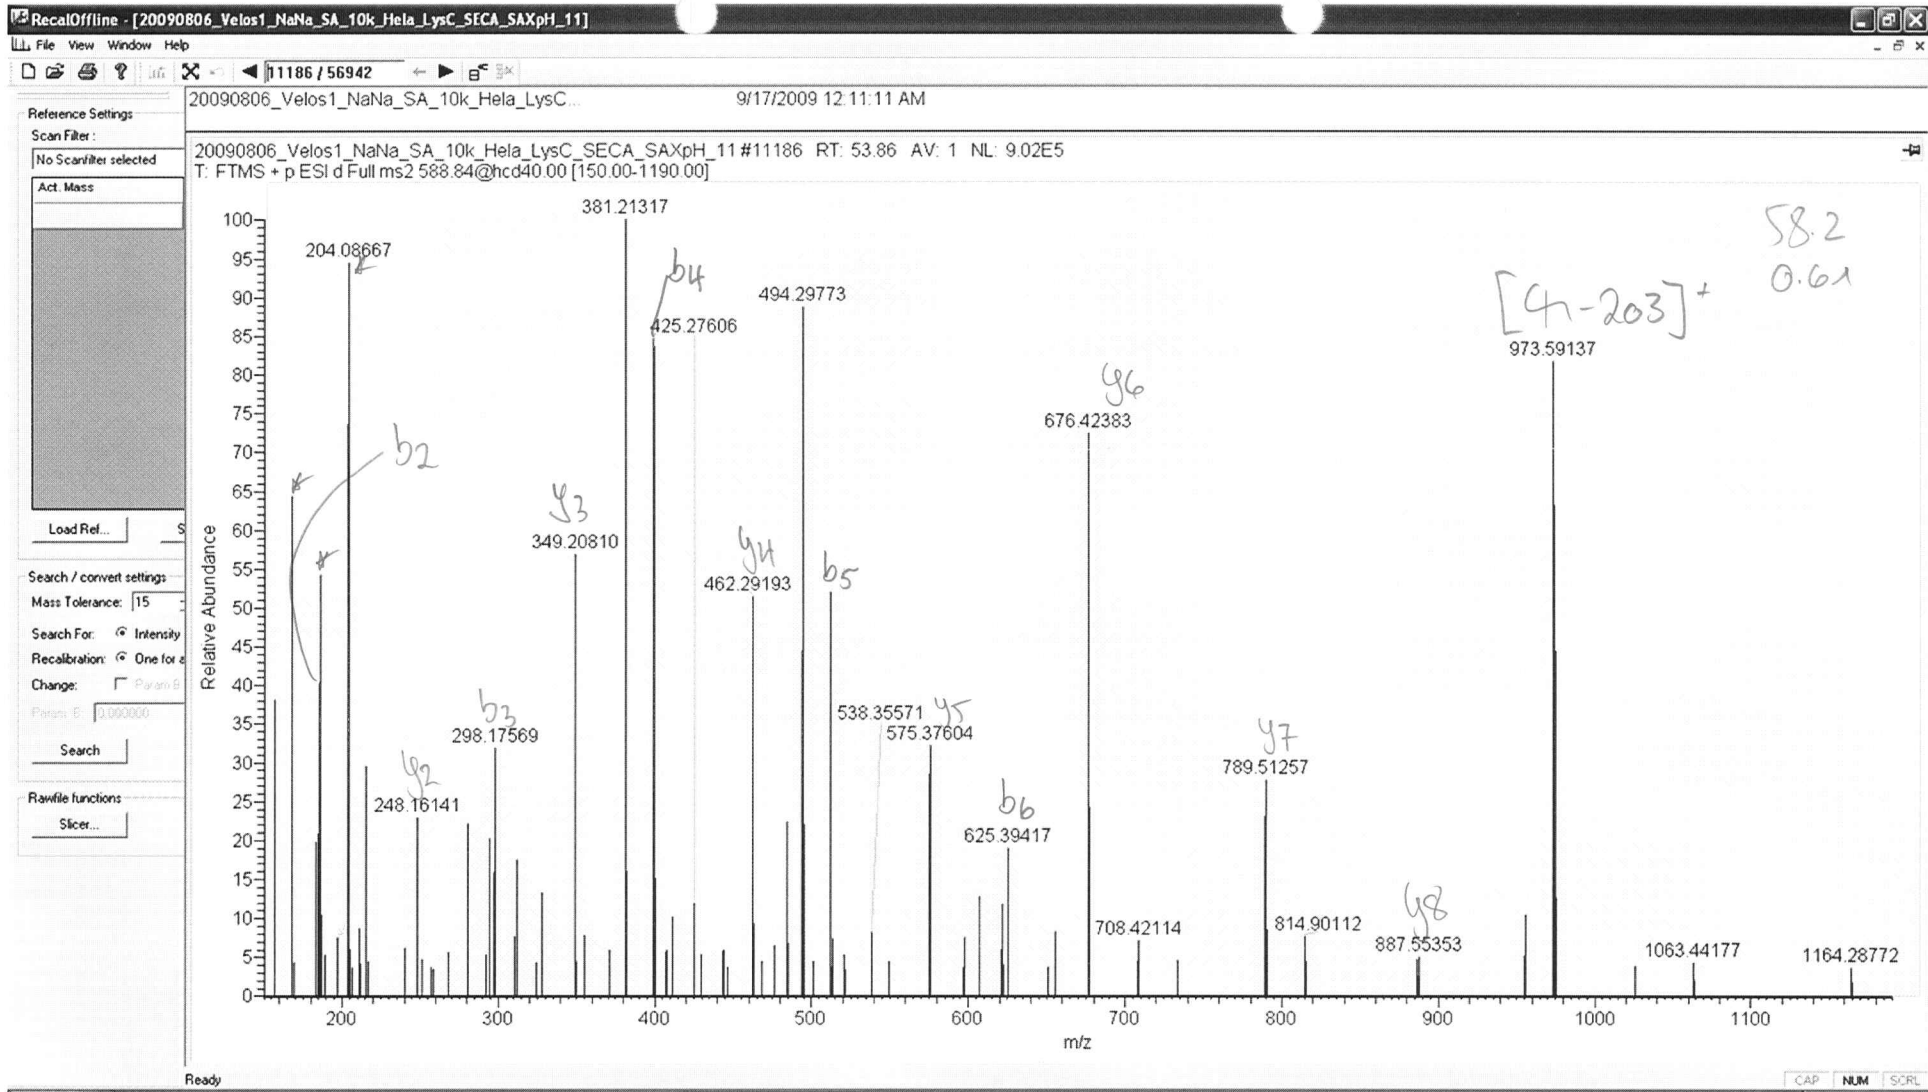

no peak evidence

SPITIIItK

139

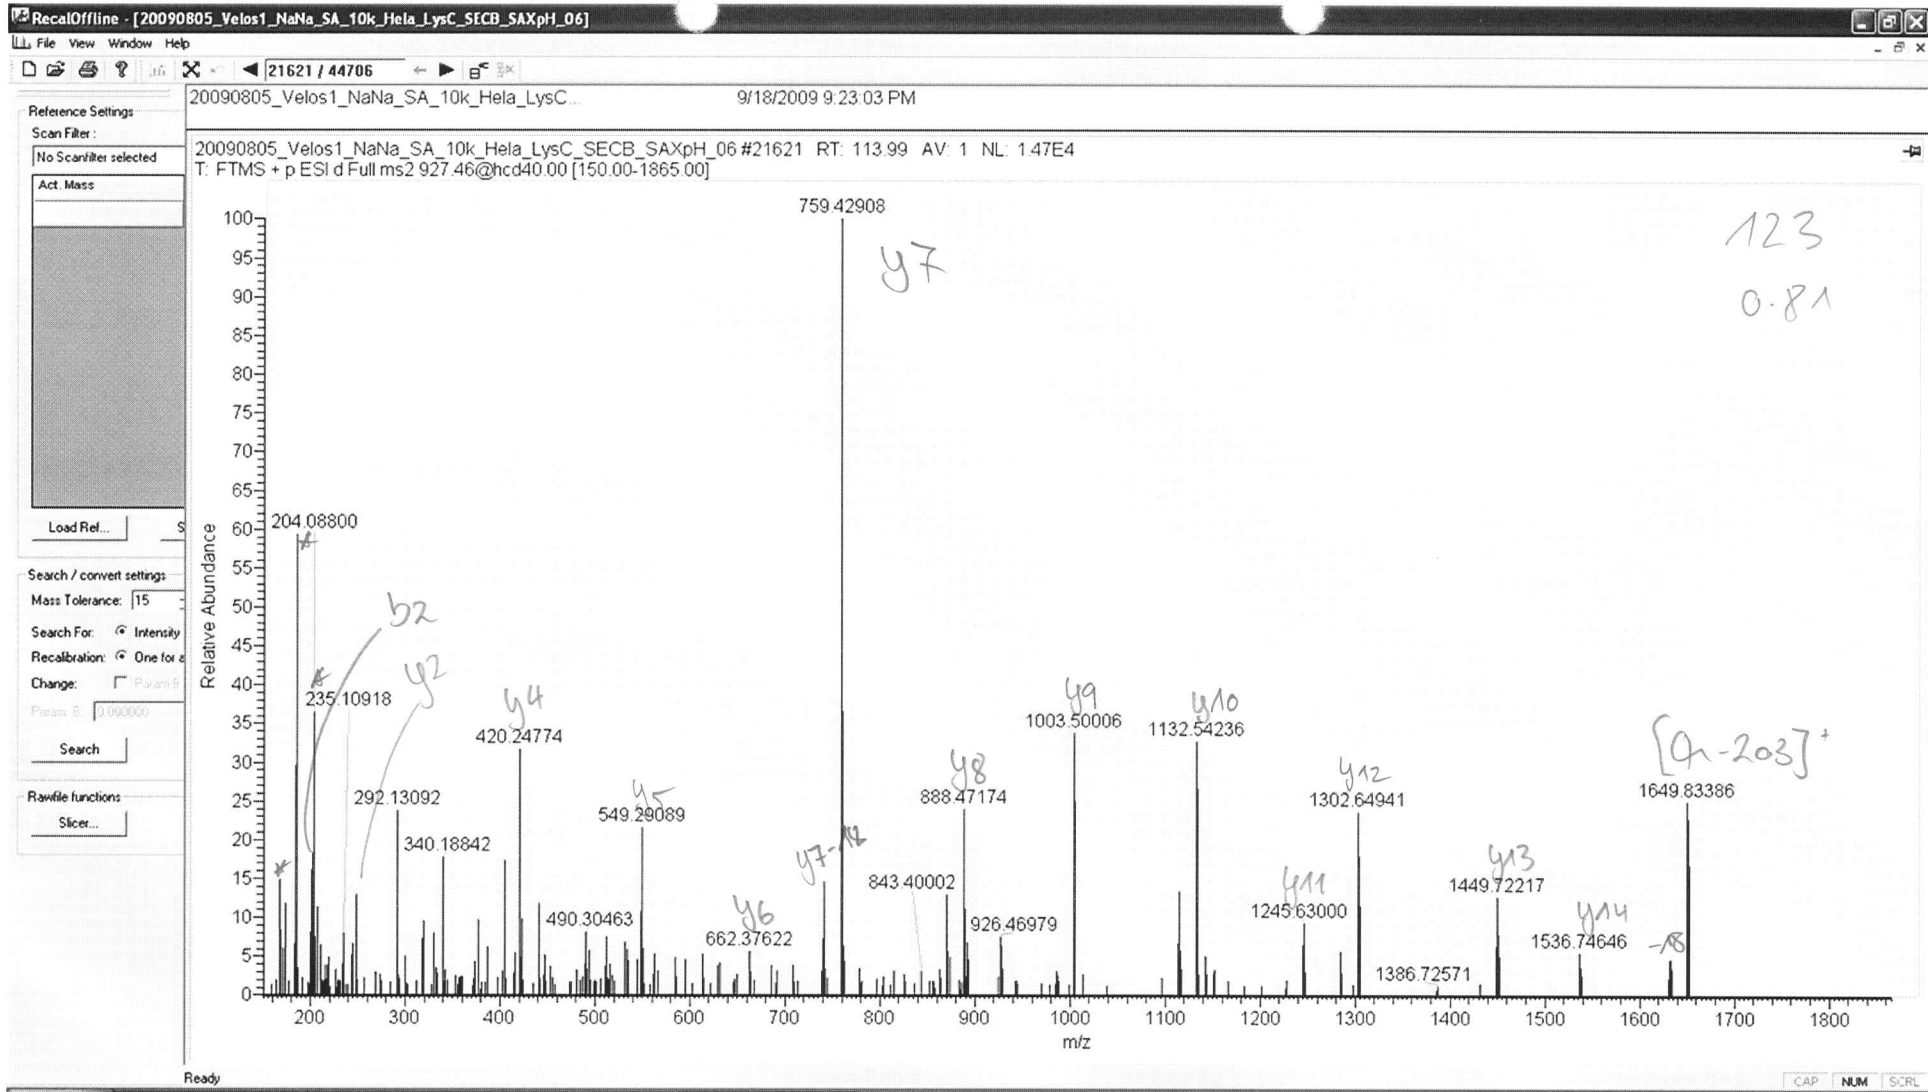

LSFGLEDEPLETAK

y7  
y4  
y2

No bite evidence

110



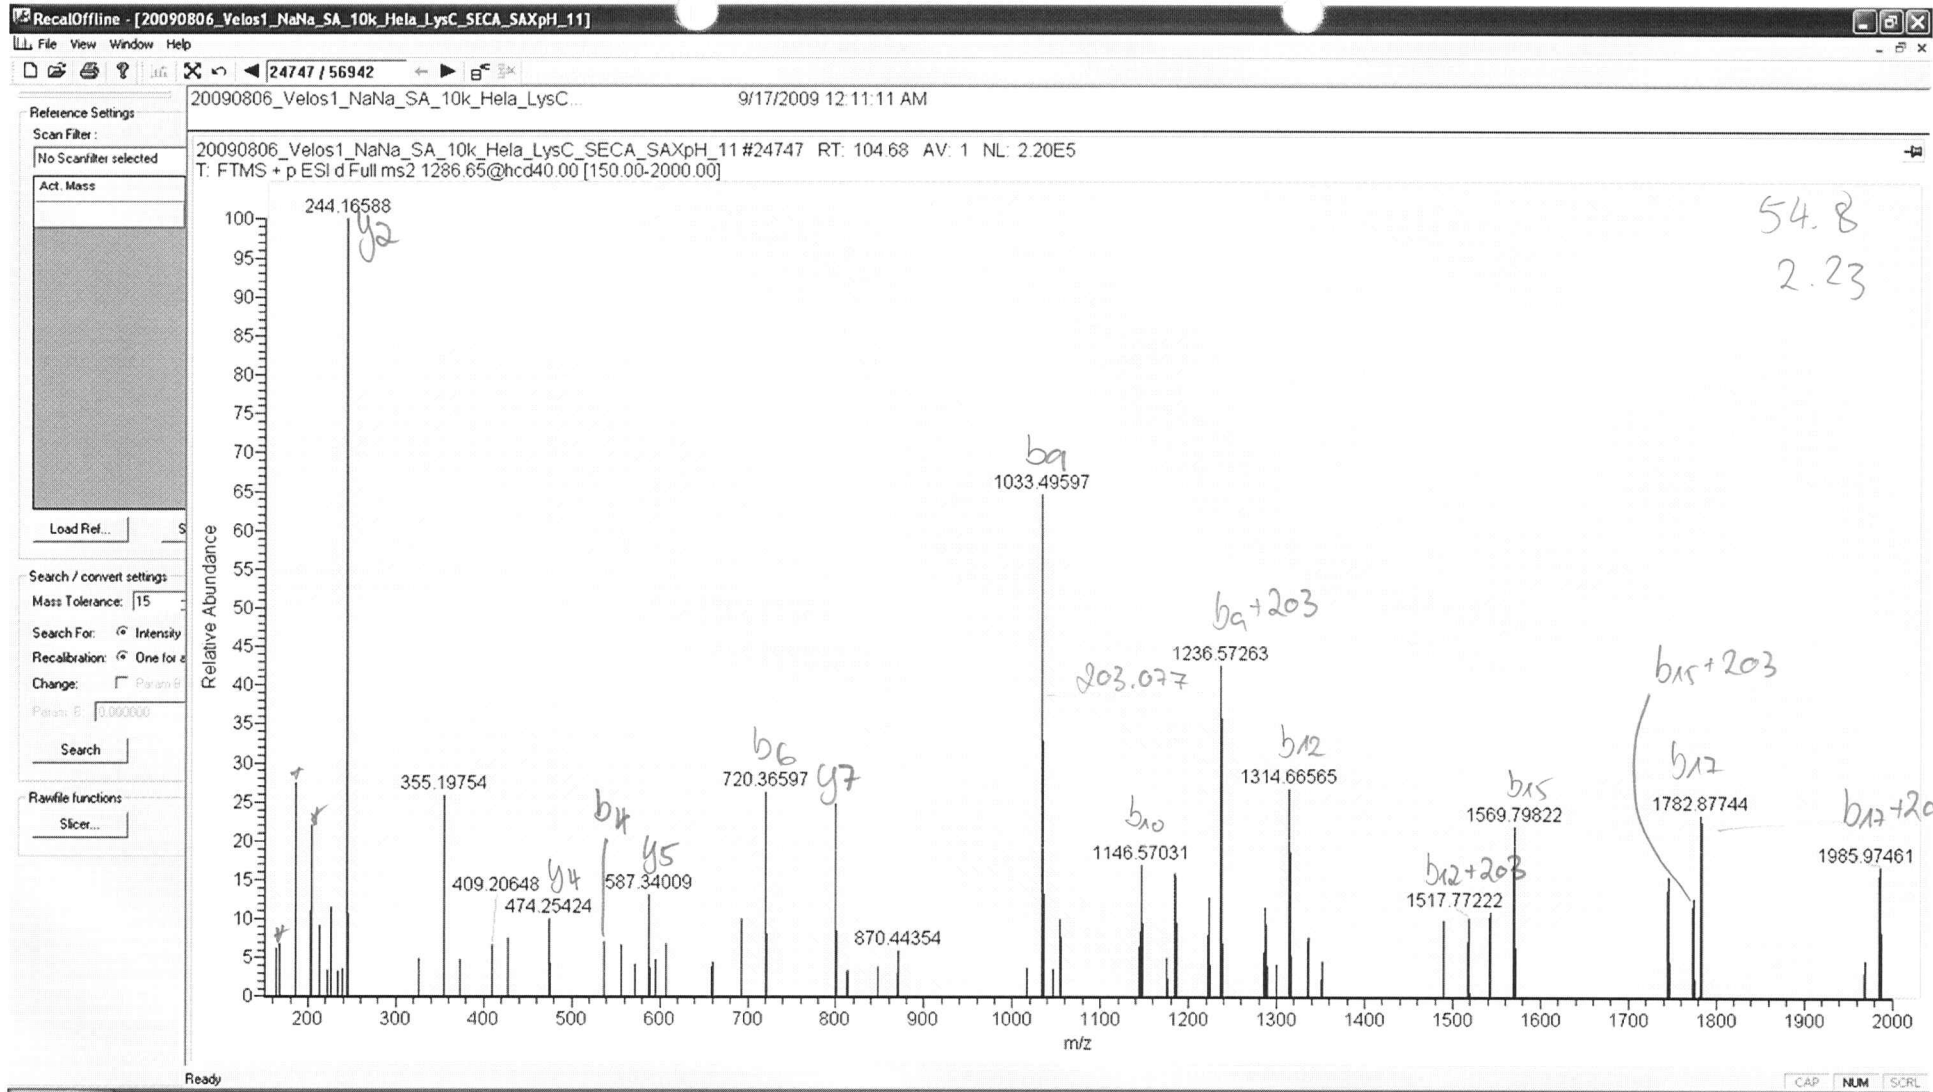

YRSEALPDL PAPSAPDLTEPK

b6 b9 b12 b15 b17

T8

141



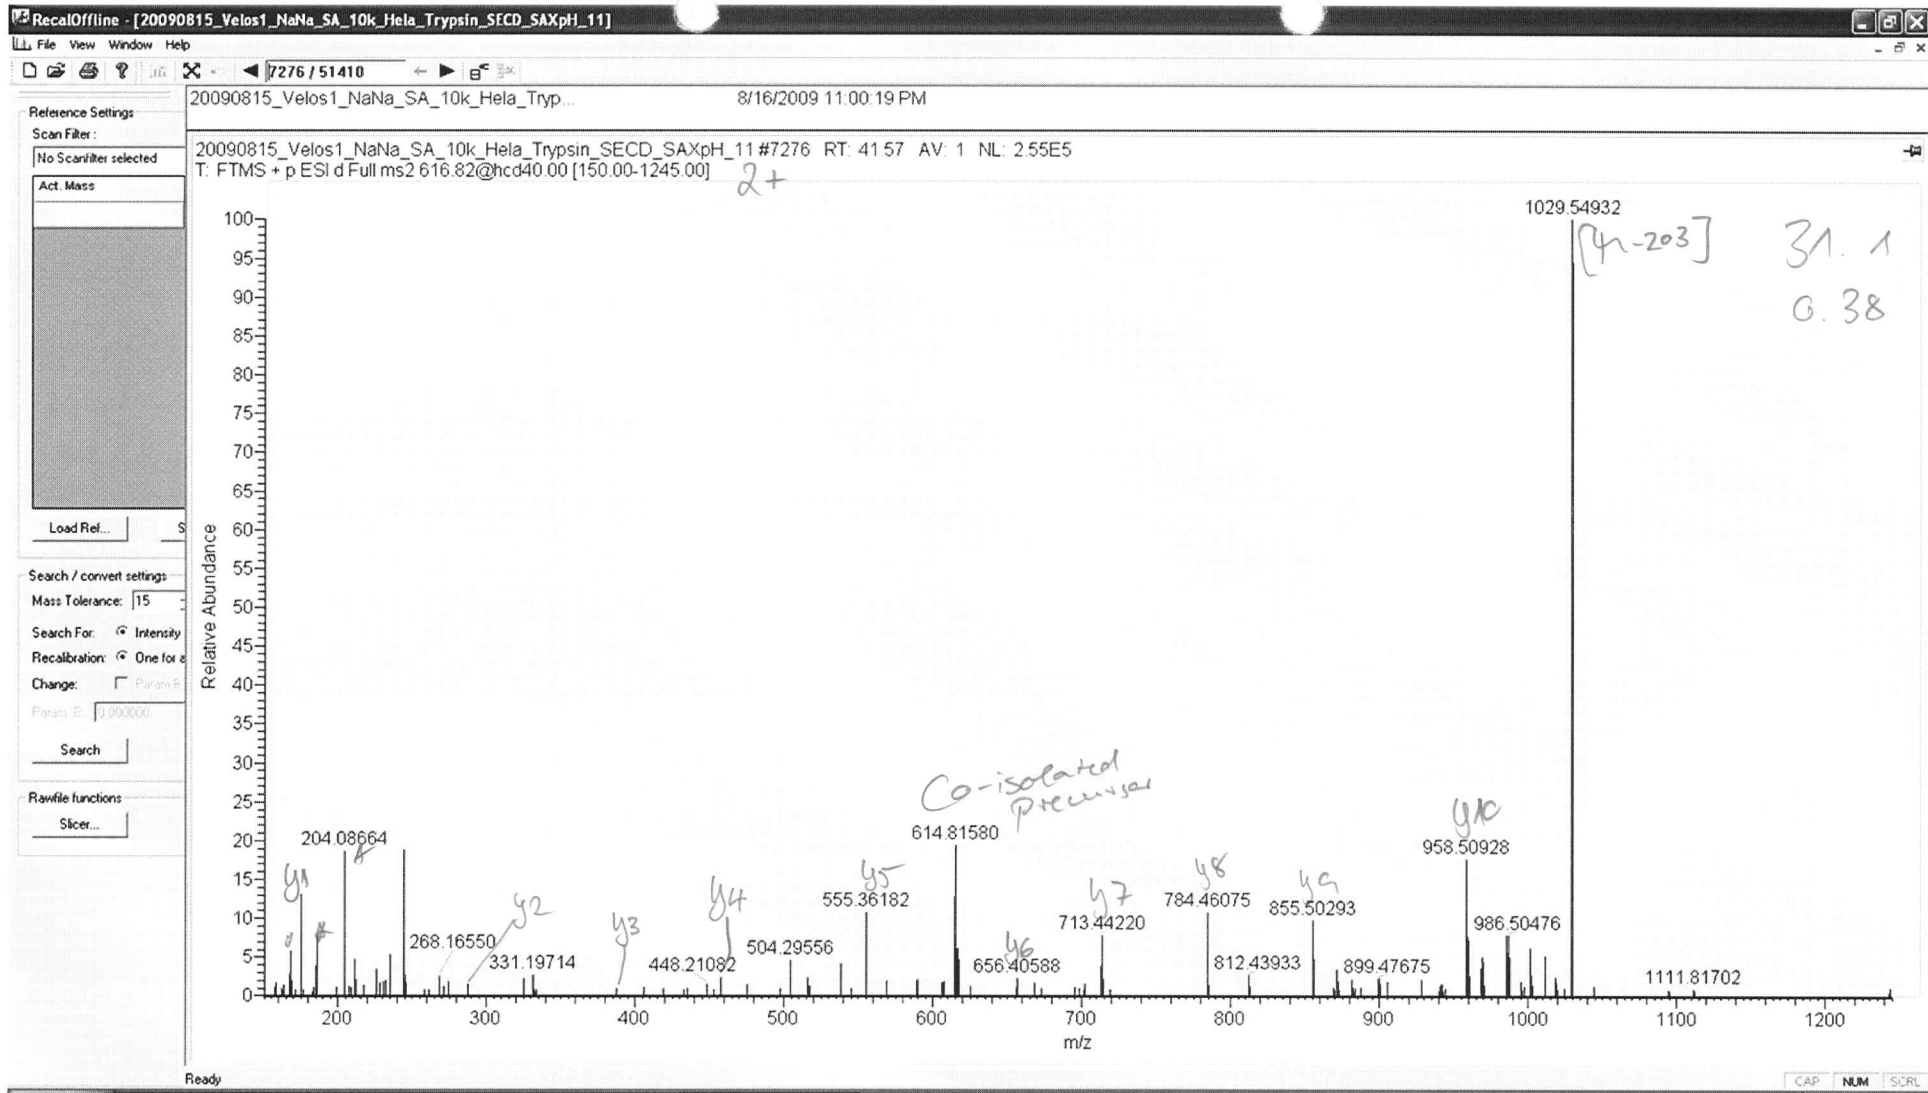

T6

ACAAGtPAVIR  
≈

143

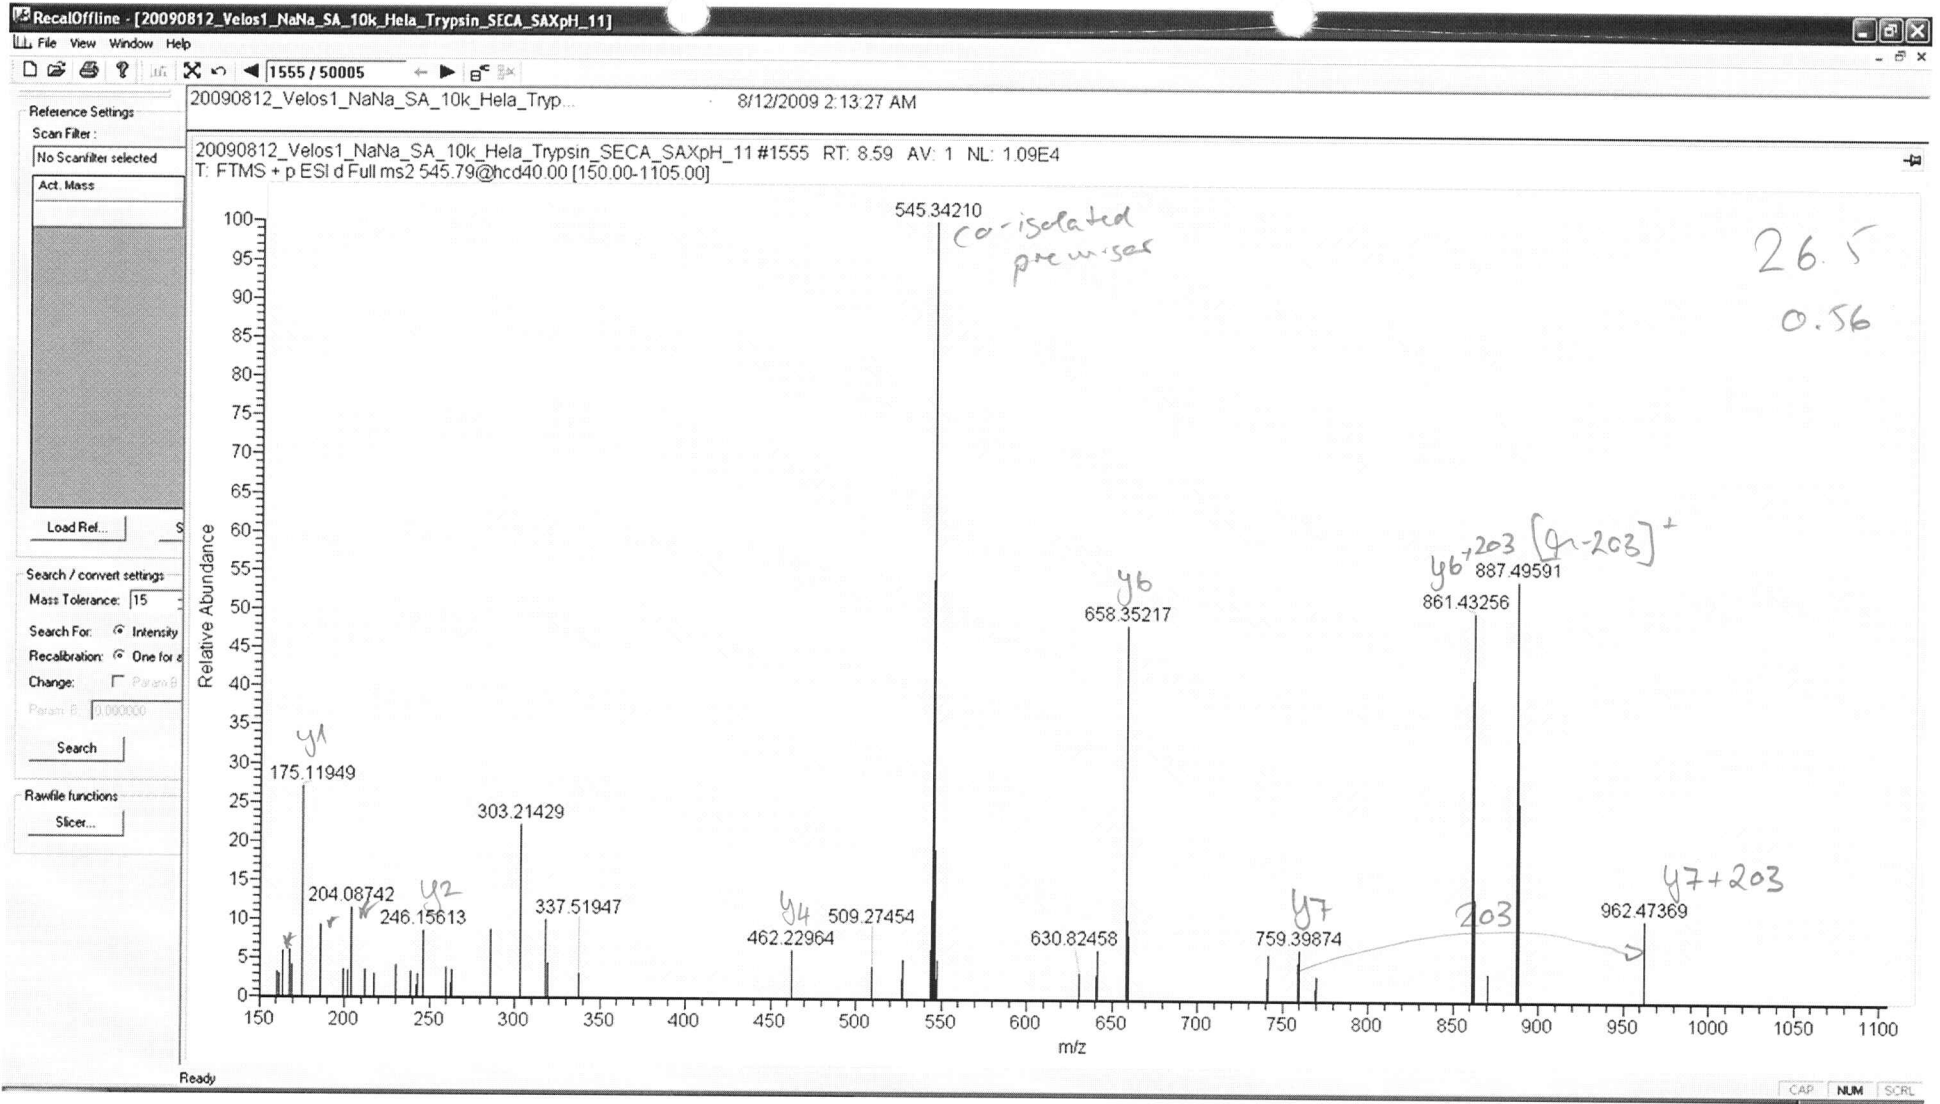

$y_6$   
KTPVSEAR

144



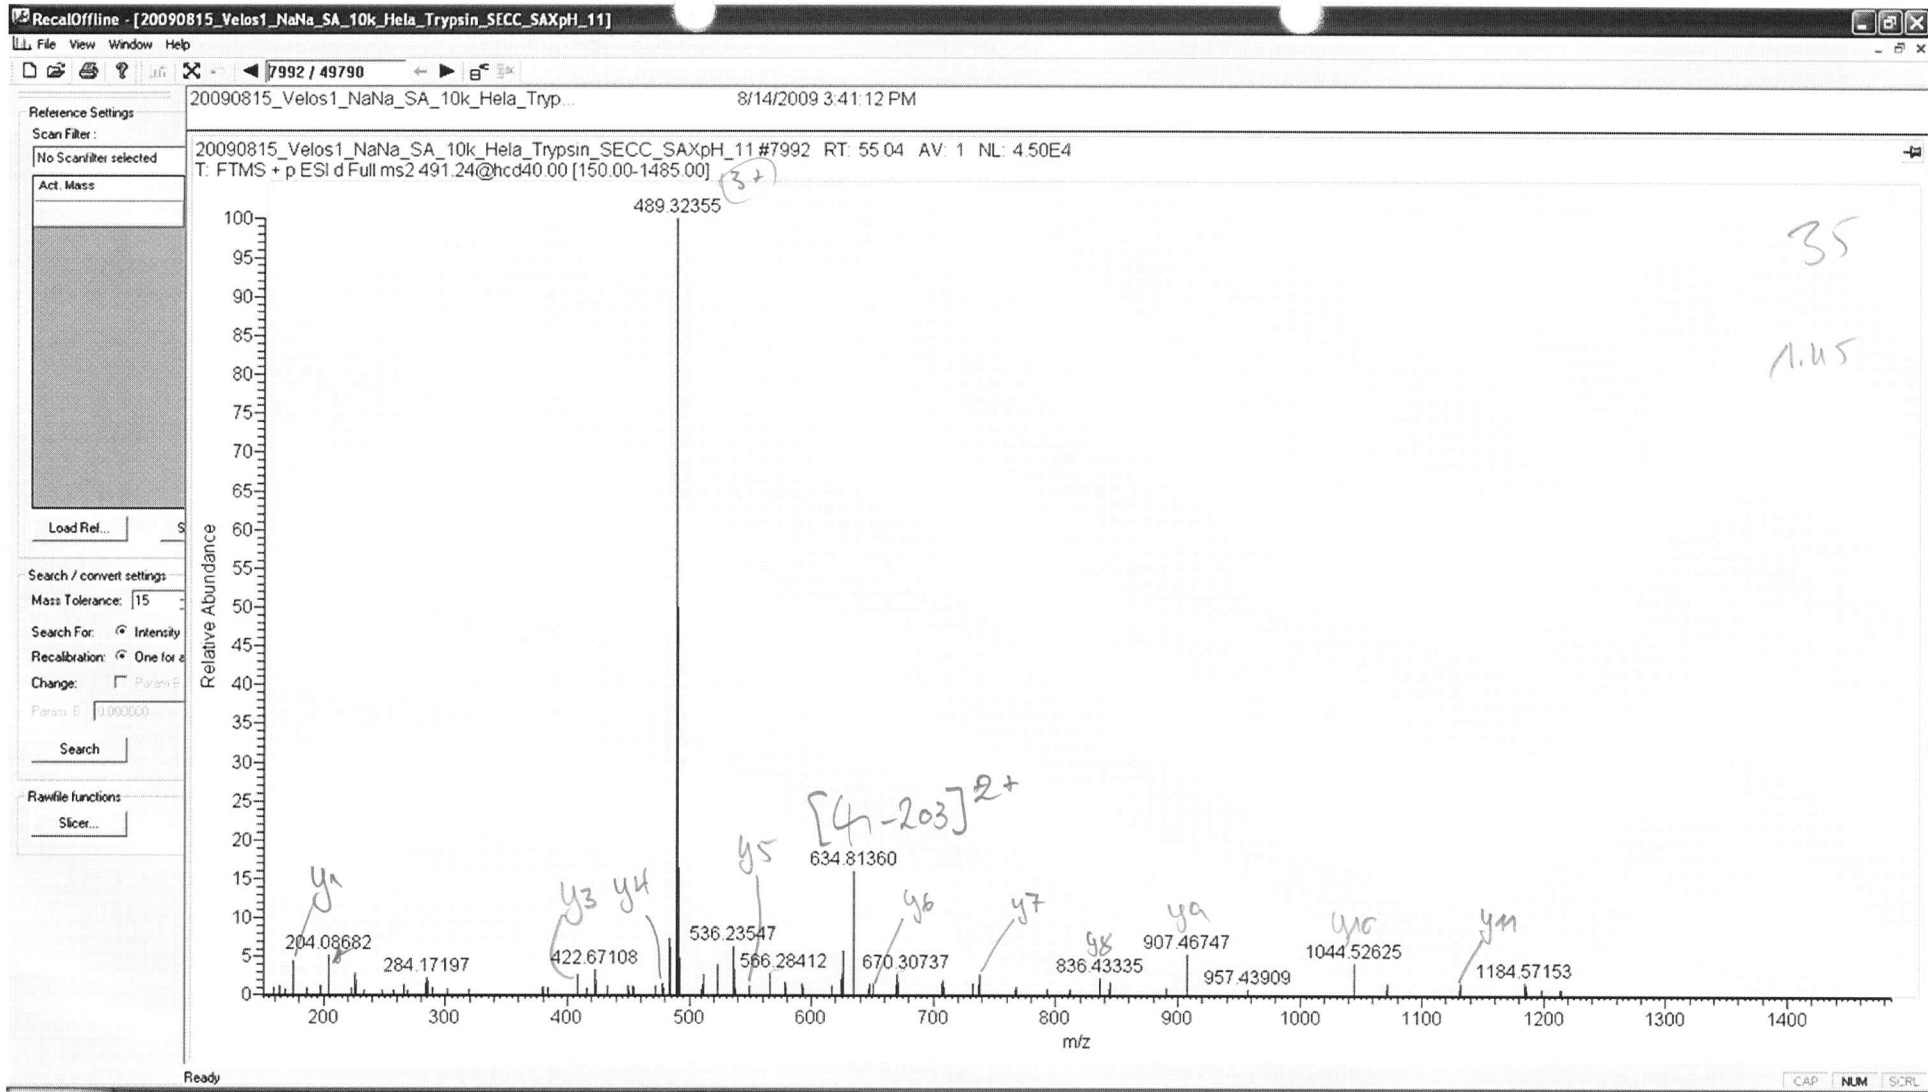

no site evidence

HSHAVSTAAMtR

146

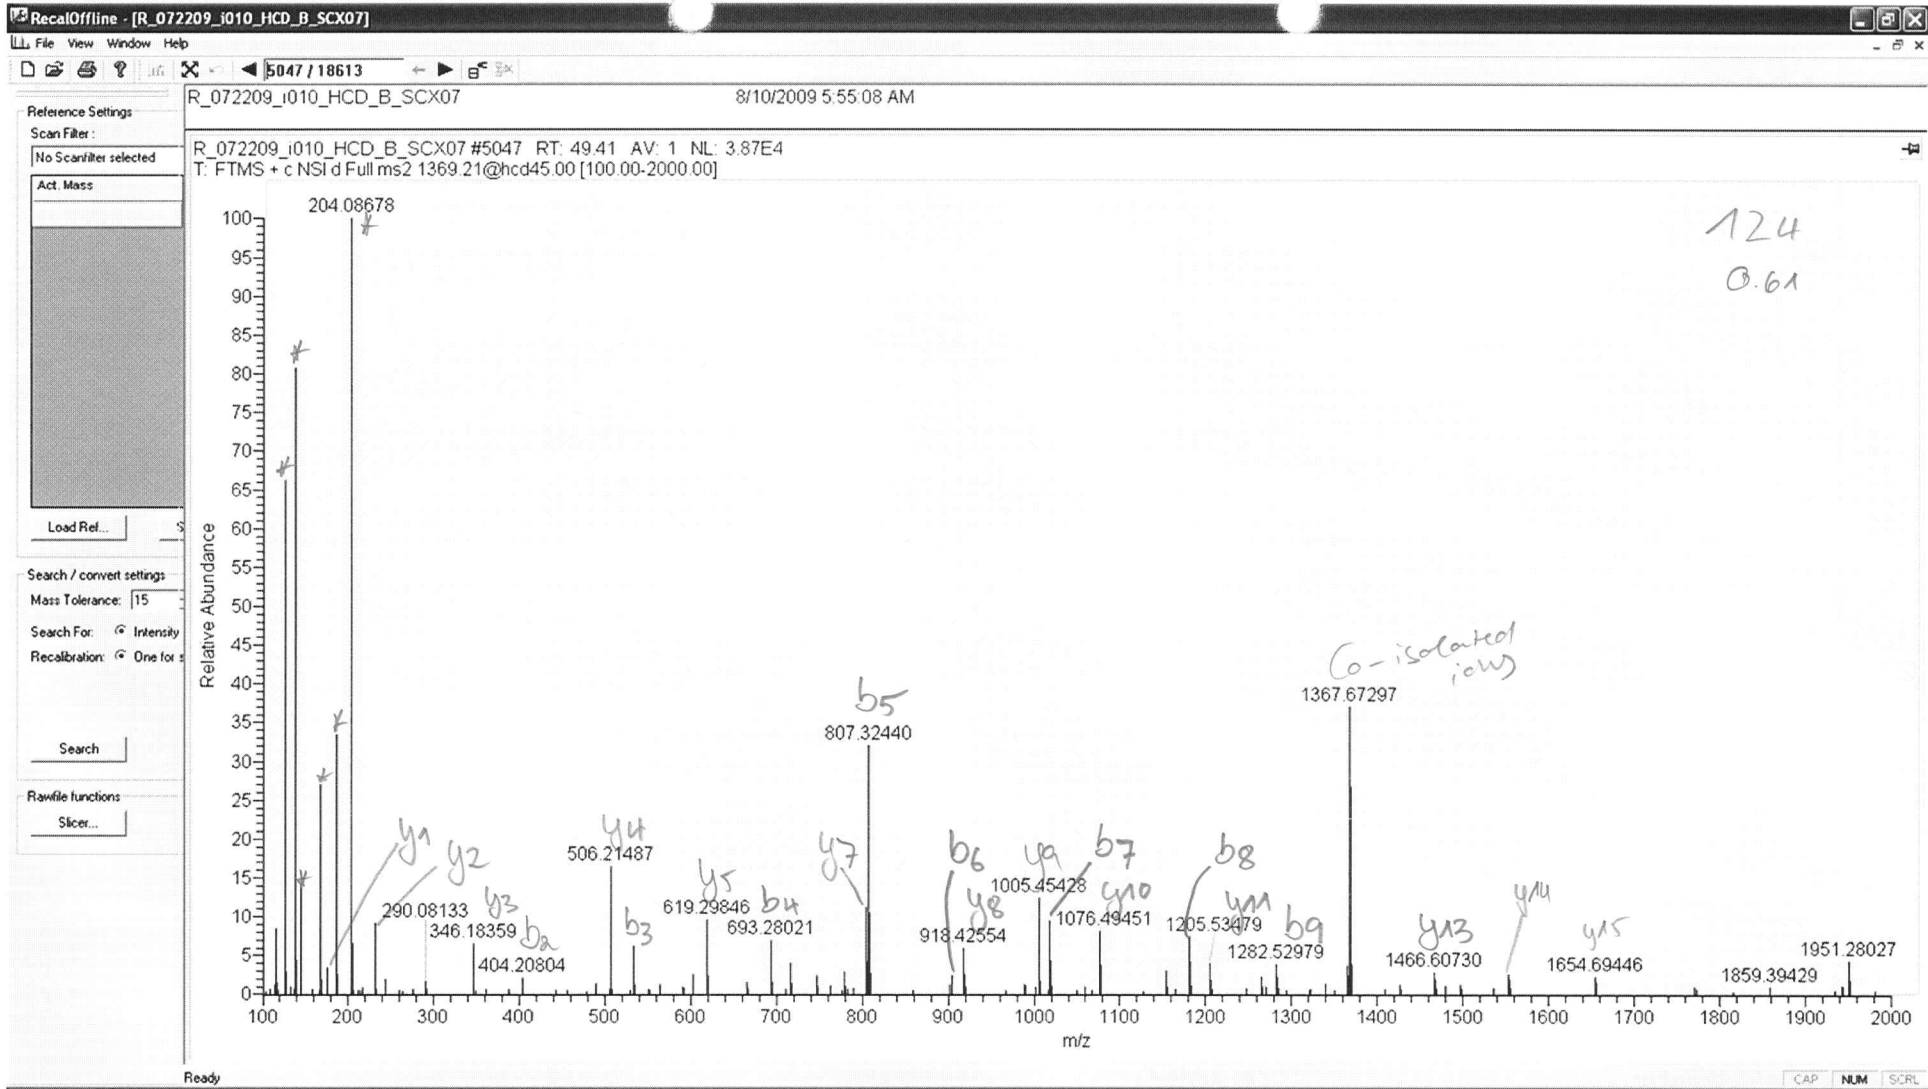

No site evidence  
N-terminal: iTRAG 4plex

vcEcNPNYTGSAcDcSLDTSTcEASNGQIcNGR

148

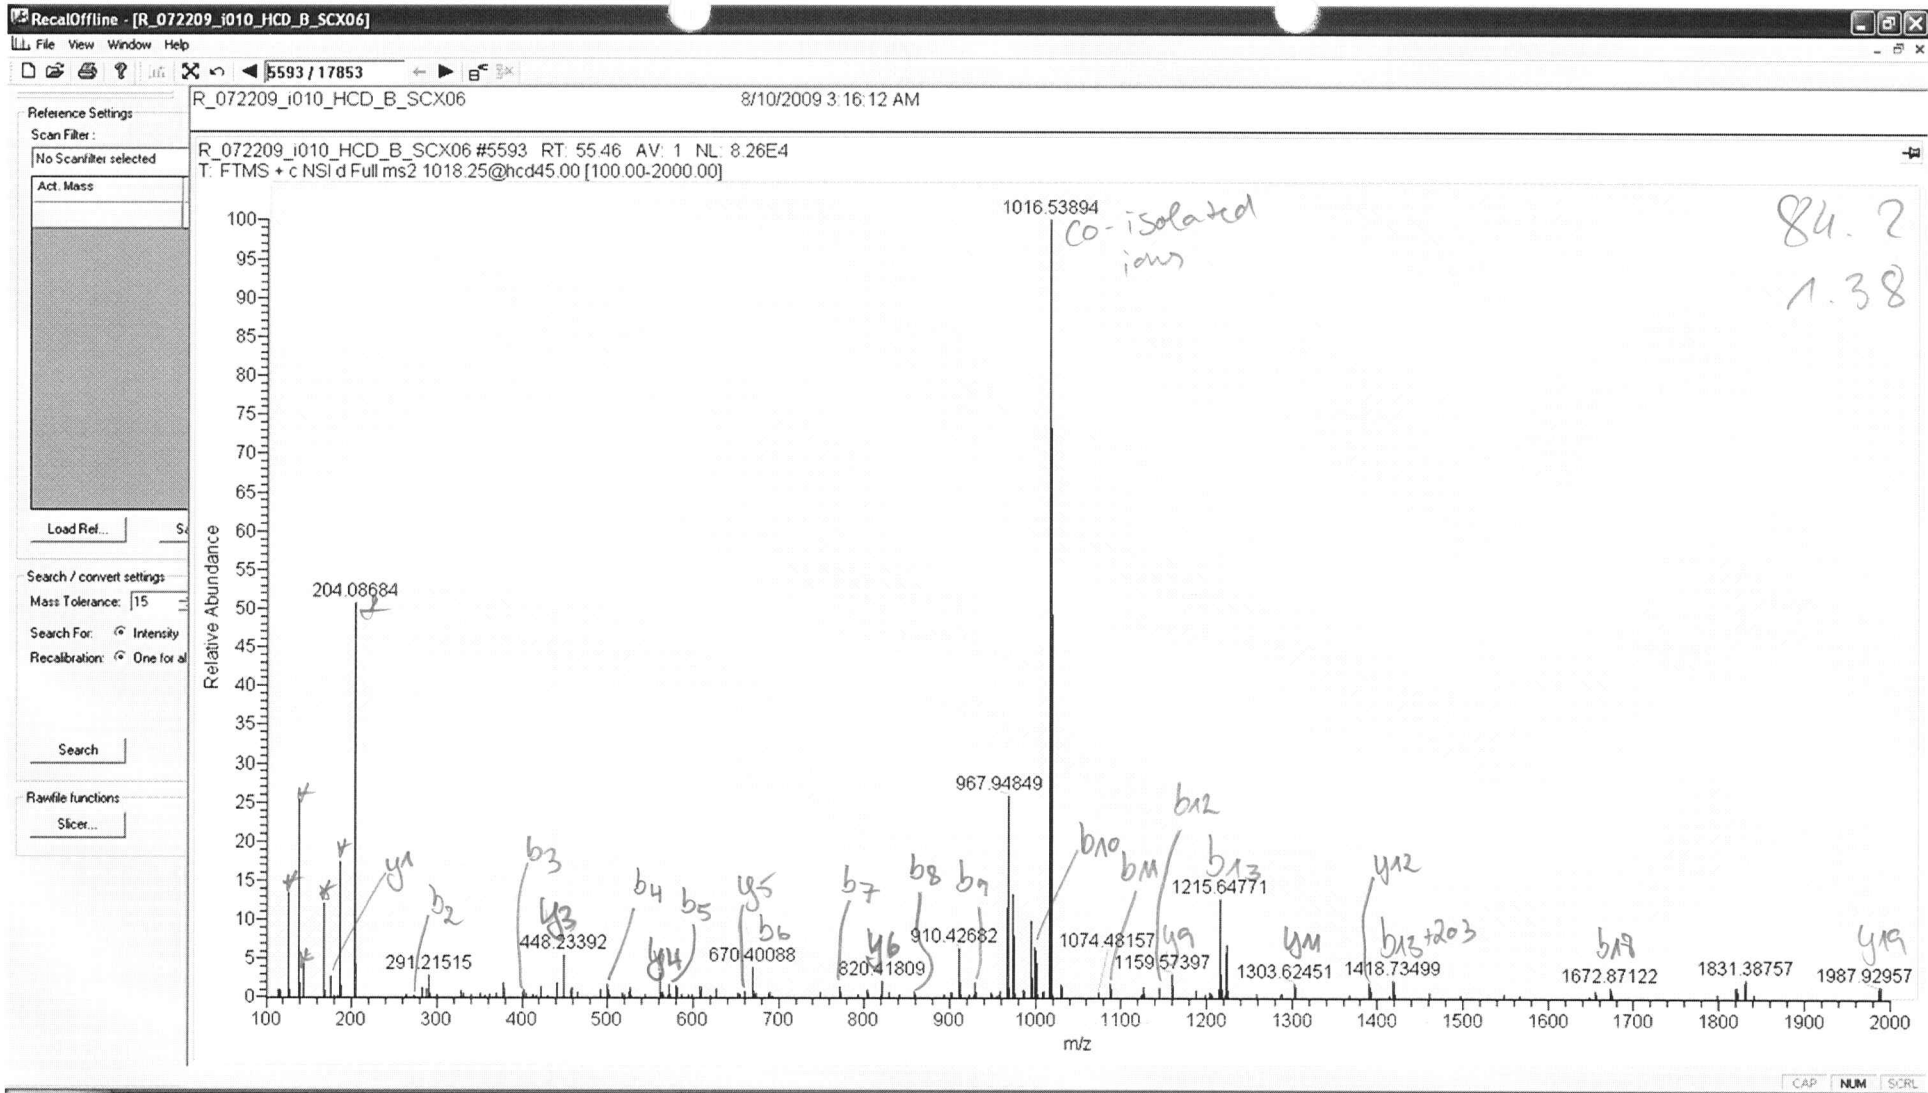



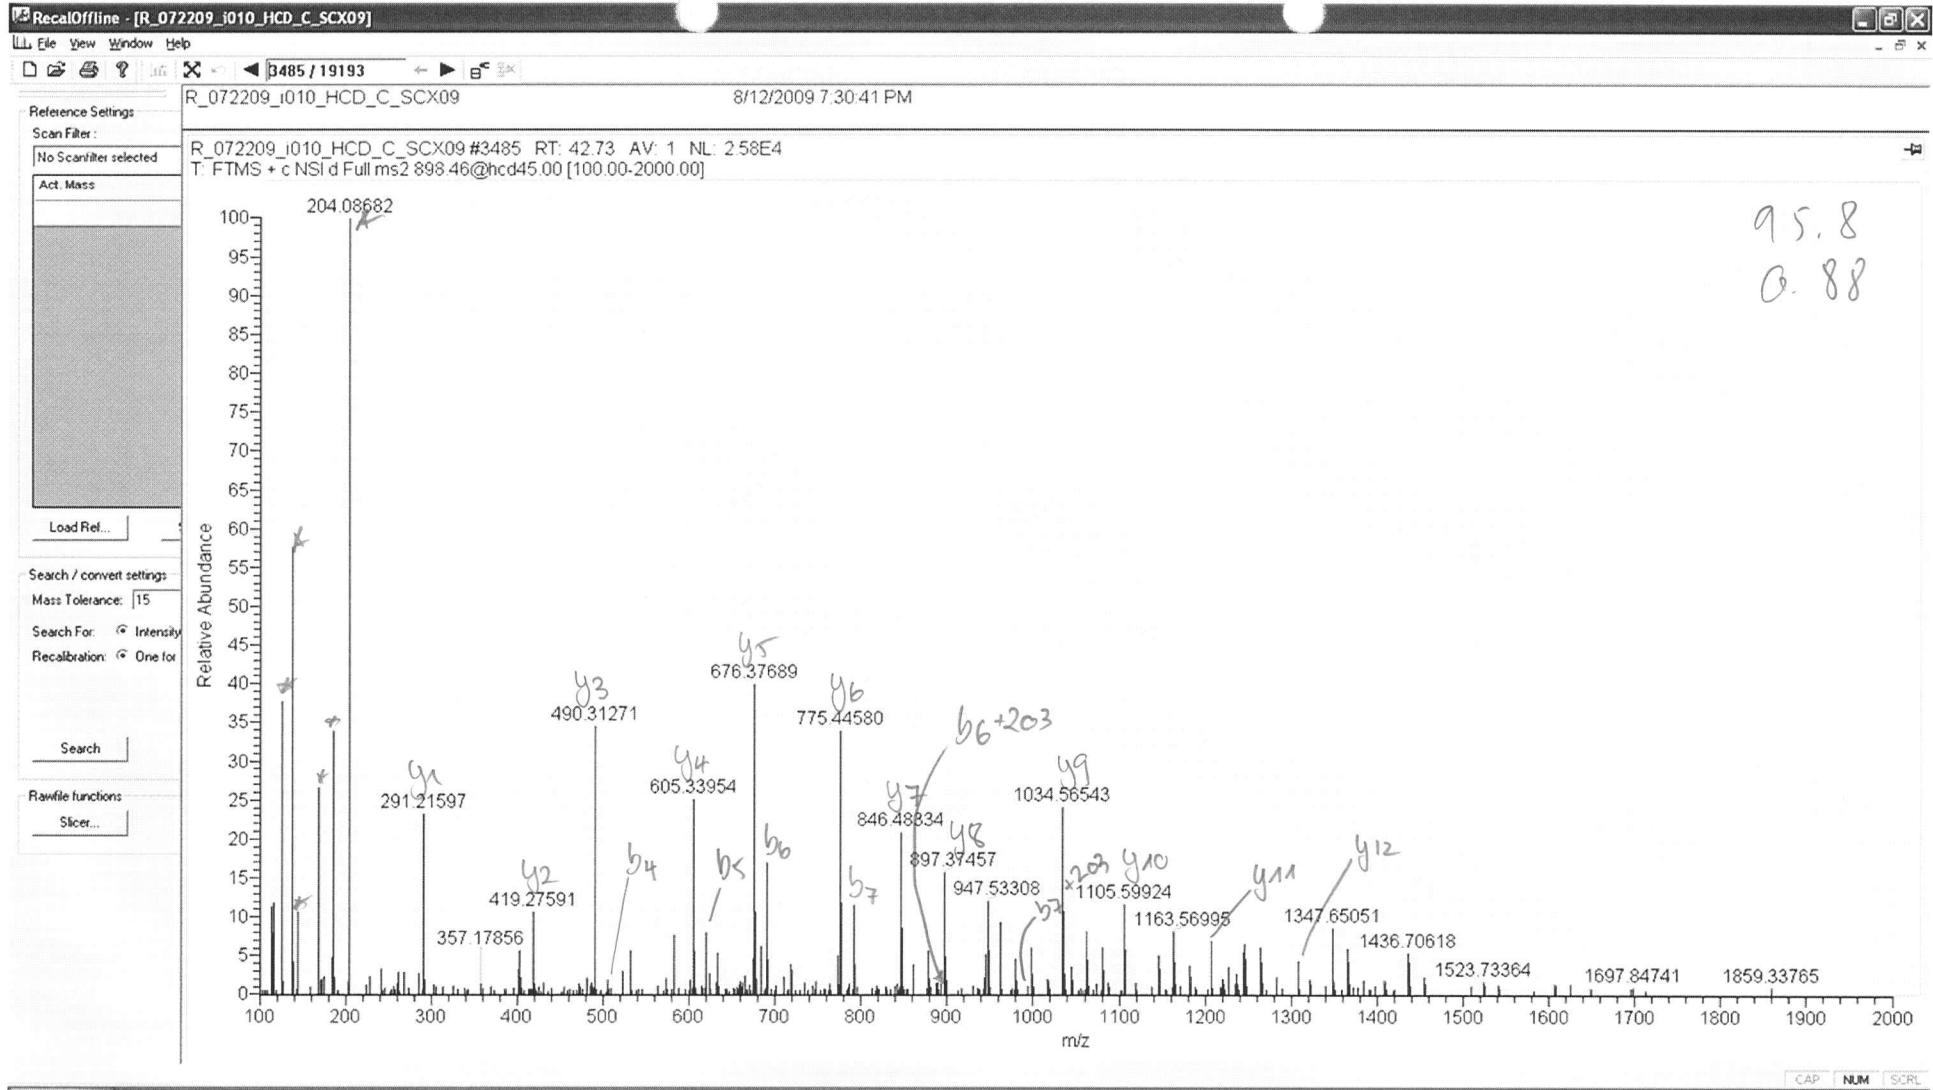

gTTT<sup>y9</sup>NAT<sup>y8</sup>stTTTTASTAVADAQk

b6  
b7

No site evidence

N-terminus + k23:  
iTRAQ 4plex

152

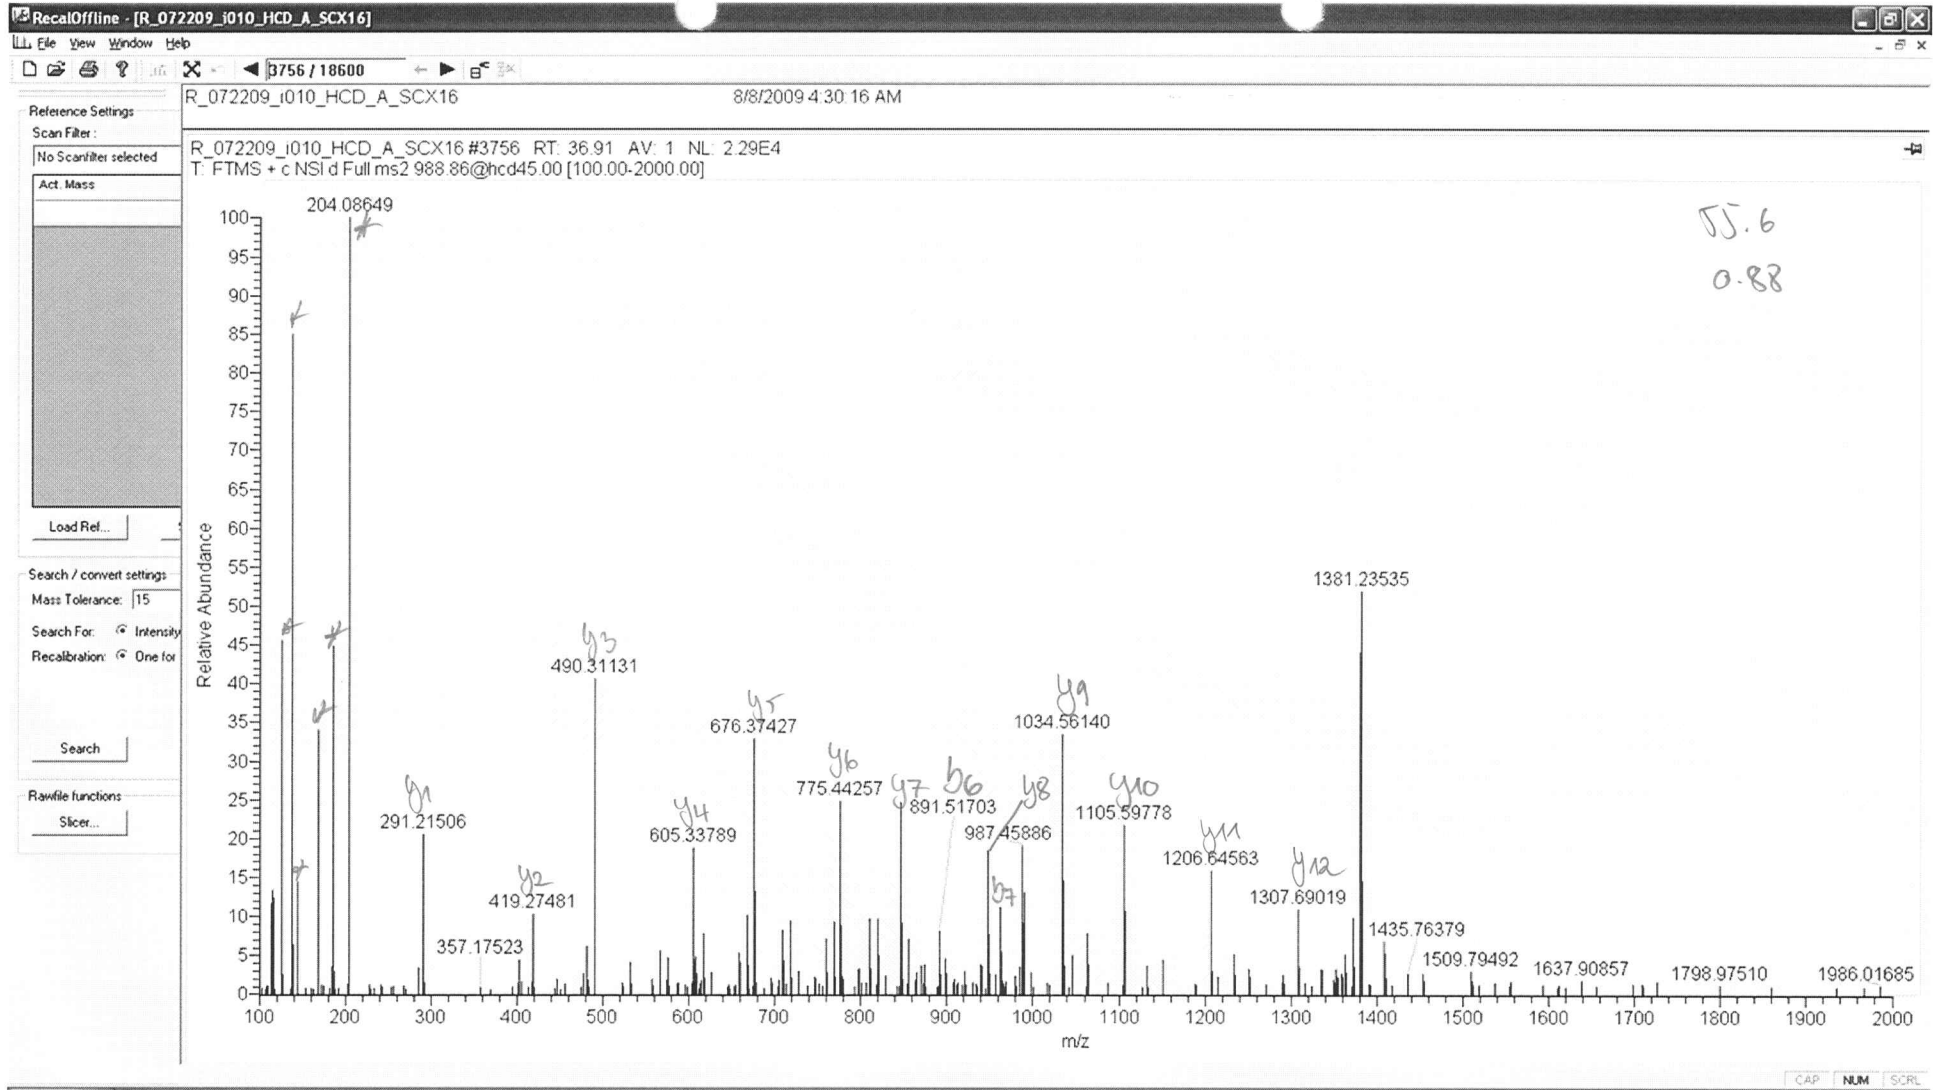

KGTTT**N**ATSTTTTTASTAVADAQK

b6

no site evidence  
N-term, K1, K24: ;TRAG4plex

153





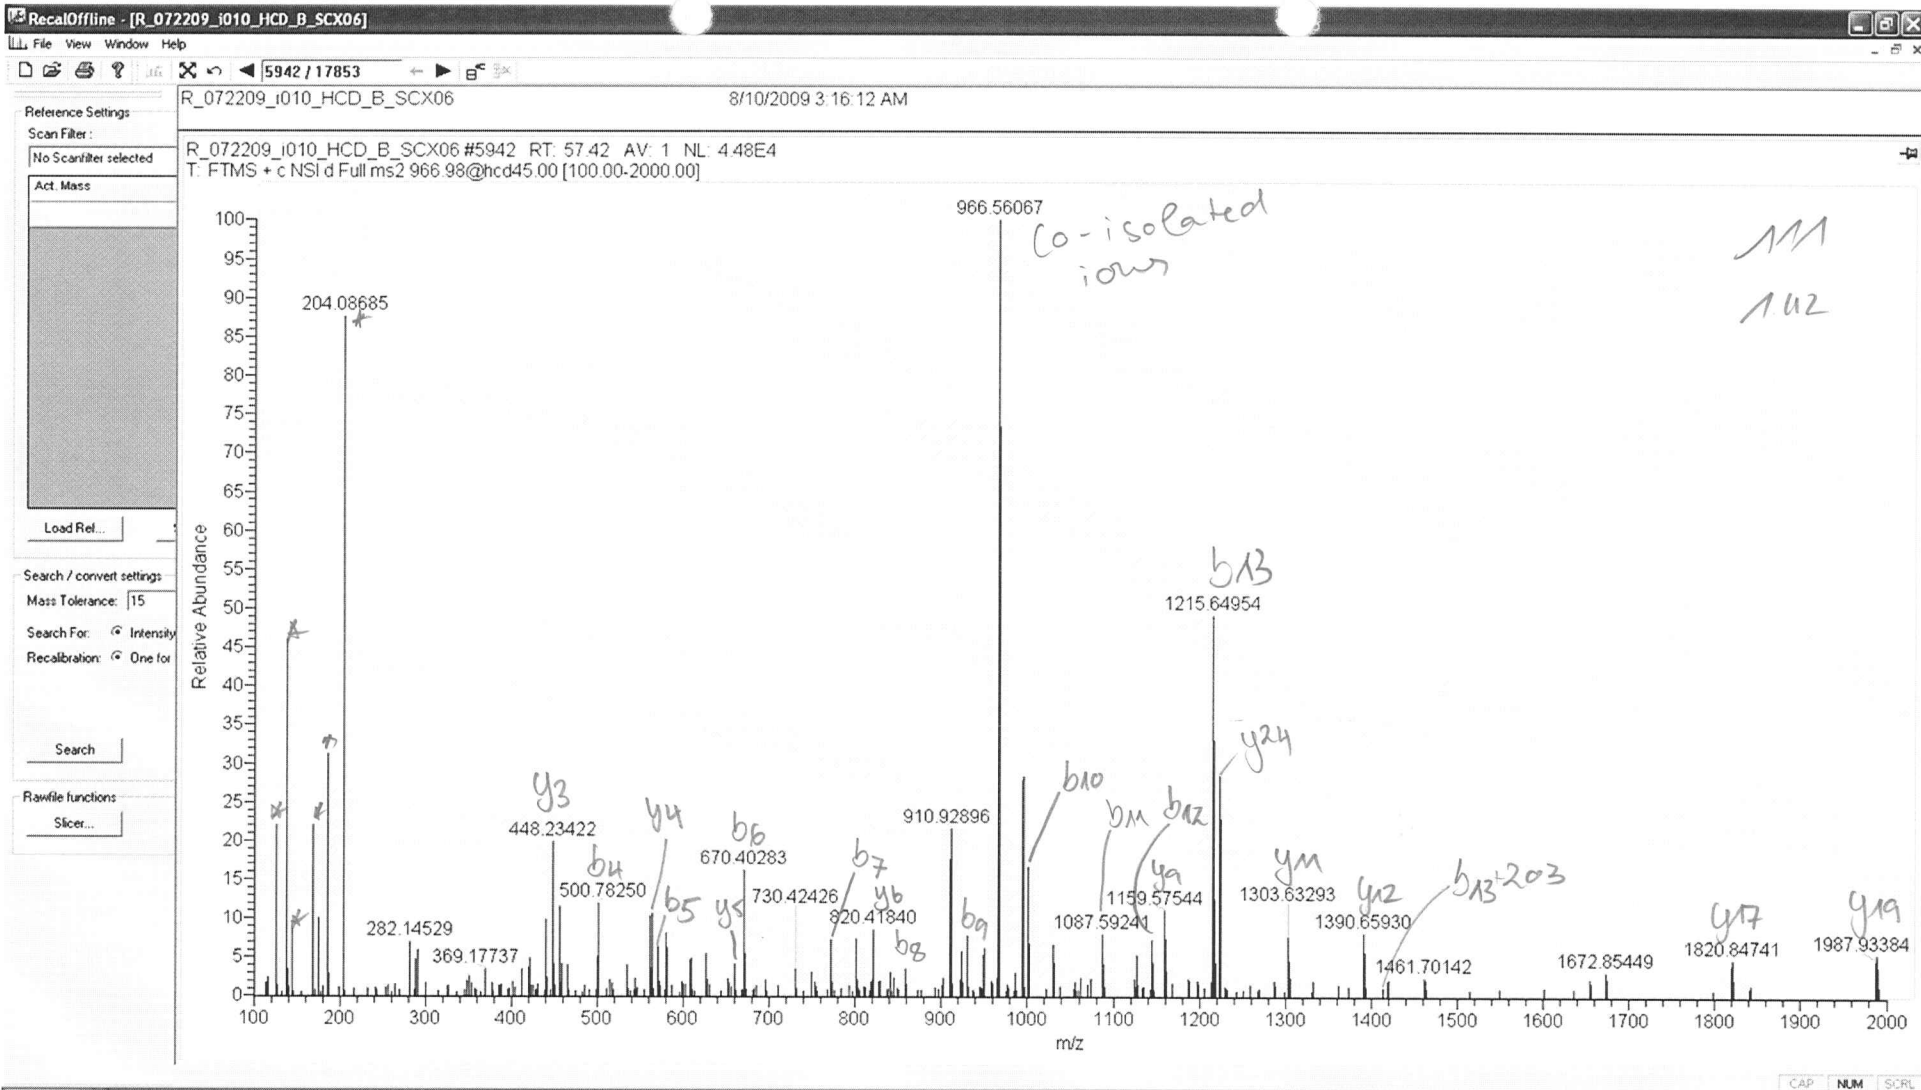

qGAVAVTSAASGAPTTAPAPSSSASSGPnQcVlCLR

y24

b11 b13

T7, S8, SM

N-term. iTRAQ4plex

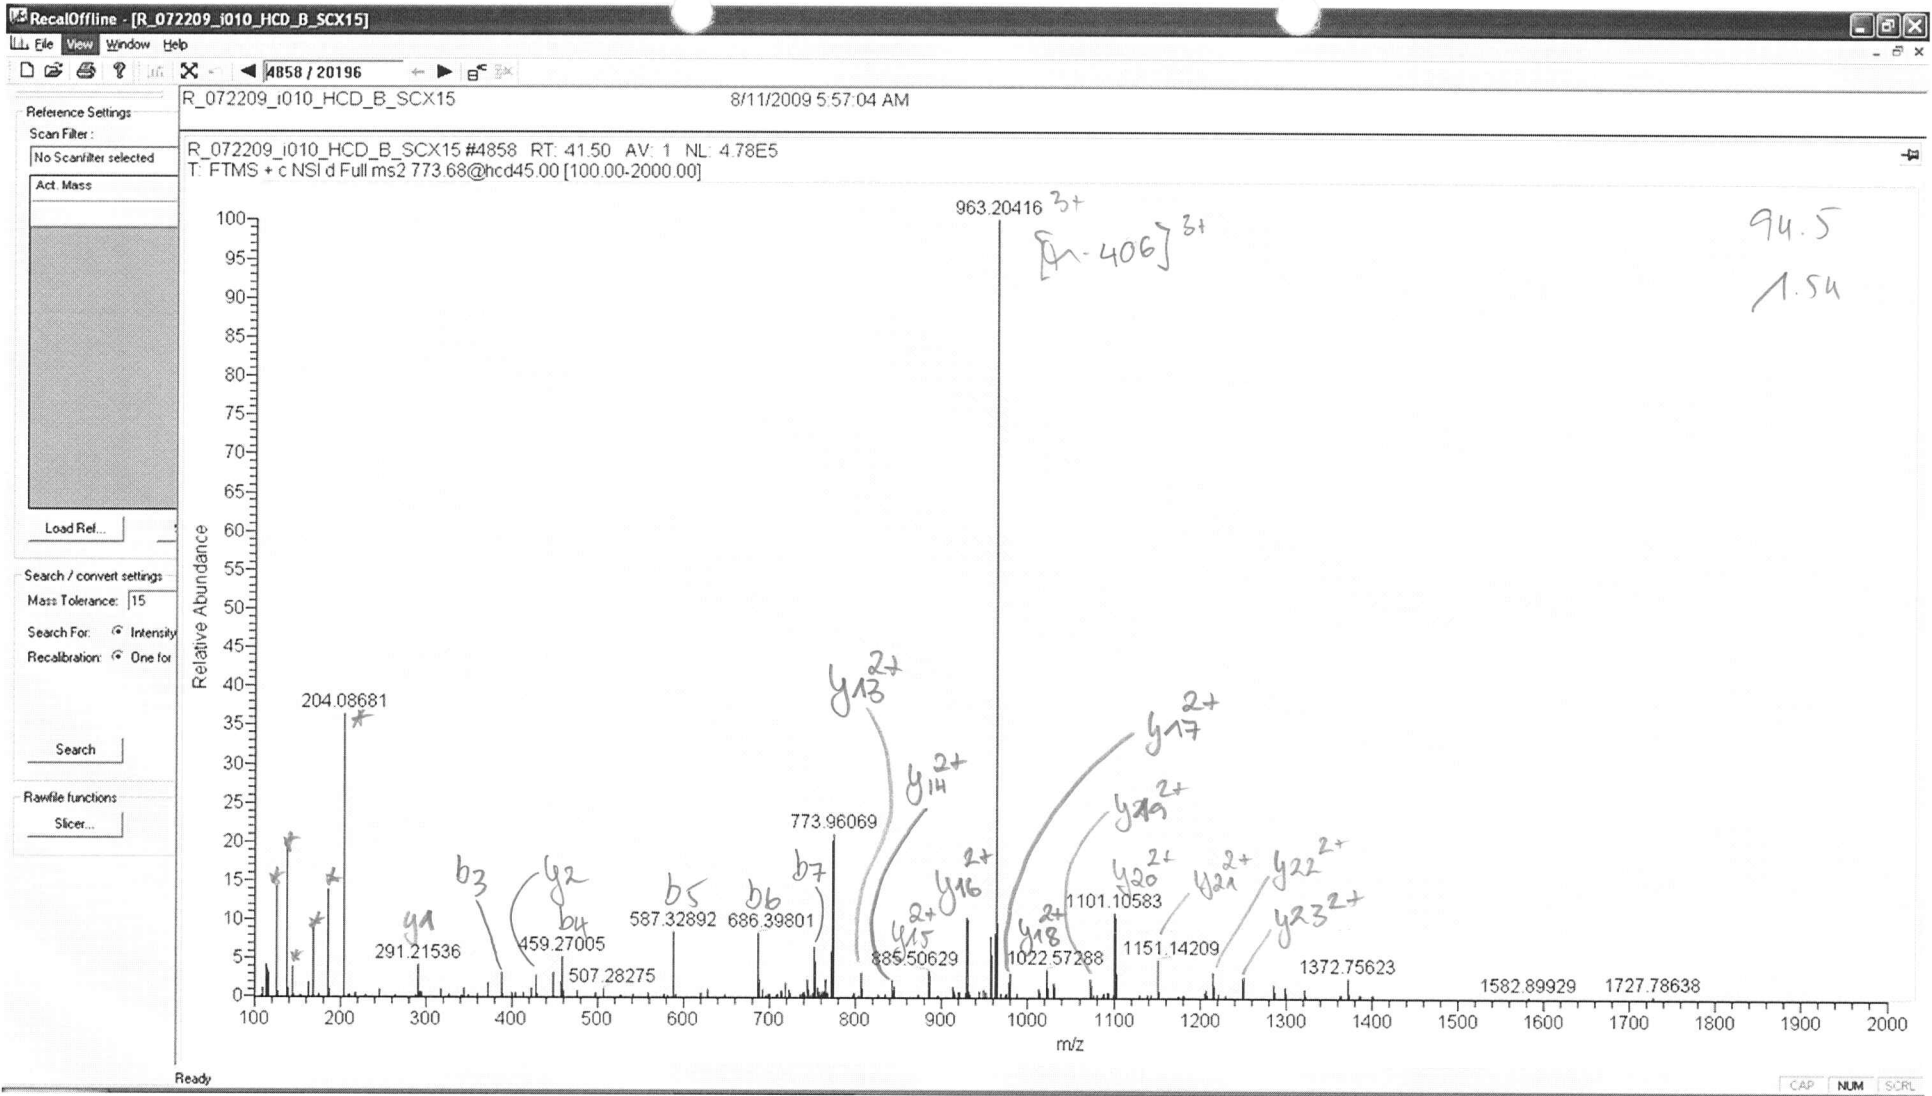

TAAQVGTSVSSATNTStRPIItVHK

no site evidence

N-term., K26 iTRAQ 4plex

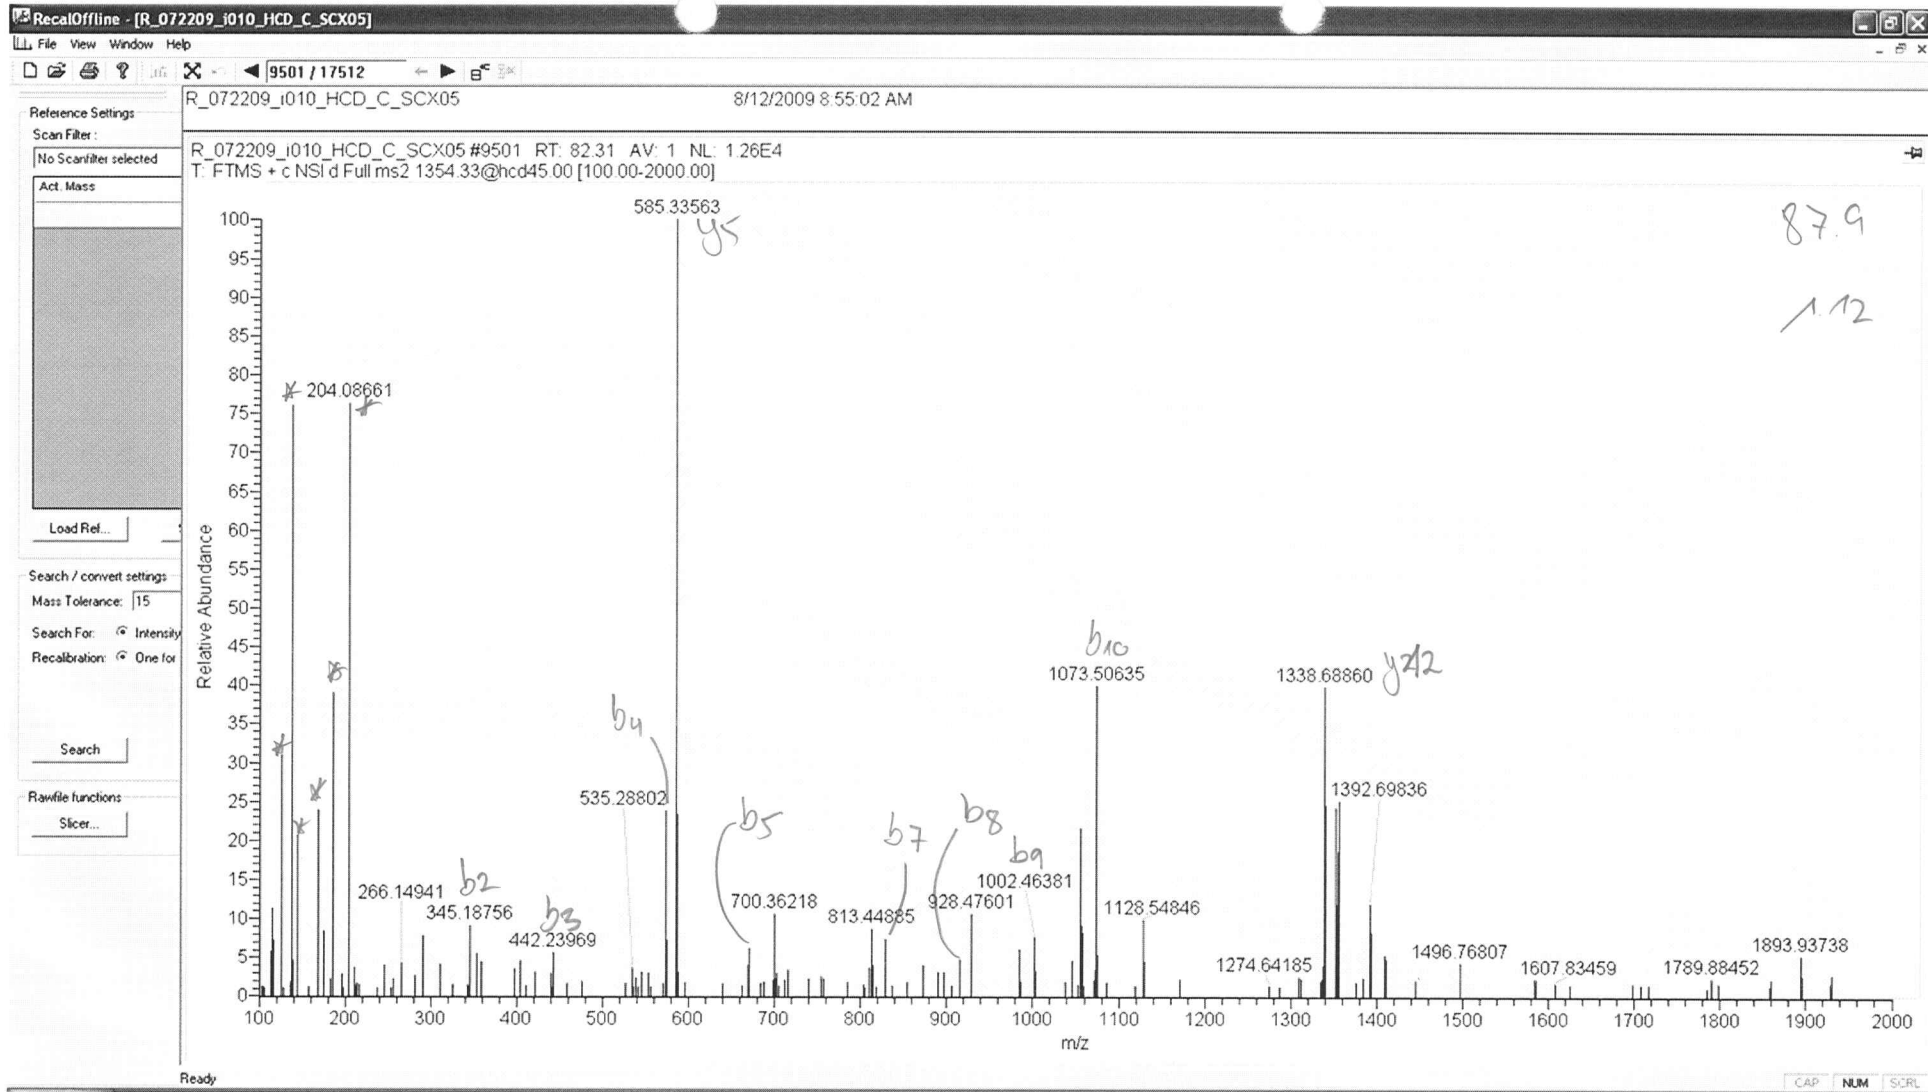

aEPMPSASSAPPASSLYSSPVNSsAPLAEDIDPELAR

b4 b10

No forensic evidence

10-term. iTRAQ4plex

158

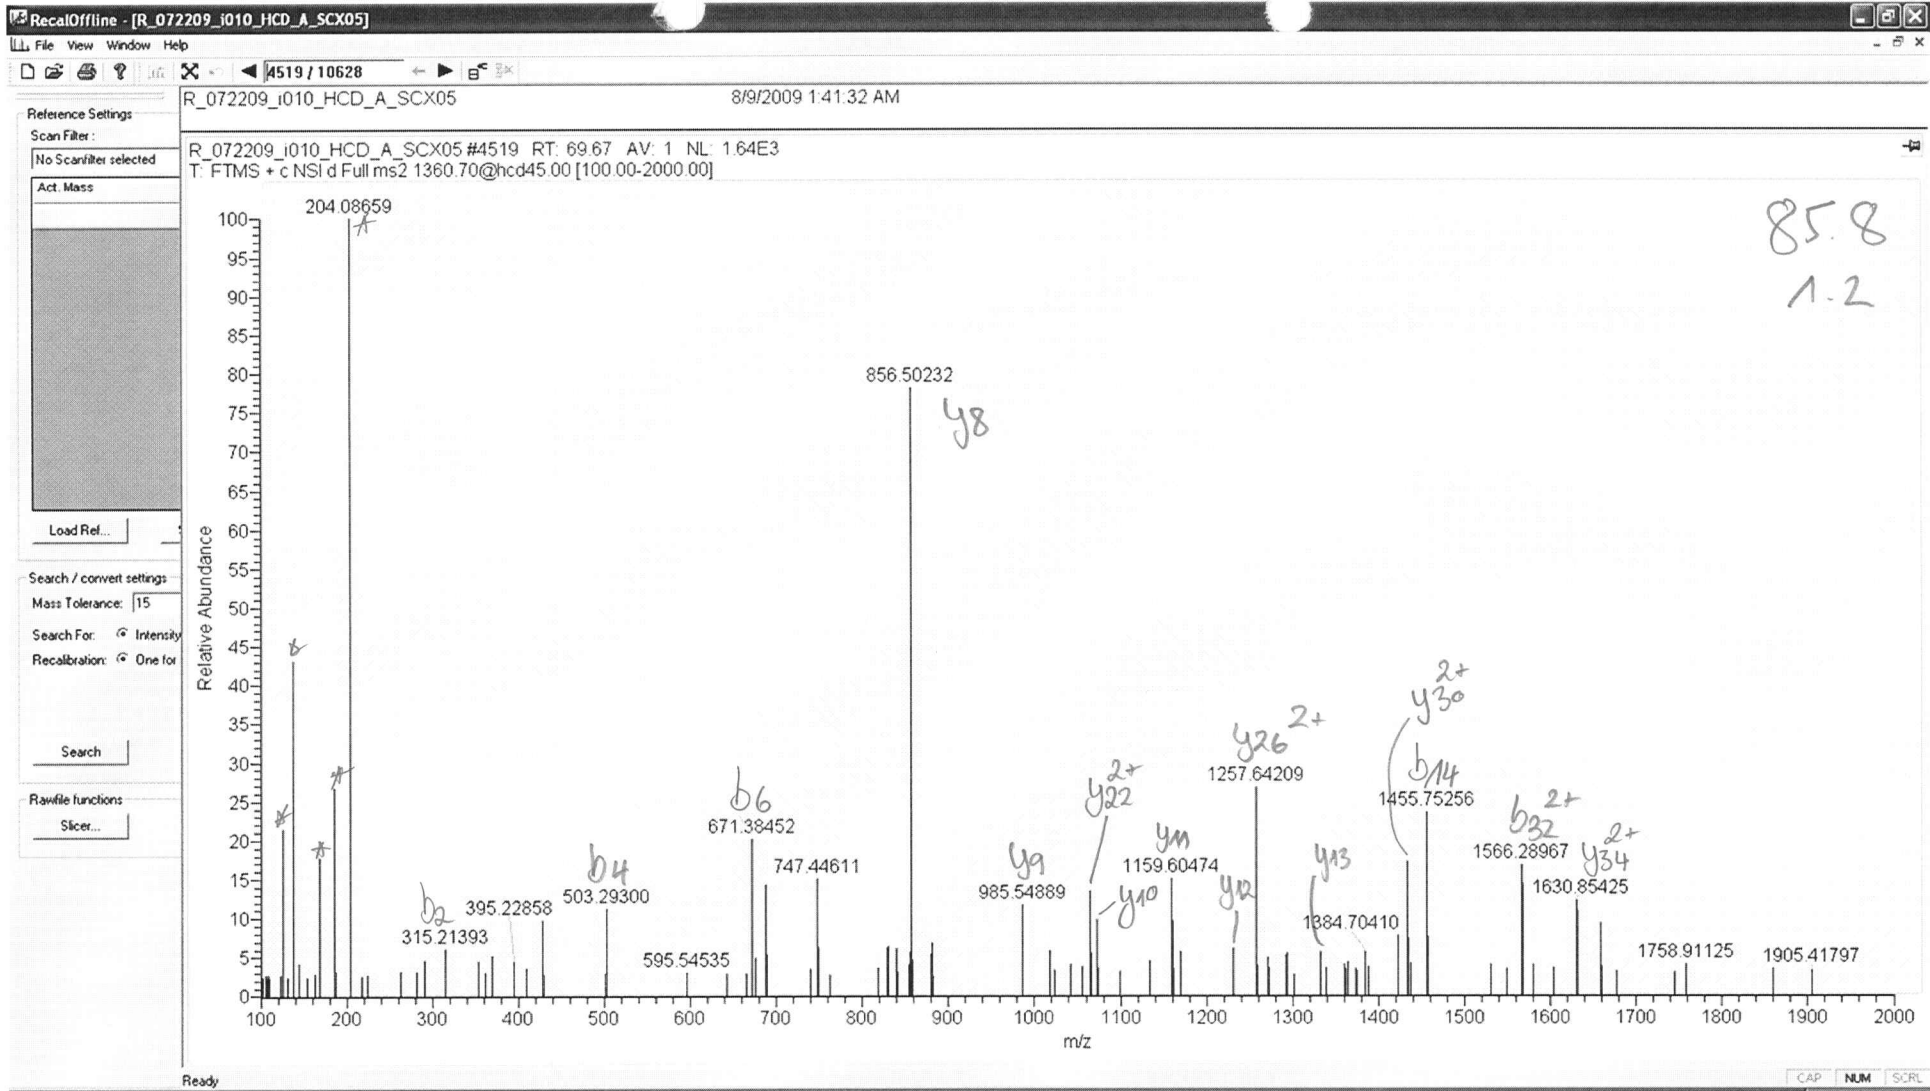

No site evidence

aVSTPAPATTQQSAPASTTAVTSSTTTTVAQAPTPVPALAPTSTPASITPASATASsEPAPAsAAk

b4 b6

b32

y26

y8

N-term., K66 : iTRAQ 4plex

159



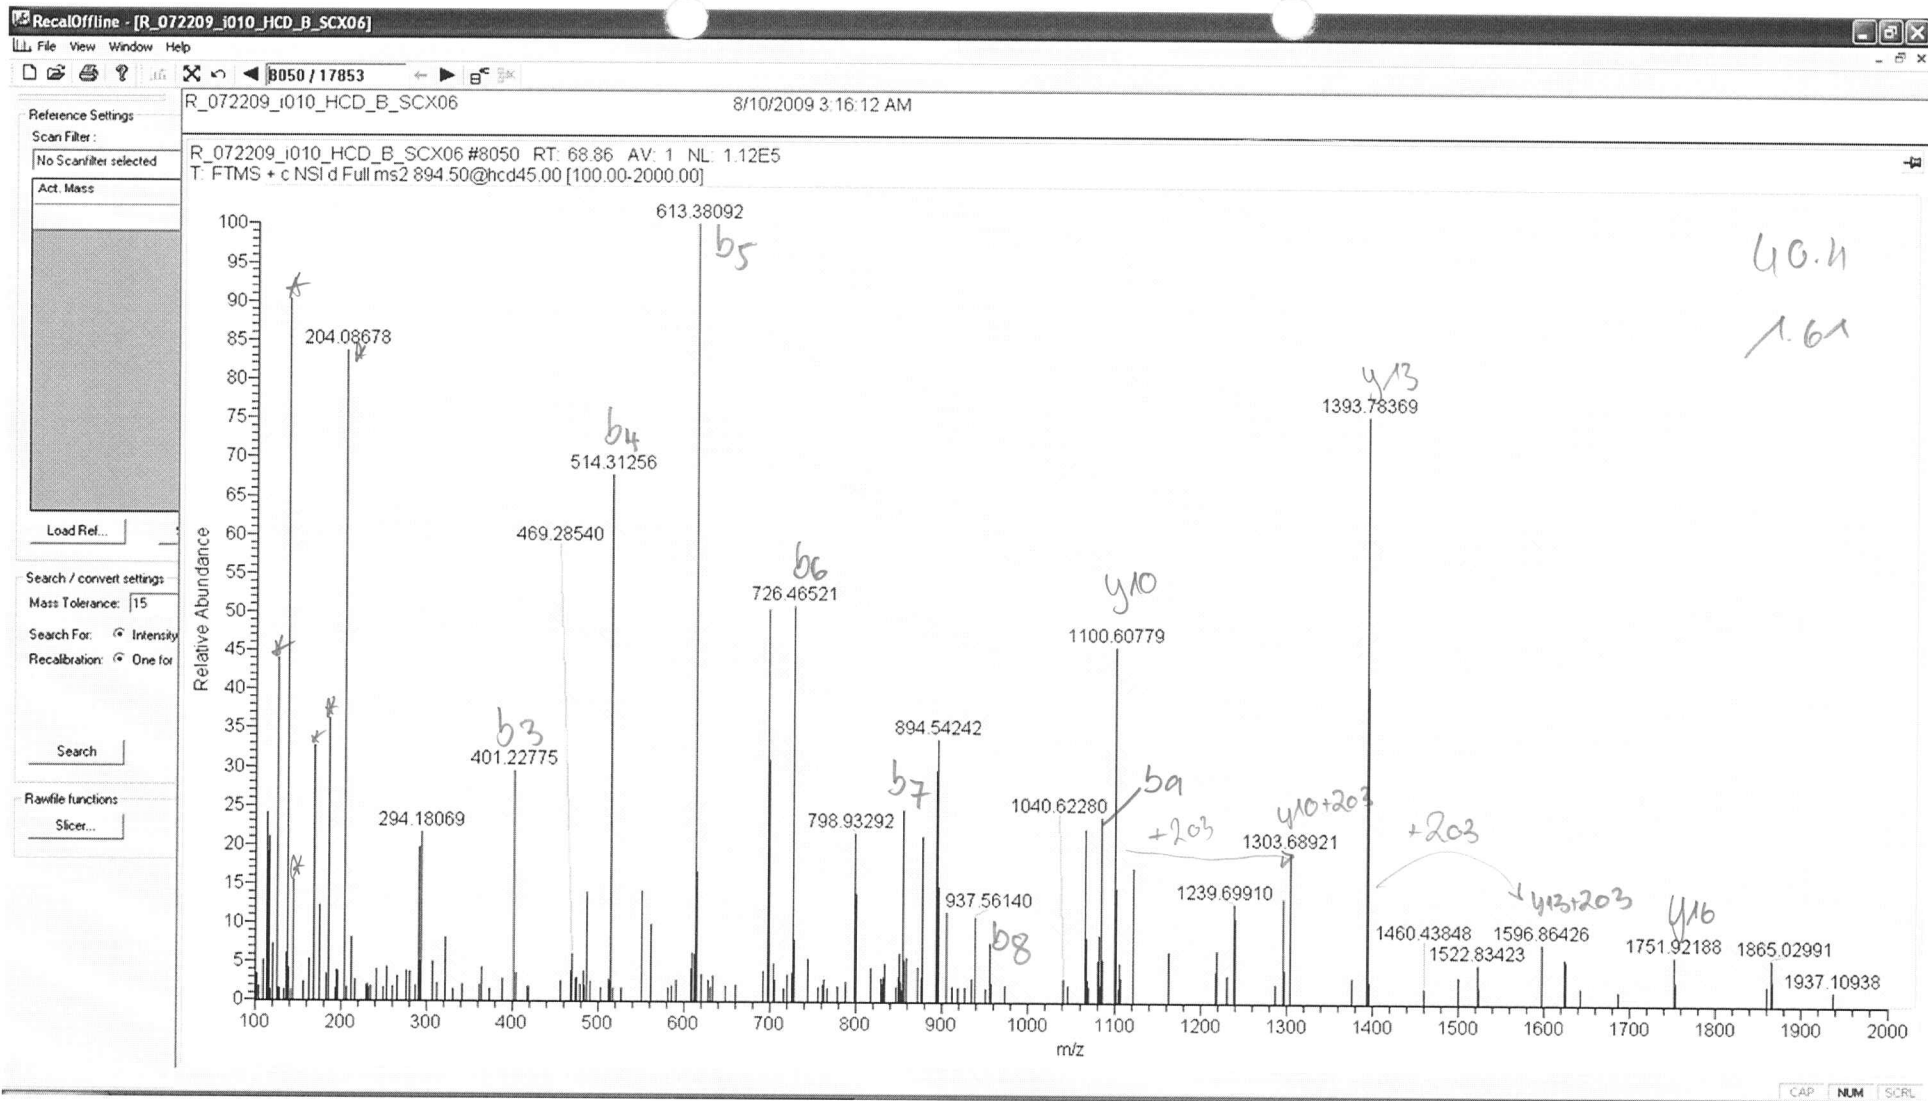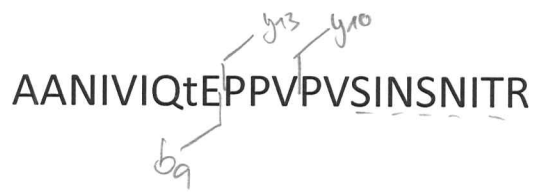

S15, N17, S18, N19 or T21  
N-term. iTRAQ4plex

Reference Settings

Scan Filter:

No Scanfilter selected

Act. Mass

R\_072209\_i010\_HCD\_B\_SCX09 #4990 RT: 47.36 AV: 1 NL: 1.22E4  
T: FTMS + c NSI d Full ms2 1258.67@hcd45.00 [100.00-2000.00]

Load Ref...

Search / convert settings

Mass Tolerance: 15

Search For: Intensity

Recalibration: One for

Search

Rawfile functions

Slcer...

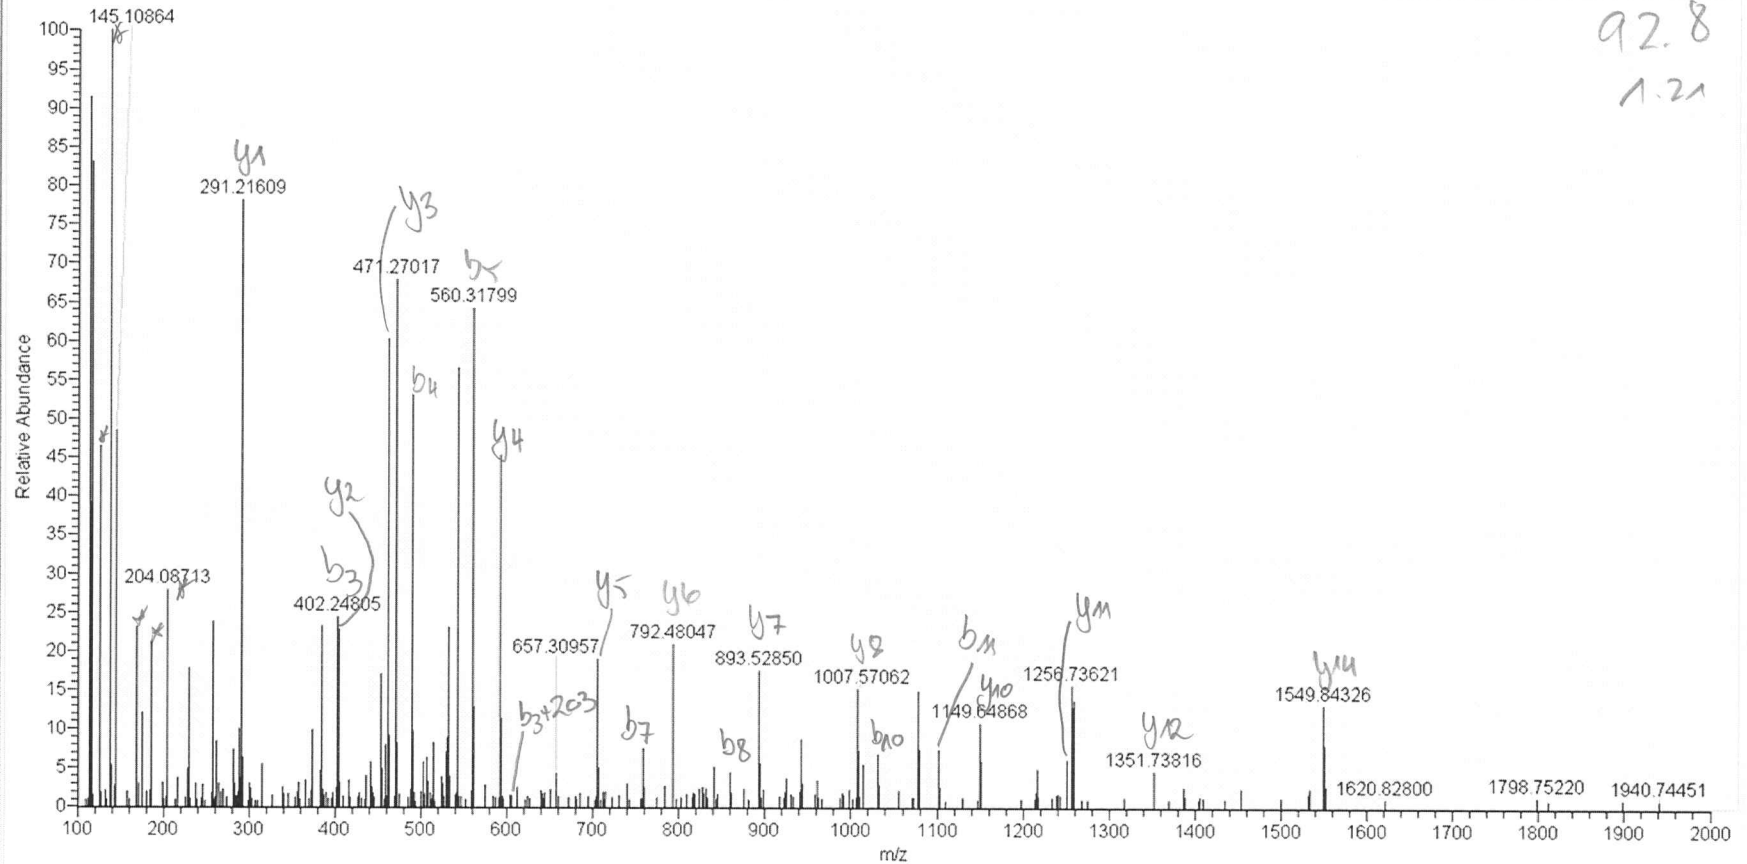

92.8  
1.21

IGSSAPTTTAANTsLMGIk

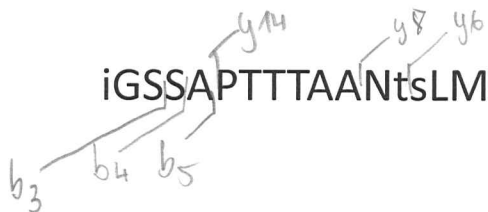

S3; 2nd site: unknown  
N-term., K19; TRAQ 4plex  
161

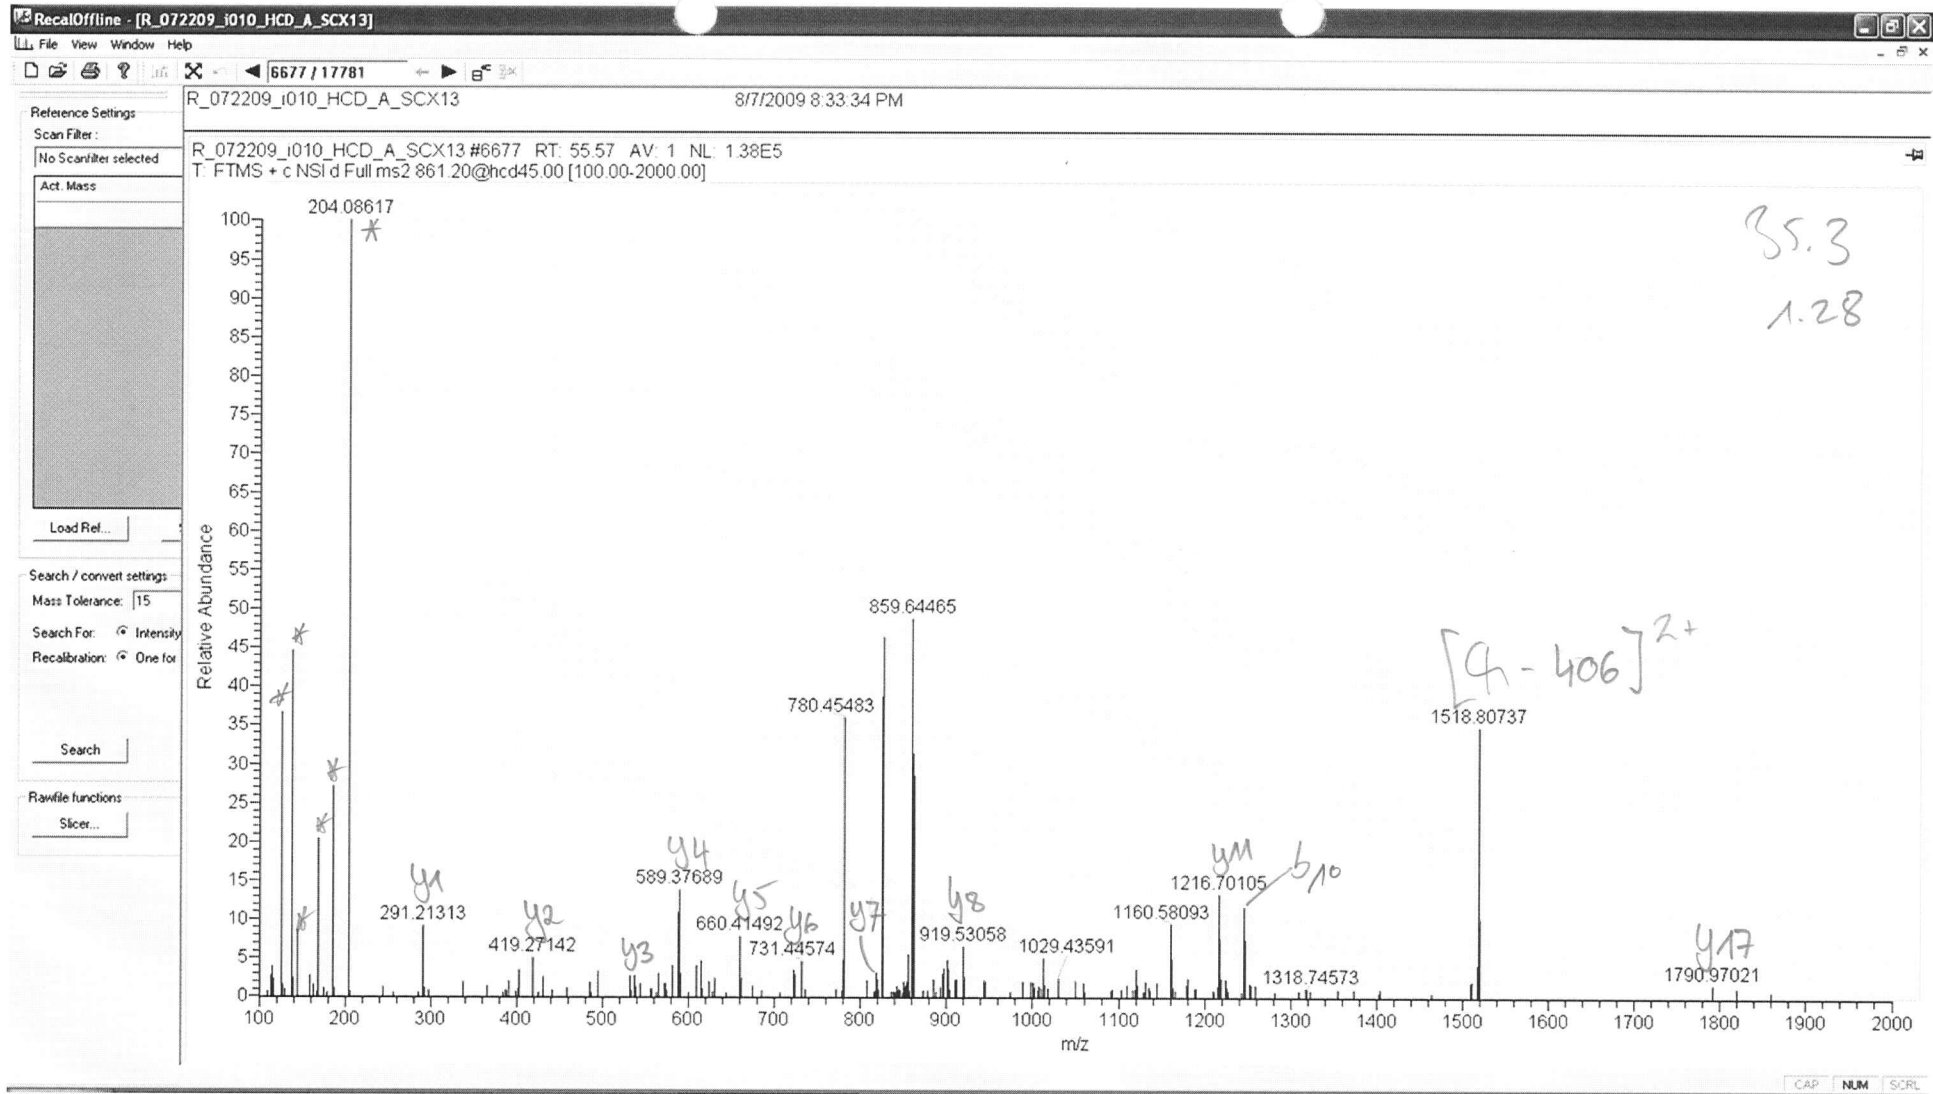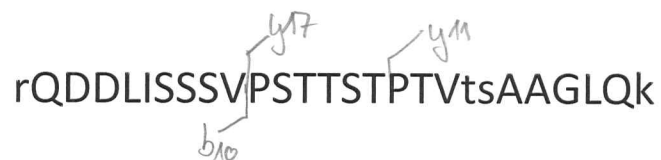

no site evidence  
 bottom, K27 iTRAQ 4plex

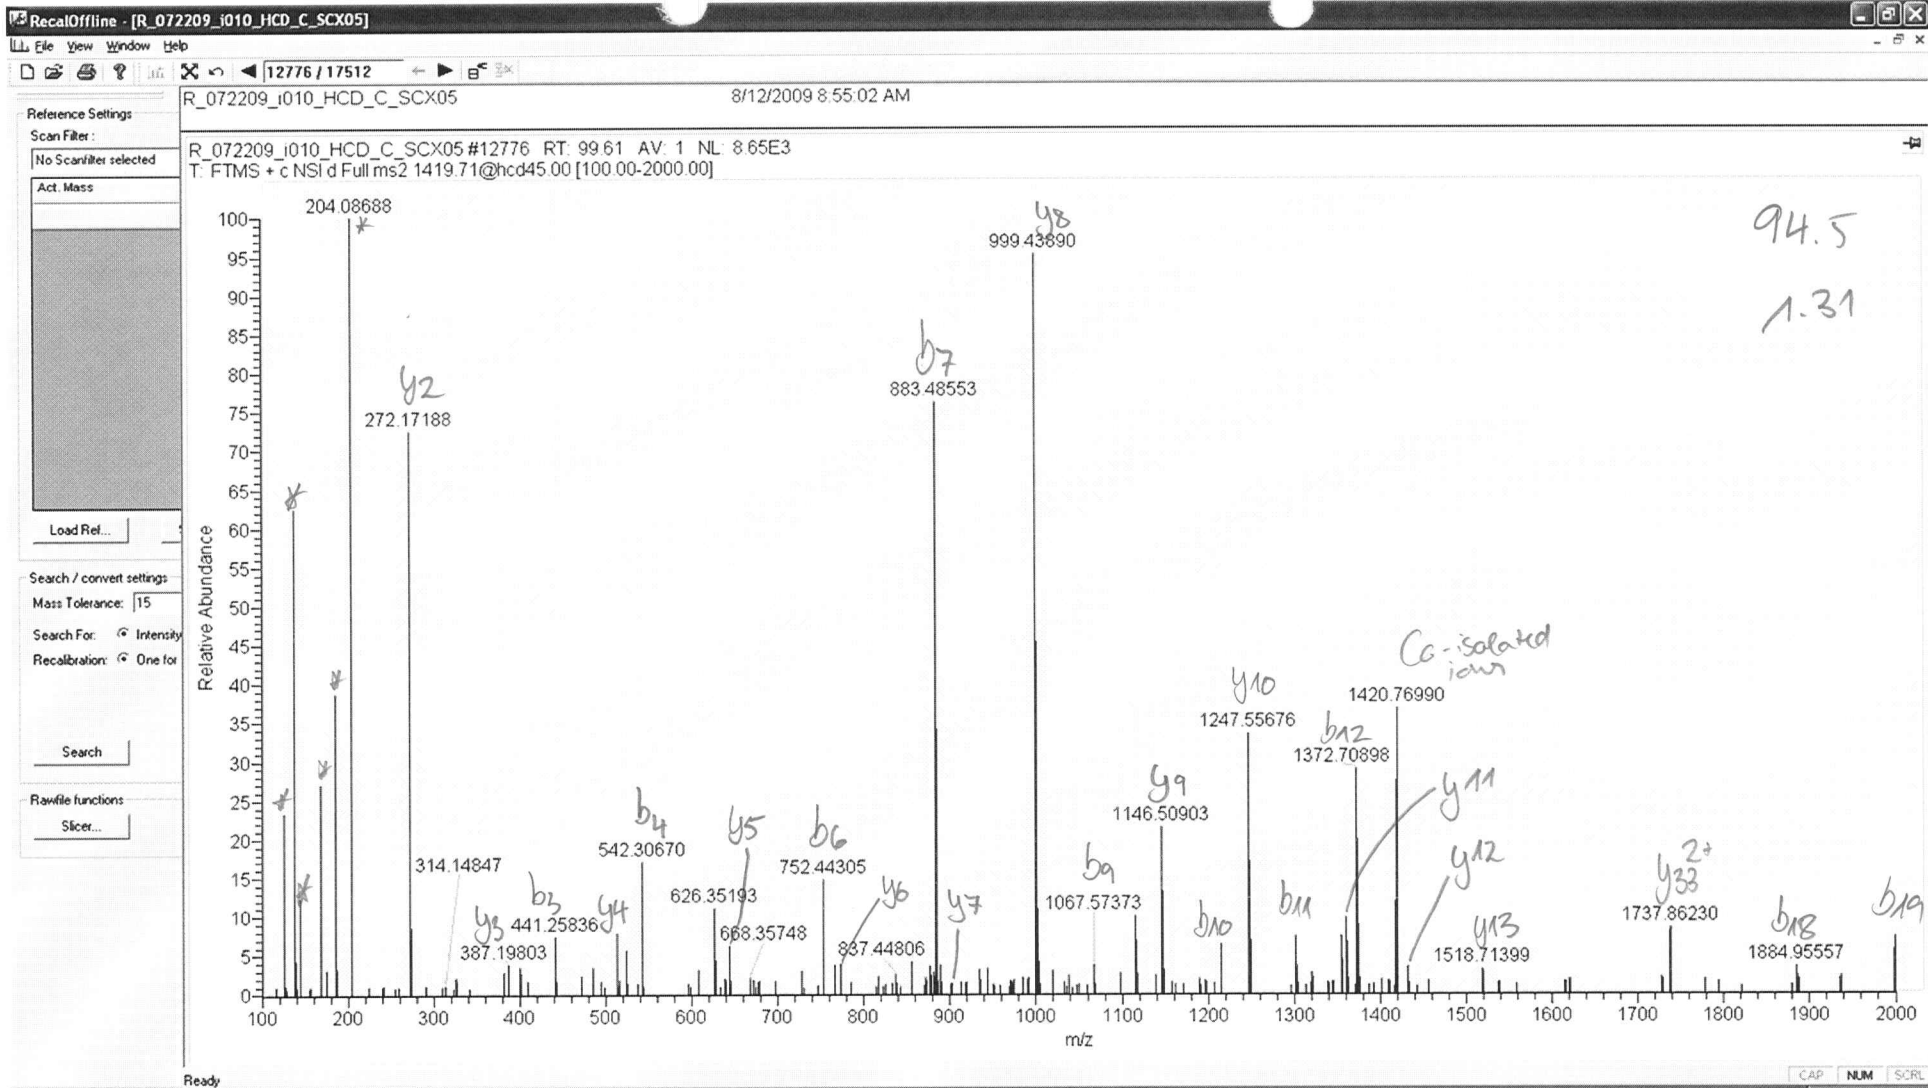

aPQTPLMPSFSAPSGTGLLPTITQQASLTSLAQGTGTTSAITFP EEQEDPR

X-tom. iTRAQ 4plex

163

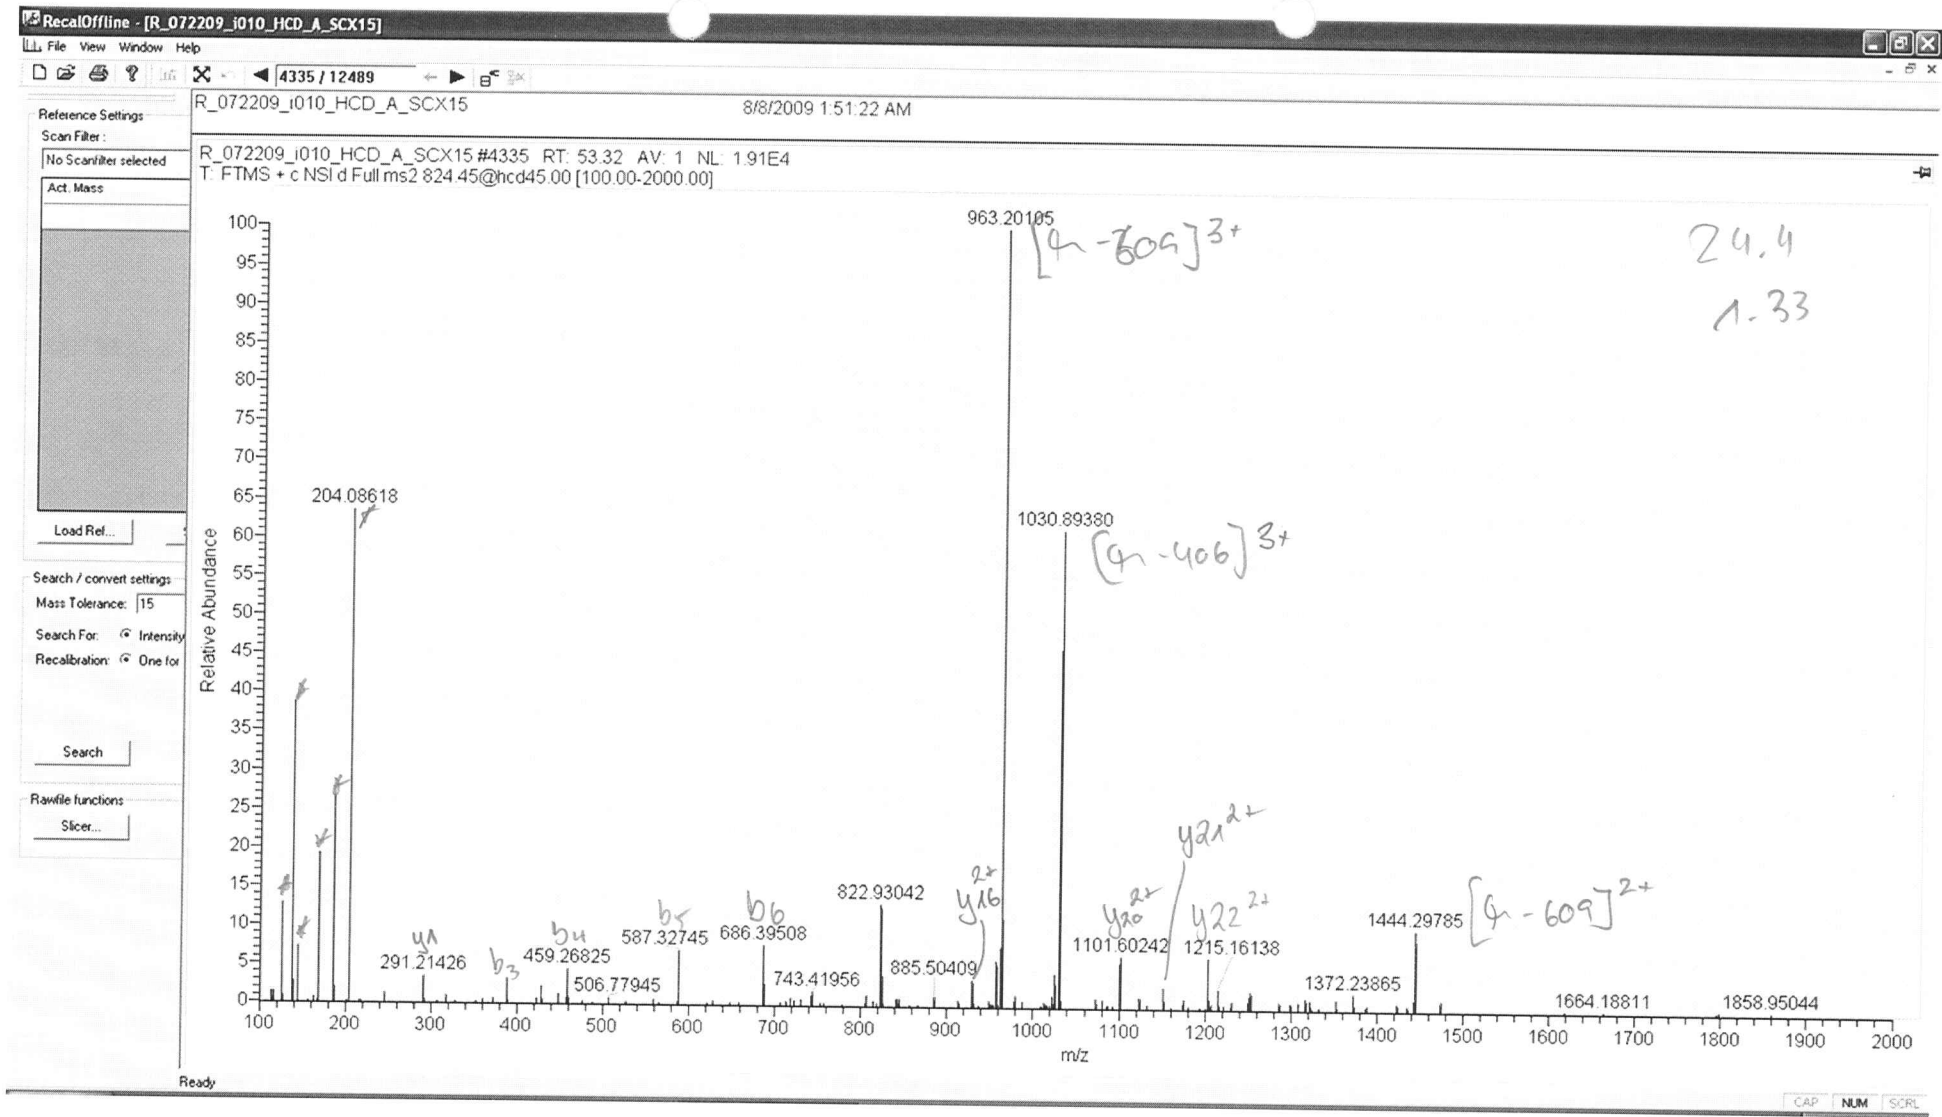

tAAAQVGTSVSSATNTStRPIItVHk

no site evidence  
N-term., K26: ;TRAQ 4plex

165

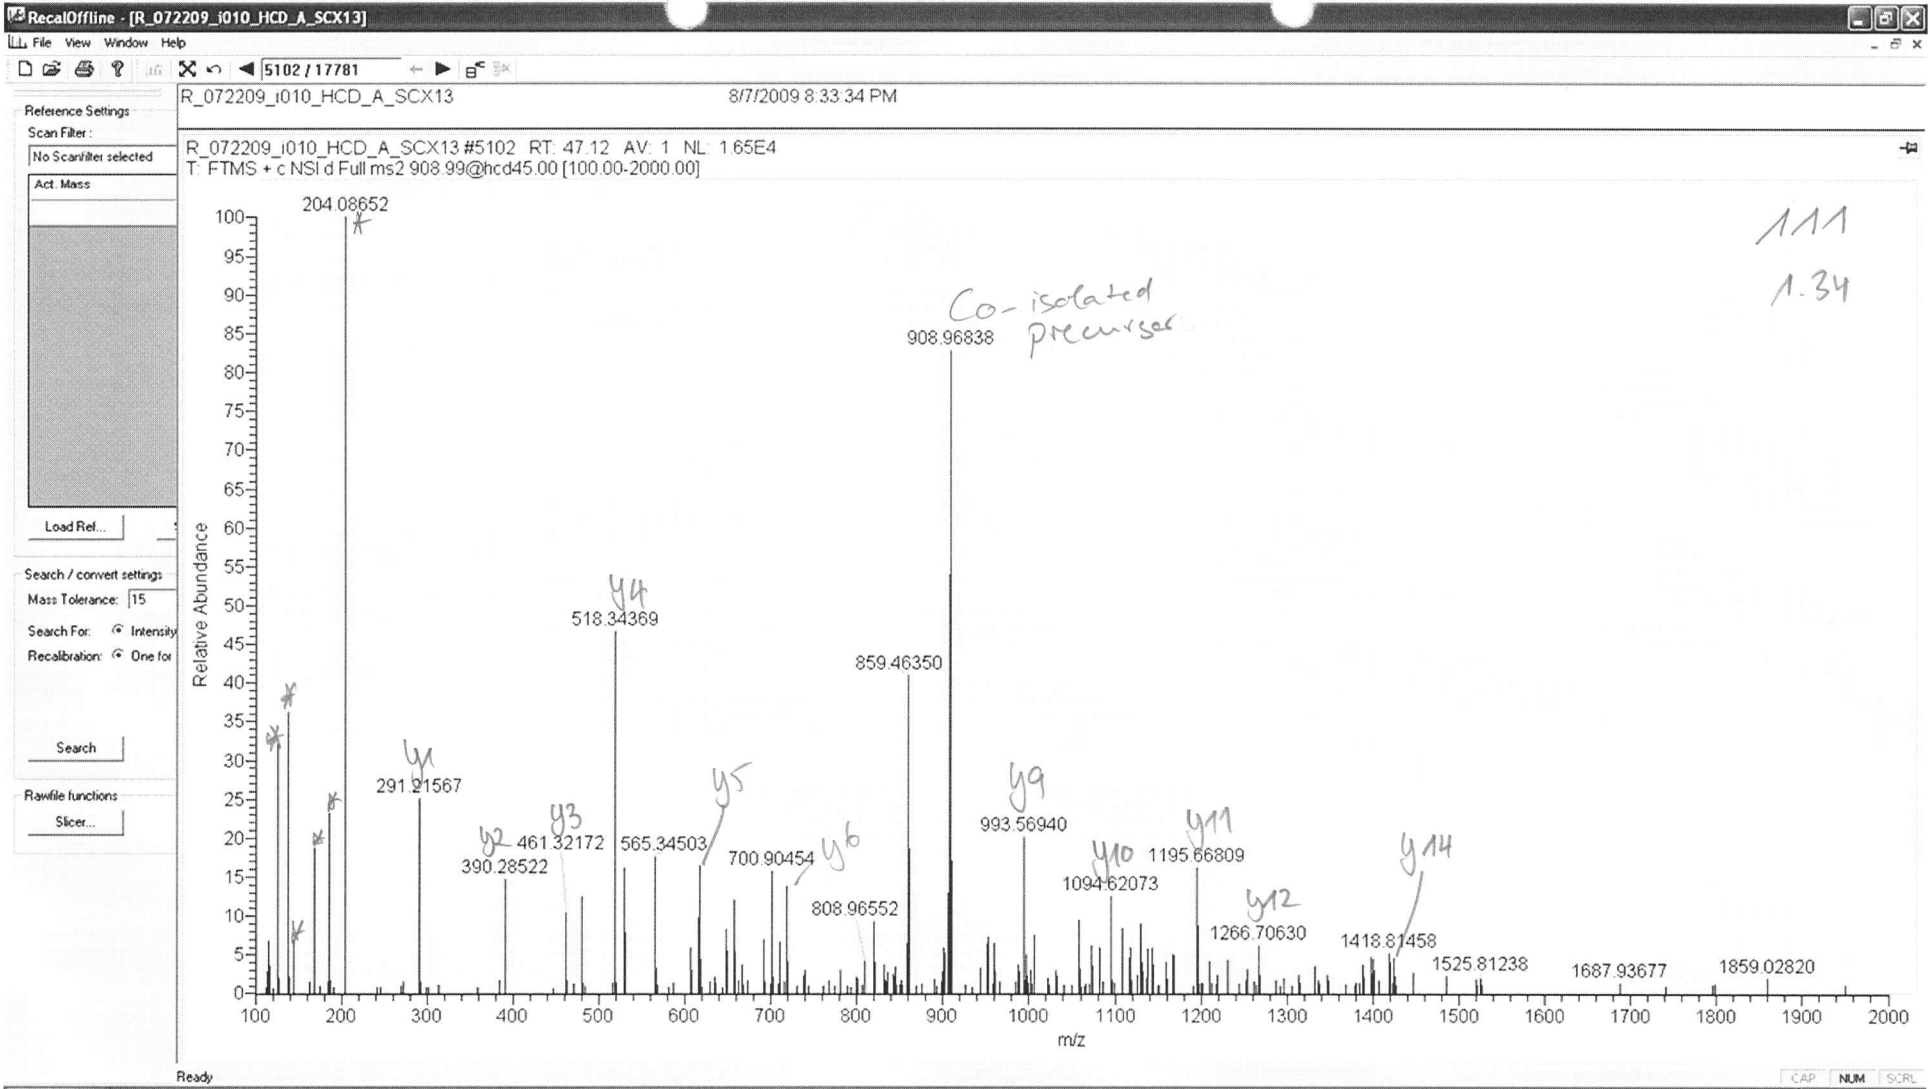

no finite evidence  
b- form, U1, U31: iTRAG4plex

KTEALQVATTSPANTTGTATTSSSTtVGAVk

166

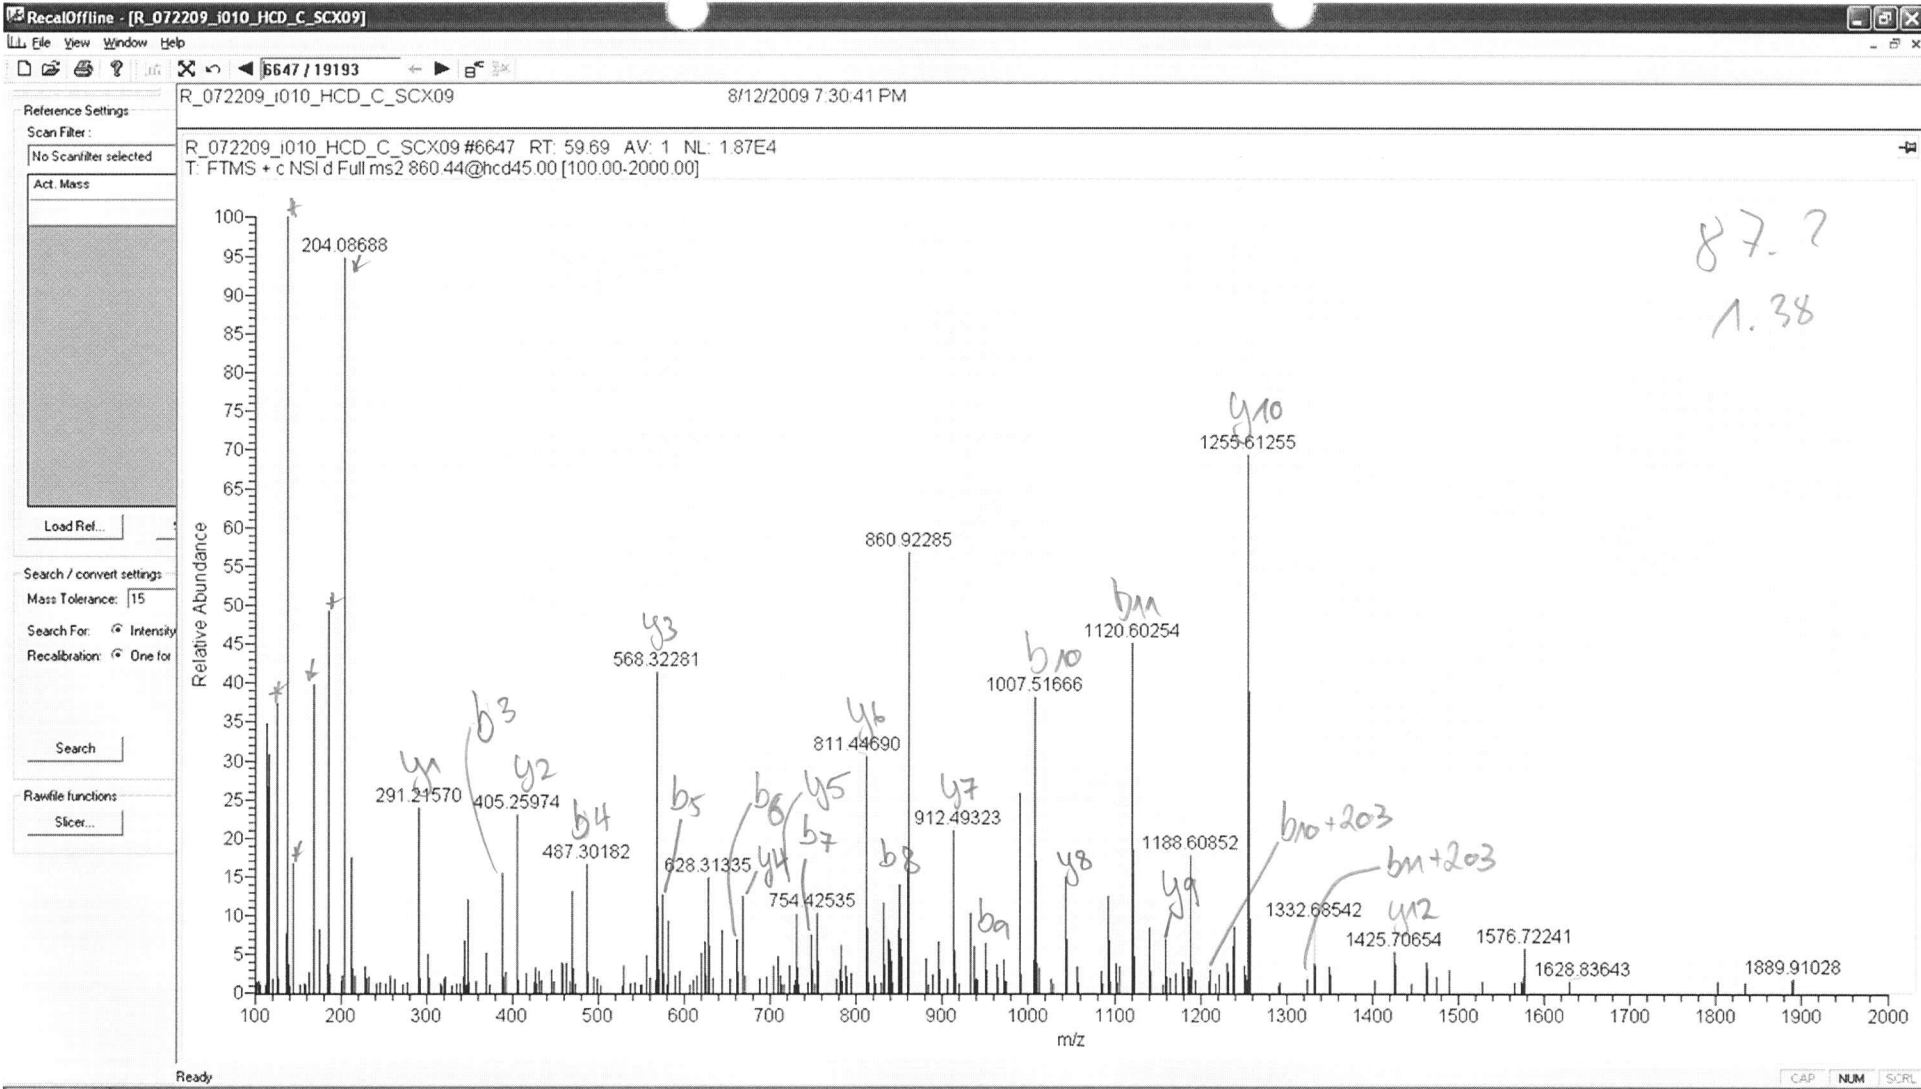

S3, S5, S6, S7, T8 or T9

N-term, K21: iTRAQ 4plex

167

gVSVSSSTTGLPDMTGSVYnk

b10  
b11

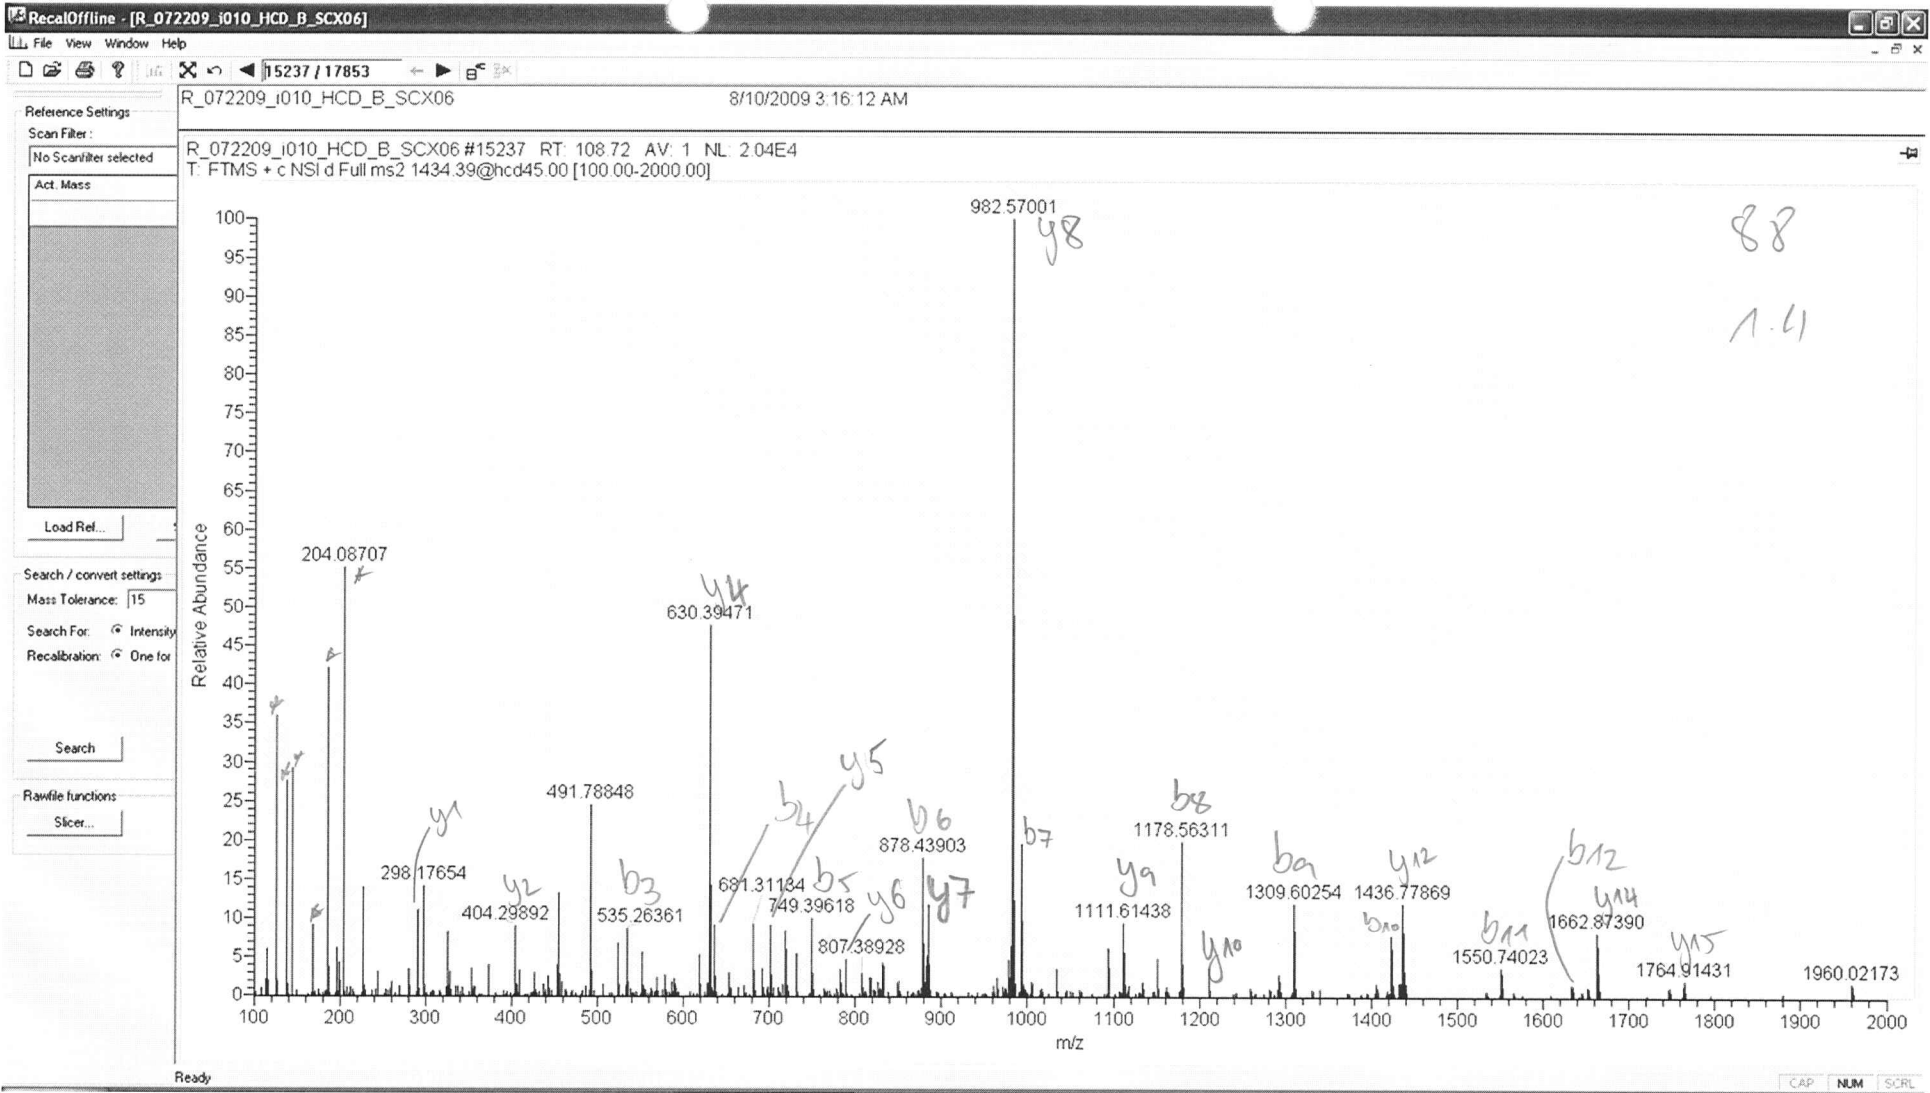

No site evidence  
N-term, K33: iTRAQ 4plex

dFQTLNWMLQTLNEEPVTPEPEVEPPsAPELK

168



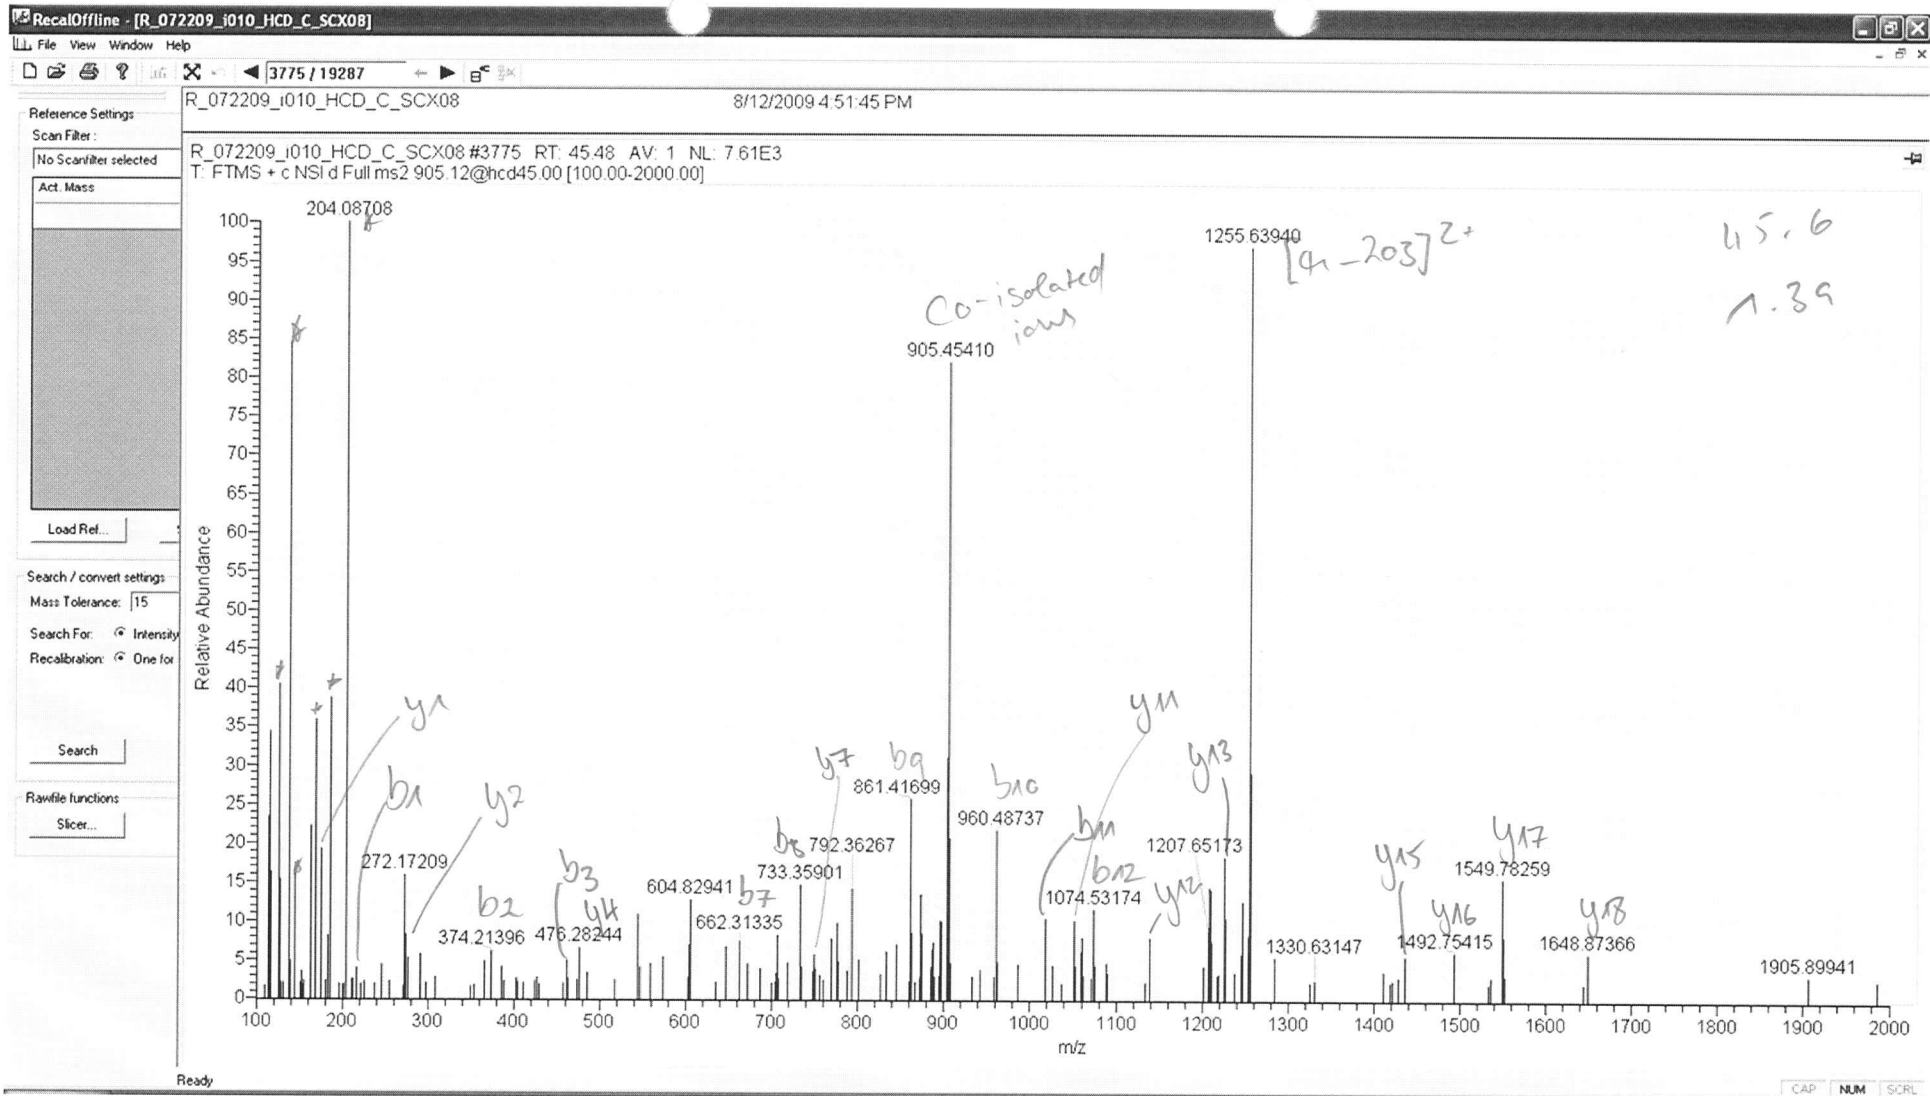

no 27k evidence  
 N-term. iTRAQplex

aSASGSGAQVGGPISSGSSASSVTVtR

Reference Settings

Scan Filter:

No Scanfilter selected

Act. Mass

R\_072209\_i010\_HCD\_C\_SCX09 #1407 RT: 26.80 AV: 1 NL: 2.29E3  
T: FTMS + c NSI d Full ms2 958.48@hcd45.00 [100.00-1930.00]

Load Ref...

Search / convert settings

Mass Tolerance: 15

Search For: Intensity

Recalibration: One for

Search

Rawfile functions

Slicer...

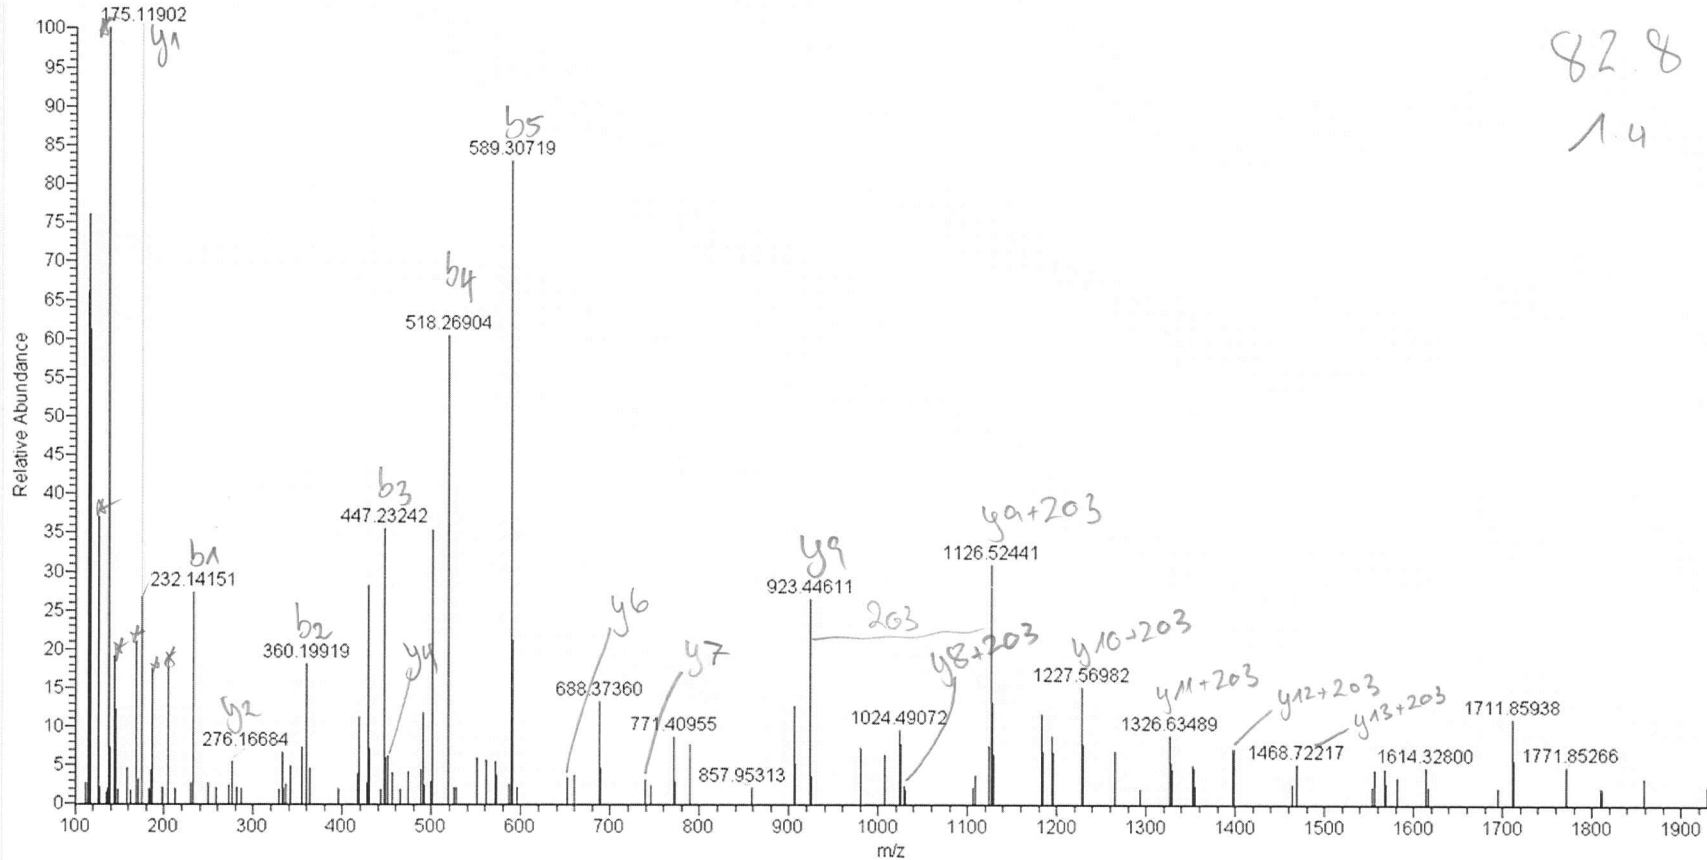

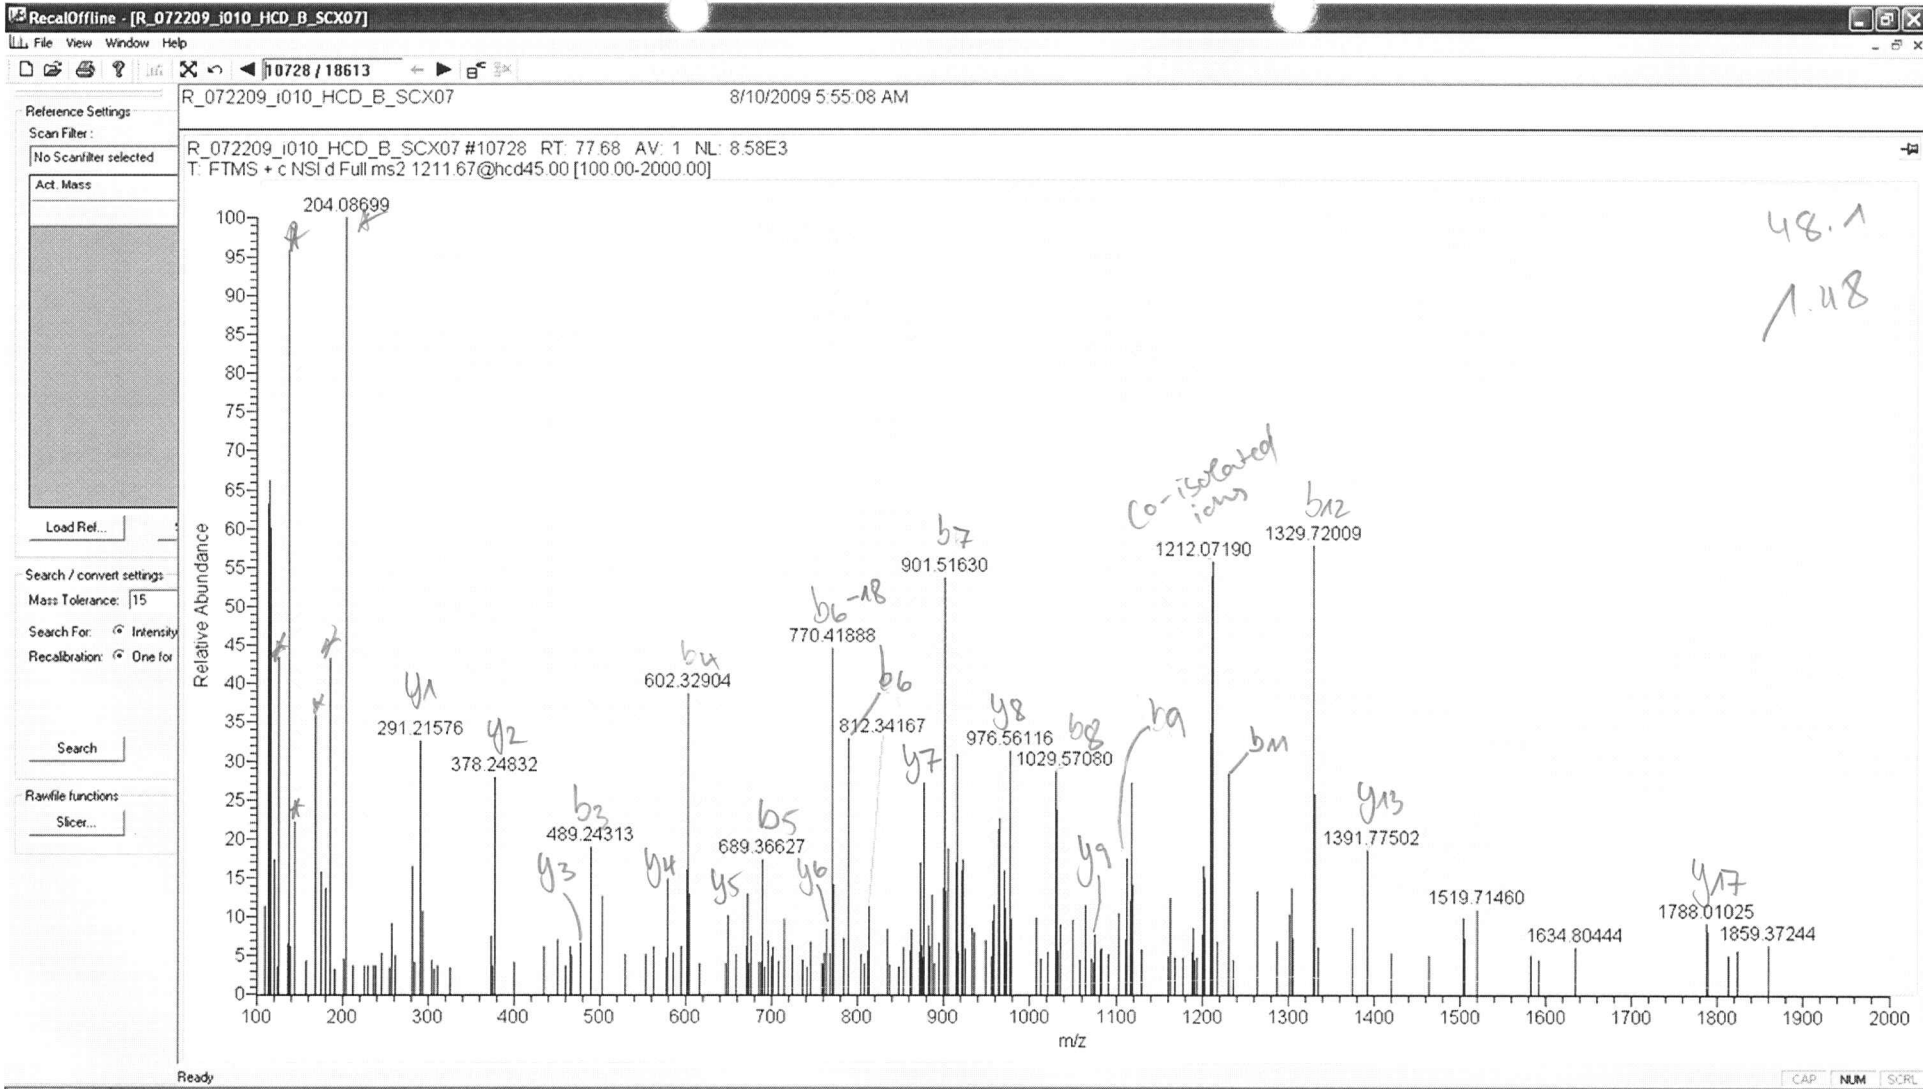

no site evidence

no term, 432: iTRAQ 4plex

tNEISVIQSGGVPTLPVSLGATSVVNNATVsk

171

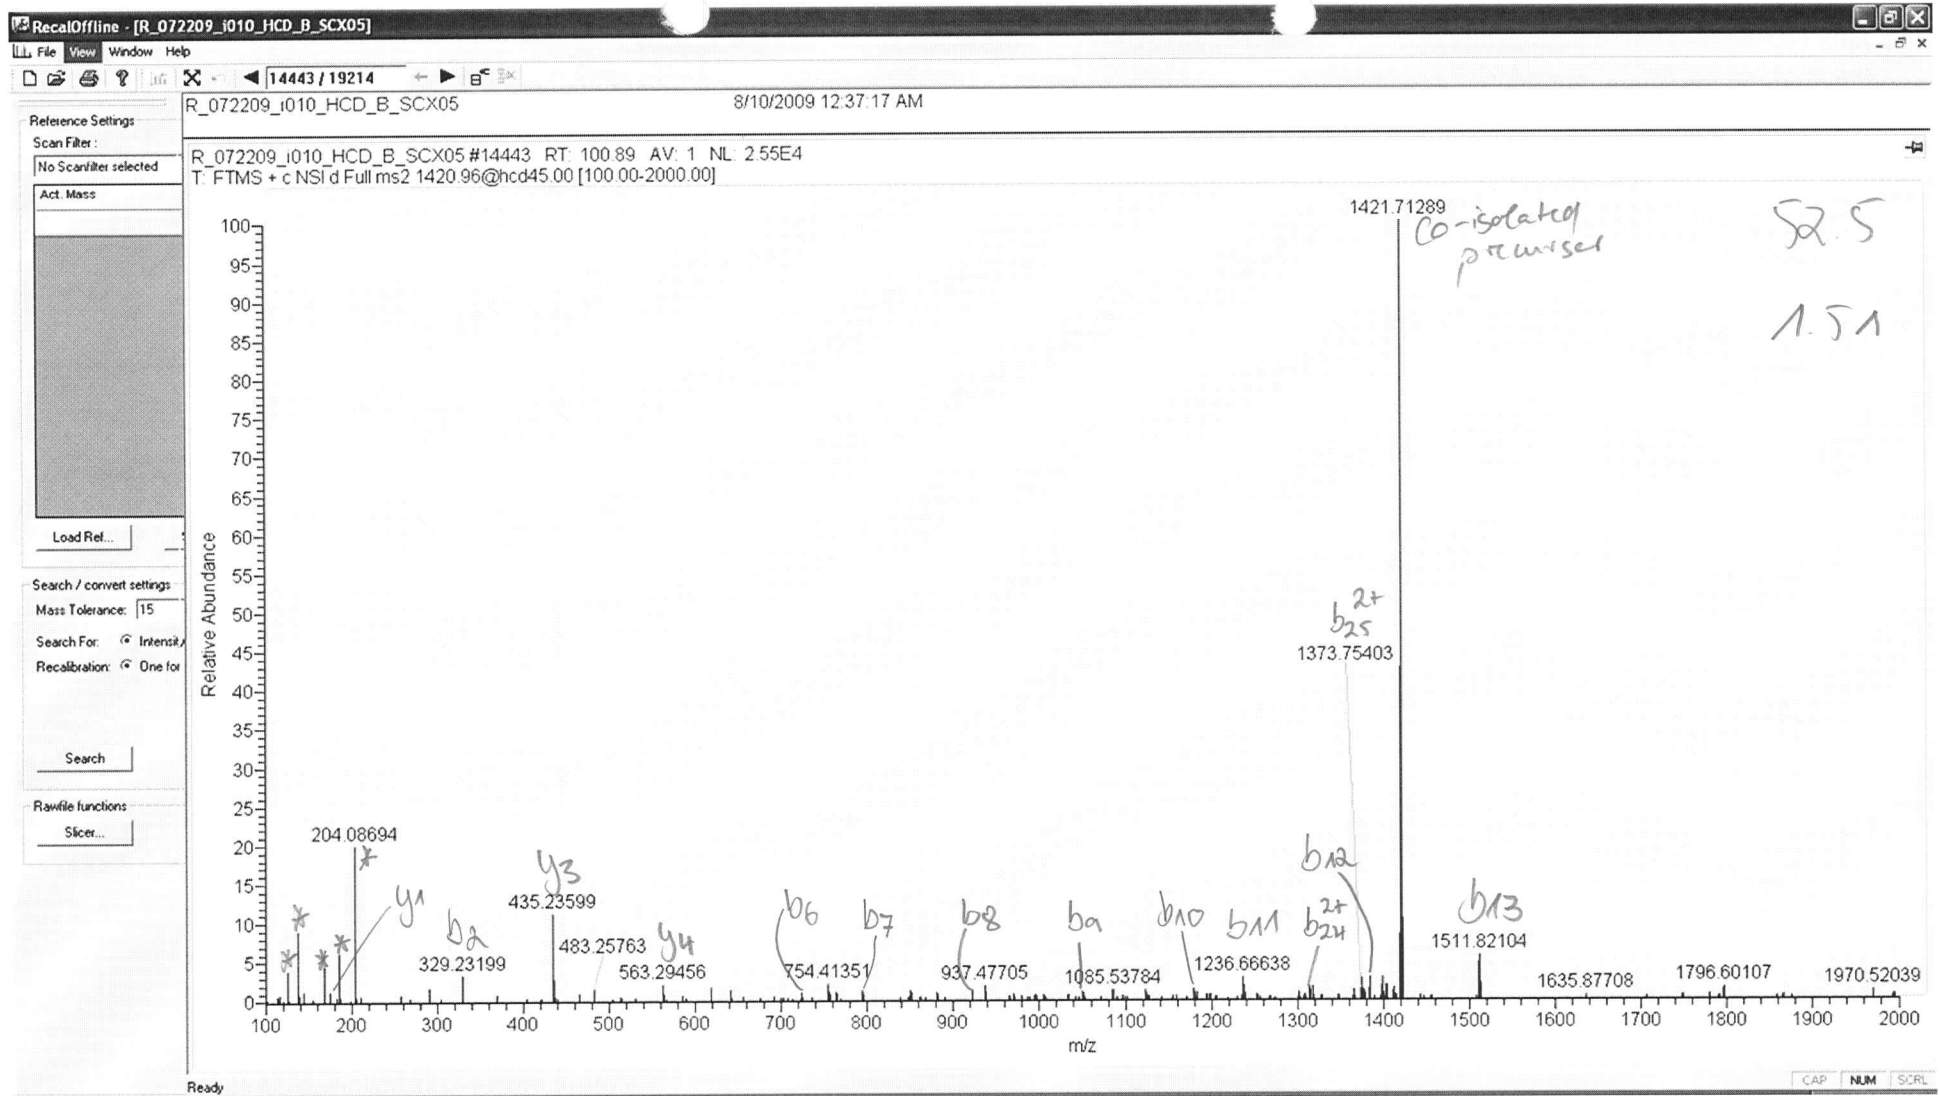

IAPPSLAQQQGFQPGLSQPTSVQQIPIPIYAPLQGQHQAQLSLGAGPAVSQAQELFSSsLQPYR

6-ten: iTRAB4plex

173

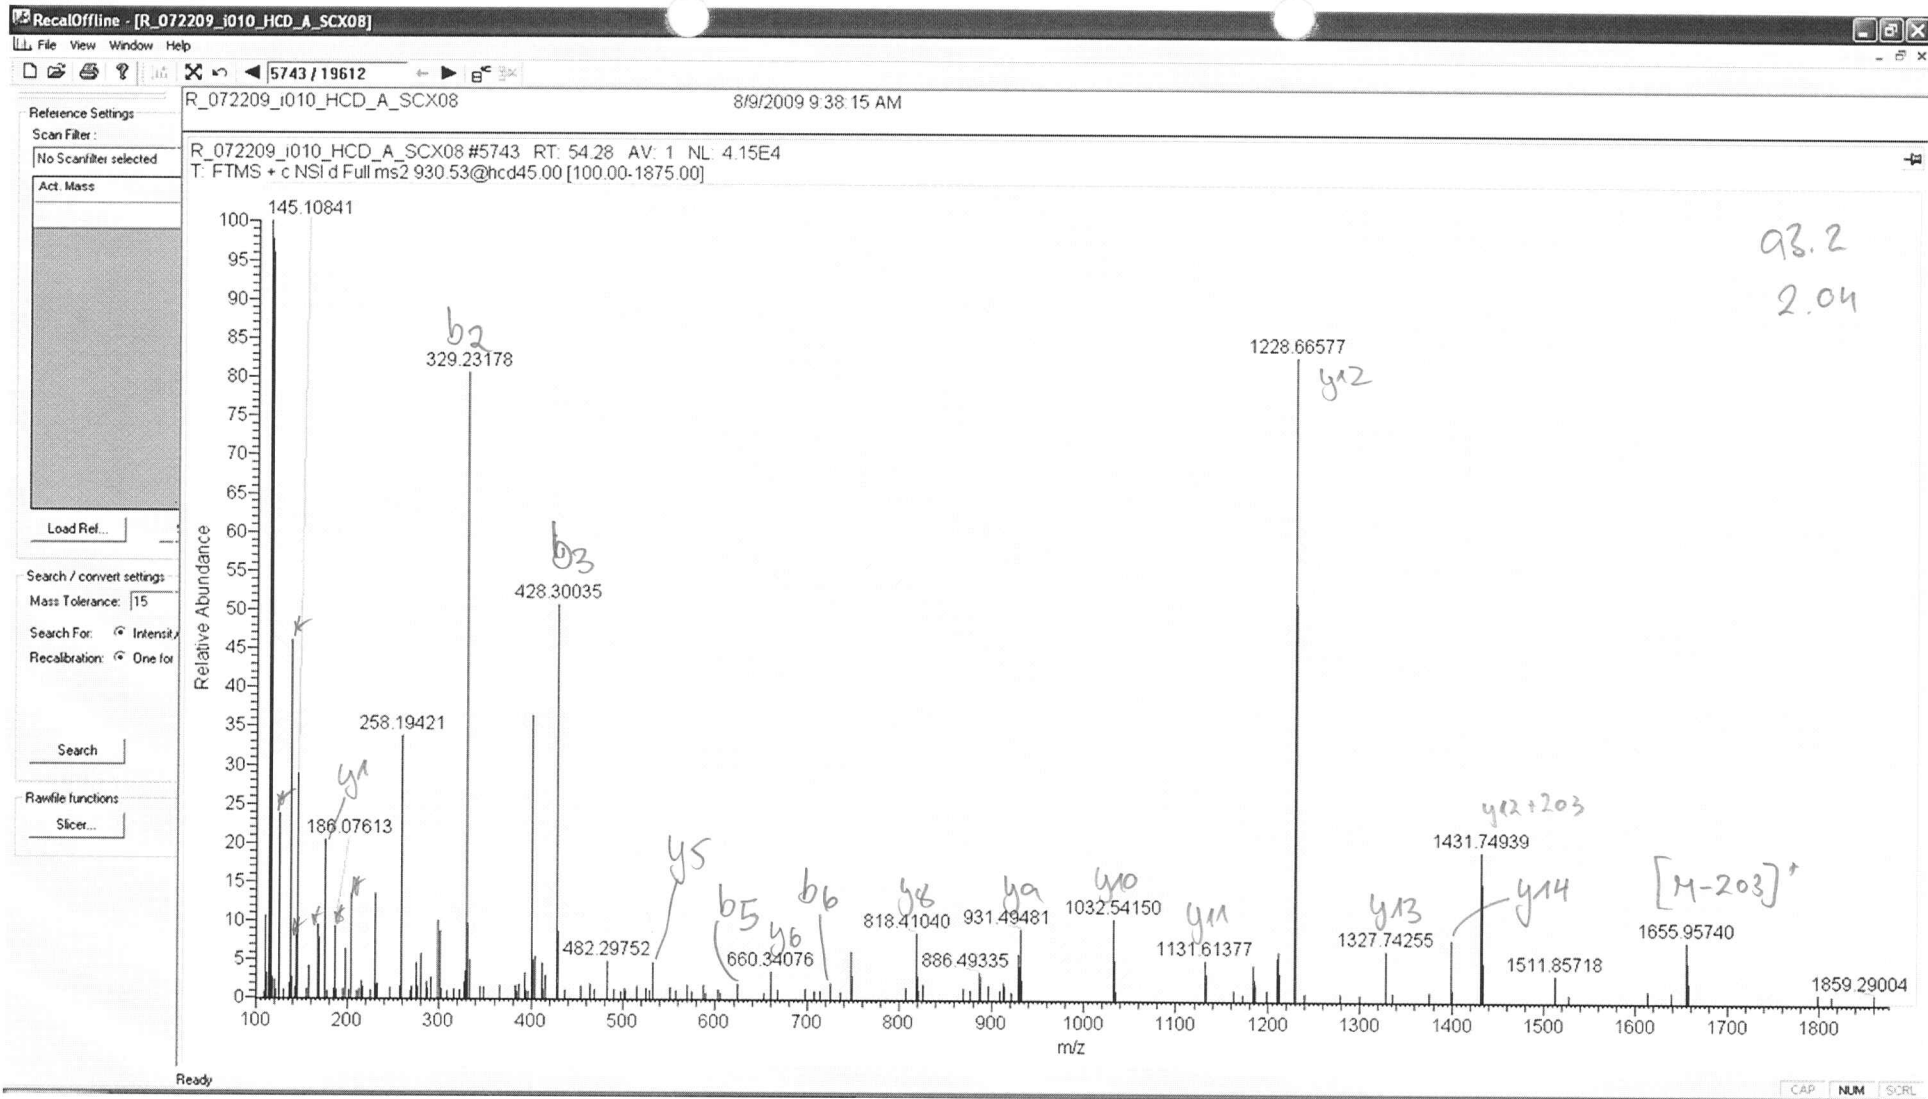

y12  
IAVPVTLASQQAGtR

no  $\delta$  evidence

no term: iTRAQ 4plex

176

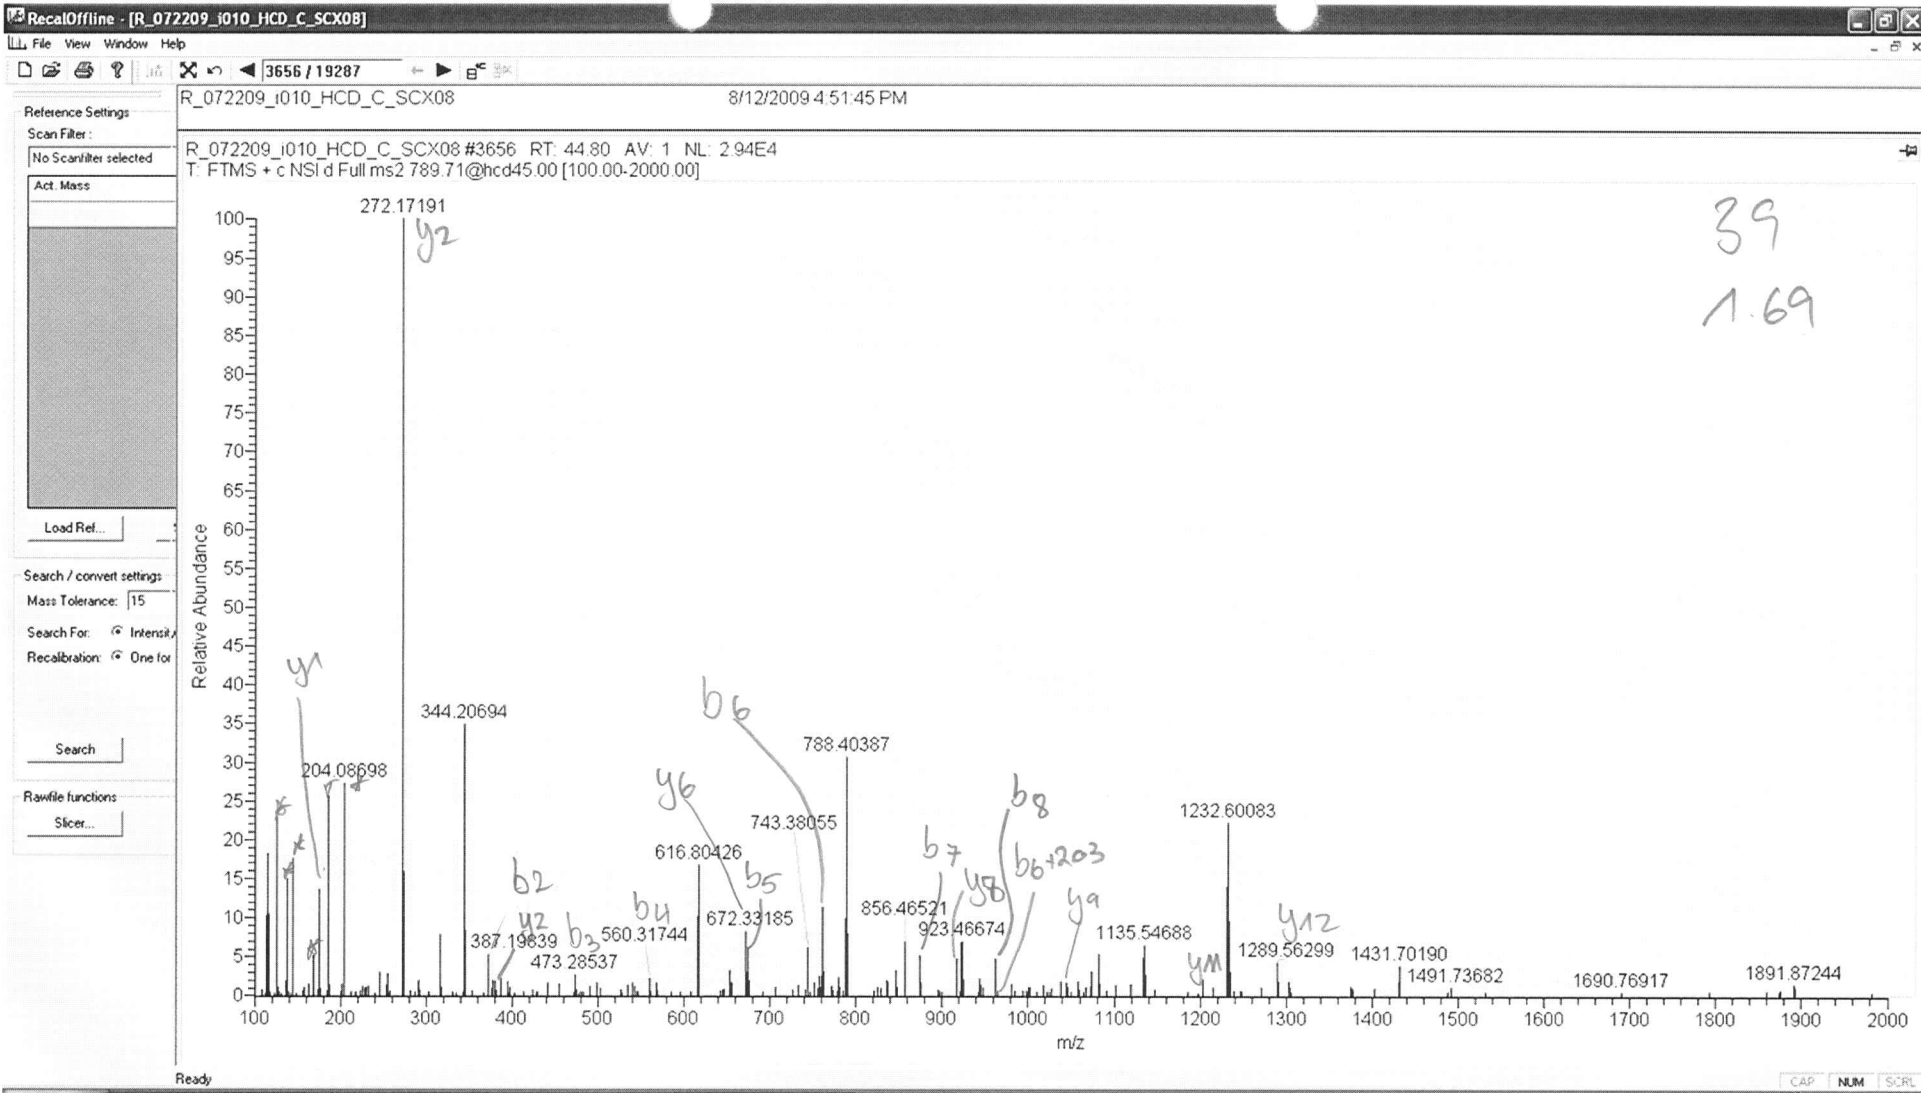

qVTSNSLsGTQEDGLDDPR

b6

T3, S4, N5 or S6

No. term : ; TRAQ 4p ex

177

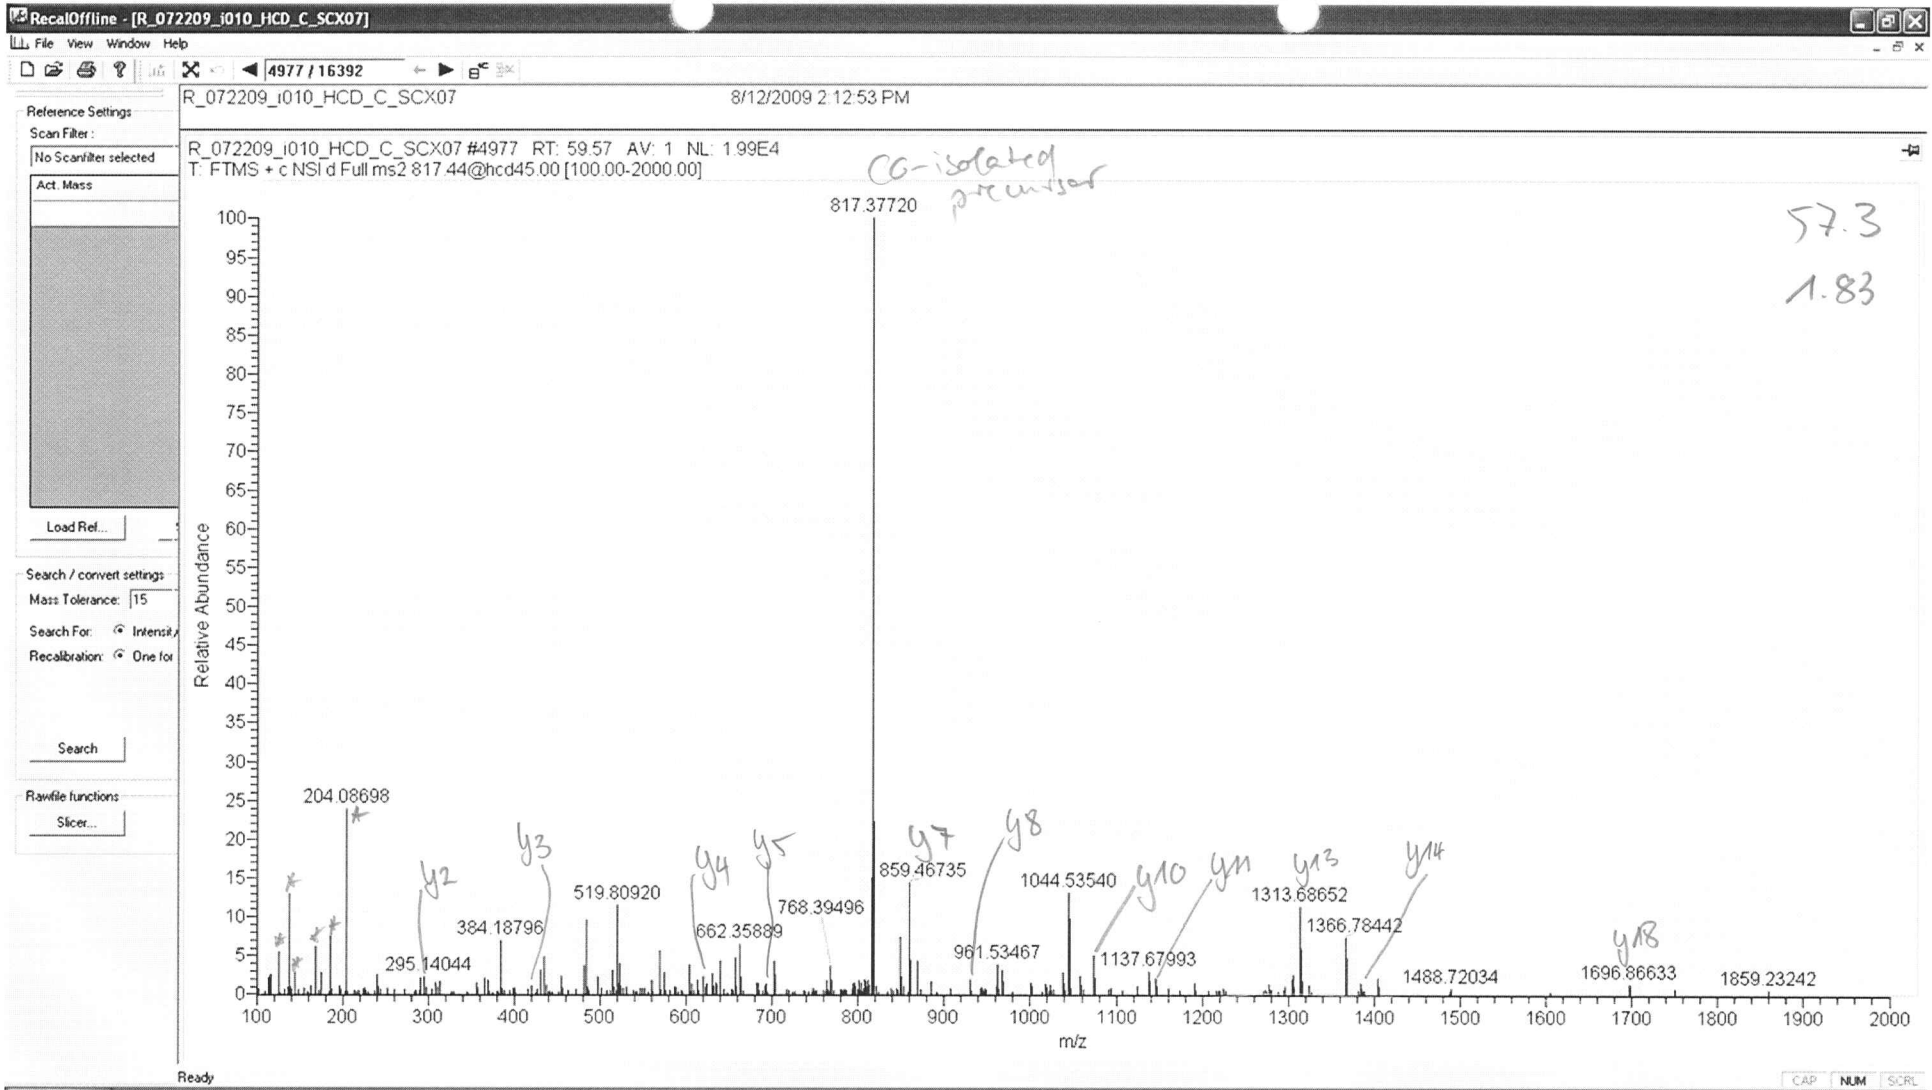

No site evidence

N-term., K33: iTRAQ4plex

IASVPAGGAVAVSAAPGSAAPAAG<sup>y7</sup>sAPAAAEK

178

R\_072209\_i010\_HCD\_D\_SCX12 #3777 RT: 38.30 AV: 1 NL: 2.13E4  
T: FTMS + c NSI d Full ms2 772.03@hcd45.00 [100.00-2000.00]

Reference Settings

Scan Filter:  
No Scan/Filter selected

Act. Mass

Load Ref...

Search / convert settings:  
Mass Tolerance: 15  
Search For: Intensity  
Recalibration: One for

Search

Rawfile functions:  
Slicer...

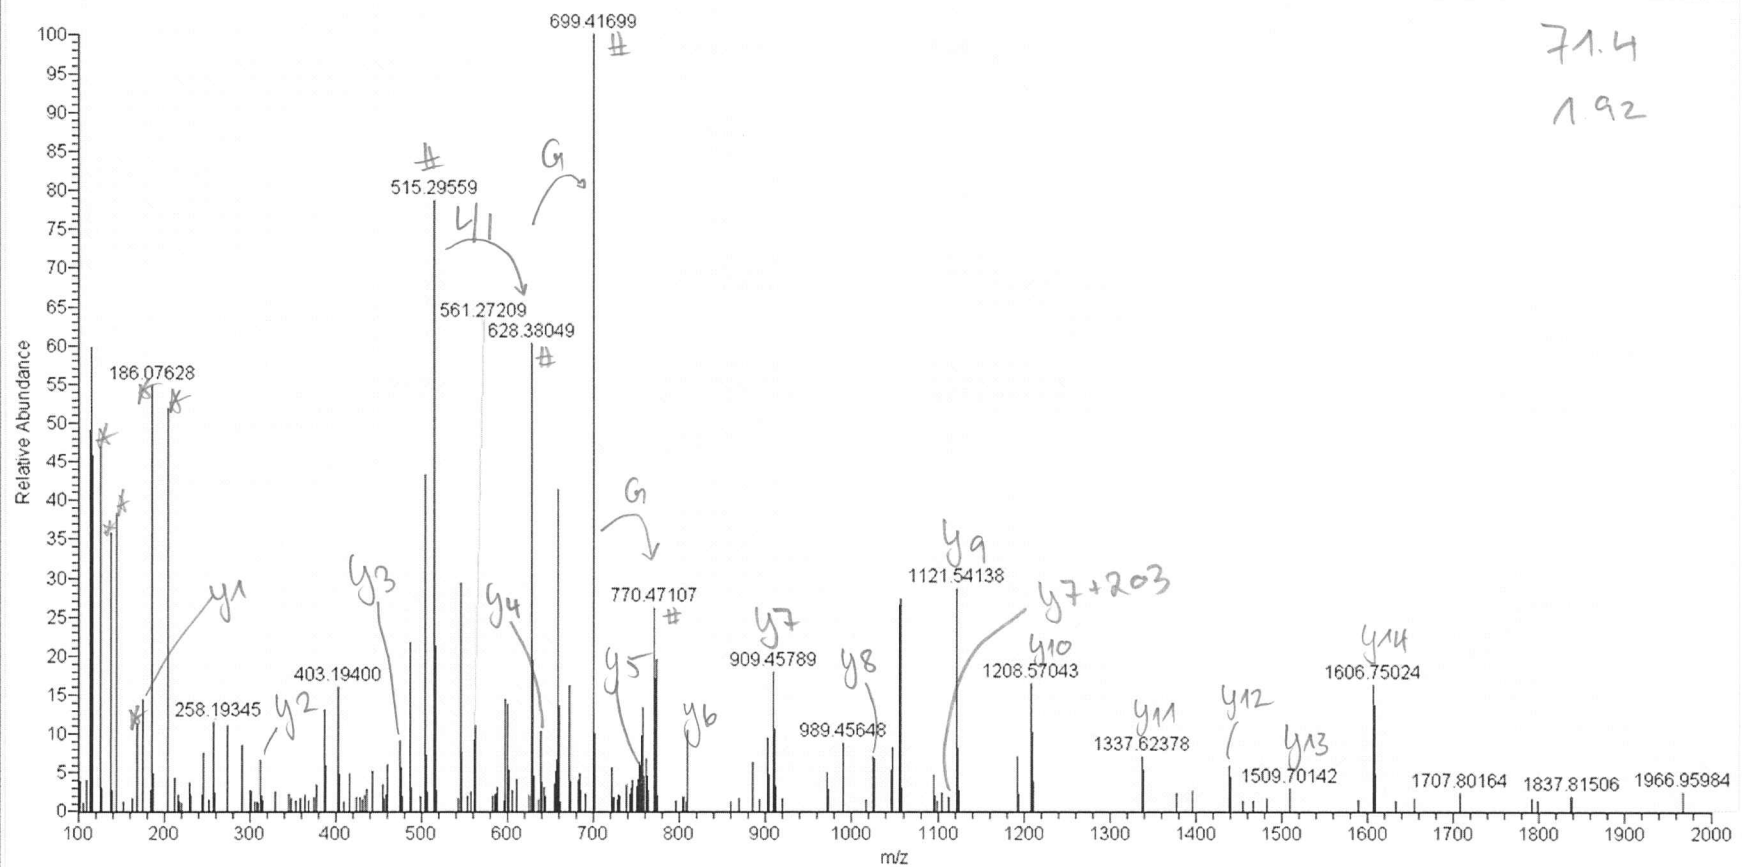

Ready

CAP NUM SCRL

N-term. : ; TRAQ4plea

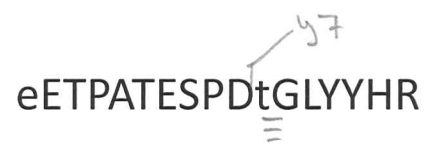

TAM

# chimeric spectrum;  
2nd ion series from  
co-isolated  
precursor

179



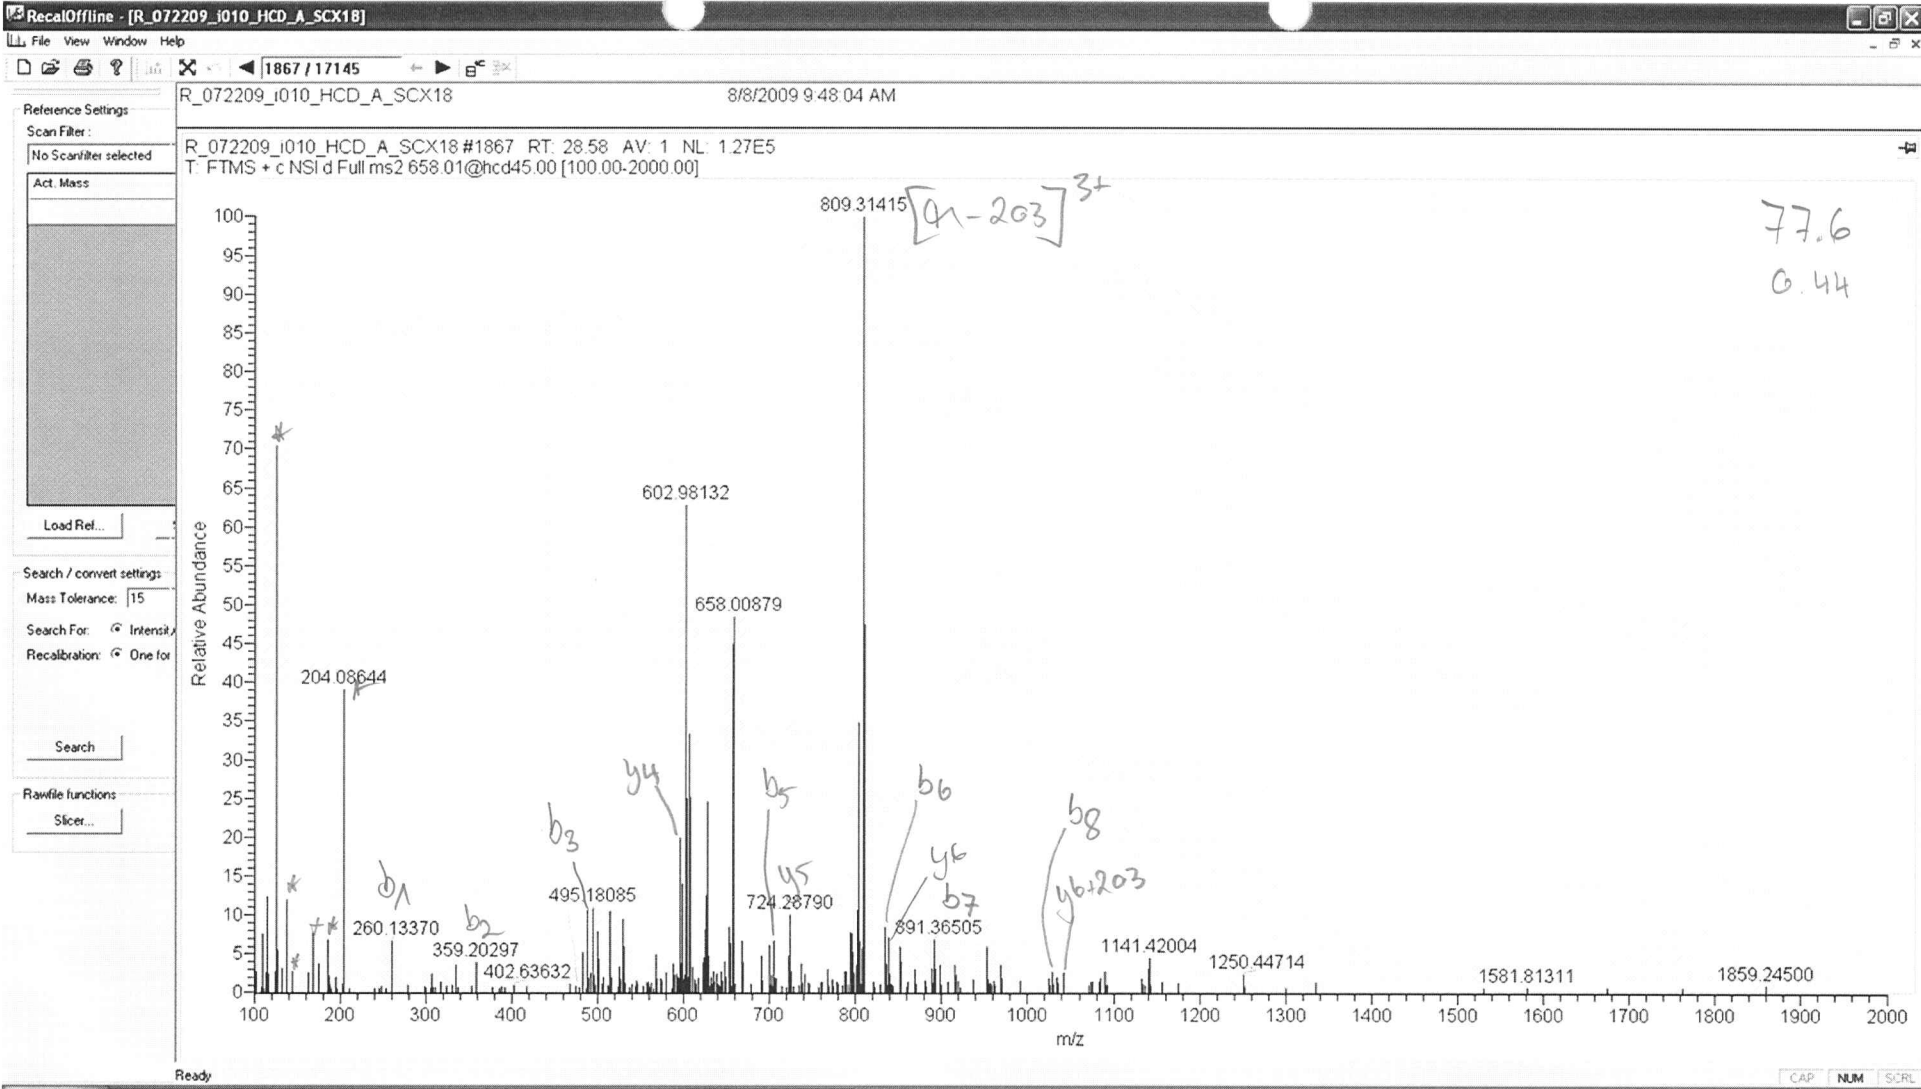

dVEcGEGHFcHDNQtcCR

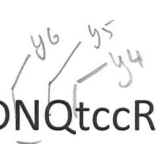

N13

N-term. iTRAQ4plex

180



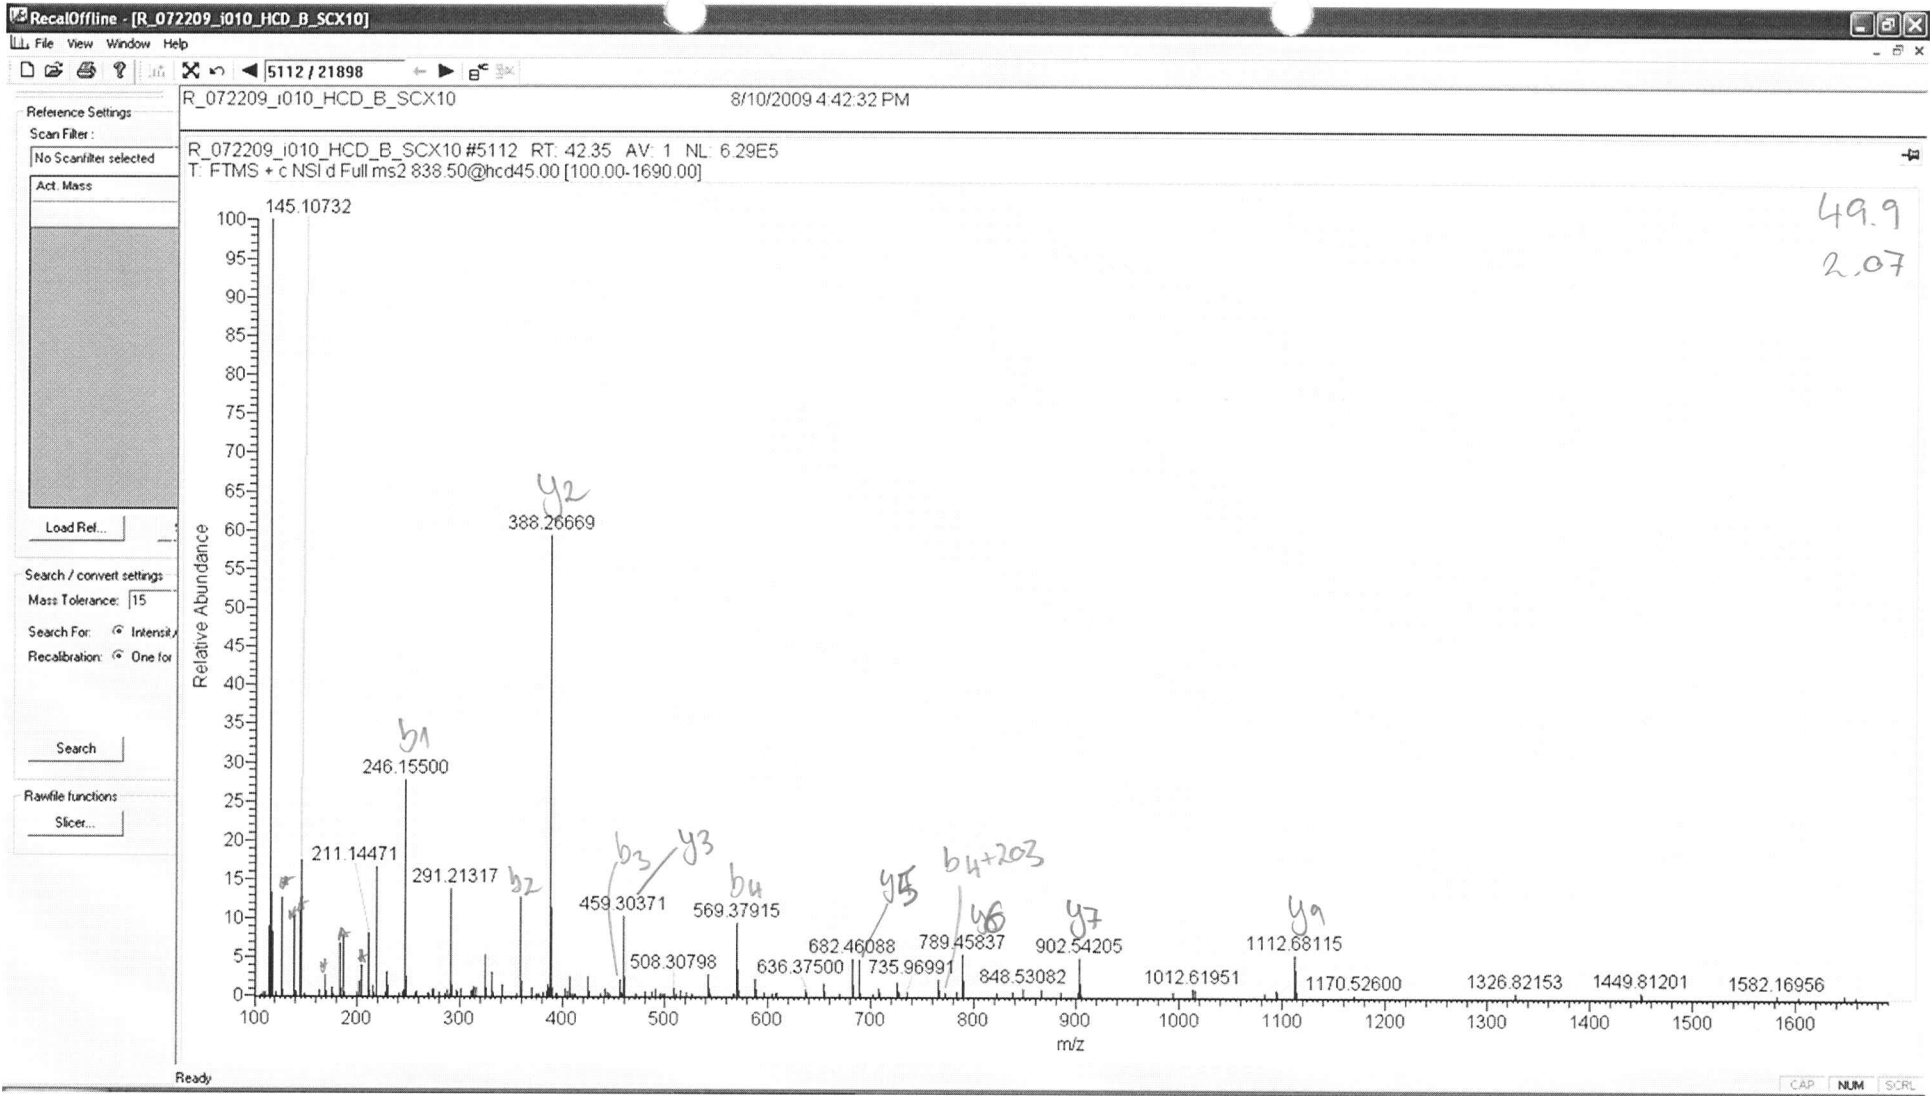

tLPILtQAPk

b4

T1:  
 2nd site unknown  
 b-term, V11: ;TRAGplex  
 182

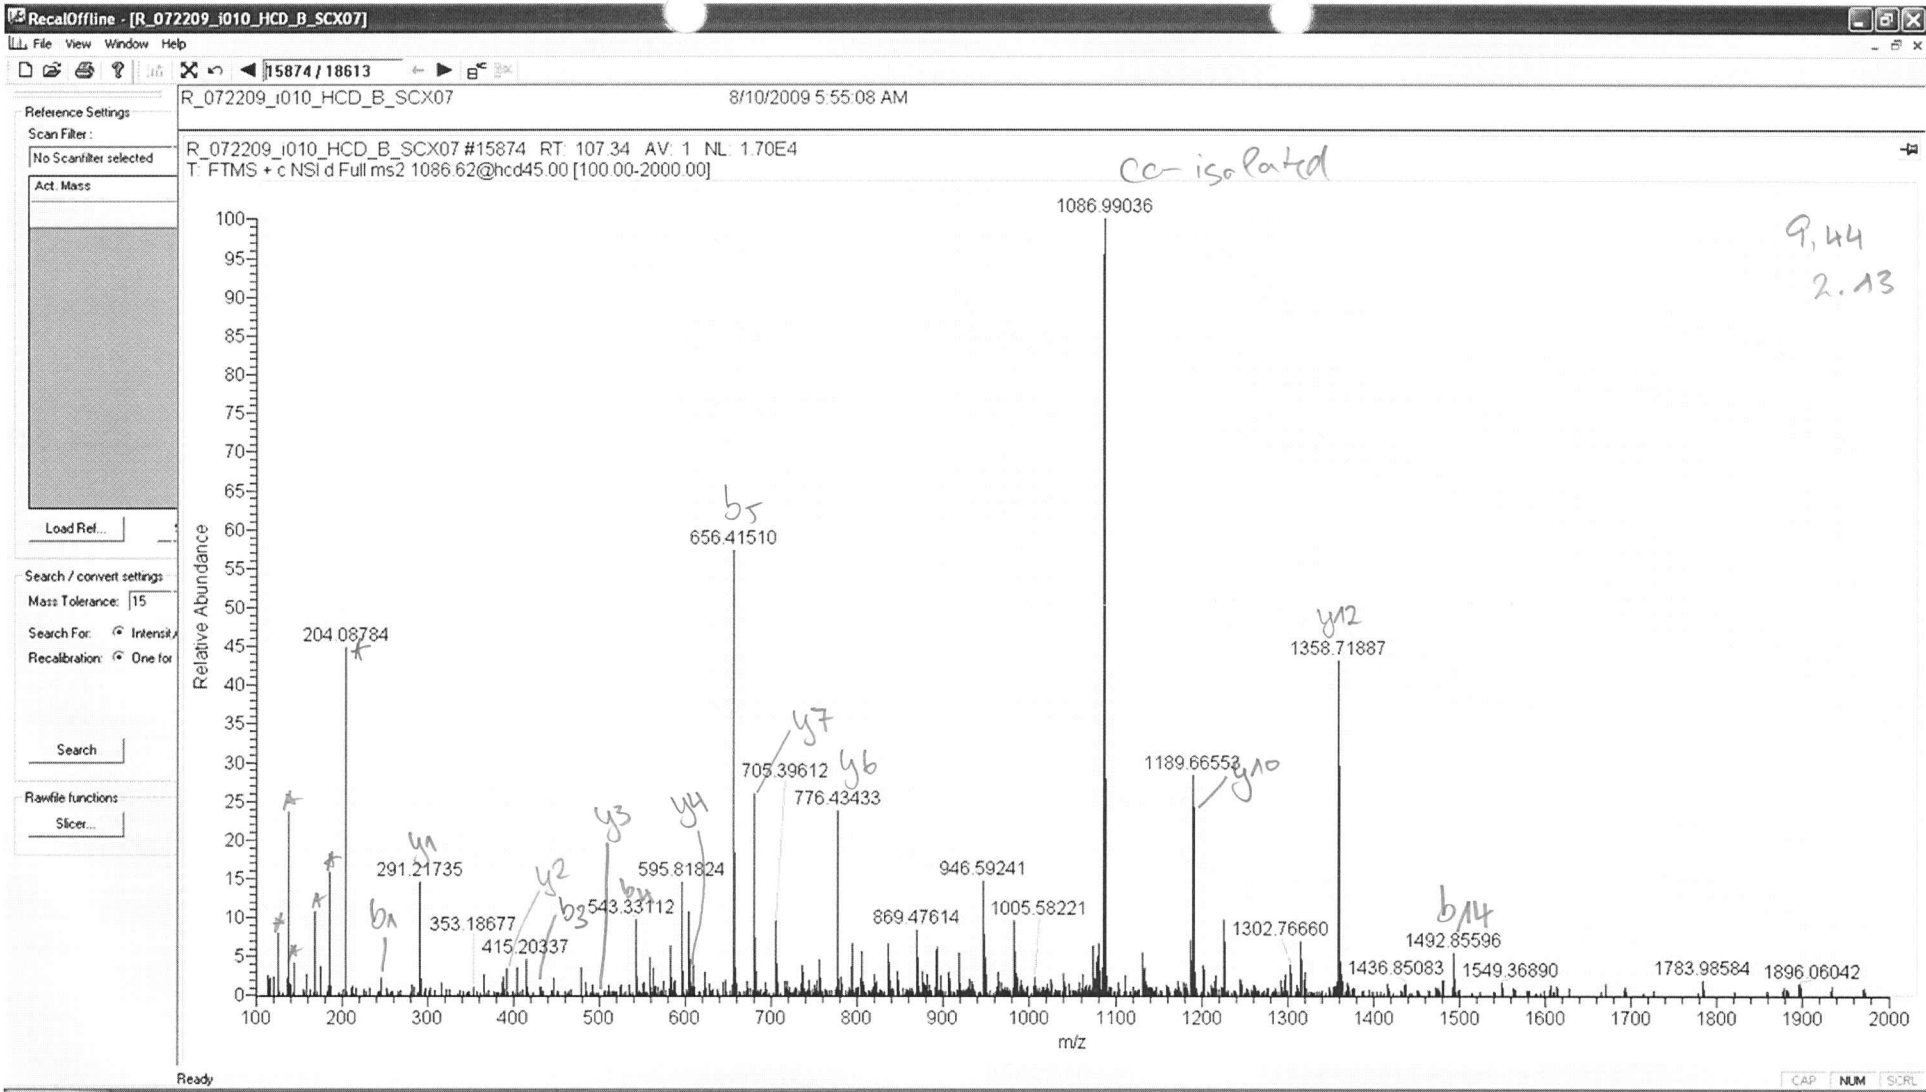

tPSLLPPLGLSQSGPPLLSPSFDSKPTTLLGLIPAP<sup>y12</sup>  
SMVPATDtk<sup>y7 y8 y9</sup>

No site evidence  
No term, V27, V48:  
iTRAQ 4plex

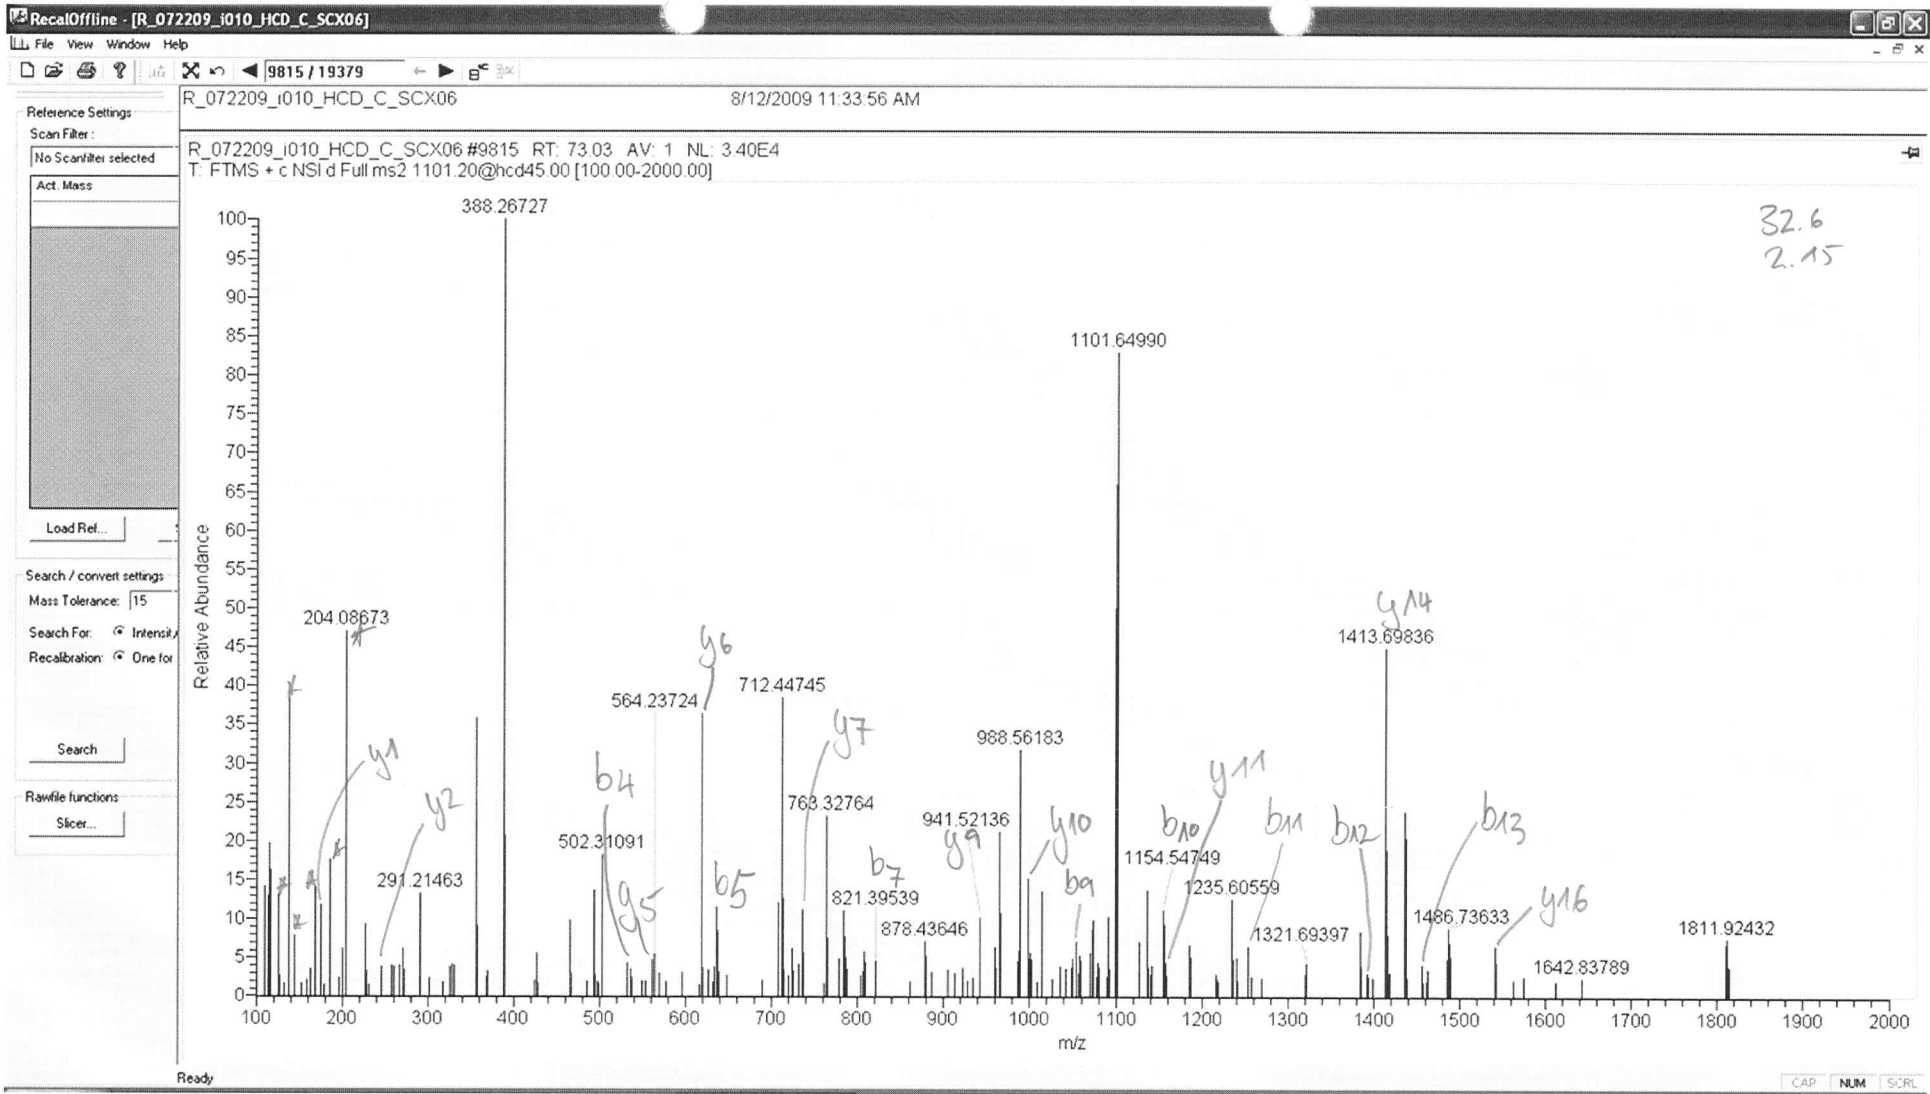

no hit evidence  
no term: iTRAQ4plex

qTSATSTTMTVMATGAPcsAGPLLGPy14SMARy9

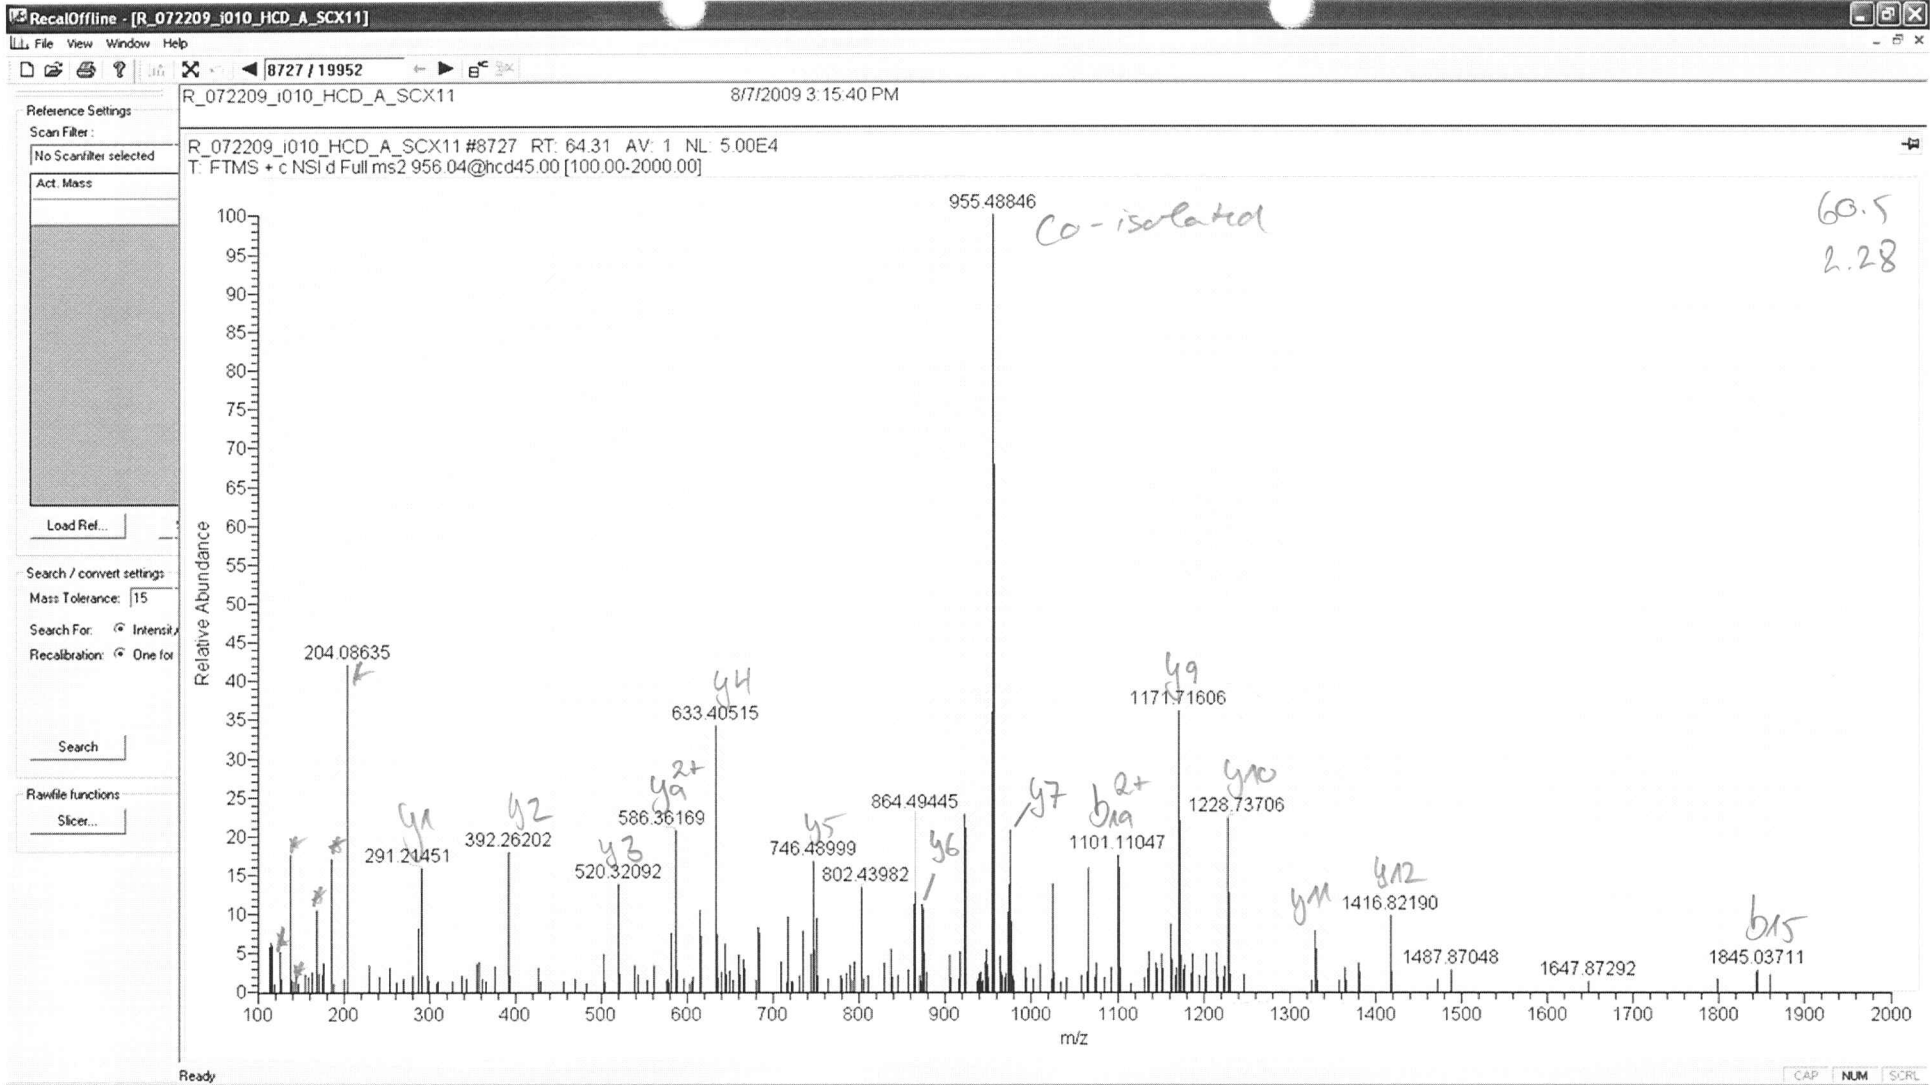

vMSVVQtkPVQTSAVTGQASTGPVTQIIQtk

No write evidence  
 U-term, U8, U31: iTRAC 4plex

185

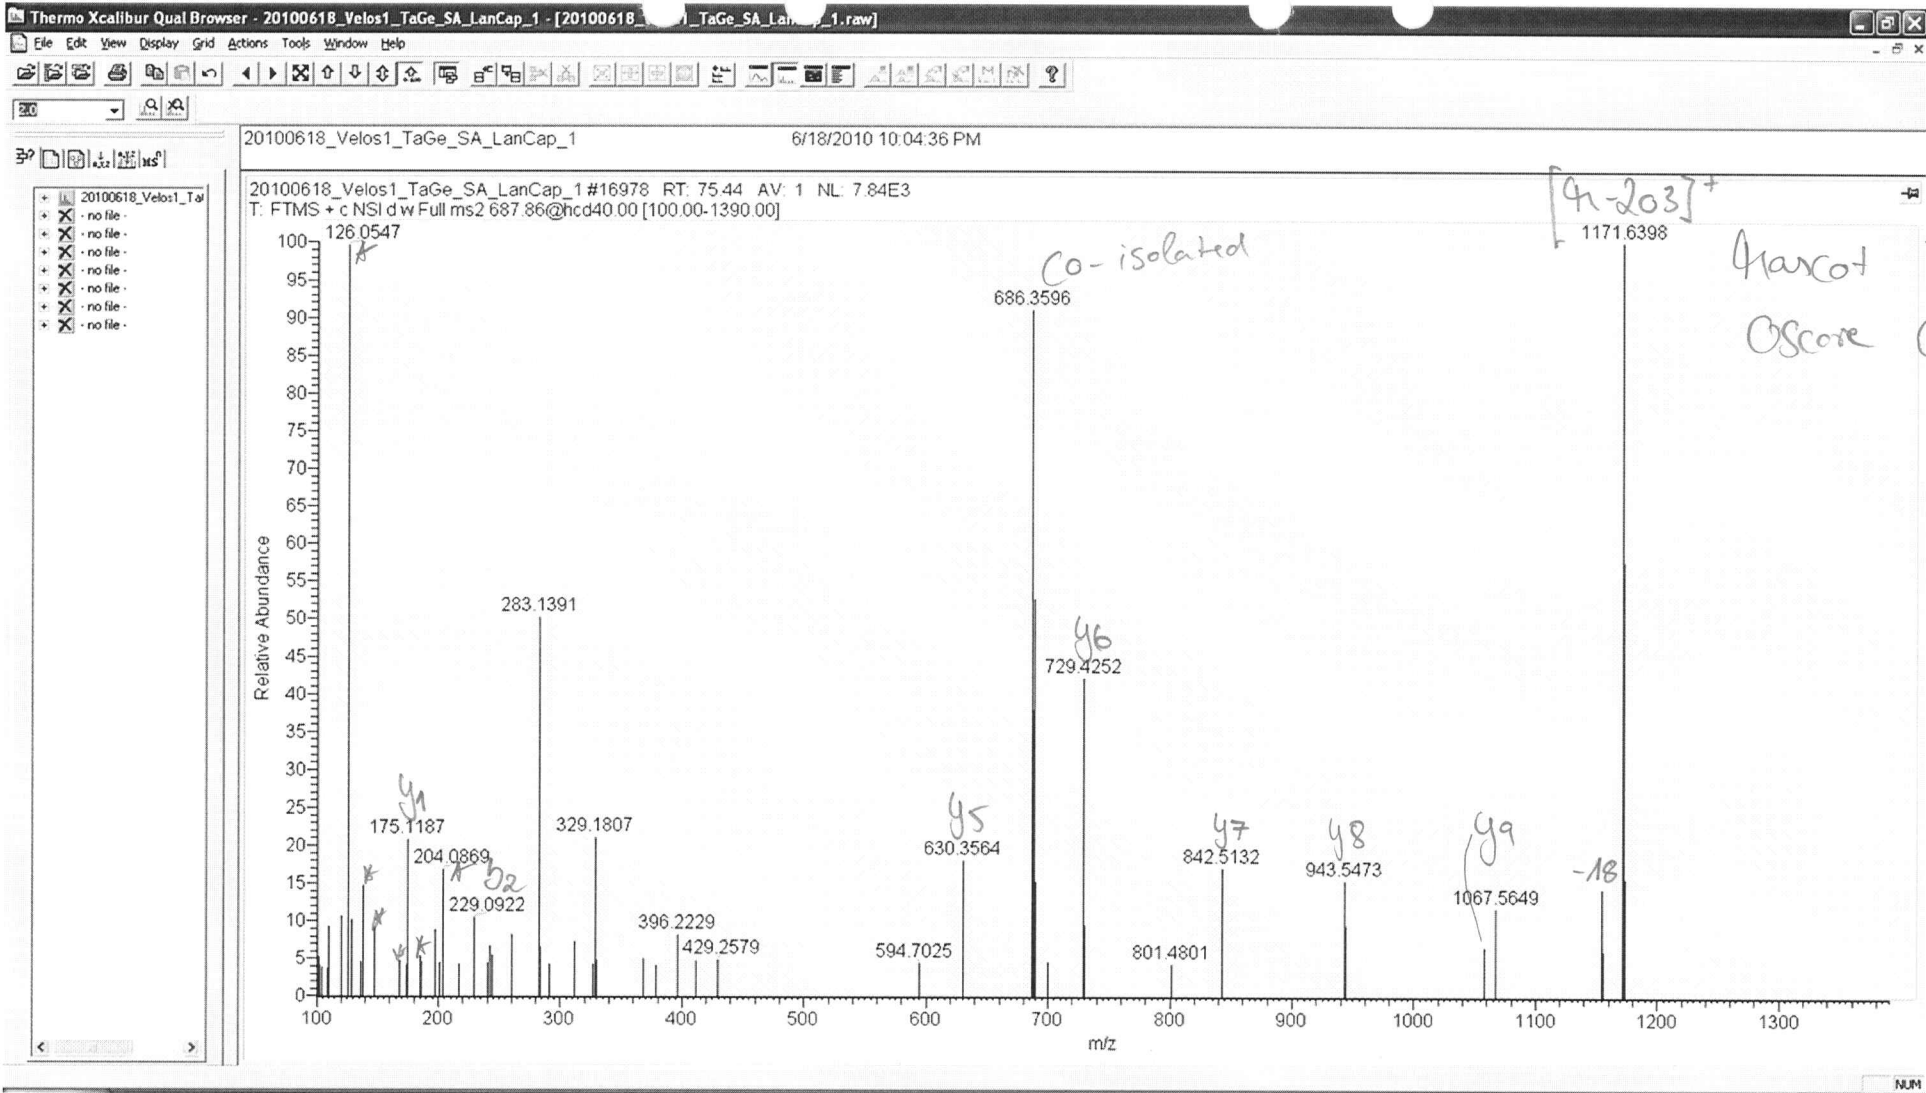

NNTIVnELVR

No site  
evidence

186

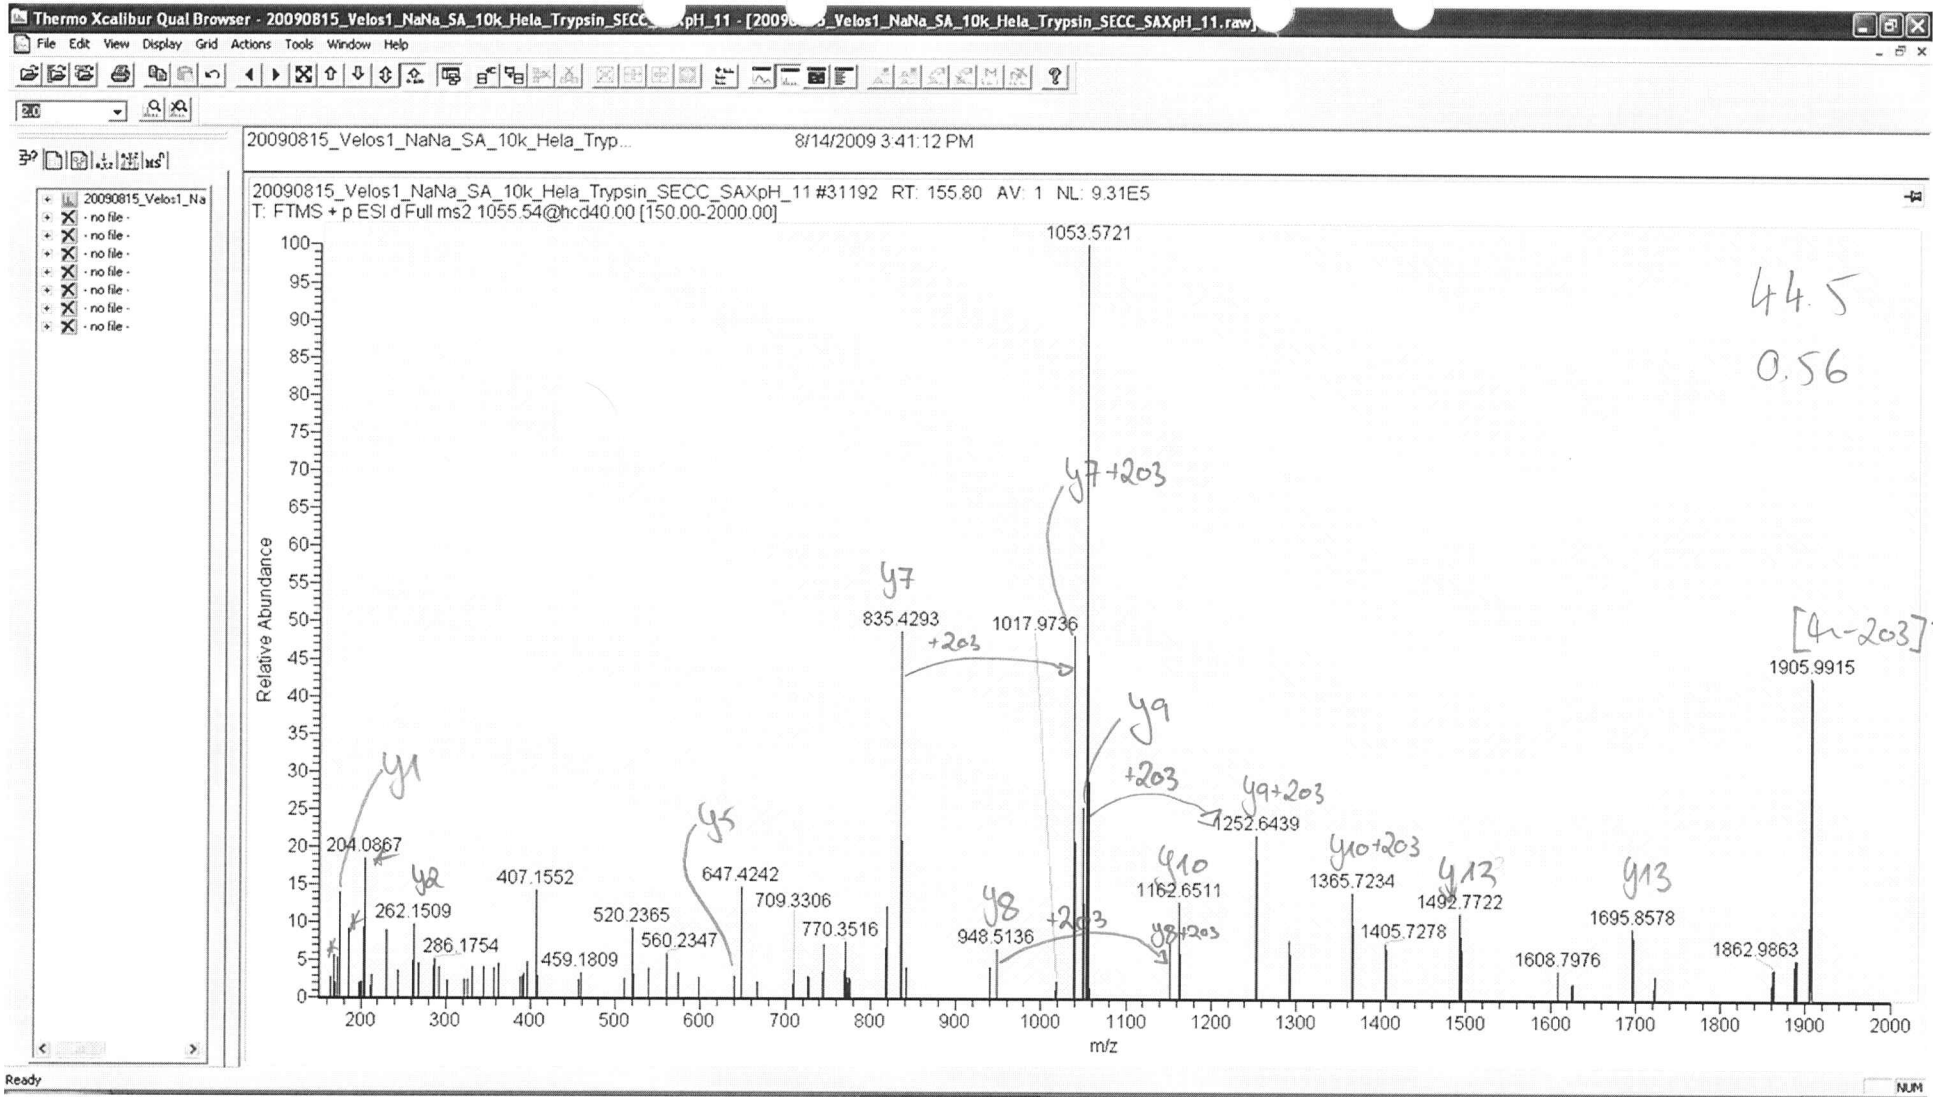

LATQSNEITIPVTFE\_S\_R

T13 or S16

187



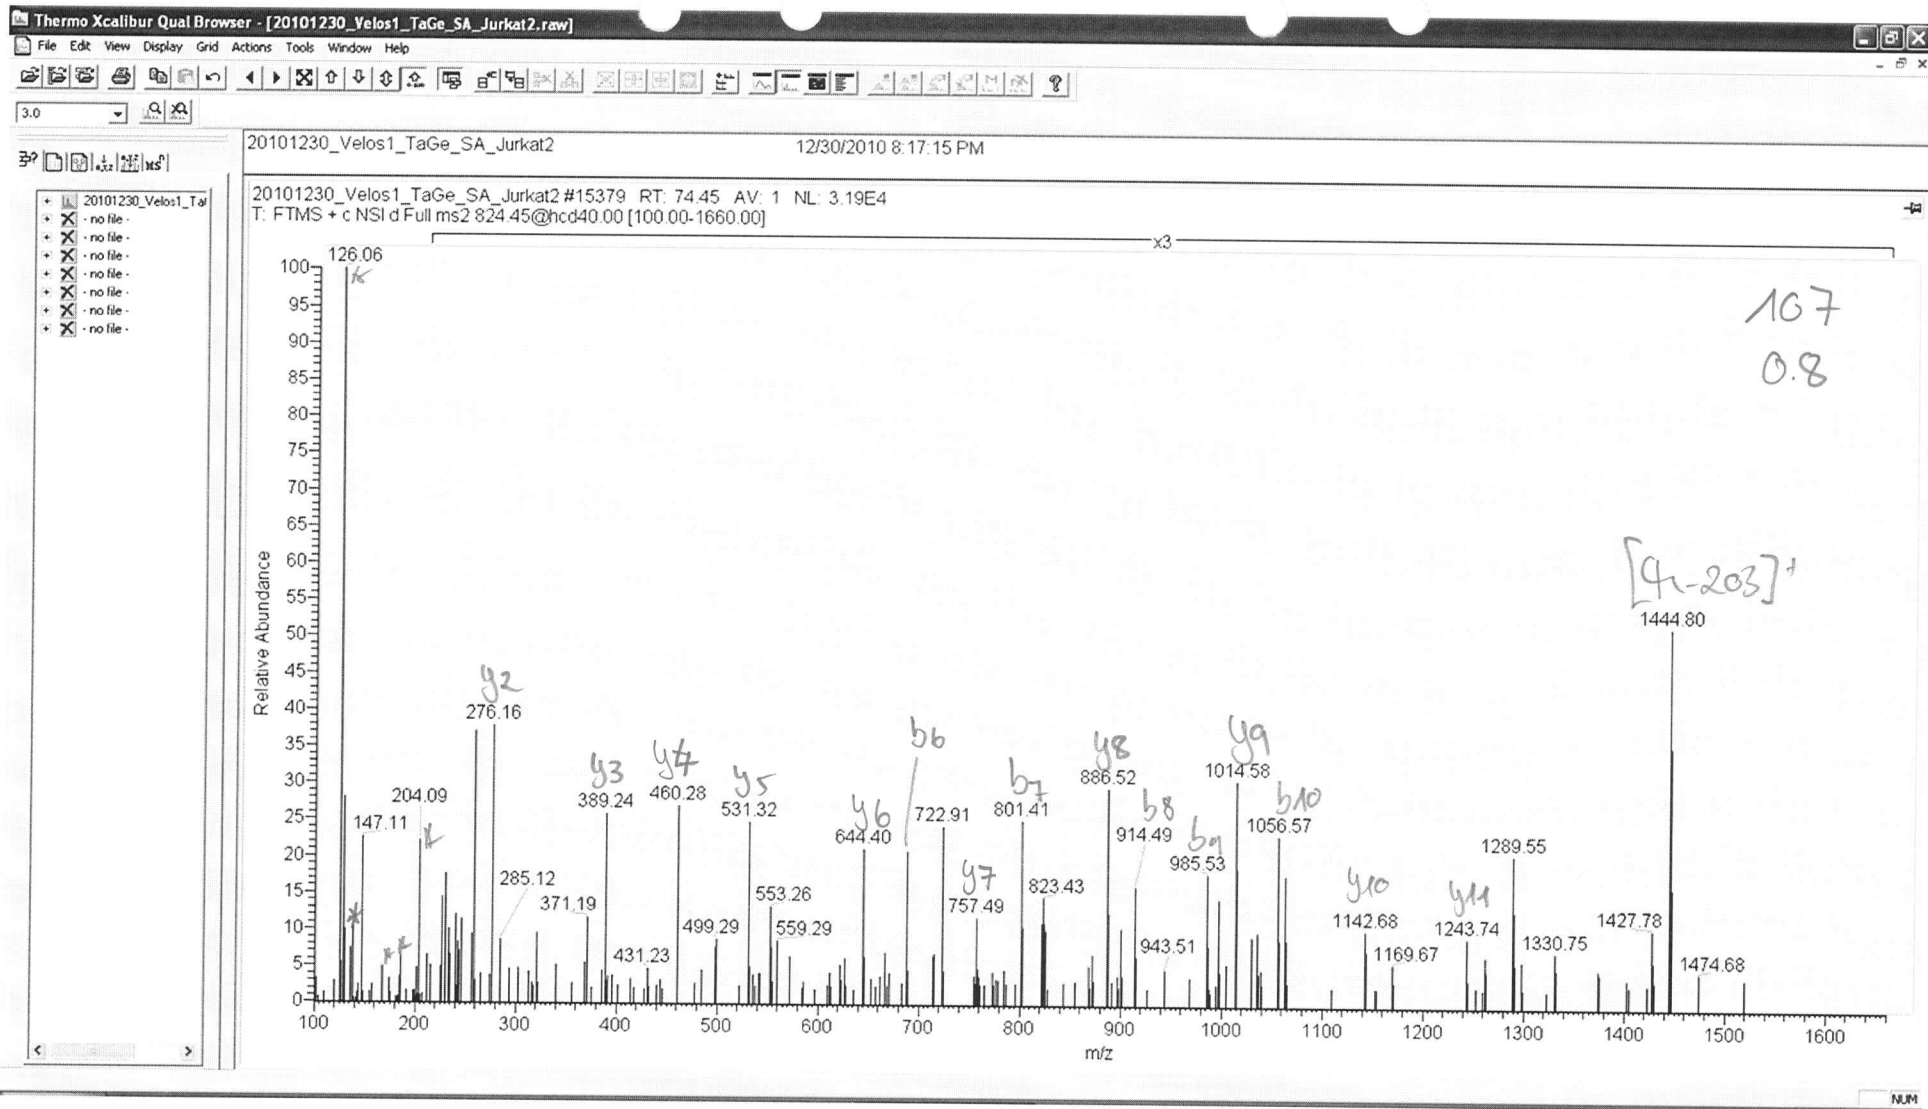

No site evidence

NStKQEILAALEK

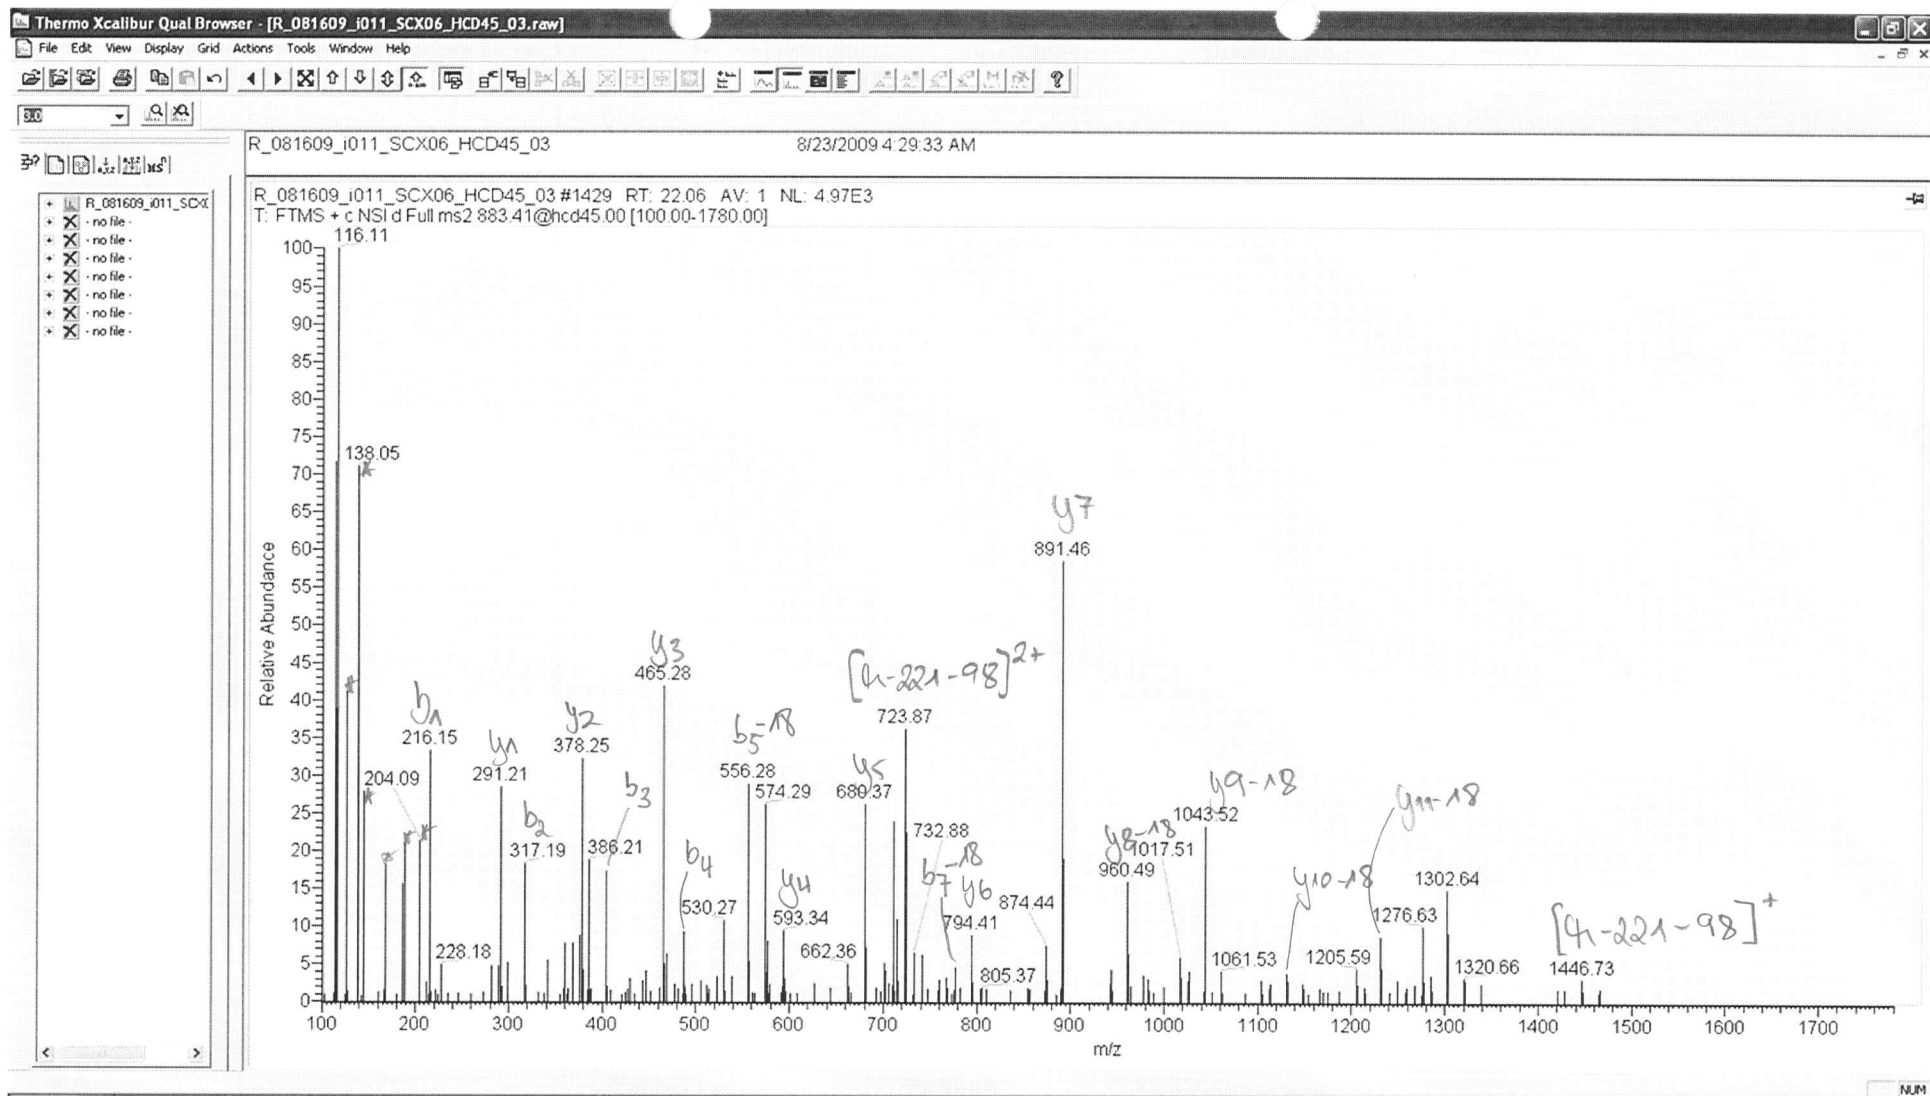

No site evidence  
for O-glcNAc

SS: phospho

189: aTSTpNSQSsk

(1 O-GlcNAc site, 1 phospho-site, Mascot score = 77.7, Oscore = 1.78)

N-term., U12: iTRAQ4plex

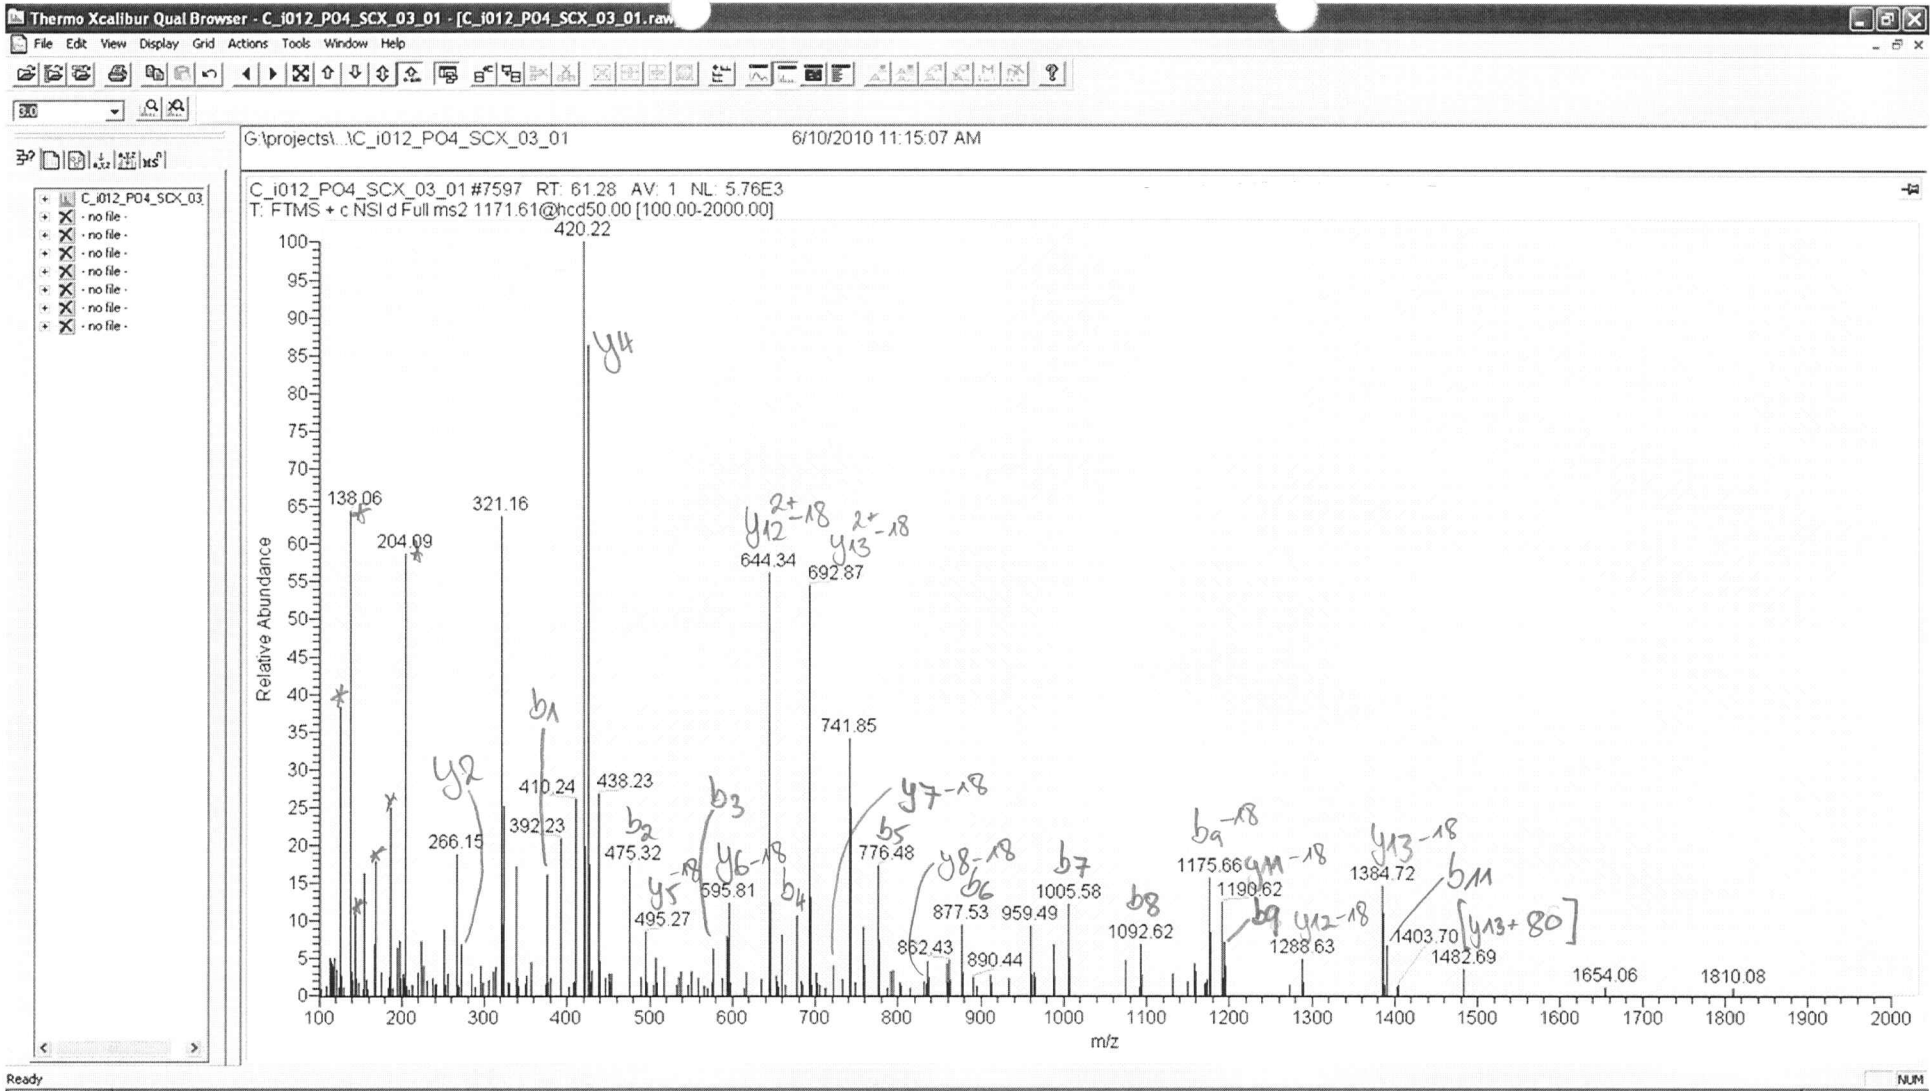

190: aVTTVTQSTPVPGPSVPPPEELQVsPGPR

(1 O-GlcNAc site, 1 phospho-site, Mascot score = 65.8, Oscore = 1.83)

S25: phospho  
O-glycNAc site unknown  
N-term :TRAG 8 plex

y3 P I y2

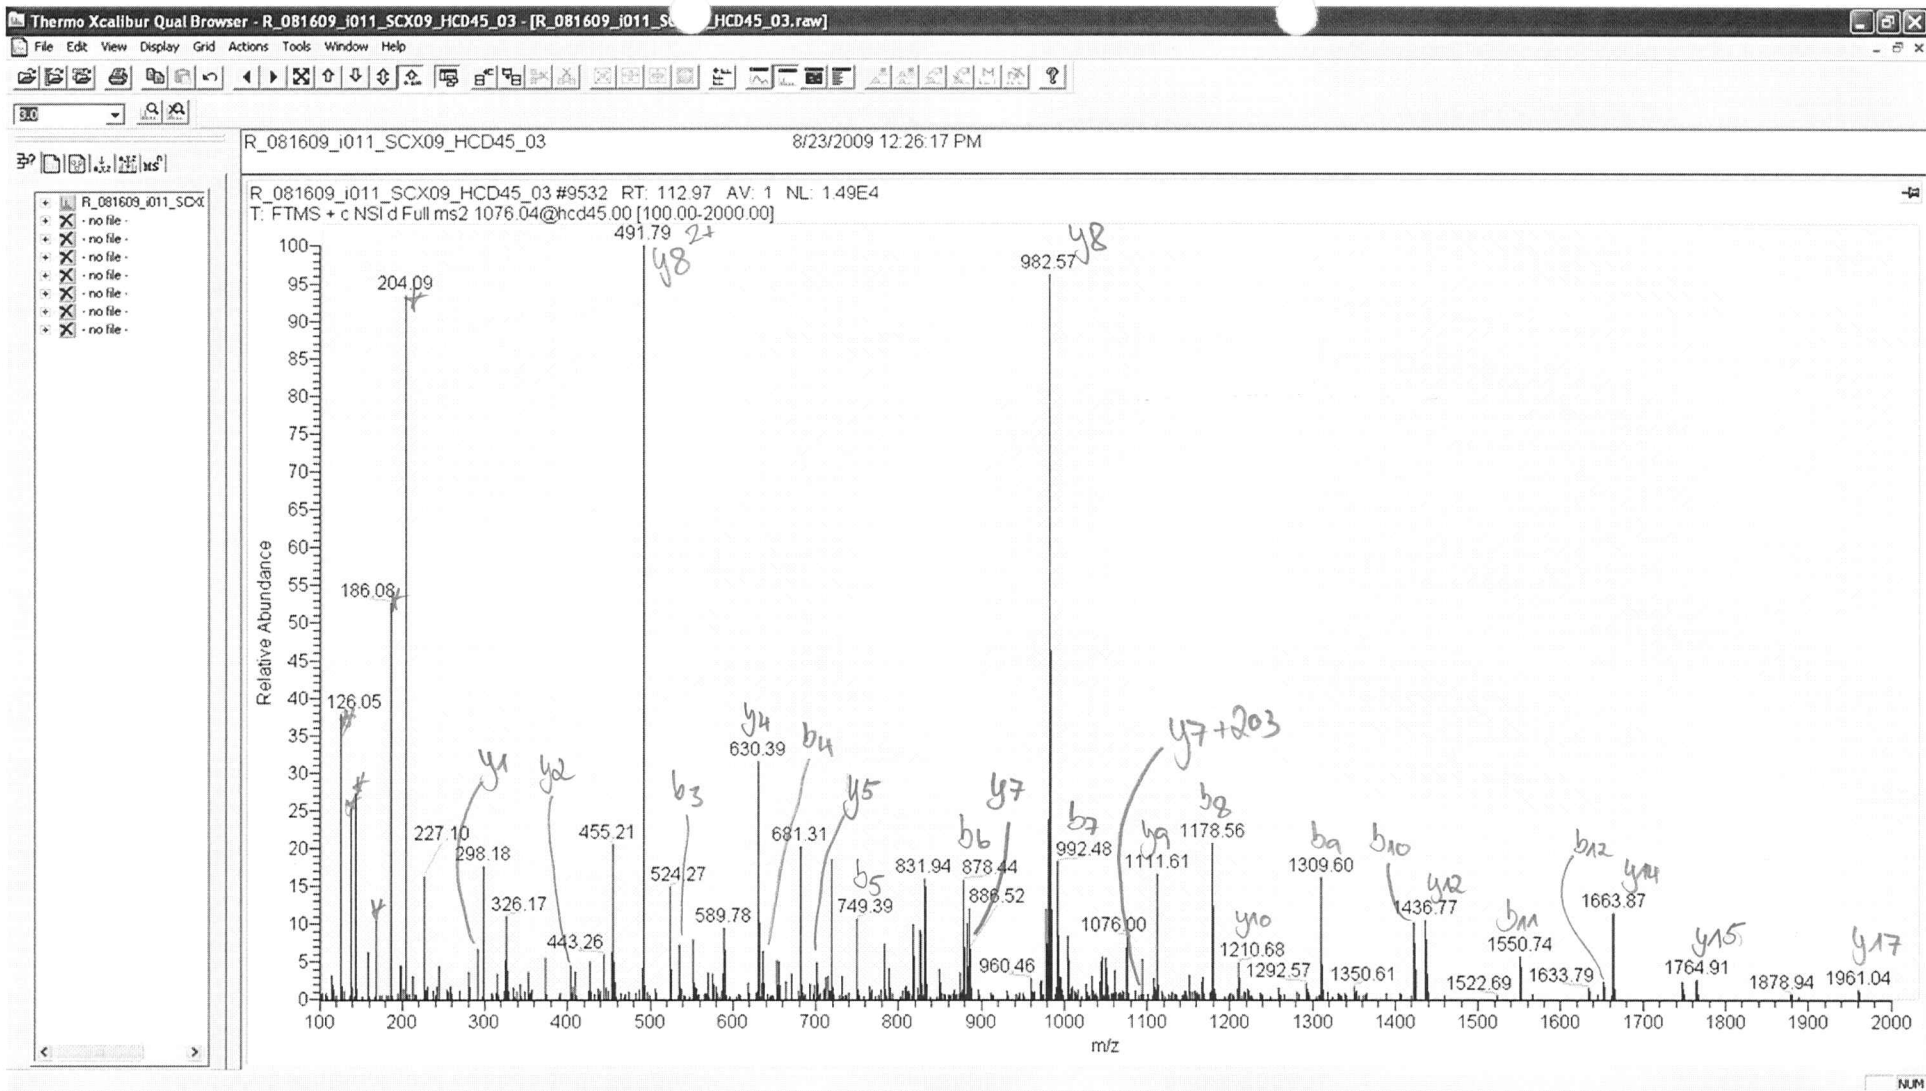

S28: O-GlcNAc

N-term., K33: iTRAQ 8plex

191: dFQTLLENWMLQTLNEEPVTPEPEVEPPsAPELk

(1 O-GlcNAc site, 0 phospho-site, Mascot score = 86.3, Oscore = 1.53)



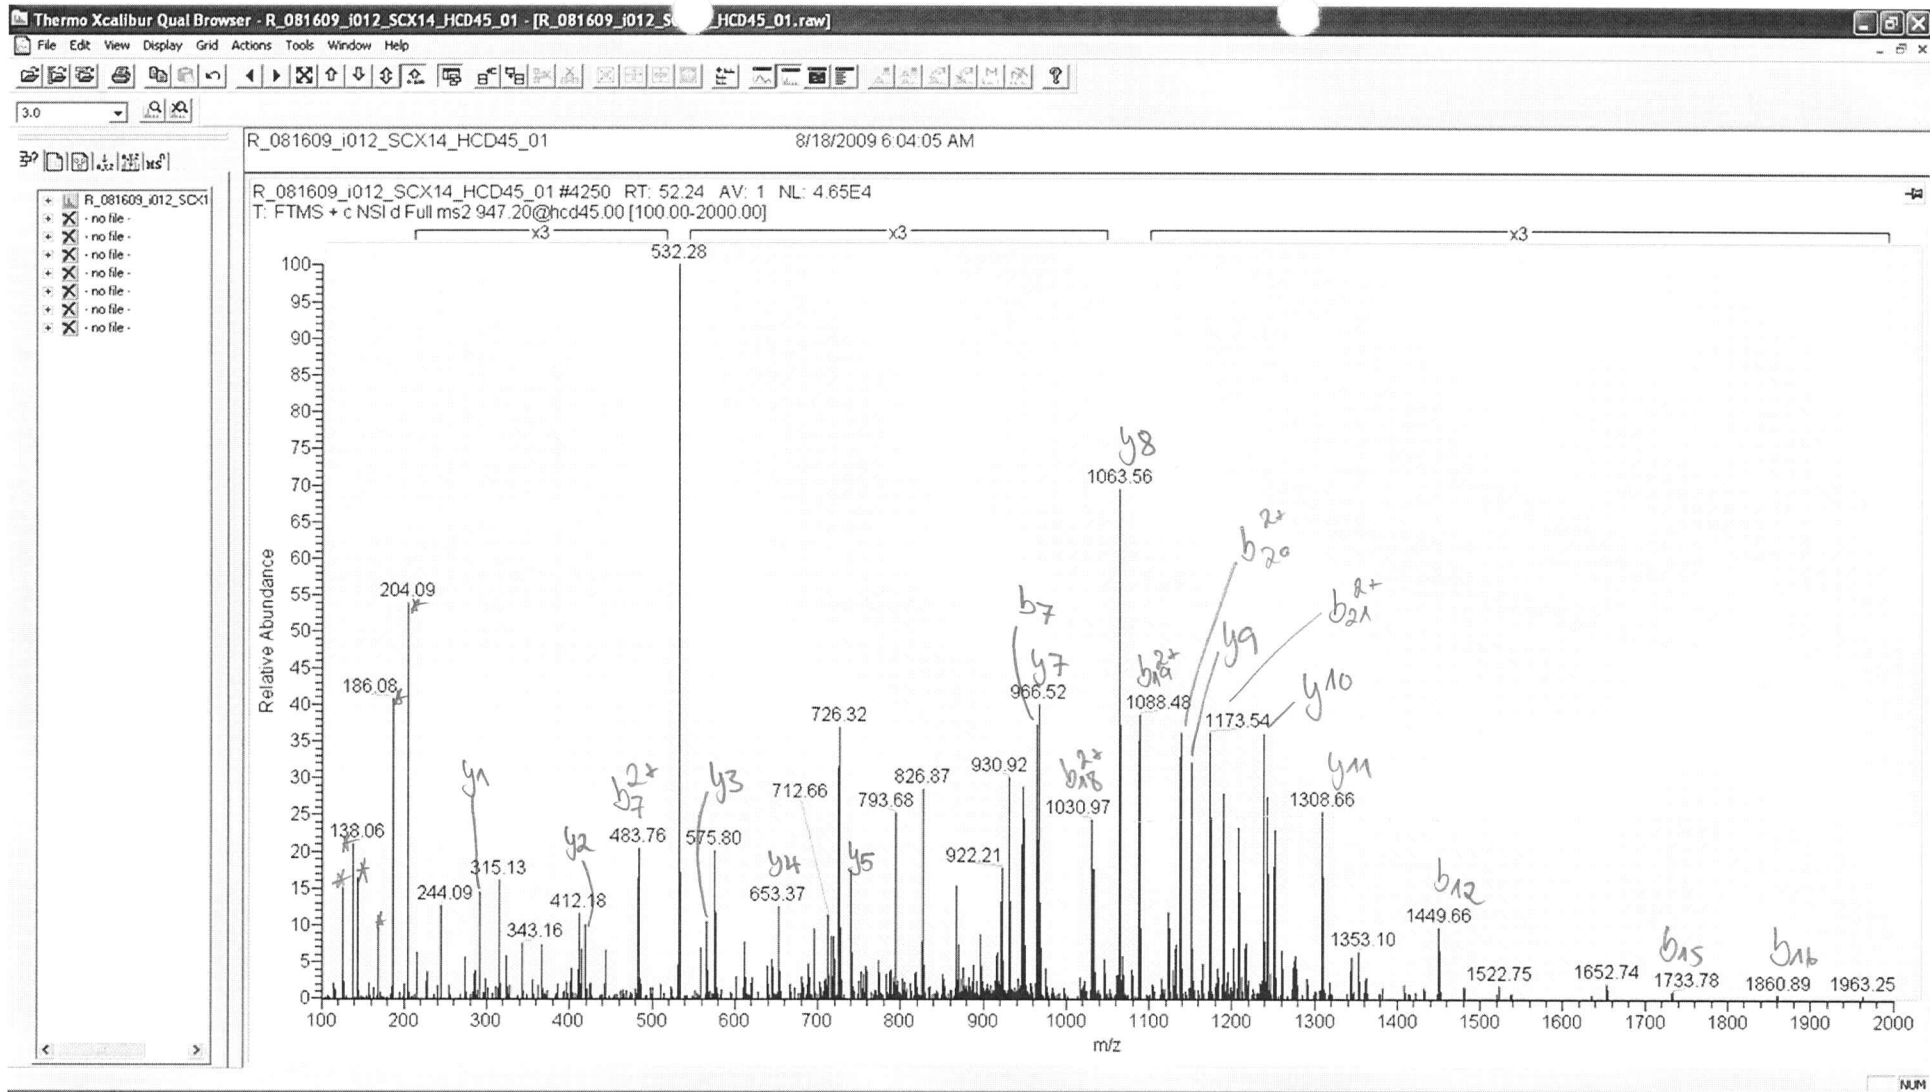

No site evidence

N-term., K31: iTRAQ4plex

193: eFHHGPDPTDTAPGEQAQDVASSPPESsFQk

(1 O-GlcNAc site, 0 phospho-site, Mascot score = 68.8, Oscore = 1.71)

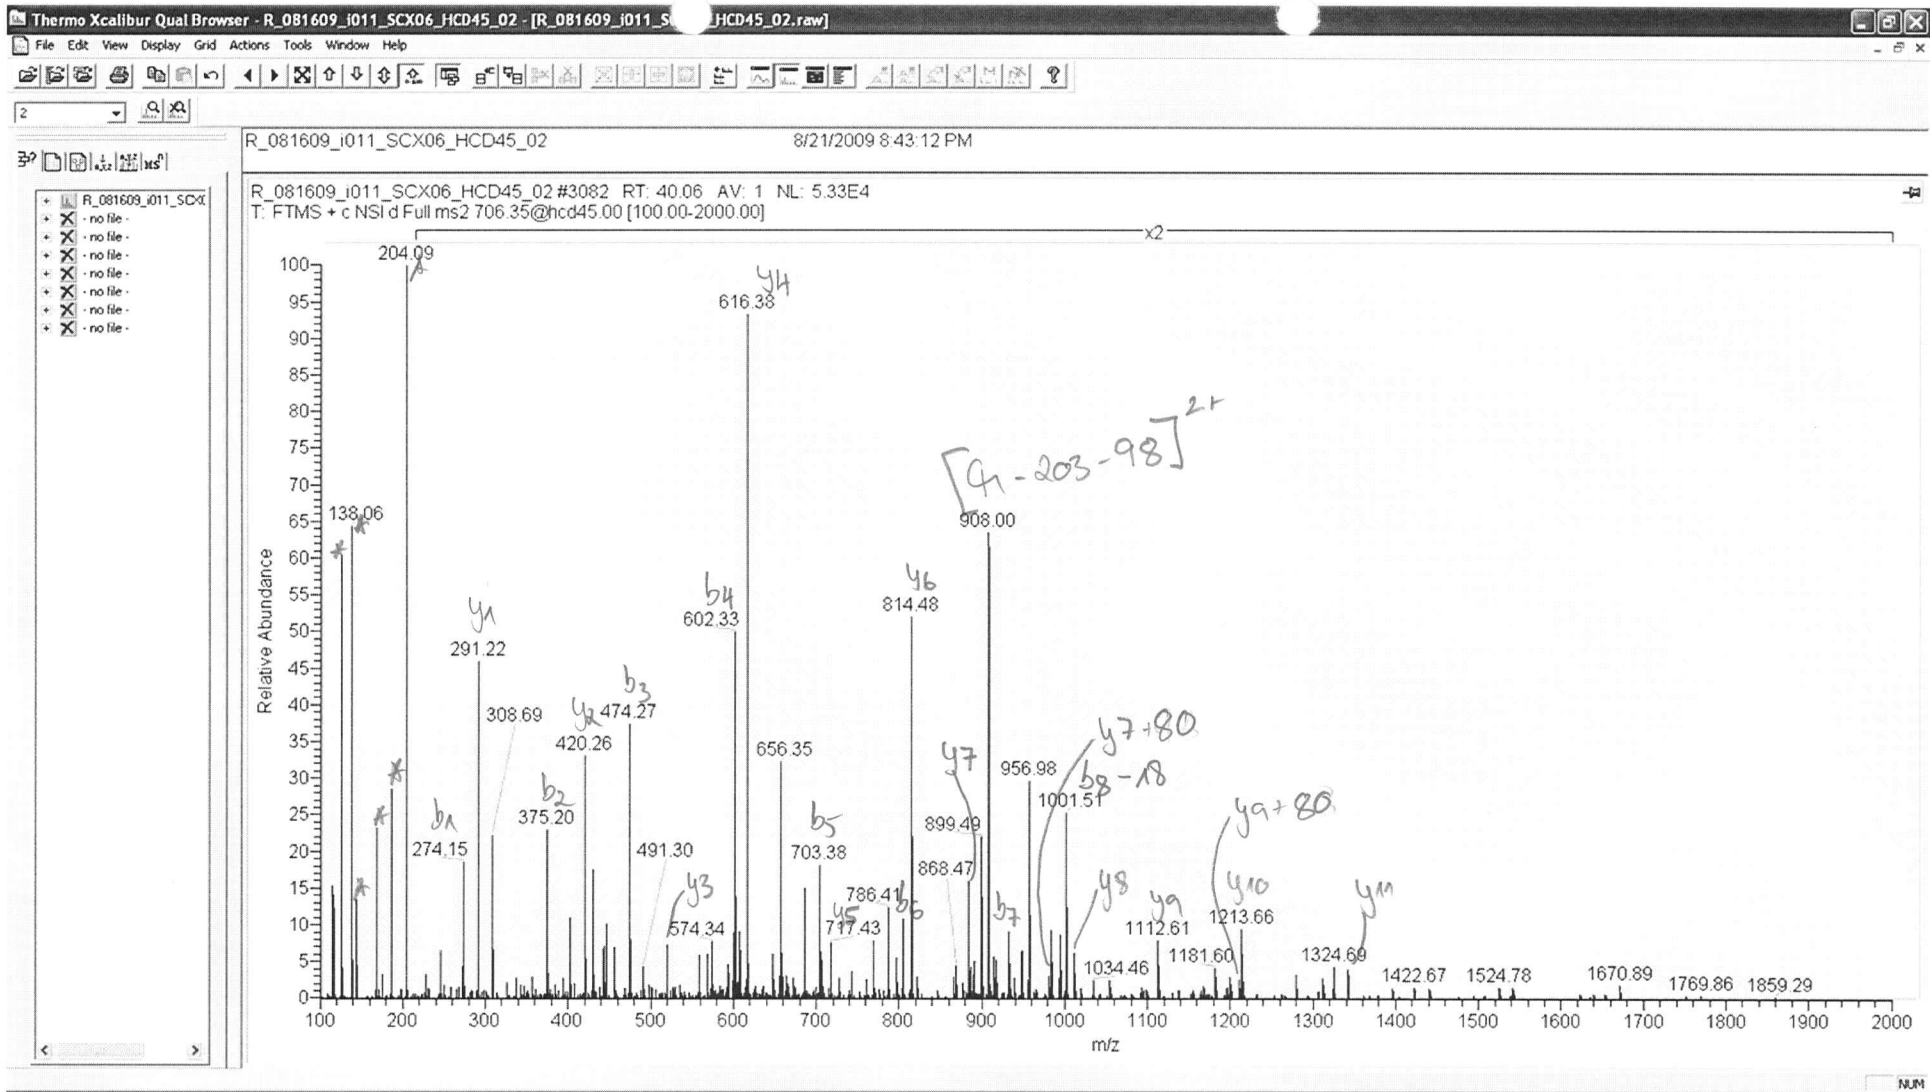

S8: phospho  
O-glcNAc site unknown  
N-term., K14: iTRAQ 4plex

194: eTVQTtQsPTPVEK  
 $\begin{matrix} y_9 & y_7 \\ / & \backslash \\ b_8 \end{matrix}$

(1 O-GlcNAc site, 1 phospho-site, Mascot score = 63.5, Oscore = 0.91)



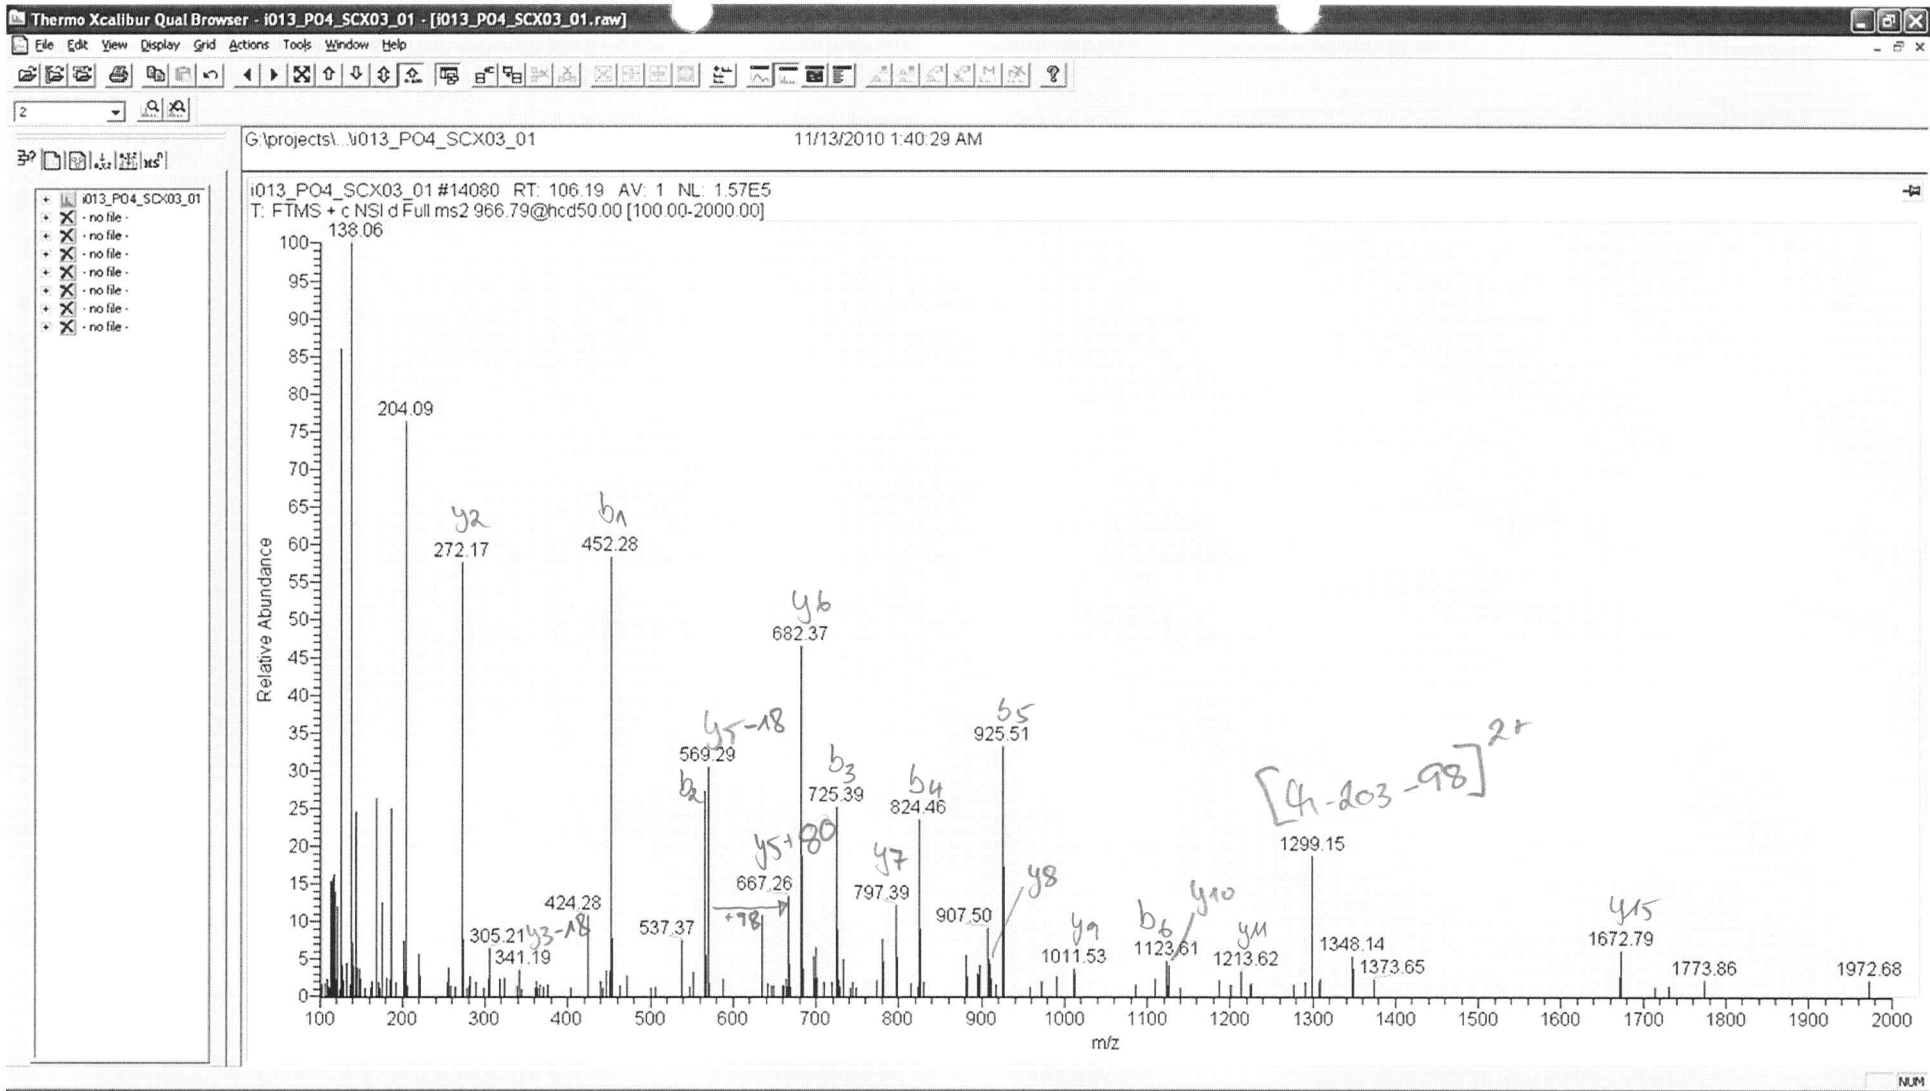

S18: phospho  
O-glcNAc site unknown  
N-term. iTRAQ 8plex

195: flcVTPTTcSNtIDLPMsPR  
(1 O-GlcNAc site, 1 phospho-site, Mascot score = 78, Oscore = 0.87)



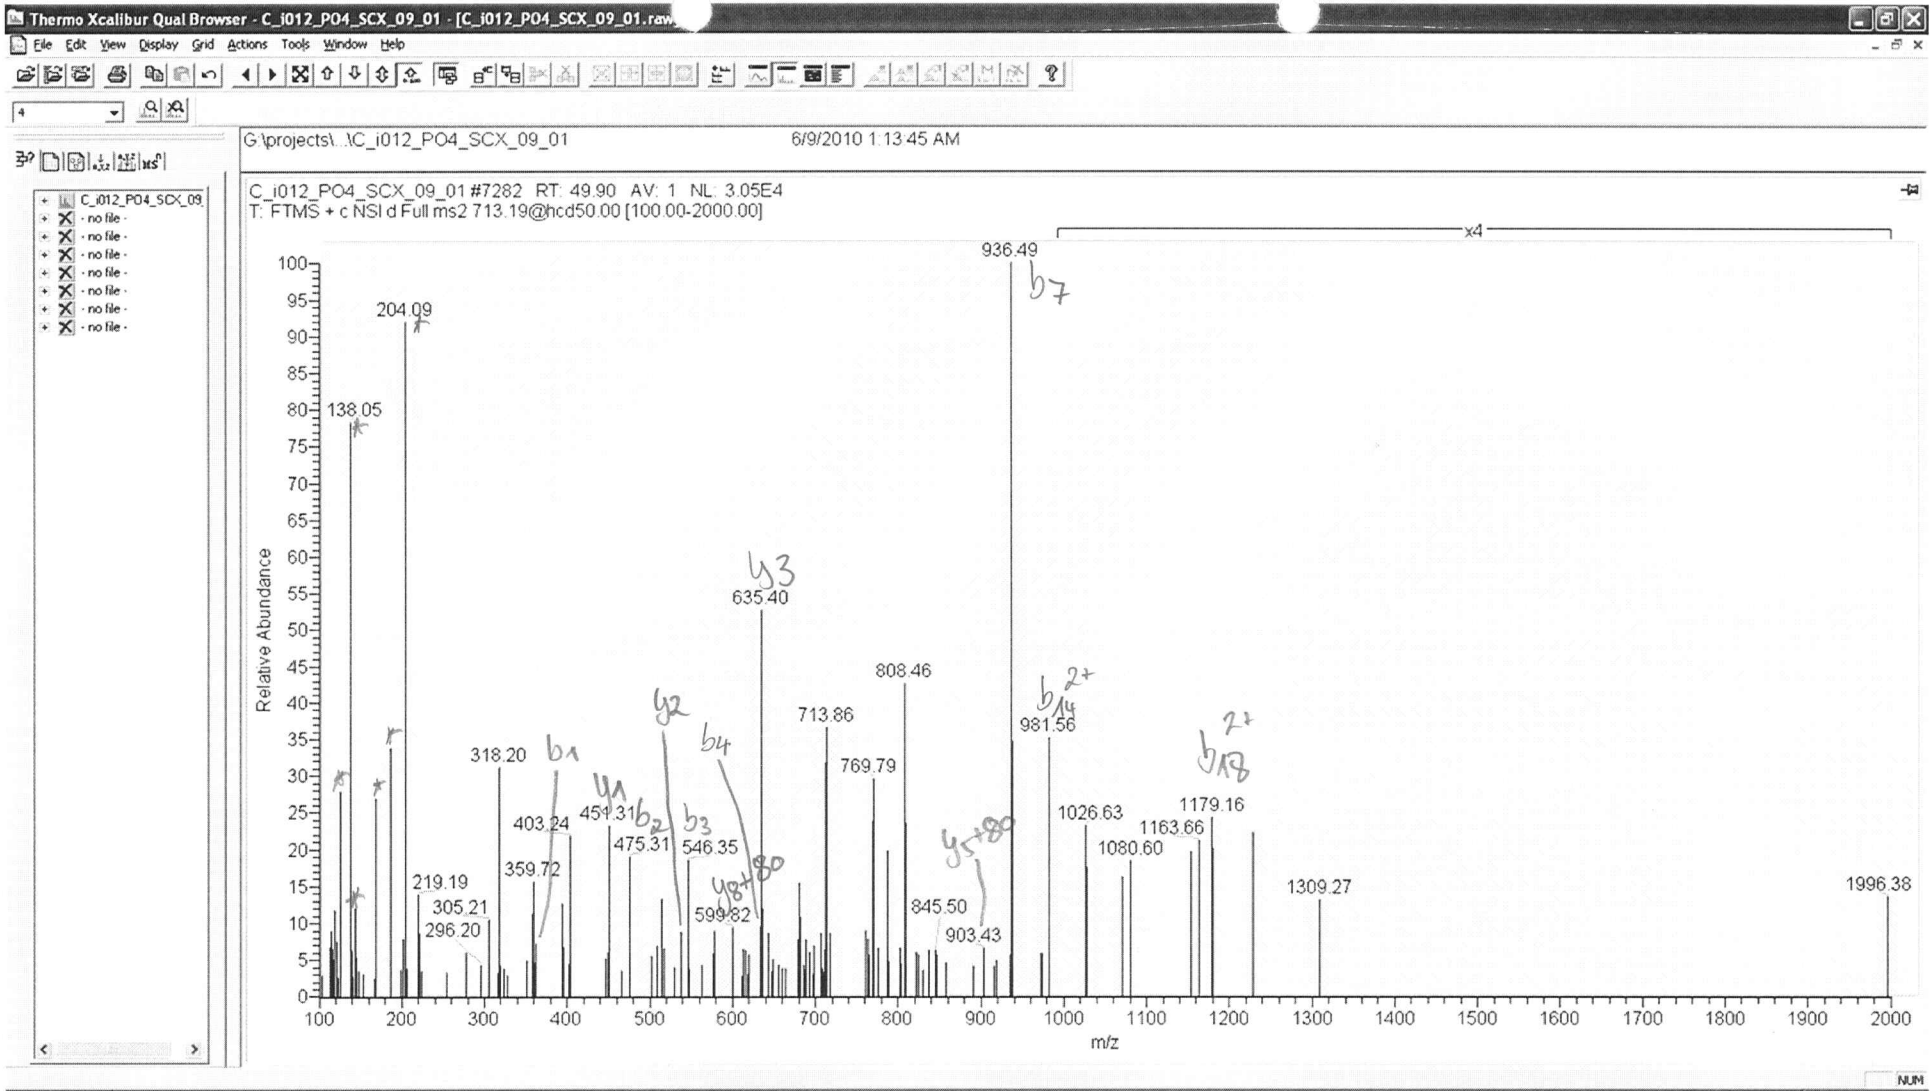

No site evidence for O-GlcNAc  
 phospho @ S20 or T21  
 N-term., K14, K24 iTRAQ 8plex

196: gIASTSDPPTANIKPTPVVStPsk  
 (1 O-GlcNAc site, 1 phospho-site, Mascot score = 31.5, Oscore = 1.72)

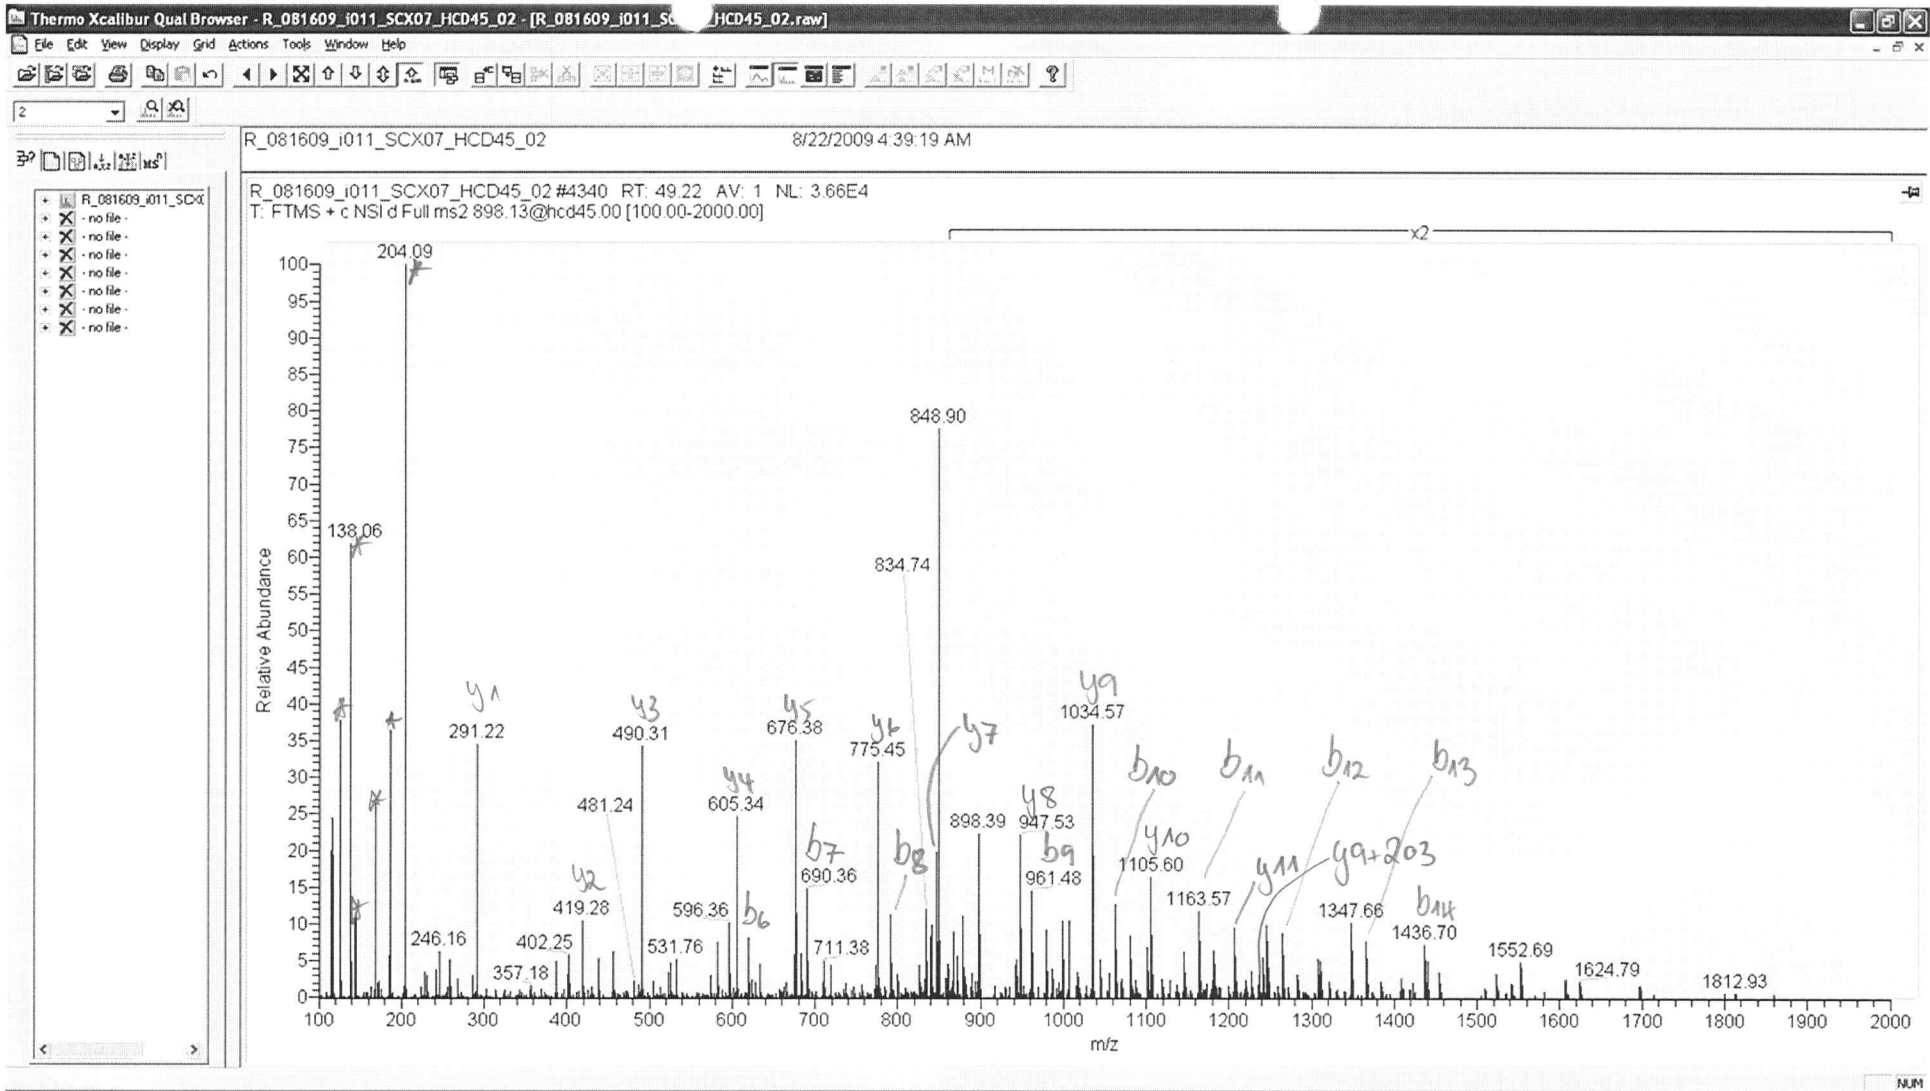

S15 or T16: OGlcNAc  
 N-term, U23 iTRAQ 4 plex

197: gTTTNATStTTTTASTAVADAQk<sup>y9</sup>  
 (1 O-GlcNAc site, 0 phospho-site, Mascot score = 90.5, Oscore = 1.23)

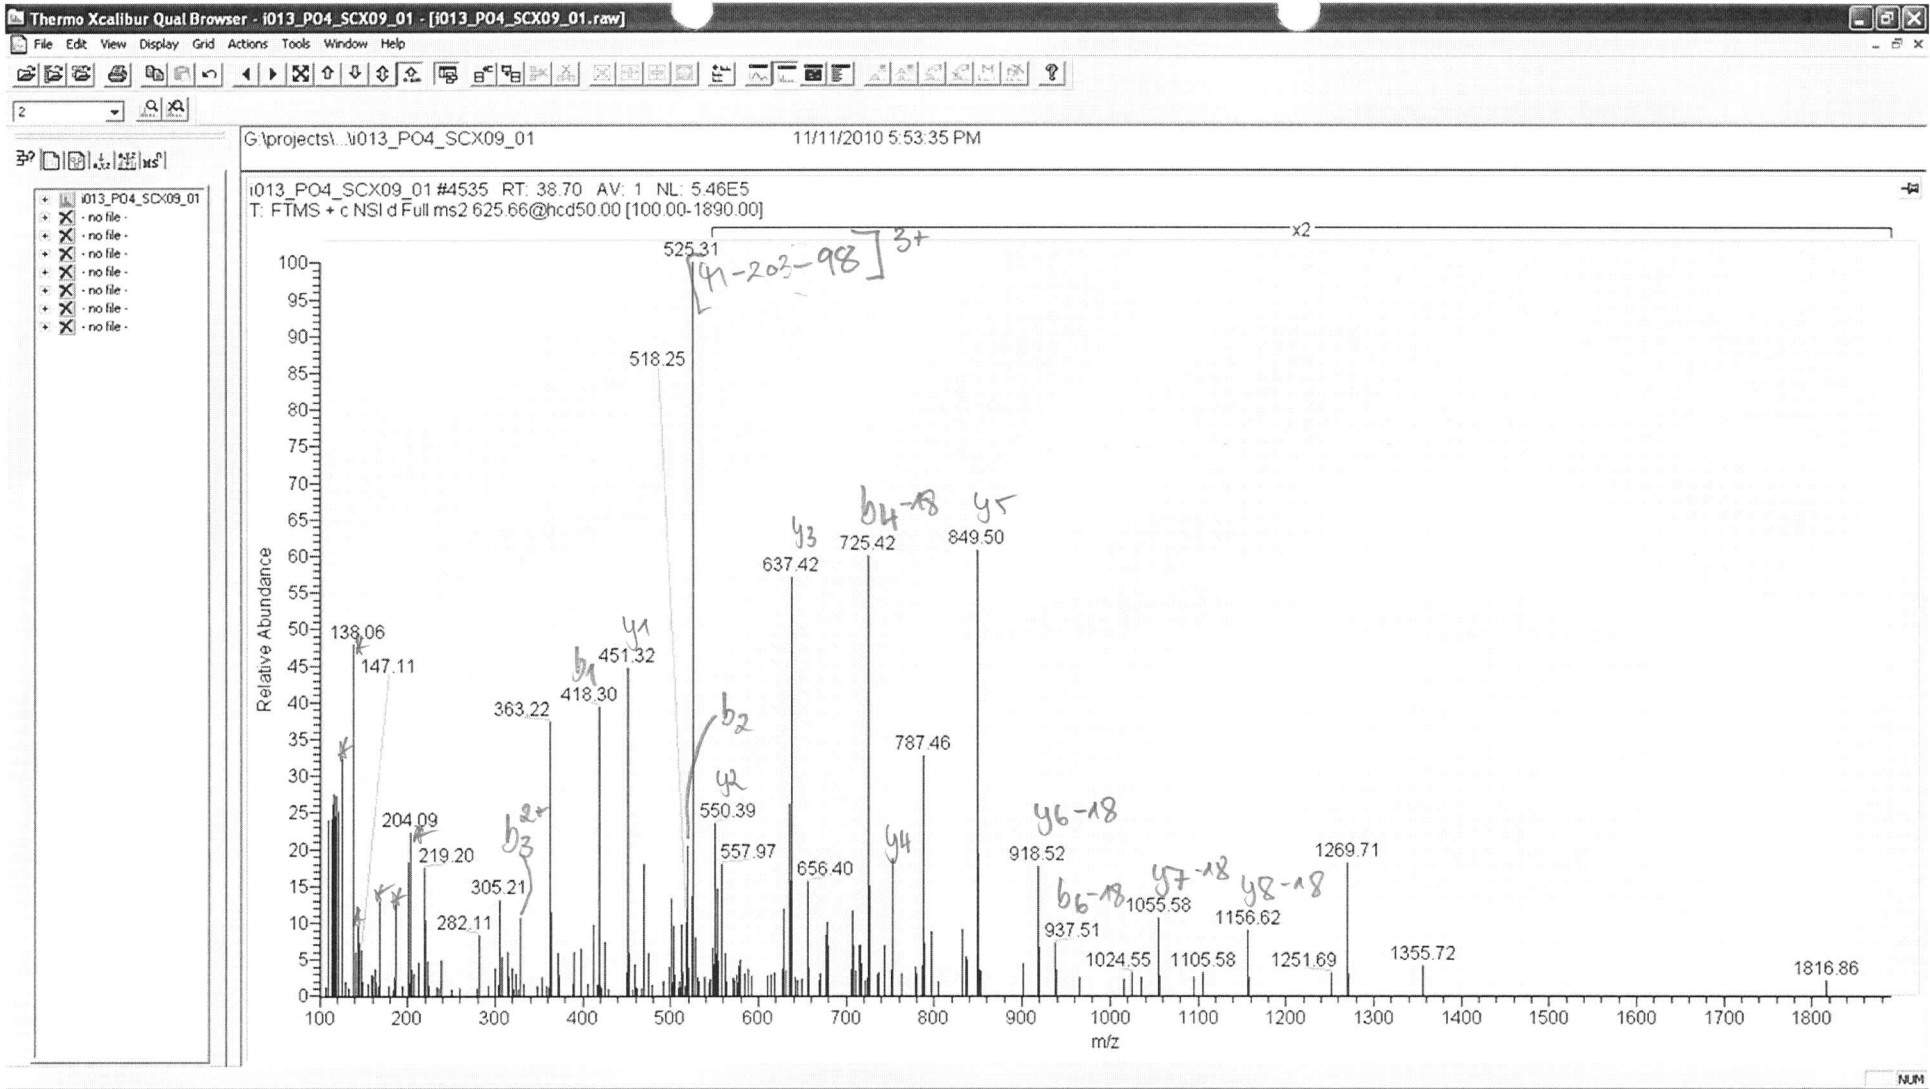

No site evidence for O-glcNAc  
 S4: phospho  
 N-term, K9: iTRAQ8 plex

199: iTHsPDsVk

(1 O-GlcNAc site, 1 phospho-site, Mascot score = 37.8, Oscore = 2.04)



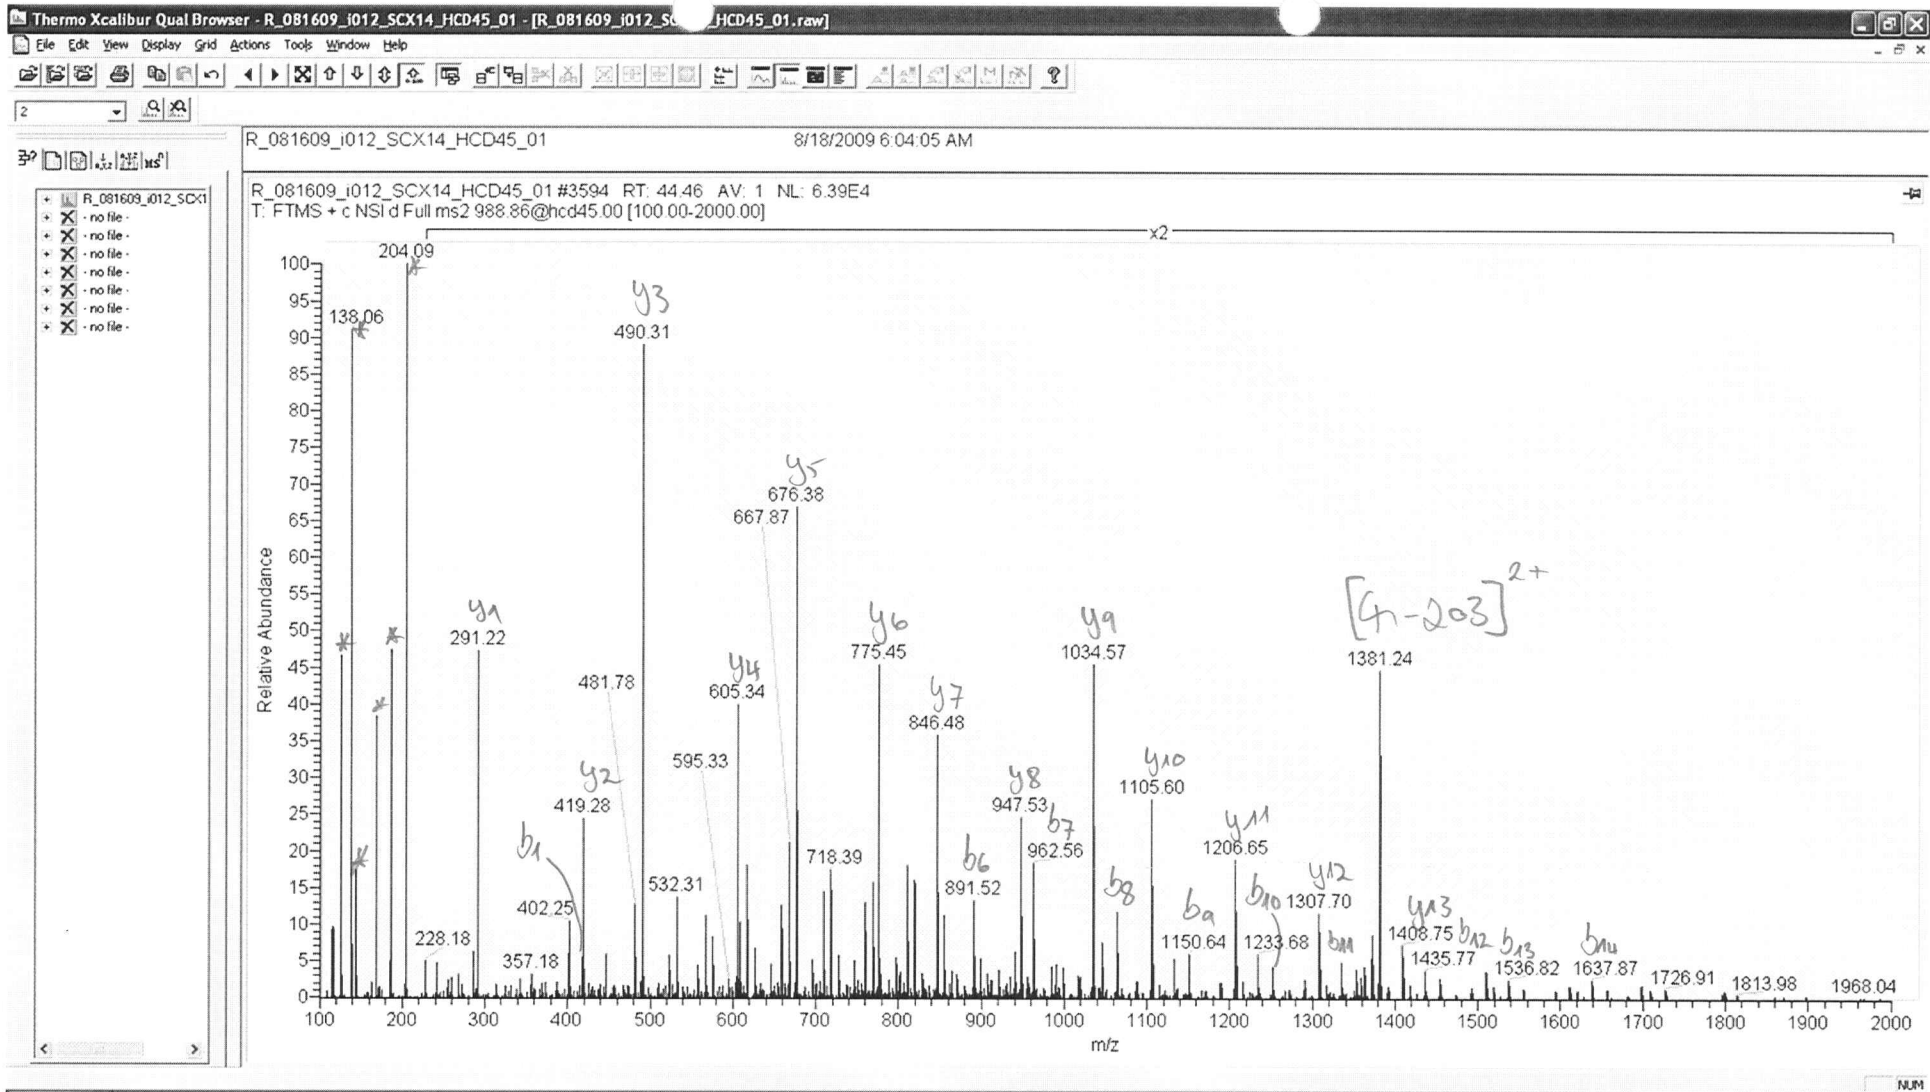

no site evidence

K-term, K1, K24: iTRAQ 4plex

201: kGTTT<sup>N</sup>ATSTtTTTASTAVADAQk

(1 O-GlcNAc site, 0 phospho-site, Mascot score = 120, Oscore = 0.86)

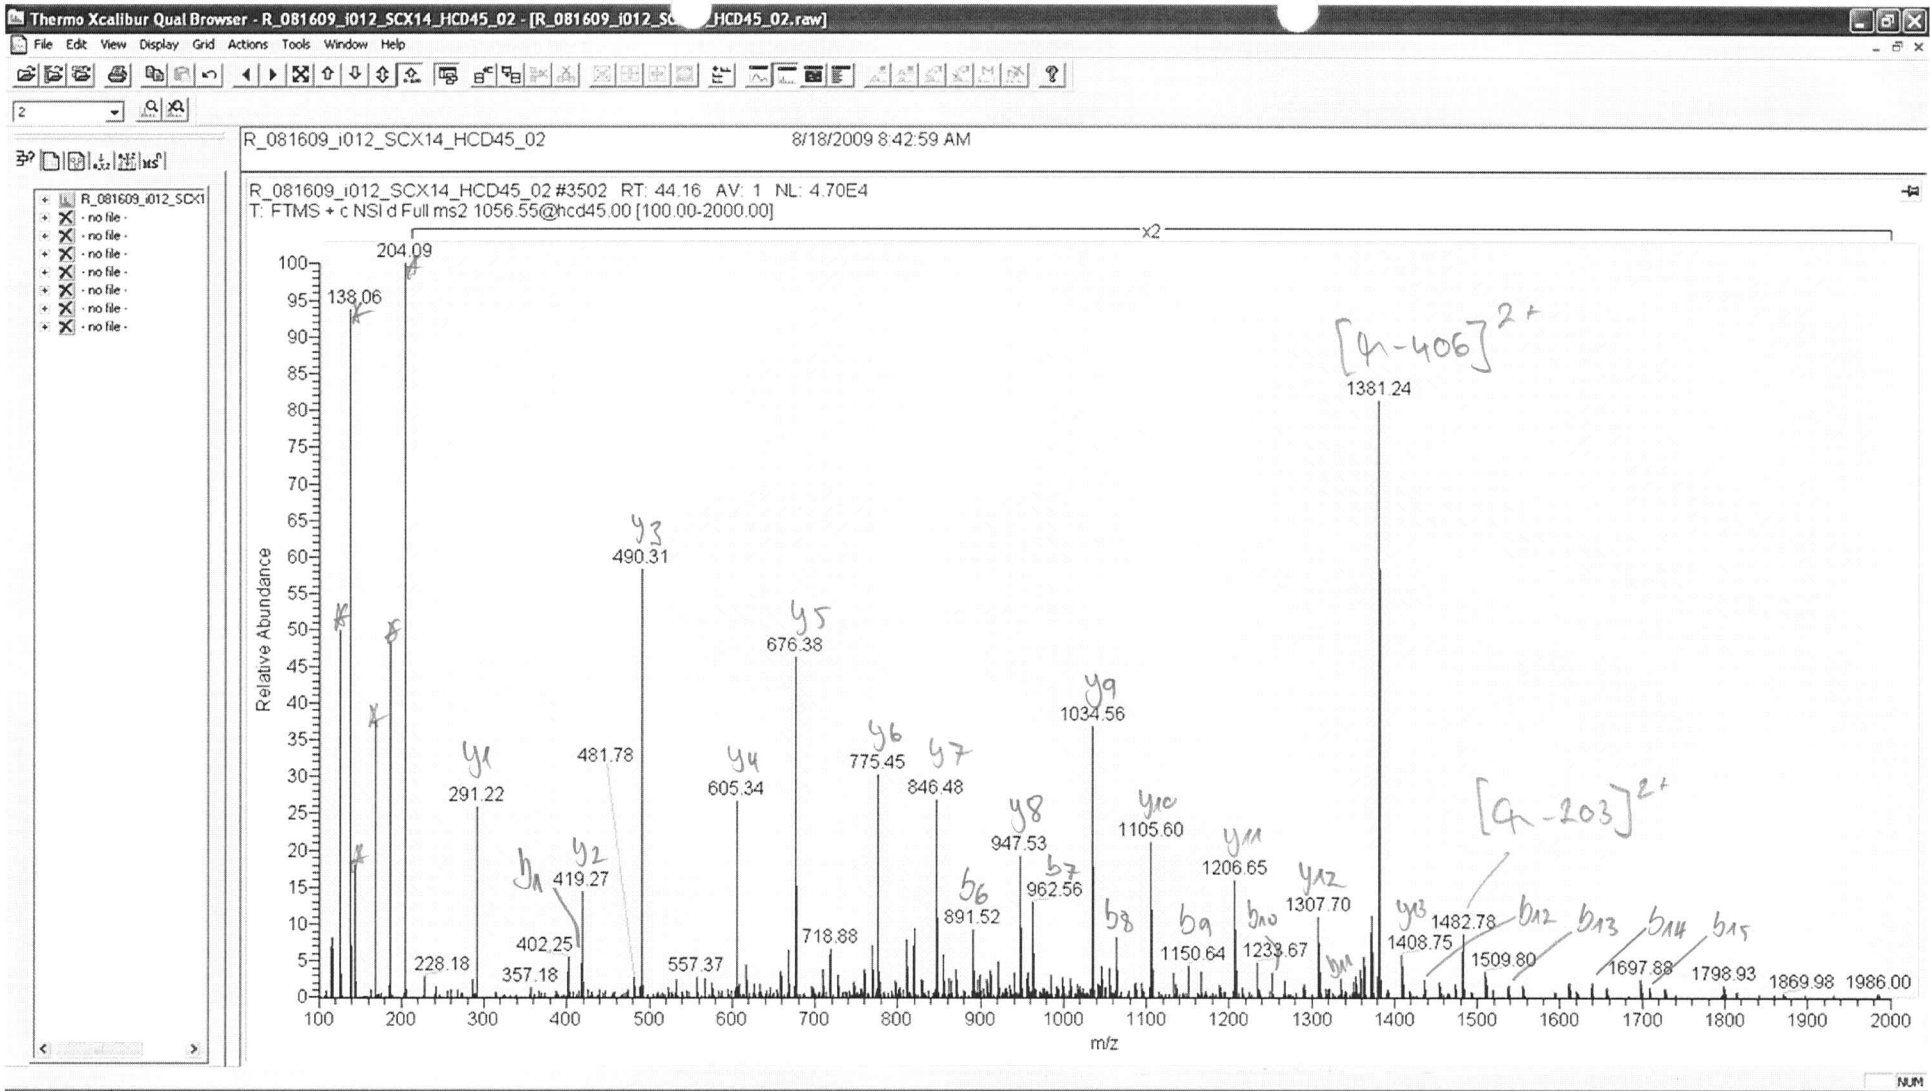

no site evidence found  
N-term, K1, K24: iTRAQ4plex

202: kGTTT<sup>N</sup>ATStTTTTAsTAVADAQk

(2 O-GlcNAc site, 0 phospho-site, Mascot score = 115, Oscore = 0.95)

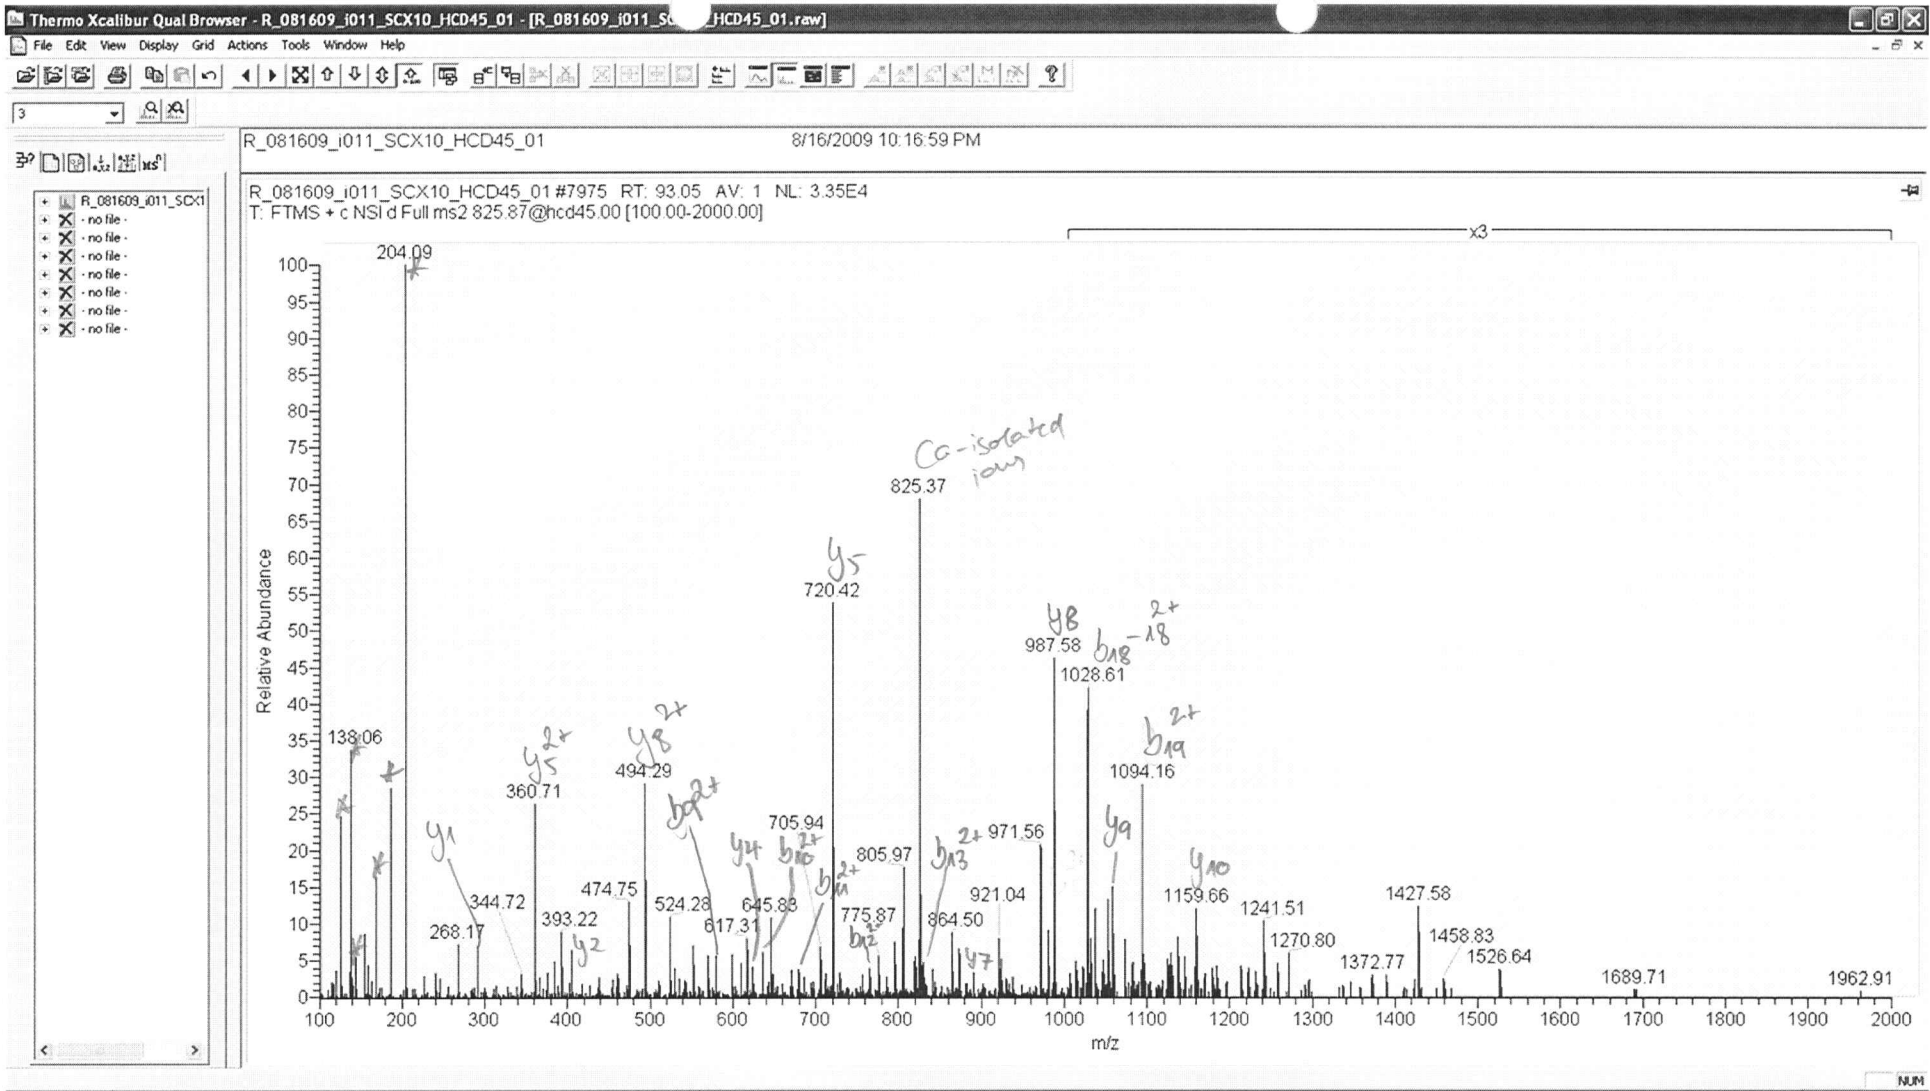

203: kPLVASTTALSATESLTLSTAGTATAPGLPAFnk

(1 O-GlcNAc site, 0 phospho-site, Mascot score = 49.8, Oscore = 1.40)

No site evidence found  
 Re-term., K1, K36: iTRAQ4plex



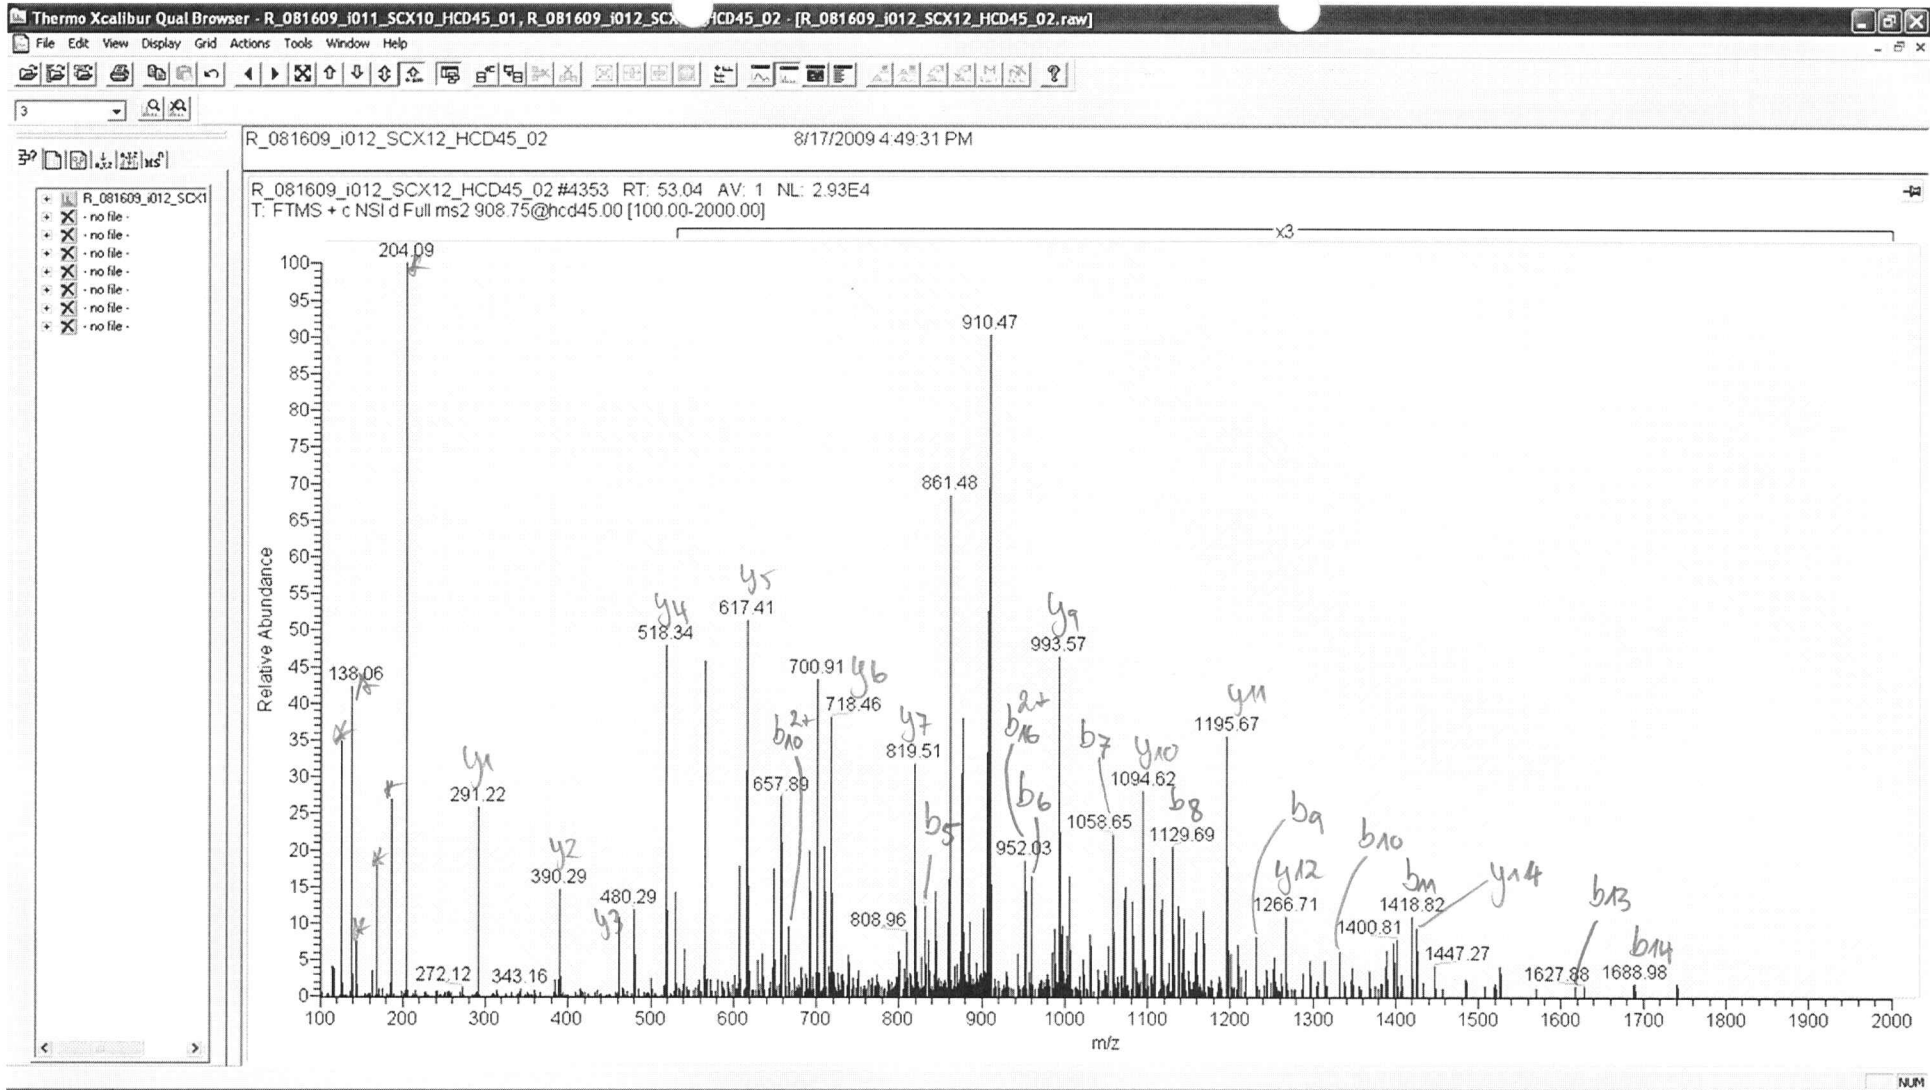

no nit evidence

N-term, U1, K31: iTRAQ 4plex

204: kTEALQVATTSPANTTGTATTSStVGAVk

(1 O-GlcNAc site, 0 phospho-site, Mascot score = 126, Oscore = 1.00)



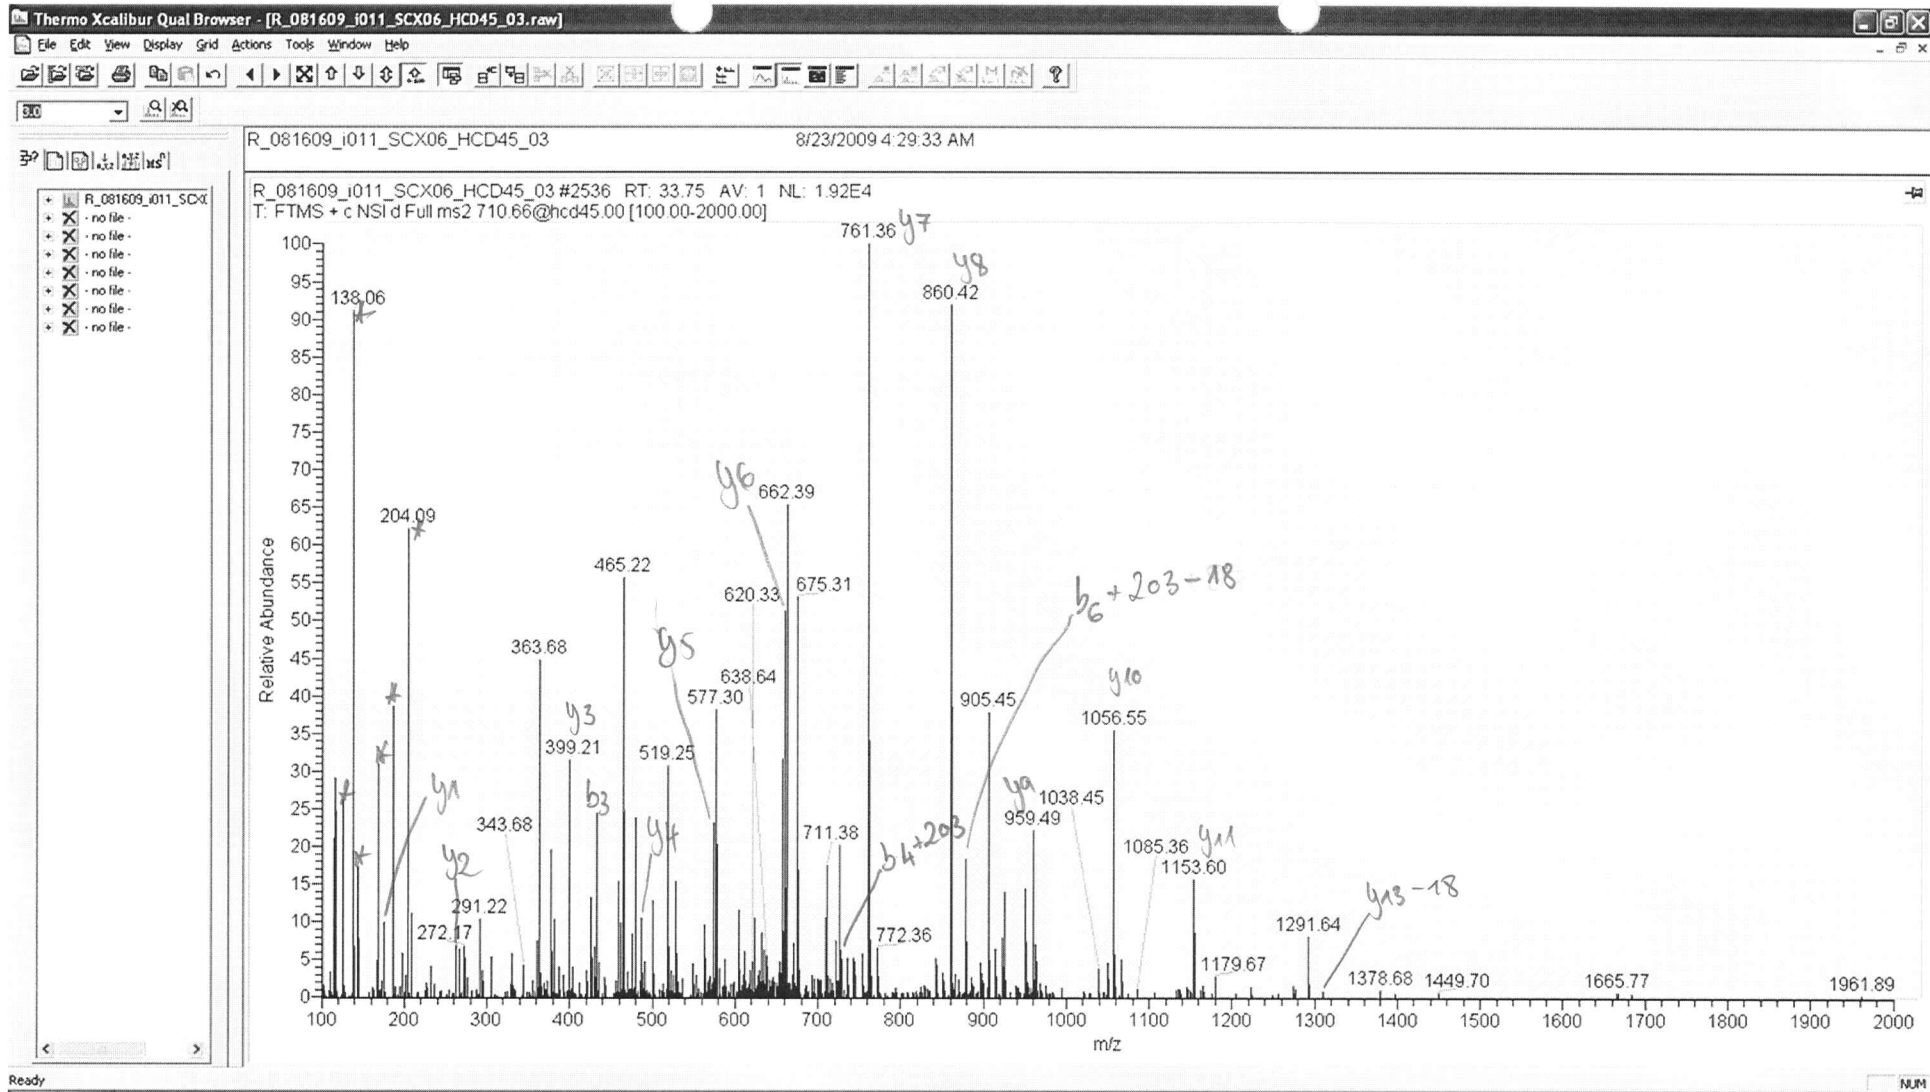

208: sEASSsPPVVTSSSHSR

(1 O-GlcNAc site, 1 phospho-site, Mascot score = 58.3, Oscore = 1.92)

S4: O-GlcNAc  
S5 or S6: phospho  
N-term.: iTRAQ4plex

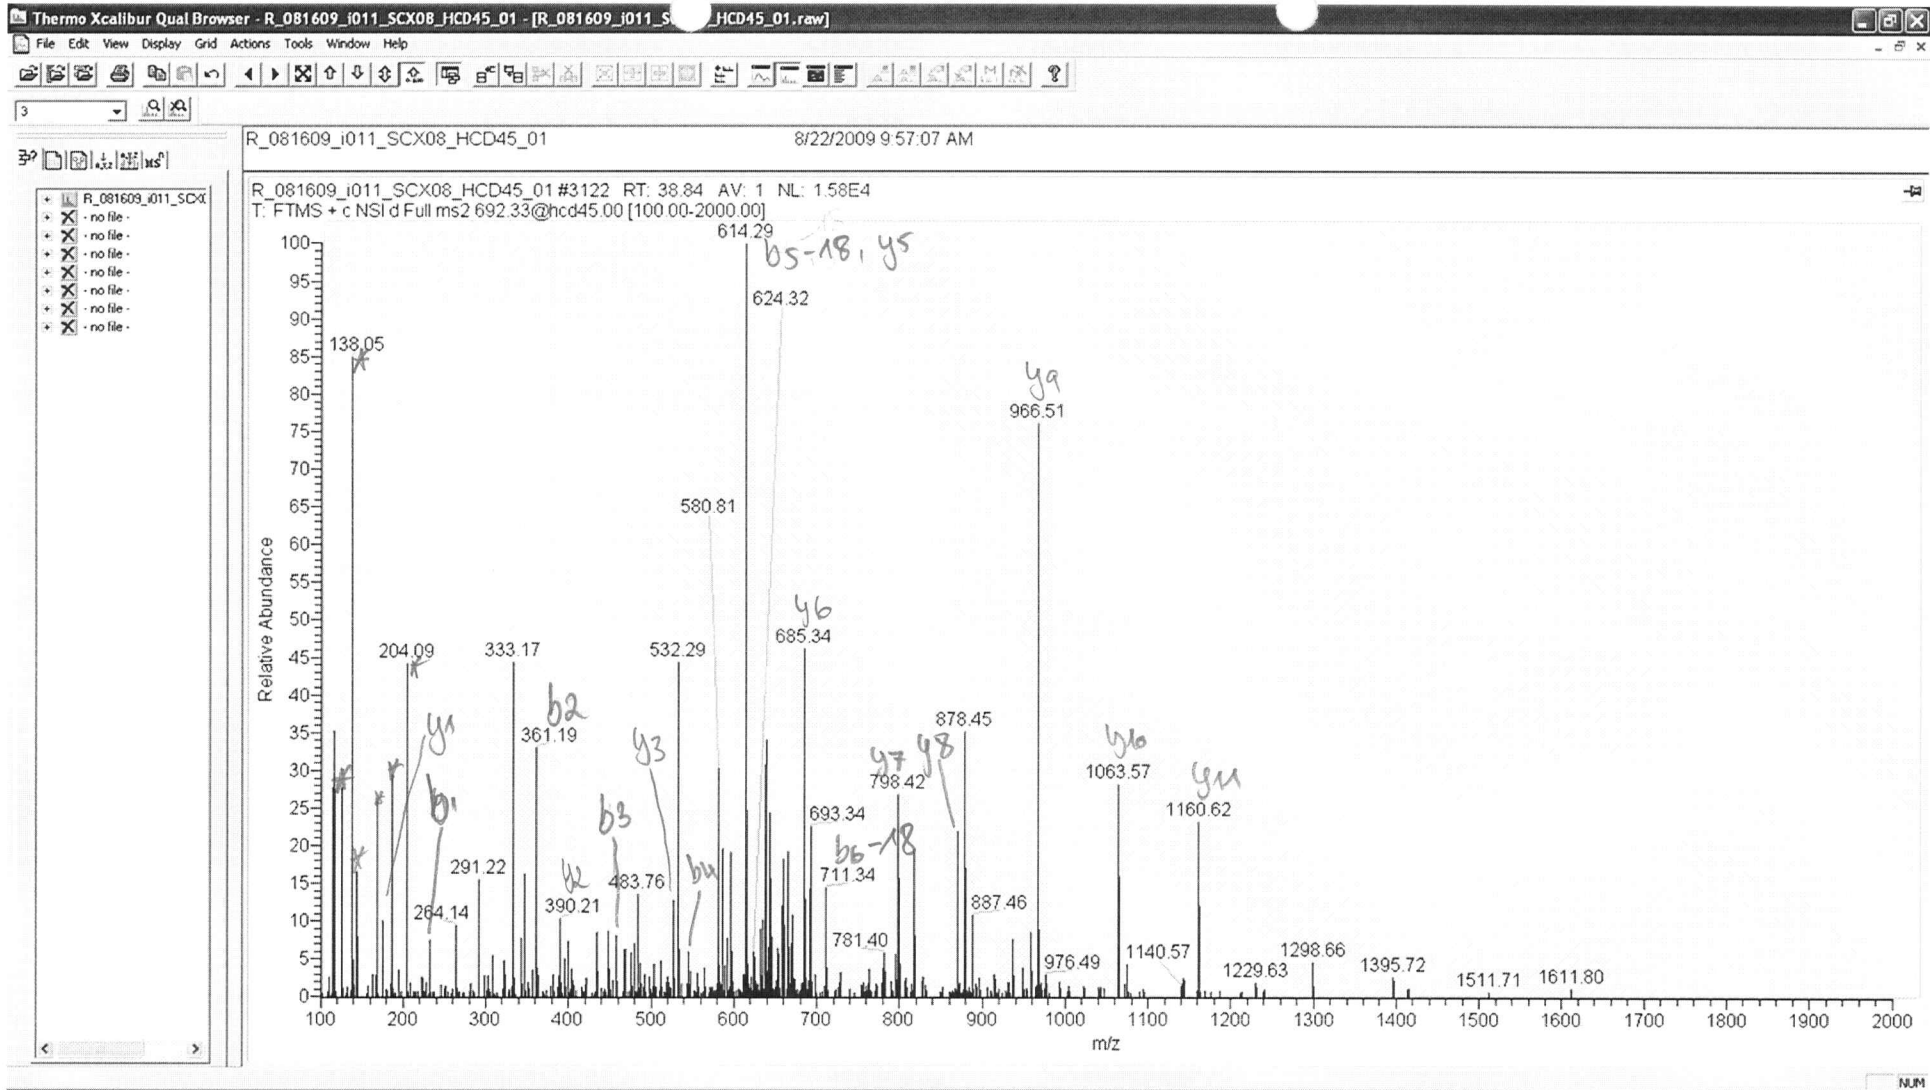

SS: phospho  
 O-GlcNAc site unknown

X-tan iTRAQ4plex

209: sEPS<sub>s</sub>PPPAlASHsQR

(1 O-GlcNAc site, 1 phospho-site, Mascot score = 54.9, Oscore = 1.99)

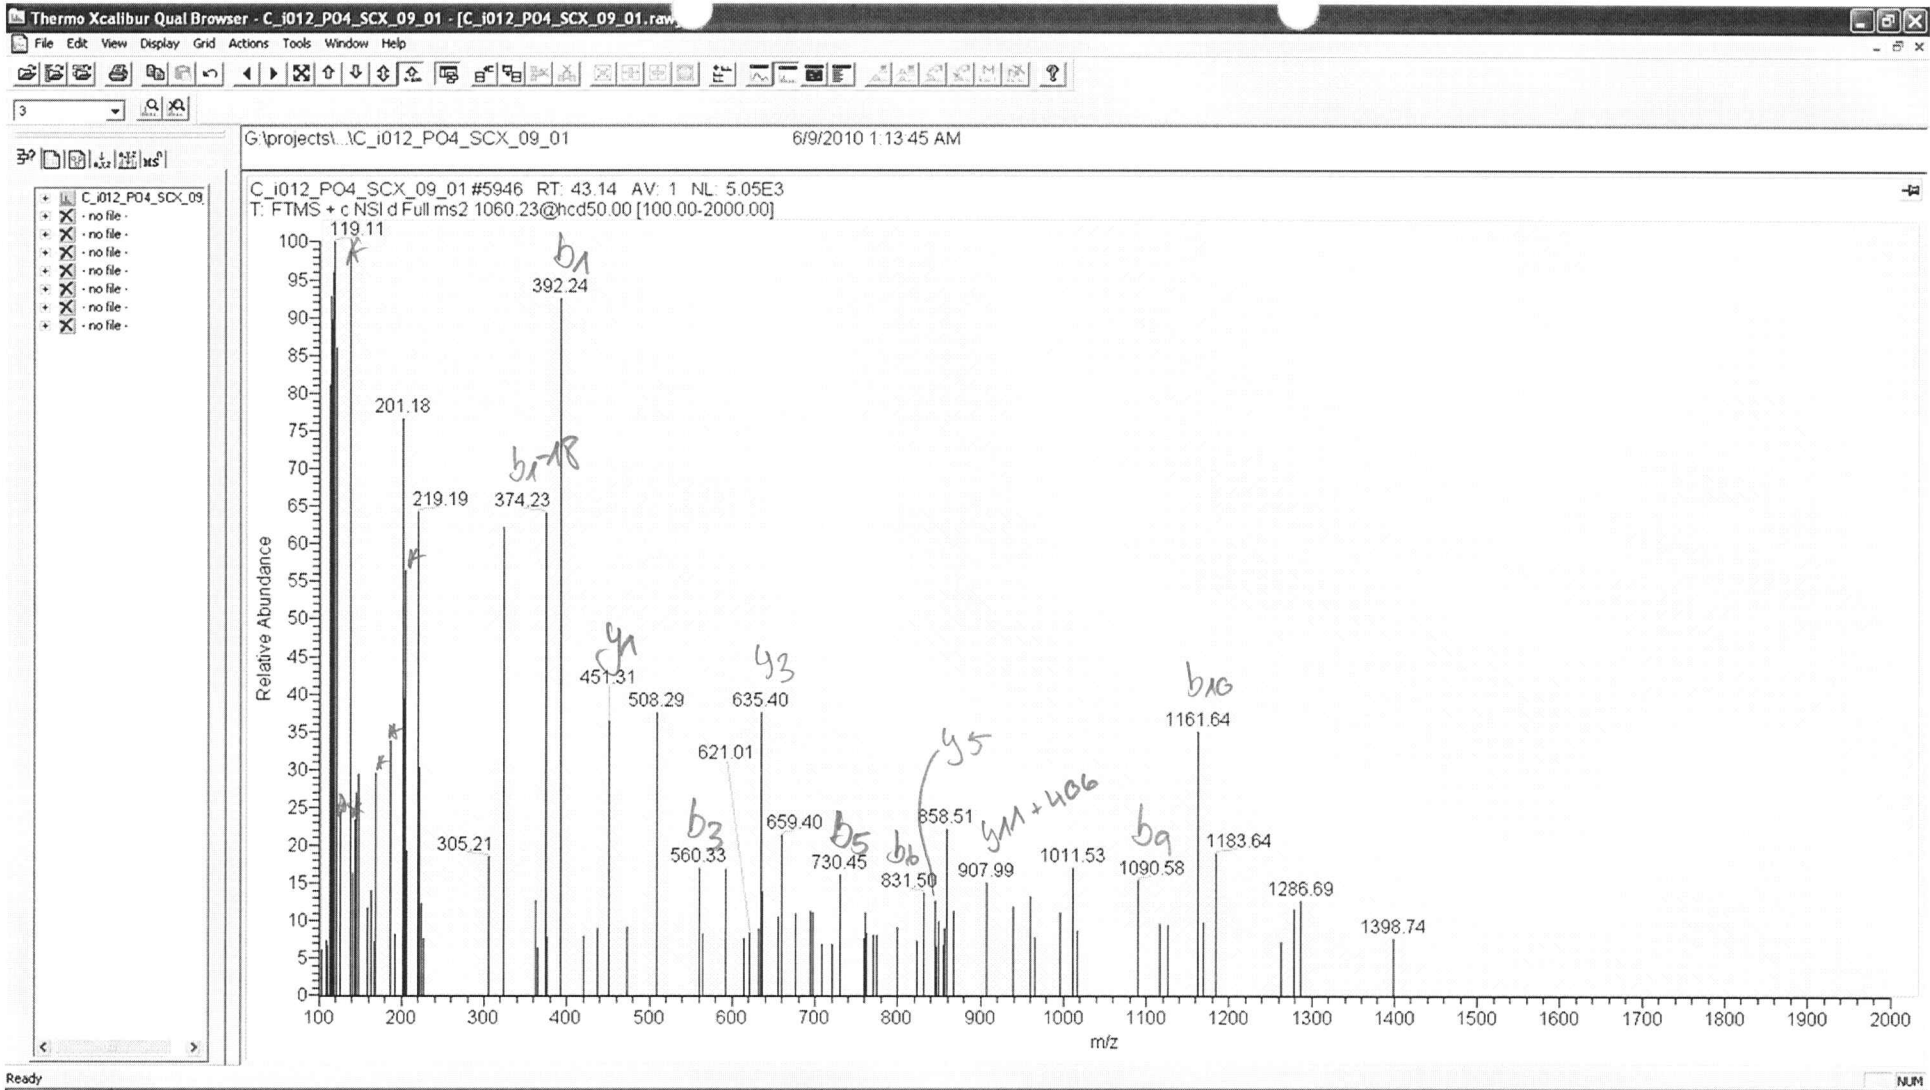

2 O-glcNAc sites at 515, 16 and/or 20

N-term., K21: iTRAQ 8plex

210: sPAVATStAAPPpssPLPSk  
 (3 O-GlcNAc site, 0 phospho-site, Mascot score = 17.5, Oscore = 1.81)

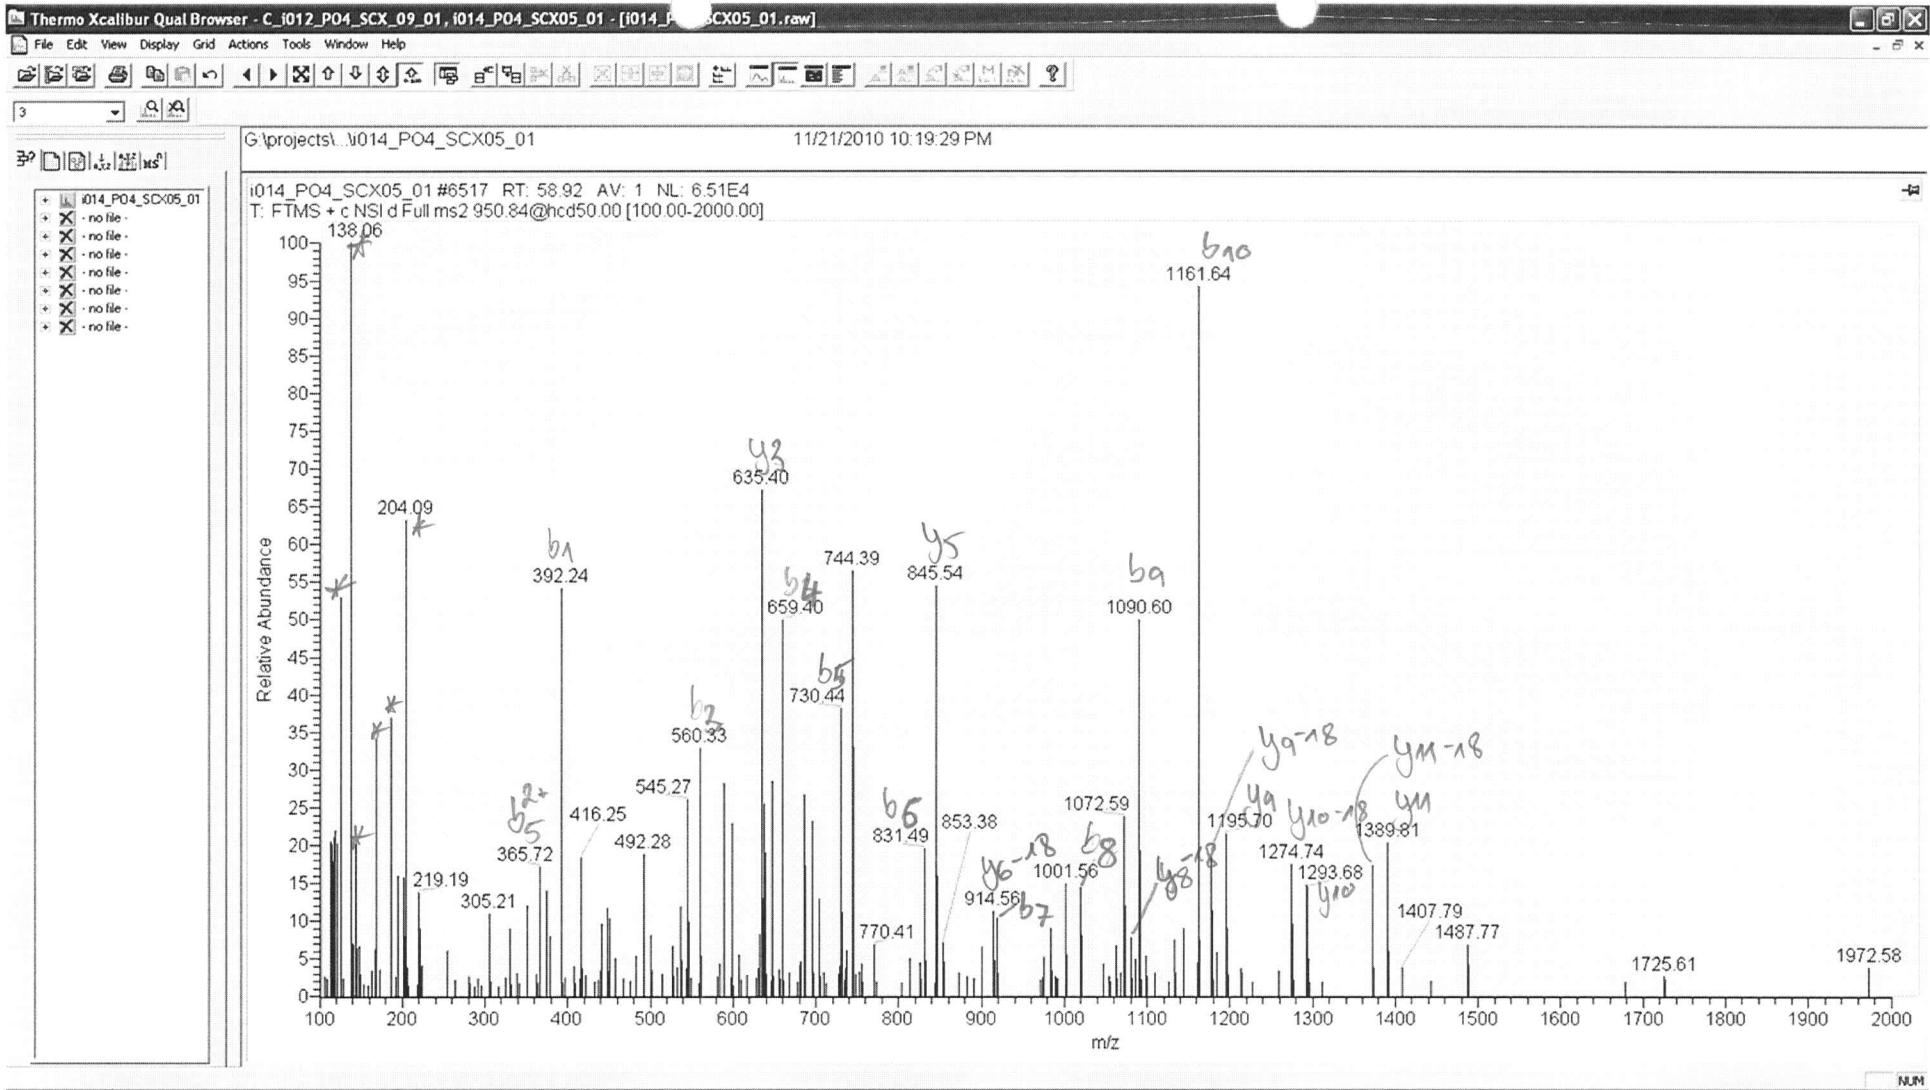

S16 : phospho  
 O-glcNAc site : unknown  
 N-term, K21 : iTRAQ 8plex

211: sPAVATStAAPPPSSPLPSk  
 (1 O-GlcNAc site, 1 phospho-site, Mascot score = 56.9, Oscore = 1.74)

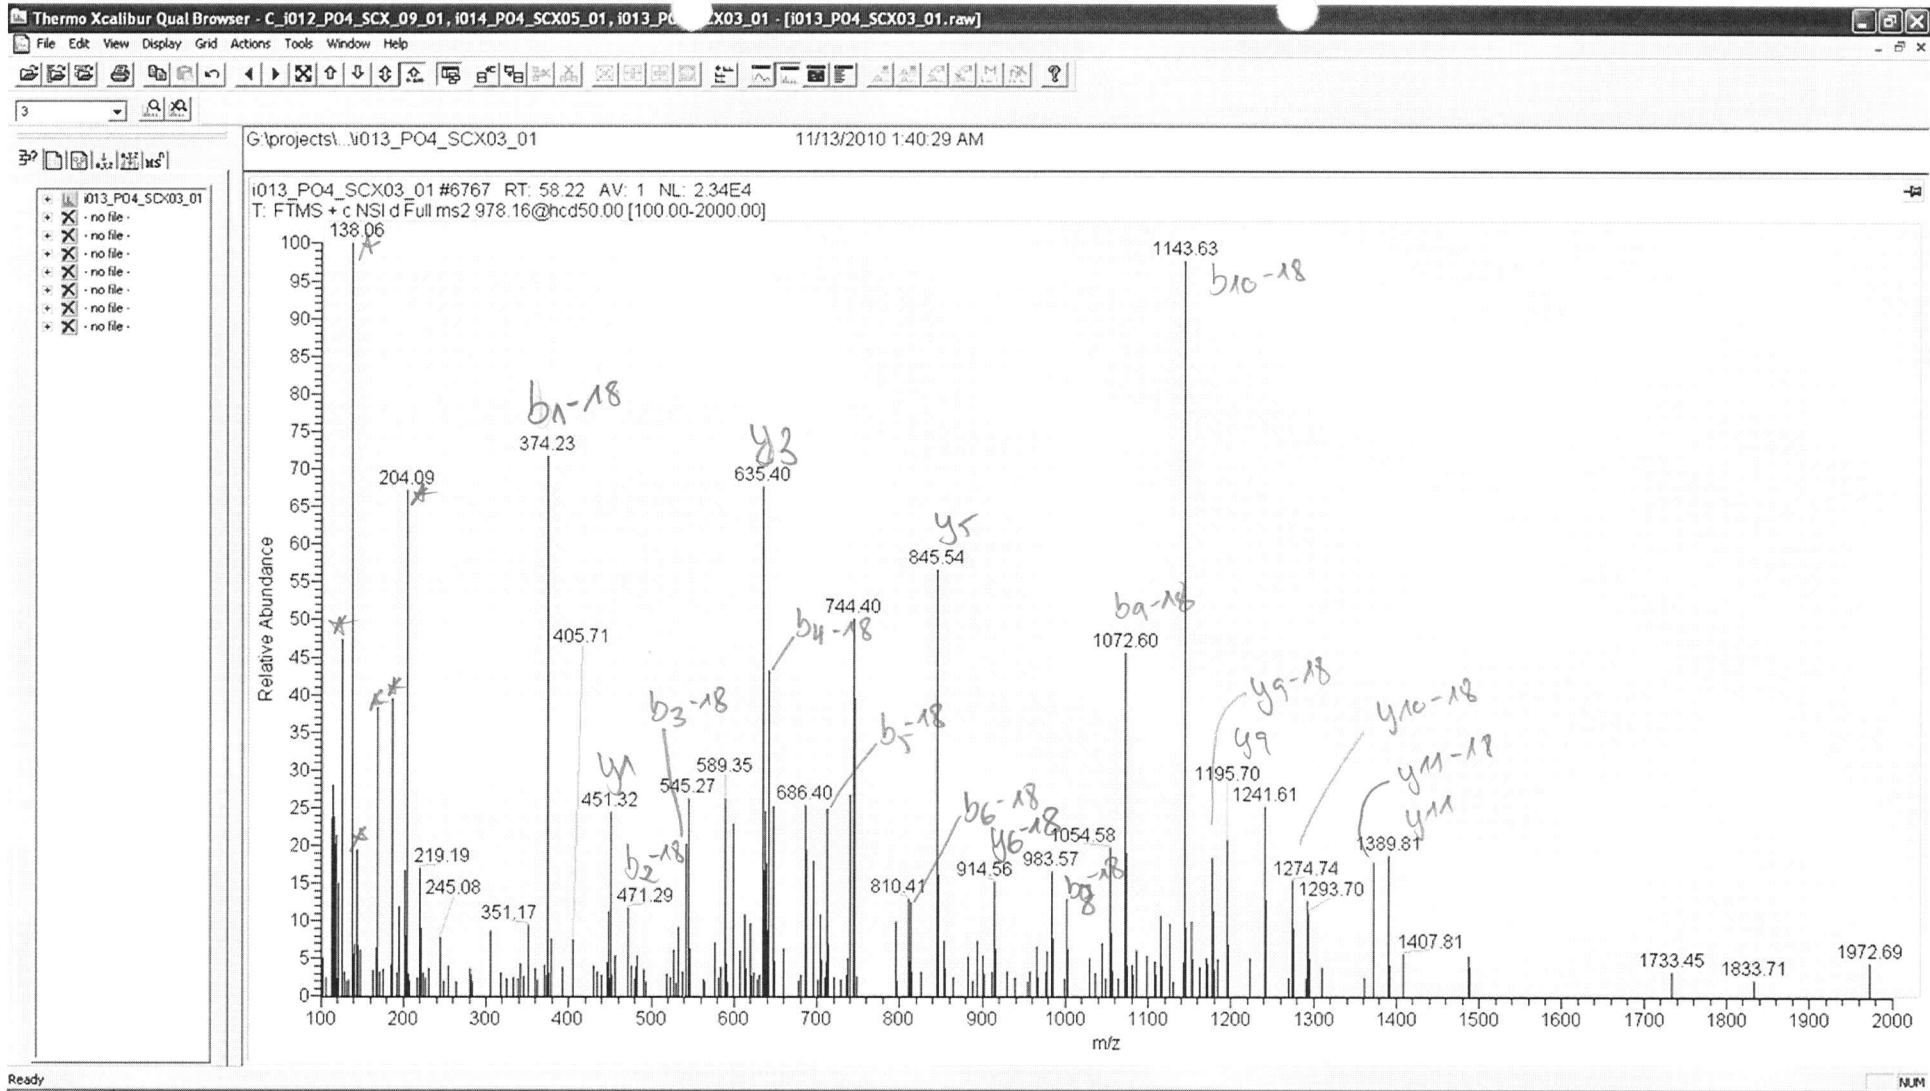

S1: phospho  
 S16: phospho  
 O-glcNAc site unknown  
 N-term., K21 iTRAQ 8plex

212: sPAVAtSTAAPPPSSPLPsk  
 (1 O-GlcNAc site, 2 phospho-site, Mascot score = 58, Oscore = 1.72)

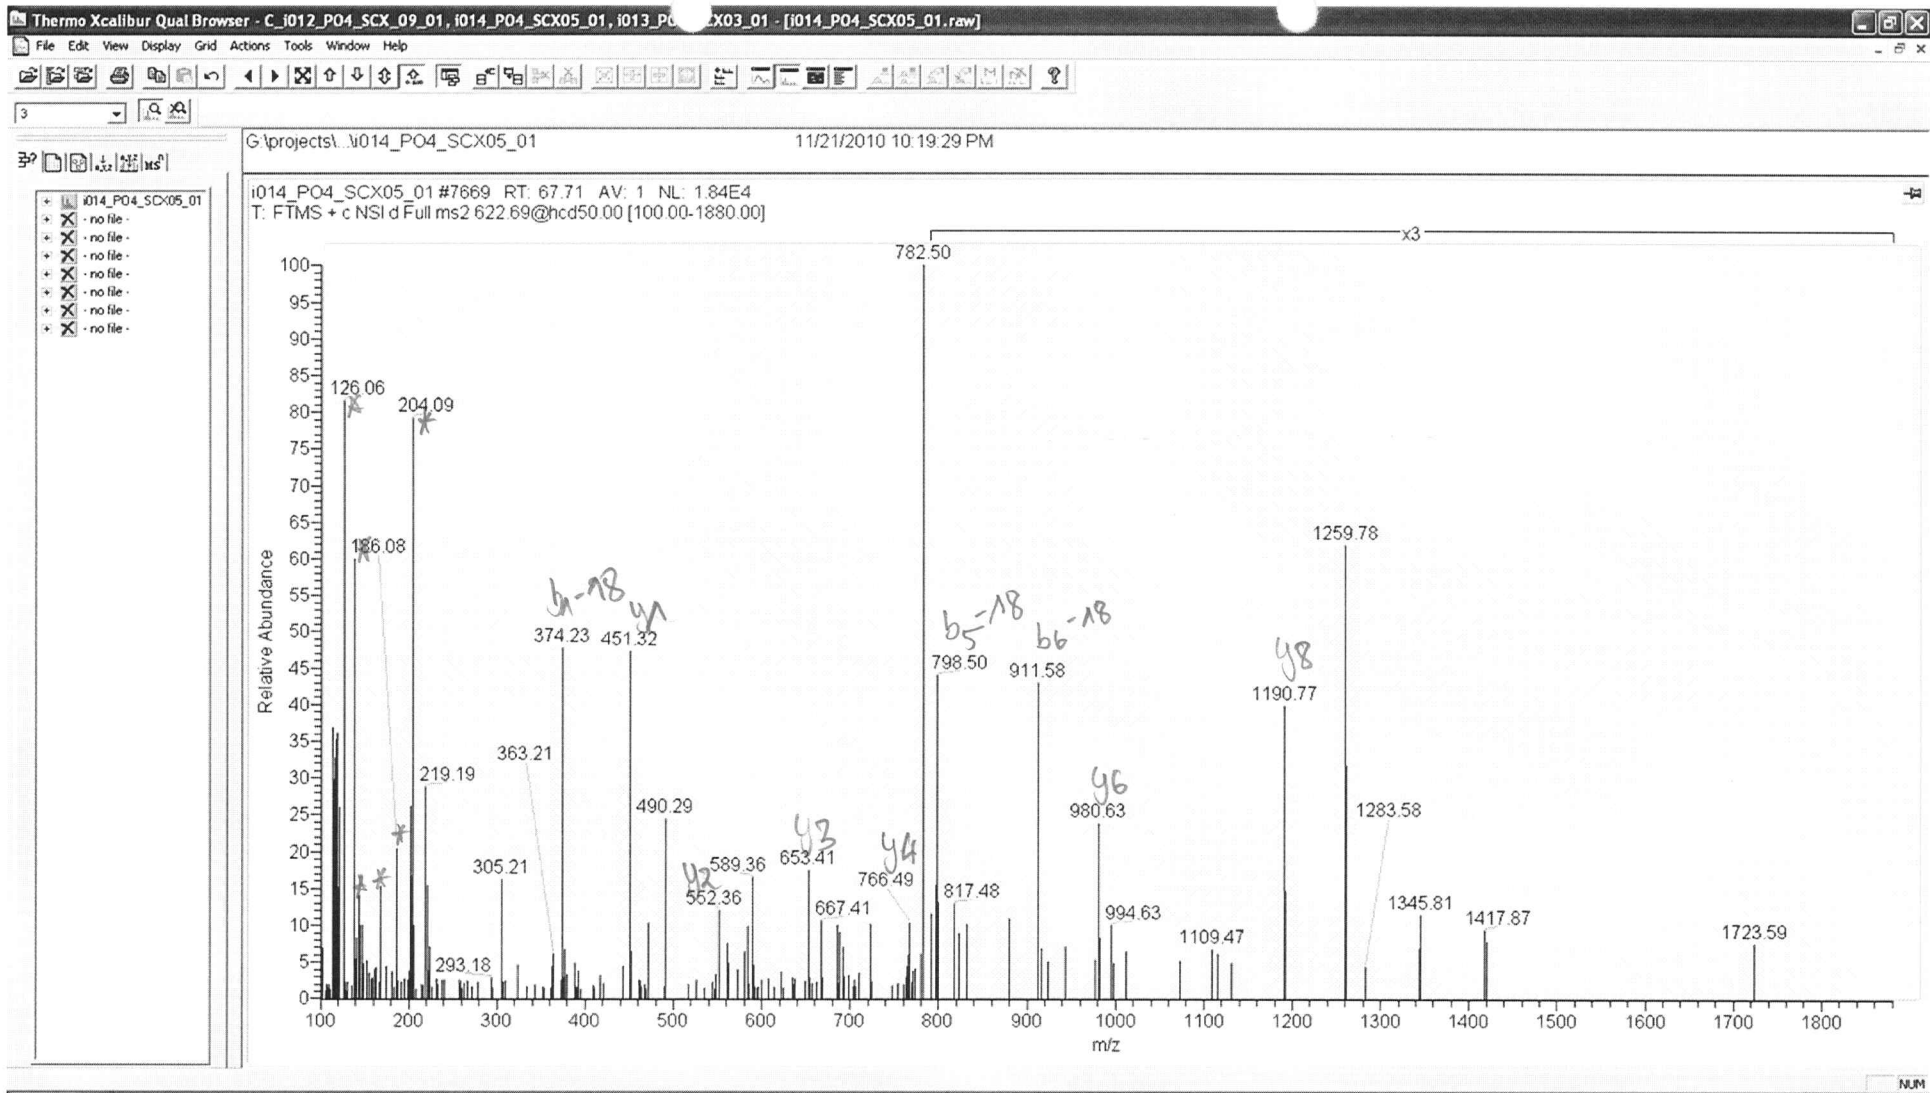

S1: phospho  
 O-glcNAc site unknown  
 N-term, y9 iTRAQ 8plex

213: sPITIIITtk

(1 O-GlcNAc site, 1 phospho-site, Mascot score = 24.6, Oscore = 1.29)



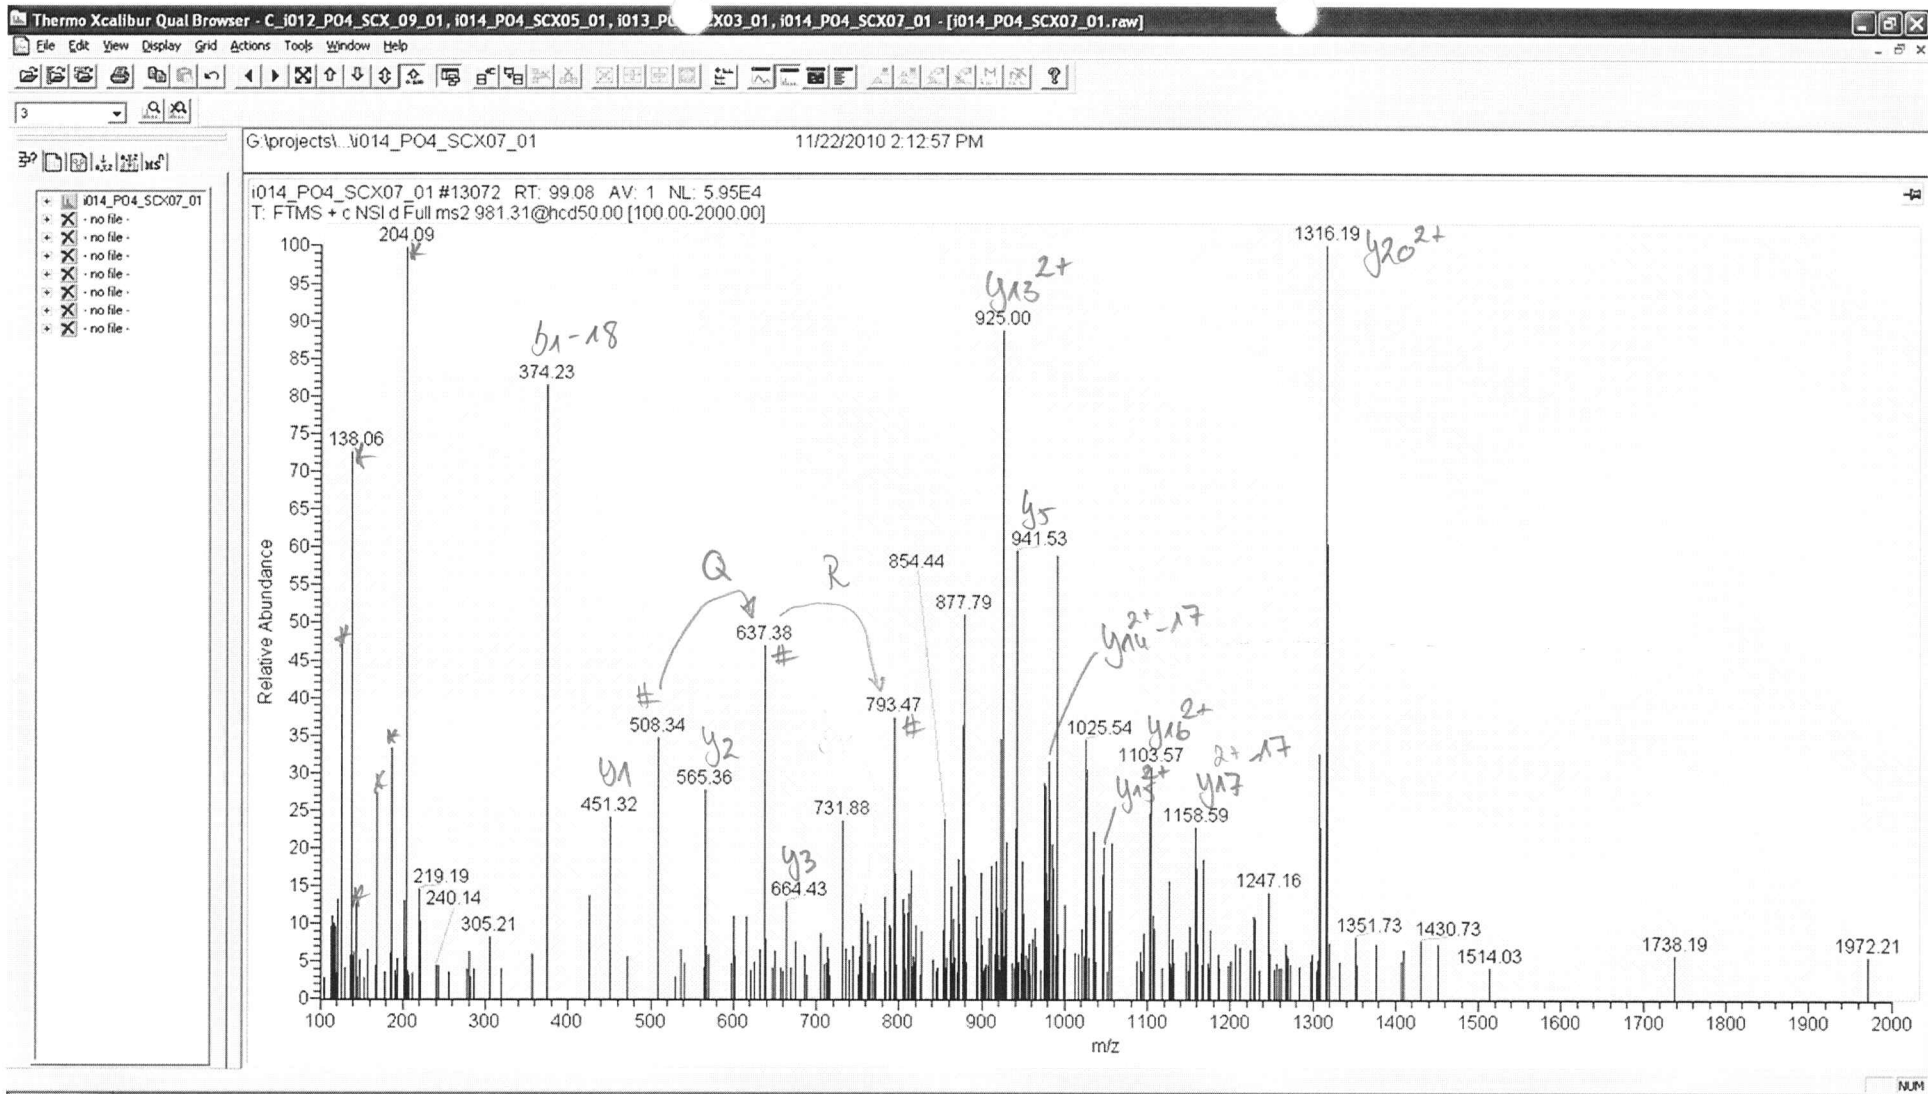

SA: phospho  
 O-glcNAc: unknown

214: sP**bl**VPHTPVtISLGTAPSLQ**yl3**NNQPVEFNHAIN**yl20**VVNK  
 (1 O-GlcNAc site, 1 phospho-site, Mascot score = 35.3, Oscore = 2.16)

# chimeric spectrum;  
 2nd ion series

6-ten, 1137: iTRAQ 8plex

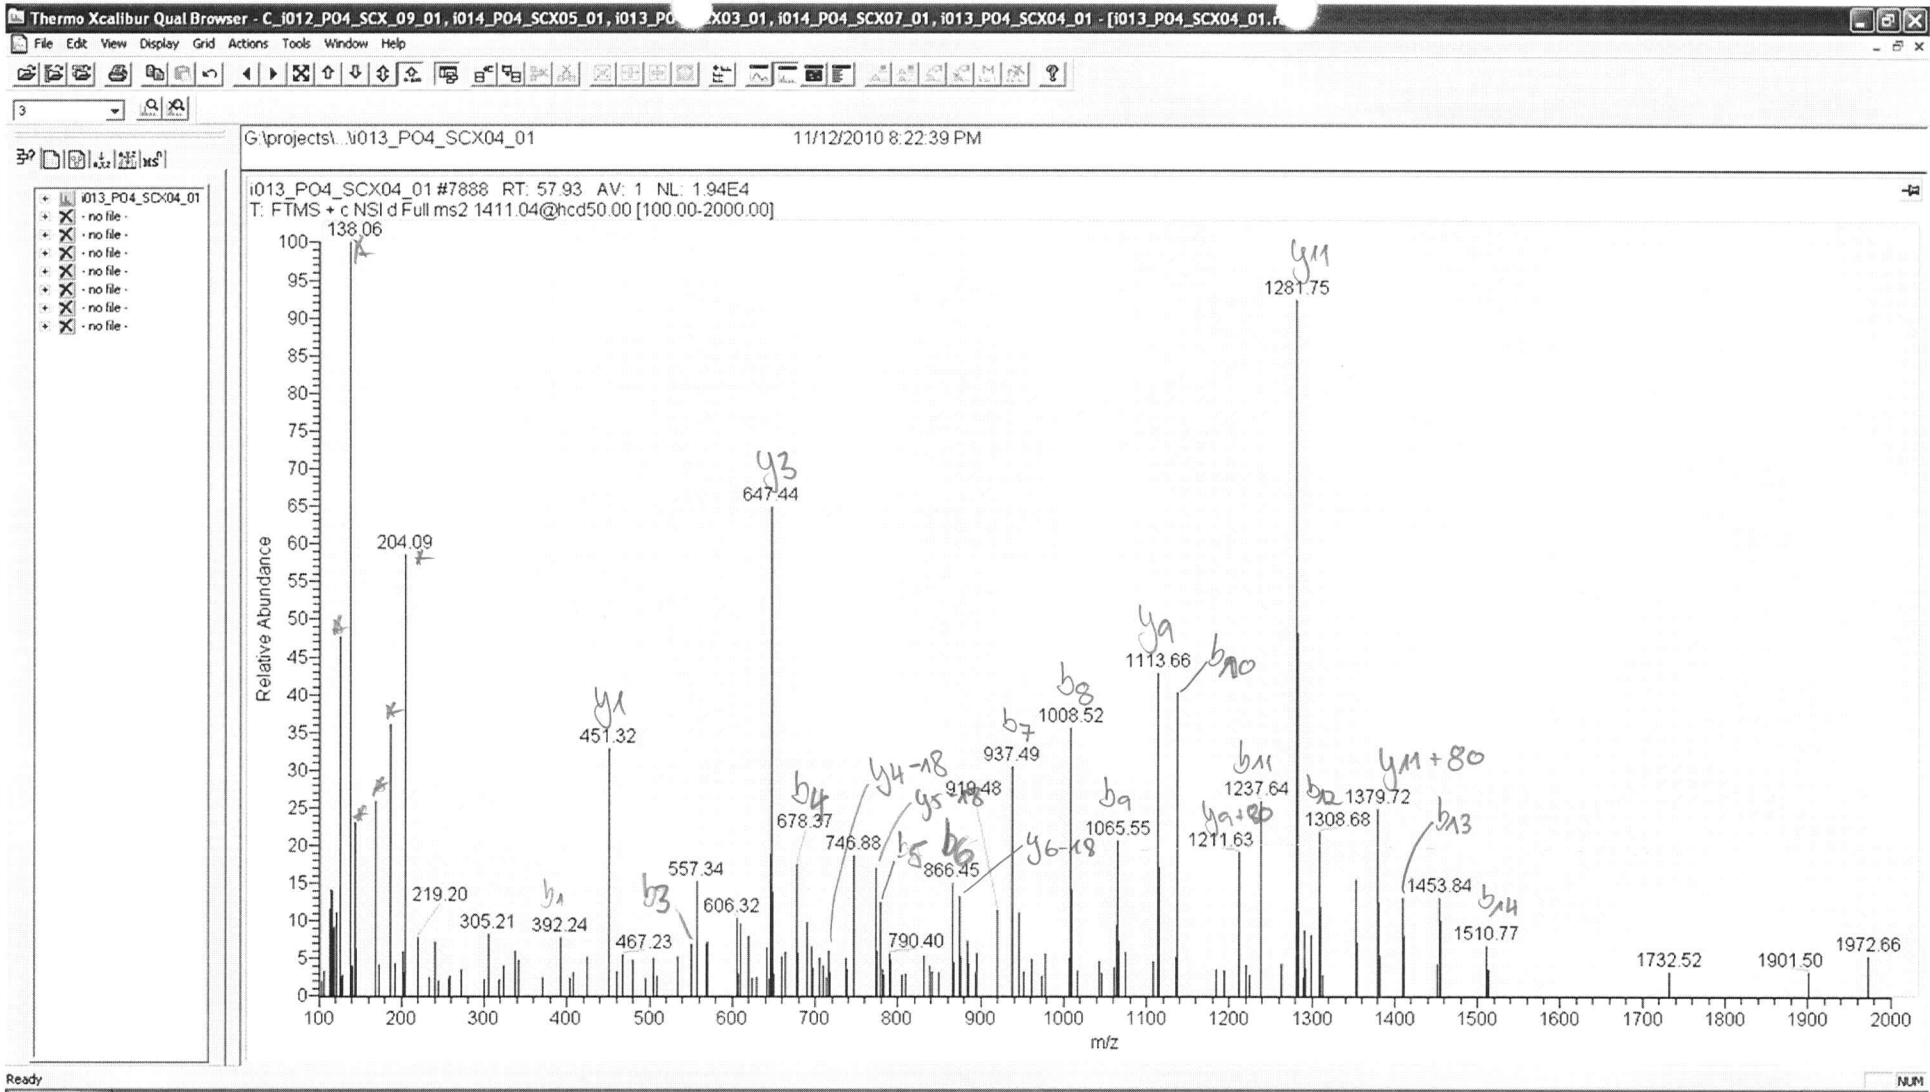

S32 : phospho  
O-glcNAc unknown  
N-term., K35: iTRAG & plex

215: sSAQTSAAAGATATTsTSSTVtVTAPAPAATGsPVK  
(2 O-GlcNAc site, 1 phospho-site, Mascot score = 133, Oscore = 1.43)



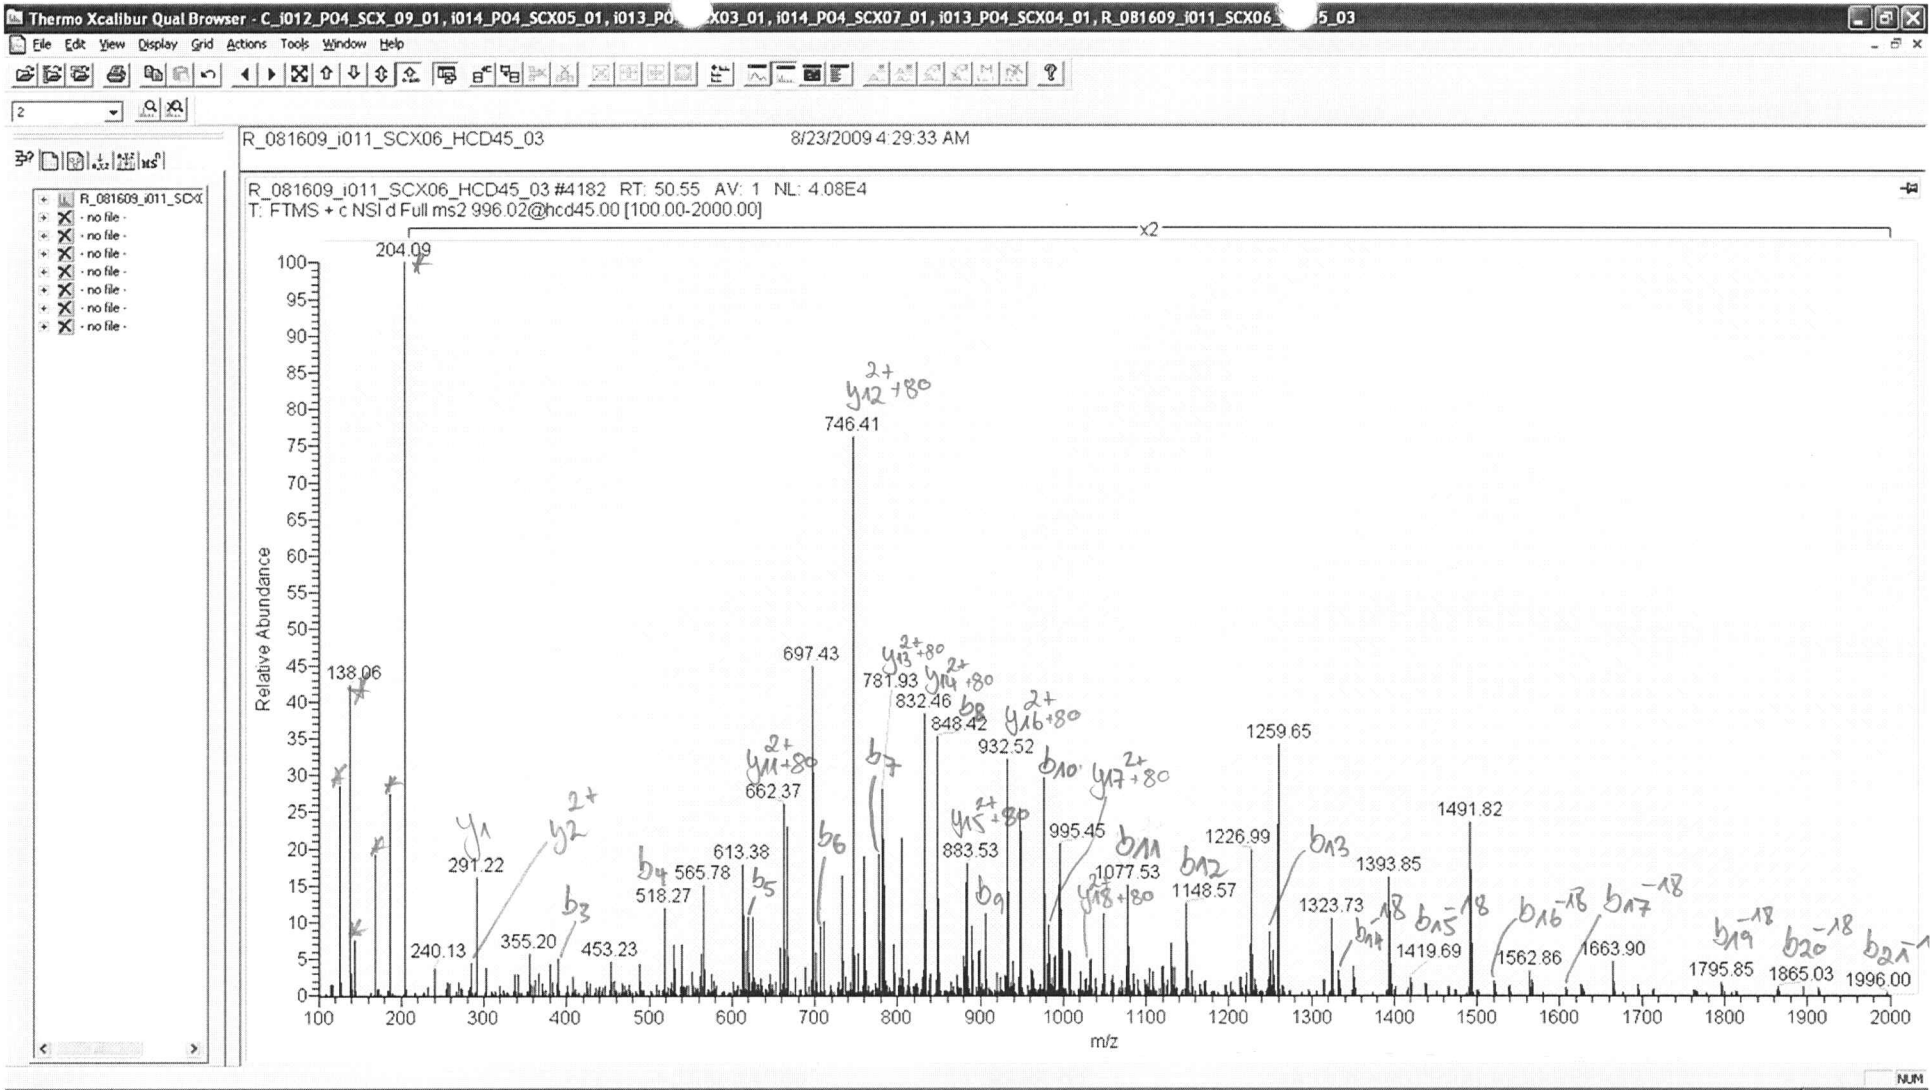

S32: phospho  
 O-glcNAc site unknown  
 N-term., K35, K36: iTRAQ4plex

216: sSAQTSAAAGATATtSTSSTVTVTAPAPAATGsPVkk

(1 O-GlcNAc site, 1 phospho-site, Mascot score = 152, Oscore = 1.05)

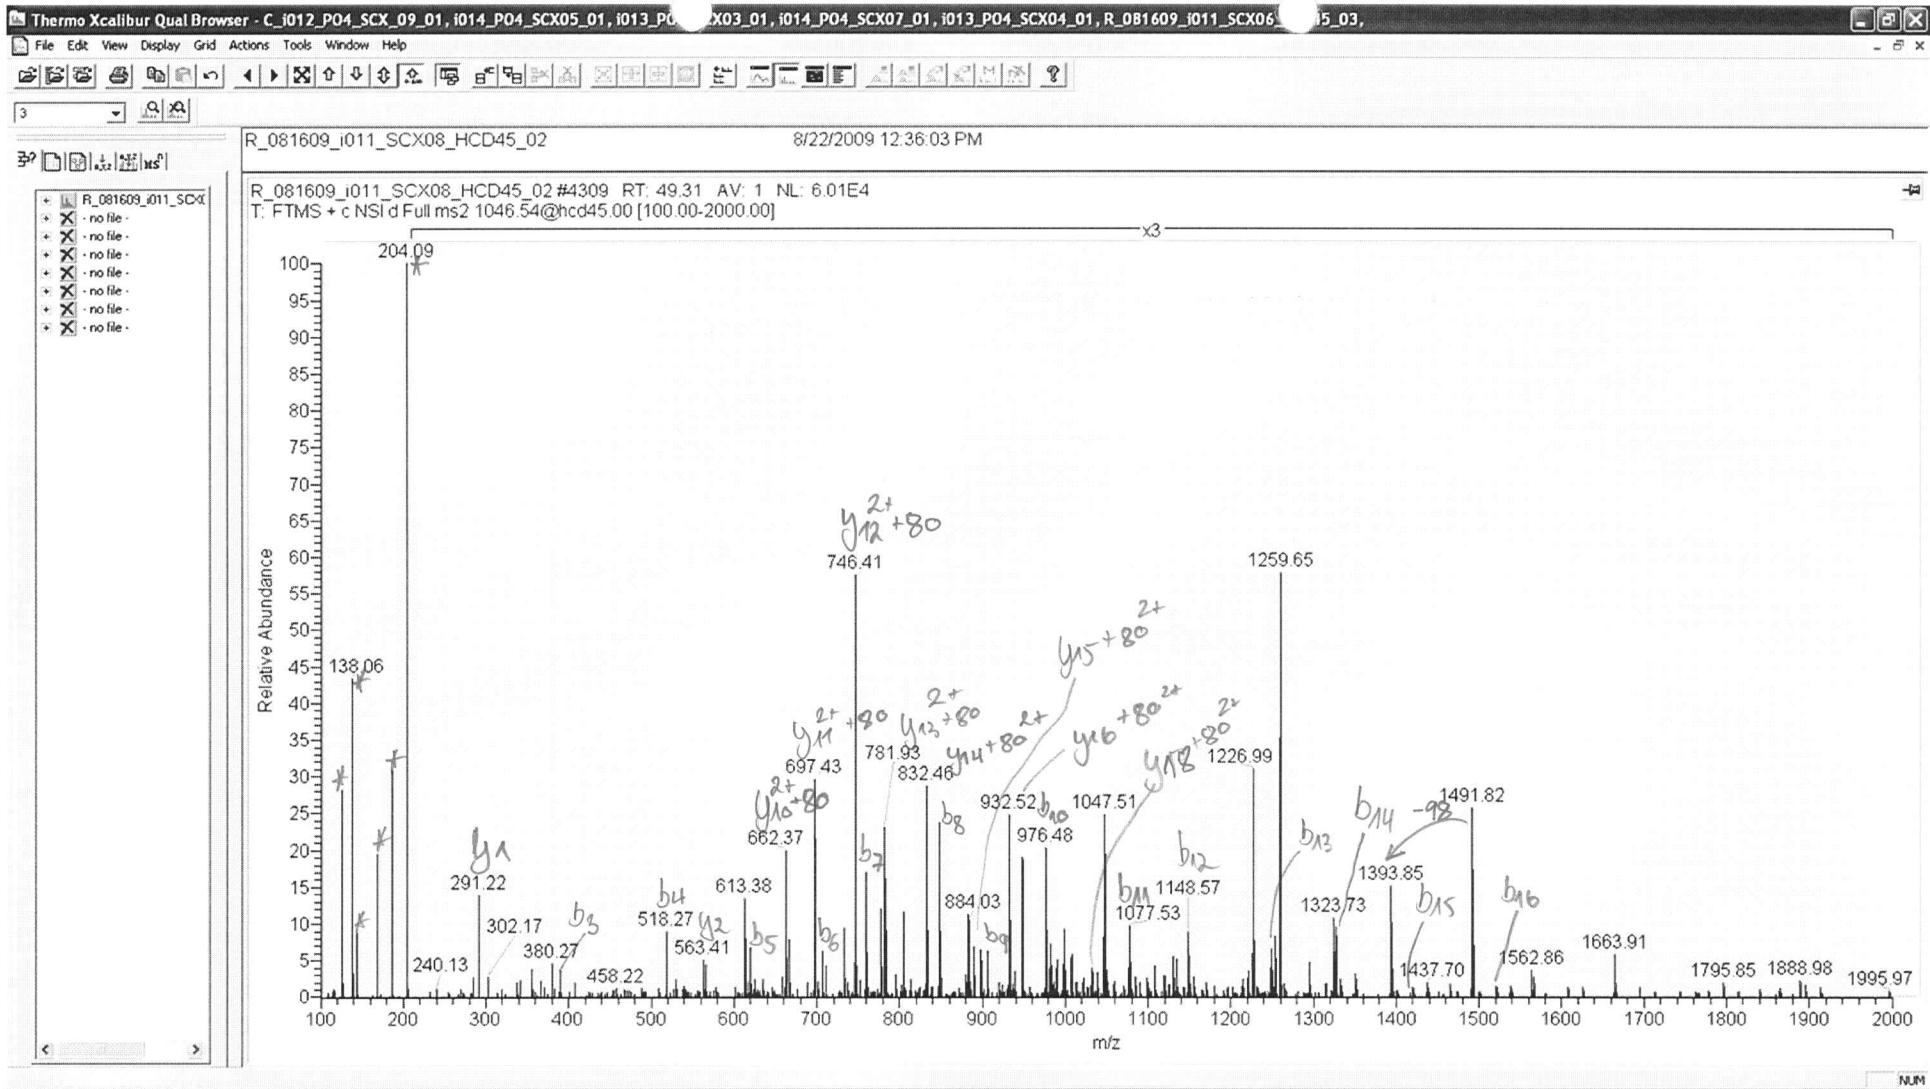

S32 : phospho  
O-glcNAc sites unknown  
N-term, K35, K36 :  
iTRAQ 4plex

217: sSAQTSAAAGATATtSTsSTVTVTAPAPAATGsPVkk  
(2 O-GlcNAc site, 1 phospho-site, Mascot score = 127, Oscore = 0.81)

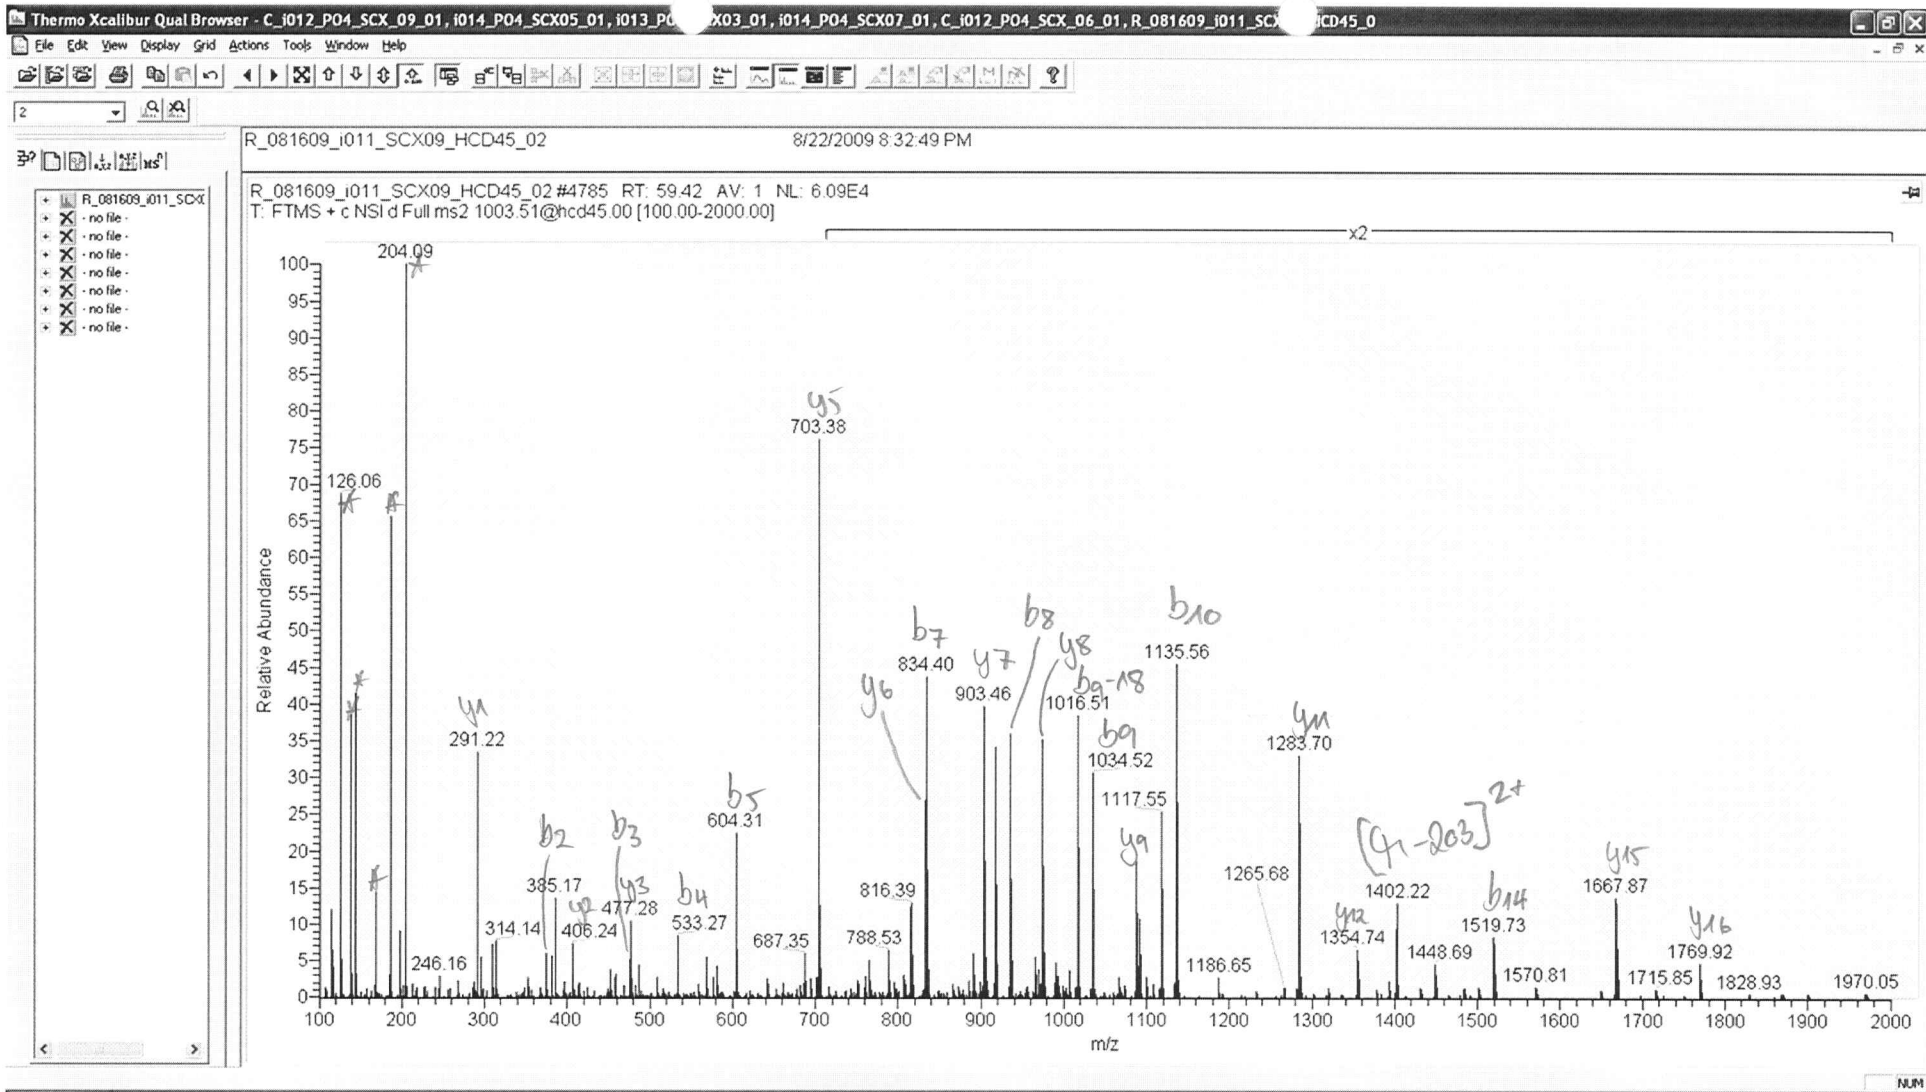

O-glcNAc site  
 unknown  
 10-term, 425: iTRAQ4plex

219: tETGATETVTPsEAPVLA<sup>y5</sup>AEPEADk  
 (1 O-GlcNAc<sup>b10</sup> site, 0 phospho-site, Mascot score = 85.1, Oscore = 1.08)

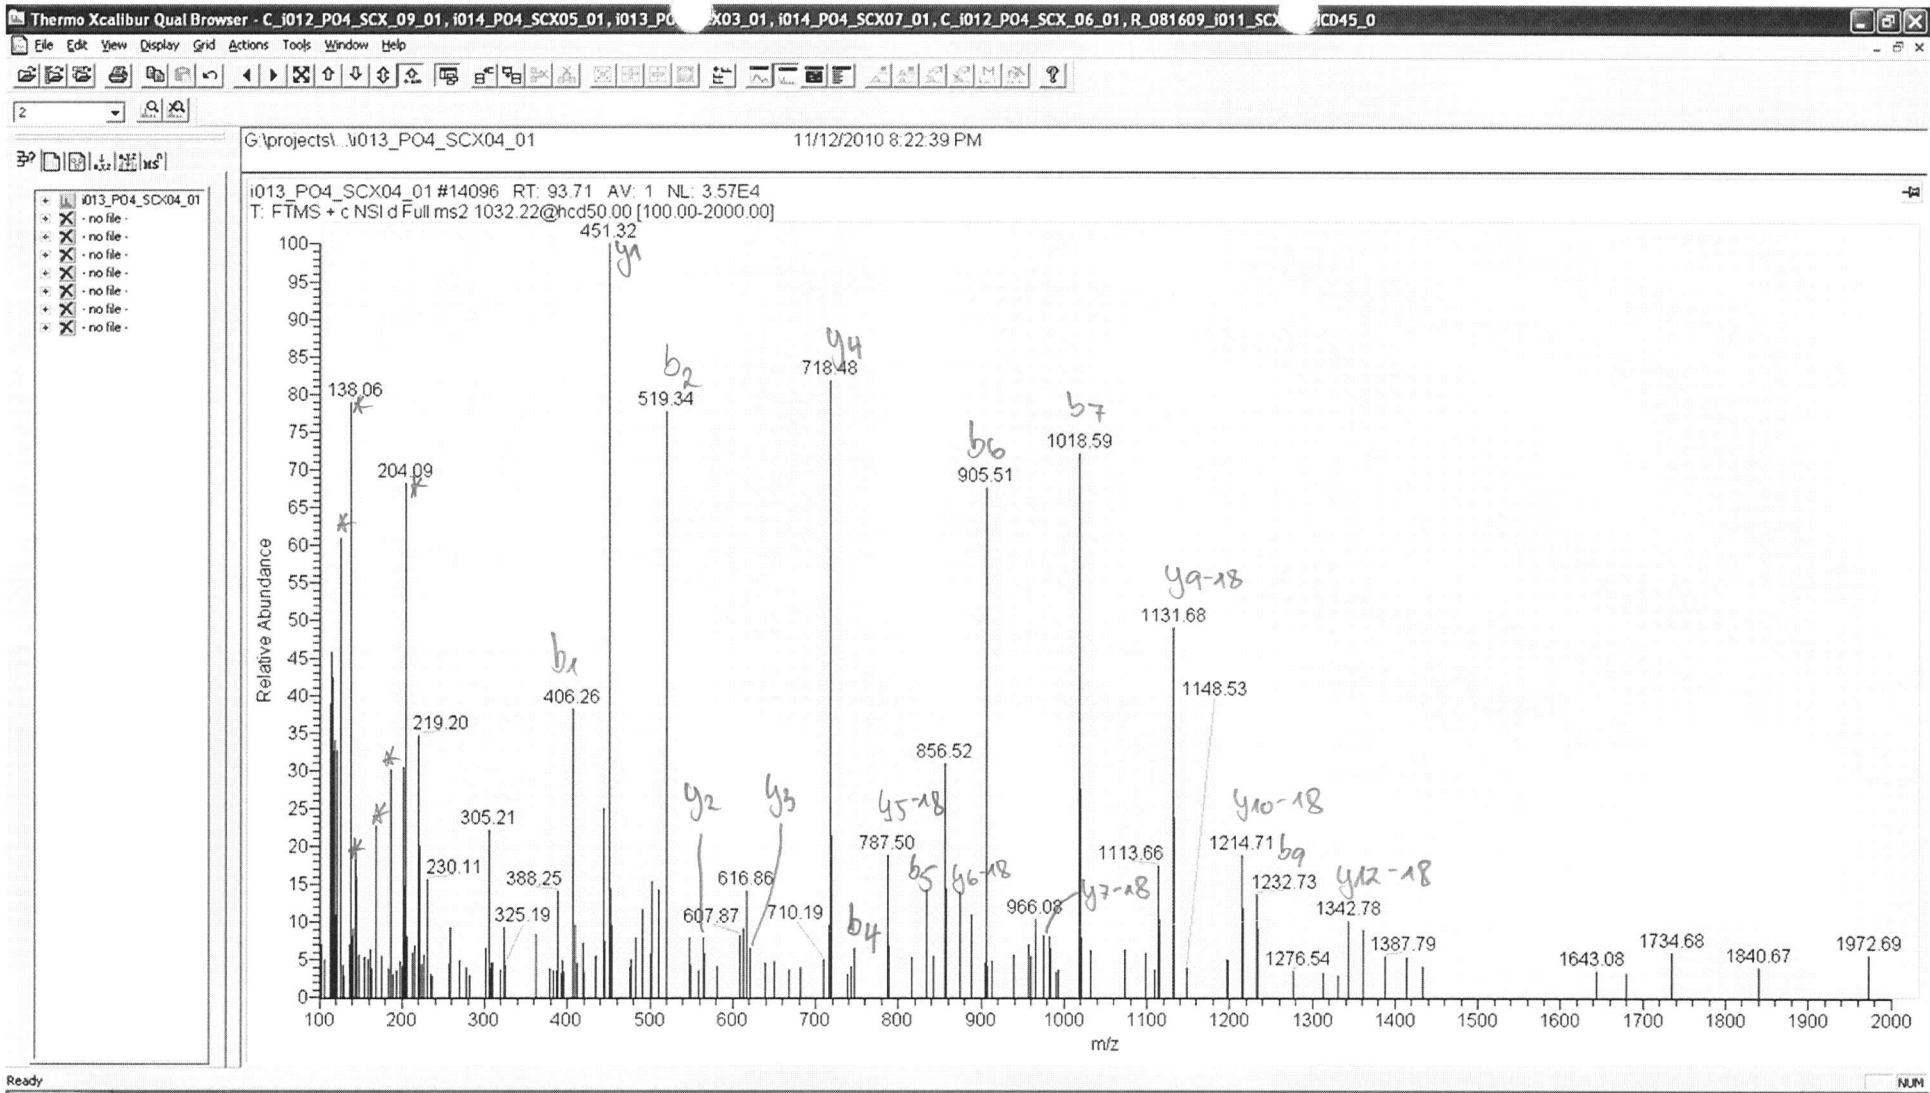

S19: phospho  
 oglcNAc unknown  
 N-term, K23: iTRAQ 8plex

220: tIPMSAIITQAGATGVT<sup>y5</sup>ssPGIK  
 (1 O-GlcNAc site, 1 phospho-site, Mascot score = 64, Oscore = 1.92)

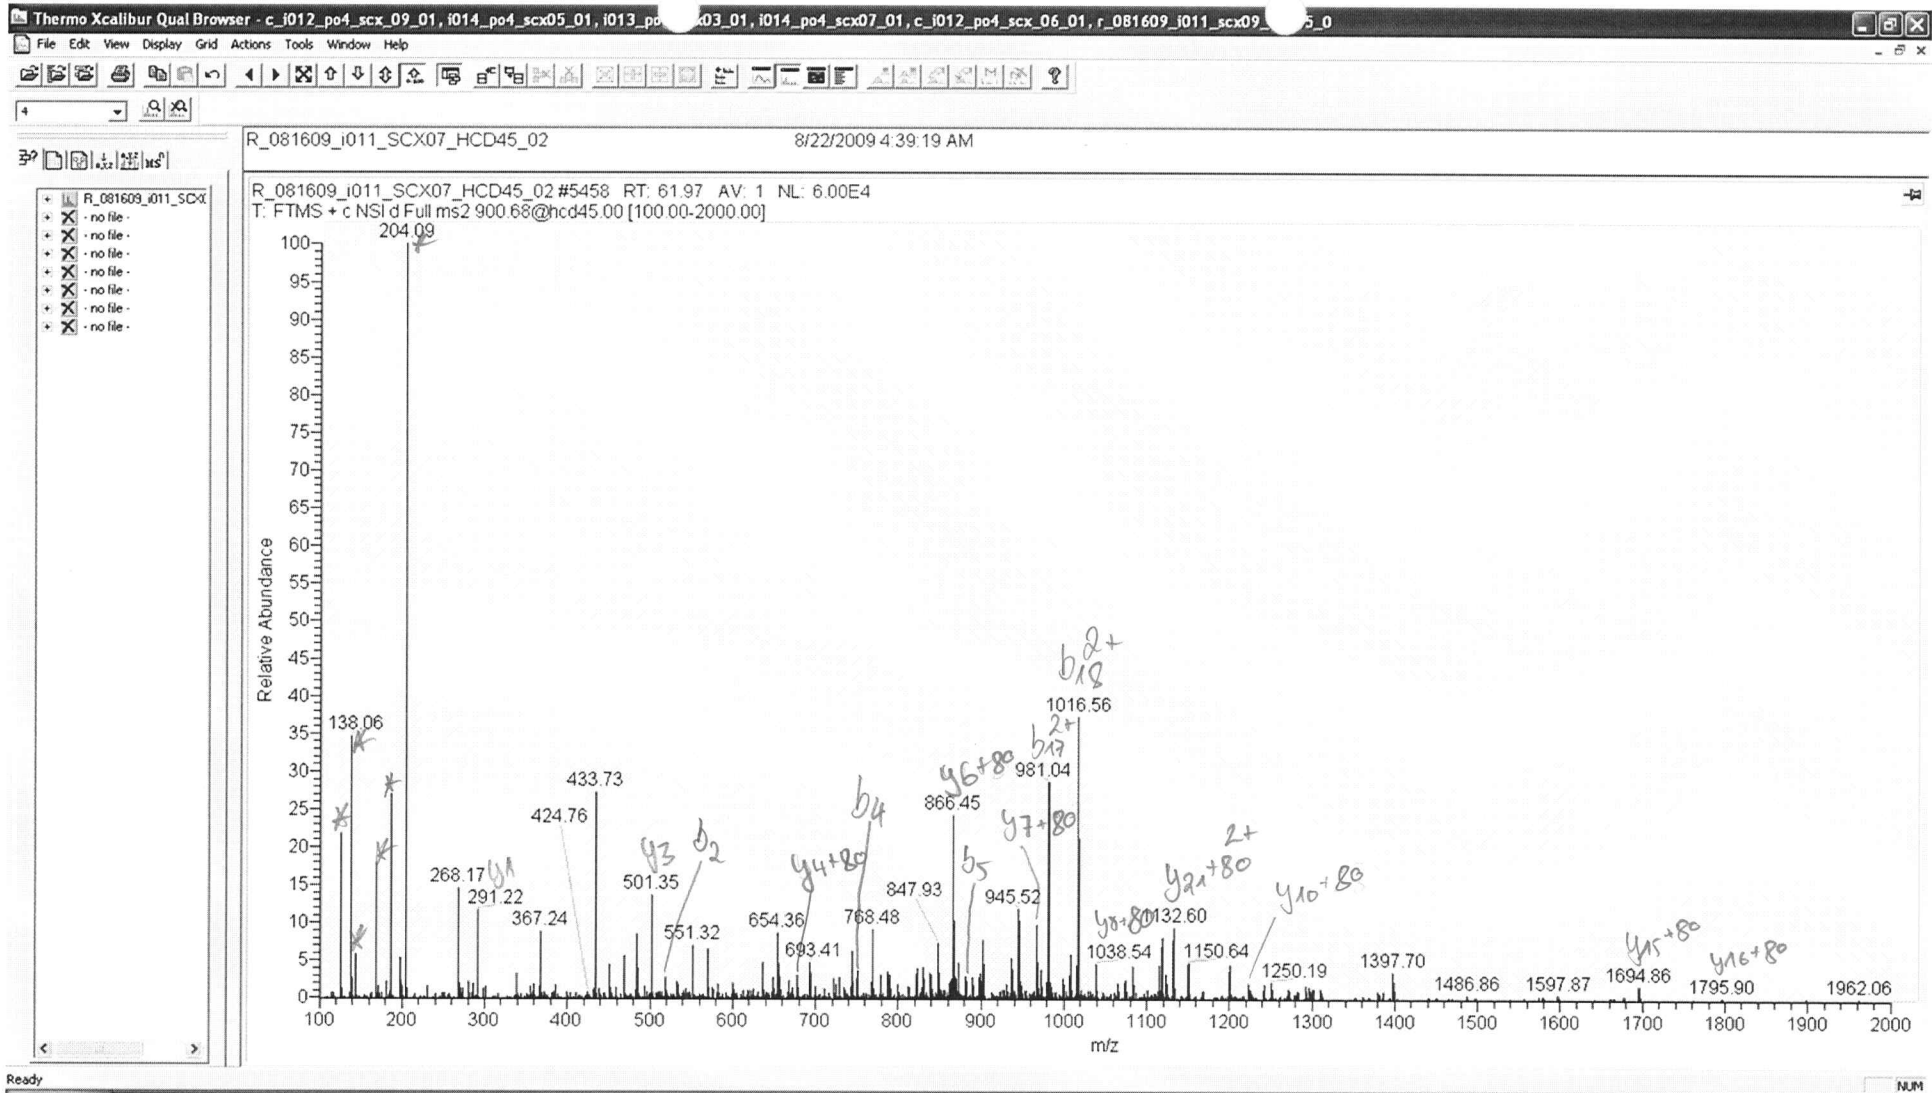

S36: phosphate

O-glcNAc unknown

N-term, K2, K39: iTRAQplex

221: tkPLASVTNANTSSTQAAPVAVTTPTVSSGQATPTsPIK

(1 O-GlcNAc site, 1 phospho-site, Mascot score = 71.4, Oscore = 1.27)

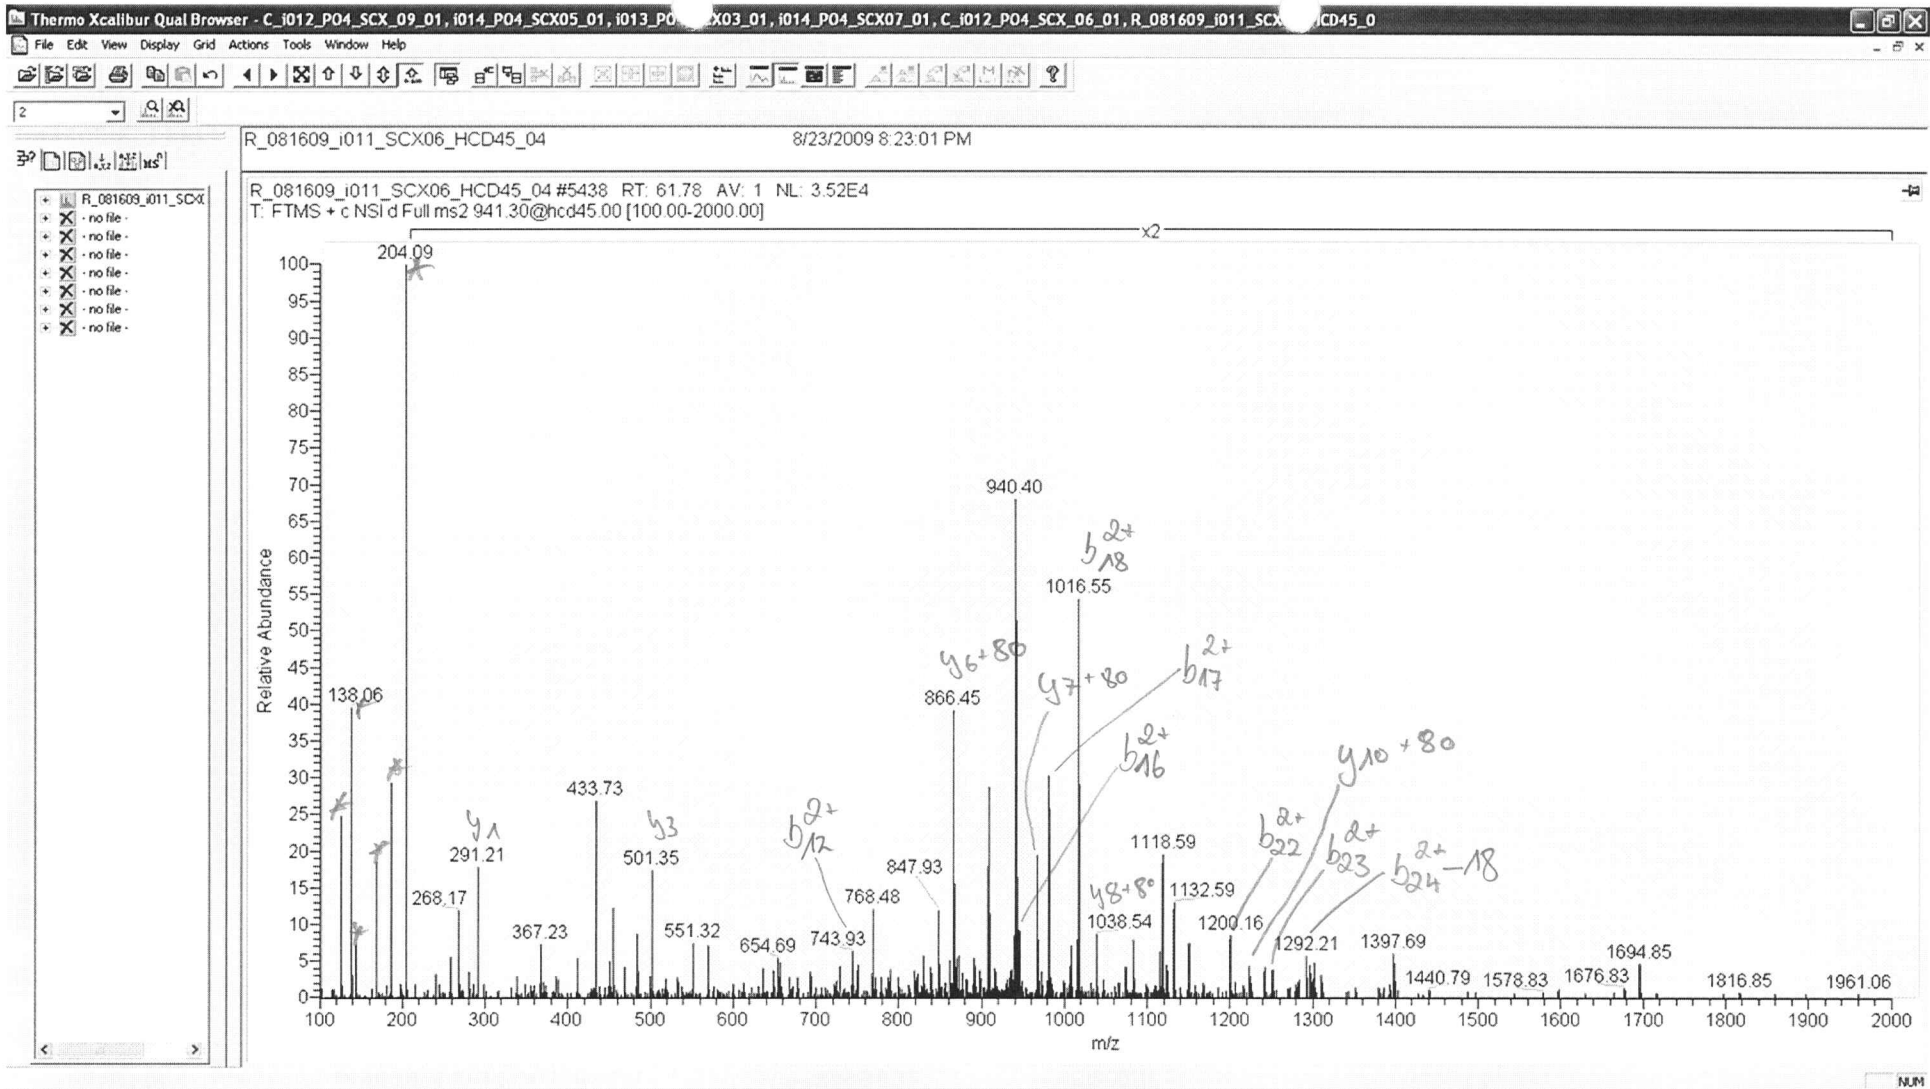

T24: phospho

O-GlcNAc site unknown

N-term, K2, K39: iTRAQ4plex

222: tkPLASVTNANTSSTQAAPVAVTtPTVSsGQATPTsPlk  
(2 O-GlcNAc site, 1 phospho-site, Mascot score = 47.2, Oscore = 0.95)



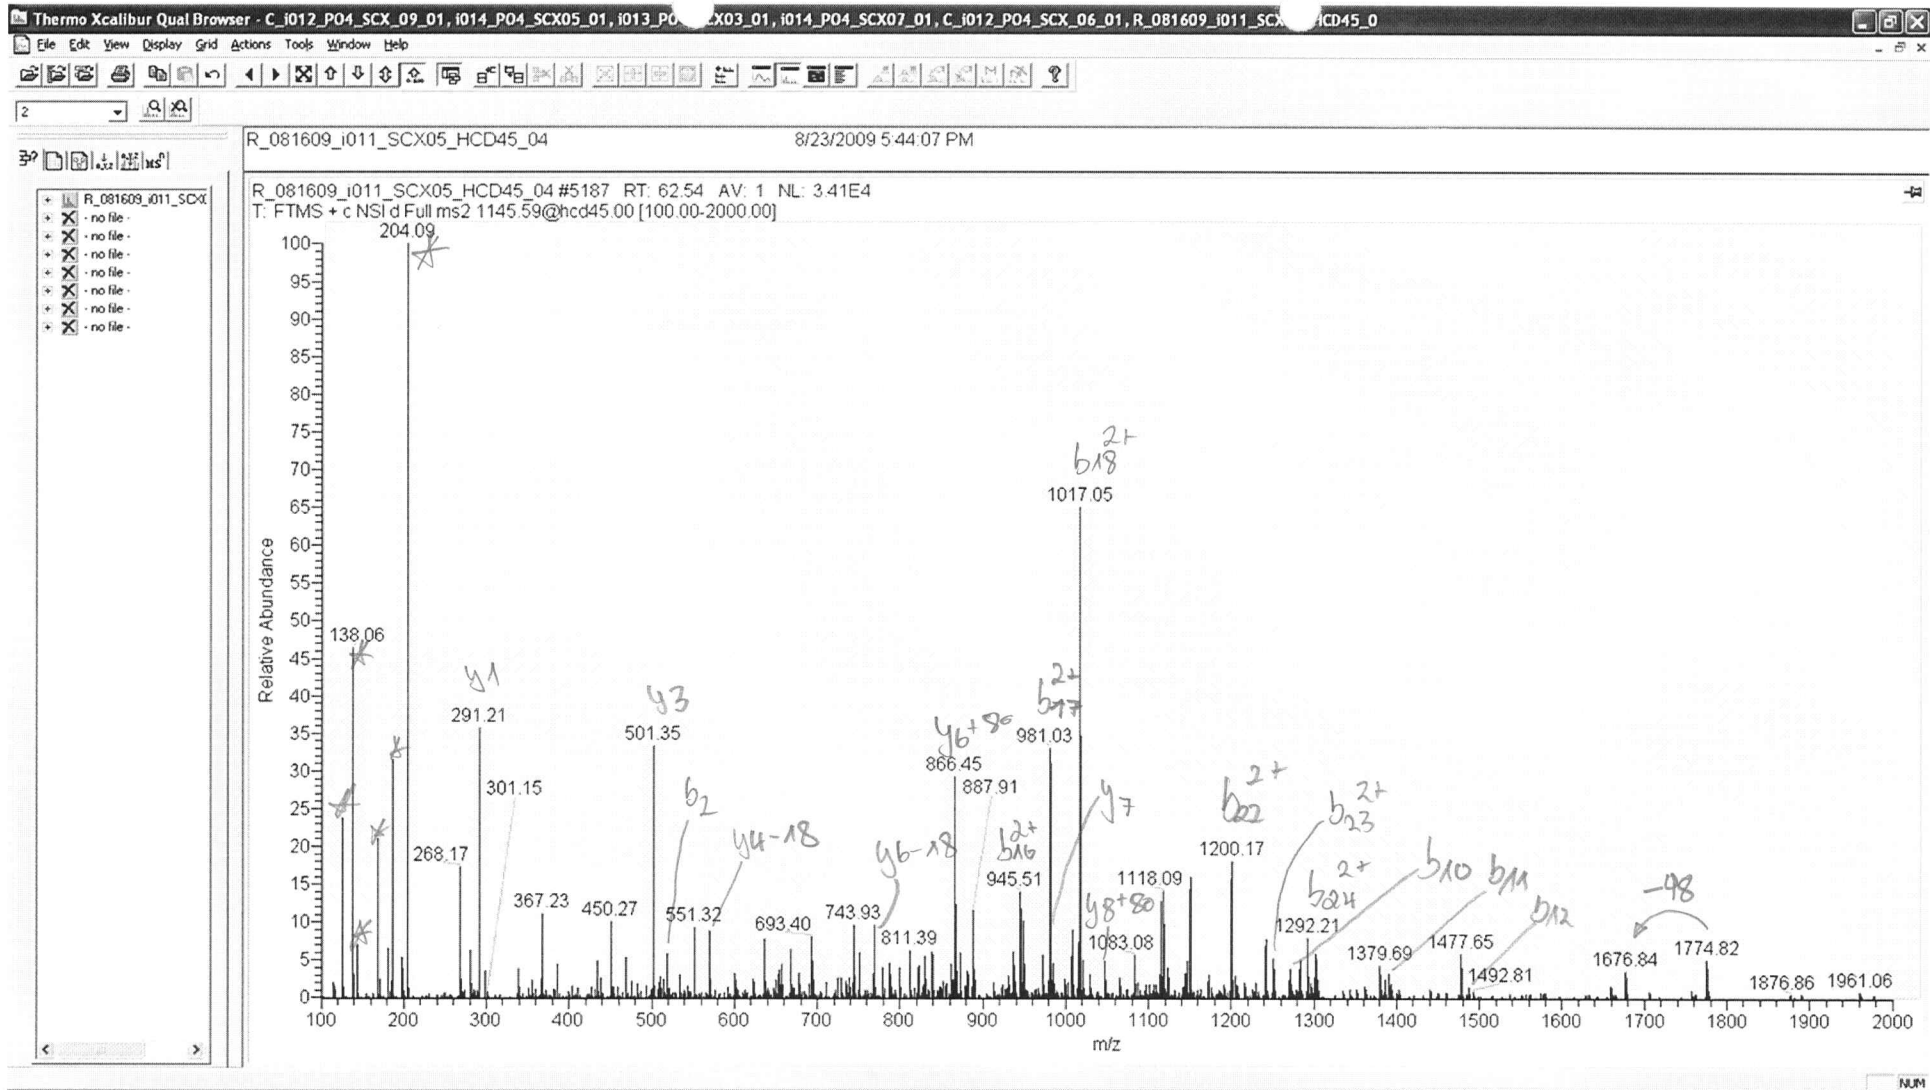

223: tkPLASVTNANTSSTQAAPVAVTTPTVSsGQAtPTsPIk  
 (1 O-GlcNAc site, 2 phospho-site, Mascot score = 98, Oscore = 1.41)

S36: phospho  
 2nd phospho-site and  
 oxygenic site unknown  
 N-term., K2, K39: iTRAQ4-plex

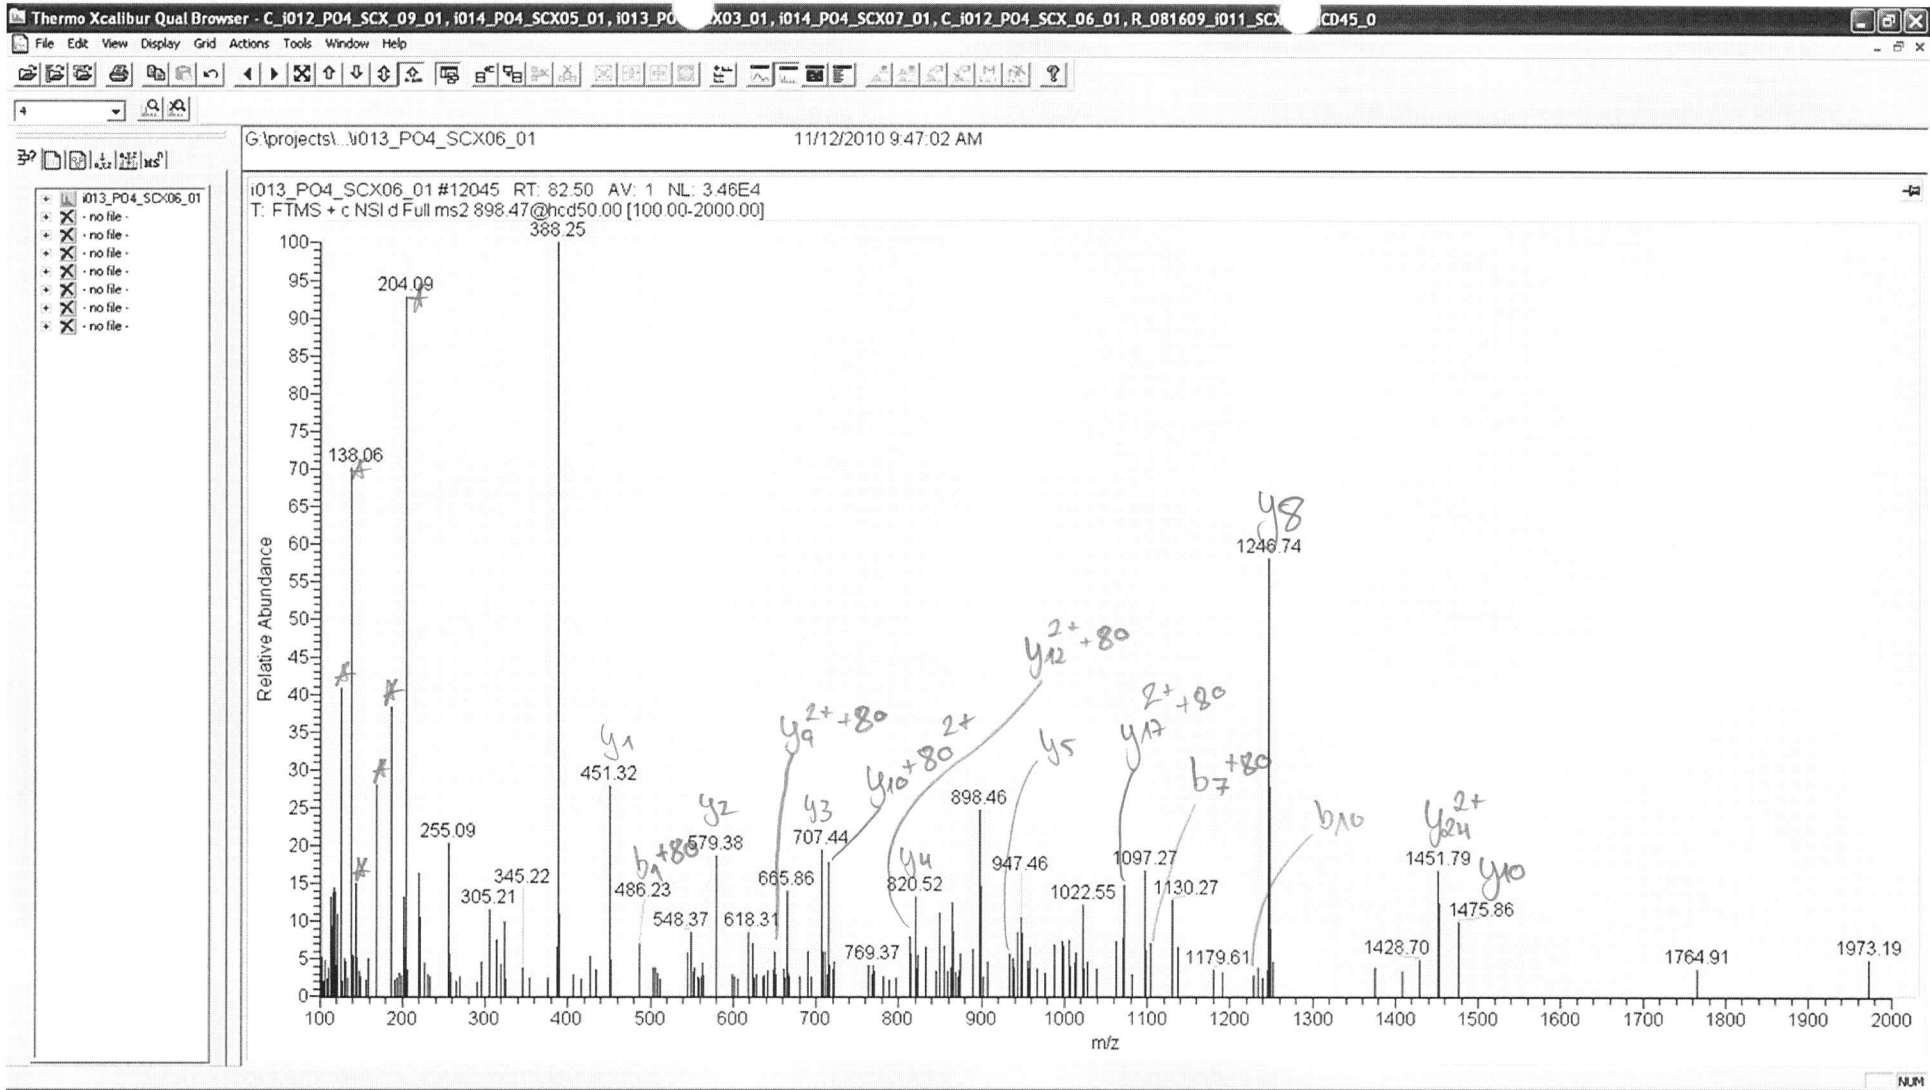

T1: phospho  
 O-glcNAc site unknown  
 N-term, U25: iTRAQ8plex

225: tPPTANHPVEPVTSVTQPSELLQQk  
 (1 O-GlcNAc site, 1 phospho-site, Mascot score = 25.8, Oscore = 1.48)



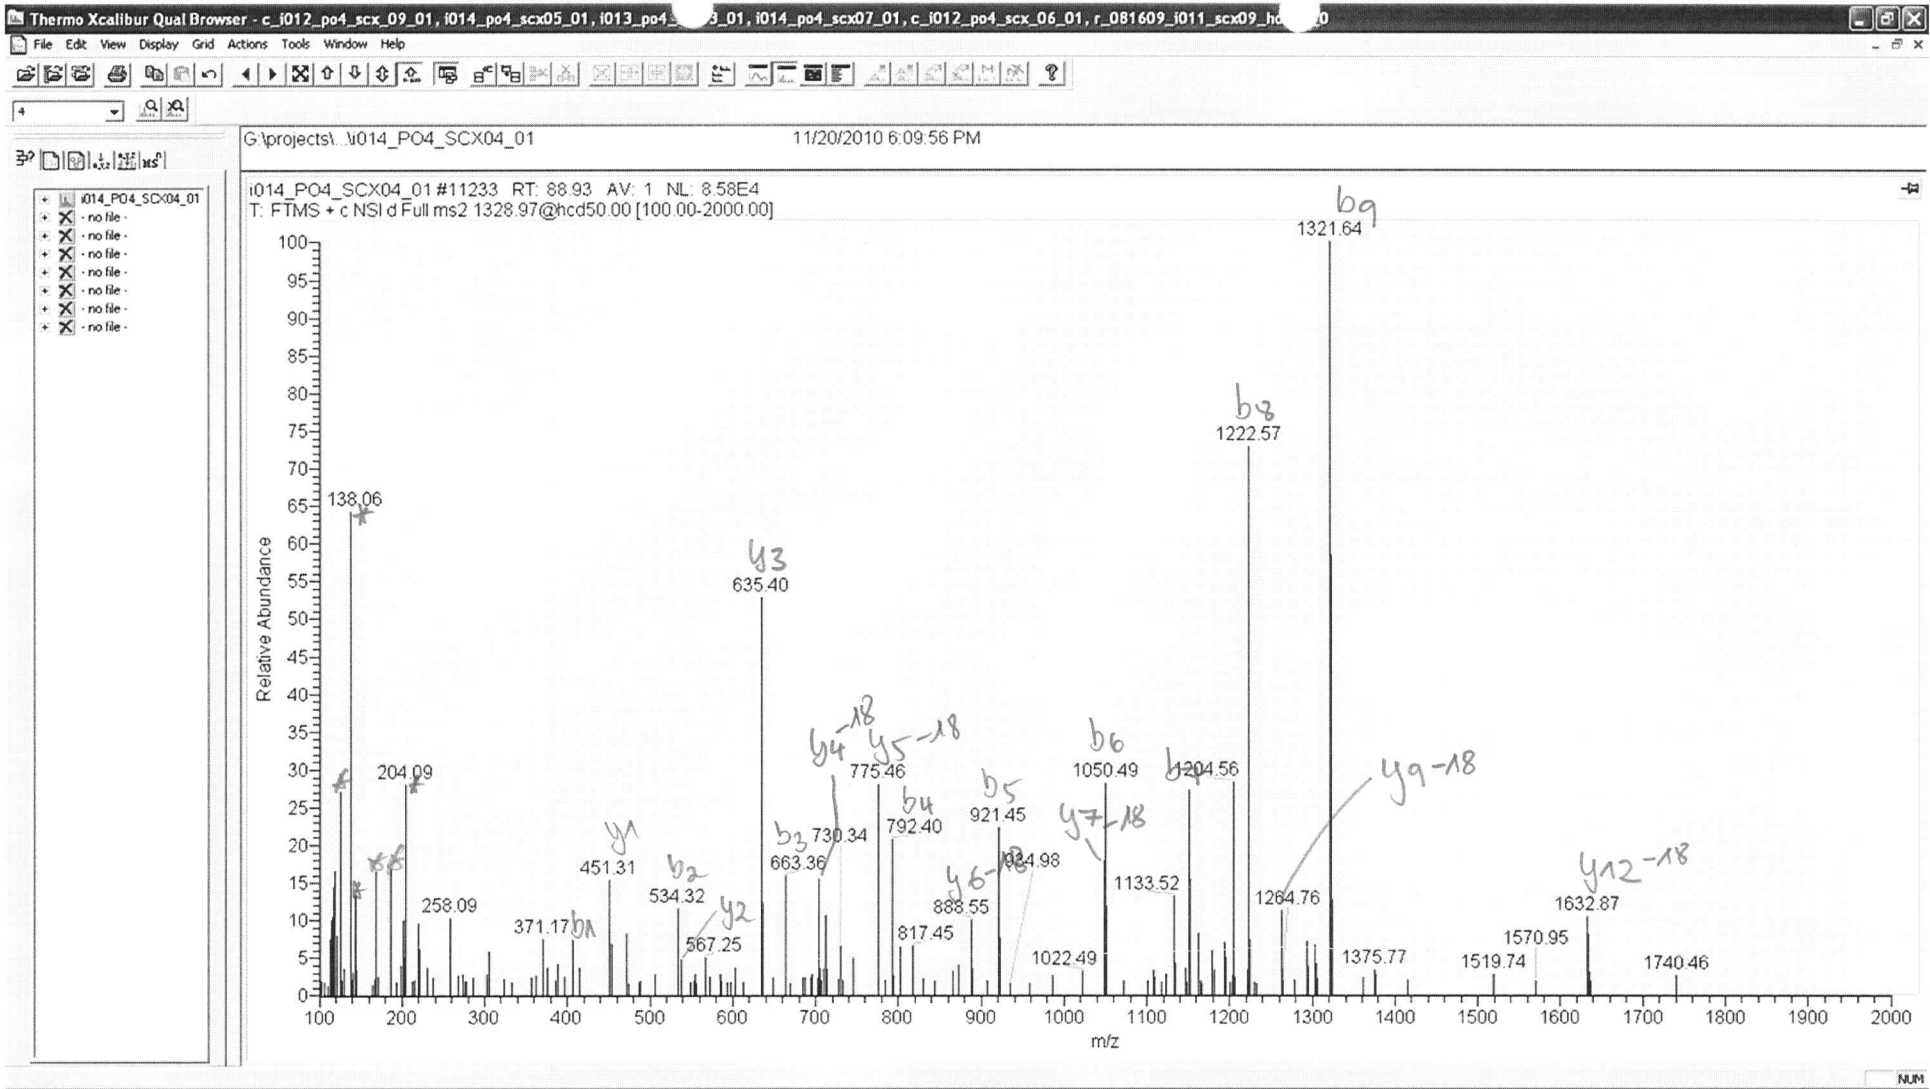

S26: phospho  
O-GlcNAc site unknown  
N-term., K29: iTRAQ8plex

227: tQEEETAVPTSQGTGTPcLTLCLAsPsk  
(1 O-GlcNAc site, 1 phospho-site, Mascot score = 69, Oscore = 1.79)

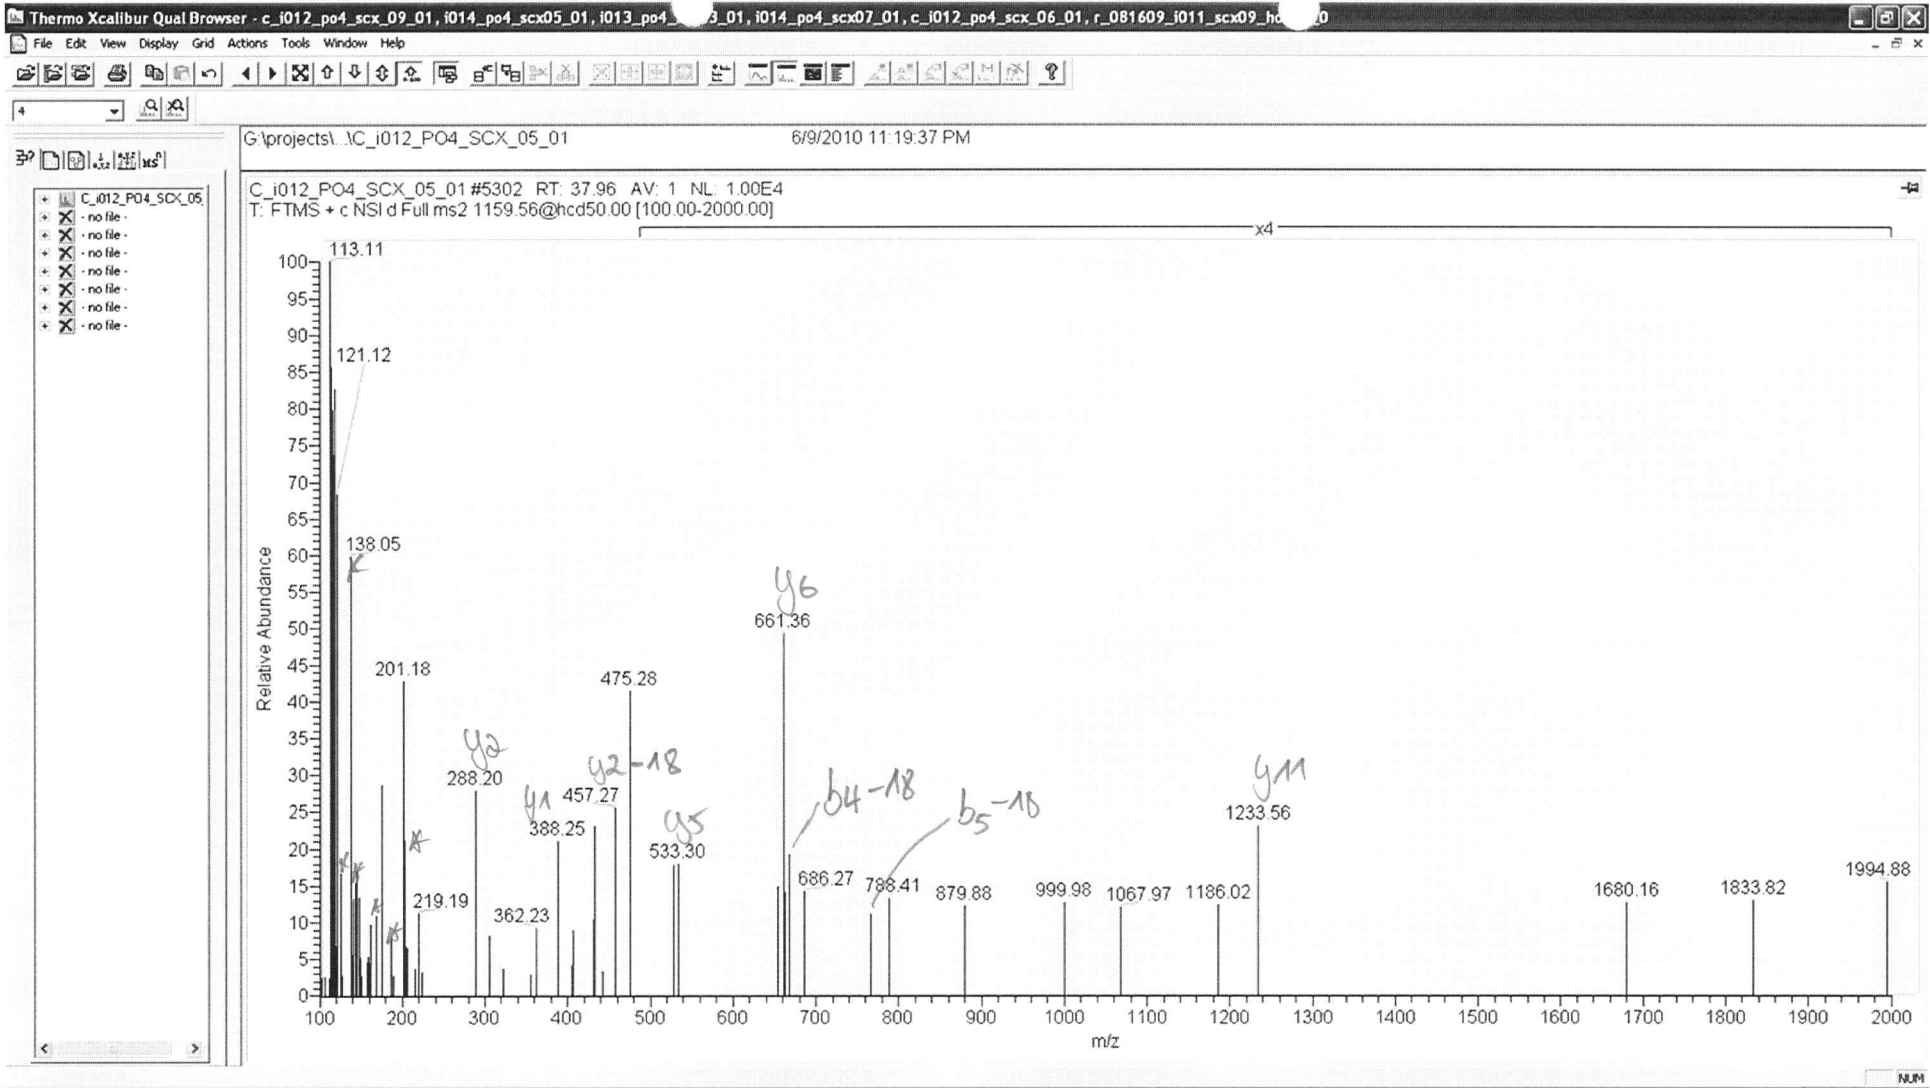

228: tsPLV<sup>y9</sup>SQNNEQ<sup>y5</sup>GSTLR

(1 O-GlcNAc site, 1 phospho-site, Mascot score = 10.8, Oscore = 2.13)

S2: phospho  
O-glcNAc site  
unknown

6-ton: iTRAQ 8plex

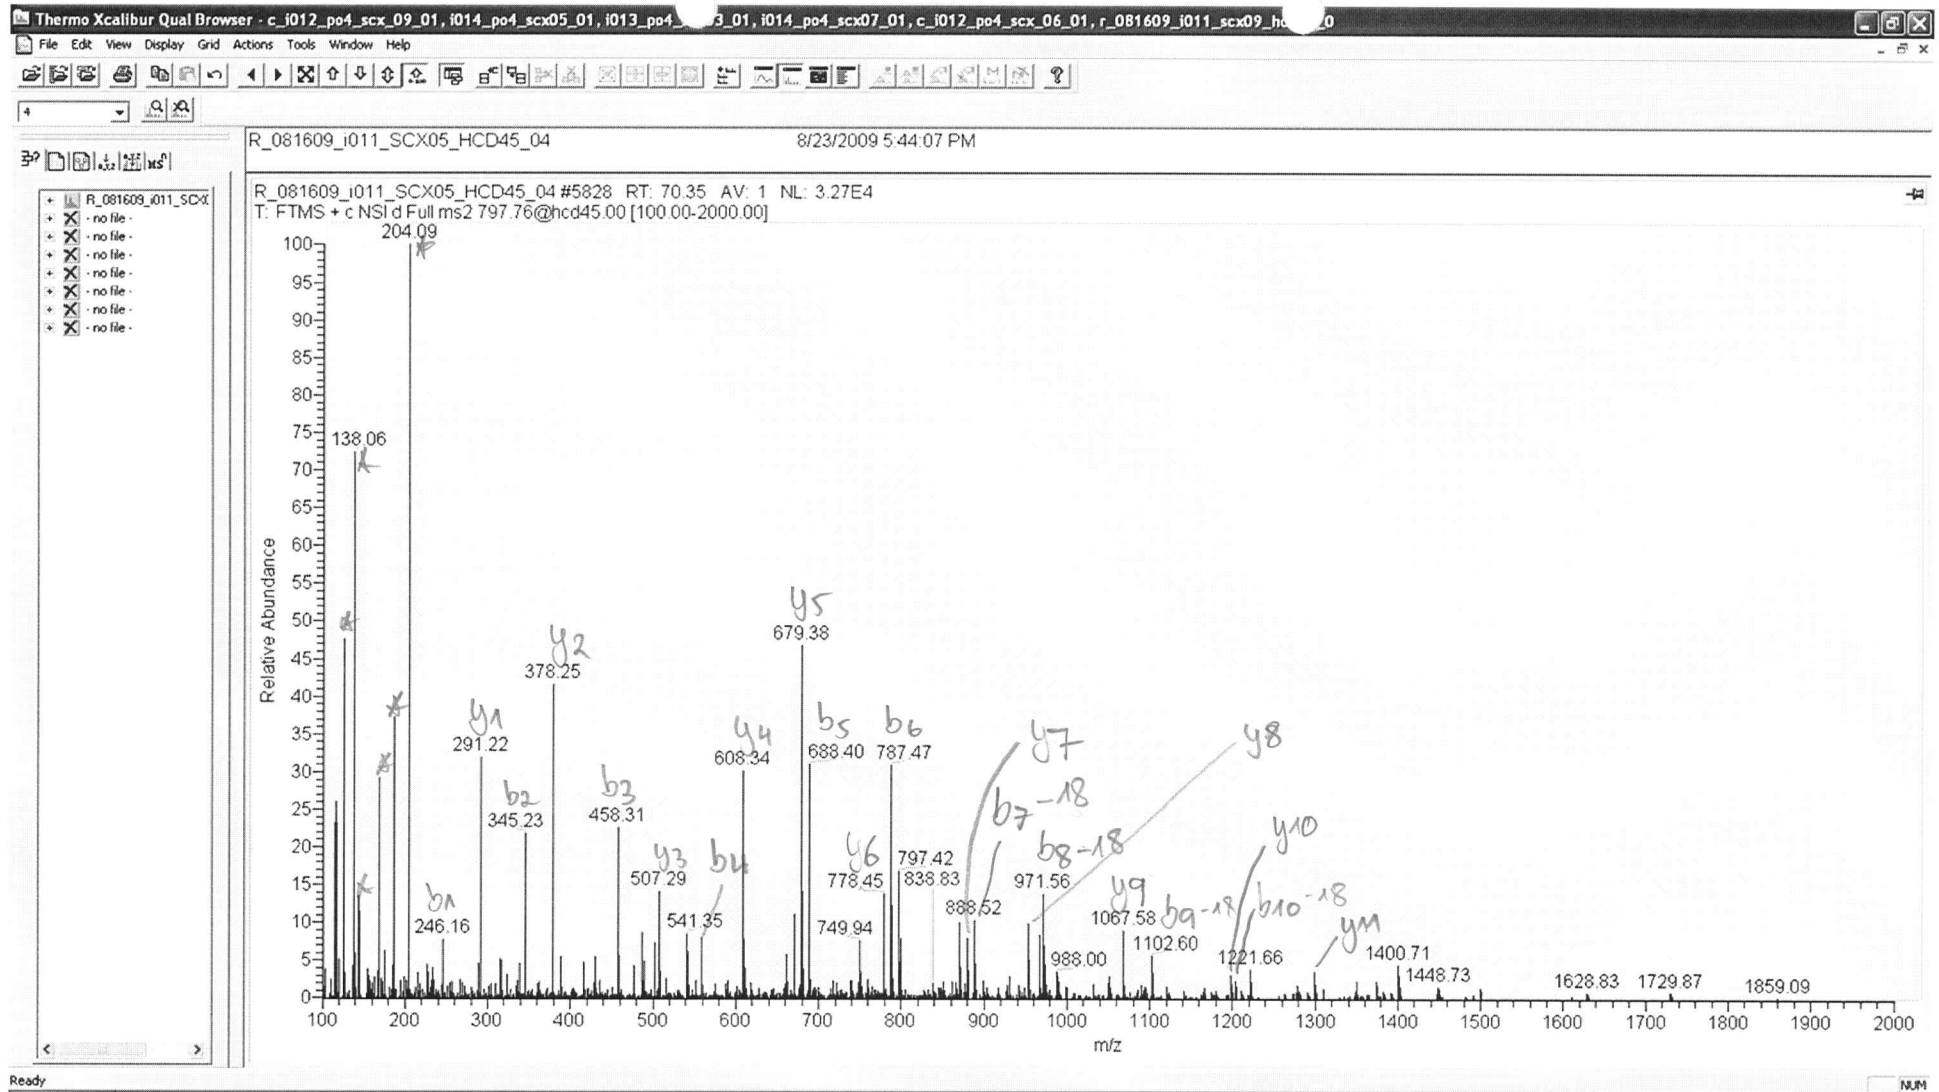

O-GlcNAc site unknown  
 N-term, V18: iTRAQ4plex

229: tVtEVTtMTSTVATESk

(1 O-GlcNAc site, 0 phospho-site, Mascot score = 90, Oscore = 0.97)
